# Supplementary material for: Mutant resources for functional genomics in Dictyostelium discoideum using REMI-seq technology
Source: BMC Biol. 2021 Aug 24;19:172. doi: 10.1186/s12915-021-01108-y (PMC8386026; doi:10.1186/s12915-021-01108-y)
Supplement: Supplementary file 1 — Additional file 1. Lookup table for all possible insertion sites in the D. discoideum genome. Using the complete genome sequences of Dictyostelium discoideum the positions of all DpnII (GATC) and NlaIII (CATG) sites were identified as well as 20 bp up- and downstream of the recognition sites (genomic tags; Tab 1). Then, the number of occurrences of each tag in the genome as well as the location within or between genes was determined using this lookup table and the annotation File obtained from dictyBase. On top of this, the number of possible insertion sites was determined for each annotated gene (13,411; Tab 2) and all promoter regions (1,000 bp before the start codon). A short summary can be found in Tab 3. [file 12915_2021_1108_MOESM1_ESM.xlsx]

## Sheet: All possible sites
Chromosome	Position	Upstream Tag	occurrence upstream tag	Downstream Tag	occurrence downstream tag	uniqueness	Site	Gene	Direction	Short	Description	Upstream Gene	Downstream Gene	Direction of Upstream Gene	Direction of Downstream Gene	Distance to Upstream Gene	Distance to Downstream Gene
DDB0169550	790	GAAGCACCAACAGCAGGATC	1	GATCAGTATTATTAGCAGGA	1	unique	GATC	DDB_G0294048	+	nad4	NA	NA	NA	NA	NA	NA	NA
DDB0169550	1116	TATTGGAGTAATATATGATC	1	GATCGATGTAAAACAAGAAT	1	unique	GATC	DDB_G0294048	+	nad4	NA	NA	NA	NA	NA	NA	NA
DDB0169550	3379	GATGTAATGATGGCAAGATC	1	GATCAAAAAAACGTCGAGGA	1	unique	GATC	NA	NA	NA	NA	DDB_G0294020	DDB_G0294092	+	+	251	308
DDB0169550	4050	ATTTGATAGTTTATATGATC	1	GATCAACAACATACATATGA	1	unique	GATC	DDB_G0294092	+	cox3	NA	NA	NA	NA	NA	NA	NA
DDB0169550	4756	AATGACGGAATATATGGATC	1	GATCATTATTTTTCTTATTA	1	unique	GATC	DDB_G0294092	+	cox3	NA	NA	NA	NA	NA	NA	NA
DDB0169550	5302	AGTGGTTGATGAAATGGATC	1	GATCATAATCCCATAAATGA	1	unique	GATC	DDB_G0294090	+	DidioMp05	enriched in gametes	NA	NA	NA	NA	NA	NA
DDB0169550	5593	TGCATTTTATGGAAATGATC	1	GATCCGTATGTAAAAACCTT	1	unique	GATC	DDB_G0294090	+	DidioMp05	enriched in gametes	NA	NA	NA	NA	NA	NA
DDB0169550	5780	TTGGAAACGGATTCGAGATC	1	GATCCGAACATTATTTAATG	1	unique	GATC	DDB_G0294090	+	DidioMp05	enriched in gametes	NA	NA	NA	NA	NA	NA
DDB0169550	5929	ATTAGAGAAATTTTATGATC	1	GATCTGAATAGAGAAAGAAG	1	unique	GATC	DDB_G0294090	+	DidioMp05	enriched in gametes	NA	NA	NA	NA	NA	NA
DDB0169550	6488	TATTTATATCCAAGTGGATC	1	GATCATTAGTGTGGATCATA	1	unique	GATC	DDB_G0294088	+	cox1%2F2	NA	NA	NA	NA	NA	NA	NA
DDB0169550	6501	GTGGATCATTAGTGTGGATC	1	GATCATAAAAACATAGGAAC	1	unique	GATC	DDB_G0294088	+	cox1%2F2	NA	NA	NA	NA	NA	NA	NA
DDB0169550	6807	AAAAAGAAAAGAAAAGGATC	1	GATCATTCAACAGGAAGTTT	1	unique	GATC	DDB_G0294088	+	cox1%2F2	NA	NA	NA	NA	NA	NA	NA
DDB0169550	7039	AATTATATAGGAGTAGGATC	1	GATCCTCAGAGACTATACGT	1	unique	GATC	DDB_G0294088	+	cox1%2F2	NA	NA	NA	NA	NA	NA	NA
DDB0169550	7189	ATACCAATAATGGTAGGATC	1	GATCACCAGATGTAGCTTTT	1	unique	GATC	DDB_G0294088	+	cox1%2F2	NA	NA	NA	NA	NA	NA	NA
DDB0169550	7560	AACAATGTTAATTACAGATC	1	GATCGAAATTTTGAAACAAC	1	unique	GATC	DDB_G0294088	+	cox1%2F2	NA	NA	NA	NA	NA	NA	NA
DDB0169550	7587	TGAAACAACATTTTTCGATC	1	GATCCAATAGGAGGAGGAGA	1	unique	GATC	DDB_G0294088	+	cox1%2F2	NA	NA	NA	NA	NA	NA	NA
DDB0169550	7605	TCCAATAGGAGGAGGAGATC	1	GATCCAATACTGTATCAGCA	1	unique	GATC	DDB_G0294088	+	cox1%2F2	NA	NA	NA	NA	NA	NA	NA
DDB0169550	7737	AACGTGATTCTGAGTAGATC	1	GATCAGAAACCAATAACTAC	1	unique	GATC	DDB_G0294088	+	cox1%2F2	NA	NA	NA	NA	NA	NA	NA
DDB0169550	8401	ATTTTCTACTGAGCAAGATC	1	GATCAATTATATTTAGCATT	1	unique	GATC	DDB_G0294088	+	cox1%2F2	NA	NA	NA	NA	NA	NA	NA
DDB0169550	10082	TTGGAGTAAAAGGAATGATC	1	GATCTCAGCAATGAGTGCAA	1	unique	GATC	DDB_G0294088	+	cox1%2F2	NA	DDB_G0294423	DDB_G0294425	+	+	NA	NA
DDB0169550	10519	TGTACAAGAAAAATATGATC	1	GATCAAATTATTTATGAATT	1	unique	GATC	DDB_G0294088	+	cox1%2F2	NA	DDB_G0294423	DDB_G0294425	+	+	NA	NA
DDB0169550	10648	TAAAGATGCATATTTAGATC	1	GATCAACTTATAGCAAGAAT	1	unique	GATC	DDB_G0294088	+	cox1%2F2	NA	DDB_G0294423	DDB_G0294425	+	+	NA	NA
DDB0169550	11632	GAGAAATTCGGAGTAGGATC	1	GATCTGTAGAGACTATACGC	1	unique	GATC	DDB_G0294088	+	cox1%2F2	NA	DDB_G0294425	DDB_G0294080	+	+	NA	NA
DDB0169550	12012	TTAATAGCATCATATGGATC	1	GATCATTAATAACAGCATTT	1	unique	GATC	DDB_G0294088	+	cox1%2F2	NA	DDB_G0294425	DDB_G0294080	+	+	NA	NA
DDB0169550	12155	GCAAATAGGATTTCAAGATC	1	GATCCAGCAACACCAATAAT	1	unique	GATC	DDB_G0294088	+	cox1%2F2	NA	DDB_G0294425	DDB_G0294080	+	+	NA	NA
DDB0169550	12666	GCATATGGTAGTAATAGATC	1	GATCTAGAGAAGGTGTGCGT	1	unique	GATC	DDB_G0294088	+	cox1%2F2	NA	DDB_G0294425	DDB_G0294080	+	+	NA	NA
DDB0169550	12730	AAGAATATTTATTTATGATC	1	GATCTATGAATTCTTTAATA	1	unique	GATC	DDB_G0294080	+	ai4	NA	NA	NA	NA	NA	NA	NA
DDB0169550	13090	AATGTACAATTCAAGAGATC	1	GATCTATATAAAAGATAAAT	1	unique	GATC	DDB_G0294080	+	ai4	NA	NA	NA	NA	NA	NA	NA
DDB0169550	13791	TGAATTATGTGGAGTAGATC	1	GATCATGGATTTATGCCAAT	1	unique	GATC	DDB_G0294088	+	cox1%2F2	NA	DDB_G0294080	DDB_G0294012	+	+	NA	NA
DDB0169550	14010	CGCTGGCATCTTACGAGATC	1	GATCCACGTAAATGTAATAC	1	unique	GATC	NA	NA	NA	NA	DDB_G0294080	DDB_G0294012	+	+	806	1093
DDB0169550	14253	AGTACGGATGAACTAAGATC	1	GATCGGTTATATGAGAGGGA	1	unique	GATC	NA	NA	NA	NA	DDB_G0294080	DDB_G0294012	+	+	1049	850
DDB0169550	14274	GTTATATGAGAGGGAAGATC	1	GATCAAATCGAAAAGGAAAT	1	unique	GATC	NA	NA	NA	NA	DDB_G0294080	DDB_G0294012	+	+	1070	829
DDB0169550	14689	GGATACCTTATCTCCCGATC	1	GATCAAAAAGAGAATTTGAA	1	unique	GATC	NA	NA	NA	NA	DDB_G0294080	DDB_G0294012	+	+	1485	414
DDB0169550	14839	AAAAAAAAATAGTATAGATC	1	GATCAATAATAAACTAATAG	1	unique	GATC	NA	NA	NA	NA	DDB_G0294080	DDB_G0294012	+	+	1635	264
DDB0169550	16097	GAAAAATATGGTTGTGGATC	1	GATCATTAACAGCATTTCCA	1	unique	GATC	DDB_G0294012	+	atp1	alpha subunit of the central stalk of mitochondrial F1F0 ATP synthase%2C the enzyme complex responsible for ATP synthesis	NA	NA	NA	NA	NA	NA
DDB0169550	16265	TCTGTAAGTCGAGTAGGATC	1	GATCAGCAGCTCAATCTGCT	1	unique	GATC	DDB_G0294012	+	atp1	alpha subunit of the central stalk of mitochondrial F1F0 ATP synthase%2C the enzyme complex responsible for ATP synthesis	NA	NA	NA	NA	NA	NA
DDB0169550	16526	GATTTATCTTTAGTTAGATC	1	GATCGGAAGAAACAAAATTA	1	unique	GATC	DDB_G0294012	+	atp1	alpha subunit of the central stalk of mitochondrial F1F0 ATP synthase%2C the enzyme complex responsible for ATP synthesis	NA	NA	NA	NA	NA	NA
DDB0169550	16829	ACAATTAGTAAAATATGATC	1	GATCACGCACTCTTGATCTG	1	unique	GATC	NA	NA	NA	NA	DDB_G0294012	DDB_G0294034	+	+	167	1751
DDB0169550	16843	ATGATCACGCACTCTTGATC	1	GATCTGAAAGATCAAACAAG	1	unique	GATC	NA	NA	NA	NA	DDB_G0294012	DDB_G0294034	+	+	181	1737
DDB0169550	16852	CACTCTTGATCTGAAAGATC	1	GATCAAACAAGAGTGTTTCC	1	unique	GATC	NA	NA	NA	NA	DDB_G0294012	DDB_G0294034	+	+	190	1728
DDB0169550	17915	AAATAATTAAGACATAGATC	1	GATCTAAACTTGAGCACTAA	1	unique	GATC	NA	NA	NA	NA	DDB_G0294012	DDB_G0294034	+	+	1253	665
DDB0169550	18100	ATTTATAATAACACCGGATC	1	GATCTTTTTATTAGAAATTA	1	unique	GATC	NA	NA	NA	NA	DDB_G0294012	DDB_G0294034	+	+	1438	480
DDB0169550	18607	AAAAATGTTTATAACGGATC	1	GATCTCTATGCAAATAAGAA	1	unique	GATC	DDB_G0294034	+	rnlA	the mitochondrial large ribosomal RNA is specifically degraded upon infection with %3Ci%3ELegionella pneumophila%3C%2Fi%3E	NA	NA	NA	NA	NA	NA
DDB0169550	18694	AGCAATAGCAATTGAAGATC	1	GATCTATAAATATCCGAAGG	1	unique	GATC	DDB_G0294034	+	rnlA	the mitochondrial large ribosomal RNA is specifically degraded upon infection with %3Ci%3ELegionella pneumophila%3C%2Fi%3E	NA	NA	NA	NA	NA	NA
DDB0169550	19234	AGACCCGAAACCAAGCGATC	1	GATCTAATTATGAACACGCA	1	unique	GATC	DDB_G0294034	+	rnlA	the mitochondrial large ribosomal RNA is specifically degraded upon infection with %3Ci%3ELegionella pneumophila%3C%2Fi%3E	NA	NA	NA	NA	NA	NA
DDB0169550	19932	CTGATTAGGGTTACGCGATC	1	GATCGCTAAGATTAATATGA	1	unique	GATC	DDB_G0294034	+	rnlA	the mitochondrial large ribosomal RNA is specifically degraded upon infection with %3Ci%3ELegionella pneumophila%3C%2Fi%3E	NA	NA	NA	NA	NA	NA
DDB0169550	20629	TACTTATGATGCTTATGATC	1	GATCTTTTGGTTTTGGCCAA	1	unique	GATC	DDB_G0294034	+	rnlA	the mitochondrial large ribosomal RNA is specifically degraded upon infection with %3Ci%3ELegionella pneumophila%3C%2Fi%3E	NA	NA	NA	NA	NA	NA
DDB0169550	20848	GAAAGACCTACAAGTCGATC	1	GATCAGAGACGCAAGTCGAT	1	unique	GATC	DDB_G0294034	+	rnlA	the mitochondrial large ribosomal RNA is specifically degraded upon infection with %3Ci%3ELegionella pneumophila%3C%2Fi%3E	NA	NA	NA	NA	NA	NA
DDB0169550	20865	ATCAGAGACGCAAGTCGATC	1	GATCATAGTGATCCAATAGT	1	unique	GATC	DDB_G0294034	+	rnlA	the mitochondrial large ribosomal RNA is specifically degraded upon infection with %3Ci%3ELegionella pneumophila%3C%2Fi%3E	NA	NA	NA	NA	NA	NA
DDB0169550	20874	GCAAGTCGATCATAGTGATC	1	GATCCAATAGTTCTGTGTGG	1	unique	GATC	DDB_G0294034	+	rnlA	the mitochondrial large ribosomal RNA is specifically degraded upon infection with %3Ci%3ELegionella pneumophila%3C%2Fi%3E	NA	NA	NA	NA	NA	NA
DDB0169550	21135	GAACGTTCAACGACTAGATC	1	GATCTTGAGGTGTGTAACCA	1	unique	GATC	DDB_G0294034	+	rnlA	the mitochondrial large ribosomal RNA is specifically degraded upon infection with %3Ci%3ELegionella pneumophila%3C%2Fi%3E	NA	NA	NA	NA	NA	NA
DDB0169550	21161	TGTGTAACCAATAATAGATC	1	GATCCAAGAGTACCAAGCAA	1	unique	GATC	DDB_G0294034	+	rnlA	the mitochondrial large ribosomal RNA is specifically degraded upon infection with %3Ci%3ELegionella pneumophila%3C%2Fi%3E	NA	NA	NA	NA	NA	NA
DDB0169550	21706	AGGACTGAGGTGGGTCGATC	1	GATCACTGGTGTATTAATTA	1	unique	GATC	DDB_G0294034	+	rnlA	the mitochondrial large ribosomal RNA is specifically degraded upon infection with %3Ci%3ELegionella pneumophila%3C%2Fi%3E	NA	NA	NA	NA	NA	NA
DDB0169550	21943	ATTCTATAATTAATGTGATC	1	GATCTTATTTATTAAGATTA	1	unique	GATC	DDB_G0294034	+	rnlA	the mitochondrial large ribosomal RNA is specifically degraded upon infection with %3Ci%3ELegionella pneumophila%3C%2Fi%3E	NA	NA	NA	NA	NA	NA
DDB0169550	22327	AGTCCCAGTCCCAAAGGATC	1	GATCGTTCATCCGTAAATCA	1	unique	GATC	NA	NA	NA	NA	DDB_G0294034	DDB_G0294637	+	+	330	130
DDB0169550	23187	AGAGGTTTATATTTTGGATC	1	GATCATACCAAAAACCAAAT	1	unique	GATC	DDB_G0294078	+	cytB	NA	NA	NA	NA	NA	NA	NA
DDB0169550	23578	ATTTATTTTCATTTATGATC	1	GATCTTTTTAGTATTATTTT	1	unique	GATC	DDB_G0294078	+	cytB	NA	NA	NA	NA	NA	NA	NA
DDB0169550	23724	TTTTATGCAATGTTAAGATC	1	GATCTATTCCTAATAAAGTC	1	unique	GATC	DDB_G0294078	+	cytB	NA	NA	NA	NA	NA	NA	NA
DDB0169550	23895	TTTTTAGGATTTTTAGGATC	1	GATCGCAACCAGCGGCTGCT	1	unique	GATC	DDB_G0294078	+	cytB	NA	NA	NA	NA	NA	NA	NA
DDB0169550	24587	GCAATTGAGTTTAAAGGATC	1	GATCCCTTGGAACGATCGCA	1	unique	GATC	DDB_G0350617	+	atp4	mitochondrial ATPase subunitt%3B UniProt record available: %3Ca href%3D%22http:%2F%2Fwww.uniprot.org%2Funiprot%2FA9CLV8%22 target%3D%22new%22%3EA9CLV8%3C%2Fa%3E	NA	NA	NA	NA	NA	NA
DDB0169550	24600	AAGGATCCCTTGGAACGATC	1	GATCGCAAACGTAATTAAAA	1	unique	GATC	DDB_G0350617	+	atp4	mitochondrial ATPase subunitt%3B UniProt record available: %3Ca href%3D%22http:%2F%2Fwww.uniprot.org%2Funiprot%2FA9CLV8%22 target%3D%22new%22%3EA9CLV8%3C%2Fa%3E	NA	NA	NA	NA	NA	NA
DDB0169550	24930	ATATGAATGTGGTTTTGATC	1	GATCCTTTTGGTAATGCAAG	1	unique	GATC	DDB_G0294022	+	nad3	NA	NA	NA	NA	NA	NA	NA
DDB0169550	25798	GGTGGTTCGAGAGAATGATC	1	GATCATCCACATTGGTATTG	1	unique	GATC	NA	NA	NA	NA	DDB_G0294639	DDB_G0305150	+	+	331	139
DDB0169550	25879	CAATGAGCGCAAGCTTGATC	1	GATCCAGCTACACTGAGTGA	1	unique	GATC	NA	NA	NA	NA	DDB_G0294639	DDB_G0305150	+	+	412	58
DDB0169550	26348	TCCGCCTGAGTAGTACGATC	1	GATCGCAAGATTGAAACTCA	1	unique	GATC	NA	NA	NA	NA	DDB_G0305150	DDB_G0294641	+	+	271	737
DDB0169550	26835	ATTGCTAGTAATCGTAGATC	1	GATCATAAGGCTTCGGTGAA	1	unique	GATC	NA	NA	NA	NA	DDB_G0305150	DDB_G0294641	+	+	758	250
DDB0169550	27859	TTTTTAGGAGGATTACGATC	1	GATCAGCAGCGCAAATGGTT	1	unique	GATC	DDB_G0294018	+	nad1	NA	NA	NA	NA	NA	NA	NA
DDB0169550	28287	ACCAAGATATAGATATGATC	1	GATCAATTAATGTATTTAGG	1	unique	GATC	DDB_G0294018	+	nad1	NA	NA	NA	NA	NA	NA	NA
DDB0169550	29343	ATTCGTTAGTTATTTGGATC	1	GATCTTCTTGAAAAAGTTGT	1	unique	GATC	NA	NA	NA	NA	DDB_G0294647	DDB_G0294016	+	+	172	339
DDB0169550	29425	AAAGGGAATGTAAAAGGATC	1	GATCTAAACTACATACCTTA	1	unique	GATC	NA	NA	NA	NA	DDB_G0294647	DDB_G0294016	+	+	254	257
DDB0169550	30121	ATATCGGTTCGAGTCCGATC	1	GATCGGGAGCACGTAAAAAA	1	unique	GATC	DDB_G0294649	+	tRNA-Met-CAU-2	transfers a methionine residue to a growing polypeptide chain during protein synthesis%0A	NA	NA	NA	NA	NA	NA
DDB0169550	31006	AGCTTTACCATATTTTGATC	1	GATCGATTAGATTATGTATC	1	unique	GATC	DDB_G0294030	+	nad7	conserved core subunit of the mitochondrial membrane respiratory chain NADH dehydrogenase (Complex I)	NA	NA	NA	NA	NA	NA
DDB0169550	31506	TATTAAGAGGAGCAGGGATC	1	GATCGTATATGATATTAGAA	1	unique	GATC	DDB_G0294030	+	nad7	conserved core subunit of the mitochondrial membrane respiratory chain NADH dehydrogenase (Complex I)	NA	NA	NA	NA	NA	NA
DDB0169550	31936	AAACATGATGTCAAAAGATC	1	GATCATTTATTAGCTGATGT	1	unique	GATC	DDB_G0294030	+	nad7	conserved core subunit of the mitochondrial membrane respiratory chain NADH dehydrogenase (Complex I)	NA	NA	NA	NA	NA	NA
DDB0169550	32215	AACATATAGGAGAAATGATC	1	GATCTATGAATTCGTAGTAG	1	unique	GATC	DDB_G0294014	+	atp6	NA	NA	NA	NA	NA	NA	NA
DDB0169550	33263	GATTAGCATTAAGAGTGATC	1	GATCCTATGGATAAATGTAA	1	unique	GATC	DDB_G0294040	+	mrpl11	protein component of the mitochondrial large ribosomal subunit	NA	NA	NA	NA	NA	NA
DDB0169550	33523	ATCTTAGGAACATGTAGATC	1	GATCCTGTAAAATATACGTA	1	unique	GATC	DDB_G0294040	+	mrpl11	protein component of the mitochondrial large ribosomal subunit	NA	NA	NA	NA	NA	NA
DDB0169550	33944	TCTTTAAAAAGGGATGGATC	1	GATCTTATAGAGTAATAAGA	1	unique	GATC	DDB_G0294076	+	DidioMp21	NA	NA	NA	NA	NA	NA	NA
DDB0169550	34452	GTAAGAAAAAATAGAAGATC	1	GATCAAAATTTTCAGTTAAA	1	unique	GATC	DDB_G0294074	+	mrps12	protein component of the small ribosomal subunit	NA	NA	NA	NA	NA	NA
DDB0169550	34868	TGTAAAGGCTTCCAAAGATC	1	GATCAAGGAGAAGTAGTGAA	1	unique	GATC	DDB_G0294072	+	mrps7	protein component of the small ribosomal subunit	NA	NA	NA	NA	NA	NA
DDB0169550	35082	ATAAAGGATTAATTGCGATC	1	GATCAGATCAAGAGGAGGTG	1	unique	GATC	DDB_G0294036	+	mrpl2	protein component of the mitochondrial large ribosomal subunit	NA	NA	NA	NA	NA	NA
DDB0169550	35087	GGATTAATTGCGATCAGATC	1	GATCAAGAGGAGGTGCTTTA	1	unique	GATC	DDB_G0294036	+	mrpl2	protein component of the mitochondrial large ribosomal subunit	NA	NA	NA	NA	NA	NA
DDB0169550	35185	AATGAGAATAGAATATGATC	1	GATCCAAATAGAAGTGCACA	1	unique	GATC	DDB_G0294036	+	mrpl2	protein component of the mitochondrial large ribosomal subunit	NA	NA	NA	NA	NA	NA
DDB0169550	35276	GCCAAATTAGAAGTAGGATC	1	GATCATTAATAATAACAAGT	1	unique	GATC	DDB_G0294036	+	mrpl2	protein component of the mitochondrial large ribosomal subunit	NA	NA	NA	NA	NA	NA
DDB0169550	35632	AGCAATGAATCCAGTAGATC	1	GATCATCCACATGGGGGAAG	1	unique	GATC	DDB_G0294036	+	mrpl2	protein component of the mitochondrial large ribosomal subunit	NA	NA	NA	NA	NA	NA
DDB0169550	35799	AAATAAAAAATGGTTAGATC	1	GATCACGGTGGAAAGGAATA	1	unique	GATC	DDB_G0294044	+	mrps19	protein component of the small ribosomal subunit	NA	NA	NA	NA	NA	NA
DDB0169550	37911	ACGCTTTTAAAAAATCGATC	1	GATCTTACATCGATTTTTAA	1	unique	GATC	DDB_G0294068	+	DidioMp27	contains the C terminus domain of the ribosomal S3 subunits%3B neighboring gene DidioMp26 contains the N terminus	NA	NA	NA	NA	NA	NA
DDB0169550	38161	AAGCGAAATACTTAAAGATC	1	GATCGACAAATACAGGAATA	1	unique	GATC	DDB_G0294068	+	DidioMp27	contains the C terminus domain of the ribosomal S3 subunits%3B neighboring gene DidioMp26 contains the N terminus	NA	NA	NA	NA	NA	NA
DDB0169550	38205	CTATAAGAAGAAAGATGATC	1	GATCTATAAAAATCGATCCT	1	unique	GATC	DDB_G0294068	+	DidioMp27	contains the C terminus domain of the ribosomal S3 subunits%3B neighboring gene DidioMp26 contains the N terminus	NA	NA	NA	NA	NA	NA
DDB0169550	38219	ATGATCTATAAAAATCGATC	1	GATCCTTTAATAAATATAAG	1	unique	GATC	DDB_G0294068	+	DidioMp27	contains the C terminus domain of the ribosomal S3 subunits%3B neighboring gene DidioMp26 contains the N terminus	NA	NA	NA	NA	NA	NA
DDB0169550	38562	AAAAATTAAACACAAAGATC	1	GATCCAAACTATAATTAAAA	1	unique	GATC	DDB_G0294068	+	DidioMp27	contains the C terminus domain of the ribosomal S3 subunits%3B neighboring gene DidioMp26 contains the N terminus	NA	NA	NA	NA	NA	NA
DDB0169550	38992	ACAATTTTCTTCGATTGATC	1	GATCCAAACTTAAGTTATTG	1	unique	GATC	DDB_G0294068	+	DidioMp27	contains the C terminus domain of the ribosomal S3 subunits%3B neighboring gene DidioMp26 contains the N terminus	NA	NA	NA	NA	NA	NA
DDB0169550	41540	CCCTTAAGTCTGAAAAGATC	1	GATCGACAAAAATTTCGAGA	1	unique	GATC	DDB_G0294068	+	DidioMp27	contains the C terminus domain of the ribosomal S3 subunits%3B neighboring gene DidioMp26 contains the N terminus	NA	NA	NA	NA	NA	NA
DDB0169550	41695	TAAATTAAATTATAAAGATC	1	GATCGAGAATTAAGAATGTC	1	unique	GATC	DDB_G0294068	+	DidioMp27	contains the C terminus domain of the ribosomal S3 subunits%3B neighboring gene DidioMp26 contains the N terminus	NA	NA	NA	NA	NA	NA
DDB0169550	42215	TTTTTTGGAATCATTGGATC	1	GATCAAGTATAACAGCGGAA	1	unique	GATC	DDB_G0294068	+	DidioMp27	contains the C terminus domain of the ribosomal S3 subunits%3B neighboring gene DidioMp26 contains the N terminus	NA	NA	NA	NA	NA	NA
DDB0169550	42284	TTAACGAAACGAAATGGATC	1	GATCAGCTTTATTATTAAAG	1	unique	GATC	DDB_G0294068	+	DidioMp27	contains the C terminus domain of the ribosomal S3 subunits%3B neighboring gene DidioMp26 contains the N terminus	NA	NA	NA	NA	NA	NA
DDB0169550	43492	AAGTACAATAGCATTAGATC	1	GATCATGTAAATATAAAAAT	1	unique	GATC	DDB_G0294064	+	DidioMp30	NA	NA	NA	NA	NA	NA	NA
DDB0169550	44064	ACGTAATGAATTATTAGATC	1	GATCAAGAAACACGAAATTA	1	unique	GATC	DDB_G0294062	+	mrps14	protein component of the small ribosomal subunit	NA	NA	NA	NA	NA	NA
DDB0169550	44161	TGTGTGGAAACAGGCAGATC	1	GATCACGAGGAATAATAAGT	1	unique	GATC	DDB_G0294062	+	mrps14	protein component of the small ribosomal subunit	NA	NA	NA	NA	NA	NA
DDB0169550	44337	AGTGTAACCGTTATAGGATC	1	GATCAAAACGTGTATTTGAA	1	unique	GATC	DDB_G0294060	+	mrps8	protein component of the small ribosomal subunit	NA	NA	NA	NA	NA	NA
DDB0169550	45070	GTAGTAAAATTAGAAGGATC	1	GATCACAAATCATCTTATAT	1	unique	GATC	DDB_G0294038	+	mrpl6	protein component of the mitochondrial large ribosomal subunit	NA	NA	NA	NA	NA	NA
DDB0169550	46510	ATTAAAAGCATATTTTGATC	1	GATCAATTACGAATAAACAA	1	unique	GATC	DDB_G0294054	+	DidioMp36	NA	NA	NA	NA	NA	NA	NA
DDB0169550	47517	TAAATTTACAAATGAGGATC	1	GATCGTAACCGATTTATTAA	1	unique	GATC	DDB_G0294054	+	DidioMp36	NA	NA	NA	NA	NA	NA	NA
DDB0169550	47630	AGTCAAAACCCACGAAGATC	1	GATCACGAAATGCAGGGCCG	1	unique	GATC	DDB_G0294054	+	DidioMp36	NA	NA	NA	NA	NA	NA	NA
DDB0169550	47651	CGAAATGCAGGGCCGAGATC	1	GATCTGATTATAAAGTTATT	1	unique	GATC	DDB_G0294054	+	DidioMp36	NA	NA	NA	NA	NA	NA	NA
DDB0169550	48178	TAACCCAAAAGAAATCGATC	1	GATCCATTGGAGAAAAAAAA	1	unique	GATC	DDB_G0294054	+	DidioMp36	NA	NA	NA	NA	NA	NA	NA
DDB0169550	48409	ATGGTATATATATGAAGATC	1	GATCAAGGATTACTTCGAAT	1	unique	GATC	DDB_G0294054	+	DidioMp36	NA	NA	NA	NA	NA	NA	NA
DDB0169550	49093	AGATTGTCCAATTTGTGATC	1	GATCAAGGAGGAGAATGTGA	1	unique	GATC	DDB_G0294052	+	nad11	subunit of NADH dehydrogenase%2C which catalyzes the reaction NADH %2B H%3Csup%3E%2B%3C%2Fsup%3E %2B ubiquinone %3C%3D%3E NAD%3Csup%3E%2B%3C%2Fsup%3E %2B ubiquinol	NA	NA	NA	NA	NA	NA
DDB0169550	49736	GTAGATTTAATAATAGGATC	1	GATCAAAAATAAATAGTACA	1	unique	GATC	DDB_G0294052	+	nad11	subunit of NADH dehydrogenase%2C which catalyzes the reaction NADH %2B H%3Csup%3E%2B%3C%2Fsup%3E %2B ubiquinone %3C%3D%3E NAD%3Csup%3E%2B%3C%2Fsup%3E %2B ubiquinol	NA	NA	NA	NA	NA	NA
DDB0169550	51144	GGATTATATGAAAGAGGATC	1	GATCCACATAAAACAAGATT	1	unique	GATC	DDB_G0294026	+	nad5	NA	NA	NA	NA	NA	NA	NA
DDB0169550	51886	CTATTTTTAAGTGCCGGATC	1	GATCAGTAATACATGGATTA	1	unique	GATC	DDB_G0294026	+	nad5	NA	NA	NA	NA	NA	NA	NA
DDB0169550	52449	TTTTAATATAAAAGAAGATC	1	GATCGAATGATAAATGTAAA	1	unique	GATC	DDB_G0294026	+	nad5	NA	NA	NA	NA	NA	NA	NA
DDB0169550	53335	AAAGAGAGGGAAAAGGGATC	1	GATCAACAATTGAAAACAAC	1	unique	GATC	DDB_G0294046	+	mrps4	protein component of the small ribosomal subunit%3B involved in the transition of growth and development%3B ectopic expression of MRP4 in multiple human tumor cell lines suppressed cell proliferation through induction of apoptotic cell death	NA	NA	NA	NA	NA	NA
DDB0169550	54602	ACGAATCTGAAAGTGCGATC	1	GATCAAAGTATATAAAACAA	1	unique	GATC	DDB_G0294050	+	mrps2	protein component of the small ribosomal subunit	NA	NA	NA	NA	NA	NA
DDB0215018	173	ATTATGAGATGATATCGATC	27	GATCTCCTCTTGGGAGTCGT	27	not_unique	GATC	NA	NA	NA	NA	start	DDB_G0294144	NA	-	172	58402
DDB0215018	673	TTTTGGGTGTTGGGAGGATC	5	GATCATCTGTCATCTCATCT	17	not_unique	GATC	NA	NA	NA	NA	start	DDB_G0294144	NA	-	672	57902
DDB0215018	817	TGGCCAGATTTCATTTGATC	31	GATCGCCTATTTTGCATTCT	29	not_unique	GATC	NA	NA	NA	NA	start	DDB_G0294144	NA	-	816	57758
DDB0215018	1164	TCTTCTAACCCCATGAGATC	17	GATCCATTTTGGGGAATTCG	34	not_unique	GATC	NA	NA	NA	NA	start	DDB_G0294144	NA	-	1163	57411
DDB0215018	1441	GCGATTTGGTAAGTTAGATC	22	GATCTGTAGATCGTGGTGGA	30	not_unique	GATC	NA	NA	NA	NA	start	DDB_G0294144	NA	-	1440	57134
DDB0215018	1449	GTAAGTTAGATCTGTAGATC	24	GATCGTGGTGGATTGGTGAT	31	not_unique	GATC	NA	NA	NA	NA	start	DDB_G0294144	NA	-	1448	57126
DDB0215018	1553	TATCTTGTATCCTCTTGATC	29	GATCGCGGTACGGTTTTTTT	12	not_unique	GATC	NA	NA	NA	NA	start	DDB_G0294144	NA	-	1552	57022
DDB0215018	1622	TATCTTGTATCCTCTTGATC	29	GATCGCGGTACGGTTTTTTT	12	not_unique	GATC	NA	NA	NA	NA	start	DDB_G0294144	NA	-	1621	56953
DDB0215018	2632	AAATTTTCAATTAAATGATC	7	GATCAGTATCTGTTAATAAT	7	not_unique	GATC	NA	NA	NA	NA	start	DDB_G0294144	NA	-	2631	55943
DDB0215018	2792	ATTCAAGATTCTTAATGATC	10	GATCATTTCTTTAAAATCAA	7	not_unique	GATC	NA	NA	NA	NA	start	DDB_G0294144	NA	-	2791	55783
DDB0215018	3336	TGGTGACATTTGTGGTGATC	6	GATCGATTATAATATTGATT	6	not_unique	GATC	NA	NA	NA	NA	start	DDB_G0294144	NA	-	3335	55239
DDB0215018	3519	TTGACCAGTGTACATTGATC	6	GATCTACCTTTGATACGAAT	6	not_unique	GATC	NA	NA	NA	NA	start	DDB_G0294144	NA	-	3518	55056
DDB0215018	3796	TCAAAAGCATCTTTAAGATC	8	GATCTTCAATTATCTCCATT	9	not_unique	GATC	NA	NA	NA	NA	start	DDB_G0294144	NA	-	3795	54779
DDB0215018	5380	TAAACCAACAAAAACAGATC	3	GATCTTATTTATTCAATTGC	4	not_unique	GATC	NA	NA	NA	NA	start	DDB_G0294144	NA	-	5379	53195
DDB0215018	5486	ATTGTAGAATCAGTTGGATC	2	GATCAGATTATAAAAATTTC	2	not_unique	GATC	NA	NA	NA	NA	start	DDB_G0294144	NA	-	5485	53089
DDB0215018	5792	TATGAAATTAATGAAAGATC	2	GATCAACATTTAAACAATTA	2	not_unique	GATC	NA	NA	NA	NA	start	DDB_G0294144	NA	-	5791	52783
DDB0215018	6694	ATCAATCAATGAAAAGGATC	2	GATCCAATTAGTTTTATTAG	3	not_unique	GATC	NA	NA	NA	NA	start	DDB_G0294144	NA	-	6693	51881
DDB0215018	6713	CCAATTAGTTTTATTAGATC	2	GATCTTCTTTAAACTTTAAA	2	not_unique	GATC	NA	NA	NA	NA	start	DDB_G0294144	NA	-	6712	51862
DDB0215018	6835	ATCCACACTAACAAGTGATC	2	GATCAATCATCATATAAAAT	2	not_unique	GATC	NA	NA	NA	NA	start	DDB_G0294144	NA	-	6834	51740
DDB0215018	7186	ATTATATTATAATAAAGATC	2	GATCAATATTATCATTTTCT	2	not_unique	GATC	NA	NA	NA	NA	start	DDB_G0294144	NA	-	7185	51389
DDB0215018	7612	CTTGCGGTCAACCATTGATC	2	GATCAAGGTTTAATTAAAGT	2	not_unique	GATC	NA	NA	NA	NA	start	DDB_G0294144	NA	-	7611	50963
DDB0215018	9007	AATGTCATCAATAGGGGATC	2	GATCTTATAAGCAATAATCA	2	not_unique	GATC	NA	NA	NA	NA	start	DDB_G0294144	NA	-	9006	49568
DDB0215018	9151	AAATATTAAAGATGATGATC	2	GATCATAAATTCTATAGAAA	2	not_unique	GATC	NA	NA	NA	NA	start	DDB_G0294144	NA	-	9150	49424
DDB0215018	9298	TTAATCAACAAAAACAGATC	1	GATCTTATTTATTCAATTGC	4	unique_one	GATC	NA	NA	NA	NA	start	DDB_G0294144	NA	-	9297	49277
DDB0215018	9781	AGAAACGATATTAATAGATC	2	GATCCAGAAGATAATGATTT	2	not_unique	GATC	NA	NA	NA	NA	start	DDB_G0294144	NA	-	9780	48794
DDB0215018	10075	TAGTAAAACTAACCAGGATC	2	GATCACAAACAAATGATCAA	2	not_unique	GATC	NA	NA	NA	NA	start	DDB_G0294144	NA	-	10074	48500
DDB0215018	10089	AGGATCACAAACAAATGATC	2	GATCAATGATGATGATTTTG	2	not_unique	GATC	NA	NA	NA	NA	start	DDB_G0294144	NA	-	10088	48486
DDB0215018	10252	TAATTTTCCTTTTTCCGATC	2	GATCAAATATGCTCAGAGAA	2	not_unique	GATC	NA	NA	NA	NA	start	DDB_G0294144	NA	-	10251	48323
DDB0215018	10300	ATTCTCGCATTGTTTTGATC	2	GATCAAGAGAAAAAGATTAA	2	not_unique	GATC	NA	NA	NA	NA	start	DDB_G0294144	NA	-	10299	48275
DDB0215018	10327	AAAGATTAAATTCATTGATC	8	GATCAAATGATTGAAAGAAA	2	not_unique	GATC	NA	NA	NA	NA	start	DDB_G0294144	NA	-	10326	48248
DDB0215018	10517	CCAACCTATTATATTGGATC	2	GATCAATAGAGATGATAGAT	2	not_unique	GATC	NA	NA	NA	NA	start	DDB_G0294144	NA	-	10516	48058
DDB0215018	10570	TAGAAATTATTTTTTTGATC	2	GATCCACAATTTCCAAATTA	2	not_unique	GATC	NA	NA	NA	NA	start	DDB_G0294144	NA	-	10569	48005
DDB0215018	10684	ATCAATCACTGAAAAGGATC	2	GATCCAATTATATTTTTTGA	2	not_unique	GATC	NA	NA	NA	NA	start	DDB_G0294144	NA	-	10683	47891
DDB0215018	10720	ATCGCATTCAAGTGAAGATC	2	GATCAATTAGAATTTATAAA	2	not_unique	GATC	NA	NA	NA	NA	start	DDB_G0294144	NA	-	10719	47855
DDB0215018	10846	ATCATTACTTACAAGTGATC	2	GATCAATCATCTAAACAGTC	2	not_unique	GATC	NA	NA	NA	NA	start	DDB_G0294144	NA	-	10845	47729
DDB0215018	11131	ATTATTTAATGATGAAGATC	2	GATCGTTATTATCATTTTCT	2	not_unique	GATC	NA	NA	NA	NA	start	DDB_G0294144	NA	-	11130	47444
DDB0215018	11227	TATAAAAAATGATACTGATC	2	GATCTTGATAGATTATCATC	2	not_unique	GATC	NA	NA	NA	NA	start	DDB_G0294144	NA	-	11226	47348
DDB0215018	11354	TATCATTATGAATACCGATC	2	GATCGGTGTTAACACCCTTT	2	not_unique	GATC	NA	NA	NA	NA	start	DDB_G0294144	NA	-	11353	47221
DDB0215018	12782	TTATGGTAAAGGTCCAGATC	2	GATCCTACATTATTAGTGAA	2	not_unique	GATC	NA	NA	NA	NA	start	DDB_G0294144	NA	-	12781	45793
DDB0215018	12974	TGAACCAACAGTATGTGATC	2	GATCTTATTTATTCAATTAA	2	not_unique	GATC	NA	NA	NA	NA	start	DDB_G0294144	NA	-	12973	45601
DDB0215018	13043	AGAATTAAATCCACCAGATC	2	GATCCATCATCTTCATCATC	2	not_unique	GATC	NA	NA	NA	NA	start	DDB_G0294144	NA	-	13042	45532
DDB0215018	13137	ATTTTCAAAGCAACCAGATC	2	GATCAAACTATCCAATTGAA	2	not_unique	GATC	NA	NA	NA	NA	start	DDB_G0294144	NA	-	13136	45438
DDB0215018	14039	AAAGATTAAATTCATTGATC	8	GATCAATTGATTGAAAGAAA	4	not_unique	GATC	NA	NA	NA	NA	start	DDB_G0294144	NA	-	14038	44536
DDB0215018	14399	ATCAATCAATGAAAAAGATC	2	GATCCAATTGGTTTTATTAG	2	not_unique	GATC	NA	NA	NA	NA	start	DDB_G0294144	NA	-	14398	44176
DDB0215018	14690	TTCGTTTACGGTGTCAGATC	2	GATCAACCTTATTCAATGAG	2	not_unique	GATC	NA	NA	NA	NA	start	DDB_G0294144	NA	-	14689	43885
DDB0215018	14912	ATTATCATCATTAATTGATC	2	GATCTTGTTAACCATCTCAC	2	not_unique	GATC	NA	NA	NA	NA	start	DDB_G0294144	NA	-	14911	43663
DDB0215018	15575	CATTTGAACACAATATGATC	2	GATCTTTTAATGCATATTTA	7	not_unique	GATC	NA	NA	NA	NA	start	DDB_G0294144	NA	-	15574	43000
DDB0215018	16374	AACAGAATATCGCTGCGATC	2	GATCTTTGTTCCATATGATG	2	not_unique	GATC	NA	NA	NA	NA	start	DDB_G0294144	NA	-	16373	42201
DDB0215018	17178	TAAACCAACAGAAACAGATC	2	GATCTTTTTTATTCAATTAT	3	not_unique	GATC	NA	NA	NA	NA	start	DDB_G0294144	NA	-	17177	41397
DDB0215018	17342	TTTTAATATCATTGATGATC	2	GATCATAGTTATGAAGGTTA	2	not_unique	GATC	NA	NA	NA	NA	start	DDB_G0294144	NA	-	17341	41233
DDB0215018	17438	ATATGCTATCGATAAAGATC	2	GATCCTGGTTTTAATGAAAC	2	not_unique	GATC	NA	NA	NA	NA	start	DDB_G0294144	NA	-	17437	41137
DDB0215018	18030	ATTCTCACATTGTTTTGATC	2	GATCAAAAGAAAAAGATTAA	2	not_unique	GATC	NA	NA	NA	NA	start	DDB_G0294144	NA	-	18029	40545
DDB0215018	18057	AAAGATTAAATTTATTGATC	2	GATCAATTGATTGAAATAAA	2	not_unique	GATC	NA	NA	NA	NA	start	DDB_G0294144	NA	-	18056	40518
DDB0215018	18090	AAATACAAAAAATCCAGATC	2	GATCCCAATTTTCAAAATCA	2	not_unique	GATC	NA	NA	NA	NA	start	DDB_G0294144	NA	-	18089	40485
DDB0215018	18288	TAGAGATTATTTAATAGATC	2	GATCTGCAATTTCCAAATGG	2	not_unique	GATC	NA	NA	NA	NA	start	DDB_G0294144	NA	-	18287	40287
DDB0215018	19903	TGAGCCAACAGAAACAGATC	2	GATCTTATTTATTCAATTAT	2	not_unique	GATC	NA	NA	NA	NA	start	DDB_G0294144	NA	-	19902	38672
DDB0215018	20696	AGATTTAAATTTCATTGATC	1	GATCAATTGATTGAAAGAAA	4	unique_one	GATC	NA	NA	NA	NA	start	DDB_G0294144	NA	-	20695	37879
DDB0215018	21032	AACTTGACAATCCGTCGATC	2	GATCATTGAAAAGGATCCAA	2	not_unique	GATC	NA	NA	NA	NA	start	DDB_G0294144	NA	-	21031	37543
DDB0215018	21045	GTCGATCATTGAAAAGGATC	2	GATCCAATTCCTTTTATAAA	2	not_unique	GATC	NA	NA	NA	NA	start	DDB_G0294144	NA	-	21044	37530
DDB0215018	21168	CAATAATGATGAATTAGATC	2	GATCGTATACAATTATTAAT	2	not_unique	GATC	NA	NA	NA	NA	start	DDB_G0294144	NA	-	21167	37407
DDB0215018	21285	CAAATCAAATCTAATAGATC	2	GATCAAAGATCAAATAAACC	2	not_unique	GATC	NA	NA	NA	NA	start	DDB_G0294144	NA	-	21284	37290
DDB0215018	21292	AATCTAATAGATCAAAGATC	2	GATCAAATAAACCATATTCA	2	not_unique	GATC	NA	NA	NA	NA	start	DDB_G0294144	NA	-	21291	37283
DDB0215018	21435	TACACTAGATAGATTAGATC	2	GATCTCAACAACAACAACAA	2	not_unique	GATC	NA	NA	NA	NA	start	DDB_G0294144	NA	-	21434	37140
DDB0215018	22325	TTTCTTGAAGCTATATGATC	2	GATCTTTGTCAGCAAATGCA	2	not_unique	GATC	NA	NA	NA	NA	start	DDB_G0294144	NA	-	22324	36250
DDB0215018	22604	ATTGCAGCTCTACATTGATC	2	GATCGATATTAGTAACTGCA	2	not_unique	GATC	NA	NA	NA	NA	start	DDB_G0294144	NA	-	22603	35971
DDB0215018	24144	TACTCATAAATTTGATGATC	4	GATCATAAATATTCATATAC	4	not_unique	GATC	NA	NA	NA	NA	start	DDB_G0294144	NA	-	24143	34431
DDB0215018	24165	TAAATATTCATATACTGATC	4	GATCTCGGTGCTATGCGTAT	4	not_unique	GATC	NA	NA	NA	NA	start	DDB_G0294144	NA	-	24164	34410
DDB0215018	24363	AGTTTTAAATCCATCCGATC	4	GATCCATTTAATTATAGTGA	4	not_unique	GATC	NA	NA	NA	NA	start	DDB_G0294144	NA	-	24362	34212
DDB0215018	24706	AAATACTGGAAGATTAGATC	2	GATCAATCATCTATTACTGA	2	not_unique	GATC	NA	NA	NA	NA	start	DDB_G0294144	NA	-	24705	33869
DDB0215018	25165	TGGTTCTTCAAATACCGATC	4	GATCTTTTACTTCGTCAAGT	4	not_unique	GATC	NA	NA	NA	NA	start	DDB_G0294144	NA	-	25164	33410
DDB0215018	25400	AAATATAGTTTTAAGAGATC	4	GATCTTGCTGAAATCCATAA	4	not_unique	GATC	NA	NA	NA	NA	start	DDB_G0294144	NA	-	25399	33175
DDB0215018	25454	AAAAAATTTATATAAAGATC	4	GATCATTTCTTCCAAAGTTG	4	not_unique	GATC	NA	NA	NA	NA	start	DDB_G0294144	NA	-	25453	33121
DDB0215018	25734	CTTAATAGTGCATATAGATC	4	GATCAGTTGATTTAATTTTA	4	not_unique	GATC	NA	NA	NA	NA	start	DDB_G0294144	NA	-	25733	32841
DDB0215018	26277	ATTAATTGTGTAACAAGATC	2	GATCTCAAAAACATCTTGTT	2	not_unique	GATC	NA	NA	NA	NA	start	DDB_G0294144	NA	-	26276	32298
DDB0215018	26827	TTTGCAGTTTAAATCGGATC	2	GATCTAACCCTATAGGCTGA	2	not_unique	GATC	NA	NA	NA	NA	start	DDB_G0294144	NA	-	26826	31748
DDB0215018	29227	TACTCATAAATTTGATGATC	4	GATCATAAATATTCATATAC	4	not_unique	GATC	NA	NA	NA	NA	start	DDB_G0294144	NA	-	29226	29348
DDB0215018	29248	TAAATATTCATATACTGATC	4	GATCTCGGTGCTATGCGTAT	4	not_unique	GATC	NA	NA	NA	NA	start	DDB_G0294144	NA	-	29247	29327
DDB0215018	29446	AGTTTTAAATCCATCCGATC	4	GATCCATTTAATTATAGTGA	4	not_unique	GATC	NA	NA	NA	NA	start	DDB_G0294144	NA	-	29445	29129
DDB0215018	29773	AATTAGTGGAAGATTAGATC	2	GATCAAACATCTATCACTGA	2	not_unique	GATC	NA	NA	NA	NA	start	DDB_G0294144	NA	-	29772	28802
DDB0215018	30232	TGGTTCTTCAAATACCGATC	4	GATCTTTTACTTCGTCAAGT	4	not_unique	GATC	NA	NA	NA	NA	start	DDB_G0294144	NA	-	30231	28343
DDB0215018	30478	AAATATAGTTTTAAGAGATC	4	GATCTTGCTGAAATCCATAA	4	not_unique	GATC	NA	NA	NA	NA	start	DDB_G0294144	NA	-	30477	28097
DDB0215018	30532	AAAAAATTTATATAAAGATC	4	GATCATTTCTTCCAAAGTTG	4	not_unique	GATC	NA	NA	NA	NA	start	DDB_G0294144	NA	-	30531	28043
DDB0215018	30812	CTTAATAGTGCATATAGATC	4	GATCAGTTGATTTAATTTTA	4	not_unique	GATC	NA	NA	NA	NA	start	DDB_G0294144	NA	-	30811	27763
DDB0215018	33822	TTTTTTTTTTTTTTCTGATC	5	GATCAAACATTTTTTCTCAA	2	not_unique	GATC	NA	NA	NA	NA	start	DDB_G0294144	NA	-	33821	24753
DDB0215018	33999	AAGTTTGGAAGTACAAGATC	2	GATCAATATTATTCATTTGA	2	not_unique	GATC	NA	NA	NA	NA	start	DDB_G0294144	NA	-	33998	24576
DDB0215018	35208	CTATGAAAGTTTAGGTGATC	2	GATCTAGAATTAGAATTTAA	2	not_unique	GATC	NA	NA	NA	NA	start	DDB_G0294144	NA	-	35207	23367
DDB0215018	35667	ATTAGAAATACCAAATGATC	2	GATCCATATAATCCAAATAT	2	not_unique	GATC	NA	NA	NA	NA	start	DDB_G0294144	NA	-	35666	22908
DDB0215018	35976	TACAATTGAATTATCAGATC	2	GATCAACAATCATTCATAAT	2	not_unique	GATC	NA	NA	NA	NA	start	DDB_G0294144	NA	-	35975	22599
DDB0215018	37038	CACTAATGATAATGCTGATC	2	GATCAAGTTTTATCAAATTT	3	not_unique	GATC	NA	NA	NA	NA	start	DDB_G0294144	NA	-	37037	21537
DDB0215018	37404	AACACCAAAACCTGTAGATC	2	GATCCATCTAAAGATCCATC	2	not_unique	GATC	NA	NA	NA	NA	start	DDB_G0294144	NA	-	37403	21171
DDB0215018	37416	TGTAGATCCATCTAAAGATC	2	GATCCATCTGATGAACTTTC	5	not_unique	GATC	NA	NA	NA	NA	start	DDB_G0294144	NA	-	37415	21159
DDB0215018	38005	TACATCACCAATACTAGATC	2	GATCTAATAATAAAAGATTC	2	not_unique	GATC	NA	NA	NA	NA	start	DDB_G0294144	NA	-	38004	20570
DDB0215018	39062	TATAGTAGTAATACAAGATC	2	GATCATTACCACAAATTAAT	2	not_unique	GATC	NA	NA	NA	NA	start	DDB_G0294144	NA	-	39061	19513
DDB0215018	39592	TGCTATAAATGATAATGATC	2	GATCATTCAAATTTTGGTTT	2	not_unique	GATC	NA	NA	NA	NA	start	DDB_G0294144	NA	-	39591	18983
DDB0215018	39910	CCCATCTTGTTCAATTGATC	2	GATCAGTCAGGTTTAATTTC	2	not_unique	GATC	NA	NA	NA	NA	start	DDB_G0294144	NA	-	39909	18665
DDB0215018	40656	TACATTAGAATTTGATGATC	2	GATCCTAAATTCAAAATTCA	2	not_unique	GATC	NA	NA	NA	NA	start	DDB_G0294144	NA	-	40655	17919
DDB0215018	41302	TATTATTATTATTTAAGATC	2	GATCATTGAAATTAAACTAT	2	not_unique	GATC	NA	NA	NA	NA	start	DDB_G0294144	NA	-	41301	17273
DDB0215018	41343	AAATGATAATGATGTCGATC	2	GATCATTCATATAGTATACC	2	not_unique	GATC	NA	NA	NA	NA	start	DDB_G0294144	NA	-	41342	17232
DDB0215018	41523	AACAATTGGTAATGATGATC	2	GATCCAGTAATTGAATCAAT	2	not_unique	GATC	NA	NA	NA	NA	start	DDB_G0294144	NA	-	41522	17052
DDB0215018	44529	TTAGAACCTCCAATTGGATC	2	GATCATTAATGGGATACGTA	2	not_unique	GATC	NA	NA	NA	NA	start	DDB_G0294144	NA	-	44528	14046
DDB0215018	45553	ACCTCAAATGATATTCGATC	2	GATCCAGCAACAGGACAATA	2	not_unique	GATC	NA	NA	NA	NA	start	DDB_G0294144	NA	-	45552	13022
DDB0215018	47098	TGTATTGATATCAACAGATC	2	GATCTCCAACTTGCATACTT	2	not_unique	GATC	NA	NA	NA	NA	start	DDB_G0294144	NA	-	47097	11477
DDB0215018	47316	TTTGCTTTACCGGCACGATC	2	GATCTTGAGTATCAGCAAAT	2	not_unique	GATC	NA	NA	NA	NA	start	DDB_G0294144	NA	-	47315	11259
DDB0215018	47396	TTCTTCATCTAATCTTGATC	2	GATCCTAATTTTGCTTTATC	2	not_unique	GATC	NA	NA	NA	NA	start	DDB_G0294144	NA	-	47395	11179
DDB0215018	47501	CTTACAGCATCACCTTGATC	2	GATCTAAAATTTTAACAATT	2	not_unique	GATC	NA	NA	NA	NA	start	DDB_G0294144	NA	-	47500	11074
DDB0215018	48343	ATATGATTTAACCAATGATC	2	GATCCTTGTACACCTAATGG	2	not_unique	GATC	NA	NA	NA	NA	start	DDB_G0294144	NA	-	48342	10232
DDB0215018	48362	CCTTGTACACCTAATGGATC	2	GATCTTGATTAATTGCAATG	2	not_unique	GATC	NA	NA	NA	NA	start	DDB_G0294144	NA	-	48361	10213
DDB0215018	48416	ATTGATAATGTCTCTTGATC	2	GATCAATATCAATCAAGTCA	2	not_unique	GATC	NA	NA	NA	NA	start	DDB_G0294144	NA	-	48415	10159
DDB0215018	48971	TTTGGGAAATTAGTTGGATC	2	GATCACTTAAAAAAAAAAAA	4	not_unique	GATC	NA	NA	NA	NA	start	DDB_G0294144	NA	-	48970	9604
DDB0215018	51821	AAATGAATTCAAATTTGATC	2	GATCAATCAGGAAAATATTT	2	not_unique	GATC	NA	NA	NA	NA	start	DDB_G0294144	NA	-	51820	6754
DDB0215018	53066	ATTATTCGTATCTGTGGATC	2	GATCCATGTATCTATGCTTT	2	not_unique	GATC	NA	NA	NA	NA	start	DDB_G0294144	NA	-	53065	5509
DDB0215018	53188	AATATATGCTTCCTGTGATC	2	GATCTTATCAGTTATGATTG	2	not_unique	GATC	NA	NA	NA	NA	start	DDB_G0294144	NA	-	53187	5387
DDB0215018	53305	AACCTCCAAAATCAATGATC	2	GATCAAATTGGGTGTAGTCG	2	not_unique	GATC	NA	NA	NA	NA	start	DDB_G0294144	NA	-	53304	5270
DDB0215018	53450	ACGTCCAAGACCACTCGATC	2	GATCCAAATAGGAAGGATGC	2	not_unique	GATC	NA	NA	NA	NA	start	DDB_G0294144	NA	-	53449	5125
DDB0215018	53675	TGGCTACGCTCCTGCTGATC	2	GATCCAAGAATGACCTATGA	2	not_unique	GATC	NA	NA	NA	NA	start	DDB_G0294144	NA	-	53674	4900
DDB0215018	53761	ACCTTAAAAAAGAAGAGATC	2	GATCGAAACAATGTATATCG	2	not_unique	GATC	NA	NA	NA	NA	start	DDB_G0294144	NA	-	53760	4814
DDB0215018	53780	CGAAACAATGTATATCGATC	2	GATCTTAGACCCTATATGAA	2	not_unique	GATC	NA	NA	NA	NA	start	DDB_G0294144	NA	-	53779	4795
DDB0215018	53930	TATTGTAACAAGAAAAGATC	3	GATCTTTTATAAAAATTAAA	3	not_unique	GATC	NA	NA	NA	NA	start	DDB_G0294144	NA	-	53929	4645
DDB0215018	54101	AAAGGTAAGATTGATTGATC	2	GATCACCTTATTTTTTTTTT	2	not_unique	GATC	NA	NA	NA	NA	start	DDB_G0294144	NA	-	54100	4474
DDB0215018	54393	CTTTTATAGTACTCGGGATC	2	GATCTCGGTATGTTTTGGCG	3	not_unique	GATC	NA	NA	NA	NA	start	DDB_G0294144	NA	-	54392	4182
DDB0215018	54474	ACAATCCTTGCTTTTTGATC	3	GATCTACCTTTTTAATTTTT	2	not_unique	GATC	NA	NA	NA	NA	start	DDB_G0294144	NA	-	54473	4101
DDB0215018	55113	AAGCATCAAAGTCGCTGATC	2	GATCAGGTTTTTTTTTTTTT	2	not_unique	GATC	NA	NA	NA	NA	start	DDB_G0294144	NA	-	55112	3462
DDB0215018	55821	AACTTAGTAAGGTAGAGATC	2	GATCATTGATTTCGCCAAGA	2	not_unique	GATC	NA	NA	NA	NA	start	DDB_G0294144	NA	-	55820	2754
DDB0215018	55871	ATTCCACCAGAGATTGGATC	2	GATCATTGGCAACATTGAAG	2	not_unique	GATC	NA	NA	NA	NA	start	DDB_G0294144	NA	-	55870	2704
DDB0215018	55929	AGTTATTCTACACACCGATC	2	GATCACACCAAACATTGGAG	2	not_unique	GATC	NA	NA	NA	NA	start	DDB_G0294144	NA	-	55928	2646
DDB0215018	56148	AATCGTTGCCTTCAGAGATC	2	GATCAGCGGTTGGGTGAAGT	2	not_unique	GATC	NA	NA	NA	NA	start	DDB_G0294144	NA	-	56147	2427
DDB0215018	56217	CATTCTTGCCAAATCAGATC	2	GATCTGTTTGTTGGGTTTGC	2	not_unique	GATC	NA	NA	NA	NA	start	DDB_G0294144	NA	-	56216	2358
DDB0215018	56484	ACCCACAACTCAAAGAGATC	2	GATCCCATACGATATCGCCA	2	not_unique	GATC	NA	NA	NA	NA	start	DDB_G0294144	NA	-	56483	2091
DDB0215018	56527	CAATCTTCAAAAATTGGATC	2	GATCTCTTTGGTAACAACAT	2	not_unique	GATC	NA	NA	NA	NA	start	DDB_G0294144	NA	-	56526	2048
DDB0215018	56596	CAATCTTCAAACTTTAGATC	2	GATCTTCGTCAAAACAAACT	2	not_unique	GATC	NA	NA	NA	NA	start	DDB_G0294144	NA	-	56595	1979
DDB0215018	57038	ATCTTGTACTAAAATTGATC	2	GATCTTTCACATAATATGTT	2	not_unique	GATC	NA	NA	NA	NA	start	DDB_G0294144	NA	-	57037	1537
DDB0215018	58210	CTAAGATACCTTTACAGATC	2	GATCAGATTTAAAACAAATT	2	not_unique	GATC	NA	NA	NA	NA	start	DDB_G0294144	NA	-	58209	365
DDB0215018	59072	GCTTTGGCATCGACCGGATC	7	GATCAATTCTACATGTAGAT	8	not_unique	GATC	DDB_G0294144	-	DDB_G0294144_RTE	ORF1 encoding GAG and protease (PRO) proteins of long terminal repeat retrotransposon Skipper%3B refer to AF049230 for consensus element	NA	NA	NA	NA	NA	NA
DDB0215018	59498	ATTATTATCTAAAATTGATC	10	GATCTTAGATACTCTAATTG	8	not_unique	GATC	DDB_G0294144	-	DDB_G0294144_RTE	ORF1 encoding GAG and protease (PRO) proteins of long terminal repeat retrotransposon Skipper%3B refer to AF049230 for consensus element	NA	NA	NA	NA	NA	NA
DDB0215018	59693	TGGAACCAAAGTCTTGGATC	6	GATCTAAAGTTACGGTGTAT	3	not_unique	GATC	DDB_G0294144	-	DDB_G0294144_RTE	ORF1 encoding GAG and protease (PRO) proteins of long terminal repeat retrotransposon Skipper%3B refer to AF049230 for consensus element	NA	NA	NA	NA	NA	NA
DDB0215018	62082	ACGTTGTCAGAAGATGGATC	1	GATCGTTGGAAATAAAATGA	1	unique	GATC	NA	NA	NA	NA	DDB_G0294146	DDB_G0294164	-	-	1908	5780
DDB0215018	62666	CTTCTCATCTTTTTCAGATC	1	GATCTGAATCACTTATTAAT	1	unique	GATC	NA	NA	NA	NA	DDB_G0294146	DDB_G0294164	-	-	2492	5196
DDB0215018	62711	ATTGCATCTATAATCTGATC	1	GATCAGCTTGAGCATTTAAT	1	unique	GATC	NA	NA	NA	NA	DDB_G0294146	DDB_G0294164	-	-	2537	5151
DDB0215018	62903	ACTACTATCTAAAATTGATC	1	GATCTTATATACTCTAATTA	1	unique	GATC	NA	NA	NA	NA	DDB_G0294146	DDB_G0294164	-	-	2729	4959
DDB0215018	63263	TACAATTATTCGAGACGATC	1	GATCCAAATAATTAGTTTCA	1	unique	GATC	NA	NA	NA	NA	DDB_G0294146	DDB_G0294164	-	-	3089	4599
DDB0215018	64008	GGTTTTTAATAAAAAAGATC	36	GATCTAATTTTAGAACAAAA	21	not_unique	GATC	NA	NA	NA	NA	DDB_G0294146	DDB_G0294164	-	-	3834	3854
DDB0215018	64125	TGATAGAGGGTCGGGGGATC	29	GATCGAATCCCTTTTGGTAA	34	not_unique	GATC	NA	NA	NA	NA	DDB_G0294146	DDB_G0294164	-	-	3951	3737
DDB0215018	64390	CTTCGCTGTGTAGTTCGATC	1	GATCCAGAATAATTTTAAAC	1	unique	GATC	NA	NA	NA	NA	DDB_G0294146	DDB_G0294164	-	-	4216	3472
DDB0215018	64674	CATTTGACCTCCTTTTGATC	1	GATCAAAAGGTGGTATATTA	1	unique	GATC	NA	NA	NA	NA	DDB_G0294146	DDB_G0294164	-	-	4500	3188
DDB0215018	64751	GATGATTCTTTATACTGATC	2	GATCATAGAGAAGCCAAACG	1	unique_one	GATC	NA	NA	NA	NA	DDB_G0294146	DDB_G0294164	-	-	4577	3111
DDB0215018	64949	ACTGGTCTACATTCGAGATC	1	GATCAATTTACTCATCATAA	2	unique_one	GATC	NA	NA	NA	NA	DDB_G0294146	DDB_G0294164	-	-	4775	2913
DDB0215018	65790	GGTTTTTAATAAAAAAGATC	36	GATCTAATTTTAGAACAAAA	21	not_unique	GATC	NA	NA	NA	NA	DDB_G0294146	DDB_G0294164	-	-	5616	2072
DDB0215018	65907	TGATAGAGGGTCGGGGGATC	29	GATCGAATCCCTTTTGGTAA	34	not_unique	GATC	NA	NA	NA	NA	DDB_G0294146	DDB_G0294164	-	-	5733	1955
DDB0215018	66280	AATGAAATCAATGGAGGATC	24	GATCAAATCAACAACATTTC	2	not_unique	GATC	NA	NA	NA	NA	DDB_G0294146	DDB_G0294164	-	-	6106	1582
DDB0215018	67104	ATGCCTGTCTCAGCAAGATC	1	GATCTATGAGAGAGAATGGG	1	unique	GATC	NA	NA	NA	NA	DDB_G0294146	DDB_G0294164	-	-	6930	758
DDB0215018	67836	TTCGACCTTGCGCAATGATC	24	GATCGCGTCATTGTGCCGGT	38	not_unique	GATC	NA	NA	NA	NA	DDB_G0294146	DDB_G0294164	-	-	7662	26
DDB0215018	69100	AATGAAATCAATGGAGGATC	24	GATCAAATCAACAACCTTTC	31	not_unique	GATC	NA	NA	NA	NA	DDB_G0294164	DDB_G0294168	-	+	792	198
DDB0215018	69958	TATGTAAGATTTTGGTGATC	9	GATCAGTGTAGATTGAAACC	10	not_unique	GATC	NA	NA	NA	NA	DDB_G0294168	DDB_G0294170	+	+	318	1192
DDB0215018	70954	ATCAAAATTTCCAGTTGATC	2	GATCACAAAGAATATCTCAC	2	not_unique	GATC	NA	NA	NA	NA	DDB_G0294168	DDB_G0294170	+	+	1314	196
DDB0215018	71541	AAAAAAAGATTAAAACGATC	1	GATCGAAGAAAATATAGAGG	2	unique_one	GATC	NA	NA	NA	NA	DDB_G0294170	DDB_G0294176	+	-	53	3221
DDB0215018	71644	GCCAAATCAAGAGAATGATC	1	GATCTCGAACAAATATCCAC	1	unique	GATC	NA	NA	NA	NA	DDB_G0294170	DDB_G0294176	+	-	156	3118
DDB0215018	72290	TGTAACTTTTCTTCCTGATC	10	GATCTTGTTGTTTTAATTTG	3	not_unique	GATC	NA	NA	NA	NA	DDB_G0294170	DDB_G0294176	+	-	802	2472
DDB0215018	72318	TTAATTTGTAAACTAAGATC	11	GATCAAGTTCATCATCATCA	10	not_unique	GATC	NA	NA	NA	NA	DDB_G0294170	DDB_G0294176	+	-	830	2444
DDB0215018	72520	GAAATGTTGTTGATTTGATC	2	GATCCTCCATTGATTTCATT	24	not_unique	GATC	NA	NA	NA	NA	DDB_G0294170	DDB_G0294176	+	-	1032	2242
DDB0215018	72908	TTCGACCTTGCGCAATGATC	24	GATCGCGTCATTGTGCCGGT	38	not_unique	GATC	NA	NA	NA	NA	DDB_G0294170	DDB_G0294176	+	-	1420	1854
DDB0215018	73149	ATTCTTGTAATGAATAGATC	1	GATCATTAACAATATCAGTT	22	unique_one	GATC	NA	NA	NA	NA	DDB_G0294170	DDB_G0294176	+	-	1661	1613
DDB0215018	73627	AGCGATTAGCCTAGGAGATC	2	GATCTAGAAGTGTTTAAACT	2	not_unique	GATC	NA	NA	NA	NA	DDB_G0294170	DDB_G0294176	+	-	2139	1135
DDB0215018	73668	GCTGGGTTACTTTATTGATC	2	GATCGGCATCCCCTTTATTA	2	not_unique	GATC	NA	NA	NA	NA	DDB_G0294170	DDB_G0294176	+	-	2180	1094
DDB0215018	73807	ATTTGGCTTGTTGTCTGATC	1	GATCATTATGGGGAAATAAC	1	unique	GATC	NA	NA	NA	NA	DDB_G0294170	DDB_G0294176	+	-	2319	955
DDB0215018	74087	TGAAGGATAACCGAGCGATC	2	GATCCCATACCAGTAGGTTT	2	not_unique	GATC	NA	NA	NA	NA	DDB_G0294170	DDB_G0294176	+	-	2599	675
DDB0215018	75075	GAAAGGTTGTTGATTTGATC	31	GATCCTCCATTGATTTCATT	24	not_unique	GATC	DDB_G0294176	-	DDB_G0294176_RTE	ORF1 protein fragment of DIRS1 retrotransposon%3B refer to Genbank M11339 for full-length element	NA	NA	NA	NA	NA	NA
DDB0215018	75466	TCGACCTTGCGGTAATGATC	1	GATCCCGTCATTGTGCCGGT	1	unique	GATC	NA	NA	NA	NA	DDB_G0294176	DDB_G0294178	-	+	298	909
DDB0215018	76354	ATCAAAATTTCCAGTTGATC	2	GATCACAAAGAATATCTCAC	2	not_unique	GATC	NA	NA	NA	NA	DDB_G0294176	DDB_G0294178	-	+	1186	21
DDB0215018	77179	AAAAAAACATTAAAACGATC	1	GATCGAAGAAAATATAGAGG	2	unique_one	GATC	NA	NA	NA	NA	DDB_G0294178	DDB_G0294180	+	+	40	805
DDB0215018	78083	AATGAAATCAATGGAAGATC	6	GATCAAATCAACAACCTTTC	31	not_unique	GATC	DDB_G0294180	+	DDB_G0294180_RTE	ORF1%2FORF3 protein fusion fragment of DIRS1 retrotransposon%3B refer to Genbank M11339 for full-length element	NA	NA	NA	NA	NA	NA
DDB0215018	78679	TACTCTTACCAATTAAGATC	20	GATCAAGGATACACCAAAGA	19	not_unique	GATC	DDB_G0294180	+	DDB_G0294180_RTE	ORF1%2FORF3 protein fusion fragment of DIRS1 retrotransposon%3B refer to Genbank M11339 for full-length element	NA	NA	NA	NA	NA	NA
DDB0215018	78891	AGTGGGAGTAATGGCCGATC	21	GATCTAACAACTTCAATGGA	22	not_unique	GATC	DDB_G0294180	+	DDB_G0294180_RTE	ORF1%2FORF3 protein fusion fragment of DIRS1 retrotransposon%3B refer to Genbank M11339 for full-length element	NA	NA	NA	NA	NA	NA
DDB0215018	78909	TCTAACAACTTCAATGGATC	22	GATCACCAAGTAATGTTGCA	17	not_unique	GATC	DDB_G0294180	+	DDB_G0294180_RTE	ORF1%2FORF3 protein fusion fragment of DIRS1 retrotransposon%3B refer to Genbank M11339 for full-length element	NA	NA	NA	NA	NA	NA
DDB0215018	79444	CCTCCACGTATTAGTAGATC	4	GATCCACAATACAGAGACTT	11	not_unique	GATC	DDB_G0294180	+	DDB_G0294180_RTE	ORF1%2FORF3 protein fusion fragment of DIRS1 retrotransposon%3B refer to Genbank M11339 for full-length element	NA	NA	NA	NA	NA	NA
DDB0215018	79612	CATCGCTTACTTGGACGATC	17	GATCTATTAATCGTAGGTTC	3	not_unique	GATC	DDB_G0294180	+	DDB_G0294180_RTE	ORF1%2FORF3 protein fusion fragment of DIRS1 retrotransposon%3B refer to Genbank M11339 for full-length element	NA	NA	NA	NA	NA	NA
DDB0215018	80759	TTTTTCTTCGTTTATTGATC	2	GATCCATATATTTTAATAAA	2	not_unique	GATC	NA	NA	NA	NA	DDB_G0294180	DDB_G0294190	+	+	1041	3339
DDB0215018	81512	GATTTTGAAATTTTAAGATC	7	GATCTTTAATCAATTATTTA	2	not_unique	GATC	NA	NA	NA	NA	DDB_G0294180	DDB_G0294190	+	+	1794	2586
DDB0215018	82240	ATTGGTTTCCGGTTATGATC	2	GATCTAACTATGGATGAGGA	2	not_unique	GATC	NA	NA	NA	NA	DDB_G0294180	DDB_G0294190	+	+	2522	1858
DDB0215018	82375	TTATTCAGCATTGTTTGATC	2	GATCCTGATAATTCAGGTCA	2	not_unique	GATC	NA	NA	NA	NA	DDB_G0294180	DDB_G0294190	+	+	2657	1723
DDB0215018	82432	AAAAAATGAACTTGAAGATC	2	GATCCTGATTTTGTAGAACC	2	not_unique	GATC	NA	NA	NA	NA	DDB_G0294180	DDB_G0294190	+	+	2714	1666
DDB0215018	82623	CAGAATTAAATCAAATGATC	9	GATCAATTCATTCATTACAA	4	not_unique	GATC	NA	NA	NA	NA	DDB_G0294180	DDB_G0294190	+	+	2905	1475
DDB0215018	82690	TATTAGTACAAAAGAAGATC	2	GATCCAATTGATTATGATGC	2	not_unique	GATC	NA	NA	NA	NA	DDB_G0294180	DDB_G0294190	+	+	2972	1408
DDB0215018	82726	TTATTATGATGAAGGTGATC	2	GATCTTCAAACTTTTATGAA	2	not_unique	GATC	NA	NA	NA	NA	DDB_G0294180	DDB_G0294190	+	+	3008	1372
DDB0215018	86472	GTTCATTTACAAAAATGATC	1	GATCATATTTCGTCTAGAAA	1	unique	GATC	DDB_G0294192	+	DDB_G0294192	NA	NA	NA	NA	NA	NA	NA
DDB0215018	87154	TCCAAAACATTTAATAGATC	1	GATCAAGATTATATTTTATT	1	unique	GATC	DDB_G0294192	+	DDB_G0294192	NA	NA	NA	NA	NA	NA	NA
DDB0215018	87330	AATTCTTCAACATTTAGATC	1	GATCCAATAATTCAATTATT	1	unique	GATC	DDB_G0294192	+	DDB_G0294192	NA	NA	NA	NA	NA	NA	NA
DDB0215018	88039	TTTTATTTTTACGTACGATC	1	GATCTTTAATATTATACATT	1	unique	GATC	NA	NA	NA	NA	DDB_G0294192	DDB_G0294194	+	-	380	128
DDB0215018	88556	AATTTAAAAGAAATATGATC	1	GATCTATATCATATTGAACT	1	unique	GATC	DDB_G0294194	-	DDB_G0294194	NA	NA	NA	NA	NA	NA	NA
DDB0215018	88760	TGGAATACTTTAAAATGATC	1	GATCATAAATGTCGGGACTA	1	unique	GATC	DDB_G0294194	-	DDB_G0294194	NA	NA	NA	NA	NA	NA	NA
DDB0215018	90653	GTCTCTTCTTCATTTTGATC	1	GATCATCATAAGATTCAATT	1	unique	GATC	DDB_G0294196	-	DDB_G0294196	NA	NA	NA	NA	NA	NA	NA
DDB0215018	90701	TCTGAATCGTCAGATAGATC	1	GATCATATTCATTTGTATTA	1	unique	GATC	DDB_G0294196	-	DDB_G0294196	NA	NA	NA	NA	NA	NA	NA
DDB0215018	91001	CCAACAATAATTATTGGATC	1	GATCTGTATTAGCACTGATT	1	unique	GATC	NA	NA	NA	NA	DDB_G0294196	DDB_G0294198	-	+	204	1347
DDB0215018	91760	ATTAAAAAATACAATTGATC	1	GATCCTAAATCTCTCTTTTG	1	unique	GATC	NA	NA	NA	NA	DDB_G0294196	DDB_G0294198	-	+	963	588
DDB0215018	92874	GGTAATTAAAGAGGCAGATC	1	GATCGTATTACTCAAGAAAG	1	unique	GATC	NA	NA	NA	NA	DDB_G0294198	DDB_G0294200	+	+	62	60
DDB0215018	93138	AGGAATTTCTGTAGTTGATC	1	GATCTCGATGATGGTAGAGG	1	unique	GATC	DDB_G0294200	+	DDB_G0294200	NA	NA	NA	NA	NA	NA	NA
DDB0215018	93373	TGTCATAAACAGAGTGGATC	1	GATCAGGTTGTGGATCAGGT	1	unique	GATC	DDB_G0294200	+	DDB_G0294200	NA	NA	NA	NA	NA	NA	NA
DDB0215018	93385	AGTGGATCAGGTTGTGGATC	1	GATCAGGTACTTGTGGTGGT	1	unique	GATC	DDB_G0294200	+	DDB_G0294200	NA	NA	NA	NA	NA	NA	NA
DDB0215018	93491	TGAGAGTGGTTGTGATGATC	1	GATCCATTTGAAAATCGGTC	1	unique	GATC	DDB_G0294200	+	DDB_G0294200	NA	NA	NA	NA	NA	NA	NA
DDB0215018	94592	TGGTTAGATTTATTTGGATC	1	GATCTTCAAAAATTGGTAAA	1	unique	GATC	NA	NA	NA	NA	DDB_G0294200	DDB_G0294202	+	+	150	238
DDB0215018	94711	AATGTTATTATTTAAAGATC	1	GATCAAGCAAATAGTTTAAT	1	unique	GATC	NA	NA	NA	NA	DDB_G0294200	DDB_G0294202	+	+	269	119
DDB0215018	95328	ACCGGCACAATGACGCGATC	38	GATCATTGCACAAGGTCGAA	5	not_unique	GATC	NA	NA	NA	NA	DDB_G0294202	DDB_G0294204	+	+	51	291
DDB0215018	95718	AATGAAATCAATGGAGGATC	24	GATCAAATCAACAACCTTTC	31	not_unique	GATC	DDB_G0294204	+	DDB_G0294204_RTE	partial ORF1 protein of DIRS1 retrotransposon%3B refer to Genbank M11339 for full-length element	NA	NA	NA	NA	NA	NA
DDB0215018	96177	ACCGGCACAATGATGCGATC	2	GATCATTGAGCAAGGTCGAA	3	not_unique	GATC	NA	NA	NA	NA	DDB_G0294204	DDB_G0294206	+	+	191	36
DDB0215018	96248	AATGAAATCAATGGAAGATC	6	GATCAAATCAACAACCTTTC	31	not_unique	GATC	DDB_G0294206	+	DDB_G0294206_RTE	ORF1 protein fragment of DIRS1 retrotransposon%3B refer to Genbank M11339 for full-length element	NA	NA	NA	NA	NA	NA
DDB0215018	97356	TTACTTGAGAATAACGGATC	2	GATCATTATCTGAAATAATT	2	not_unique	GATC	NA	NA	NA	NA	DDB_G0294206	DDB_G0294210	+	-	643	1415
DDB0215018	97407	AATGTAAACATAACTTGATC	2	GATCTTGTAACAATGGAAAA	1	unique_one	GATC	NA	NA	NA	NA	DDB_G0294206	DDB_G0294210	+	-	694	1364
DDB0215018	97846	TTTTCTTTTAAGCATTGATC	1	GATCTAATGGATAAGTGTTT	2	unique_one	GATC	NA	NA	NA	NA	DDB_G0294206	DDB_G0294210	+	-	1133	925
DDB0215018	98311	TTCTTTGACCTGATGGGATC	2	GATCGTAAATATATTTTTGA	2	not_unique	GATC	NA	NA	NA	NA	DDB_G0294206	DDB_G0294210	+	-	1598	460
DDB0215018	98586	AGTTATTTGTTGTTCCGATC	2	GATCCATCGACCACCATTGT	1	unique_one	GATC	NA	NA	NA	NA	DDB_G0294206	DDB_G0294210	+	-	1873	185
DDB0215018	99108	CGGAAACCAAGTTGCTGATC	1	GATCTCCAGATTGGGAAGAT	23	unique_one	GATC	DDB_G0294210	-	DDB_G0294210_RTE	ORF2 protein fragment of DIRS1 retrotransposon%3B refer to Genbank M11339 for full-length element	NA	NA	NA	NA	NA	NA
DDB0215018	99125	ATCTCCAGATTGGGAAGATC	23	GATCAGTATTATAGAAACCT	19	not_unique	GATC	DDB_G0294210	-	DDB_G0294210_RTE	ORF2 protein fragment of DIRS1 retrotransposon%3B refer to Genbank M11339 for full-length element	NA	NA	NA	NA	NA	NA
DDB0215018	99304	AGGTGAGATGCGAACAGATC	19	GATCCATCTGTATTTGACCG	23	not_unique	GATC	NA	NA	NA	NA	DDB_G0294210	DDB_G0294212	-	+	83	2267
DDB0215018	99629	AGTGGGAGTAATGGCCGATC	21	GATCTAACAACTTCAATGGA	22	not_unique	GATC	NA	NA	NA	NA	DDB_G0294210	DDB_G0294212	-	+	408	1942
DDB0215018	99647	TCTAACAACTTCAATGGATC	22	GATCACCAAGTAGTGTTGCA	5	not_unique	GATC	NA	NA	NA	NA	DDB_G0294210	DDB_G0294212	-	+	426	1924
DDB0215018	99990	TTCGACCTTGCGCAATGATC	24	GATCGCGTCATTGTGCCGGT	38	not_unique	GATC	NA	NA	NA	NA	DDB_G0294210	DDB_G0294212	-	+	769	1581
DDB0215018	100503	TCGAACAGAACTGAGAGATC	17	GATCTTGTATCTGGCCACCC	1	unique_one	GATC	NA	NA	NA	NA	DDB_G0294210	DDB_G0294212	-	+	1282	1068
DDB0215018	100582	TATCGCTTAATTGGACGATC	1	GATCTATTAATCGTCGGTTC	22	unique_one	GATC	NA	NA	NA	NA	DDB_G0294210	DDB_G0294212	-	+	1361	989
DDB0215018	101174	TTACCAAAAGGGATTCGATC	34	GATCCCCCGACCCTTTATCA	1	unique_one	GATC	NA	NA	NA	NA	DDB_G0294210	DDB_G0294212	-	+	1953	397
DDB0215018	101631	ACCACAAATTAAGAAGGATC	1	GATCTACATGAAAATGAACA	1	unique	GATC	DDB_G0294212	+	DDB_G0294212_RTE	fragment of ORF1 encoding an amino-terminal domain of unknown function of long terminal repeat retrotransposon DGLT-B%3B refer to AF474004 for full-length consensus element	NA	NA	NA	NA	NA	NA
DDB0215018	102095	AATGTTTATGAAATCAGATC	1	GATCAAGAATTCACTATTTG	1	unique	GATC	DDB_G0294214	+	DDB_G0294214	NA	NA	NA	NA	NA	NA	NA
DDB0215018	102342	CTAATCTCGAAGCTTAGATC	1	GATCTTGAAGTGGAACAAAG	1	unique	GATC	NA	NA	NA	NA	DDB_G0294214	DDB_G0294216	+	+	129	532
DDB0215018	102519	ACCAATGGTTCACATGGATC	1	GATCAGAAAATCGGTACAAA	1	unique	GATC	NA	NA	NA	NA	DDB_G0294214	DDB_G0294216	+	+	306	355
DDB0215018	102749	CACTCTTACCAATTAAGATC	1	GATCAAGGATACACCAAAGA	19	unique_one	GATC	NA	NA	NA	NA	DDB_G0294214	DDB_G0294216	+	+	536	125
DDB0215018	102961	AGTGGGAGTAATGGCCGATC	21	GATCTAACAACTTCAATGGA	22	not_unique	GATC	DDB_G0294216	+	DDB_G0294216_RTE	ORF2 protein fragment of DIRS1 retrotransposon%3B refer to Genbank M11339 for full-length element	NA	NA	NA	NA	NA	NA
DDB0215018	102979	TCTAACAACTTCAATGGATC	22	GATCACCAAGTAATGTTGCA	17	not_unique	GATC	DDB_G0294216	+	DDB_G0294216_RTE	ORF2 protein fragment of DIRS1 retrotransposon%3B refer to Genbank M11339 for full-length element	NA	NA	NA	NA	NA	NA
DDB0215018	103674	GAAAGATTGTTGATTTGATC	1	GATCCTCCATTGATTTCATT	24	unique_one	GATC	DDB_G0294218	-	DDB_G0294218_RTE	ORF1 protein fragment of DIRS1 retrotransposon%3B refer to Genbank M11339 for full-length element	NA	NA	NA	NA	NA	NA
DDB0215018	104064	TTCGACCTTACACAATGATC	10	GATCGCGTCATTGTGCCGGT	38	not_unique	GATC	NA	NA	NA	NA	DDB_G0294218	DDB_G0294220	-	+	294	155
DDB0215018	104311	TTCTTGATGAAATGAAGATC	2	GATCGTTAAGGAAATTTCGA	1	unique_one	GATC	DDB_G0294220	+	DDB_G0294220	NA	NA	NA	NA	NA	NA	NA
DDB0215018	104425	AAAATGGTATCAAATGGATC	1	GATCAAGATTGACAATCAAC	1	unique	GATC	DDB_G0294220	+	DDB_G0294220	NA	NA	NA	NA	NA	NA	NA
DDB0215018	104744	GGATGCCTGCACTGTTGATC	1	GATCAAGTTGAGTATACAAG	1	unique	GATC	DDB_G0294220	+	DDB_G0294220	NA	NA	NA	NA	NA	NA	NA
DDB0215018	104858	TATCAACTTTATTCAAGATC	1	GATCAAGTCTTCTTTACGTT	1	unique	GATC	DDB_G0294220	+	DDB_G0294220	NA	NA	NA	NA	NA	NA	NA
DDB0215018	104909	CATCATCAGCGATAATGATC	1	GATCCTTTGTTCACATCAAT	1	unique	GATC	DDB_G0294220	+	DDB_G0294220	NA	NA	NA	NA	NA	NA	NA
DDB0215018	105270	GACGACAAGTACTCAAGATC	1	GATCTTTAGGGTTGGACAAG	1	unique	GATC	DDB_G0294220	+	DDB_G0294220	NA	NA	NA	NA	NA	NA	NA
DDB0215018	105632	TTACATTTCCCACATCGATC	1	GATCAATCTTCTTTTGATAA	1	unique	GATC	DDB_G0294220	+	DDB_G0294220	NA	NA	NA	NA	NA	NA	NA
DDB0215018	105738	GTCACCATCAGACGTTGATC	1	GATCTTACAAGGGATCAGTC	1	unique	GATC	DDB_G0294220	+	DDB_G0294220	NA	NA	NA	NA	NA	NA	NA
DDB0215018	105750	CGTTGATCTTACAAGGGATC	1	GATCAGTCCAGGTCATTACA	1	unique	GATC	DDB_G0294220	+	DDB_G0294220	NA	NA	NA	NA	NA	NA	NA
DDB0215018	105855	TGCTGCAGCTCAAGATGATC	1	GATCGATCAATTTCAATTCA	1	unique	GATC	DDB_G0294220	+	DDB_G0294220	NA	NA	NA	NA	NA	NA	NA
DDB0215018	105859	GCAGCTCAAGATGATCGATC	1	GATCAATTTCAATTCATGTA	1	unique	GATC	DDB_G0294220	+	DDB_G0294220	NA	NA	NA	NA	NA	NA	NA
DDB0215018	105993	TGGTATTTCTCATATGGATC	1	GATCAATCTGGTAATAGTTC	1	unique	GATC	DDB_G0294220	+	DDB_G0294220	NA	NA	NA	NA	NA	NA	NA
DDB0215018	106335	GACTAGTAGTGAATATGATC	1	GATCGCAAGCCCAATAATAG	1	unique	GATC	DDB_G0294220	+	DDB_G0294220	NA	NA	NA	NA	NA	NA	NA
DDB0215018	106739	AAATAGGTTGTAACAAGATC	1	GATCTCAAAAAAATATCTTG	7	unique_one	GATC	NA	NA	NA	NA	DDB_G0294220	DDB_G0294222	+	+	168	800
DDB0215018	107294	ATTGTAGTTTAAATTGGATC	13	GATCTAACCCTATCGGCCGA	6	not_unique	GATC	NA	NA	NA	NA	DDB_G0294220	DDB_G0294222	+	+	723	245
DDB0215018	108774	TATAAATAAAAATTATGATC	14	GATCACTCAATTTTTTATTT	15	not_unique	GATC	DDB_G0294224	+	DDB_G0294224_TE	ORF1 encoding a protein of unknown function of the putative DNA transposon DDT-A%3B refer to AF298201 for full-length consensus element	NA	NA	NA	NA	NA	NA
DDB0215018	109668	AAAGGAAGAGAGAATAGATC	10	GATCAATAATATATTACCTT	1	unique_one	GATC	DDB_G0294226	+	DDB_G0294226_TE	ORF1 encoding a protein of unknown function of the putative DNA transposon DDT-A%3B refer to AF298201 for full-length consensus element	NA	NA	NA	NA	NA	NA
DDB0215018	110113	ATAGAATTGTTAATCTGATC	1	GATCTGGAATATCAGGAAGT	8	unique_one	GATC	DDB_G0294228	-	DDB_G0294228_RTE	fragment of long terminal repeatretrotransposon skipper ORF2%3B L%3B refer to GenBank AF049230 for full length consensus element	NA	NA	NA	NA	NA	NA
DDB0215018	111378	TAGAACCAAAGTCTTGGATC	1	GATCTAAAGTTACGGTGGAT	5	unique_one	GATC	NA	NA	NA	NA	DDB_G0294228	DDB_G0294230	-	-	650	230
DDB0215018	113071	GAAAGGTTGTTGATTTGATC	31	GATCCTCCATTGACTTCATT	3	not_unique	GATC	DDB_G0294232	-	DDB_G0294232_RTE	ORF1 protein fragment of DIRS1 retrotransposon%3B refer to Genbank M11339 for full-length element	NA	NA	NA	NA	NA	NA
DDB0215018	113460	TTCGACCTTGCGCAATGATC	24	GATCGCGTCATTGTGCCGGT	38	not_unique	GATC	NA	NA	NA	NA	DDB_G0294232	DDB_G0294236	-	+	293	1197
DDB0215018	114724	AATGGAGATAATTGAAGATC	9	GATCTTAAAGATGCTTTTGA	8	not_unique	GATC	DDB_G0294236	+	DDB_G0294236_RTE	ORF of tRNA-specific long terminal repeat retrotransposon DGLT-A%3B refer to AF298204 for full-length element	NA	NA	NA	NA	NA	NA
DDB0215018	115001	ATTCGTATGAGAGGTAGATC	4	GATCAATGTATACTGGTCAA	4	not_unique	GATC	DDB_G0294236	+	DDB_G0294236_RTE	ORF of tRNA-specific long terminal repeat retrotransposon DGLT-A%3B refer to AF298204 for full-length element	NA	NA	NA	NA	NA	NA
DDB0215018	115073	AAGTATCTTGGTTCTGGATC	3	GATCTGGTTATACAACATCA	4	not_unique	GATC	DDB_G0294236	+	DDB_G0294236_RTE	ORF of tRNA-specific long terminal repeat retrotransposon DGLT-A%3B refer to AF298204 for full-length element	NA	NA	NA	NA	NA	NA
DDB0215018	115704	TTGATTGCAAGGAAATGATC	3	GATCATTAAGAATCTTGAAT	10	not_unique	GATC	DDB_G0294236	+	DDB_G0294236_RTE	ORF of tRNA-specific long terminal repeat retrotransposon DGLT-A%3B refer to AF298204 for full-length element	NA	NA	NA	NA	NA	NA
DDB0215018	115780	AATTGTTTGCAAAATTGATC	3	GATCTAAATATATTAGAAAA	3	not_unique	GATC	DDB_G0294236	+	DDB_G0294236_RTE	ORF of tRNA-specific long terminal repeat retrotransposon DGLT-A%3B refer to AF298204 for full-length element	NA	NA	NA	NA	NA	NA
DDB0215018	115871	AAATTGTCAAAACCAGGATC	3	GATCATTAATAGATGTTGAA	3	not_unique	GATC	DDB_G0294236	+	DDB_G0294236_RTE	ORF of tRNA-specific long terminal repeat retrotransposon DGLT-A%3B refer to AF298204 for full-length element	NA	NA	NA	NA	NA	NA
DDB0215018	116191	AGTTTTCTCAAAAATTGATC	3	GATCTTACTTCTGGTTATTA	3	not_unique	GATC	DDB_G0294236	+	DDB_G0294236_RTE	ORF of tRNA-specific long terminal repeat retrotransposon DGLT-A%3B refer to AF298204 for full-length element	NA	NA	NA	NA	NA	NA
DDB0215018	116508	AGTTTGAAAAAGAAGAGATC	3	GATCAAGTTTTTGGGATATA	3	not_unique	GATC	DDB_G0294236	+	DDB_G0294236_RTE	ORF of tRNA-specific long terminal repeat retrotransposon DGLT-A%3B refer to AF298204 for full-length element	NA	NA	NA	NA	NA	NA
DDB0215018	116740	TGATGAATTGGAAAATGATC	3	GATCGTGTAAAATTATTTAC	3	not_unique	GATC	DDB_G0294236	+	DDB_G0294236_RTE	ORF of tRNA-specific long terminal repeat retrotransposon DGLT-A%3B refer to AF298204 for full-length element	NA	NA	NA	NA	NA	NA
DDB0215018	117010	AGTAAAAATCATCACTGATC	3	GATCATCAACCTTTGAAATA	3	not_unique	GATC	DDB_G0294236	+	DDB_G0294236_RTE	ORF of tRNA-specific long terminal repeat retrotransposon DGLT-A%3B refer to AF298204 for full-length element	NA	NA	NA	NA	NA	NA
DDB0215018	117052	AACTGGTAAATTTACTGATC	3	GATCGTATTACAAGATGGAC	3	not_unique	GATC	DDB_G0294236	+	DDB_G0294236_RTE	ORF of tRNA-specific long terminal repeat retrotransposon DGLT-A%3B refer to AF298204 for full-length element	NA	NA	NA	NA	NA	NA
DDB0215018	117163	AAGATGTCCAGATAGAGATC	3	GATCAACAGCCAATTGATTG	3	not_unique	GATC	DDB_G0294236	+	DDB_G0294236_RTE	ORF of tRNA-specific long terminal repeat retrotransposon DGLT-A%3B refer to AF298204 for full-length element	NA	NA	NA	NA	NA	NA
DDB0215018	117269	AGAGTCTTACCATCAAGATC	4	GATCAAATCAAACATCTAAT	4	not_unique	GATC	DDB_G0294236	+	DDB_G0294236_RTE	ORF of tRNA-specific long terminal repeat retrotransposon DGLT-A%3B refer to AF298204 for full-length element	NA	NA	NA	NA	NA	NA
DDB0215018	118162	AAAGAAGTTGGTTTCTGATC	4	GATCGTGGTAAGAATTTTTT	4	not_unique	GATC	DDB_G0294236	+	DDB_G0294236_RTE	ORF of tRNA-specific long terminal repeat retrotransposon DGLT-A%3B refer to AF298204 for full-length element	NA	NA	NA	NA	NA	NA
DDB0215018	118774	TATGGGTAATCTTAGAGATC	5	GATCATAAAGTAGTCAATAT	5	not_unique	GATC	DDB_G0294236	+	DDB_G0294236_RTE	ORF of tRNA-specific long terminal repeat retrotransposon DGLT-A%3B refer to AF298204 for full-length element	NA	NA	NA	NA	NA	NA
DDB0215018	119751	GTTTCCATTTGCTAATGATC	4	GATCAGTTTGAAACTTTACA	4	not_unique	GATC	DDB_G0294238	+	DDB_G0294238	NA	NA	NA	NA	NA	NA	NA
DDB0215018	120102	TTAACCGATAAAATTCGATC	4	GATCTCATTGTGTTAGCCAA	3	not_unique	GATC	DDB_G0294238	+	DDB_G0294238	NA	NA	NA	NA	NA	NA	NA
DDB0215018	120440	AATGTCTACATTTGCCGATC	4	GATCTTCGTTCTGTTTCAGG	3	not_unique	GATC	DDB_G0294238	+	DDB_G0294238	NA	NA	NA	NA	NA	NA	NA
DDB0215018	120593	TTGTCTCTTAGTCTCAGATC	2	GATCATTATTCAAAATAAAA	4	not_unique	GATC	DDB_G0294238	+	DDB_G0294238	NA	NA	NA	NA	NA	NA	NA
DDB0215018	120925	TTGGGGAATTCATCTGGATC	2	GATCTGTTAATAGCCACATG	3	not_unique	GATC	DDB_G0294240	-	DDB_G0294240_ps	putative pseudogene%3B similar to a D. discoideum gene family%2C including %3Ca href%3D%22%2Fgene%2FDDB_G0295813%22%3EDDB_G0295813%3C%2Fa%3E	NA	NA	NA	NA	NA	NA
DDB0215018	121277	CAAAATTAGACCTAATGATC	2	GATCATGAGACCCTACGCTC	2	not_unique	GATC	NA	NA	NA	NA	DDB_G0294240	DDB_G0294663	-	+	259	1073
DDB0215018	122318	AAATTTTAAGAAAGGTGATC	2	GATCATTTCCAGTATTTAAA	2	not_unique	GATC	NA	NA	NA	NA	DDB_G0294240	DDB_G0294663	-	+	1300	32
DDB0215018	122390	CGAGCGTGAGACTGAAGATC	14	GATCTTAAGGTCGCTGGTTC	15	not_unique	GATC	DDB_G0294663	+	tRNA-Phe-GAA-2	transfers a phenylalanine residue to a growing polypeptide chain during protein synthesis%0A	NA	NA	NA	NA	NA	NA
DDB0215018	122410	TTAAGGTCGCTGGTTCGATC	15	GATCCCGGCCTGAGGCAAAT	8	not_unique	GATC	DDB_G0294663	+	tRNA-Phe-GAA-2	transfers a phenylalanine residue to a growing polypeptide chain during protein synthesis%0A	NA	NA	NA	NA	NA	NA
DDB0215018	122458	TTTTCCAATGGCTGATGATC	2	GATCACTCCGCCGAAAAGAC	2	not_unique	GATC	DDB_G0294242	+	DDB_G0294242_RTE	partial ORF1 protein of tRNA-specific non-long terminal repeat retrotransposon TRE3-B%3B refer to GenBank AF134170 for full-length consensus element	NA	NA	NA	NA	NA	NA
DDB0215018	122485	CGAAAAGACACAGTCTGATC	2	GATCACAGGTAAAAAAAAAA	44	not_unique	GATC	DDB_G0294242	+	DDB_G0294242_RTE	partial ORF1 protein of tRNA-specific non-long terminal repeat retrotransposon TRE3-B%3B refer to GenBank AF134170 for full-length consensus element	NA	NA	NA	NA	NA	NA
DDB0215018	123154	AACATATCATCTAATTGATC	24	GATCACACACAACATTGTTG	5	not_unique	GATC	DDB_G0294242	+	DDB_G0294242_RTE	partial ORF1 protein of tRNA-specific non-long terminal repeat retrotransposon TRE3-B%3B refer to GenBank AF134170 for full-length consensus element	NA	NA	NA	NA	NA	NA
DDB0215018	123173	CACACACAACATTGTTGATC	25	GATCAAAAGATCGAACAACC	27	not_unique	GATC	NA	NA	NA	NA	DDB_G0294242	DDB_G0294244	+	+	2	96
DDB0215018	123181	ACATTGTTGATCAAAAGATC	25	GATCGAACAACCATCTGGTA	26	not_unique	GATC	NA	NA	NA	NA	DDB_G0294242	DDB_G0294244	+	+	10	88
DDB0215018	123940	AATCTATTAATTCTTCGATC	16	GATCATTCTTTTTTTTTTGA	1	unique_one	GATC	NA	NA	NA	NA	DDB_G0294244	DDB_G0294246	+	-	471	334
DDB0215018	124579	TCCAATACCCTAAATGGATC	1	GATCATTTTGTGTTACCAAT	15	unique_one	GATC	DDB_G0294246	-	DDB_G0294246_TE	putative DNA transposon Tdd-4%3B refer to U57081 for full-length consensus element	NA	NA	NA	NA	NA	NA
DDB0215018	126644	ACCGGCACAATGACGCGATC	38	GATCATTGCGCAAGGTCGAA	24	not_unique	GATC	NA	NA	NA	NA	DDB_G0294246	DDB_G0294248	-	+	1454	291
DDB0215018	127034	AATGAAATCAATGGAGGATC	24	GATCAAATCAACAACCTTTC	31	not_unique	GATC	DDB_G0294248	+	DDB_G0294248_RTE	ORF1 protein fragment of DIRS1 retrotransposon%3B refer to Genbank M11339 for full-length element	NA	NA	NA	NA	NA	NA
DDB0215018	127613	TATCATAATTAAGAAAGATC	1	GATCAAGATGTTGAACCAAC	9	unique_one	GATC	DDB_G0294250	+	DDB_G0294250_RTE	ORF2 encoding reverse transcriptase (RT) and integrase (IN) proteins of long terminal repeat retrotransposon Skipper%3B refer to AF049230 for consensus element	NA	NA	NA	NA	NA	NA
DDB0215018	127661	CTATTACTCAACAGATGATC	5	GATCATAATATACATGTCGA	1	unique_one	GATC	DDB_G0294250	+	DDB_G0294250_RTE	ORF2 encoding reverse transcriptase (RT) and integrase (IN) proteins of long terminal repeat retrotransposon Skipper%3B refer to AF049230 for consensus element	NA	NA	NA	NA	NA	NA
DDB0215018	127722	TTAGGTATTATCAAAAGATC	10	GATCAGAATCAAATTACTCA	10	not_unique	GATC	DDB_G0294250	+	DDB_G0294250_RTE	ORF2 encoding reverse transcriptase (RT) and integrase (IN) proteins of long terminal repeat retrotransposon Skipper%3B refer to AF049230 for consensus element	NA	NA	NA	NA	NA	NA
DDB0215018	127826	AGTCACTGTTAGAGACGATC	9	GATCATCCATTCACTCCGGT	10	not_unique	GATC	NA	NA	NA	NA	DDB_G0294250	DDB_G0294252	+	+	52	75
DDB0215018	128085	ATTACAATACTTTGATGATC	10	GATCTTTTGGTTCATTCAAA	10	not_unique	GATC	NA	NA	NA	NA	DDB_G0294252	DDB_G0294254	+	+	5	27
DDB0215018	128744	ATAGAGAGTTCCTTTCGATC	1	GATCATTGATTCTCTAAAGA	1	unique	GATC	DDB_G0294254	+	DDB_G0294254_RTE	ORF2 encoding reverse transcriptase (RT) and integrase (IN) proteins of long terminal repeat retrotransposon Skipper%3B refer to AF049230 for consensus element	NA	NA	NA	NA	NA	NA
DDB0215018	128809	GGTTTCAATCTACACTGATC	10	GATCACCAAAATCTTACATA	9	not_unique	GATC	NA	NA	NA	NA	DDB_G0294254	DDB_G0294256	+	+	2	69
DDB0215018	129031	AATCGTCTCCGATAGAGATC	10	GATCTAAGATTCCTTTCAGA	1	unique_one	GATC	DDB_G0294256	+	DDB_G0294256_RTE	ORF2 encoding reverse transcriptase (RT) and integrase (IN) proteins of long terminal repeat retrotransposon Skipper%3B refer to AF049230 for consensus element	NA	NA	NA	NA	NA	NA
DDB0215018	129124	CAGAGTACAAGCTGATGATC	1	GATCTAACTGAAAGAATGAA	1	unique	GATC	DDB_G0294256	+	DDB_G0294256_RTE	ORF2 encoding reverse transcriptase (RT) and integrase (IN) proteins of long terminal repeat retrotransposon Skipper%3B refer to AF049230 for consensus element	NA	NA	NA	NA	NA	NA
DDB0215018	129493	AACTAACCTTTCAAAAGATC	4	GATCTAATCTCTCACAAACT	8	not_unique	GATC	NA	NA	NA	NA	DDB_G0294256	DDB_G0294262	+	-	70	2407
DDB0215018	129610	TCGATATGTCAAACACGATC	1	GATCGAAGGTCAATTGTTAA	1	unique	GATC	NA	NA	NA	NA	DDB_G0294256	DDB_G0294262	+	-	187	2290
DDB0215018	130364	TTACCAAAAGGGATTCGATC	34	GATCCCCCGAACCTCTATCA	1	unique_one	GATC	NA	NA	NA	NA	DDB_G0294256	DDB_G0294262	+	-	941	1536
DDB0215018	130468	TTATCCCCATTTTTTTGATC	8	GATCTAAAATTAGATCTTTT	3	not_unique	GATC	NA	NA	NA	NA	DDB_G0294256	DDB_G0294262	+	-	1045	1432
DDB0215018	130480	TTTTGATCTAAAATTAGATC	3	GATCTTTTTTATTAAAAACC	36	not_unique	GATC	NA	NA	NA	NA	DDB_G0294256	DDB_G0294262	+	-	1057	1420
DDB0215018	131178	ACAAATGGATACAATCGATC	2	GATCATTGAAGAGTTCAAGG	2	not_unique	GATC	NA	NA	NA	NA	DDB_G0294256	DDB_G0294262	+	-	1755	722
DDB0215018	131392	ACTGTCACAGAAATAAGATC	3	GATCTTTTCTTGGAAGTTGT	3	not_unique	GATC	NA	NA	NA	NA	DDB_G0294256	DDB_G0294262	+	-	1969	508
DDB0215018	132718	TTTATCCCATTTTTTTGATC	2	GATCTAAAATTAGATGTTTT	5	not_unique	GATC	DDB_G0294262	-	DDB_G0294262_TE	ORF2 (contains 2 introns) encoding a protein of unknown function of the putative DNA transposon DDT-A%3B refer to AF298201 for full-length consensus element	NA	NA	NA	NA	NA	NA
DDB0215018	134343	AAAATATCCAACAAATGATC	11	GATCCAGATGACCCATGTAA	11	not_unique	GATC	DDB_G0294264	+	DDB_G0294264_TE	ORF1 encoding a protein of unknown function of the putative DNA transposon DDT-A%3B refer to AF298201 for full-length consensus element	NA	NA	NA	NA	NA	NA
DDB0215018	134829	TATAAATAAAAATTATGATC	14	GATCACTCAATTTTTTATTT	15	not_unique	GATC	DDB_G0294264	+	DDB_G0294264_TE	ORF1 encoding a protein of unknown function of the putative DNA transposon DDT-A%3B refer to AF298201 for full-length consensus element	NA	NA	NA	NA	NA	NA
DDB0215018	135724	AAAGGAAGAGAGAATAGATC	10	GATCAATATTATATTACCTT	10	not_unique	GATC	DDB_G0294264	+	DDB_G0294264_TE	ORF1 encoding a protein of unknown function of the putative DNA transposon DDT-A%3B refer to AF298201 for full-length consensus element	NA	NA	NA	NA	NA	NA
DDB0215018	137912	AAGATAGAGTTACCCCGATC	2	GATCAATCTTTTCGCGAATA	1	unique_one	GATC	NA	NA	NA	NA	DDB_G0294266	DDB_G0294268	+	-	1163	619
DDB0215018	138341	TATTCCGGGATAACTCGATC	10	GATCTTTTTCAAAATAACTT	19	not_unique	GATC	NA	NA	NA	NA	DDB_G0294266	DDB_G0294268	+	-	1592	190
DDB0215018	138732	GGAGTCATGTTTTAGGGATC	2	GATCTTAGGATGATCTGTTT	2	not_unique	GATC	DDB_G0294268	-	DDB_G0294268_TE	ORF1 encoding a protein of unknown function of the putative DNA transposon Tdd-5%3B refer to AF298206 for full-length consensus element	NA	NA	NA	NA	NA	NA
DDB0215018	138743	TTAGGGATCTTAGGATGATC	2	GATCTGTTTGTTATGTTGAA	2	not_unique	GATC	DDB_G0294268	-	DDB_G0294268_TE	ORF1 encoding a protein of unknown function of the putative DNA transposon Tdd-5%3B refer to AF298206 for full-length consensus element	NA	NA	NA	NA	NA	NA
DDB0215018	139212	TAATTAACTTTTAAAGGATC	1	GATCATCTGGAATTGCGATT	1	unique	GATC	DDB_G0294268	-	DDB_G0294268_TE	ORF1 encoding a protein of unknown function of the putative DNA transposon Tdd-5%3B refer to AF298206 for full-length consensus element	NA	NA	NA	NA	NA	NA
DDB0215018	139254	AAATTGTAATTAGTAAGATC	1	GATCATACCCAATTTTCTTT	2	unique_one	GATC	DDB_G0294268	-	DDB_G0294268_TE	ORF1 encoding a protein of unknown function of the putative DNA transposon Tdd-5%3B refer to AF298206 for full-length consensus element	NA	NA	NA	NA	NA	NA
DDB0215018	139525	GGTTTTTTATTGTTTTGATC	2	GATCATCATTATGTATTTCA	2	not_unique	GATC	DDB_G0294268	-	DDB_G0294268_TE	ORF1 encoding a protein of unknown function of the putative DNA transposon Tdd-5%3B refer to AF298206 for full-length consensus element	NA	NA	NA	NA	NA	NA
DDB0215018	140338	ATTTGAAGATACTGACGATC	2	GATCTCACTCAATCCCTCAA	2	not_unique	GATC	DDB_G0294270	+	DDB_G0294270	NA	NA	NA	NA	NA	NA	NA
DDB0215018	140469	AGAAAATGGCACAAAAGATC	2	GATCACTTAGAGATGTACTC	1	unique_one	GATC	DDB_G0294270	+	DDB_G0294270	NA	NA	NA	NA	NA	NA	NA
DDB0215018	140632	ACGCACAAGCAAAACAGATC	2	GATCGAAGTAACAAAGGGAA	1	unique_one	GATC	DDB_G0294272	+	DDB_G0294272	NA	NA	NA	NA	NA	NA	NA
DDB0215018	140661	AAGGGAATTCAAGAATGATC	1	GATCCCAGCAAATAAAACAG	2	unique_one	GATC	DDB_G0294272	+	DDB_G0294272	NA	NA	NA	NA	NA	NA	NA
DDB0215018	140917	AAGAGCAATTGGAGGCGATC	1	GATCGAGAAAGAGCTAAAGG	1	unique	GATC	DDB_G0294272	+	DDB_G0294272	NA	NA	NA	NA	NA	NA	NA
DDB0215018	140989	AACAAGAAGCTTGATTGATC	2	GATCAACAGCGCACCCCCAG	2	not_unique	GATC	NA	NA	NA	NA	DDB_G0294272	DDB_G0294274	+	+	6	116
DDB0215018	141018	CCCCCAGCTGTTCATAGATC	2	GATCTCAAAGCGCCCGAAGT	2	not_unique	GATC	NA	NA	NA	NA	DDB_G0294272	DDB_G0294274	+	+	35	87
DDB0215018	141087	GCATCGAAGAAAAGACGATC	1	GATCCGAGGCAGCTAGCCCA	2	unique_one	GATC	NA	NA	NA	NA	DDB_G0294272	DDB_G0294274	+	+	104	18
DDB0215018	141146	ACCTCAAAGAGAGGATGATC	2	GATCGCGCTTCAAAATGCAC	1	unique_one	GATC	DDB_G0294274	+	DDB_G0294274	NA	NA	NA	NA	NA	NA	NA
DDB0215018	141771	CCAAGGGATACAACGTGATC	2	GATCTGCAAGAGGCGAAAAG	2	not_unique	GATC	NA	NA	NA	NA	DDB_G0294276	DDB_G0294278	+	+	140	191
DDB0215018	142019	AAGCAGTGTTTTGCTAGATC	2	GATCAGATGGATCAGCAGAT	2	not_unique	GATC	DDB_G0294278	+	DDB_G0294278	NA	NA	NA	NA	NA	NA	NA
DDB0215018	142028	TTTGCTAGATCAGATGGATC	2	GATCAGCAGATAGCGCAAGT	2	not_unique	GATC	DDB_G0294278	+	DDB_G0294278	NA	NA	NA	NA	NA	NA	NA
DDB0215018	142168	GAGCAGCTATATCAAAGATC	2	GATCATTCGAGATACGCAAC	2	not_unique	GATC	DDB_G0294278	+	DDB_G0294278	NA	NA	NA	NA	NA	NA	NA
DDB0215018	142546	ACCGGCACAATGACGCGATC	38	GATCATTGCGCAAGGTCGAA	24	not_unique	GATC	NA	NA	NA	NA	DDB_G0294278	DDB_G0294280	+	-	186	232
DDB0215018	143232	CTTCACCAAGTCTGATGATC	21	GATCTTGGTAAACCAAACAT	1	unique_one	GATC	DDB_G0294280	-	DDB_G0294280_RTE	ORF2 protein fragment of DIRS1 retrotransposon%3B refer to Genbank M11339 for full-length element	NA	NA	NA	NA	NA	NA
DDB0215018	143419	ATTCTTGTGATGAATGGATC	11	GATCATTAACAATATCAGTT	22	not_unique	GATC	DDB_G0294280	-	DDB_G0294280_RTE	ORF2 protein fragment of DIRS1 retrotransposon%3B refer to Genbank M11339 for full-length element	NA	NA	NA	NA	NA	NA
DDB0215018	143472	CAACTGATTCAACATAGATC	5	GATCGATGACCATTAATTGT	1	unique_one	GATC	DDB_G0294280	-	DDB_G0294280_RTE	ORF2 protein fragment of DIRS1 retrotransposon%3B refer to Genbank M11339 for full-length element	NA	NA	NA	NA	NA	NA
DDB0215018	143875	CGGATACCAAGTTGCTGATC	22	GATCTCCAGATTGGGAAGAT	23	not_unique	GATC	DDB_G0294280	-	DDB_G0294280_RTE	ORF2 protein fragment of DIRS1 retrotransposon%3B refer to Genbank M11339 for full-length element	NA	NA	NA	NA	NA	NA
DDB0215018	143892	ATCTCCAGATTGGGAAGATC	23	GATCAGTATTATAGAAACCT	19	not_unique	GATC	DDB_G0294280	-	DDB_G0294280_RTE	ORF2 protein fragment of DIRS1 retrotransposon%3B refer to Genbank M11339 for full-length element	NA	NA	NA	NA	NA	NA
DDB0215018	144071	AGGTGAGATGCGAACAGATC	19	GATCCATCTGTATTTGACCG	23	not_unique	GATC	DDB_G0294280	-	DDB_G0294280_RTE	ORF2 protein fragment of DIRS1 retrotransposon%3B refer to Genbank M11339 for full-length element	NA	NA	NA	NA	NA	NA
DDB0215018	144293	TCGAACAGAACTGAGAGATC	17	GATCTTGTATTTGACCACCC	9	not_unique	GATC	NA	NA	NA	NA	DDB_G0294280	DDB_G0294282	-	+	35	1570
DDB0215018	144653	GGAATGGGGGACGATTGATC	1	GATCCCAATCTCCATTGGCT	16	unique_one	GATC	NA	NA	NA	NA	DDB_G0294280	DDB_G0294282	-	+	395	1210
DDB0215018	145210	AAATAAAAAATTGAGTGATC	15	GATCATAATTTTTATTTATA	14	not_unique	GATC	NA	NA	NA	NA	DDB_G0294280	DDB_G0294282	-	+	952	653
DDB0215018	145827	ACCGGCACAATGATGCGATC	2	GATCATTGAGCAAGGTCGAA	3	not_unique	GATC	NA	NA	NA	NA	DDB_G0294280	DDB_G0294282	-	+	1569	36
DDB0215018	145898	AATGAAATCAATGGAAGATC	6	GATCAAATCAACAACCTTTC	31	not_unique	GATC	DDB_G0294282	+	DDB_G0294282_RTE	ORF1 protein fragment of DIRS1 retrotransposon%3B refer to Genbank M11339 for full-length element	NA	NA	NA	NA	NA	NA
DDB0215018	147007	TTACTTGAGAATAACGGATC	2	GATCATTATCTGAAATAATT	2	not_unique	GATC	NA	NA	NA	NA	DDB_G0294282	DDB_G0294286	+	+	644	1969
DDB0215018	147058	AATGTAAACATAACTTGATC	2	GATCTTGTGACAATGGAAAA	1	unique_one	GATC	NA	NA	NA	NA	DDB_G0294282	DDB_G0294286	+	+	695	1918
DDB0215018	147497	TTATCTTTTAAGCATTGATC	1	GATCTAATGGATAAGTGTTT	2	unique_one	GATC	NA	NA	NA	NA	DDB_G0294282	DDB_G0294286	+	+	1134	1479
DDB0215018	147645	TAATAATATGAAGTTTGATC	1	GATCTTGGAAAAATTAATTT	1	unique	GATC	NA	NA	NA	NA	DDB_G0294282	DDB_G0294286	+	+	1282	1331
DDB0215018	147851	TATTTCTCAATTAATTGATC	1	GATCGAAAATGTGAATCAGC	1	unique	GATC	NA	NA	NA	NA	DDB_G0294282	DDB_G0294286	+	+	1488	1125
DDB0215018	149609	AACTGATATTGTTAATGATC	22	GATCCATTCATTACAAGAAT	11	not_unique	GATC	DDB_G0294286	+	DDB_G0294286_RTE	ORF2 protein fragment of DIRS1 retrotransposon%3B refer to Genbank M11339 for full-length element	NA	NA	NA	NA	NA	NA
DDB0215018	149796	ATGTTTGGTTTAGCAAGATC	21	GATCATAAGACTTGGTGAAG	1	unique_one	GATC	DDB_G0294286	+	DDB_G0294286_RTE	ORF2 protein fragment of DIRS1 retrotransposon%3B refer to Genbank M11339 for full-length element	NA	NA	NA	NA	NA	NA
DDB0215018	150393	TTCGACCTTGCGCAATGATC	24	GATCGAAGACAGGGGCCTCA	1	unique_one	GATC	DDB_G0294286	+	DDB_G0294286_RTE	ORF2 protein fragment of DIRS1 retrotransposon%3B refer to Genbank M11339 for full-length element	NA	NA	NA	NA	NA	NA
DDB0215018	150805	AGGCGATATCTATTACGATC	1	GATCTCTTTGCCTTTAAAGG	1	unique	GATC	DDB_G0294286	+	DDB_G0294286_RTE	ORF2 protein fragment of DIRS1 retrotransposon%3B refer to Genbank M11339 for full-length element	NA	NA	NA	NA	NA	NA
DDB0215018	151253	ACCGGCACAATGACGCGATC	38	GATCATTGCACAAGGTCGAA	5	not_unique	GATC	NA	NA	NA	NA	DDB_G0294286	DDB_G0294288	+	-	302	564
DDB0215018	151544	ACCGGCACAATGACGCGATC	38	GATCATTGTCTAAGGTCGAA	1	unique_one	GATC	NA	NA	NA	NA	DDB_G0294286	DDB_G0294288	+	-	593	273
DDB0215018	152745	TTCGACCTTGTGCAATGATC	5	GATCGCGTCATTGTGCCGGT	38	not_unique	GATC	NA	NA	NA	NA	DDB_G0294288	DDB_G0294300	-	-	513	1664
DDB0215018	153457	TCCAGGCATCCGGCCGGATC	1	GATCTGGCGAAGACAACACG	1	unique	GATC	NA	NA	NA	NA	DDB_G0294288	DDB_G0294300	-	-	1225	952
DDB0215018	153482	AAGACAACACGGTTAAGATC	1	GATCTGGTTTTCTGATCCAG	1	unique	GATC	NA	NA	NA	NA	DDB_G0294288	DDB_G0294300	-	-	1250	927
DDB0215018	153495	TAAGATCTGGTTTTCTGATC	1	GATCCAGTCTTTGCCCTGAG	1	unique	GATC	NA	NA	NA	NA	DDB_G0294288	DDB_G0294300	-	-	1263	914
DDB0215018	153617	CGCTATTACTAAAGGGGATC	1	GATCTGACGACTCGTGATCA	1	unique	GATC	NA	NA	NA	NA	DDB_G0294288	DDB_G0294300	-	-	1385	792
DDB0215018	153632	GGATCTGACGACTCGTGATC	1	GATCATTGGTAATCTCCCGC	1	unique	GATC	NA	NA	NA	NA	DDB_G0294288	DDB_G0294300	-	-	1400	777
DDB0215018	153888	ACCGGCACAATGACGCGATC	38	GATCTTTGCGCAAGGTTGAA	1	unique_one	GATC	NA	NA	NA	NA	DDB_G0294288	DDB_G0294300	-	-	1656	521
DDB0215018	154667	TGCAACATTACTTGGTGATC	17	GATCCATTTTTAAGAAAATA	1	unique_one	GATC	DDB_G0294300	-	DDB_G0294300_RTE	ORF2 protein fragment of DIRS1 retrotransposon%3B refer to Genbank M11339 for full-length element	NA	NA	NA	NA	NA	NA
DDB0215018	154965	AATGAAATCAATGGAGGATC	24	GATCAAATCAACAACAATTG	1	unique_one	GATC	DDB_G0294302	+	DDB_G0294302	NA	NA	NA	NA	NA	NA	NA
DDB0215018	155211	ATGTTCAAATTCATTGGATC	1	GATCTTCACCAAACAAGCCA	1	unique	GATC	DDB_G0294302	+	DDB_G0294302	NA	NA	NA	NA	NA	NA	NA
DDB0215018	155381	CGAAACCGTCTTAGATGATC	1	GATCTCATTGAAACAGGAAA	1	unique	GATC	DDB_G0294302	+	DDB_G0294302	NA	NA	NA	NA	NA	NA	NA
DDB0215018	156419	ACCGGCACAATGACGCGATC	38	GATCATTGTGTAAGGTCGAA	10	not_unique	GATC	NA	NA	NA	NA	DDB_G0294302	DDB_G0294308	+	+	225	400
DDB0215018	157614	ATGTTTGGTTTATCAAGATC	2	GATCATCAGACTTAGTGAAG	2	not_unique	GATC	DDB_G0294310	+	DDB_G0294310_RTE	ORF1 protein fragment of DIRS1 retrotransposon%3B refer to Genbank M11339 for full-length element	NA	NA	NA	NA	NA	NA
DDB0215018	158604	CACGTAATTGGGATAAGATC	2	GATCAACAGCATTAACAGGC	1	unique_one	GATC	NA	NA	NA	NA	DDB_G0294310	DDB_G0294314	+	+	107	1188
DDB0215018	158773	GAACTACGGTATTGTTGATC	2	GATCTTAATCGTGGGCGTGT	1	unique_one	GATC	NA	NA	NA	NA	DDB_G0294310	DDB_G0294314	+	+	276	1019
DDB0215018	158879	TACATCCTCTTTTTTTGATC	1	GATCTATTGATATGTAAAGT	2	unique_one	GATC	NA	NA	NA	NA	DDB_G0294310	DDB_G0294314	+	+	382	913
DDB0215018	159185	AGATTCGTTAATGACTGATC	4	GATCGGCAAGCCAGCATCTC	1	unique_one	GATC	NA	NA	NA	NA	DDB_G0294310	DDB_G0294314	+	+	688	607
DDB0215018	159221	CAGAATGGTAGAACTGGATC	2	GATCTCTTGGTAGATCAGCA	1	unique_one	GATC	NA	NA	NA	NA	DDB_G0294310	DDB_G0294314	+	+	724	571
DDB0215018	159233	ACTGGATCTCTTGGTAGATC	1	GATCAGCATTAAAAGCCAAA	1	unique	GATC	NA	NA	NA	NA	DDB_G0294310	DDB_G0294314	+	+	736	559
DDB0215018	159335	ATGCTTAATATCGATAGATC	3	GATCAAAAATATTCCGTTAT	3	not_unique	GATC	NA	NA	NA	NA	DDB_G0294310	DDB_G0294314	+	+	838	457
DDB0215018	159669	ATTCTCTGCCAATTAAGATC	1	GATCTAAAGAAATCGCTATA	1	unique	GATC	NA	NA	NA	NA	DDB_G0294310	DDB_G0294314	+	+	1172	123
DDB0215018	159703	TACGGTCACGAACGGGGATC	1	GATCGATAAAAGCCTAAGAG	1	unique	GATC	NA	NA	NA	NA	DDB_G0294310	DDB_G0294314	+	+	1206	89
DDB0215018	159941	GGGCGGTTTCTGATGCGATC	2	GATCAAAGAAAACTACCAGG	1	unique_one	GATC	DDB_G0294314	+	DDB_G0294314	NA	NA	NA	NA	NA	NA	NA
DDB0215018	160007	ATATCCTTGCTAAAGTGATC	1	GATCTTGTCCAACGATACTA	1	unique	GATC	DDB_G0294314	+	DDB_G0294314	NA	NA	NA	NA	NA	NA	NA
DDB0215018	160756	TTATCCCCATTTTTTTGATC	8	GATCTAAAATTAGATGTTTT	5	not_unique	GATC	DDB_G0294314	+	DDB_G0294314	NA	NA	NA	NA	NA	NA	NA
DDB0215018	161248	TGCTGTATCCGCTGGAGATC	2	GATCAGCAAAGTAATCAAGC	3	not_unique	GATC	DDB_G0294314	+	DDB_G0294314	NA	NA	NA	NA	NA	NA	NA
DDB0215018	161540	AAATAACACCTAGCATGATC	1	GATCCAAATTACAGAATGTG	3	unique_one	GATC	DDB_G0294314	+	DDB_G0294314	NA	NA	NA	NA	NA	NA	NA
DDB0215151	140	GAAAGGTTGTTGATTTGATC	31	GATCCTCCATTGATTTCATT	24	not_unique	GATC	NA	NA	NA	NA	start	DDB_G0294320	NA	+	139	1424
DDB0215151	524	TTCGACCTTACACAATGATC	10	GATCGCGTCATTGTGCCGGT	38	not_unique	GATC	NA	NA	NA	NA	start	DDB_G0294320	NA	+	523	1040
DDB0215151	1007	GCTGTCGTATGCGCTTGATC	1	GATCTTTATGGATAGATGTT	1	unique	GATC	NA	NA	NA	NA	start	DDB_G0294320	NA	+	1006	557
DDB0215151	1089	AACACATCATGATAGCGATC	1	GATCAATGGCATTGTGACTT	1	unique	GATC	NA	NA	NA	NA	start	DDB_G0294320	NA	+	1088	475
DDB0215151	1429	TTCAGTGCTACAACCAGATC	1	GATCGTGATGATCGCGATGA	1	unique	GATC	NA	NA	NA	NA	start	DDB_G0294320	NA	+	1428	135
DDB0215151	1438	ACAACCAGATCGTGATGATC	1	GATCGCGATGAACTGCGTAA	1	unique	GATC	NA	NA	NA	NA	start	DDB_G0294320	NA	+	1437	126
DDB0215151	2595	AAATCCTGATATTCCAGATC	1	GATCAGATTAACAATTCCAG	9	unique_one	GATC	DDB_G0294320	+	DDB_G0294320_RTE	long terminal repeat retrotransposon Skipper GAG-PRO-POL%3B refer to GenBank AF049230 for full length consensus element	NA	NA	NA	NA	NA	NA
DDB0215151	2652	TATCATTATAAAGAAAGATC	2	GATCAAGATGTTGAACCAAC	9	not_unique	GATC	DDB_G0294320	+	DDB_G0294320_RTE	long terminal repeat retrotransposon Skipper GAG-PRO-POL%3B refer to GenBank AF049230 for full length consensus element	NA	NA	NA	NA	NA	NA
DDB0215151	2700	CTATTACTCAACAGATGATC	5	GATCATAAGAGACATGTCGA	9	not_unique	GATC	DDB_G0294320	+	DDB_G0294320_RTE	long terminal repeat retrotransposon Skipper GAG-PRO-POL%3B refer to GenBank AF049230 for full length consensus element	NA	NA	NA	NA	NA	NA
DDB0215151	2761	TTAGGTATTATCAAAAGATC	10	GATCAGAATCAAATTACTCA	10	not_unique	GATC	DDB_G0294320	+	DDB_G0294320_RTE	long terminal repeat retrotransposon Skipper GAG-PRO-POL%3B refer to GenBank AF049230 for full length consensus element	NA	NA	NA	NA	NA	NA
DDB0215151	2864	AGTCACTATTAGAGACGATC	1	GATCATCCATTCACTCCGGT	10	unique_one	GATC	DDB_G0294320	+	DDB_G0294320_RTE	long terminal repeat retrotransposon Skipper GAG-PRO-POL%3B refer to GenBank AF049230 for full length consensus element	NA	NA	NA	NA	NA	NA
DDB0215151	3122	ATTACAATACTTTGATGATC	10	GATCTTTTGGTTCATTCAAA	10	not_unique	GATC	DDB_G0294320	+	DDB_G0294320_RTE	long terminal repeat retrotransposon Skipper GAG-PRO-POL%3B refer to GenBank AF049230 for full length consensus element	NA	NA	NA	NA	NA	NA
DDB0215151	3981	ATTTACAGTTGAAGTCGATC	9	GATCAAGTTTGTGTCATTGT	9	not_unique	GATC	DDB_G0294322	+	DDB_G0294322_RTE	ORF2 encoding reverse transcriptase (RT) and integrase (IN) proteins of long terminal repeat retrotransposon Skipper%3B refer to AF049230 for consensus element	NA	NA	NA	NA	NA	NA
DDB0215151	4791	GAAAGGTTGTTGATTTGATC	31	GATCTTCCATTGATTTCATT	6	not_unique	GATC	DDB_G0294324	-	DDB_G0294324_RTE	ORF1 protein fragment of DIRS1 retrotransposon%3B refer to Genbank M11339 for full-length element	NA	NA	NA	NA	NA	NA
DDB0215151	7052	CTCATTCTTGAAAGAAGATC	1	GATCGGGAAGAGCGATTCGG	1	unique	GATC	NA	NA	NA	NA	DDB_G0294328	DDB_G0294332	-	-	140	938
DDB0215151	7214	TGTTCTACAATAGAAAGATC	1	GATCATTGTTTCTATCTGCG	1	unique	GATC	NA	NA	NA	NA	DDB_G0294328	DDB_G0294332	-	-	302	776
DDB0215151	7349	GGAGTTCTGCCTCGATGATC	1	GATCTGTTTTGGTTATATTT	1	unique	GATC	NA	NA	NA	NA	DDB_G0294328	DDB_G0294332	-	-	437	641
DDB0215151	7428	TTGTTATCGCTATTTTGATC	1	GATCAAAAAGTTTGATCTCG	1	unique	GATC	NA	NA	NA	NA	DDB_G0294328	DDB_G0294332	-	-	516	562
DDB0215151	7441	TTTGATCAAAAAGTTTGATC	1	GATCTCGGTTCGAATTTTGT	1	unique	GATC	NA	NA	NA	NA	DDB_G0294328	DDB_G0294332	-	-	529	549
DDB0215151	7714	ACCGGCACAATGACGCGATC	38	GATCATTGTGTAAGGTCGAA	10	not_unique	GATC	NA	NA	NA	NA	DDB_G0294328	DDB_G0294332	-	-	802	276
DDB0215151	8489	CTTCACCAAGTCTGATGATC	21	GATCTTGCTAAACCAAACTT	1	unique_one	GATC	DDB_G0294332	-	DDB_G0294332_RTE	ORF2 protein fragment of DIRS1 retrotransposon%3B refer to Genbank M11339 for full-length element	NA	NA	NA	NA	NA	NA
DDB0215151	8675	ATTCTTGTGATGAATGGATC	11	GATCATTAACAACATCAGTT	1	unique_one	GATC	DDB_G0294332	-	DDB_G0294332_RTE	ORF2 protein fragment of DIRS1 retrotransposon%3B refer to Genbank M11339 for full-length element	NA	NA	NA	NA	NA	NA
DDB0215151	8947	ACCGGCACAATGACGCGATC	38	GATCATTGCACAAGGTCGAA	5	not_unique	GATC	NA	NA	NA	NA	DDB_G0294332	DDB_G0294336	-	-	240	1176
DDB0215151	9439	TTTTTTTCTAAAATTAGATC	3	GATCTTTTTTATTAAAAACC	36	not_unique	GATC	NA	NA	NA	NA	DDB_G0294332	DDB_G0294336	-	-	732	684
DDB0215151	10710	GGATTTAATGTACCAAGATC	1	GATCACTTGGTATAGTTGCT	1	unique	GATC	DDB_G0294336	-	DDB_G0294336_RTE	Partial ORF of tRNA-specific long terminal repeat retrotransposon DGLT-A%3B refer to AF298204 for full-length element	NA	NA	NA	NA	NA	NA
DDB0215151	11728	TAAATCTCTTGTTTCTGATC	1	GATCTTCCCAAGATCATTTC	1	unique	GATC	DDB_G0294338	-	DDB_G0294338_RTE	Partial ORF of tRNA-specific long terminal repeat retrotransposon DGLT-A%3B refer to AF298204 for full-length element	NA	NA	NA	NA	NA	NA
DDB0215151	11739	TTTCTGATCTTCCCAAGATC	1	GATCATTTCTAAGGAATGAT	1	unique	GATC	DDB_G0294338	-	DDB_G0294338_RTE	Partial ORF of tRNA-specific long terminal repeat retrotransposon DGLT-A%3B refer to AF298204 for full-length element	NA	NA	NA	NA	NA	NA
DDB0215151	11916	AATGATATAATACCGTGATC	1	GATCTTGACAAAGAGTTGCT	1	unique	GATC	DDB_G0294338	-	DDB_G0294338_RTE	Partial ORF of tRNA-specific long terminal repeat retrotransposon DGLT-A%3B refer to AF298204 for full-length element	NA	NA	NA	NA	NA	NA
DDB0215151	12016	CTGGGTACACTAAAATGATC	1	GATCTTATTGTTCTTCAACC	1	unique	GATC	DDB_G0294338	-	DDB_G0294338_RTE	Partial ORF of tRNA-specific long terminal repeat retrotransposon DGLT-A%3B refer to AF298204 for full-length element	NA	NA	NA	NA	NA	NA
DDB0215151	12172	AGAAATTTAATGTGCCGATC	1	GATCAATCTTTGTAATTCTT	1	unique	GATC	DDB_G0294338	-	DDB_G0294338_RTE	Partial ORF of tRNA-specific long terminal repeat retrotransposon DGLT-A%3B refer to AF298204 for full-length element	NA	NA	NA	NA	NA	NA
DDB0215151	12204	TCTTTTACATTCTTTGGATC	1	GATCTAATAACTTCATTAAT	1	unique	GATC	DDB_G0294338	-	DDB_G0294338_RTE	Partial ORF of tRNA-specific long terminal repeat retrotransposon DGLT-A%3B refer to AF298204 for full-length element	NA	NA	NA	NA	NA	NA
DDB0215151	12225	AATAACTTCATTAATGGATC	1	GATCTAGTCTATCATAATCT	1	unique	GATC	DDB_G0294338	-	DDB_G0294338_RTE	Partial ORF of tRNA-specific long terminal repeat retrotransposon DGLT-A%3B refer to AF298204 for full-length element	NA	NA	NA	NA	NA	NA
DDB0215151	12378	TCTAGATGTGGTGTATGATC	1	GATCCATTACTGATTTTGAG	1	unique	GATC	DDB_G0294338	-	DDB_G0294338_RTE	Partial ORF of tRNA-specific long terminal repeat retrotransposon DGLT-A%3B refer to AF298204 for full-length element	NA	NA	NA	NA	NA	NA
DDB0215151	12626	TTTTGAGTATACATGAGATC	1	GATCCTTTAATTTGATTCCA	1	unique	GATC	DDB_G0294338	-	DDB_G0294338_RTE	Partial ORF of tRNA-specific long terminal repeat retrotransposon DGLT-A%3B refer to AF298204 for full-length element	NA	NA	NA	NA	NA	NA
DDB0215151	12675	TCTGGTATTGGATATCGATC	1	GATCCTTTACAGTGATATTA	1	unique	GATC	DDB_G0294338	-	DDB_G0294338_RTE	Partial ORF of tRNA-specific long terminal repeat retrotransposon DGLT-A%3B refer to AF298204 for full-length element	NA	NA	NA	NA	NA	NA
DDB0215151	13492	GATTTGAGCATTGAGTGATC	1	GATCCAAATGCTGTGATGTA	1	unique	GATC	DDB_G0294338	-	DDB_G0294338_RTE	Partial ORF of tRNA-specific long terminal repeat retrotransposon DGLT-A%3B refer to AF298204 for full-length element	NA	NA	NA	NA	NA	NA
DDB0215151	13535	AATTTATCAAATTTTTGATC	1	GATCGGTGAGTTTTGATAAT	1	unique	GATC	DDB_G0294338	-	DDB_G0294338_RTE	Partial ORF of tRNA-specific long terminal repeat retrotransposon DGLT-A%3B refer to AF298204 for full-length element	NA	NA	NA	NA	NA	NA
DDB0215151	14877	TTTTGTTCTAAAATTAGATC	21	GATCTTTTTTATTAAAAACC	36	not_unique	GATC	NA	NA	NA	NA	DDB_G0294338	DDB_G0294340	-	+	1072	1268
DDB0220052	812	TAGTGGAGTAATGGGCGATC	1	GATCTAACAACTTCAATGGA	22	unique_one	GATC	DDB_G0294342	+	DDB_G0294342_RTE	fused fragments of the DIRS1 retrotransposon%3B refer to Genbank M11339 for full-length element	NA	NA	NA	NA	NA	NA
DDB0220052	830	TCTAACAACTTCAATGGATC	22	GATCACCAAGTAATGTTGCA	17	not_unique	GATC	DDB_G0294342	+	DDB_G0294342_RTE	fused fragments of the DIRS1 retrotransposon%3B refer to Genbank M11339 for full-length element	NA	NA	NA	NA	NA	NA
DDB0220052	1142	GGGTGGTCAAATACAAGATC	9	GATCTCTCAGTTCTGTTCGA	17	not_unique	GATC	DDB_G0294344	+	DDB_G0294344_RTE	ORF2 protein fragment of DIRS1 retrotransposon%3B refer to Genbank M11339 for full-length element	NA	NA	NA	NA	NA	NA
DDB0220052	1367	CGGTCAAATACAGATGGATC	23	GATCTGTTCGCATCTCACCT	19	not_unique	GATC	DDB_G0294344	+	DDB_G0294344_RTE	ORF2 protein fragment of DIRS1 retrotransposon%3B refer to Genbank M11339 for full-length element	NA	NA	NA	NA	NA	NA
DDB0220052	1546	AGGTTTCTATAATACTGATC	19	GATCTTCCCAATCTGGAGAT	23	not_unique	GATC	DDB_G0294344	+	DDB_G0294344_RTE	ORF2 protein fragment of DIRS1 retrotransposon%3B refer to Genbank M11339 for full-length element	NA	NA	NA	NA	NA	NA
DDB0220052	1563	ATCTTCCCAATCTGGAGATC	23	GATCAGCAACTTGGTATCCG	22	not_unique	GATC	DDB_G0294344	+	DDB_G0294344_RTE	ORF2 protein fragment of DIRS1 retrotransposon%3B refer to Genbank M11339 for full-length element	NA	NA	NA	NA	NA	NA
DDB0220052	1690	AGTCGATACCAATCCAGATC	1	GATCCAACAACGTTGGAAAC	1	unique	GATC	DDB_G0294344	+	DDB_G0294344_RTE	ORF2 protein fragment of DIRS1 retrotransposon%3B refer to Genbank M11339 for full-length element	NA	NA	NA	NA	NA	NA
DDB0220052	2020	AACTGATATTGTTAATGATC	22	GATCCATTCATTACAAGAAT	11	not_unique	GATC	DDB_G0294344	+	DDB_G0294344_RTE	ORF2 protein fragment of DIRS1 retrotransposon%3B refer to Genbank M11339 for full-length element	NA	NA	NA	NA	NA	NA
DDB0220052	2207	ATGTTTGGTTTAGCAAGATC	21	GATCATCAGACTTAGTGAAG	2	not_unique	GATC	DDB_G0294344	+	DDB_G0294344_RTE	ORF2 protein fragment of DIRS1 retrotransposon%3B refer to Genbank M11339 for full-length element	NA	NA	NA	NA	NA	NA
DDB0220052	3037	ATGAGTCATCAAGGTAGATC	7	GATCAGATTATACTATAATG	5	not_unique	GATC	NA	NA	NA	NA	DDB_G0294344	DDB_G0294346	+	-	594	4173
DDB0220052	5781	AAAATATCCAACAAATGATC	11	GATCCAGATGACCCATGTAA	11	not_unique	GATC	NA	NA	NA	NA	DDB_G0294344	DDB_G0294346	+	-	3338	1429
DDB0220052	6267	TATAAATAAAAATTATGATC	14	GATCACTCAATTTTTTATTT	15	not_unique	GATC	NA	NA	NA	NA	DDB_G0294344	DDB_G0294346	+	-	3824	943
DDB0220052	7526	GAACCGACGATTAATAGATC	22	GATCGTCCAAGTAAGCGATT	3	not_unique	GATC	DDB_G0294346	-	DDB_G0294346_RTE	ORF1%2FORF3 protein fusion fragment of DIRS1 retrotransposon%3B refer to Genbank M11339 for full-length element	NA	NA	NA	NA	NA	NA
DDB0220052	7694	AAGTCTCTGTATTGCGGATC	9	GATCTACTAAAACGTGGAGG	8	not_unique	GATC	DDB_G0294346	-	DDB_G0294346_RTE	ORF1%2FORF3 protein fusion fragment of DIRS1 retrotransposon%3B refer to Genbank M11339 for full-length element	NA	NA	NA	NA	NA	NA
DDB0220052	7832	GTGTTTAACCTTTTTAGATC	6	GATCGAGAACTGGACGATGT	6	not_unique	GATC	DDB_G0294346	-	DDB_G0294346_RTE	ORF1%2FORF3 protein fusion fragment of DIRS1 retrotransposon%3B refer to Genbank M11339 for full-length element	NA	NA	NA	NA	NA	NA
DDB0220052	8247	CCCATTGAAGTTGTTAGATC	1	GATCGGCCATTACTCCCACT	21	unique_one	GATC	DDB_G0294346	-	DDB_G0294346_RTE	ORF1%2FORF3 protein fusion fragment of DIRS1 retrotransposon%3B refer to Genbank M11339 for full-length element	NA	NA	NA	NA	NA	NA
DDB0220052	8459	TCTTTGGTGTATCCTTGATC	19	GATCTTAATTGGTAAGAGTA	20	not_unique	GATC	DDB_G0294346	-	DDB_G0294346_RTE	ORF1%2FORF3 protein fusion fragment of DIRS1 retrotransposon%3B refer to Genbank M11339 for full-length element	NA	NA	NA	NA	NA	NA
DDB0220052	9049	GAAAGGTTGTTGATTTGATC	31	GATCCTCCATTGATTTCATT	24	not_unique	GATC	DDB_G0294346	-	DDB_G0294346_RTE	ORF1%2FORF3 protein fusion fragment of DIRS1 retrotransposon%3B refer to Genbank M11339 for full-length element	NA	NA	NA	NA	NA	NA
DDB0220052	10068	GCTAAAAAAGAAAACTGATC	1	GATCTCATTGAATCCGCCGT	1	unique	GATC	NA	NA	NA	NA	DDB_G0294346	DDB_G0294352	-	-	923	2350
DDB0220052	10766	GCTCTATCTGGCCTAAGATC	1	GATCTGCTGTGTACCGGTCT	1	unique	GATC	NA	NA	NA	NA	DDB_G0294346	DDB_G0294352	-	-	1621	1652
DDB0220052	10786	TGCTGTGTACCGGTCTGATC	1	GATCGATGCCGAGTGTTTAG	1	unique	GATC	NA	NA	NA	NA	DDB_G0294346	DDB_G0294352	-	-	1641	1632
DDB0220052	10979	AGGATTGAAAAAGCTTGATC	1	GATCTTAGTTTAGTTATGGC	1	unique	GATC	NA	NA	NA	NA	DDB_G0294346	DDB_G0294352	-	-	1834	1439
DDB0220052	11111	AAGGCGAAGAAGTTGCGATC	1	GATCGAGTGTTTGAATAGTA	1	unique	GATC	NA	NA	NA	NA	DDB_G0294346	DDB_G0294352	-	-	1966	1307
DDB0220052	11179	CGCACCCTCTAAAGGTGATC	1	GATCCTATTGGGGTCTACAC	1	unique	GATC	NA	NA	NA	NA	DDB_G0294346	DDB_G0294352	-	-	2034	1239
DDB0220052	12165	TTCCCAAAATATAATGGATC	1	GATCCATTGGGGGTAAAAAA	1	unique	GATC	NA	NA	NA	NA	DDB_G0294346	DDB_G0294352	-	-	3020	253
DDB0220052	12590	CTTTCAAATTTATGTTGATC	5	GATCTTGGTTGTTTGTATTG	6	not_unique	GATC	DDB_G0294352	-	DDB_G0294352_TE	ORF1 encoding a protein of unknown function of the putative DNA transposon DDT-B%3B refer to AF298202 for full-length consensus element	NA	NA	NA	NA	NA	NA
DDB0220052	12980	TCTGATGGTGGTAAATGATC	5	GATCTGGAATGATTTTAGCT	5	not_unique	GATC	DDB_G0294352	-	DDB_G0294352_TE	ORF1 encoding a protein of unknown function of the putative DNA transposon DDT-B%3B refer to AF298202 for full-length consensus element	NA	NA	NA	NA	NA	NA
DDB0220052	13031	ATAAAAATTGTAATTTGATC	5	GATCCTTATATTTTTTGAAA	6	not_unique	GATC	DDB_G0294352	-	DDB_G0294352_TE	ORF1 encoding a protein of unknown function of the putative DNA transposon DDT-B%3B refer to AF298202 for full-length consensus element	NA	NA	NA	NA	NA	NA
DDB0220052	13147	TAAATTTTCTACCCAAGATC	5	GATCTGTCATAATCTATAAT	1	unique_one	GATC	DDB_G0294352	-	DDB_G0294352_TE	ORF1 encoding a protein of unknown function of the putative DNA transposon DDT-B%3B refer to AF298202 for full-length consensus element	NA	NA	NA	NA	NA	NA
DDB0220052	13381	GTTAATCCTACAAGATGATC	7	GATCTAAATTCTGGTATATC	5	not_unique	GATC	DDB_G0294352	-	DDB_G0294352_TE	ORF1 encoding a protein of unknown function of the putative DNA transposon DDT-B%3B refer to AF298202 for full-length consensus element	NA	NA	NA	NA	NA	NA
DDB0220052	16580	TGTAACTTTTCTTCCTGATC	10	GATCTAGTTGTTTTAATTTG	8	not_unique	GATC	DDB_G0294358	-	DDB_G0294358_RTE	ORF2 encoding reverse transcriptase (RT) and integrase (IN) proteins of long terminal repeat retrotransposon Skipper%3B refer to AF049230 for consensus element	NA	NA	NA	NA	NA	NA
DDB0220052	16608	TTAATTTGTAAACTAAGATC	11	GATCAAGTTCATCATCATCA	10	not_unique	GATC	DDB_G0294358	-	DDB_G0294358_RTE	ORF2 encoding reverse transcriptase (RT) and integrase (IN) proteins of long terminal repeat retrotransposon Skipper%3B refer to AF049230 for consensus element	NA	NA	NA	NA	NA	NA
DDB0220052	16882	CTGTATCGACTTCTTTGATC	7	GATCCATTCAGGTTCTGGGT	8	not_unique	GATC	DDB_G0294358	-	DDB_G0294358_RTE	ORF2 encoding reverse transcriptase (RT) and integrase (IN) proteins of long terminal repeat retrotransposon Skipper%3B refer to AF049230 for consensus element	NA	NA	NA	NA	NA	NA
DDB0220052	17052	TATAGTTTTACGATTTGATC	7	GATCCTTGTTGAACACATTG	4	not_unique	GATC	DDB_G0294358	-	DDB_G0294358_RTE	ORF2 encoding reverse transcriptase (RT) and integrase (IN) proteins of long terminal repeat retrotransposon Skipper%3B refer to AF049230 for consensus element	NA	NA	NA	NA	NA	NA
DDB0220052	17175	AGTTTGTGAGAGATTAGATC	8	GATCTTTTGAAATGTTAGTT	1	unique_one	GATC	DDB_G0294358	-	DDB_G0294358_RTE	ORF2 encoding reverse transcriptase (RT) and integrase (IN) proteins of long terminal repeat retrotransposon Skipper%3B refer to AF049230 for consensus element	NA	NA	NA	NA	NA	NA
DDB0220052	17640	TCTGAAAGGAATCTTGGATC	8	GATCTCTATCGGAGACGATT	10	not_unique	GATC	DDB_G0294358	-	DDB_G0294358_RTE	ORF2 encoding reverse transcriptase (RT) and integrase (IN) proteins of long terminal repeat retrotransposon Skipper%3B refer to AF049230 for consensus element	NA	NA	NA	NA	NA	NA
DDB0220052	17790	ACAATGACACAAACTTGATC	9	GATCGACTTCAACTGTAAAT	9	not_unique	GATC	NA	NA	NA	NA	DDB_G0294358	DDB_G0294360	-	-	36	5
DDB0220052	18612	TTACCAAAAGGGATTCGATC	34	GATCCCCCGACCCTCTATCA	29	not_unique	GATC	NA	NA	NA	NA	DDB_G0294360	DDB_G0294362	-	+	498	2419
DDB0220052	18729	TTTTGTTCTAAAATTAGATC	21	GATCTTTTTTATTAAAAACC	36	not_unique	GATC	NA	NA	NA	NA	DDB_G0294360	DDB_G0294362	-	+	615	2302
DDB0220052	19333	AGCAAATTTTAAAAAAGATC	1	GATCGAGTTATCCGGAATAA	1	unique	GATC	NA	NA	NA	NA	DDB_G0294360	DDB_G0294362	-	+	1219	1698
DDB0220052	19737	TTTTCGCGAAAAGATTGATC	9	GATCTTTTCTGGGATAACTC	1	unique_one	GATC	NA	NA	NA	NA	DDB_G0294360	DDB_G0294362	-	+	1623	1294
DDB0220052	19757	TTTTCTGGGATAACTCGATC	1	GATCTTTTTCAAAATAACTT	19	unique_one	GATC	NA	NA	NA	NA	DDB_G0294360	DDB_G0294362	-	+	1643	1274
DDB0220052	20645	GGTACAATGGCCAAAGGATC	3	GATCAACACACAGCGAAGAA	1	unique_one	GATC	NA	NA	NA	NA	DDB_G0294360	DDB_G0294362	-	+	2531	386
DDB0220052	21014	GTCTGGTGTTCCAATTGATC	1	GATCAACAAACATTACTGAT	1	unique	GATC	NA	NA	NA	NA	DDB_G0294360	DDB_G0294362	-	+	2900	17
DDB0220052	21031	ATCAACAAACATTACTGATC	1	GATCAATTGGAACACCAATT	2	unique_one	GATC	NA	NA	NA	NA	NA	NA	NA	NA	NA	NA
DDB0220052	21097	AAAGAAAGAATTGGATGATC	3	GATCAAGAATGGAAGAGAAA	3	not_unique	GATC	DDB_G0294362	+	DDB_G0294362_ps	putative pseudogene%3B fragment%2C nearly identical to %3Ca href%3D%22%2Fgene%2FDDB_G0295683%22%3EDDB_G0295683%3C%2Fa%3E	NA	NA	NA	NA	NA	NA
DDB0220052	21136	ACAACAATATCAATCTGATC	3	GATCTTCAATTGGAAAAAGA	3	not_unique	GATC	DDB_G0294362	+	DDB_G0294362_ps	putative pseudogene%3B fragment%2C nearly identical to %3Ca href%3D%22%2Fgene%2FDDB_G0295683%22%3EDDB_G0295683%3C%2Fa%3E	NA	NA	NA	NA	NA	NA
DDB0220052	21415	TGAACAAGAACAACGTGATC	3	GATCTAGAAGAACGTATTCA	3	not_unique	GATC	DDB_G0294362	+	DDB_G0294362_ps	putative pseudogene%3B fragment%2C nearly identical to %3Ca href%3D%22%2Fgene%2FDDB_G0295683%22%3EDDB_G0295683%3C%2Fa%3E	NA	NA	NA	NA	NA	NA
DDB0220052	21454	AGAACAAAAAGAAAAAGATC	3	GATCAAAGAGAAAAGCAAGA	1	unique_one	GATC	DDB_G0294362	+	DDB_G0294362_ps	putative pseudogene%3B fragment%2C nearly identical to %3Ca href%3D%22%2Fgene%2FDDB_G0295683%22%3EDDB_G0295683%3C%2Fa%3E	NA	NA	NA	NA	NA	NA
DDB0220052	21472	TCAAAGAGAAAAGCAAGATC	1	GATCAATTGGCTCAAATGGA	4	unique_one	GATC	DDB_G0294362	+	DDB_G0294362_ps	putative pseudogene%3B fragment%2C nearly identical to %3Ca href%3D%22%2Fgene%2FDDB_G0295683%22%3EDDB_G0295683%3C%2Fa%3E	NA	NA	NA	NA	NA	NA
DDB0220052	21739	AAAAGAAATGTTTGTTGATC	1	GATCAATTGGAACACCAAAT	1	unique	GATC	DDB_G0294362	+	DDB_G0294362_ps	putative pseudogene%3B fragment%2C nearly identical to %3Ca href%3D%22%2Fgene%2FDDB_G0295683%22%3EDDB_G0295683%3C%2Fa%3E	NA	NA	NA	NA	NA	NA
DDB0220052	22012	GAAGATAATGTTTGTTGATC	1	GATCAATTGGAACACCAATT	2	unique_one	GATC	DDB_G0294364	+	DDB_G0294364_ps	putative pseudogene%3B fragment%2C nearly identical to %3Ca href%3D%22%2Fgene%2FDDB_G0295683%22%3EDDB_G0295683%3C%2Fa%3E	NA	NA	NA	NA	NA	NA
DDB0220052	22078	AAAGAAAGAATTGGATGATC	3	GATCAAGAATGGAAGAGAAA	3	not_unique	GATC	DDB_G0294364	+	DDB_G0294364_ps	putative pseudogene%3B fragment%2C nearly identical to %3Ca href%3D%22%2Fgene%2FDDB_G0295683%22%3EDDB_G0295683%3C%2Fa%3E	NA	NA	NA	NA	NA	NA
DDB0220052	22117	ACAACAATATCAATCTGATC	3	GATCTTCAATTGGAAAAAGA	3	not_unique	GATC	DDB_G0294364	+	DDB_G0294364_ps	putative pseudogene%3B fragment%2C nearly identical to %3Ca href%3D%22%2Fgene%2FDDB_G0295683%22%3EDDB_G0295683%3C%2Fa%3E	NA	NA	NA	NA	NA	NA
DDB0220052	22396	TGAACAAGAACAACGTGATC	3	GATCTAGAAGAACGTATTCA	3	not_unique	GATC	DDB_G0294364	+	DDB_G0294364_ps	putative pseudogene%3B fragment%2C nearly identical to %3Ca href%3D%22%2Fgene%2FDDB_G0295683%22%3EDDB_G0295683%3C%2Fa%3E	NA	NA	NA	NA	NA	NA
DDB0220052	22435	AGAACAAAAAGAAAAAGATC	3	GATCAAAGAGAAAAACAAGA	2	not_unique	GATC	DDB_G0294364	+	DDB_G0294364_ps	putative pseudogene%3B fragment%2C nearly identical to %3Ca href%3D%22%2Fgene%2FDDB_G0295683%22%3EDDB_G0295683%3C%2Fa%3E	NA	NA	NA	NA	NA	NA
DDB0220052	22453	TCAAAGAGAAAAACAAGATC	2	GATCAATTGGCTCAAATGGA	4	not_unique	GATC	DDB_G0294364	+	DDB_G0294364_ps	putative pseudogene%3B fragment%2C nearly identical to %3Ca href%3D%22%2Fgene%2FDDB_G0295683%22%3EDDB_G0295683%3C%2Fa%3E	NA	NA	NA	NA	NA	NA
DDB0220052	22719	CAAAAGAGAAAAACAAGATC	1	GATCAATTGGCTCAAATGGA	4	unique_one	GATC	DDB_G0294364	+	DDB_G0294364_ps	putative pseudogene%3B fragment%2C nearly identical to %3Ca href%3D%22%2Fgene%2FDDB_G0295683%22%3EDDB_G0295683%3C%2Fa%3E	NA	NA	NA	NA	NA	NA
DDB0220052	23756	TAAAAAATTGTAACAAGATC	1	GATCTCAAAAATATCTTGTT	6	unique_one	GATC	NA	NA	NA	NA	DDB_G0294364	DDB_G0294366	+	+	1016	256
DDB0220052	25127	ATTAGACTTTTAAAAGGATC	2	GATCAATACGTACGGATGCC	2	not_unique	GATC	DDB_G0294368	+	DDB_G0294368	NA	NA	NA	NA	NA	NA	NA
DDB0220052	25189	GGTACAATGGCCAAAGGATC	3	GATCAACAGGATTTTCTAAT	2	not_unique	GATC	DDB_G0294368	+	DDB_G0294368	NA	NA	NA	NA	NA	NA	NA
DDB0220052	25524	ACAGATGGATACAATCGATC	1	GATCATAAAAGAGTGCGAGG	1	unique	GATC	NA	NA	NA	NA	DDB_G0294368	DDB_G0294370	+	+	236	105
DDB0220052	25798	ACTGTCACAGAAATAAGATC	3	GATCTTTTCTTGGAAGTTGT	3	not_unique	GATC	DDB_G0294370	+	DDB_G0294370_RTE	ORF2 encoding reverse transcriptase (RT) and RNaseH of long terminal repeat retrotransposon DGLT-B%3B refer to AF474004 for full-length consensus element	NA	NA	NA	NA	NA	NA
DDB0220052	26211	GTTCAGGTTGTTTACAGATC	1	GATCACTTAAACTTGACATA	1	unique	GATC	DDB_G0294370	+	DDB_G0294370_RTE	ORF2 encoding reverse transcriptase (RT) and RNaseH of long terminal repeat retrotransposon DGLT-B%3B refer to AF474004 for full-length consensus element	NA	NA	NA	NA	NA	NA
DDB0220052	26518	ATAGACGCCAAAACAGGATC	1	GATCCAAGAGATTACTACTG	1	unique	GATC	DDB_G0294370	+	DDB_G0294370_RTE	ORF2 encoding reverse transcriptase (RT) and RNaseH of long terminal repeat retrotransposon DGLT-B%3B refer to AF474004 for full-length consensus element	NA	NA	NA	NA	NA	NA
DDB0220052	27383	CAAATACGAGGTTGGTGATC	1	GATCTTGTTTTGGTAAAGAG	1	unique	GATC	DDB_G0294372	+	DDB_G0294372_RTE	ORF3 encoding the integrase protein of long terminal repeat retrotransposon DGLT-B%3B refer to AF474004 for full-length consensus element	NA	NA	NA	NA	NA	NA
DDB0220052	27437	GATGATAAATGATAAGGATC	1	GATCAAAGTAAAGTCTTACC	1	unique	GATC	DDB_G0294372	+	DDB_G0294372_RTE	ORF3 encoding the integrase protein of long terminal repeat retrotransposon DGLT-B%3B refer to AF474004 for full-length consensus element	NA	NA	NA	NA	NA	NA
DDB0220052	27517	TCAACTACTCAATAAGGATC	1	GATCCAGAACCATAAGGGTG	1	unique	GATC	DDB_G0294372	+	DDB_G0294372_RTE	ORF3 encoding the integrase protein of long terminal repeat retrotransposon DGLT-B%3B refer to AF474004 for full-length consensus element	NA	NA	NA	NA	NA	NA
DDB0220052	27584	ACCGTTCATAGAAGATGATC	1	GATCGTAGAATATTCAAGAG	1	unique	GATC	DDB_G0294372	+	DDB_G0294372_RTE	ORF3 encoding the integrase protein of long terminal repeat retrotransposon DGLT-B%3B refer to AF474004 for full-length consensus element	NA	NA	NA	NA	NA	NA
DDB0220052	27724	CATAGGTAAAACTGAAGATC	1	GATCACGATATGTGGTTACC	1	unique	GATC	NA	NA	NA	NA	DDB_G0294372	DDB_G0294374	+	+	57	480
DDB0220052	28054	AATTCATCCGAGCGTCGATC	1	GATCACCTACCAAATTGCAG	1	unique	GATC	NA	NA	NA	NA	DDB_G0294372	DDB_G0294374	+	+	387	150
DDB0220052	28566	AACGTCAAAAATTCTTGATC	1	GATCCGAAAGGAATCAACGG	1	unique	GATC	DDB_G0294374	+	DDB_G0294374_RTE	ORF4 encoding a zinc finger-containing protein of unknown function of long terminal repeat retrotransposon DGLT-B%3B refer to AF474004 for full-length consensus element	NA	NA	NA	NA	NA	NA
DDB0220052	29832	GTGAATTATCTACAATGATC	1	GATCGTTGATTTTAGATCTC	1	unique	GATC	DDB_G0294376	-	fcpA	shares a short region of similarity with H. sapiens small CTD phosphatase 2	NA	NA	NA	NA	NA	NA
DDB0220052	29846	ATGATCGTTGATTTTAGATC	1	GATCTCTACCTAATCTACTT	1	unique	GATC	DDB_G0294376	-	fcpA	shares a short region of similarity with H. sapiens small CTD phosphatase 2	NA	NA	NA	NA	NA	NA
DDB0220052	29867	CTACCTAATCTACTTAGATC	1	GATCTTTAACGTAGTTTCCT	1	unique	GATC	DDB_G0294376	-	fcpA	shares a short region of similarity with H. sapiens small CTD phosphatase 2	NA	NA	NA	NA	NA	NA
DDB0220052	30392	TTATTACCATTGTTTTGATC	1	GATCATTTGATGGAACGAAA	1	unique	GATC	DDB_G0294376	-	fcpA	shares a short region of similarity with H. sapiens small CTD phosphatase 2	NA	NA	NA	NA	NA	NA
DDB0220052	31990	AAAAAATCAATTTTTAGATC	1	GATCAAACACACCAACACCC	1	unique	GATC	NA	NA	NA	NA	DDB_G0294376	DDB_G0294667	-	+	1415	1511
DDB0220052	32192	ATAATTATTATGATTTGATC	1	GATCGTATGATGTGTGAGTG	1	unique	GATC	NA	NA	NA	NA	DDB_G0294376	DDB_G0294667	-	+	1617	1309
DDB0220052	33559	AAGAGGTCATGAGTTCGATC	18	GATCCTCATAGGAGCCTTTT	13	not_unique	GATC	DDB_G0294667	+	tRNA-Thr-AGU-1	transfers a threonine residue to a growing polypeptide chain during protein synthesis%0A	NA	NA	NA	NA	NA	NA
DDB0220052	33597	ATTGAAAAACAAAATAGATC	1	GATCGAAGGTTCGATTCCCC	1	unique	GATC	NA	NA	NA	NA	DDB_G0294667	DDB_G0294669	+	-	25	380
DDB0220052	33993	AAAAGGCTCCTATGAGGATC	13	GATCGAACTCATGACCTCTT	18	not_unique	GATC	DDB_G0294669	-	tRNA-Thr-AGU-2	transfers a threonine residue to a growing polypeptide chain during protein synthesis%0A	NA	NA	NA	NA	NA	NA
DDB0220052	36069	CAATGAAATTATAATGGATC	3	GATCAAAATGAAGCAAACAT	3	not_unique	GATC	DDB_G0294382	+	DDB_G0294382	NA	NA	NA	NA	NA	NA	NA
DDB0220052	36395	TATAAATAAATATTATGATC	1	GATCACTCAATTTTTTATTT	15	unique_one	GATC	NA	NA	NA	NA	DDB_G0294382	DDB_G0294384	+	+	225	178
DDB0220052	36715	TTGGTTACTTAATTTTGATC	1	GATCAAACAATTAGGGCATT	1	unique	GATC	DDB_G0294384	+	DDB_G0294384_TE	ORF1 encoding a protein of unknown function of the putative DNA transposon DDT-A%3B refer to AF298201 for full-length consensus element	NA	NA	NA	NA	NA	NA
DDB0220052	37288	AAAGGAAGAGAGAATAGATC	10	GATCAATATTATATTACCTT	10	not_unique	GATC	DDB_G0294384	+	DDB_G0294384_TE	ORF1 encoding a protein of unknown function of the putative DNA transposon DDT-A%3B refer to AF298201 for full-length consensus element	NA	NA	NA	NA	NA	NA
DDB0220052	40240	CAAACAATTGGTATTAGATC	1	GATCAGAAGTTAAAAATTAT	1	unique	GATC	DDB_G0294388	+	DDB_G0294388	NA	NA	NA	NA	NA	NA	NA
DDB0220052	40368	AGGTTCAACTGGTTCTGATC	1	GATCAATGTGGTCCATCAAA	1	unique	GATC	DDB_G0294388	+	DDB_G0294388	NA	NA	NA	NA	NA	NA	NA
DDB0220052	41121	TGAAGAAAAAATAGGTGATC	1	GATCTACCAATTTTATCATC	1	unique	GATC	DDB_G0294388	+	DDB_G0294388	NA	NA	NA	NA	NA	NA	NA
DDB0220052	42679	CAAAATTTTTTTAGGGGATC	1	GATCCCTTTTTTTACAGGAG	1	unique	GATC	NA	NA	NA	NA	DDB_G0294388	end	+	NA	161	33053
DDB0220052	42862	AGTAATAAAAAATTATGATC	3	GATCTAAAAGTTTTACACAG	3	not_unique	GATC	NA	NA	NA	NA	DDB_G0294388	end	+	NA	344	32870
DDB0220052	45125	AGTTACTTTATTATAGGATC	3	GATCATATATATGCATTATT	3	not_unique	GATC	NA	NA	NA	NA	DDB_G0294388	end	+	NA	2607	30607
DDB0220052	45819	TTATTATCATTAGATAGATC	3	GATCTAATTCGGGGCTATTT	3	not_unique	GATC	NA	NA	NA	NA	DDB_G0294388	end	+	NA	3301	29913
DDB0220052	46015	AAATTGATAATTCAATGATC	3	GATCGTATTTGTAGTCAAAT	3	not_unique	GATC	NA	NA	NA	NA	DDB_G0294388	end	+	NA	3497	29717
DDB0220052	46492	CAACCACATAATGATAGATC	3	GATCATGAATTTTTAAATAT	3	not_unique	GATC	NA	NA	NA	NA	DDB_G0294388	end	+	NA	3974	29240
DDB0220052	46548	TTAAATCATGTAATTTGATC	3	GATCAATATTGATATCTAAA	3	not_unique	GATC	NA	NA	NA	NA	DDB_G0294388	end	+	NA	4030	29184
DDB0220052	47163	AGAACTTTTAATTTTGGATC	3	GATCGATTTGTGGTATTTTT	3	not_unique	GATC	NA	NA	NA	NA	DDB_G0294388	end	+	NA	4645	28569
DDB0220052	47570	GGATATGAAATATAGAGATC	3	GATCAGTTGTCCGACGGTTC	3	not_unique	GATC	NA	NA	NA	NA	DDB_G0294388	end	+	NA	5052	28162
DDB0220052	47766	AGTCACCGACTTAAATGATC	3	GATCACATTTTGAAGGGTTT	3	not_unique	GATC	NA	NA	NA	NA	DDB_G0294388	end	+	NA	5248	27966
DDB0220052	47966	CTTTTAATTTTGCATCGATC	3	GATCTATGGTAGTATCATAT	3	not_unique	GATC	NA	NA	NA	NA	DDB_G0294388	end	+	NA	5448	27766
DDB0220052	48025	AGGTCATAGGTTTCTGGATC	3	GATCGATCCCATTGTCACCA	3	not_unique	GATC	NA	NA	NA	NA	DDB_G0294388	end	+	NA	5507	27707
DDB0220052	48029	CATAGGTTTCTGGATCGATC	3	GATCCCATTGTCACCACTAT	3	not_unique	GATC	NA	NA	NA	NA	DDB_G0294388	end	+	NA	5511	27703
DDB0220052	50471	TTAATTTTGGTAAATAGATC	6	GATCTCAAAAAATAAAAAAT	6	not_unique	GATC	NA	NA	NA	NA	DDB_G0294388	end	+	NA	7953	25261
DDB0220052	51242	TTAATTTTGGTAAATAGATC	6	GATCTCAAAAAATAAAAAAT	6	not_unique	GATC	NA	NA	NA	NA	DDB_G0294388	end	+	NA	8724	24490
DDB0220052	53185	TATATGTCATATTGTAGATC	3	GATCAGCTTCTCTAGTTTAT	6	not_unique	GATC	NA	NA	NA	NA	DDB_G0294388	end	+	NA	10667	22547
DDB0220052	53904	TTTTTGGAAATACTTGGATC	6	GATCGAAAAAAAAATTTTTG	3	not_unique	GATC	NA	NA	NA	NA	DDB_G0294388	end	+	NA	11386	21828
DDB0220052	56713	TATATGTCAGATTGTAGATC	3	GATCAGCTTCTCTAGTTTAT	6	not_unique	GATC	NA	NA	NA	NA	DDB_G0294388	end	+	NA	14195	19019
DDB0220052	57432	TTTTTGGAAATACTTGGATC	6	GATCGAAAAAAAATTTTTTG	3	not_unique	GATC	NA	NA	NA	NA	DDB_G0294388	end	+	NA	14914	18300
DDB0220052	59543	GTCATTGGTCTATTGTGATC	3	GATCAAATGGCCGGCTGTCT	3	not_unique	GATC	NA	NA	NA	NA	DDB_G0294388	end	+	NA	17025	16189
DDB0220052	60148	TAAAAAATTAATATGGGATC	4	GATCATATTAAAAATTAATA	4	not_unique	GATC	NA	NA	NA	NA	DDB_G0294388	end	+	NA	17630	15584
DDB0220052	60501	TAGGTAAGGTAAATGTGATC	4	GATCAAATAGTTTTTAAATA	4	not_unique	GATC	NA	NA	NA	NA	DDB_G0294388	end	+	NA	17983	15231
DDB0220052	64840	CATATGAGCTGTCGGCGATC	3	GATCTACTGCACCGCCTATA	3	not_unique	GATC	NA	NA	NA	NA	DDB_G0294388	end	+	NA	22322	10892
DDB0220052	65793	CGAGGTTCCTTCACTGGATC	3	GATCGGTAGTTGCTGGGTGG	3	not_unique	GATC	NA	NA	NA	NA	DDB_G0294388	end	+	NA	23275	9939
DDB0220052	66041	GGAGGAGCAATAAGGAGATC	3	GATCTGTTGGCAAAGTGCTG	3	not_unique	GATC	NA	NA	NA	NA	DDB_G0294388	end	+	NA	23523	9691
DDB0220052	66160	GTAATAAAAGTGACGGGATC	3	GATCTAATCCTGTAATTTTG	3	not_unique	GATC	NA	NA	NA	NA	DDB_G0294388	end	+	NA	23642	9572
DDB0220052	66295	ACATGCTTAACTGGTTGATC	3	GATCCTGCCAGTAGTCATAT	3	not_unique	GATC	NA	NA	NA	NA	DDB_G0294388	end	+	NA	23777	9437
DDB0220052	66550	ACCGAATAATATTGCAGATC	3	GATCGAGGATTTATCTTCGA	3	not_unique	GATC	NA	NA	NA	NA	DDB_G0294388	end	+	NA	24032	9182
DDB0220052	67070	AAGCAGGCGTCTCGCTGATC	3	GATCTTTTGCAGCATGGTAT	3	not_unique	GATC	NA	NA	NA	NA	DDB_G0294388	end	+	NA	24552	8662
DDB0220052	67266	AGAACGAAAGTTTGGGGATC	3	GATCGAAGACGATCAGATAC	3	not_unique	GATC	NA	NA	NA	NA	DDB_G0294388	end	+	NA	24748	8466
DDB0220052	67276	TTTGGGGATCGAAGACGATC	3	GATCAGATACCGTCGTAGTC	3	not_unique	GATC	NA	NA	NA	NA	DDB_G0294388	end	+	NA	24758	8456
DDB0220052	67321	AACTATGTCGACCAGGGATC	3	GATCGGTTAAAATTTTTTCA	3	not_unique	GATC	NA	NA	NA	NA	DDB_G0294388	end	+	NA	24803	8411
DDB0220052	67524	GATTGACAGACTAAAAGATC	3	GATCTTTCATGATTCTATAA	3	not_unique	GATC	NA	NA	NA	NA	DDB_G0294388	end	+	NA	25006	8208
DDB0220052	67906	CTACGTAACTGGGCTTGATC	3	GATCTTTGTAATTATTGATC	3	not_unique	GATC	NA	NA	NA	NA	DDB_G0294388	end	+	NA	25388	7826
DDB0220052	67922	GATCTTTGTAATTATTGATC	3	GATCATAAACGAGGAATTCC	3	not_unique	GATC	NA	NA	NA	NA	DDB_G0294388	end	+	NA	25404	7810
DDB0220052	68014	GCCCGTCGCTCCTACCGATC	3	GATCGAATGATACGGTAAAG	3	not_unique	GATC	NA	NA	NA	NA	DDB_G0294388	end	+	NA	25496	7718
DDB0220052	68040	TACGGTAAAGTTAACGGATC	3	GATCGTTTTATCTGTGGCAA	3	not_unique	GATC	NA	NA	NA	NA	DDB_G0294388	end	+	NA	25522	7692
DDB0220052	68148	GGTGAACCTGCGGATGGATC	3	GATCATTTTTTATCTTAATA	3	not_unique	GATC	NA	NA	NA	NA	DDB_G0294388	end	+	NA	25630	7584
DDB0220052	69050	GAAAGCTATTAGAAAGGATC	4	GATCAATTGTGTTGATTCGA	4	not_unique	GATC	NA	NA	NA	NA	DDB_G0294388	end	+	NA	26532	6682
DDB0220052	69168	TTGCAGTAGCAGGTAAGATC	4	GATCTGCGTAATACTAGTAC	4	not_unique	GATC	NA	NA	NA	NA	DDB_G0294388	end	+	NA	26650	6564
DDB0220052	69334	CCAAGGTTCAAACCTGGATC	4	GATCTCTTCGAGGTTAGGTG	4	not_unique	GATC	NA	NA	NA	NA	DDB_G0294388	end	+	NA	26816	6398
DDB0220052	69548	TAAATATATGTTAGGAGATC	4	GATCGATAGCATACAAGTAC	4	not_unique	GATC	NA	NA	NA	NA	DDB_G0294388	end	+	NA	27030	6184
DDB0220052	69710	TAGAGTGTTACGTGCTGATC	4	GATCAAAAGGTAACGGACAT	3	not_unique	GATC	NA	NA	NA	NA	DDB_G0294388	end	+	NA	27192	6022
DDB0220052	69789	AGTTACTAACGGGTGAGATC	4	GATCTGATGTTTATAAAATG	3	not_unique	GATC	NA	NA	NA	NA	DDB_G0294388	end	+	NA	27271	5943
DDB0220052	70056	CCCGTCTTGAAACACGGATC	3	GATCAAGGAGGCCGTTTTGT	3	not_unique	GATC	NA	NA	NA	NA	DDB_G0294388	end	+	NA	27538	5676
DDB0220052	70135	AAAGAATACTCCAAAAGATC	3	GATCGTAACTACGGTTACCT	3	not_unique	GATC	NA	NA	NA	NA	DDB_G0294388	end	+	NA	27617	5597
DDB0220052	70879	AGTTGTCTTTAGTGCAGATC	3	GATCTTGATGGTAGTAGCAA	3	not_unique	GATC	NA	NA	NA	NA	DDB_G0294388	end	+	NA	28361	4853
DDB0220052	70975	CACTTATGGGTGAGTCGATC	3	GATCCTAAGGTTTGGGTTAA	3	not_unique	GATC	NA	NA	NA	NA	DDB_G0294388	end	+	NA	28457	4757
DDB0220052	71024	GGTTACTAGGTCATTGGATC	3	GATCGAAAGTGAAGGTGGCT	3	not_unique	GATC	NA	NA	NA	NA	DDB_G0294388	end	+	NA	28506	4708
DDB0220052	71122	GGATATTAGGGTAACCGATC	3	GATCGTAATCCGGGACATCA	3	not_unique	GATC	NA	NA	NA	NA	DDB_G0294388	end	+	NA	28604	4610
DDB0220052	71405	GGAAGTCGGCAAAACCGATC	3	GATCTGTAACTTCGGGATAA	3	not_unique	GATC	NA	NA	NA	NA	DDB_G0294388	end	+	NA	28887	4327
DDB0220052	71591	AATTTAGAACTGTGACGATC	3	GATCACCGGGAATCCAACTG	3	not_unique	GATC	NA	NA	NA	NA	DDB_G0294388	end	+	NA	29073	4141
DDB0220052	71791	GTGACGCGCATGAATGGATC	3	GATCAATGAGATTCCCACTG	3	not_unique	GATC	NA	NA	NA	NA	DDB_G0294388	end	+	NA	29273	3941
DDB0220052	72047	TTTTGGTGAATAAGCGGATC	3	GATCAACCACGGGTGAAATC	3	not_unique	GATC	NA	NA	NA	NA	DDB_G0294388	end	+	NA	29529	3685
DDB0220052	72303	GAAACCAGGGCCTATCGATC	3	GATCCTTTATGTGCTTAAAT	3	not_unique	GATC	NA	NA	NA	NA	DDB_G0294388	end	+	NA	29785	3429
DDB0220052	72405	AGCGACGCTGCTTTTTGATC	3	GATCCTTCGATGTCGGCTCT	3	not_unique	GATC	NA	NA	NA	NA	DDB_G0294388	end	+	NA	29887	3327
DDB0220052	72590	AGGAACTGTCATGCCGGATC	3	GATCACTGGTCTGTAGGTTT	3	not_unique	GATC	NA	NA	NA	NA	DDB_G0294388	end	+	NA	30072	3142
DDB0220052	73665	GCTGGTGGTAGTATACGATC	1	GATCTTTTGCTCGTATTGGC	3	unique_one	GATC	NA	NA	NA	NA	DDB_G0294388	end	+	NA	31147	2067
DDB0220052	74420	ACAACTTCCAAGAAAAGATC	3	GATCTTATTTCTGTGACAGT	3	not_unique	GATC	NA	NA	NA	NA	DDB_G0294388	end	+	NA	31902	1312
DDB0220052	74677	CCTTGAACTCTTCAATGATC	2	GATCGATTGTATCCATTTGT	2	not_unique	GATC	NA	NA	NA	NA	DDB_G0294388	end	+	NA	32159	1055
DDB0220052	75442	TTACCAAAAGGGATTCGATC	34	GATCCCCCCGACCCTCTATC	2	not_unique	GATC	NA	NA	NA	NA	DDB_G0294388	end	+	NA	32924	290
DDB0220052	75546	TTTATCCCATTTTTTTGATC	2	GATCTATAATTAGATGTTTT	1	unique_one	GATC	NA	NA	NA	NA	DDB_G0294388	end	+	NA	33028	186
DDB0232428	1374	TATTTAAAAACTATTTGATC	4	GATCACATTTACCTTACCTA	4	not_unique	GATC	NA	NA	NA	NA	start	DDB_G0267178	NA	+	1373	516
DDB0232428	1727	TATTAATTTTTAATATGATC	4	GATCCCATATTAATTTTTTA	4	not_unique	GATC	NA	NA	NA	NA	start	DDB_G0267178	NA	+	1726	163
DDB0232428	2026	CGGTCAAATACAGATGGATC	23	GATCTGTTCGCATCTCACCT	19	not_unique	GATC	DDB_G0267178	+	DDB_G0267178_RTE	ORF2 protein fragment of DIRS1 retrotransposon%3B refer to Genbank M11339 for full-length element	NA	NA	NA	NA	NA	NA
DDB0232428	2205	AGGTTTCTATAATACTGATC	19	GATCTTCCCAATCTGGAGAT	23	not_unique	GATC	DDB_G0267178	+	DDB_G0267178_RTE	ORF2 protein fragment of DIRS1 retrotransposon%3B refer to Genbank M11339 for full-length element	NA	NA	NA	NA	NA	NA
DDB0232428	2222	ATCTTCCCAATCTGGAGATC	23	GATCAGCAACTTGGTATCCG	22	not_unique	GATC	DDB_G0267178	+	DDB_G0267178_RTE	ORF2 protein fragment of DIRS1 retrotransposon%3B refer to Genbank M11339 for full-length element	NA	NA	NA	NA	NA	NA
DDB0232428	2679	AACTGATATTGTTAATGATC	22	GATCCATTCATTACAAGAAT	11	not_unique	GATC	DDB_G0267178	+	DDB_G0267178_RTE	ORF2 protein fragment of DIRS1 retrotransposon%3B refer to Genbank M11339 for full-length element	NA	NA	NA	NA	NA	NA
DDB0232428	2866	ATGTTTGGTTTAGCAAGATC	21	GATCATCAGACTTGGTGAAG	21	not_unique	GATC	DDB_G0267178	+	DDB_G0267178_RTE	ORF2 protein fragment of DIRS1 retrotransposon%3B refer to Genbank M11339 for full-length element	NA	NA	NA	NA	NA	NA
DDB0232428	3263	ACGTTGTCAAGAAGATGATC	1	GATCGTTGGAAATCAAATGA	1	unique	GATC	DDB_G0267178	+	DDB_G0267178_RTE	ORF2 protein fragment of DIRS1 retrotransposon%3B refer to Genbank M11339 for full-length element	NA	NA	NA	NA	NA	NA
DDB0232428	3947	AATGAAATCAATGGAGGATC	24	GATCAAATCAACAACCTTTC	31	not_unique	GATC	DDB_G0267180	+	DDB_G0267180_RTE	ORF1 protein of DIRS1 retrotransposon%3B refer to Genbank M11339 for full-length element	NA	NA	NA	NA	NA	NA
DDB0232428	4543	TACTCTTACCAATTAAGATC	20	GATCAAGGATACACCAAAGA	19	not_unique	GATC	DDB_G0267180	+	DDB_G0267180_RTE	ORF1 protein of DIRS1 retrotransposon%3B refer to Genbank M11339 for full-length element	NA	NA	NA	NA	NA	NA
DDB0232428	4755	AGTGGGAGTAATGGCCGATC	21	GATCTAACAACTTCAATGGA	22	not_unique	GATC	DDB_G0267180	+	DDB_G0267180_RTE	ORF1 protein of DIRS1 retrotransposon%3B refer to Genbank M11339 for full-length element	NA	NA	NA	NA	NA	NA
DDB0232428	4773	TCTAACAACTTCAATGGATC	22	GATCACCAAGTAATGTTGCA	17	not_unique	GATC	DDB_G0267180	+	DDB_G0267180_RTE	ORF1 protein of DIRS1 retrotransposon%3B refer to Genbank M11339 for full-length element	NA	NA	NA	NA	NA	NA
DDB0232428	5308	CCTACACGTGTTAGTAGATC	4	GATCCACAATACAGAGACTT	11	not_unique	GATC	NA	NA	NA	NA	DDB_G0267180	DDB_G0267182	+	+	453	197
DDB0232428	5476	CATCGCTTACTTGGACGATC	17	GATCTATTAATCGTCGGTTC	22	not_unique	GATC	NA	NA	NA	NA	DDB_G0267180	DDB_G0267182	+	+	621	29
DDB0232428	5848	AGCCAATGGAGATTGGGATC	16	GATCAATCATTCCCCATTCC	15	not_unique	GATC	DDB_G0267182	+	DDB_G0267182_RTE	ORF2 protein fragment of DIRS1 retrotransposon%3B refer to Genbank M11339 for full-length element	NA	NA	NA	NA	NA	NA
DDB0232428	6208	GGGTGGTCAGATACAGGATC	4	GATCTCTCAGTTCTGTTCGA	17	not_unique	GATC	DDB_G0267182	+	DDB_G0267182_RTE	ORF2 protein fragment of DIRS1 retrotransposon%3B refer to Genbank M11339 for full-length element	NA	NA	NA	NA	NA	NA
DDB0232428	6433	CGGTCAAATACAGATGGATC	23	GATCTGTTCGCATCTCACCT	19	not_unique	GATC	DDB_G0267182	+	DDB_G0267182_RTE	ORF2 protein fragment of DIRS1 retrotransposon%3B refer to Genbank M11339 for full-length element	NA	NA	NA	NA	NA	NA
DDB0232428	6612	AGGTTTCTATAATACTGATC	19	GATCTTCCCAATCTGGAGAT	23	not_unique	GATC	DDB_G0267182	+	DDB_G0267182_RTE	ORF2 protein fragment of DIRS1 retrotransposon%3B refer to Genbank M11339 for full-length element	NA	NA	NA	NA	NA	NA
DDB0232428	6629	ATCTTCCCAATCTGGAGATC	23	GATCAGCAACTTGGTATCCG	22	not_unique	GATC	DDB_G0267182	+	DDB_G0267182_RTE	ORF2 protein fragment of DIRS1 retrotransposon%3B refer to Genbank M11339 for full-length element	NA	NA	NA	NA	NA	NA
DDB0232428	7086	AACTGATATTGTTAATGATC	22	GATCCATTCATCACAAGAAT	11	not_unique	GATC	DDB_G0267182	+	DDB_G0267182_RTE	ORF2 protein fragment of DIRS1 retrotransposon%3B refer to Genbank M11339 for full-length element	NA	NA	NA	NA	NA	NA
DDB0232428	7273	ATGTTTGGTTTAGCAAGATC	21	GATCATCAGACTTGGTAAAG	1	unique_one	GATC	DDB_G0267182	+	DDB_G0267182_RTE	ORF2 protein fragment of DIRS1 retrotransposon%3B refer to Genbank M11339 for full-length element	NA	NA	NA	NA	NA	NA
DDB0232428	8416	CGGATACCAAGTTGCTGATC	22	GATCTCCAGATTGGGAAGAT	23	not_unique	GATC	DDB_G0267184	-	DDB_G0267184_RTE	ORF2 protein fragment of DIRS1 retrotransposon%3B refer to Genbank M11339 for full-length element	NA	NA	NA	NA	NA	NA
DDB0232428	8433	ATCTCCAGATTGGGAAGATC	23	GATCAGTATTATGGAAACCT	1	unique_one	GATC	DDB_G0267184	-	DDB_G0267184_RTE	ORF2 protein fragment of DIRS1 retrotransposon%3B refer to Genbank M11339 for full-length element	NA	NA	NA	NA	NA	NA
DDB0232428	8612	AGGTGAGATGCGAACAGATC	19	GATCCATCTGTATTTGACCG	23	not_unique	GATC	DDB_G0267184	-	DDB_G0267184_RTE	ORF2 protein fragment of DIRS1 retrotransposon%3B refer to Genbank M11339 for full-length element	NA	NA	NA	NA	NA	NA
DDB0232428	8837	TCGAACAGAACTGAGAGATC	17	GATCTTGTATCTGACCACCC	6	not_unique	GATC	DDB_G0267184	-	DDB_G0267184_RTE	ORF2 protein fragment of DIRS1 retrotransposon%3B refer to Genbank M11339 for full-length element	NA	NA	NA	NA	NA	NA
DDB0232428	9498	TGCAACATTACTTGGTGATC	17	GATCCATTGAAGTTGTTAGA	22	not_unique	GATC	DDB_G0267184	-	DDB_G0267184_RTE	ORF2 protein fragment of DIRS1 retrotransposon%3B refer to Genbank M11339 for full-length element	NA	NA	NA	NA	NA	NA
DDB0232428	9516	TCCATTGAAGTTGTTAGATC	22	GATCGGCCATTACTCCCACT	21	not_unique	GATC	DDB_G0267184	-	DDB_G0267184_RTE	ORF2 protein fragment of DIRS1 retrotransposon%3B refer to Genbank M11339 for full-length element	NA	NA	NA	NA	NA	NA
DDB0232428	9728	TCTTTGGTGTATCCTTGATC	19	GATCTTAATTGGTAAGAGTA	20	not_unique	GATC	DDB_G0267186	-	DDB_G0267186_RTE	ORF1 protein fragment of DIRS1 retrotransposon%3B refer to Genbank M11339 for full-length element	NA	NA	NA	NA	NA	NA
DDB0232428	10064	AGCCAACGGAGATTGGGATC	3	GATCAATCATTCCCCATTCT	1	unique_one	GATC	DDB_G0267188	+	DDB_G0267188_RTE	ORF2 protein fragment of DIRS1 retrotransposon%3B refer to Genbank M11339 for full-length element	NA	NA	NA	NA	NA	NA
DDB0232428	10424	GGGTGGTCAAATACAAGATC	9	GATCTCTCAGTTCTGTTCGA	17	not_unique	GATC	DDB_G0267188	+	DDB_G0267188_RTE	ORF2 protein fragment of DIRS1 retrotransposon%3B refer to Genbank M11339 for full-length element	NA	NA	NA	NA	NA	NA
DDB0232428	10649	CGGTCAAATACAGATGGATC	23	GATCTGTTCGCATCTCACCT	19	not_unique	GATC	DDB_G0267188	+	DDB_G0267188_RTE	ORF2 protein fragment of DIRS1 retrotransposon%3B refer to Genbank M11339 for full-length element	NA	NA	NA	NA	NA	NA
DDB0232428	10828	AGGTTTCTATAATACTGATC	19	GATCTTCCCAATCTGGAGAT	23	not_unique	GATC	DDB_G0267188	+	DDB_G0267188_RTE	ORF2 protein fragment of DIRS1 retrotransposon%3B refer to Genbank M11339 for full-length element	NA	NA	NA	NA	NA	NA
DDB0232428	10845	ATCTTCCCAATCTGGAGATC	23	GATCAGCAACTTGGTATCCG	22	not_unique	GATC	DDB_G0267188	+	DDB_G0267188_RTE	ORF2 protein fragment of DIRS1 retrotransposon%3B refer to Genbank M11339 for full-length element	NA	NA	NA	NA	NA	NA
DDB0232428	10939	CATTTCAAGAAGTATTGATC	1	GATCAAACAATCAGTAGAGT	1	unique	GATC	DDB_G0267188	+	DDB_G0267188_RTE	ORF2 protein fragment of DIRS1 retrotransposon%3B refer to Genbank M11339 for full-length element	NA	NA	NA	NA	NA	NA
DDB0232428	11490	ATGTTTGGTTTAGCAAGATC	21	GATCATCAGACTTGGTGAAG	21	not_unique	GATC	DDB_G0267188	+	DDB_G0267188_RTE	ORF2 protein fragment of DIRS1 retrotransposon%3B refer to Genbank M11339 for full-length element	NA	NA	NA	NA	NA	NA
DDB0232428	12259	TTCGACCTTGCGCAATGATC	24	GATCGCGTCATTGTGCCGAT	1	unique_one	GATC	NA	NA	NA	NA	DDB_G0267188	DDB_G0267190	+	-	76	177
DDB0232428	12569	AAGGTAATATAATATTGATC	10	GATCTACTCTCTCTTCCTTT	1	unique_one	GATC	DDB_G0267190	-	DDB_G0267190_TE	ORF1 encoding a protein of unknown function of the putative DNA transposon DDT-A%3B refer to AF298201 for full-length consensus element	NA	NA	NA	NA	NA	NA
DDB0232428	14549	AAGATAGAGTTACCCCGATC	2	GATCAATCTTTTCACGAATA	1	unique_one	GATC	NA	NA	NA	NA	DDB_G0267190	DDB_G0267194	-	+	1505	2830
DDB0232428	14977	TATTCCGGGATAACTCGATC	10	GATCTTTTTCAAAATAACTT	19	not_unique	GATC	NA	NA	NA	NA	DDB_G0267190	DDB_G0267194	-	+	1933	2402
DDB0232428	15347	GGAGTCATGTTTTAGGGATC	2	GATCTTAGGATGATCTGTTT	2	not_unique	GATC	NA	NA	NA	NA	DDB_G0267190	DDB_G0267194	-	+	2303	2032
DDB0232428	15358	TTAGGGATCTTAGGATGATC	2	GATCTGTTTGTTATGTTGAA	2	not_unique	GATC	NA	NA	NA	NA	DDB_G0267190	DDB_G0267194	-	+	2314	2021
DDB0232428	15975	TCTAAAACTTTTAAAGGATC	1	GATCATCTTGAATCGCGATT	1	unique	GATC	NA	NA	NA	NA	DDB_G0267190	DDB_G0267194	-	+	2931	1404
DDB0232428	16017	AAATTGTAATTATTAAGATC	1	GATCATACCCAATTTTCTTT	2	unique_one	GATC	NA	NA	NA	NA	DDB_G0267190	DDB_G0267194	-	+	2973	1362
DDB0232428	16512	TTACCAAAAGGGATTCGATC	34	GATCCCCCGACCCTCTATCA	29	not_unique	GATC	NA	NA	NA	NA	DDB_G0267190	DDB_G0267194	-	+	3468	867
DDB0232428	16629	TTTTTTTCTAAAATTAGATC	3	GATCTTTTTTATTAAAAACC	36	not_unique	GATC	NA	NA	NA	NA	DDB_G0267190	DDB_G0267194	-	+	3585	750
DDB0232428	17050	GGTTTTTTATTGTTTTGATC	2	GATCATCATTATGTATTTCA	2	not_unique	GATC	NA	NA	NA	NA	DDB_G0267190	DDB_G0267194	-	+	4006	329
DDB0232428	17696	ATTTGAAGATACTGACGATC	2	GATCTCACTCAATCCCTCAA	2	not_unique	GATC	DDB_G0267194	+	DDB_G0267194	NA	NA	NA	NA	NA	NA	NA
DDB0232428	17827	AGAAAATGGCACAAAAGATC	2	GATCACTTAGAGCTGTACTC	1	unique_one	GATC	DDB_G0267194	+	DDB_G0267194	NA	NA	NA	NA	NA	NA	NA
DDB0232428	17990	ACGCACAAGCAAAACAGATC	2	GATCGACGTAACAAAGGGAA	1	unique_one	GATC	DDB_G0267196	+	DDB_G0267196	NA	NA	NA	NA	NA	NA	NA
DDB0232428	18019	AAGGGAATTCAAGAACGATC	1	GATCCCAGCAAATAAAACAG	2	unique_one	GATC	DDB_G0267196	+	DDB_G0267196	NA	NA	NA	NA	NA	NA	NA
DDB0232428	18261	AGAAAAAGCCAAACAAGATC	1	GATCAATTGGAGGCGACACA	1	unique	GATC	DDB_G0267196	+	DDB_G0267196	NA	NA	NA	NA	NA	NA	NA
DDB0232428	18345	AACAAGAAGCTTGATTGATC	2	GATCAACAGCGCACCCCCAG	2	not_unique	GATC	NA	NA	NA	NA	DDB_G0267196	DDB_G0267198	+	+	46	152
DDB0232428	18374	CCCCCAGCTGTTCATAGATC	2	GATCTCAAAGCGCCCGAAGT	2	not_unique	GATC	NA	NA	NA	NA	DDB_G0267196	DDB_G0267198	+	+	75	123
DDB0232428	18443	GTATCGAAGAAAAGACGATC	1	GATCCGAGGCAGCTAGCCCA	2	unique_one	GATC	NA	NA	NA	NA	DDB_G0267196	DDB_G0267198	+	+	144	54
DDB0232428	18502	ACCTCAAAGAGAGGATGATC	2	GATCGTGCTTCAAAATGCAC	1	unique_one	GATC	DDB_G0267198	+	DDB_G0267198	NA	NA	NA	NA	NA	NA	NA
DDB0232428	19125	CCAAGGGATACAACGTGATC	2	GATCTGCAAGAGGCGAAAAG	2	not_unique	GATC	NA	NA	NA	NA	DDB_G0267198	DDB_G0267202	+	+	431	1744
DDB0232428	19373	AAGCAGTGTTTTGCTAGATC	2	GATCAGATGGATCAGCAGAT	2	not_unique	GATC	NA	NA	NA	NA	DDB_G0267198	DDB_G0267202	+	+	679	1496
DDB0232428	19382	TTTGCTAGATCAGATGGATC	2	GATCAGCAGATAGCGCAAGT	2	not_unique	GATC	NA	NA	NA	NA	DDB_G0267198	DDB_G0267202	+	+	688	1487
DDB0232428	19545	GAGCAGCTATATCAAAGATC	2	GATCATTCGAGATACGCAAC	2	not_unique	GATC	NA	NA	NA	NA	DDB_G0267198	DDB_G0267202	+	+	851	1324
DDB0232428	19827	GCAAGCACTAGAGAAAGATC	1	GATCATACTAATGTAGATTT	1	unique	GATC	NA	NA	NA	NA	DDB_G0267198	DDB_G0267202	+	+	1133	1042
DDB0232428	20242	GGGGAAAATGATGGTTGATC	1	GATCATAATTATTATTTTAA	1	unique	GATC	NA	NA	NA	NA	DDB_G0267198	DDB_G0267202	+	+	1548	627
DDB0232428	20428	ACCGGCACAATGACGCGATC	38	GATCATTGCGCAAGGTCGAA	24	not_unique	GATC	NA	NA	NA	NA	DDB_G0267198	DDB_G0267202	+	+	1734	441
DDB0232428	20586	ATTACAGATTATGACAGATC	4	GATCTTGGGTAGAAAAGTTA	1	unique_one	GATC	NA	NA	NA	NA	DDB_G0267198	DDB_G0267202	+	+	1892	283
DDB0232428	20702	TTTCAAAAAATATAAGGATC	6	GATCAATTTACAATTTTTAT	1	unique_one	GATC	NA	NA	NA	NA	DDB_G0267198	DDB_G0267202	+	+	2008	167
DDB0232428	20836	CAATACAAACAACCAAGATC	6	GATCAACATAAATTTGTAAG	1	unique_one	GATC	NA	NA	NA	NA	DDB_G0267198	DDB_G0267202	+	+	2142	33
DDB0232428	21217	TGATAAAGATACAGGTGATC	4	GATCAAAATAATAAGCATTT	1	unique_one	GATC	DDB_G0267202	+	DDB_G0267202_TE	ORF1 encoding a protein of unknown function of the putative DNA transposon DDT-B%3B refer to AF298202 for full-length consensus element	NA	NA	NA	NA	NA	NA
DDB0232428	21554	GGTAATTATGTAAATAGATC	6	GATCATATATAACTTCACAA	1	unique_one	GATC	DDB_G0267204	+	DDB_G0267204_ps	putative pseudogene%3B similar to a family of genes%2C including %3Ca href%3D%22%2Fgene%2FDDB_G0267252%22%3EDDB_G0267252%3C%2Fa%3E	NA	NA	NA	NA	NA	NA
DDB0232428	21631	AACTGATAACTCCATAGATC	1	GATCCACAACGTACTGTCAC	1	unique	GATC	DDB_G0267204	+	DDB_G0267204_ps	putative pseudogene%3B similar to a family of genes%2C including %3Ca href%3D%22%2Fgene%2FDDB_G0267252%22%3EDDB_G0267252%3C%2Fa%3E	NA	NA	NA	NA	NA	NA
DDB0232428	21915	TTACCAAAAGGGATTCGATC	34	GATCCCCCGACCCTTTATTA	1	unique_one	GATC	DDB_G0267204	+	DDB_G0267204_ps	putative pseudogene%3B similar to a family of genes%2C including %3Ca href%3D%22%2Fgene%2FDDB_G0267252%22%3EDDB_G0267252%3C%2Fa%3E	NA	NA	NA	NA	NA	NA
DDB0232428	22019	TTATCCCCATTTTTTTGATC	8	GATCTAAAATTAGATGTTTT	5	not_unique	GATC	DDB_G0267204	+	DDB_G0267204_ps	putative pseudogene%3B similar to a family of genes%2C including %3Ca href%3D%22%2Fgene%2FDDB_G0267252%22%3EDDB_G0267252%3C%2Fa%3E	NA	NA	NA	NA	NA	NA
DDB0232428	22906	GGTTTTTAATAAAAAAGATC	36	GATCTAATTTTAGATAAAAA	1	unique_one	GATC	DDB_G0267204	+	DDB_G0267204_ps	putative pseudogene%3B similar to a family of genes%2C including %3Ca href%3D%22%2Fgene%2FDDB_G0267252%22%3EDDB_G0267252%3C%2Fa%3E	NA	NA	NA	NA	NA	NA
DDB0232428	23023	TGATAGAGGGTCGGGGGATC	29	GATCGAATCCCTTTTGGTAA	34	not_unique	GATC	DDB_G0267204	+	DDB_G0267204_ps	putative pseudogene%3B similar to a family of genes%2C including %3Ca href%3D%22%2Fgene%2FDDB_G0267252%22%3EDDB_G0267252%3C%2Fa%3E	NA	NA	NA	NA	NA	NA
DDB0232428	24341	ATGTTGTTACTTGGACGATC	1	GATCTATTAATCGTCGGTTC	22	unique_one	GATC	DDB_G0267206	+	DDB_G0267206_RTE	ORF2 protein fragment of DIRS1 retrotransposon%3B refer to Genbank M11339 for full-length element	NA	NA	NA	NA	NA	NA
DDB0232428	24714	AGCCAATGGAGATTGGGATC	16	GATCAATCATTCCCCATTCC	15	not_unique	GATC	DDB_G0267206	+	DDB_G0267206_RTE	ORF2 protein fragment of DIRS1 retrotransposon%3B refer to Genbank M11339 for full-length element	NA	NA	NA	NA	NA	NA
DDB0232428	24995	GGGTGGTCAGATACAAGATC	6	GATCTCTTAGTTCTGTTCGA	1	unique_one	GATC	DDB_G0267206	+	DDB_G0267206_RTE	ORF2 protein fragment of DIRS1 retrotransposon%3B refer to Genbank M11339 for full-length element	NA	NA	NA	NA	NA	NA
DDB0232428	25220	CGGTCAAATACAGATGGATC	23	GATCTGTTCGCATCTCACCT	19	not_unique	GATC	DDB_G0267206	+	DDB_G0267206_RTE	ORF2 protein fragment of DIRS1 retrotransposon%3B refer to Genbank M11339 for full-length element	NA	NA	NA	NA	NA	NA
DDB0232428	25399	AGGTTTCTACAATACTGATC	2	GATCTTCCCAATCTGGAGAT	23	not_unique	GATC	DDB_G0267206	+	DDB_G0267206_RTE	ORF2 protein fragment of DIRS1 retrotransposon%3B refer to Genbank M11339 for full-length element	NA	NA	NA	NA	NA	NA
DDB0232428	25416	ATCTTCCCAATCTGGAGATC	23	GATCAGCAACTTGGTATCTG	1	unique_one	GATC	DDB_G0267206	+	DDB_G0267206_RTE	ORF2 protein fragment of DIRS1 retrotransposon%3B refer to Genbank M11339 for full-length element	NA	NA	NA	NA	NA	NA
DDB0232428	25809	ACAATTAACGGTCATCGATC	4	GATCTATGTTGAATCAGTTG	5	not_unique	GATC	DDB_G0267206	+	DDB_G0267206_RTE	ORF2 protein fragment of DIRS1 retrotransposon%3B refer to Genbank M11339 for full-length element	NA	NA	NA	NA	NA	NA
DDB0232428	25862	AACTGATATTGTTAATGATC	22	GATCCATTCATTACAAGAAT	11	not_unique	GATC	DDB_G0267206	+	DDB_G0267206_RTE	ORF2 protein fragment of DIRS1 retrotransposon%3B refer to Genbank M11339 for full-length element	NA	NA	NA	NA	NA	NA
DDB0232428	27005	AAACCTACTGGTATGGGATC	2	GATCGCTCGGTTATCCTTCA	2	not_unique	GATC	NA	NA	NA	NA	DDB_G0267206	DDB_G0267208	+	+	589	1328
DDB0232428	27354	ACAGGAACGGTGAGTCGATC	1	GATCTATTTGTTGAAAACTT	1	unique	GATC	NA	NA	NA	NA	DDB_G0267206	DDB_G0267208	+	+	938	979
DDB0232428	27502	GTAGGTCGATGAGAAAGATC	1	GATCTTATTGTCCCAATACA	1	unique	GATC	NA	NA	NA	NA	DDB_G0267206	DDB_G0267208	+	+	1086	831
DDB0232428	27631	CTTGTCAAGGGGTAATGATC	1	GATCAGACAACAAGTCAAAT	1	unique	GATC	NA	NA	NA	NA	DDB_G0267206	DDB_G0267208	+	+	1215	702
DDB0232428	27770	TAATAAAGGGGATGCCGATC	2	GATCAATAAAGTAACCCAGC	2	not_unique	GATC	NA	NA	NA	NA	DDB_G0267206	DDB_G0267208	+	+	1354	563
DDB0232428	27811	AGTTTAAACACTTCTAGATC	2	GATCTCCTAGGCTAATCGCT	2	not_unique	GATC	NA	NA	NA	NA	DDB_G0267206	DDB_G0267208	+	+	1395	522
DDB0232428	28432	AATGAAATCAATGGAGGATC	24	GATCAAATCAACAACCTTTC	31	not_unique	GATC	DDB_G0267208	+	DDB_G0267208_RTE	ORF1 protein fragment of DIRS1 retrotransposon%3B refer to Genbank M11339 for full-length element	NA	NA	NA	NA	NA	NA
DDB0232428	29012	TACTCTTACCAATTAAGATC	20	GATCAAGGATACACCAAAGA	19	not_unique	GATC	NA	NA	NA	NA	DDB_G0267208	DDB_G0267210	+	+	92	125
DDB0232428	29224	AGTGGGAGTAATGGCCGATC	21	GATCTAACAACTTCAATGGA	22	not_unique	GATC	DDB_G0267210	+	DDB_G0267210_RTE	ORF2 protein fragment of DIRS1 retrotransposon%3B refer to Genbank M11339 for full-length element	NA	NA	NA	NA	NA	NA
DDB0232428	29242	TCTAACAACTTCAATGGATC	22	GATCACCAAGTAATGTTGCA	17	not_unique	GATC	DDB_G0267210	+	DDB_G0267210_RTE	ORF2 protein fragment of DIRS1 retrotransposon%3B refer to Genbank M11339 for full-length element	NA	NA	NA	NA	NA	NA
DDB0232428	29777	CCTCCACGTTTTAGTAGATC	8	GATCCACAATACAGAGACTT	11	not_unique	GATC	DDB_G0267210	+	DDB_G0267210_RTE	ORF2 protein fragment of DIRS1 retrotransposon%3B refer to Genbank M11339 for full-length element	NA	NA	NA	NA	NA	NA
DDB0232428	29945	CATCGCTTACTTGGACGATC	17	GATCTATTAATCGTCGGTTC	22	not_unique	GATC	DDB_G0267210	+	DDB_G0267210_RTE	ORF2 protein fragment of DIRS1 retrotransposon%3B refer to Genbank M11339 for full-length element	NA	NA	NA	NA	NA	NA
DDB0232428	30317	AGCCAACGGAGATTGGGATC	3	GATCAATCATTCCCCATTCC	15	not_unique	GATC	DDB_G0267210	+	DDB_G0267210_RTE	ORF2 protein fragment of DIRS1 retrotransposon%3B refer to Genbank M11339 for full-length element	NA	NA	NA	NA	NA	NA
DDB0232428	30677	GGGTGGTCAAATACAAGATC	9	GATCTCTCAGTTCTGTTCGA	17	not_unique	GATC	DDB_G0267210	+	DDB_G0267210_RTE	ORF2 protein fragment of DIRS1 retrotransposon%3B refer to Genbank M11339 for full-length element	NA	NA	NA	NA	NA	NA
DDB0232428	30902	CGGTCAAATACAGATGGATC	23	GATCTGTTCGCATCTCACCT	19	not_unique	GATC	DDB_G0267210	+	DDB_G0267210_RTE	ORF2 protein fragment of DIRS1 retrotransposon%3B refer to Genbank M11339 for full-length element	NA	NA	NA	NA	NA	NA
DDB0232428	31081	AGGTTTCTACAATACTGATC	2	GATCTTCCCAATCTGGAGAT	23	not_unique	GATC	DDB_G0267210	+	DDB_G0267210_RTE	ORF2 protein fragment of DIRS1 retrotransposon%3B refer to Genbank M11339 for full-length element	NA	NA	NA	NA	NA	NA
DDB0232428	31098	ATCTTCCCAATCTGGAGATC	23	GATCAGCAACTTGGTATCCG	22	not_unique	GATC	DDB_G0267210	+	DDB_G0267210_RTE	ORF2 protein fragment of DIRS1 retrotransposon%3B refer to Genbank M11339 for full-length element	NA	NA	NA	NA	NA	NA
DDB0232428	31555	AACTGATATTGTTAATGATC	22	GATCCATTCATTACAAGAAT	11	not_unique	GATC	DDB_G0267210	+	DDB_G0267210_RTE	ORF2 protein fragment of DIRS1 retrotransposon%3B refer to Genbank M11339 for full-length element	NA	NA	NA	NA	NA	NA
DDB0232428	31742	ATGTTTGGTTTAGCAAGATC	21	GATCATCAGACTTGGTGAAG	21	not_unique	GATC	DDB_G0267210	+	DDB_G0267210_RTE	ORF2 protein fragment of DIRS1 retrotransposon%3B refer to Genbank M11339 for full-length element	NA	NA	NA	NA	NA	NA
DDB0232428	32511	TTCGACCTTGCGCAATGATC	24	GATCGCGTCATTGTGCCGGT	38	not_unique	GATC	NA	NA	NA	NA	DDB_G0267210	DDB_G0267216	+	-	273	3659
DDB0232428	33008	TACTCTTACCAATTAAGATC	20	GATCAAGGATACACCAAAGA	19	not_unique	GATC	NA	NA	NA	NA	DDB_G0267210	DDB_G0267216	+	-	770	3162
DDB0232428	33220	AGTGGGAGTAATGGCCGATC	21	GATCTAACAACTTCAATGGA	22	not_unique	GATC	NA	NA	NA	NA	DDB_G0267210	DDB_G0267216	+	-	982	2950
DDB0232428	33238	TCTAACAACTTCAATGGATC	22	GATCACCAAGTAATGTTGCA	17	not_unique	GATC	NA	NA	NA	NA	DDB_G0267210	DDB_G0267216	+	-	1000	2932
DDB0232428	33773	CCTCCACGTATTAGTAGATC	4	GATCCACAATACAGAGACTT	11	not_unique	GATC	NA	NA	NA	NA	DDB_G0267210	DDB_G0267216	+	-	1535	2397
DDB0232428	34063	CATCGCATACTTGGACGATC	4	GATCTATTAATCGTCGGTTC	22	not_unique	GATC	NA	NA	NA	NA	DDB_G0267210	DDB_G0267216	+	-	1825	2107
DDB0232428	34209	CGTTTCTCGGGTTACAGATC	1	GATCGATTCGGTATCAATGA	1	unique	GATC	NA	NA	NA	NA	DDB_G0267210	DDB_G0267216	+	-	1971	1961
DDB0232428	34521	AACTGATATTGTTAATGATC	22	GATCCATTCATCTCAAGAAT	1	unique_one	GATC	NA	NA	NA	NA	DDB_G0267210	DDB_G0267216	+	-	2283	1649
DDB0232428	34708	ATGTTTGGTTTAGCAAGATC	21	GATCACCAGACTTGTTTAAG	1	unique_one	GATC	NA	NA	NA	NA	DDB_G0267210	DDB_G0267216	+	-	2470	1462
DDB0232428	35083	ACCGGCACAATGACGCGATC	38	GATCATTGAGCAAGGTCGAA	3	not_unique	GATC	NA	NA	NA	NA	DDB_G0267210	DDB_G0267216	+	-	2845	1087
DDB0232428	35154	AATGAAATCAATGGAAGATC	6	GATCAAATCAACAACCTTTC	31	not_unique	GATC	NA	NA	NA	NA	DDB_G0267210	DDB_G0267216	+	-	2916	1016
DDB0232428	36206	TTCTTTGACCTGATGGGATC	2	GATCGTAAATATATTTTTGA	2	not_unique	GATC	DDB_G0267216	-	DDB_G0267216	NA	NA	NA	NA	NA	NA	NA
DDB0232428	36483	AGTTATTTGTTGTTCCGATC	2	GATCCATCCACCACCATTGT	1	unique_one	GATC	DDB_G0267216	-	DDB_G0267216	NA	NA	NA	NA	NA	NA	NA
DDB0232428	36958	ATCATTTTTTGATTTTGATC	1	GATCTTGTTTTAATTGGTTC	1	unique	GATC	DDB_G0267218	-	DDB_G0267218	NA	NA	NA	NA	NA	NA	NA
DDB0232428	38064	TCATTATACTCAACTTGATC	1	GATCAACAGTACAGGCATCC	1	unique	GATC	DDB_G0267222	-	DDB_G0267222	NA	NA	NA	NA	NA	NA	NA
DDB0232428	38339	TGACATCTTCAATCTTGATC	1	GATCCATTCGATACCATTCT	1	unique	GATC	DDB_G0267222	-	DDB_G0267222	NA	NA	NA	NA	NA	NA	NA
DDB0232428	38453	TTAAAATTTCCTTAACGATC	1	GATCTTCATTTCATCAAGAA	2	unique_one	GATC	DDB_G0267222	-	DDB_G0267222	NA	NA	NA	NA	NA	NA	NA
DDB0232428	38554	AAGTCCATTTTACTTCGATC	1	GATCGAAGTTATGTGATAAA	1	unique	GATC	NA	NA	NA	NA	DDB_G0267222	DDB_G0267224	-	-	12	160
DDB0232428	38591	ATTATTATTATAATGTGATC	1	GATCTGAAAGACCATCAGCG	1	unique	GATC	NA	NA	NA	NA	DDB_G0267222	DDB_G0267224	-	-	49	123
DDB0232428	38887	ACAGCTGATTTAACTTGATC	1	GATCAAAAGCCAATTGCACC	1	unique	GATC	DDB_G0267224	-	DDB_G0267224	NA	NA	NA	NA	NA	NA	NA
DDB0232428	38956	GTGAGACGATAGAGTGGATC	1	GATCAGCTATAATGGCTAAA	1	unique	GATC	DDB_G0267224	-	DDB_G0267224	NA	NA	NA	NA	NA	NA	NA
DDB0232428	39149	AAATCTTGTTTATGTTGATC	1	GATCATAATAAAAAGATTTT	1	unique	GATC	NA	NA	NA	NA	DDB_G0267224	DDB_G0267226	-	-	139	85
DDB0232428	39338	AATGCTGTCTTTGACCGATC	1	GATCTCTAGGTTCTACTTGG	1	unique	GATC	DDB_G0267226	-	DDB_G0267226	NA	NA	NA	NA	NA	NA	NA
DDB0232428	39357	CTCTAGGTTCTACTTGGATC	1	GATCTGGTGGAAACCATCGG	1	unique	GATC	DDB_G0267226	-	DDB_G0267226	NA	NA	NA	NA	NA	NA	NA
DDB0232428	39384	AACCATCGGCTAAATCGATC	1	GATCCTGGACATTAACTTTG	1	unique	GATC	DDB_G0267226	-	DDB_G0267226	NA	NA	NA	NA	NA	NA	NA
DDB0232428	39596	AACCTTTCAGTAAGTTGATC	1	GATCTTTCAATTCTTGTTAT	1	unique	GATC	NA	NA	NA	NA	DDB_G0267226	DDB_G0267228	-	+	102	294
DDB0232428	39770	TGTTTGATGATGAATTGATC	1	GATCTTGAACTTCTTTCCAT	1	unique	GATC	NA	NA	NA	NA	DDB_G0267226	DDB_G0267228	-	+	276	120
DDB0232428	39887	TGATTGAAGACCTCTTGATC	1	GATCATATGAGCCAACAAAA	1	unique	GATC	NA	NA	NA	NA	DDB_G0267226	DDB_G0267228	-	+	393	3
DDB0232428	40494	ATGAGTCATCAAGGTAGATC	7	GATCAGATTATACTATAATG	5	not_unique	GATC	DDB_G0267228	+	DDB_G0267228_TE	ORF1 encoding a protein of unknown function of the putative DNA transposon DDT-B%3B refer to AF298202 for full-length consensus element	NA	NA	NA	NA	NA	NA
DDB0232428	40722	GATATACCAGAATTTAGATC	5	GATCATCTTGTAGGATTAAC	7	not_unique	GATC	DDB_G0267228	+	DDB_G0267228_TE	ORF1 encoding a protein of unknown function of the putative DNA transposon DDT-B%3B refer to AF298202 for full-length consensus element	NA	NA	NA	NA	NA	NA
DDB0232428	40956	ATTACAGATTATGACAGATC	4	GATCTTGGGTAGAAAATTTA	5	not_unique	GATC	DDB_G0267228	+	DDB_G0267228_TE	ORF1 encoding a protein of unknown function of the putative DNA transposon DDT-B%3B refer to AF298202 for full-length consensus element	NA	NA	NA	NA	NA	NA
DDB0232428	41072	TTTCAAAAAATATAAGGATC	6	GATCAAATTACAATTTTTAT	5	not_unique	GATC	DDB_G0267228	+	DDB_G0267228_TE	ORF1 encoding a protein of unknown function of the putative DNA transposon DDT-B%3B refer to AF298202 for full-length consensus element	NA	NA	NA	NA	NA	NA
DDB0232428	41123	AGCTAAAATCATTCCAGATC	5	GATCATTTACCACCATCAGA	5	not_unique	GATC	DDB_G0267228	+	DDB_G0267228_TE	ORF1 encoding a protein of unknown function of the putative DNA transposon DDT-B%3B refer to AF298202 for full-length consensus element	NA	NA	NA	NA	NA	NA
DDB0232428	41513	CAATACAAACAACCAAGATC	6	GATCAACATAAATTTGAAAG	5	not_unique	GATC	DDB_G0267228	+	DDB_G0267228_TE	ORF1 encoding a protein of unknown function of the putative DNA transposon DDT-B%3B refer to AF298202 for full-length consensus element	NA	NA	NA	NA	NA	NA
DDB0232428	41894	TGATAAAGATATAGGTGATC	1	GATCAAAATAATAAGTACCA	4	unique_one	GATC	DDB_G0267228	+	DDB_G0267228_TE	ORF1 encoding a protein of unknown function of the putative DNA transposon DDT-B%3B refer to AF298202 for full-length consensus element	NA	NA	NA	NA	NA	NA
DDB0232428	42257	GGTAATTATGTAAATAGATC	6	GATCATCTTTAACTTCACCA	5	not_unique	GATC	DDB_G0267230	+	DDB_G0267230	NA	NA	NA	NA	NA	NA	NA
DDB0232428	42976	AGAAGCTTTTGACTCCGATC	4	GATCCTTTTGTAAAGTTCTT	4	not_unique	GATC	DDB_G0267230	+	DDB_G0267230	NA	NA	NA	NA	NA	NA	NA
DDB0232428	44500	GGTTTTTAATAAAAAAGATC	36	GATCTAATTTTAGATCAAAA	3	not_unique	GATC	NA	NA	NA	NA	DDB_G0267230	DDB_G0267236	+	-	1321	1605
DDB0232428	44512	AAAAGATCTAATTTTAGATC	3	GATCAAAATGGGGATAAAAT	1	unique_one	GATC	NA	NA	NA	NA	DDB_G0267230	DDB_G0267236	+	-	1333	1593
DDB0232428	44960	AGATATCATCATTTGCGATC	1	GATCAACTTAAATAAATAGT	2	unique_one	GATC	NA	NA	NA	NA	DDB_G0267230	DDB_G0267236	+	-	1781	1145
DDB0232428	45010	GTAGTGGGCATTTCTGGATC	2	GATCGATAAGGTAAGCGTGA	2	not_unique	GATC	NA	NA	NA	NA	DDB_G0267230	DDB_G0267236	+	-	1831	1095
DDB0232428	45031	ATAAGGTAAGCGTGACGATC	1	GATCATTTTAAATGGTTTCG	1	unique	GATC	NA	NA	NA	NA	DDB_G0267230	DDB_G0267236	+	-	1852	1074
DDB0232428	45145	CAGTTAGCGTACCATTGATC	1	GATCTAATTTTTGATTTGGT	1	unique	GATC	NA	NA	NA	NA	DDB_G0267230	DDB_G0267236	+	-	1966	960
DDB0232428	45383	TGCCGGCATTAGATTCGATC	1	GATCACCTCATTGCTGGTTT	1	unique	GATC	NA	NA	NA	NA	DDB_G0267230	DDB_G0267236	+	-	2204	722
DDB0232428	45836	ACCGGCACAATGACGCGATC	38	GATCATTGTGTAAGGTCGAA	10	not_unique	GATC	NA	NA	NA	NA	DDB_G0267230	DDB_G0267236	+	-	2657	269
DDB0232428	46604	CTTCACCAAGTCTGATGATC	21	GATCTTGCTAAACCAAACAT	21	not_unique	GATC	DDB_G0267236	-	DDB_G0267236_RTE	ORF2 protein fragment of DIRS1 retrotransposon%3B refer to Genbank M11339 for full-length element	NA	NA	NA	NA	NA	NA
DDB0232428	46791	ATTCTTGTGATGAATGGATC	11	GATCATTAACAATATCAGTT	22	not_unique	GATC	DDB_G0267236	-	DDB_G0267236_RTE	ORF2 protein fragment of DIRS1 retrotransposon%3B refer to Genbank M11339 for full-length element	NA	NA	NA	NA	NA	NA
DDB0232428	47248	CGGATACCAAGTTGCTGATC	22	GATCTCCAGATTGGGAAGAT	23	not_unique	GATC	DDB_G0267236	-	DDB_G0267236_RTE	ORF2 protein fragment of DIRS1 retrotransposon%3B refer to Genbank M11339 for full-length element	NA	NA	NA	NA	NA	NA
DDB0232428	47265	ATCTCCAGATTGGGAAGATC	23	GATCAGTATTATAGAAACCT	19	not_unique	GATC	DDB_G0267236	-	DDB_G0267236_RTE	ORF2 protein fragment of DIRS1 retrotransposon%3B refer to Genbank M11339 for full-length element	NA	NA	NA	NA	NA	NA
DDB0232428	47444	AGGTGAGATGCGAACAGATC	19	GATCCATCTGTATTTGACCG	23	not_unique	GATC	DDB_G0267236	-	DDB_G0267236_RTE	ORF2 protein fragment of DIRS1 retrotransposon%3B refer to Genbank M11339 for full-length element	NA	NA	NA	NA	NA	NA
DDB0232428	47669	TCGAACAGAACTGAGAGATC	17	GATCTTGTATTTGACCACCC	9	not_unique	GATC	DDB_G0267236	-	DDB_G0267236_RTE	ORF2 protein fragment of DIRS1 retrotransposon%3B refer to Genbank M11339 for full-length element	NA	NA	NA	NA	NA	NA
DDB0232428	48029	GGAATGGGGAATGATTGATC	15	GATCCCAATCTCCTTTGGCT	1	unique_one	GATC	DDB_G0267236	-	DDB_G0267236_RTE	ORF2 protein fragment of DIRS1 retrotransposon%3B refer to Genbank M11339 for full-length element	NA	NA	NA	NA	NA	NA
DDB0232428	48401	GAACCGACGATTAATAGATC	22	GATCGTCCAAGTAAGCGATG	17	not_unique	GATC	NA	NA	NA	NA	DDB_G0267236	DDB_G0267238	-	-	32	618
DDB0232428	48569	AAGTCTCTGTATTGTGGATC	11	GATCTACTAACACGTGGAGG	3	not_unique	GATC	NA	NA	NA	NA	DDB_G0267236	DDB_G0267238	-	-	200	450
DDB0232428	48707	GTGTTTAACCTTTTTAGATC	6	GATCGAGAACTGGACGATGT	6	not_unique	GATC	NA	NA	NA	NA	DDB_G0267236	DDB_G0267238	-	-	338	312
DDB0232428	49104	TGCAACACTACTTGGTGATC	5	GATCCATTGAAGTTGTTAGA	22	not_unique	GATC	DDB_G0267238	-	DDB_G0267238_RTE	ORF1 protein of DIRS1 retrotransposon%3B refer to Genbank M11339 for full-length element	NA	NA	NA	NA	NA	NA
DDB0232428	49122	TCCATTGAAGTTGTTAGATC	22	GATCGGCCATTACTCCCACT	21	not_unique	GATC	DDB_G0267238	-	DDB_G0267238_RTE	ORF1 protein of DIRS1 retrotransposon%3B refer to Genbank M11339 for full-length element	NA	NA	NA	NA	NA	NA
DDB0232428	49334	TCTTTGGTGTATCCTTGATC	19	GATCTTAATTGGTAAGAGTA	20	not_unique	GATC	DDB_G0267238	-	DDB_G0267238_RTE	ORF1 protein of DIRS1 retrotransposon%3B refer to Genbank M11339 for full-length element	NA	NA	NA	NA	NA	NA
DDB0232428	49930	GAAAGGTTGTTGATTTGATC	31	GATCCTCCATTGATTTCATT	24	not_unique	GATC	DDB_G0267238	-	DDB_G0267238_RTE	ORF1 protein of DIRS1 retrotransposon%3B refer to Genbank M11339 for full-length element	NA	NA	NA	NA	NA	NA
DDB0232428	50320	TTCGACCTTACACAATGATC	10	GATCGCGTCATTGTGCCGGT	38	not_unique	GATC	NA	NA	NA	NA	DDB_G0267238	DDB_G0267240	-	-	294	2105
DDB0232428	51054	CACATTCTGTAATTTAGATC	1	GATCATGATCGGTGTTATTT	1	unique	GATC	NA	NA	NA	NA	DDB_G0267238	DDB_G0267240	-	-	1028	1371
DDB0232428	51060	CTGTAATTTAGATCATGATC	1	GATCGGTGTTATTTATTTAA	1	unique	GATC	NA	NA	NA	NA	DDB_G0267238	DDB_G0267240	-	-	1034	1365
DDB0232428	51355	GCTTGATTACTTTGCTGATC	3	GATCTCCAGCGGATACAGCA	2	not_unique	GATC	NA	NA	NA	NA	DDB_G0267238	DDB_G0267240	-	-	1329	1070
DDB0232428	51846	AAAACATCTAATTTTAGATC	5	GATCAAAAAAATGGGGATAA	8	not_unique	GATC	NA	NA	NA	NA	DDB_G0267238	DDB_G0267240	-	-	1820	579
DDB0232428	52156	ACCGGCACAATGACGCGATC	38	GATCATTGCGACAGGTCGAA	1	unique_one	GATC	NA	NA	NA	NA	DDB_G0267238	DDB_G0267240	-	-	2130	269
DDB0232428	52924	CTTCACCAAGTCTGATGATC	21	GATCTTGCTAAACCAAACAT	21	not_unique	GATC	DDB_G0267240	-	DDB_G0267240_RTE	ORF2 protein fragment of DIRS1 retrotransposon%3B refer to Genbank M11339 for full-length element	NA	NA	NA	NA	NA	NA
DDB0232428	53111	ATTCTTGTAATGAATGGATC	11	GATCATTAACAATATCAGTT	22	not_unique	GATC	DDB_G0267240	-	DDB_G0267240_RTE	ORF2 protein fragment of DIRS1 retrotransposon%3B refer to Genbank M11339 for full-length element	NA	NA	NA	NA	NA	NA
DDB0232428	53164	TAACTGATTCAACATAGATC	1	GATCGATGACCGTTAATTGT	4	unique_one	GATC	DDB_G0267240	-	DDB_G0267240_RTE	ORF2 protein fragment of DIRS1 retrotransposon%3B refer to Genbank M11339 for full-length element	NA	NA	NA	NA	NA	NA
DDB0232428	53568	CGGATACCAAGTTGCTGATC	22	GATCTCCAGATTGGGAAGAT	23	not_unique	GATC	DDB_G0267240	-	DDB_G0267240_RTE	ORF2 protein fragment of DIRS1 retrotransposon%3B refer to Genbank M11339 for full-length element	NA	NA	NA	NA	NA	NA
DDB0232428	53585	ATCTCCAGATTGGGAAGATC	23	GATCAGTATTATAGAAACCT	19	not_unique	GATC	DDB_G0267240	-	DDB_G0267240_RTE	ORF2 protein fragment of DIRS1 retrotransposon%3B refer to Genbank M11339 for full-length element	NA	NA	NA	NA	NA	NA
DDB0232428	53764	AGGTGAGATGCGAACAGATC	19	GATCCATCTGTATTTGACCG	23	not_unique	GATC	DDB_G0267240	-	DDB_G0267240_RTE	ORF2 protein fragment of DIRS1 retrotransposon%3B refer to Genbank M11339 for full-length element	NA	NA	NA	NA	NA	NA
DDB0232428	53989	TCGAACAGAACTGAGAGATC	17	GATCTTGTATCTGACCACCC	6	not_unique	GATC	DDB_G0267240	-	DDB_G0267240_RTE	ORF2 protein fragment of DIRS1 retrotransposon%3B refer to Genbank M11339 for full-length element	NA	NA	NA	NA	NA	NA
DDB0232428	54349	GGAATGGGGAATGATTGATC	15	GATCCCAATCTCCATTGGCT	16	not_unique	GATC	DDB_G0267240	-	DDB_G0267240_RTE	ORF2 protein fragment of DIRS1 retrotransposon%3B refer to Genbank M11339 for full-length element	NA	NA	NA	NA	NA	NA
DDB0232428	54721	GAACCGACGATTAATAGATC	22	GATCGTCCAAGTAAGCGATG	17	not_unique	GATC	DDB_G0267240	-	DDB_G0267240_RTE	ORF2 protein fragment of DIRS1 retrotransposon%3B refer to Genbank M11339 for full-length element	NA	NA	NA	NA	NA	NA
DDB0232428	54889	AAGTCTCTGTATTGCGGATC	9	GATCTACTAATACGTGGAGG	4	not_unique	GATC	DDB_G0267240	-	DDB_G0267240_RTE	ORF2 protein fragment of DIRS1 retrotransposon%3B refer to Genbank M11339 for full-length element	NA	NA	NA	NA	NA	NA
DDB0232428	55027	GTGTTTAACCTTTTTAGATC	6	GATCGAGAACTGGACGATGT	6	not_unique	GATC	NA	NA	NA	NA	DDB_G0267240	DDB_G0267242	-	-	45	306
DDB0232428	55418	TGCAACACTACTTGGTGATC	5	GATCCATTGAAGTTGTTAGA	22	not_unique	GATC	DDB_G0267242	-	DDB_G0267242_RTE	ORF1 protein fragment of DIRS1 retrotransposon%3B refer to Genbank M11339 for full-length element	NA	NA	NA	NA	NA	NA
DDB0232428	55436	TCCATTGAAGTTGTTAGATC	22	GATCGGCCATTACTCCCACT	21	not_unique	GATC	DDB_G0267242	-	DDB_G0267242_RTE	ORF1 protein fragment of DIRS1 retrotransposon%3B refer to Genbank M11339 for full-length element	NA	NA	NA	NA	NA	NA
DDB0232428	55648	TCTTTGGTGTATCCTTGATC	19	GATCTTAATTGGTAAGAGTA	20	not_unique	GATC	DDB_G0267242	-	DDB_G0267242_RTE	ORF1 protein fragment of DIRS1 retrotransposon%3B refer to Genbank M11339 for full-length element	NA	NA	NA	NA	NA	NA
DDB0232428	56715	GAAAGGTTGTTGATTTGATC	31	GATCCTCCATTGATTTCATT	24	not_unique	GATC	DDB_G0267264	-	DDB_G0267264_RTE	ORF1 protein fragment of DIRS1 retrotransposon%3B refer to Genbank M11339 for full-length element	NA	NA	NA	NA	NA	NA
DDB0232428	57104	TTCGACCTTGCGCAATGATC	24	GATCGCGTCATTTTGCCGGT	1	unique_one	GATC	NA	NA	NA	NA	DDB_G0267264	DDB_G0267244	-	-	293	138
DDB0232428	57648	CTTCACCAAGTCTGATGATC	21	GATCTTGCTAAACCAAACAT	21	not_unique	GATC	DDB_G0267244	-	DDB_G0267244_RTE	ORF2 protein fragment of DIRS1 retrotransposon%3B refer to Genbank M11339 for full-length element	NA	NA	NA	NA	NA	NA
DDB0232428	57835	ATTCTTGTGATGAATGGATC	11	GATCATTAACAATATCAGTT	22	not_unique	GATC	DDB_G0267244	-	DDB_G0267244_RTE	ORF2 protein fragment of DIRS1 retrotransposon%3B refer to Genbank M11339 for full-length element	NA	NA	NA	NA	NA	NA
DDB0232428	58292	CGGATACCAAGTTGCTGATC	22	GATCTCCAGATTGGGAAGAT	23	not_unique	GATC	DDB_G0267244	-	DDB_G0267244_RTE	ORF2 protein fragment of DIRS1 retrotransposon%3B refer to Genbank M11339 for full-length element	NA	NA	NA	NA	NA	NA
DDB0232428	58309	ATCTCCAGATTGGGAAGATC	23	GATCAGTATTATAGAAACCT	19	not_unique	GATC	DDB_G0267244	-	DDB_G0267244_RTE	ORF2 protein fragment of DIRS1 retrotransposon%3B refer to Genbank M11339 for full-length element	NA	NA	NA	NA	NA	NA
DDB0232428	58488	AGGTGAGATGCGAACAGATC	19	GATCCATCTGTATTTGACCG	23	not_unique	GATC	DDB_G0267244	-	DDB_G0267244_RTE	ORF2 protein fragment of DIRS1 retrotransposon%3B refer to Genbank M11339 for full-length element	NA	NA	NA	NA	NA	NA
DDB0232428	58713	TCGAATAGAACTGAGAGATC	4	GATCTTGTATTTGACCACCT	2	not_unique	GATC	DDB_G0267244	-	DDB_G0267244_RTE	ORF2 protein fragment of DIRS1 retrotransposon%3B refer to Genbank M11339 for full-length element	NA	NA	NA	NA	NA	NA
DDB0232428	59073	GGAATGGGGAATGATTGATC	15	GATCCCAATCTCCATTGGCT	16	not_unique	GATC	DDB_G0267244	-	DDB_G0267244_RTE	ORF2 protein fragment of DIRS1 retrotransposon%3B refer to Genbank M11339 for full-length element	NA	NA	NA	NA	NA	NA
DDB0232428	59445	GAACCGACGATTAATAGATC	22	GATCGTCCAAGTATGCGATG	4	not_unique	GATC	NA	NA	NA	NA	DDB_G0267244	DDB_G0267246	-	-	32	618
DDB0232428	59613	AAGTCTCTGTATTGTGGATC	11	GATCTACTAACACGTGTAGG	4	not_unique	GATC	NA	NA	NA	NA	DDB_G0267244	DDB_G0267246	-	-	200	450
DDB0232428	59698	TTGATGGTAGATTCTTGATC	1	GATCCCTTCCATCTTGAATG	1	unique	GATC	NA	NA	NA	NA	DDB_G0267244	DDB_G0267246	-	-	285	365
DDB0232428	59986	TTTTTAATCCATTTACGATC	1	GATCTCTTGACAAAAGTTTG	1	unique	GATC	NA	NA	NA	NA	DDB_G0267244	DDB_G0267246	-	-	573	77
DDB0232428	60148	TGCAACACTACTTGGTGATC	5	GATCCATTGAAGTTGTTAGA	22	not_unique	GATC	DDB_G0267246	-	DDB_G0267246_RTE	ORF1 protein of DIRS1 retrotransposon%3B refer to Genbank M11339 for full-length element	NA	NA	NA	NA	NA	NA
DDB0232428	60166	TCCATTGAAGTTGTTAGATC	22	GATCGGCCATTACTCCCACT	21	not_unique	GATC	DDB_G0267246	-	DDB_G0267246_RTE	ORF1 protein of DIRS1 retrotransposon%3B refer to Genbank M11339 for full-length element	NA	NA	NA	NA	NA	NA
DDB0232428	60378	TCTTTGGTGTATCCTTGATC	19	GATCTTAATTGGTAAGAGTA	20	not_unique	GATC	DDB_G0267246	-	DDB_G0267246_RTE	ORF1 protein of DIRS1 retrotransposon%3B refer to Genbank M11339 for full-length element	NA	NA	NA	NA	NA	NA
DDB0232428	60974	GAAAGGTTGTTGATTTGATC	31	GATCCTCCATTGATTTCATT	24	not_unique	GATC	DDB_G0267246	-	DDB_G0267246_RTE	ORF1 protein of DIRS1 retrotransposon%3B refer to Genbank M11339 for full-length element	NA	NA	NA	NA	NA	NA
DDB0232428	62055	CTTCACCAAGTCTGATGATC	21	GATCTTGCTAAACCAAACAT	21	not_unique	GATC	DDB_G0267248	-	DDB_G0267248_RTE	ORF2 protein fragment of DIRS1 retrotransposon%3B refer to Genbank M11339 for full-length element	NA	NA	NA	NA	NA	NA
DDB0232428	62242	ATTCTTGTAATGAATGGATC	11	GATCATTAACAATATCACAC	1	unique_one	GATC	NA	NA	NA	NA	DDB_G0267248	DDB_G0267250	-	+	21	1349
DDB0232428	63681	TTTTATTAAACATAATGATC	2	GATCGTTGCCCAATTTGTTT	2	not_unique	GATC	DDB_G0267250	+	DDB_G0267250_TE	ORF1 encoding a protein of unknown function of the putative DNA transposon DDT-B%3B refer to AF298202 for full-length consensus element	NA	NA	NA	NA	NA	NA
DDB0232428	64486	ATGAGTCATCAAGGTAGATC	7	GATCAGATTATACTATAATG	5	not_unique	GATC	DDB_G0267250	+	DDB_G0267250_TE	ORF1 encoding a protein of unknown function of the putative DNA transposon DDT-B%3B refer to AF298202 for full-length consensus element	NA	NA	NA	NA	NA	NA
DDB0232428	64714	GATATACCAGAATTTAGATC	5	GATCATCTTGTAGGATTAAC	7	not_unique	GATC	DDB_G0267250	+	DDB_G0267250_TE	ORF1 encoding a protein of unknown function of the putative DNA transposon DDT-B%3B refer to AF298202 for full-length consensus element	NA	NA	NA	NA	NA	NA
DDB0232428	64948	ATTACAGATTATGACAGATC	4	GATCTTGGGTAGAAAATTTA	5	not_unique	GATC	DDB_G0267250	+	DDB_G0267250_TE	ORF1 encoding a protein of unknown function of the putative DNA transposon DDT-B%3B refer to AF298202 for full-length consensus element	NA	NA	NA	NA	NA	NA
DDB0232428	65064	TTTCAAAAAATATAAGGATC	6	GATCAAATTACAATTTTTAT	5	not_unique	GATC	DDB_G0267250	+	DDB_G0267250_TE	ORF1 encoding a protein of unknown function of the putative DNA transposon DDT-B%3B refer to AF298202 for full-length consensus element	NA	NA	NA	NA	NA	NA
DDB0232428	65115	AGCTAAAATCATTCCAGATC	5	GATCATTTACCACCATCAGA	5	not_unique	GATC	DDB_G0267250	+	DDB_G0267250_TE	ORF1 encoding a protein of unknown function of the putative DNA transposon DDT-B%3B refer to AF298202 for full-length consensus element	NA	NA	NA	NA	NA	NA
DDB0232428	65505	CAATACAAACAACCAAGATC	6	GATCAACATAAATTTGAAAG	5	not_unique	GATC	DDB_G0267250	+	DDB_G0267250_TE	ORF1 encoding a protein of unknown function of the putative DNA transposon DDT-B%3B refer to AF298202 for full-length consensus element	NA	NA	NA	NA	NA	NA
DDB0232428	65886	TGATAAAGATACAGGTGATC	4	GATCAAAATAATAAGTACCA	4	not_unique	GATC	DDB_G0267250	+	DDB_G0267250_TE	ORF1 encoding a protein of unknown function of the putative DNA transposon DDT-B%3B refer to AF298202 for full-length consensus element	NA	NA	NA	NA	NA	NA
DDB0232428	66253	GGTAATTATGTAAATAGATC	6	GATCATCTTTAACTTCACCA	5	not_unique	GATC	DDB_G0267252	+	DDB_G0267252	NA	NA	NA	NA	NA	NA	NA
DDB0232428	66988	AGAAGCTTTTGACTCCGATC	4	GATCCTTTTGTAAAGTTCTT	4	not_unique	GATC	DDB_G0267252	+	DDB_G0267252	NA	NA	NA	NA	NA	NA	NA
DDB0232428	69190	AAAATATCCAACAAATGATC	11	GATCCAGATGACCCATGTAA	11	not_unique	GATC	DDB_G0267254	+	DDB_G0267254_ps	putative pseudogene	NA	NA	NA	NA	NA	NA
DDB0232428	69676	TATAAATAAAAATTATGATC	14	GATCACTCAATTTTTTATTT	15	not_unique	GATC	DDB_G0267254	+	DDB_G0267254_ps	putative pseudogene	NA	NA	NA	NA	NA	NA
DDB0232428	70571	AAAGGAAGAGAGAATAGATC	10	GATCAATATTATATTACCTT	10	not_unique	GATC	DDB_G0267254	+	DDB_G0267254_ps	putative pseudogene	NA	NA	NA	NA	NA	NA
DDB0232428	72983	TTTCGCCGCTGTGGTTGATC	1	GATCACAGTGCAGATACGTT	1	unique	GATC	NA	NA	NA	NA	DDB_G0267254	DDB_G0267258	+	-	274	1559
DDB0232428	73058	TGTAGCAATTTGACCAGATC	1	GATCTACCTTATTTTTTTTC	1	unique	GATC	NA	NA	NA	NA	DDB_G0267254	DDB_G0267258	+	-	349	1484
DDB0232428	73346	GCTTTTACTAAATGCTGATC	1	GATCTACCAAGAGATAATTG	1	unique	GATC	NA	NA	NA	NA	DDB_G0267254	DDB_G0267258	+	-	637	1196
DDB0232428	73592	CTATCTTCATCCATGTGATC	1	GATCTACTTGTTCATTGGGC	1	unique	GATC	NA	NA	NA	NA	DDB_G0267254	DDB_G0267258	+	-	883	950
DDB0232428	73666	TGCGTAAGTCCGAAACGATC	1	GATCATGGCTGCTGTTGAAG	1	unique	GATC	NA	NA	NA	NA	DDB_G0267254	DDB_G0267258	+	-	957	876
DDB0232428	74070	ACCGGCACAATGACGCGATC	38	GATCATTGCGCAAGGTCGAA	24	not_unique	GATC	NA	NA	NA	NA	DDB_G0267254	DDB_G0267258	+	-	1361	472
DDB0232428	75041	CTTCACCAAGTCTGATGATC	21	GATCTTGCTAAACCAAACAT	21	not_unique	GATC	DDB_G0267258	-	DDB_G0267258_RTE	ORF2 protein fragment of DIRS1 retrotransposon%3B refer to Genbank M11339 for full-length element	NA	NA	NA	NA	NA	NA
DDB0232428	75228	ATTCTTGTAATGAATGGATC	11	GATCATTAACAATATCAGTT	22	not_unique	GATC	DDB_G0267258	-	DDB_G0267258_RTE	ORF2 protein fragment of DIRS1 retrotransposon%3B refer to Genbank M11339 for full-length element	NA	NA	NA	NA	NA	NA
DDB0232428	75281	CAACTGATTCAACATAGATC	5	GATCGATGACCGTTAATTGT	4	not_unique	GATC	DDB_G0267258	-	DDB_G0267258_RTE	ORF2 protein fragment of DIRS1 retrotransposon%3B refer to Genbank M11339 for full-length element	NA	NA	NA	NA	NA	NA
DDB0232428	75685	CGGATACCAAGTTGCTGATC	22	GATCTCCAGATTGGGAAGAT	23	not_unique	GATC	DDB_G0267258	-	DDB_G0267258_RTE	ORF2 protein fragment of DIRS1 retrotransposon%3B refer to Genbank M11339 for full-length element	NA	NA	NA	NA	NA	NA
DDB0232428	75702	ATCTCCAGATTGGGAAGATC	23	GATCAGTATTATAGAAACCT	19	not_unique	GATC	DDB_G0267258	-	DDB_G0267258_RTE	ORF2 protein fragment of DIRS1 retrotransposon%3B refer to Genbank M11339 for full-length element	NA	NA	NA	NA	NA	NA
DDB0232428	75881	AGGTGAGATGCGAACAGATC	19	GATCCATCTGTATTTGACCG	23	not_unique	GATC	DDB_G0267258	-	DDB_G0267258_RTE	ORF2 protein fragment of DIRS1 retrotransposon%3B refer to Genbank M11339 for full-length element	NA	NA	NA	NA	NA	NA
DDB0232428	76106	TCGAACAGAACTGAGAGATC	17	GATCTTGTATTTGACCACCC	9	not_unique	GATC	DDB_G0267258	-	DDB_G0267258_RTE	ORF2 protein fragment of DIRS1 retrotransposon%3B refer to Genbank M11339 for full-length element	NA	NA	NA	NA	NA	NA
DDB0232428	76466	GGAATGGGGAATGATTGATC	15	GATCCCAATCTCCATTGGCT	16	not_unique	GATC	DDB_G0267258	-	DDB_G0267258_RTE	ORF2 protein fragment of DIRS1 retrotransposon%3B refer to Genbank M11339 for full-length element	NA	NA	NA	NA	NA	NA
DDB0232428	76838	GAACCTACGATTAATAGATC	3	GATCGTCCAAGTAAGCGATG	17	not_unique	GATC	NA	NA	NA	NA	DDB_G0267258	DDB_G0267260	-	-	32	618
DDB0232428	77006	AAGTCTCTGTATTGTGGATC	11	GATCTACTAATACGTGGAGG	4	not_unique	GATC	NA	NA	NA	NA	DDB_G0267258	DDB_G0267260	-	-	200	450
DDB0232428	77541	TGCAACATTACTTGGTGATC	17	GATCCATTGAAGTTGTTAGA	22	not_unique	GATC	DDB_G0267260	-	DDB_G0267260_RTE	ORF1 protein of DIRS1 retrotransposon%3B refer to Genbank M11339 for full-length element	NA	NA	NA	NA	NA	NA
DDB0232428	77559	TCCATTGAAGTTGTTAGATC	22	GATCGGCCATTACTCCCACT	21	not_unique	GATC	DDB_G0267260	-	DDB_G0267260_RTE	ORF1 protein of DIRS1 retrotransposon%3B refer to Genbank M11339 for full-length element	NA	NA	NA	NA	NA	NA
DDB0232428	77771	TCTTTGGTGTATCCTTGATC	19	GATCTTAATTGGTAAGAGTA	20	not_unique	GATC	DDB_G0267260	-	DDB_G0267260_RTE	ORF1 protein of DIRS1 retrotransposon%3B refer to Genbank M11339 for full-length element	NA	NA	NA	NA	NA	NA
DDB0232428	78367	GAAAGGTTGTTGATTTGATC	31	GATCTTCCATTGATTTCATT	6	not_unique	GATC	DDB_G0267260	-	DDB_G0267260_RTE	ORF1 protein of DIRS1 retrotransposon%3B refer to Genbank M11339 for full-length element	NA	NA	NA	NA	NA	NA
DDB0232428	79433	GGAATGGGGAATGATTGATC	15	GATCCCAATCTCCATTGGCT	16	not_unique	GATC	DDB_G0267262	-	DDB_G0267262_RTE	ORF2 protein fragment of DIRS1 retrotransposon%3B refer to Genbank M11339 for full-length element	NA	NA	NA	NA	NA	NA
DDB0232428	79797	CTTTTGTTGAACCGACGATC	1	GATCAATAGATCGTCCAAGT	1	unique	GATC	NA	NA	NA	NA	DDB_G0267262	DDB_G0267270	-	-	24	8772
DDB0232428	79805	GAACCGACGATCAATAGATC	1	GATCGTCCAAGTAAGCGATG	17	unique_one	GATC	NA	NA	NA	NA	DDB_G0267262	DDB_G0267270	-	-	32	8764
DDB0232428	80153	TTCGACCTTGCGCAATGATC	24	GATCGCGTCATTGTGCCGGT	38	not_unique	GATC	NA	NA	NA	NA	DDB_G0267262	DDB_G0267270	-	-	380	8416
DDB0232428	80697	CCTACACGTGTTAGTAGATC	4	GATCCACAATACAGACTTAT	1	unique_one	GATC	NA	NA	NA	NA	DDB_G0267262	DDB_G0267270	-	-	924	7872
DDB0232428	80847	CATCGCTTACTTGGACGATC	17	GATCTATTAATCGTCGGTTC	22	not_unique	GATC	NA	NA	NA	NA	DDB_G0267262	DDB_G0267270	-	-	1074	7722
DDB0232428	81219	AGCCAATGGAGATTGGGATC	16	GATCAATCATTCCCCATTCC	15	not_unique	GATC	NA	NA	NA	NA	DDB_G0267262	DDB_G0267270	-	-	1446	7350
DDB0232428	81579	AGGTGGTCAAATACAAGATC	2	GATCTCTCAGTTCTATTCGA	4	not_unique	GATC	NA	NA	NA	NA	DDB_G0267262	DDB_G0267270	-	-	1806	6990
DDB0232428	81804	CGGTCAAATACAGATGGATC	23	GATCTATTCGCATCTCACCT	1	unique_one	GATC	NA	NA	NA	NA	DDB_G0267262	DDB_G0267270	-	-	2031	6765
DDB0232428	81983	AGGTTTCTATAATACTGATC	19	GATCTTCCCAATCTGGAGAT	23	not_unique	GATC	NA	NA	NA	NA	DDB_G0267262	DDB_G0267270	-	-	2210	6586
DDB0232428	82000	ATCTTCCCAATCTGGAGATC	23	GATCAGCAACTTGGTATCCG	22	not_unique	GATC	NA	NA	NA	NA	DDB_G0267262	DDB_G0267270	-	-	2227	6569
DDB0232428	82457	AACTGATATTGTTAATGATC	22	GATCCATTCATCACAAGAAT	11	not_unique	GATC	NA	NA	NA	NA	DDB_G0267262	DDB_G0267270	-	-	2684	6112
DDB0232428	82644	ATGTTTGGTTTAGCAAGATC	21	GATCATCAGACTTGGTGAAG	21	not_unique	GATC	NA	NA	NA	NA	DDB_G0267262	DDB_G0267270	-	-	2871	5925
DDB0232428	84672	CTTCACCAAGTCTGATGATC	21	GATCTTGCTAAACCAAACAT	21	not_unique	GATC	NA	NA	NA	NA	DDB_G0267262	DDB_G0267270	-	-	4899	3897
DDB0232428	84859	ATTCTTGTGATGAATGGATC	11	GATCATTAACAATATCAGTT	22	not_unique	GATC	NA	NA	NA	NA	DDB_G0267262	DDB_G0267270	-	-	5086	3710
DDB0232428	85316	CGGATACCAAGTTGCTGATC	22	GATCTCCAGATTGGGAAGAC	1	unique_one	GATC	NA	NA	NA	NA	DDB_G0267262	DDB_G0267270	-	-	5543	3253
DDB0232428	85512	AGGTGAGATGCGAACAGATC	19	GATCCATCTGTATTTGACCG	23	not_unique	GATC	NA	NA	NA	NA	DDB_G0267262	DDB_G0267270	-	-	5739	3057
DDB0232428	85737	TCGAACAGAACTGAGAGATC	17	GATCTTGTATTTGACCACCC	9	not_unique	GATC	NA	NA	NA	NA	DDB_G0267262	DDB_G0267270	-	-	5964	2832
DDB0232428	86097	GGAATGGGGAATGATTGATC	15	GATCCCAATCTCCATTGGCT	16	not_unique	GATC	NA	NA	NA	NA	DDB_G0267262	DDB_G0267270	-	-	6324	2472
DDB0232428	86469	GAACCGACGATTAATAGATC	22	GATCGTCCAAGTAAGCGATG	17	not_unique	GATC	NA	NA	NA	NA	DDB_G0267262	DDB_G0267270	-	-	6696	2100
DDB0232428	86637	AAGTCTCTGTATTGTGGATC	11	GATCTACTAACACGTGGAGG	3	not_unique	GATC	NA	NA	NA	NA	DDB_G0267262	DDB_G0267270	-	-	6864	1932
DDB0232428	87172	TGCAACAATACTTGGTGATC	1	GATCCATTGAAGTTGTTAGA	22	unique_one	GATC	NA	NA	NA	NA	DDB_G0267262	DDB_G0267270	-	-	7399	1397
DDB0232428	87190	TCCATTGAAGTTGTTAGATC	22	GATCGGCCATTACTCCCACT	21	not_unique	GATC	NA	NA	NA	NA	DDB_G0267262	DDB_G0267270	-	-	7417	1379
DDB0232428	87402	TCTTTGGTGTATCCTTGATC	19	GATCTTAATTCGTAAGAGTA	1	unique_one	GATC	NA	NA	NA	NA	DDB_G0267262	DDB_G0267270	-	-	7629	1167
DDB0232428	88118	TACCCAAAAGGGATTCGATC	7	GATCCCCCGACCCTCTATCA	29	not_unique	GATC	NA	NA	NA	NA	DDB_G0267262	DDB_G0267270	-	-	8345	451
DDB0232428	88235	TTTTGTGCTAAAATTAGATC	7	GATCTTTTTTATTAAAAACC	36	not_unique	GATC	NA	NA	NA	NA	DDB_G0267262	DDB_G0267270	-	-	8462	334
DDB0232428	88748	GAAAGGTTGTTGATTTGATC	31	GATCCTCCATTGACTTCATT	3	not_unique	GATC	DDB_G0267270	-	DDB_G0267270_RTE	small ORF1 protein fragment of DIRS1 retrotransposon%3B refer to Genbank M11339 for full-length element	NA	NA	NA	NA	NA	NA
DDB0232428	89138	TTCGACCTTACACAATGATC	10	GATCGCGTCATTGTGCCGGT	38	not_unique	GATC	NA	NA	NA	NA	DDB_G0267270	DDB_G0267272	-	+	294	178
DDB0232428	89545	AACTGATATTGCTAATGATC	1	GATCCATTCATCACAAGAAT	11	unique_one	GATC	DDB_G0267272	+	DDB_G0267272_RTE	ORF2 protein fragment of DIRS1 retrotransposon%3B refer to Genbank M11339 for full-length element	NA	NA	NA	NA	NA	NA
DDB0232428	89732	ATGTTTGGTTTAGCAAGATC	21	GATCATCAGACTTGGTGAAG	21	not_unique	GATC	DDB_G0267272	+	DDB_G0267272_RTE	ORF2 protein fragment of DIRS1 retrotransposon%3B refer to Genbank M11339 for full-length element	NA	NA	NA	NA	NA	NA
DDB0232428	90493	TTCGACCTTGCGCAATGATC	24	GATCGCGTCATTGTGCCGGT	38	not_unique	GATC	NA	NA	NA	NA	DDB_G0267272	DDB_G0267274	+	+	102	226
DDB0232428	90761	AAAATATCCAACAAATGATC	11	GATCCAGATGACCCATGTAA	11	not_unique	GATC	DDB_G0267274	+	DDB_G0267274_TE	ORF1 encoding a protein of unknown function of the putative DNA transposon DDT-A%3B refer to AF298201 for full-length consensus element	NA	NA	NA	NA	NA	NA
DDB0232428	90925	CAATGAAATTATAATGGATC	3	GATCAAAATGAAGCAAACAT	3	not_unique	GATC	DDB_G0267274	+	DDB_G0267274_TE	ORF1 encoding a protein of unknown function of the putative DNA transposon DDT-A%3B refer to AF298201 for full-length consensus element	NA	NA	NA	NA	NA	NA
DDB0232428	91246	TATAAATAAAAATTATGATC	14	GATCACTCAATTTTTTATTT	15	not_unique	GATC	DDB_G0267274	+	DDB_G0267274_TE	ORF1 encoding a protein of unknown function of the putative DNA transposon DDT-A%3B refer to AF298201 for full-length consensus element	NA	NA	NA	NA	NA	NA
DDB0232428	92141	AAAGGAAGAGATAATAGATC	1	GATCAATATTATATTACCTT	10	unique_one	GATC	DDB_G0267274	+	DDB_G0267274_TE	ORF1 encoding a protein of unknown function of the putative DNA transposon DDT-A%3B refer to AF298201 for full-length consensus element	NA	NA	NA	NA	NA	NA
DDB0232428	95405	AAATAAAAAATTGAGTGATC	15	GATCATAATTTTTATTTATA	14	not_unique	GATC	DDB_G0267280	-	DDB_G0267280_TE	ORF1 encoding a protein of unknown function of the putative DNA transposon DDT-A%3B refer to AF298201 for full-length consensus element	NA	NA	NA	NA	NA	NA
DDB0232428	95891	TTACATGGGTCATCTGGATC	11	GATCATTTGTTGGATATTTT	11	not_unique	GATC	DDB_G0267280	-	DDB_G0267280_TE	ORF1 encoding a protein of unknown function of the putative DNA transposon DDT-A%3B refer to AF298201 for full-length consensus element	NA	NA	NA	NA	NA	NA
DDB0232428	97229	TGCAACATTACTTGGTGATC	17	GATCCATTGAAGTTGTTAGA	22	not_unique	GATC	DDB_G0267282	-	DDB_G0267282_RTE	ORF1 protein fragment of DIRS1 retrotransposon%3B refer to Genbank M11339 for full-length element	NA	NA	NA	NA	NA	NA
DDB0232428	97247	TCCATTGAAGTTGTTAGATC	22	GATCGGCCATTACTCCCACT	21	not_unique	GATC	DDB_G0267282	-	DDB_G0267282_RTE	ORF1 protein fragment of DIRS1 retrotransposon%3B refer to Genbank M11339 for full-length element	NA	NA	NA	NA	NA	NA
DDB0232428	97459	TCTTTGGTGTATCCTTGATC	19	GATCTTAATTGGTAAGAGTA	20	not_unique	GATC	DDB_G0267282	-	DDB_G0267282_RTE	ORF1 protein fragment of DIRS1 retrotransposon%3B refer to Genbank M11339 for full-length element	NA	NA	NA	NA	NA	NA
DDB0232428	97977	GAAAGGTTGTTGATTTGATC	31	GATCCTCCATTGATTTCATT	24	not_unique	GATC	DDB_G0267282	-	DDB_G0267282_RTE	ORF1 protein fragment of DIRS1 retrotransposon%3B refer to Genbank M11339 for full-length element	NA	NA	NA	NA	NA	NA
DDB0232428	98367	TTCGACCTTGCGCAATGATC	24	GATCGCGTCATTGTGCCGGT	38	not_unique	GATC	NA	NA	NA	NA	DDB_G0267282	DDB_G0267286	-	-	294	2387
DDB0232428	98468	TATCTTAAATATTTGGGATC	1	GATCGCGTCATTGTGCCGGT	38	unique_one	GATC	NA	NA	NA	NA	DDB_G0267282	DDB_G0267286	-	-	395	2286
DDB0232428	98758	AGATATCATCATTAGCGATC	1	GATCAACTTAAATAAATAGT	2	unique_one	GATC	NA	NA	NA	NA	DDB_G0267282	DDB_G0267286	-	-	685	1996
DDB0232428	98808	GTAGTGGGCATTTCTGGATC	2	GATCGATAAGGTAAGCGTGA	2	not_unique	GATC	NA	NA	NA	NA	DDB_G0267282	DDB_G0267286	-	-	735	1946
DDB0232428	99624	CACATTCTGTAATTTGGATC	3	GATCATGCTGGGTGTTATTT	1	unique_one	GATC	NA	NA	NA	NA	DDB_G0267282	DDB_G0267286	-	-	1551	1130
DDB0232428	99914	GCTTGATTACTTTGCTGATC	3	GATCTCCAGCGGCTGATAAC	1	unique_one	GATC	NA	NA	NA	NA	DDB_G0267282	DDB_G0267286	-	-	1841	840
DDB0232428	100397	AAAACATCTAATTTTAGATC	5	GATCAAAAAAATGGGGATAA	8	not_unique	GATC	NA	NA	NA	NA	DDB_G0267282	DDB_G0267286	-	-	2324	357
DDB0232428	100880	CATGGTAGTTTTCTTTGATC	1	GATCGCATCAGAAACCGCCC	2	unique_one	GATC	DDB_G0267286	-	DDB_G0267286	NA	NA	NA	NA	NA	NA	NA
DDB0232428	101118	CTCTTAGGCTTTCATCGATC	1	GATCCCCGTTCGTGACCGTT	1	unique	GATC	NA	NA	NA	NA	DDB_G0267286	DDB_G0267292	-	+	92	3105
DDB0232428	101152	TTTAGCGATTTCTTTAGATC	1	GATCTTAATTGGTAGAGAAT	1	unique	GATC	NA	NA	NA	NA	DDB_G0267286	DDB_G0267292	-	+	126	3071
DDB0232428	101486	ATAACGGAATATTTTTGATC	3	GATCTATCGATATTAAGCAT	3	not_unique	GATC	NA	NA	NA	NA	DDB_G0267286	DDB_G0267292	-	+	460	2737
DDB0232428	101605	GCTTTTACTTAATGCTGATC	2	GATCTACCAACACAGCGAAG	2	not_unique	GATC	NA	NA	NA	NA	DDB_G0267286	DDB_G0267292	-	+	579	2618
DDB0232428	101749	CTTCGCTGTGTTGGTAGATC	2	GATCAGCATTAAGTAAAAGC	2	not_unique	GATC	NA	NA	NA	NA	DDB_G0267286	DDB_G0267292	-	+	723	2474
DDB0232428	101868	ATGCTTAATATCGATAGATC	3	GATCAAAAATATTCCGTTAT	3	not_unique	GATC	NA	NA	NA	NA	DDB_G0267286	DDB_G0267292	-	+	842	2355
DDB0232428	102168	TTACCAAAAGGGATTCGATC	34	GATCCCCCGACCCTCTATCA	29	not_unique	GATC	NA	NA	NA	NA	DDB_G0267286	DDB_G0267292	-	+	1142	2055
DDB0232428	102284	TTTTGTTCTAAAATTAGATC	21	GATCTTTTTTATTAAAAACC	36	not_unique	GATC	NA	NA	NA	NA	DDB_G0267286	DDB_G0267292	-	+	1258	1939
DDB0232428	102652	TTCTTTGCTGTGAAGAGATC	1	GATCCAGTTCTACCATTCTG	2	unique_one	GATC	NA	NA	NA	NA	DDB_G0267286	DDB_G0267292	-	+	1626	1571
DDB0232428	102688	GCGATGCTTGCTTGCCGATC	1	GATCAGTCATTAACGAATCT	4	unique_one	GATC	NA	NA	NA	NA	DDB_G0267286	DDB_G0267292	-	+	1662	1535
DDB0232428	102914	TCGTCATAATAATTTTGATC	1	GATCTTTTGGAGTACTTGCA	1	unique	GATC	NA	NA	NA	NA	DDB_G0267286	DDB_G0267292	-	+	1888	1309
DDB0232428	103003	ACTTTACATATCAATAGATC	2	GATCAAAAATAAGAGGATGT	1	unique_one	GATC	NA	NA	NA	NA	DDB_G0267286	DDB_G0267292	-	+	1977	1220
DDB0232428	103110	ACACGCCCGCGATTAAGATC	1	GATCAACAATACCGTAGTTC	2	unique_one	GATC	NA	NA	NA	NA	DDB_G0267286	DDB_G0267292	-	+	2084	1113
DDB0232428	103279	ACCTGTTAATGCTGTTGATC	1	GATCTTATCCCAATTACGTG	2	unique_one	GATC	NA	NA	NA	NA	DDB_G0267286	DDB_G0267292	-	+	2253	944
DDB0232428	103931	ACCGGCACAATGACGCGATC	38	GATCATTGCGCAAGGTCGAA	24	not_unique	GATC	NA	NA	NA	NA	DDB_G0267286	DDB_G0267292	-	+	2905	292
DDB0232428	104322	AATGAAATCAATGGAGGATC	24	GATCAAATCAACAACCTTTC	31	not_unique	GATC	DDB_G0267292	+	DDB_G0267292_RTE	ORF1 protein of DIRS1 retrotransposon%3B refer to Genbank M11339 for full-length element	NA	NA	NA	NA	NA	NA
DDB0232428	104918	TACTCTTACCAATTAAGATC	20	GATCAAGGATACACCAAAGA	19	not_unique	GATC	DDB_G0267292	+	DDB_G0267292_RTE	ORF1 protein of DIRS1 retrotransposon%3B refer to Genbank M11339 for full-length element	NA	NA	NA	NA	NA	NA
DDB0232428	105130	AGTGGGAGTAATGGCCGATC	21	GATCTAACAACTTCAATGGA	22	not_unique	GATC	DDB_G0267292	+	DDB_G0267292_RTE	ORF1 protein of DIRS1 retrotransposon%3B refer to Genbank M11339 for full-length element	NA	NA	NA	NA	NA	NA
DDB0232428	105148	TCTAACAACTTCAATGGATC	22	GATCACCAAGTAATGTTGCA	17	not_unique	GATC	DDB_G0267292	+	DDB_G0267292_RTE	ORF1 protein of DIRS1 retrotransposon%3B refer to Genbank M11339 for full-length element	NA	NA	NA	NA	NA	NA
DDB0232428	105683	CCTCCACGTTTTAGTAGATC	8	GATCCGCAATACAGAGACTT	9	not_unique	GATC	NA	NA	NA	NA	DDB_G0267292	DDB_G0267294	+	+	453	197
DDB0232428	105851	CATCGCATACTTGGACGATC	4	GATCTATTAATCGTCGGTTC	22	not_unique	GATC	NA	NA	NA	NA	DDB_G0267292	DDB_G0267294	+	+	621	29
DDB0232428	106223	AGCCAATGGAGATTGGGATC	16	GATCAATCATTCCCCATTCC	15	not_unique	GATC	DDB_G0267294	+	DDB_G0267294_RTE	ORF2 protein fragment of DIRS1 retrotransposon%3B refer to Genbank M11339 for full-length element	NA	NA	NA	NA	NA	NA
DDB0232428	106522	ACAACTGCAAGCTGAAGATC	2	GATCCAAACCGACAATACTA	2	not_unique	GATC	DDB_G0267294	+	DDB_G0267294_RTE	ORF2 protein fragment of DIRS1 retrotransposon%3B refer to Genbank M11339 for full-length element	NA	NA	NA	NA	NA	NA
DDB0232428	106583	GGGTGGTCAGATACAAGATC	6	GATCTCTCAGTTCTGTTCGA	17	not_unique	GATC	DDB_G0267294	+	DDB_G0267294_RTE	ORF2 protein fragment of DIRS1 retrotransposon%3B refer to Genbank M11339 for full-length element	NA	NA	NA	NA	NA	NA
DDB0232428	106808	CGGTCAAATACAGATGGATC	23	GATCTGTTCGCATCTCACCT	19	not_unique	GATC	DDB_G0267294	+	DDB_G0267294_RTE	ORF2 protein fragment of DIRS1 retrotransposon%3B refer to Genbank M11339 for full-length element	NA	NA	NA	NA	NA	NA
DDB0232428	106987	AGGTTTCTATAATACTGATC	19	GATCTTCCCAATCTGGAGAT	23	not_unique	GATC	DDB_G0267294	+	DDB_G0267294_RTE	ORF2 protein fragment of DIRS1 retrotransposon%3B refer to Genbank M11339 for full-length element	NA	NA	NA	NA	NA	NA
DDB0232428	107004	ATCTTCCCAATCTGGAGATC	23	GATCAGCAACTTGGTATCCG	22	not_unique	GATC	DDB_G0267294	+	DDB_G0267294_RTE	ORF2 protein fragment of DIRS1 retrotransposon%3B refer to Genbank M11339 for full-length element	NA	NA	NA	NA	NA	NA
DDB0232428	107408	ACTATTAACGGTCATCGATC	2	GATCTATGTTGAATCAGTTG	5	not_unique	GATC	DDB_G0267294	+	DDB_G0267294_RTE	ORF2 protein fragment of DIRS1 retrotransposon%3B refer to Genbank M11339 for full-length element	NA	NA	NA	NA	NA	NA
DDB0232428	107461	AACTGATATTGTTAATGATC	22	GATCCATTCATTACAAGAAT	11	not_unique	GATC	DDB_G0267294	+	DDB_G0267294_RTE	ORF2 protein fragment of DIRS1 retrotransposon%3B refer to Genbank M11339 for full-length element	NA	NA	NA	NA	NA	NA
DDB0232428	107648	ATGTTTGGTTTAGCAAGATC	21	GATCATCAGACTTGGTGAAG	21	not_unique	GATC	DDB_G0267294	+	DDB_G0267294_RTE	ORF2 protein fragment of DIRS1 retrotransposon%3B refer to Genbank M11339 for full-length element	NA	NA	NA	NA	NA	NA
DDB0232428	108416	TTCGACCTTGCGCAATGATC	24	GATCGCGTCATTGTGCCGGT	38	not_unique	GATC	NA	NA	NA	NA	DDB_G0267294	DDB_G0267296	+	-	272	177
DDB0232428	109095	CTTCACCAAGTCTGATGATC	21	GATCTTGATAAACCAAACAT	2	not_unique	GATC	DDB_G0267296	-	DDB_G0267296_RTE	ORF2 protein fragment of DIRS1 retrotransposon%3B refer to Genbank M11339 for full-length element	NA	NA	NA	NA	NA	NA
DDB0232428	110061	AAGGTAATATAATATTGATC	10	GATCTATTCTCTCTTCCTTT	10	not_unique	GATC	NA	NA	NA	NA	DDB_G0267298	DDB_G0267300	-	+	64	722
DDB0232428	110975	TAGCCCACCTTCTCATGATC	1	GATCACTCTGACACCGAGAA	1	unique	GATC	DDB_G0267300	+	DDB_G0267300_RTE	ORF1%2FORF2 protein fragment of DIRS1 retrotransposon%3B refer to Genbank M11339 for full-length element	NA	NA	NA	NA	NA	NA
DDB0232428	111436	TACTCTTACCAATTAAGATC	20	GATCAAGGATACACCAAAGA	19	not_unique	GATC	DDB_G0267300	+	DDB_G0267300_RTE	ORF1%2FORF2 protein fragment of DIRS1 retrotransposon%3B refer to Genbank M11339 for full-length element	NA	NA	NA	NA	NA	NA
DDB0232428	111648	AGTGGGAGTAATGGCCGATC	21	GATCTAACAACTTCAATGGA	22	not_unique	GATC	DDB_G0267300	+	DDB_G0267300_RTE	ORF1%2FORF2 protein fragment of DIRS1 retrotransposon%3B refer to Genbank M11339 for full-length element	NA	NA	NA	NA	NA	NA
DDB0232428	111666	TCTAACAACTTCAATGGATC	22	GATCACCAAGTAATGTTGCA	17	not_unique	GATC	DDB_G0267300	+	DDB_G0267300_RTE	ORF1%2FORF2 protein fragment of DIRS1 retrotransposon%3B refer to Genbank M11339 for full-length element	NA	NA	NA	NA	NA	NA
DDB0232428	111978	GGGTGGTCAAATACAAGATC	9	GATCTCTCAGTTCTGTTCGA	17	not_unique	GATC	DDB_G0267300	+	DDB_G0267300_RTE	ORF1%2FORF2 protein fragment of DIRS1 retrotransposon%3B refer to Genbank M11339 for full-length element	NA	NA	NA	NA	NA	NA
DDB0232428	112203	CGGTCAAATACAGATGGATC	23	GATCTGTTCGCATCTCACCT	19	not_unique	GATC	DDB_G0267300	+	DDB_G0267300_RTE	ORF1%2FORF2 protein fragment of DIRS1 retrotransposon%3B refer to Genbank M11339 for full-length element	NA	NA	NA	NA	NA	NA
DDB0232428	112382	AGGTTTCTATAATACTGATC	19	GATCTTCCCAATCTGGAGAT	23	not_unique	GATC	DDB_G0267300	+	DDB_G0267300_RTE	ORF1%2FORF2 protein fragment of DIRS1 retrotransposon%3B refer to Genbank M11339 for full-length element	NA	NA	NA	NA	NA	NA
DDB0232428	112399	ATCTTCCCAATCTGGAGATC	23	GATCAGCAACTTGGTATCCG	22	not_unique	GATC	DDB_G0267300	+	DDB_G0267300_RTE	ORF1%2FORF2 protein fragment of DIRS1 retrotransposon%3B refer to Genbank M11339 for full-length element	NA	NA	NA	NA	NA	NA
DDB0232428	114352	ACATCGTCCAGTTCTCGATC	6	GATCTAAAAAGGTTAAACAC	6	not_unique	GATC	NA	NA	NA	NA	DDB_G0267302	DDB_G0267304	-	+	1028	42
DDB0232428	114490	CCTCTACGTGTTAGTAGATC	1	GATCCACAATACAGAGACTT	11	unique_one	GATC	DDB_G0267304	+	DDB_G0267304_RTE	ORF3 protein fragment of DIRS1 retrotransposon%3B refer to Genbank M11339 for full-length element	NA	NA	NA	NA	NA	NA
DDB0232428	114658	CATCGCTTACTTGGACGATC	17	GATCTATTAATCGTCGGTTC	22	not_unique	GATC	DDB_G0267304	+	DDB_G0267304_RTE	ORF3 protein fragment of DIRS1 retrotransposon%3B refer to Genbank M11339 for full-length element	NA	NA	NA	NA	NA	NA
DDB0232428	115021	AGCCAATGGAGATTGGGATC	16	GATCAATCGTTCCCCATTCC	1	unique_one	GATC	DDB_G0267304	+	DDB_G0267304_RTE	ORF3 protein fragment of DIRS1 retrotransposon%3B refer to Genbank M11339 for full-length element	NA	NA	NA	NA	NA	NA
DDB0232428	115381	GGGTGGTCAGATACAAGATC	6	GATCTCTCAGTTCTGTTCGA	17	not_unique	GATC	DDB_G0267304	+	DDB_G0267304_RTE	ORF3 protein fragment of DIRS1 retrotransposon%3B refer to Genbank M11339 for full-length element	NA	NA	NA	NA	NA	NA
DDB0232428	115780	AGGTTTCTTTAATACTGATC	1	GATCTTCCCAATCTGGAGAT	23	unique_one	GATC	DDB_G0267304	+	DDB_G0267304_RTE	ORF3 protein fragment of DIRS1 retrotransposon%3B refer to Genbank M11339 for full-length element	NA	NA	NA	NA	NA	NA
DDB0232428	115797	ATCTTCCCAATCTGGAGATC	23	GATCAGCAACTTGGTATCCG	22	not_unique	GATC	DDB_G0267304	+	DDB_G0267304_RTE	ORF3 protein fragment of DIRS1 retrotransposon%3B refer to Genbank M11339 for full-length element	NA	NA	NA	NA	NA	NA
DDB0232428	116254	AACTGATATTGTTAATGATC	22	GATCCATTCATCACAAGAAT	11	not_unique	GATC	DDB_G0267304	+	DDB_G0267304_RTE	ORF3 protein fragment of DIRS1 retrotransposon%3B refer to Genbank M11339 for full-length element	NA	NA	NA	NA	NA	NA
DDB0232428	116441	ACGTTTGGTTTAGCAAGATC	1	GATCATCAGACTTGGTGAAG	21	unique_one	GATC	DDB_G0267304	+	DDB_G0267304_RTE	ORF3 protein fragment of DIRS1 retrotransposon%3B refer to Genbank M11339 for full-length element	NA	NA	NA	NA	NA	NA
DDB0232428	117365	TGTAACTTTTCTTCCTGATC	10	GATCTTGTTGTTTTAATTTG	3	not_unique	GATC	DDB_G0267306	-	DDB_G0267306_RTE	long terminal repeat retrotransposon Skipper GAG-PRO-POL%3B refer to GenBank AF049230 for full length consensus element	NA	NA	NA	NA	NA	NA
DDB0232428	117393	TTAATTTGTAAACTAAGATC	11	GATCAAGTTCATCATCATCA	10	not_unique	GATC	DDB_G0267306	-	DDB_G0267306_RTE	long terminal repeat retrotransposon Skipper GAG-PRO-POL%3B refer to GenBank AF049230 for full length consensus element	NA	NA	NA	NA	NA	NA
DDB0232428	117655	ACTAGTTTTACGATTTGATC	1	GATCCTTGTTGTACACATTG	1	unique	GATC	DDB_G0267306	-	DDB_G0267306_RTE	long terminal repeat retrotransposon Skipper GAG-PRO-POL%3B refer to GenBank AF049230 for full length consensus element	NA	NA	NA	NA	NA	NA
DDB0232428	117778	AGTTTGTGAGAGATTAGATC	8	GATCTTTTGAAAGGTTAGTT	4	not_unique	GATC	DDB_G0267306	-	DDB_G0267306_RTE	long terminal repeat retrotransposon Skipper GAG-PRO-POL%3B refer to GenBank AF049230 for full length consensus element	NA	NA	NA	NA	NA	NA
DDB0232428	118243	TCTGAAAGGAATCTTGGATC	8	GATCTCTATCGGAGACGATT	10	not_unique	GATC	DDB_G0267306	-	DDB_G0267306_RTE	long terminal repeat retrotransposon Skipper GAG-PRO-POL%3B refer to GenBank AF049230 for full length consensus element	NA	NA	NA	NA	NA	NA
DDB0232428	118393	ACAATGACACAAACTTGATC	9	GATCGACTTCAACTGTAAAT	9	not_unique	GATC	DDB_G0267306	-	DDB_G0267306_RTE	long terminal repeat retrotransposon Skipper GAG-PRO-POL%3B refer to GenBank AF049230 for full length consensus element	NA	NA	NA	NA	NA	NA
DDB0232428	119011	TATTTAAGATTTTGGTGATC	1	GATCAGTGTAGATTGAAACC	10	unique_one	GATC	DDB_G0267306	-	DDB_G0267306_RTE	long terminal repeat retrotransposon Skipper GAG-PRO-POL%3B refer to GenBank AF049230 for full length consensus element	NA	NA	NA	NA	NA	NA
DDB0232428	119734	TTTGAATGAACCAAAAGATC	10	GATCATCAAAGTATTGTAAT	10	not_unique	GATC	DDB_G0267306	-	DDB_G0267306_RTE	long terminal repeat retrotransposon Skipper GAG-PRO-POL%3B refer to GenBank AF049230 for full length consensus element	NA	NA	NA	NA	NA	NA
DDB0232428	119992	ACCGGAGTGAATGGATGATC	10	GATCGTCTCTAACAGTGACT	9	not_unique	GATC	DDB_G0267306	-	DDB_G0267306_RTE	long terminal repeat retrotransposon Skipper GAG-PRO-POL%3B refer to GenBank AF049230 for full length consensus element	NA	NA	NA	NA	NA	NA
DDB0232428	120096	TGAGTAATTTGATTCTGATC	10	GATCTTTTGATAATACCTAA	10	not_unique	GATC	DDB_G0267306	-	DDB_G0267306_RTE	long terminal repeat retrotransposon Skipper GAG-PRO-POL%3B refer to GenBank AF049230 for full length consensus element	NA	NA	NA	NA	NA	NA
DDB0232428	120157	TCGACATGTCTCTTATGATC	9	GATCATCTGTTGAGTAATAG	5	not_unique	GATC	DDB_G0267306	-	DDB_G0267306_RTE	long terminal repeat retrotransposon Skipper GAG-PRO-POL%3B refer to GenBank AF049230 for full length consensus element	NA	NA	NA	NA	NA	NA
DDB0232428	120205	GTTGGTTCAACATCTTGATC	9	GATCTTTCTTTATTATGATA	4	not_unique	GATC	DDB_G0267306	-	DDB_G0267306_RTE	long terminal repeat retrotransposon Skipper GAG-PRO-POL%3B refer to GenBank AF049230 for full length consensus element	NA	NA	NA	NA	NA	NA
DDB0232428	120262	CTGGAATTGTTAATCTGATC	9	GATCTGGAACATCAGGAAGT	1	unique_one	GATC	DDB_G0267306	-	DDB_G0267306_RTE	long terminal repeat retrotransposon Skipper GAG-PRO-POL%3B refer to GenBank AF049230 for full length consensus element	NA	NA	NA	NA	NA	NA
DDB0232428	121486	GCTTTGGCATCGACCGGATC	7	GATCAATTCTACATGTAGAT	8	not_unique	GATC	DDB_G0267308	-	DDB_G0267308_RTE	ORF1 encoding GAG and protease (PRO) proteins of long terminal repeat retrotransposon Skipper%3B refer to AF049230 for consensus element	NA	NA	NA	NA	NA	NA
DDB0232428	121881	ATTATTATCTAAAATTGATC	10	GATCATAGATACTCTAATTG	1	unique_one	GATC	DDB_G0267310	-	DDB_G0267310_RTE	ORF1 encoding GAG and protease (PRO) proteins of long terminal repeat retrotransposon Skipper%3B refer to AF049230 for consensus element	NA	NA	NA	NA	NA	NA
DDB0232428	122076	TGGAACCAAAGTCTTGGATC	6	GATCTAAAGTTACGGTGGAT	5	not_unique	GATC	DDB_G0267310	-	DDB_G0267310_RTE	ORF1 encoding GAG and protease (PRO) proteins of long terminal repeat retrotransposon Skipper%3B refer to AF049230 for consensus element	NA	NA	NA	NA	NA	NA
DDB0232428	123860	GAACCGACGATTAATAGATC	22	GATCGTCCAAGTAAGCGATG	17	not_unique	GATC	DDB_G0267314	-	DDB_G0267314_RTE	fused fragments of the DIRS1 retrotransposon%3B refer to Genbank M11339 for full-length element	NA	NA	NA	NA	NA	NA
DDB0232428	124028	AAGTCTCTGTATTGCGGATC	9	GATCTACTAACACGTGGAGT	1	unique_one	GATC	DDB_G0267314	-	DDB_G0267314_RTE	fused fragments of the DIRS1 retrotransposon%3B refer to Genbank M11339 for full-length element	NA	NA	NA	NA	NA	NA
DDB0232428	124165	GTGTTTAACCTTTTTAGATC	6	GATCGAGAACTGGACGATGT	6	not_unique	GATC	DDB_G0267314	-	DDB_G0267314_RTE	fused fragments of the DIRS1 retrotransposon%3B refer to Genbank M11339 for full-length element	NA	NA	NA	NA	NA	NA
DDB0232428	124562	TGCAACATTACTTGGTGATC	17	GATCCATTGAAGTTGTTAGA	22	not_unique	GATC	DDB_G0267314	-	DDB_G0267314_RTE	fused fragments of the DIRS1 retrotransposon%3B refer to Genbank M11339 for full-length element	NA	NA	NA	NA	NA	NA
DDB0232428	124580	TCCATTGAAGTTGTTAGATC	22	GATCGGCCATTACTCCCACT	21	not_unique	GATC	DDB_G0267314	-	DDB_G0267314_RTE	fused fragments of the DIRS1 retrotransposon%3B refer to Genbank M11339 for full-length element	NA	NA	NA	NA	NA	NA
DDB0232428	124792	TCTTTGGTGTATTCTTGATC	1	GATCTTAATTGGTAAGAGTA	20	unique_one	GATC	NA	NA	NA	NA	DDB_G0267314	DDB_G0267322	-	-	128	2779
DDB0232428	125680	TTCGACCTTGCGCAATGATC	24	GATCGCGTCACTGTGCCGGT	1	unique_one	GATC	NA	NA	NA	NA	DDB_G0267314	DDB_G0267322	-	-	1016	1891
DDB0232428	126447	GAGATGCCATGCGGTTGATC	1	GATCGTGGTTTACTTACCCC	1	unique	GATC	NA	NA	NA	NA	DDB_G0267314	DDB_G0267322	-	-	1783	1124
DDB0232428	126612	AACCCTCCTATATACTGATC	1	GATCTTACGGACGTGGTGAT	1	unique	GATC	NA	NA	NA	NA	DDB_G0267314	DDB_G0267322	-	-	1948	959
DDB0232428	126657	CACATTCTGTAATTTGGATC	3	GATCACACTGGGTGTTATTT	1	unique_one	GATC	NA	NA	NA	NA	DDB_G0267314	DDB_G0267322	-	-	1993	914
DDB0232428	126710	GTATTTATCGTAGAAGGATC	1	GATCCCACTGTTGCGTTGCA	1	unique	GATC	NA	NA	NA	NA	DDB_G0267314	DDB_G0267322	-	-	2046	861
DDB0232428	128070	CTTCACCAAGTCTGATGATC	21	GATCTTGCTAAACCAAACAT	21	not_unique	GATC	DDB_G0267322	-	DDB_G0267322_RTE	ORF2 protein fragment of DIRS1 retrotransposon%3B refer to Genbank M11339 for full-length element	NA	NA	NA	NA	NA	NA
DDB0232428	128278	ACCGGCACAATGACGCGATC	38	GATCATTGCGCAAGGTCGAA	24	not_unique	GATC	NA	NA	NA	NA	DDB_G0267322	DDB_G0267324	-	+	192	292
DDB0232428	128669	AATGAAATCAATGGAGGATC	24	GATCAAATCAACAACCTTTC	31	not_unique	GATC	DDB_G0267324	+	DDB_G0267324_RTE	ORF1 protein of DIRS1 retrotransposon%3B refer to Genbank M11339 for full-length element	NA	NA	NA	NA	NA	NA
DDB0232428	129265	TACTCTTACCAATTAAGATC	20	GATCAAGGATACACCAAAGA	19	not_unique	GATC	DDB_G0267324	+	DDB_G0267324_RTE	ORF1 protein of DIRS1 retrotransposon%3B refer to Genbank M11339 for full-length element	NA	NA	NA	NA	NA	NA
DDB0232428	129477	AGTGGGAGTAATGGCCGATC	21	GATCTAACAACTTCAATGGA	22	not_unique	GATC	DDB_G0267324	+	DDB_G0267324_RTE	ORF1 protein of DIRS1 retrotransposon%3B refer to Genbank M11339 for full-length element	NA	NA	NA	NA	NA	NA
DDB0232428	129495	TCTAACAACTTCAATGGATC	22	GATCACCAAGTAGTGTTGCA	5	not_unique	GATC	DDB_G0267324	+	DDB_G0267324_RTE	ORF1 protein of DIRS1 retrotransposon%3B refer to Genbank M11339 for full-length element	NA	NA	NA	NA	NA	NA
DDB0232428	129892	ACATCGTCCAGTTCTCGATC	6	GATCTAAAAAGGTTAAACAC	6	not_unique	GATC	NA	NA	NA	NA	DDB_G0267324	DDB_G0267326	+	+	315	42
DDB0232428	130030	CCTACACGTGTTAGTAGATC	4	GATCCACAATACAGAGACTT	11	not_unique	GATC	DDB_G0267326	+	DDB_G0267326_RTE	ORF2 protein fragment of DIRS1 retrotransposon%3B refer to Genbank M11339 for full-length element	NA	NA	NA	NA	NA	NA
DDB0232428	130198	CATCGCTTACTTGGACGATC	17	GATCTATTAATCGTAGGTTC	3	not_unique	GATC	DDB_G0267326	+	DDB_G0267326_RTE	ORF2 protein fragment of DIRS1 retrotransposon%3B refer to Genbank M11339 for full-length element	NA	NA	NA	NA	NA	NA
DDB0232428	130570	AGCCAACGGAGATTGGGATC	3	GATCAATCATTCCCCATTCC	15	not_unique	GATC	DDB_G0267326	+	DDB_G0267326_RTE	ORF2 protein fragment of DIRS1 retrotransposon%3B refer to Genbank M11339 for full-length element	NA	NA	NA	NA	NA	NA
DDB0232428	130930	GGGTGGTCAAATACAAGATC	9	GATCTCTCAGTTCTATTCGA	4	not_unique	GATC	DDB_G0267326	+	DDB_G0267326_RTE	ORF2 protein fragment of DIRS1 retrotransposon%3B refer to Genbank M11339 for full-length element	NA	NA	NA	NA	NA	NA
DDB0232428	131155	CGGTCAAATACAGATGGATC	23	GATCTGTTCGCATCTCACCT	19	not_unique	GATC	DDB_G0267326	+	DDB_G0267326_RTE	ORF2 protein fragment of DIRS1 retrotransposon%3B refer to Genbank M11339 for full-length element	NA	NA	NA	NA	NA	NA
DDB0232428	131334	AGGTTTCTATAATACTGATC	19	GATCTTCCCAATCTGGAGAT	23	not_unique	GATC	DDB_G0267326	+	DDB_G0267326_RTE	ORF2 protein fragment of DIRS1 retrotransposon%3B refer to Genbank M11339 for full-length element	NA	NA	NA	NA	NA	NA
DDB0232428	131351	ATCTTCCCAATCTGGAGATC	23	GATCAGCAACTTGGTATCCG	22	not_unique	GATC	DDB_G0267326	+	DDB_G0267326_RTE	ORF2 protein fragment of DIRS1 retrotransposon%3B refer to Genbank M11339 for full-length element	NA	NA	NA	NA	NA	NA
DDB0232428	131808	AACTGATATTGTTAATGATC	22	GATCCATTCATCACAAGAAT	11	not_unique	GATC	DDB_G0267326	+	DDB_G0267326_RTE	ORF2 protein fragment of DIRS1 retrotransposon%3B refer to Genbank M11339 for full-length element	NA	NA	NA	NA	NA	NA
DDB0232428	131995	ATGTTTGGTTTAGCAAGATC	21	GATCATCAGACTTGGTGAAG	21	not_unique	GATC	DDB_G0267326	+	DDB_G0267326_RTE	ORF2 protein fragment of DIRS1 retrotransposon%3B refer to Genbank M11339 for full-length element	NA	NA	NA	NA	NA	NA
DDB0232428	132763	TTCGACCTTGCGCAATGATC	24	GATCGCGTCATTGTGCCGGT	38	not_unique	GATC	NA	NA	NA	NA	DDB_G0267326	DDB_G0267328	+	-	272	177
DDB0232428	133080	ATTCTTGTAATGAATGGATC	11	GATCATTAACAATATCAGTT	22	not_unique	GATC	DDB_G0267328	-	DDB_G0267328_RTE	ORF2 protein fragment of DIRS1 retrotransposon%3B refer to Genbank M11339 for full-length element	NA	NA	NA	NA	NA	NA
DDB0232428	133537	CGGATACCAAGTTGCTGATC	22	GATCTCCAGATTGGGAAGAT	23	not_unique	GATC	DDB_G0267328	-	DDB_G0267328_RTE	ORF2 protein fragment of DIRS1 retrotransposon%3B refer to Genbank M11339 for full-length element	NA	NA	NA	NA	NA	NA
DDB0232428	133554	ATCTCCAGATTGGGAAGATC	23	GATCAGTATTATAGAAACCT	19	not_unique	GATC	DDB_G0267328	-	DDB_G0267328_RTE	ORF2 protein fragment of DIRS1 retrotransposon%3B refer to Genbank M11339 for full-length element	NA	NA	NA	NA	NA	NA
DDB0232428	133733	AGATGAGATGCGAACAGATC	1	GATCCATCTGTATTTGACCG	23	unique_one	GATC	DDB_G0267328	-	DDB_G0267328_RTE	ORF2 protein fragment of DIRS1 retrotransposon%3B refer to Genbank M11339 for full-length element	NA	NA	NA	NA	NA	NA
DDB0232428	133958	TCGAATAGAACTGAGAGATC	4	GATCCTGTATCTGACCACCC	4	not_unique	GATC	DDB_G0267328	-	DDB_G0267328_RTE	ORF2 protein fragment of DIRS1 retrotransposon%3B refer to Genbank M11339 for full-length element	NA	NA	NA	NA	NA	NA
DDB0232428	134318	GGAATGGGGAATGATTGATC	15	GATCCCAATCTCCATTGGCT	16	not_unique	GATC	DDB_G0267328	-	DDB_G0267328_RTE	ORF2 protein fragment of DIRS1 retrotransposon%3B refer to Genbank M11339 for full-length element	NA	NA	NA	NA	NA	NA
DDB0232428	134690	GAACCGACGATTAATAGATC	22	GATCGTCCAAGTAAGCGATG	17	not_unique	GATC	NA	NA	NA	NA	DDB_G0267328	DDB_G0267330	-	-	32	618
DDB0232428	135393	TGCAACATTACTTGGTGATC	17	GATCCATTGAAGTTGTTAGA	22	not_unique	GATC	DDB_G0267330	-	DDB_G0267330_RTE	ORF1 protein of DIRS1 retrotransposon%3B refer to Genbank M11339 for full-length element	NA	NA	NA	NA	NA	NA
DDB0232428	135411	TCCATTGAAGTTGTTAGATC	22	GATCGGCCATTACTCCCACT	21	not_unique	GATC	DDB_G0267330	-	DDB_G0267330_RTE	ORF1 protein of DIRS1 retrotransposon%3B refer to Genbank M11339 for full-length element	NA	NA	NA	NA	NA	NA
DDB0232428	135623	TCTTTGGTGTATCCTTGATC	19	GATCTTAATTGGTAAGAGTA	20	not_unique	GATC	DDB_G0267330	-	DDB_G0267330_RTE	ORF1 protein of DIRS1 retrotransposon%3B refer to Genbank M11339 for full-length element	NA	NA	NA	NA	NA	NA
DDB0232428	136216	GAAAGGTTGTTGATTTGATC	31	GATCCTCCATTGATTTCATT	24	not_unique	GATC	DDB_G0267330	-	DDB_G0267330_RTE	ORF1 protein of DIRS1 retrotransposon%3B refer to Genbank M11339 for full-length element	NA	NA	NA	NA	NA	NA
DDB0232428	136599	TTCGACCTTGCGCAATGATC	24	GATCGCGTCATTGTGCCGGT	38	not_unique	GATC	NA	NA	NA	NA	DDB_G0267330	DDB_G0267332	-	-	287	439
DDB0232428	136762	GATAATATAAAAGACTGATC	2	GATCAATACCCATCACTAAT	2	not_unique	GATC	NA	NA	NA	NA	DDB_G0267330	DDB_G0267332	-	-	450	276
DDB0232428	136799	TACCATTAGGGCAGGGGATC	2	GATCTCACGGATACTAGATT	2	not_unique	GATC	NA	NA	NA	NA	DDB_G0267330	DDB_G0267332	-	-	487	239
DDB0232428	136995	GCAACAAACAACCCTTGATC	2	GATCAAATTTTAATCTATTT	2	not_unique	GATC	NA	NA	NA	NA	DDB_G0267330	DDB_G0267332	-	-	683	43
DDB0232428	137909	ACCCACTAGATTATCAGATC	2	GATCCCGACTGGAAGTTTTG	2	not_unique	GATC	NA	NA	NA	NA	DDB_G0267332	DDB_G0267338	-	-	160	425
DDB0232428	138558	GAACCGACGATTAATAGATC	22	GATCGTCCAAGTAAGCGATT	3	not_unique	GATC	DDB_G0267338	-	DDB_G0267338_RTE	ORF3 protein fragment of DIRS1 retrotransposon%3B refer to Genbank M11339 for full-length element	NA	NA	NA	NA	NA	NA
DDB0232428	138726	AAGTCTCTGTATTGCGGATC	9	GATCTACTAAAACGTGGAGG	8	not_unique	GATC	DDB_G0267338	-	DDB_G0267338_RTE	ORF3 protein fragment of DIRS1 retrotransposon%3B refer to Genbank M11339 for full-length element	NA	NA	NA	NA	NA	NA
DDB0232428	139397	AATGAAATCAATGGAGGATC	24	GATCAAATCAACAACCTTTC	31	not_unique	GATC	DDB_G0267334	+	DDB_G0267334_RTE	ORF1 protein fragment of DIRS1 retrotransposon%3B refer to Genbank M11339 for full-length element	NA	NA	NA	NA	NA	NA
DDB0232428	140770	GGTTTTTAATAAAAAAGATC	36	GATCTAATTATAGATAAAAA	2	not_unique	GATC	NA	NA	NA	NA	DDB_G0267334	DDB_G0267336	+	-	1005	1257
DDB0232428	140851	AATCAAATGGTCGGGGGATC	2	GATCGAATCCCTTTTGGTAA	34	not_unique	GATC	NA	NA	NA	NA	DDB_G0267334	DDB_G0267336	+	-	1086	1176
DDB0232428	141641	GGTTTTTAATTAAAAAGATC	3	GATCCATTTTTAGATCAAAA	2	not_unique	GATC	NA	NA	NA	NA	DDB_G0267334	DDB_G0267336	+	-	1876	386
DDB0232428	141653	AAAAGATCCATTTTTAGATC	2	GATCAAAAAAATGGGGATAA	8	not_unique	GATC	NA	NA	NA	NA	DDB_G0267334	DDB_G0267336	+	-	1888	374
DDB0232428	141757	TGATAGAGGGTCGGGGGATC	29	GATCGAATCCCTTTTGGTAA	34	not_unique	GATC	NA	NA	NA	NA	DDB_G0267334	DDB_G0267336	+	-	1992	270
DDB0232428	142241	GTTAATCCTACAAGATGATC	7	GATCTAAATTCTGTTATATG	2	not_unique	GATC	DDB_G0267336	-	DDB_G0267336_TE	ORF1 encoding a protein of unknown function of the putative DNA transposon DDT-B%3B refer to AF298202 for full-length consensus element	NA	NA	NA	NA	NA	NA
DDB0232428	142469	CAATAATGTATAATCTGATC	2	GATCTACCTTGATGACTCAT	7	not_unique	GATC	DDB_G0267336	-	DDB_G0267336_TE	ORF1 encoding a protein of unknown function of the putative DNA transposon DDT-B%3B refer to AF298202 for full-length consensus element	NA	NA	NA	NA	NA	NA
DDB0232428	143980	AGATTCGTTAATGACTGATC	4	GATCGGAAAGTCAGCATCGC	2	not_unique	GATC	DDB_G0267336	-	DDB_G0267336_TE	ORF1 encoding a protein of unknown function of the putative DNA transposon DDT-B%3B refer to AF298202 for full-length consensus element	NA	NA	NA	NA	NA	NA
DDB0232428	144174	AGATGAAGACATCCCAGATC	2	GATCATGATACCCGTACATG	2	not_unique	GATC	DDB_G0267336	-	DDB_G0267336_TE	ORF1 encoding a protein of unknown function of the putative DNA transposon DDT-B%3B refer to AF298202 for full-length consensus element	NA	NA	NA	NA	NA	NA
DDB0232428	144287	CAAAAATCATTTTCTAGATC	2	GATCTGAAAAAACCCACTTA	2	not_unique	GATC	DDB_G0267336	-	DDB_G0267336_TE	ORF1 encoding a protein of unknown function of the putative DNA transposon DDT-B%3B refer to AF298202 for full-length consensus element	NA	NA	NA	NA	NA	NA
DDB0232428	144647	GCTATTAACTCGACTGGATC	2	GATCGATTAATATGTAAGCG	2	not_unique	GATC	DDB_G0267336	-	DDB_G0267336_TE	ORF1 encoding a protein of unknown function of the putative DNA transposon DDT-B%3B refer to AF298202 for full-length consensus element	NA	NA	NA	NA	NA	NA
DDB0232428	144787	AAATACGACCACGGAAGATC	2	GATCTTGGTTCGCAACGCGT	2	not_unique	GATC	DDB_G0267336	-	DDB_G0267336_TE	ORF1 encoding a protein of unknown function of the putative DNA transposon DDT-B%3B refer to AF298202 for full-length consensus element	NA	NA	NA	NA	NA	NA
DDB0232428	145543	AATAAAATCAATGGAGGATC	2	GATCAAATCAACAACCTTTC	31	not_unique	GATC	DDB_G0267342	+	DDB_G0267342_RTE	ORF2 protein fragment of DIRS1 retrotransposon%3B refer to Genbank M11339 for full-length element	NA	NA	NA	NA	NA	NA
DDB0232428	145861	CCTCCACGTTTTAGTAGATC	8	GATCCGCAATACAGAGACTT	9	not_unique	GATC	DDB_G0267342	+	DDB_G0267342_RTE	ORF2 protein fragment of DIRS1 retrotransposon%3B refer to Genbank M11339 for full-length element	NA	NA	NA	NA	NA	NA
DDB0232428	146029	CATCGCTTACTTGGACGATC	17	GATCTATTAATCGTCGGTTC	22	not_unique	GATC	DDB_G0267342	+	DDB_G0267342_RTE	ORF2 protein fragment of DIRS1 retrotransposon%3B refer to Genbank M11339 for full-length element	NA	NA	NA	NA	NA	NA
DDB0232428	146401	AGCCAATGGAGATTGGGATC	16	GATCAATCATTCCACATTCC	1	unique_one	GATC	DDB_G0267342	+	DDB_G0267342_RTE	ORF2 protein fragment of DIRS1 retrotransposon%3B refer to Genbank M11339 for full-length element	NA	NA	NA	NA	NA	NA
DDB0232428	146761	GGGTGGTCAGATACAGGATC	4	GATCTCTCAGTTCTGTTCGA	17	not_unique	GATC	DDB_G0267342	+	DDB_G0267342_RTE	ORF2 protein fragment of DIRS1 retrotransposon%3B refer to Genbank M11339 for full-length element	NA	NA	NA	NA	NA	NA
DDB0232428	146986	CGGTCAAATACAGATGGATC	23	GATCTGTTCGCATCTCACTT	2	not_unique	GATC	DDB_G0267342	+	DDB_G0267342_RTE	ORF2 protein fragment of DIRS1 retrotransposon%3B refer to Genbank M11339 for full-length element	NA	NA	NA	NA	NA	NA
DDB0232428	147165	AGGTTTCTATAATACTGATC	19	GATCTTCCCAATCTGGAGAT	23	not_unique	GATC	DDB_G0267342	+	DDB_G0267342_RTE	ORF2 protein fragment of DIRS1 retrotransposon%3B refer to Genbank M11339 for full-length element	NA	NA	NA	NA	NA	NA
DDB0232428	147182	ATCTTCCCAATCTGGAGATC	23	GATCAGCAACTTGGTATCCG	22	not_unique	GATC	DDB_G0267342	+	DDB_G0267342_RTE	ORF2 protein fragment of DIRS1 retrotransposon%3B refer to Genbank M11339 for full-length element	NA	NA	NA	NA	NA	NA
DDB0232428	147639	AACTGATATTGTTAATGATC	22	GATCCATTCATCACAAGAAT	11	not_unique	GATC	DDB_G0267342	+	DDB_G0267342_RTE	ORF2 protein fragment of DIRS1 retrotransposon%3B refer to Genbank M11339 for full-length element	NA	NA	NA	NA	NA	NA
DDB0232428	147826	ATGTTTGGTTTAGCAAGATC	21	GATCATCAGACTTGGTGAAG	21	not_unique	GATC	DDB_G0267342	+	DDB_G0267342_RTE	ORF2 protein fragment of DIRS1 retrotransposon%3B refer to Genbank M11339 for full-length element	NA	NA	NA	NA	NA	NA
DDB0232428	148594	TTCGACCTTGTGCAATGATC	5	GATCGCGTCATTGTGCCGGT	38	not_unique	GATC	NA	NA	NA	NA	DDB_G0267342	DDB_G0267344	+	+	272	720
DDB0232428	149197	ACAAACCTTATCCAGTGATC	1	GATCGGGGAACAAATTCGGG	1	unique	GATC	NA	NA	NA	NA	DDB_G0267342	DDB_G0267344	+	+	875	117
DDB0232428	149566	TGATACCGGTGGTTTGGATC	1	GATCGTCGAATGAATGCCCA	1	unique	GATC	DDB_G0267344	+	DDB_G0267344	NA	NA	NA	NA	NA	NA	NA
DDB0232428	149622	TGGATAAAGGTGTTCAGATC	1	GATCTATAACAAGTTCCTAT	1	unique	GATC	DDB_G0267344	+	DDB_G0267344	NA	NA	NA	NA	NA	NA	NA
DDB0232428	149660	GCTACTGGCGTGCTTAGATC	1	GATCTCTTTTGTTAAATGCA	1	unique	GATC	DDB_G0267344	+	DDB_G0267344	NA	NA	NA	NA	NA	NA	NA
DDB0232428	149702	CAGGTGTGCGTTTCAAGATC	1	GATCTCTGACAGTCATGAGG	1	unique	GATC	DDB_G0267344	+	DDB_G0267344	NA	NA	NA	NA	NA	NA	NA
DDB0232428	149877	GTCCAAAGCAAACCGTGATC	1	GATCATCATGTGAGCTGGGT	1	unique	GATC	DDB_G0267344	+	DDB_G0267344	NA	NA	NA	NA	NA	NA	NA
DDB0232428	149931	GCTGCTAGCGTTAACTGATC	1	GATCGCTTGTATTATGGGGC	1	unique	GATC	DDB_G0267344	+	DDB_G0267344	NA	NA	NA	NA	NA	NA	NA
DDB0232428	150042	GTTTGTGATAACTCGTGATC	1	GATCCAGTAATGATTGTACC	1	unique	GATC	DDB_G0267344	+	DDB_G0267344	NA	NA	NA	NA	NA	NA	NA
DDB0232428	150460	GGGGCCGCTTAAAGCAGATC	1	GATCGGCAAGATTTGCTAAT	1	unique	GATC	DDB_G0267344	+	DDB_G0267344	NA	NA	NA	NA	NA	NA	NA
DDB0232428	150492	TAATGAATGGAGAGCAGATC	1	GATCTGGTCGTTAGATCCTC	1	unique	GATC	DDB_G0267344	+	DDB_G0267344	NA	NA	NA	NA	NA	NA	NA
DDB0232428	150505	GCAGATCTGGTCGTTAGATC	1	GATCCTCAGTGTAATAATCC	1	unique	GATC	DDB_G0267344	+	DDB_G0267344	NA	NA	NA	NA	NA	NA	NA
DDB0232428	150711	ATCGTGACTACGATATGATC	1	GATCATTGTACAACTAATGG	1	unique	GATC	DDB_G0267344	+	DDB_G0267344	NA	NA	NA	NA	NA	NA	NA
DDB0232428	150736	ACAACTAATGGGCACTGATC	1	GATCTGACCGGTGGGTTCAT	1	unique	GATC	DDB_G0267344	+	DDB_G0267344	NA	NA	NA	NA	NA	NA	NA
DDB0232428	151079	CCGACCATAACTCCAGGATC	1	GATCTTTGTTCGTCCTGTTA	1	unique	GATC	DDB_G0267344	+	DDB_G0267344	NA	NA	NA	NA	NA	NA	NA
DDB0232428	151162	CTGCTACTGAGGCCATGATC	1	GATCTTTACCAAGAAACCAT	1	unique	GATC	NA	NA	NA	NA	DDB_G0267344	DDB_G0267346	+	+	2	124
DDB0232428	151468	GTAAGTTGGCTATGTCGATC	1	GATCCCGTATTTCAACGTAC	1	unique	GATC	DDB_G0267346	+	DDB_G0267346	NA	NA	NA	NA	NA	NA	NA
DDB0232428	151604	TACTTCTTCTACGGTGGATC	1	GATCCGTTTATCATTCATCG	1	unique	GATC	DDB_G0267346	+	DDB_G0267346	NA	NA	NA	NA	NA	NA	NA
DDB0232428	151728	CGTAGGGATTGTGCTTGATC	1	GATCAGTTCTTAGAGTTACT	1	unique	GATC	DDB_G0267346	+	DDB_G0267346	NA	NA	NA	NA	NA	NA	NA
DDB0232428	151827	TGACCCAAGCAAGTTGGATC	1	GATCATTGCTTACCGCGCGC	1	unique	GATC	DDB_G0267346	+	DDB_G0267346	NA	NA	NA	NA	NA	NA	NA
DDB0232428	152056	ACAATTAACGGTCATCGATC	4	GATCAATGTTGAATCAGTTG	1	unique_one	GATC	DDB_G0267346	+	DDB_G0267346	NA	NA	NA	NA	NA	NA	NA
DDB0232428	152256	GTCGTCCAAGGACGGAGATC	1	GATCTTTTGTCAAGGTACCA	1	unique	GATC	DDB_G0267346	+	DDB_G0267346	NA	NA	NA	NA	NA	NA	NA
DDB0232428	152276	TTTTGTCAAGGTACCAGATC	1	GATCGTGTATTCGGCTCAGC	1	unique	GATC	DDB_G0267346	+	DDB_G0267346	NA	NA	NA	NA	NA	NA	NA
DDB0232428	152463	GTACCAGTTAGAGAAAGATC	1	GATCCTTCTGGTATCACGAC	1	unique	GATC	DDB_G0267346	+	DDB_G0267346	NA	NA	NA	NA	NA	NA	NA
DDB0232428	152954	GGTTTTTAATAAAAAAGATC	36	GATCTAGTTTTAGAACAAAA	1	unique_one	GATC	NA	NA	NA	NA	DDB_G0267346	DDB_G0267348	+	-	66	575
DDB0232428	153071	TGATAGAGGGTCGGGGGATC	29	GATCGAATCCCTTTTGGTAA	34	not_unique	GATC	NA	NA	NA	NA	DDB_G0267346	DDB_G0267348	+	-	183	458
DDB0232428	154071	AAATAAAAAATTGAGTGATC	15	GATCATAATTTTTATTTATA	14	not_unique	GATC	DDB_G0267348	-	DDB_G0267348_TE	ORF1 encoding a protein of unknown function of the putative DNA transposon DDT-A%3B refer to AF298201 for full-length consensus element	NA	NA	NA	NA	NA	NA
DDB0232428	154381	TTTTTTGCTCCATTTTGATC	1	GATCTATTATATTTTCATCA	1	unique	GATC	DDB_G0267350	-	DDB_G0267350_TE	ORF1 encoding a protein of unknown function of the putative DNA transposon DDT-A%3B refer to AF298201 for full-length consensus element	NA	NA	NA	NA	NA	NA
DDB0232428	155162	TTACCAAAAGGGATTCGATC	34	GATCCCCCGACCCTCTATTA	3	not_unique	GATC	NA	NA	NA	NA	DDB_G0267350	DDB_G0267352	-	+	352	3421
DDB0232428	155278	TTTTTGTCTAAAATTAGATC	1	GATCTTTTTTTATTAAAAAC	1	unique	GATC	NA	NA	NA	NA	DDB_G0267350	DDB_G0267352	-	+	468	3305
DDB0232428	156378	TACCCAAAAGGGATTCGATC	7	GATCCCCCGACCCTCTATCA	29	not_unique	GATC	NA	NA	NA	NA	DDB_G0267350	DDB_G0267352	-	+	1568	2205
DDB0232428	156495	TTTTGTGCTAAAATTAGATC	7	GATCTTTTTTATTAAAAACC	36	not_unique	GATC	NA	NA	NA	NA	DDB_G0267350	DDB_G0267352	-	+	1685	2088
DDB0232428	157845	GGTTTTTAATAAAAAAGATC	36	GATCTAATTTTAGAACAAAA	21	not_unique	GATC	NA	NA	NA	NA	DDB_G0267350	DDB_G0267352	-	+	3035	738
DDB0232428	157963	GATAGAGGGTCGGGGGGATC	2	GATCGAATCCCTTTTGGTAA	34	not_unique	GATC	NA	NA	NA	NA	DDB_G0267350	DDB_G0267352	-	+	3153	620
DDB0232428	158093	TGATAGAGGGTCGGGGGATC	29	GATCGAATCCCTTTTGGTAA	34	not_unique	GATC	NA	NA	NA	NA	DDB_G0267350	DDB_G0267352	-	+	3283	490
DDB0232428	158781	AAAATATCCAACAAATGATC	11	GATCCAGATGACCCATGTAA	11	not_unique	GATC	DDB_G0267352	+	DDB_G0267352_TE	ORF1 encoding a protein of unknown function of the putative DNA transposon DDT-A%3B refer to AF298201 for full-length consensus element	NA	NA	NA	NA	NA	NA
DDB0232428	159267	TATAAATAAAAATTATGATC	14	GATCACTCAATTTTTTATTT	15	not_unique	GATC	DDB_G0267352	+	DDB_G0267352_TE	ORF1 encoding a protein of unknown function of the putative DNA transposon DDT-A%3B refer to AF298201 for full-length consensus element	NA	NA	NA	NA	NA	NA
DDB0232428	160162	AAAGGAAGAGAGAATAGATC	10	GATCAATATTATATTACCTT	10	not_unique	GATC	DDB_G0267352	+	DDB_G0267352_TE	ORF1 encoding a protein of unknown function of the putative DNA transposon DDT-A%3B refer to AF298201 for full-length consensus element	NA	NA	NA	NA	NA	NA
DDB0232428	162975	TGTAACTTTTCTTCCTGATC	10	GATCTAGTTGTTTTAATTTG	8	not_unique	GATC	DDB_G0267356	-	DDB_G0267356_RTE	long terminal repeat retrotransposon Skipper GAG-PRO-POL%3B refer to GenBank AF049230 for full length consensus element	NA	NA	NA	NA	NA	NA
DDB0232428	163003	TTAATTTGTAAACTAAGATC	11	GATCAAGTTCATCATCCTCA	1	unique_one	GATC	DDB_G0267356	-	DDB_G0267356_RTE	long terminal repeat retrotransposon Skipper GAG-PRO-POL%3B refer to GenBank AF049230 for full length consensus element	NA	NA	NA	NA	NA	NA
DDB0232428	163277	CTGTATCGACTTCTTTGATC	7	GATCCATTCAGGTTCTGGGT	8	not_unique	GATC	DDB_G0267356	-	DDB_G0267356_RTE	long terminal repeat retrotransposon Skipper GAG-PRO-POL%3B refer to GenBank AF049230 for full length consensus element	NA	NA	NA	NA	NA	NA
DDB0232428	163447	TATAGTTTTACGATTTGATC	7	GATCCTTGTTGAACACATTG	4	not_unique	GATC	DDB_G0267356	-	DDB_G0267356_RTE	long terminal repeat retrotransposon Skipper GAG-PRO-POL%3B refer to GenBank AF049230 for full length consensus element	NA	NA	NA	NA	NA	NA
DDB0232428	163570	AGTTTGTGAGAGATTAGATC	8	GATCTTTTGAAAGATTAGTT	4	not_unique	GATC	DDB_G0267356	-	DDB_G0267356_RTE	long terminal repeat retrotransposon Skipper GAG-PRO-POL%3B refer to GenBank AF049230 for full length consensus element	NA	NA	NA	NA	NA	NA
DDB0232428	164035	TCTGAAAGGAATCTTGGATC	8	GATCTCTATCGGAGACGATT	10	not_unique	GATC	DDB_G0267356	-	DDB_G0267356_RTE	long terminal repeat retrotransposon Skipper GAG-PRO-POL%3B refer to GenBank AF049230 for full length consensus element	NA	NA	NA	NA	NA	NA
DDB0232428	164185	ACAATGACACAAACTTGATC	9	GATCGACTTCAACTGTAAAT	9	not_unique	GATC	DDB_G0267356	-	DDB_G0267356_RTE	long terminal repeat retrotransposon Skipper GAG-PRO-POL%3B refer to GenBank AF049230 for full length consensus element	NA	NA	NA	NA	NA	NA
DDB0232428	164803	TATGTAAGATTTTGGTGATC	9	GATCAGTGTAGATTGAAACC	10	not_unique	GATC	DDB_G0267356	-	DDB_G0267356_RTE	long terminal repeat retrotransposon Skipper GAG-PRO-POL%3B refer to GenBank AF049230 for full length consensus element	NA	NA	NA	NA	NA	NA
DDB0232428	165526	TTTGAATGAACCAAAAGATC	10	GATCATCAAAGTATTGTAAT	10	not_unique	GATC	DDB_G0267356	-	DDB_G0267356_RTE	long terminal repeat retrotransposon Skipper GAG-PRO-POL%3B refer to GenBank AF049230 for full length consensus element	NA	NA	NA	NA	NA	NA
DDB0232428	165784	ACCGGAGTGAATGGATGATC	10	GATCGTCTCTAACAGTGACT	9	not_unique	GATC	DDB_G0267356	-	DDB_G0267356_RTE	long terminal repeat retrotransposon Skipper GAG-PRO-POL%3B refer to GenBank AF049230 for full length consensus element	NA	NA	NA	NA	NA	NA
DDB0232428	165888	TGAGTAATTTGATTCTGATC	10	GATCTTTTGATAATACCTAA	10	not_unique	GATC	DDB_G0267356	-	DDB_G0267356_RTE	long terminal repeat retrotransposon Skipper GAG-PRO-POL%3B refer to GenBank AF049230 for full length consensus element	NA	NA	NA	NA	NA	NA
DDB0232428	165949	TCGACATGTCTCTTATGATC	9	GATCATCTGTTGAATAATAG	5	not_unique	GATC	DDB_G0267356	-	DDB_G0267356_RTE	long terminal repeat retrotransposon Skipper GAG-PRO-POL%3B refer to GenBank AF049230 for full length consensus element	NA	NA	NA	NA	NA	NA
DDB0232428	165997	GTTGGTTCAACATCTTGATC	9	GATCTTTCTTTAATATGATA	2	not_unique	GATC	DDB_G0267356	-	DDB_G0267356_RTE	long terminal repeat retrotransposon Skipper GAG-PRO-POL%3B refer to GenBank AF049230 for full length consensus element	NA	NA	NA	NA	NA	NA
DDB0232428	166054	CTGGAATTGTTAATCTGATC	9	GATCTGGAATATCAGGAAGT	8	not_unique	GATC	DDB_G0267356	-	DDB_G0267356_RTE	long terminal repeat retrotransposon Skipper GAG-PRO-POL%3B refer to GenBank AF049230 for full length consensus element	NA	NA	NA	NA	NA	NA
DDB0232428	167278	GCTTTGGCATCGACCGGATC	7	GATCAATTCTACATGTAGAT	8	not_unique	GATC	DDB_G0267358	-	DDB_G0267358_RTE	ORF1 encoding GAG and protease (PRO) proteins of long terminal repeat retrotransposon Skipper%3B refer to AF049230 for consensus element	NA	NA	NA	NA	NA	NA
DDB0232428	167703	ATTATTATCTAAAATTGATC	10	GATCTTAGATACTCTAATTG	8	not_unique	GATC	DDB_G0267358	-	DDB_G0267358_RTE	ORF1 encoding GAG and protease (PRO) proteins of long terminal repeat retrotransposon Skipper%3B refer to AF049230 for consensus element	NA	NA	NA	NA	NA	NA
DDB0232428	167898	TGGAACCAAAGTCTTGGATC	6	GATCTAAAGTTACGGTGGAT	5	not_unique	GATC	DDB_G0267358	-	DDB_G0267358_RTE	ORF1 encoding GAG and protease (PRO) proteins of long terminal repeat retrotransposon Skipper%3B refer to AF049230 for consensus element	NA	NA	NA	NA	NA	NA
DDB0232428	169582	TGTAACTTTTCTTCCTGATC	10	GATCTAGTTGTTTTAATTTG	8	not_unique	GATC	DDB_G0267362	-	DDB_G0267362_RTE	long terminal repeat retrotransposon Skipper GAG-PRO-POL%3B refer to GenBank AF049230 for full length consensus element	NA	NA	NA	NA	NA	NA
DDB0232428	169610	TTAATTTGTAAACTAAGATC	11	GATCAAGTTCATCATCATCA	10	not_unique	GATC	DDB_G0267362	-	DDB_G0267362_RTE	long terminal repeat retrotransposon Skipper GAG-PRO-POL%3B refer to GenBank AF049230 for full length consensus element	NA	NA	NA	NA	NA	NA
DDB0232428	169884	CTGTATCGACTTCTTTGATC	7	GATCCATTCAGGTTCTGGGT	8	not_unique	GATC	DDB_G0267362	-	DDB_G0267362_RTE	long terminal repeat retrotransposon Skipper GAG-PRO-POL%3B refer to GenBank AF049230 for full length consensus element	NA	NA	NA	NA	NA	NA
DDB0232428	170054	TATAGTTTTACGATTTGATC	7	GATCTTTGTTGAACACATTG	3	not_unique	GATC	DDB_G0267362	-	DDB_G0267362_RTE	long terminal repeat retrotransposon Skipper GAG-PRO-POL%3B refer to GenBank AF049230 for full length consensus element	NA	NA	NA	NA	NA	NA
DDB0232428	170177	AGTTTGTGAGAGATTAGATC	8	GATCTTTTGAAAGATTAGTT	4	not_unique	GATC	DDB_G0267362	-	DDB_G0267362_RTE	long terminal repeat retrotransposon Skipper GAG-PRO-POL%3B refer to GenBank AF049230 for full length consensus element	NA	NA	NA	NA	NA	NA
DDB0232428	170642	TCTGAAAGGAATCTTGGATC	8	GATCTCTATCGGAGACGATT	10	not_unique	GATC	DDB_G0267362	-	DDB_G0267362_RTE	long terminal repeat retrotransposon Skipper GAG-PRO-POL%3B refer to GenBank AF049230 for full length consensus element	NA	NA	NA	NA	NA	NA
DDB0232428	170792	ACAATGACACAAACTTGATC	9	GATCGACTTCAACTGTAAAT	9	not_unique	GATC	DDB_G0267362	-	DDB_G0267362_RTE	long terminal repeat retrotransposon Skipper GAG-PRO-POL%3B refer to GenBank AF049230 for full length consensus element	NA	NA	NA	NA	NA	NA
DDB0232428	171410	TATGTAAGATTTTGGTGATC	9	GATCAGTGTAGATTGAAACC	10	not_unique	GATC	DDB_G0267362	-	DDB_G0267362_RTE	long terminal repeat retrotransposon Skipper GAG-PRO-POL%3B refer to GenBank AF049230 for full length consensus element	NA	NA	NA	NA	NA	NA
DDB0232428	172133	TTTGAATGAACCAAAAGATC	10	GATCATCAAAGTATTGTAAT	10	not_unique	GATC	DDB_G0267362	-	DDB_G0267362_RTE	long terminal repeat retrotransposon Skipper GAG-PRO-POL%3B refer to GenBank AF049230 for full length consensus element	NA	NA	NA	NA	NA	NA
DDB0232428	172391	ACCGGAGTGAATGGATGATC	10	GATCGTCTCTAACAGTGACT	9	not_unique	GATC	DDB_G0267362	-	DDB_G0267362_RTE	long terminal repeat retrotransposon Skipper GAG-PRO-POL%3B refer to GenBank AF049230 for full length consensus element	NA	NA	NA	NA	NA	NA
DDB0232428	172495	TGAGTAATTTGATTCTGATC	10	GATCTTTTGATAATACCTAA	10	not_unique	GATC	DDB_G0267362	-	DDB_G0267362_RTE	long terminal repeat retrotransposon Skipper GAG-PRO-POL%3B refer to GenBank AF049230 for full length consensus element	NA	NA	NA	NA	NA	NA
DDB0232428	172556	TCGACATGTCTCTTATGATC	9	GATCATCTGTTGAATAATAG	5	not_unique	GATC	DDB_G0267362	-	DDB_G0267362_RTE	long terminal repeat retrotransposon Skipper GAG-PRO-POL%3B refer to GenBank AF049230 for full length consensus element	NA	NA	NA	NA	NA	NA
DDB0232428	172604	GTTGGTTCAACATCTTGATC	9	GATCTTTCTTTATTATGATA	4	not_unique	GATC	DDB_G0267362	-	DDB_G0267362_RTE	long terminal repeat retrotransposon Skipper GAG-PRO-POL%3B refer to GenBank AF049230 for full length consensus element	NA	NA	NA	NA	NA	NA
DDB0232428	172661	CTGGAATTGTTAATCTGATC	9	GATCTGGAATATCAGGAAGT	8	not_unique	GATC	DDB_G0267362	-	DDB_G0267362_RTE	long terminal repeat retrotransposon Skipper GAG-PRO-POL%3B refer to GenBank AF049230 for full length consensus element	NA	NA	NA	NA	NA	NA
DDB0232428	173885	GCTTTGGCATCGACCGGATC	7	GATCAATTCTACATGTAGAT	8	not_unique	GATC	DDB_G0267364	-	DDB_G0267364_RTE	ORF1 encoding GAG and protease (PRO) proteins of long terminal repeat retrotransposon Skipper%3B refer to AF049230 for consensus element	NA	NA	NA	NA	NA	NA
DDB0232428	174310	ATTATTATCTAAAATTGATC	10	GATCTTAGATACTCTAATTG	8	not_unique	GATC	NA	NA	NA	NA	DDB_G0267364	DDB_G0305708	-	-	38	432
DDB0232428	174787	TCTTTGGTGTATCCTTGATC	19	GATCTTAATTGGTAAGAGTA	20	not_unique	GATC	DDB_G0305708	-	DDB_G0305708_RTE	ORF1 protein fragment of DIRS1 retrotransposon%3B refer to Genbank M11339 for full-length element	NA	NA	NA	NA	NA	NA
DDB0232428	175378	GAAAGGTTGTTGATTTGATC	31	GATCCTCCATTGATTTCATT	24	not_unique	GATC	DDB_G0305708	-	DDB_G0305708_RTE	ORF1 protein fragment of DIRS1 retrotransposon%3B refer to Genbank M11339 for full-length element	NA	NA	NA	NA	NA	NA
DDB0232428	175763	TTCGACCTTGCGCAATGATC	24	GATCGCGTCATTGTGCCGGT	38	not_unique	GATC	NA	NA	NA	NA	DDB_G0305708	DDB_G0305706	-	+	370	8845
DDB0232428	175926	GATAATATAAAAGACTGATC	2	GATCAATACCCATCACTAAT	2	not_unique	GATC	NA	NA	NA	NA	DDB_G0305708	DDB_G0305706	-	+	533	8682
DDB0232428	175963	TACCATTAGGGCAGGGGATC	2	GATCTCACGGATACTAGATT	2	not_unique	GATC	NA	NA	NA	NA	DDB_G0305708	DDB_G0305706	-	+	570	8645
DDB0232428	176159	GCAACAAACAACCCTTGATC	2	GATCAAATTTTAATCTATTT	2	not_unique	GATC	NA	NA	NA	NA	DDB_G0305708	DDB_G0305706	-	+	766	8449
DDB0232428	177073	ACCCACTAGATTATCAGATC	2	GATCCCGACTGGAAGTTTTG	2	not_unique	GATC	NA	NA	NA	NA	DDB_G0305708	DDB_G0305706	-	+	1680	7535
DDB0232428	177722	GAACCGACGATTAATAGATC	22	GATCGTCCAAGTAAGCGATT	3	not_unique	GATC	NA	NA	NA	NA	DDB_G0305708	DDB_G0305706	-	+	2329	6886
DDB0232428	177890	AAGTCTCTGTATTGCGGATC	9	GATCTACTAAAACGTGGAGG	8	not_unique	GATC	NA	NA	NA	NA	DDB_G0305708	DDB_G0305706	-	+	2497	6718
DDB0232428	178561	AATGAAATCAATGGAGGATC	24	GATCAAATCAACAACCTTTC	31	not_unique	GATC	NA	NA	NA	NA	DDB_G0305708	DDB_G0305706	-	+	3168	6047
DDB0232428	179934	GGTTTTTAATAAAAAAGATC	36	GATCTAATTATAGATAAAAA	2	not_unique	GATC	NA	NA	NA	NA	DDB_G0305708	DDB_G0305706	-	+	4541	4674
DDB0232428	180015	AATCAAATGGTCGGGGGATC	2	GATCGAATCCCTTTTGGTAA	34	not_unique	GATC	NA	NA	NA	NA	DDB_G0305708	DDB_G0305706	-	+	4622	4593
DDB0232428	180805	GGTTTTTAATTAAAAAGATC	3	GATCCATTTTTAGATCAAAA	2	not_unique	GATC	NA	NA	NA	NA	DDB_G0305708	DDB_G0305706	-	+	5412	3803
DDB0232428	180817	AAAAGATCCATTTTTAGATC	2	GATCAAAAAAATGGGGATAA	8	not_unique	GATC	NA	NA	NA	NA	DDB_G0305708	DDB_G0305706	-	+	5424	3791
DDB0232428	180921	TGATAGAGGGTCGGGGGATC	29	GATCGAATCCCTTTTGGTAA	34	not_unique	GATC	NA	NA	NA	NA	DDB_G0305708	DDB_G0305706	-	+	5528	3687
DDB0232428	181405	GTTAATCCTACAAGATGATC	7	GATCTAAATTCTGTTATATG	2	not_unique	GATC	NA	NA	NA	NA	DDB_G0305708	DDB_G0305706	-	+	6012	3203
DDB0232428	181633	CAATAATGTATAATCTGATC	2	GATCTACCTTGATGACTCAT	7	not_unique	GATC	NA	NA	NA	NA	DDB_G0305708	DDB_G0305706	-	+	6240	2975
DDB0232428	183144	AGATTCGTTAATGACTGATC	4	GATCGGAAAGTCAGCATCGC	2	not_unique	GATC	NA	NA	NA	NA	DDB_G0305708	DDB_G0305706	-	+	7751	1464
DDB0232428	183338	AGATGAAGACATCCCAGATC	2	GATCATGATACCCGTACATG	2	not_unique	GATC	NA	NA	NA	NA	DDB_G0305708	DDB_G0305706	-	+	7945	1270
DDB0232428	183451	CAAAAATCATTTTCTAGATC	2	GATCTGAAAAAACCCACTTA	2	not_unique	GATC	NA	NA	NA	NA	DDB_G0305708	DDB_G0305706	-	+	8058	1157
DDB0232428	183811	GCTATTAACTCGACTGGATC	2	GATCGATTAATATGTAAGCG	2	not_unique	GATC	NA	NA	NA	NA	DDB_G0305708	DDB_G0305706	-	+	8418	797
DDB0232428	183951	AAATACGACCACGGAAGATC	2	GATCTTGGTTCGCAACGCGT	2	not_unique	GATC	NA	NA	NA	NA	DDB_G0305708	DDB_G0305706	-	+	8558	657
DDB0232428	184707	AATAAAATCAATGGAGGATC	2	GATCAAATCAACAACCTTTC	31	not_unique	GATC	DDB_G0305706	+	DDB_G0305706_RTE	ORF1 protein fragment of DIRS1 retrotransposon%3B refer to Genbank M11339 for full-length element	NA	NA	NA	NA	NA	NA
DDB0232428	185025	CCTCCACGTTTTAGTAGATC	8	GATCCGCAATACAGAGACTT	9	not_unique	GATC	DDB_G0305706	+	DDB_G0305706_RTE	ORF1 protein fragment of DIRS1 retrotransposon%3B refer to Genbank M11339 for full-length element	NA	NA	NA	NA	NA	NA
DDB0232428	185193	CATCGCTTACTTGGACGATC	17	GATCTATTAATCGTCGGTTC	22	not_unique	GATC	DDB_G0305706	+	DDB_G0305706_RTE	ORF1 protein fragment of DIRS1 retrotransposon%3B refer to Genbank M11339 for full-length element	NA	NA	NA	NA	NA	NA
DDB0232428	185565	AGCCAATGGAGATTGGGATC	16	GATCAATCATTCCCCATTCC	15	not_unique	GATC	DDB_G0305706	+	DDB_G0305706_RTE	ORF1 protein fragment of DIRS1 retrotransposon%3B refer to Genbank M11339 for full-length element	NA	NA	NA	NA	NA	NA
DDB0232428	185925	GGGTGGTCAGATACAGGATC	4	GATCTCTCAGTTCTGTTCGA	17	not_unique	GATC	DDB_G0305706	+	DDB_G0305706_RTE	ORF1 protein fragment of DIRS1 retrotransposon%3B refer to Genbank M11339 for full-length element	NA	NA	NA	NA	NA	NA
DDB0232428	186150	CGGTCAAATACAGATGGATC	23	GATCTGTTCGCATCTCACTT	2	not_unique	GATC	DDB_G0305706	+	DDB_G0305706_RTE	ORF1 protein fragment of DIRS1 retrotransposon%3B refer to Genbank M11339 for full-length element	NA	NA	NA	NA	NA	NA
DDB0232428	186329	AGGTTTCTATAATACTGATC	19	GATCTTCCCAATCTGGAGAT	23	not_unique	GATC	DDB_G0305706	+	DDB_G0305706_RTE	ORF1 protein fragment of DIRS1 retrotransposon%3B refer to Genbank M11339 for full-length element	NA	NA	NA	NA	NA	NA
DDB0232428	186346	ATCTTCCCAATCTGGAGATC	23	GATCAGCAACTTGGTATCCG	22	not_unique	GATC	DDB_G0305706	+	DDB_G0305706_RTE	ORF1 protein fragment of DIRS1 retrotransposon%3B refer to Genbank M11339 for full-length element	NA	NA	NA	NA	NA	NA
DDB0232428	186800	TATGTAAGATTTTGGTGATC	9	GATCAGTGTAGATTGAAACC	10	not_unique	GATC	NA	NA	NA	NA	DDB_G0305706	DDB_G0267366	+	-	346	196
DDB0232428	187523	TTTGAATGAACCAAAAGATC	10	GATCATCAAAGTATTGTAAT	10	not_unique	GATC	DDB_G0267366	-	DDB_G0267366_RTE	long terminal repeat retrotransposon Skipper GAG-PRO-POL%3B refer to GenBank AF049230 for full length consensus element	NA	NA	NA	NA	NA	NA
DDB0232428	187781	ACCGGAGTGAATGGATGATC	10	GATCGTCTCTAACAGTGACT	9	not_unique	GATC	DDB_G0267366	-	DDB_G0267366_RTE	long terminal repeat retrotransposon Skipper GAG-PRO-POL%3B refer to GenBank AF049230 for full length consensus element	NA	NA	NA	NA	NA	NA
DDB0232428	187885	TGAGTAATTTGATTCTGATC	10	GATCTTTTGATAATACCTAA	10	not_unique	GATC	DDB_G0267366	-	DDB_G0267366_RTE	long terminal repeat retrotransposon Skipper GAG-PRO-POL%3B refer to GenBank AF049230 for full length consensus element	NA	NA	NA	NA	NA	NA
DDB0232428	187946	TCGACATGTCTCTTATGATC	9	GATCATCTGTTGAATAATAG	5	not_unique	GATC	DDB_G0267366	-	DDB_G0267366_RTE	long terminal repeat retrotransposon Skipper GAG-PRO-POL%3B refer to GenBank AF049230 for full length consensus element	NA	NA	NA	NA	NA	NA
DDB0232428	187994	GTTGGTTCAACATCTTGATC	9	GATCTTTCTTTAATATGATA	2	not_unique	GATC	DDB_G0267366	-	DDB_G0267366_RTE	long terminal repeat retrotransposon Skipper GAG-PRO-POL%3B refer to GenBank AF049230 for full length consensus element	NA	NA	NA	NA	NA	NA
DDB0232428	188051	CTGGAATTGTTAATCTGATC	9	GATCTGGAATATCAGGAAGT	8	not_unique	GATC	DDB_G0267366	-	DDB_G0267366_RTE	long terminal repeat retrotransposon Skipper GAG-PRO-POL%3B refer to GenBank AF049230 for full length consensus element	NA	NA	NA	NA	NA	NA
DDB0232428	189275	GCTTTGGCATCGACCGGATC	7	GATCAATTCTACATGTAGAT	8	not_unique	GATC	DDB_G0267366	-	DDB_G0267366_RTE	long terminal repeat retrotransposon Skipper GAG-PRO-POL%3B refer to GenBank AF049230 for full length consensus element	NA	NA	NA	NA	NA	NA
DDB0232428	189700	ATTATTATCTAAAATTGATC	10	GATCTTAGATACTCTAATTG	8	not_unique	GATC	DDB_G0267366	-	DDB_G0267366_RTE	long terminal repeat retrotransposon Skipper GAG-PRO-POL%3B refer to GenBank AF049230 for full length consensus element	NA	NA	NA	NA	NA	NA
DDB0232428	189895	TGGAACCAAAGTCTTGGATC	6	GATCTAAAGTTACGGTGTAT	3	not_unique	GATC	DDB_G0267366	-	DDB_G0267366_RTE	long terminal repeat retrotransposon Skipper GAG-PRO-POL%3B refer to GenBank AF049230 for full length consensus element	NA	NA	NA	NA	NA	NA
DDB0232428	193037	TTACCAAAAGGGATTCGATC	34	GATCCCCTGACCCTCTATTA	1	unique_one	GATC	NA	NA	NA	NA	DDB_G0267370	DDB_G0267372	-	+	413	479
DDB0232428	193144	TCCCCATTTTTTTGGAGATC	1	GATCGAAAAAAACAAACAAC	98	unique_one	GATC	NA	NA	NA	NA	DDB_G0267370	DDB_G0267372	-	+	520	372
DDB0232428	193343	AAGCAAAAAATAATCAGATC	122	GATCGAAAAAAACAAACAAC	98	not_unique	GATC	NA	NA	NA	NA	DDB_G0267370	DDB_G0267372	-	+	719	173
DDB0232428	194023	CAACAAAGGATGGAGAGATC	53	GATCAAACCTCATTACCAGA	53	not_unique	GATC	DDB_G0267372	+	DDB_G0267372_RTE	ORF1 of tRNA-specific non-long terminal repeat retrotransposon TRE5-A%3B formerly known as DRE	NA	NA	NA	NA	NA	NA
DDB0232428	194259	CAAGAATAGAGAATGAGATC	54	GATCAATACACAATCGATAA	40	not_unique	GATC	DDB_G0268474	+	DDB_G0268474_RTE	ORF1 of tRNA-specific non-long terminal repeat retrotransposon TRE5-A%3B formerly known as DRE	NA	NA	NA	NA	NA	NA
DDB0232428	194782	CAACGAACAAAGTAAAGATC	37	GATCAGTTAGAAGACAAAAT	54	not_unique	GATC	DDB_G0268474	+	DDB_G0268474_RTE	ORF1 of tRNA-specific non-long terminal repeat retrotransposon TRE5-A%3B formerly known as DRE	NA	NA	NA	NA	NA	NA
DDB0232428	194893	GTTTGGAACATCCAAGGATC	6	GATCCAACACCATCCAATCT	49	not_unique	GATC	NA	NA	NA	NA	DDB_G0268474	DDB_G0268476	+	-	43	1066
DDB0232428	195472	AAAATAAATAAAATGAGATC	4	GATCTAGCATCTCAAGGAGA	121	not_unique	GATC	NA	NA	NA	NA	DDB_G0268474	DDB_G0268476	+	-	622	487
DDB0232428	195557	TTTTGTTCTAAAATTAGATC	21	GATCTTTTTTATTAAAAACC	36	not_unique	GATC	NA	NA	NA	NA	DDB_G0268474	DDB_G0268476	+	-	707	402
DDB0232428	196225	AAATAAAAAATTGAGTGATC	15	GATCATAATTTTTATTTATA	14	not_unique	GATC	DDB_G0268476	-	DDB_G0268476_TE	ORF1 encoding a protein of unknown function of the putative DNA transposon DDT-A%3B refer to AF298201 for full-length consensus element	NA	NA	NA	NA	NA	NA
DDB0232428	196711	TTACATGGGTCATCTGGATC	11	GATCATTTGTTGGATATTTT	11	not_unique	GATC	DDB_G0268476	-	DDB_G0268476_TE	ORF1 encoding a protein of unknown function of the putative DNA transposon DDT-A%3B refer to AF298201 for full-length consensus element	NA	NA	NA	NA	NA	NA
DDB0232428	198771	TAAGATAACAAACTTTGATC	1	GATCTGAACTGTTATTGTTA	1	unique	GATC	DDB_G0268260	-	DDB_G0268260	NA	NA	NA	NA	NA	NA	NA
DDB0232428	199155	TATGAATTTTTGAACGGATC	1	GATCTTAAGGTGTCAGTAGC	1	unique	GATC	DDB_G0268260	-	DDB_G0268260	NA	NA	NA	NA	NA	NA	NA
DDB0232428	199996	TTTTTTTTTAGACACAGATC	1	GATCTACTAAGAAAATAATA	1	unique	GATC	DDB_G0268260	-	DDB_G0268260	NA	NA	NA	NA	NA	NA	NA
DDB0232428	200271	ATAAATCGTACAGTTTGATC	1	GATCTAAATTTGCTAAAGAG	1	unique	GATC	DDB_G0268260	-	DDB_G0268260	NA	NA	NA	NA	NA	NA	NA
DDB0232428	200415	AAACTTAAATTACAAAGATC	1	GATCACAGTTAAATGGTAAA	1	unique	GATC	DDB_G0268260	-	DDB_G0268260	NA	NA	NA	NA	NA	NA	NA
DDB0232428	200481	CAATGCACCCCTATGTGATC	1	GATCTAATTGATATGTTTCT	1	unique	GATC	DDB_G0268260	-	DDB_G0268260	NA	NA	NA	NA	NA	NA	NA
DDB0232428	201856	TGAAAACATTTGTTTTGATC	1	GATCGTTCTATACAAATGCC	1	unique	GATC	DDB_G0267458	+	DDB_G0267458	NA	NA	NA	NA	NA	NA	NA
DDB0232428	202478	AACCGAGTTTGACAATGATC	1	GATCACCCAATGGTAAAGTC	1	unique	GATC	DDB_G0267458	+	DDB_G0267458	NA	NA	NA	NA	NA	NA	NA
DDB0232428	202529	TACTTTTAAGAGTTTGGATC	1	GATCAATTTATAAAATATTT	1	unique	GATC	DDB_G0267458	+	DDB_G0267458	NA	NA	NA	NA	NA	NA	NA
DDB0232428	203000	AATAATTAACTTTTTCGATC	1	GATCTCAATGGAAGAACGTA	1	unique	GATC	DDB_G0267458	+	DDB_G0267458	NA	NA	NA	NA	NA	NA	NA
DDB0232428	203202	GTTCCAGCAAAGTTAAGATC	1	GATCAAATACTTTAGTTTAT	1	unique	GATC	DDB_G0267458	+	DDB_G0267458	NA	NA	NA	NA	NA	NA	NA
DDB0232428	203532	TGAGTTCTAGATTGAAGATC	1	GATCTTGAATGGTTTGTTTA	1	unique	GATC	DDB_G0267480	-	nup93	similar to the mammalian nucleoporin complex component Nup93 to and to S. cerevisiae NIC96 that are required for correct nuclear pore assembly	NA	NA	NA	NA	NA	NA
DDB0232428	203910	CCAAATTGATATAATTGATC	1	GATCTCTTTCACTTGAAATT	1	unique	GATC	DDB_G0267480	-	nup93	similar to the mammalian nucleoporin complex component Nup93 to and to S. cerevisiae NIC96 that are required for correct nuclear pore assembly	NA	NA	NA	NA	NA	NA
DDB0232428	204394	ATTGATTTGGAAGTTTGATC	1	GATCGTAAATTTCTTTTTGT	1	unique	GATC	DDB_G0267480	-	nup93	similar to the mammalian nucleoporin complex component Nup93 to and to S. cerevisiae NIC96 that are required for correct nuclear pore assembly	NA	NA	NA	NA	NA	NA
DDB0232428	204833	AATCTTGAATAGATGTGATC	1	GATCACTTGTTGTTTTGTTG	1	unique	GATC	DDB_G0267480	-	nup93	similar to the mammalian nucleoporin complex component Nup93 to and to S. cerevisiae NIC96 that are required for correct nuclear pore assembly	NA	NA	NA	NA	NA	NA
DDB0232428	204859	TGTTTTGTTGAGTTTGGATC	1	GATCATTACAAGATAAAAGA	1	unique	GATC	DDB_G0267480	-	nup93	similar to the mammalian nucleoporin complex component Nup93 to and to S. cerevisiae NIC96 that are required for correct nuclear pore assembly	NA	NA	NA	NA	NA	NA
DDB0232428	204890	AAAGATTAAATACAGAGATC	1	GATCTTAAACACATCTTTAC	1	unique	GATC	DDB_G0267480	-	nup93	similar to the mammalian nucleoporin complex component Nup93 to and to S. cerevisiae NIC96 that are required for correct nuclear pore assembly	NA	NA	NA	NA	NA	NA
DDB0232428	205104	AATATCGAAATAACGAGATC	1	GATCCACATTTTTCCAATGC	1	unique	GATC	DDB_G0267480	-	nup93	similar to the mammalian nucleoporin complex component Nup93 to and to S. cerevisiae NIC96 that are required for correct nuclear pore assembly	NA	NA	NA	NA	NA	NA
DDB0232428	205344	CTCTAAAAATGAAATAGATC	1	GATCTCTTTAATAATTGGGC	1	unique	GATC	DDB_G0267480	-	nup93	similar to the mammalian nucleoporin complex component Nup93 to and to S. cerevisiae NIC96 that are required for correct nuclear pore assembly	NA	NA	NA	NA	NA	NA
DDB0232428	205660	CCATAAGATTTTGATTGATC	1	GATCTGCCATGTGAATATCA	1	unique	GATC	DDB_G0267480	-	nup93	similar to the mammalian nucleoporin complex component Nup93 to and to S. cerevisiae NIC96 that are required for correct nuclear pore assembly	NA	NA	NA	NA	NA	NA
DDB0232428	206224	TTTGCTAAAACTTTTGGATC	1	GATCTAATCCATATTTTCTA	1	unique	GATC	DDB_G0267480	-	nup93	similar to the mammalian nucleoporin complex component Nup93 to and to S. cerevisiae NIC96 that are required for correct nuclear pore assembly	NA	NA	NA	NA	NA	NA
DDB0232428	208747	AAAAATTAATGTAGAAGATC	1	GATCCTTACTATGGTGATAT	1	unique	GATC	DDB_G0267484	+	acp1	conserved low molecular weight phosphotyrosine protein phosphatase%2C acts on tyrosine phosphorylated proteins%2C low-MW aryl phosphates and natural and synthetic acyl phosphates	NA	NA	NA	NA	NA	NA
DDB0232428	209394	TGTAACTTTGGTTTTTGATC	1	GATCCATCTTTATTTATAAA	1	unique	GATC	DDB_G0267486	-	DDB_G0267486	contains a 2Fe-2S ferredoxin-type iron-sulfur binding domain	NA	NA	NA	NA	NA	NA
DDB0232428	210998	TTATAATACAAATGAAGATC	1	GATCATGCTCCGTTATCAAA	1	unique	GATC	DDB_G0267488	+	DDB_G0267488	NA	NA	NA	NA	NA	NA	NA
DDB0232428	211740	AATTCATCATCTAAAAGATC	1	GATCACCAGATTATAAAAGC	1	unique	GATC	DDB_G0267488	+	DDB_G0267488	NA	NA	NA	NA	NA	NA	NA
DDB0232428	212082	CCATTTATGGCTCCAAGATC	1	GATCATTTGGTAATGATGTA	1	unique	GATC	DDB_G0267488	+	DDB_G0267488	NA	NA	NA	NA	NA	NA	NA
DDB0232428	212746	AAAAACTCTTTTACCAGATC	1	GATCTTGGATCCACTGTCAT	1	unique	GATC	DDB_G0267490	-	ChLim	contains a N-terminal Calponin Homology (CH) domain%2C 3 LIM domains%2C and 4 LIM-related domains (LRDs)	NA	NA	NA	NA	NA	NA
DDB0232428	212753	CTTTTACCAGATCTTGGATC	1	GATCCACTGTCATACCATAA	1	unique	GATC	DDB_G0267490	-	ChLim	contains a N-terminal Calponin Homology (CH) domain%2C 3 LIM domains%2C and 4 LIM-related domains (LRDs)	NA	NA	NA	NA	NA	NA
DDB0232428	213026	CTACATTTGGCACAATGATC	1	GATCAGTTGTTGTTGATTGT	1	unique	GATC	DDB_G0267490	-	ChLim	contains a N-terminal Calponin Homology (CH) domain%2C 3 LIM domains%2C and 4 LIM-related domains (LRDs)	NA	NA	NA	NA	NA	NA
DDB0232428	213218	ACACATACAACACAACGATC	1	GATCACTATCAAGCCATCCA	1	unique	GATC	DDB_G0267490	-	ChLim	contains a N-terminal Calponin Homology (CH) domain%2C 3 LIM domains%2C and 4 LIM-related domains (LRDs)	NA	NA	NA	NA	NA	NA
DDB0232428	213539	GGTGATTTTTTGATTTGATC	1	GATCATTTTGATTTAAATTC	1	unique	GATC	DDB_G0267490	-	ChLim	contains a N-terminal Calponin Homology (CH) domain%2C 3 LIM domains%2C and 4 LIM-related domains (LRDs)	NA	NA	NA	NA	NA	NA
DDB0232428	213833	TGATTATGATGGTGATGATC	1	GATCATGACCATCTTTATCC	1	unique	GATC	DDB_G0267490	-	ChLim	contains a N-terminal Calponin Homology (CH) domain%2C 3 LIM domains%2C and 4 LIM-related domains (LRDs)	NA	NA	NA	NA	NA	NA
DDB0232428	214247	TAGAATTTCTTTTTTGGATC	1	GATCCAATTTACAACTACAA	1	unique	GATC	DDB_G0267490	-	ChLim	contains a N-terminal Calponin Homology (CH) domain%2C 3 LIM domains%2C and 4 LIM-related domains (LRDs)	NA	NA	NA	NA	NA	NA
DDB0232428	214449	AATATAGTGTAATTGCGATC	1	GATCTATTTTCATTTTTTTT	1	unique	GATC	DDB_G0267490	-	ChLim	contains a N-terminal Calponin Homology (CH) domain%2C 3 LIM domains%2C and 4 LIM-related domains (LRDs)	NA	NA	NA	NA	NA	NA
DDB0232428	215496	TTATTATTATTTTTTGGATC	1	GATCATCAATAGGTATAAAA	1	unique	GATC	DDB_G0267492	-	DDB_G0267492	putative metalloprotease of the peptidase M41 family%2C which belong to a larger family of zinc metalloproteases%3B includes the cell division protein FtsH	NA	NA	NA	NA	NA	NA
DDB0232428	216004	CAACATCCATTTGAGCGATC	1	GATCAATTGTTTCTTTGTAA	1	unique	GATC	DDB_G0267492	-	DDB_G0267492	putative metalloprotease of the peptidase M41 family%2C which belong to a larger family of zinc metalloproteases%3B includes the cell division protein FtsH	NA	NA	NA	NA	NA	NA
DDB0232428	216309	TTGACAAGATTAAAAAGATC	1	GATCGGCACCACTAAAACCT	1	unique	GATC	DDB_G0267492	-	DDB_G0267492	putative metalloprotease of the peptidase M41 family%2C which belong to a larger family of zinc metalloproteases%3B includes the cell division protein FtsH	NA	NA	NA	NA	NA	NA
DDB0232428	216393	TTATCCTTGAGGTAATGATC	1	GATCAATGATTGATTTTCTT	1	unique	GATC	DDB_G0267492	-	DDB_G0267492	putative metalloprotease of the peptidase M41 family%2C which belong to a larger family of zinc metalloproteases%3B includes the cell division protein FtsH	NA	NA	NA	NA	NA	NA
DDB0232428	216447	GGTACTTGAATGATACGATC	1	GATCGAATCTACCTGAACGA	1	unique	GATC	DDB_G0267492	-	DDB_G0267492	putative metalloprotease of the peptidase M41 family%2C which belong to a larger family of zinc metalloproteases%3B includes the cell division protein FtsH	NA	NA	NA	NA	NA	NA
DDB0232428	217134	TTATTATTATTTAATTGATC	5	GATCTTGATTATTTAATTTA	1	unique_one	GATC	DDB_G0267492	-	DDB_G0267492	putative metalloprotease of the peptidase M41 family%2C which belong to a larger family of zinc metalloproteases%3B includes the cell division protein FtsH	NA	NA	NA	NA	NA	NA
DDB0232428	217769	AAAAACCATTGCAATGGATC	1	GATCTAAATAAAAAAGAAAA	1	unique	GATC	DDB_G0267494	+	DDB_G0267494	NA	NA	NA	NA	NA	NA	NA
DDB0232428	217990	AATACTTAAAATCAATGATC	1	GATCTCAACTGTTTTTGAAA	1	unique	GATC	DDB_G0267494	+	DDB_G0267494	NA	NA	NA	NA	NA	NA	NA
DDB0232428	218111	CTTTAATGAAAATGATGATC	1	GATCATGATGATCCAAACAA	1	unique	GATC	DDB_G0267494	+	DDB_G0267494	NA	NA	NA	NA	NA	NA	NA
DDB0232428	218120	AAATGATGATCATGATGATC	1	GATCCAAACAAAAAAAGAAA	1	unique	GATC	DDB_G0267494	+	DDB_G0267494	NA	NA	NA	NA	NA	NA	NA
DDB0232428	218219	TGATGATAACGACGATGATC	1	GATCATGACCATAATAATAA	1	unique	GATC	DDB_G0267494	+	DDB_G0267494	NA	NA	NA	NA	NA	NA	NA
DDB0232428	218488	TATTTAAATTGCGGAAGATC	1	GATCAAGATTTGAATTATCA	1	unique	GATC	NA	NA	NA	NA	DDB_G0267494	DDB_G0267496	+	+	123	425
DDB0232428	219246	TTTAATTAAAATGTGTGATC	1	GATCCTTATTTGGATGATTT	1	unique	GATC	DDB_G0267496	+	DDB_G0267496	NA	NA	NA	NA	NA	NA	NA
DDB0232428	220352	GGAATATAACACAAAAGATC	1	GATCTATGAAATAATATTGA	1	unique	GATC	DDB_G0267496	+	DDB_G0267496	NA	NA	NA	NA	NA	NA	NA
DDB0232428	220441	GCAATGGTTGGTTCTAGATC	1	GATCAGAGTTTTTCATTGGT	1	unique	GATC	DDB_G0267496	+	DDB_G0267496	NA	NA	NA	NA	NA	NA	NA
DDB0232428	220832	CTATCGTCTTTAAGATGATC	1	GATCTATCGTTTACATTGTG	1	unique	GATC	DDB_G0267496	+	DDB_G0267496	NA	NA	NA	NA	NA	NA	NA
DDB0232428	220878	GCAAATTCGTTACTATGATC	1	GATCGTACACTTTGGTCAAC	1	unique	GATC	DDB_G0267496	+	DDB_G0267496	NA	NA	NA	NA	NA	NA	NA
DDB0232428	221111	ACACTACATTTCCTTCGATC	1	GATCCTCTTACAAATGCTCA	1	unique	GATC	DDB_G0267496	+	DDB_G0267496	NA	NA	NA	NA	NA	NA	NA
DDB0232428	221268	TGCATCAACTGGTATCGATC	1	GATCAAACCACTTGGAAAAA	1	unique	GATC	DDB_G0267496	+	DDB_G0267496	NA	NA	NA	NA	NA	NA	NA
DDB0232428	221538	TCCAACCTTAAATCAAGATC	1	GATCTATCCAATTTCTTAAT	1	unique	GATC	DDB_G0267496	+	DDB_G0267496	NA	NA	NA	NA	NA	NA	NA
DDB0232428	221571	AATAACTCACAAAGGTGATC	1	GATCTTTCAAATTGTATTAG	1	unique	GATC	DDB_G0267496	+	DDB_G0267496	NA	NA	NA	NA	NA	NA	NA
DDB0232428	221721	GTTAACCTCAATTGAGGATC	1	GATCAATTGCTAACAGAGGT	1	unique	GATC	DDB_G0267496	+	DDB_G0267496	NA	NA	NA	NA	NA	NA	NA
DDB0232428	221916	AGTATTCTATACTCAAGATC	1	GATCATGTTATCACTTATGC	1	unique	GATC	DDB_G0267496	+	DDB_G0267496	NA	NA	NA	NA	NA	NA	NA
DDB0232428	222546	ATTCCATACCTTCAAAGATC	1	GATCATTCAATATGGGAACT	1	unique	GATC	DDB_G0267496	+	DDB_G0267496	NA	NA	NA	NA	NA	NA	NA
DDB0232428	222612	TCAATCTTTTTAAGAAGATC	1	GATCTCCAAAATATTTGAAT	1	unique	GATC	DDB_G0267496	+	DDB_G0267496	NA	NA	NA	NA	NA	NA	NA
DDB0232428	223241	ATTAATTAGTTCAGGTGATC	1	GATCATTCTTTCAATCAAAG	1	unique	GATC	DDB_G0267496	+	DDB_G0267496	NA	NA	NA	NA	NA	NA	NA
DDB0232428	223362	TATCAAGAAAATGAAAGATC	1	GATCAAATAAATCATTTGAA	1	unique	GATC	DDB_G0267496	+	DDB_G0267496	NA	NA	NA	NA	NA	NA	NA
DDB0232428	223440	AGCTTTATTTCACGTAGATC	1	GATCCTCAACTCATTGGTCA	1	unique	GATC	DDB_G0267496	+	DDB_G0267496	NA	NA	NA	NA	NA	NA	NA
DDB0232428	224023	CCGATTGCACATTATTGATC	1	GATCGAATCCGATTGGAGTA	1	unique	GATC	DDB_G0267496	+	DDB_G0267496	NA	NA	NA	NA	NA	NA	NA
DDB0232428	224467	AATTCAATGGTGTTATGATC	1	GATCCTTTTGTACAAAACTA	1	unique	GATC	DDB_G0267496	+	DDB_G0267496	NA	NA	NA	NA	NA	NA	NA
DDB0232428	224545	GTATGACCGAAGAGATGATC	1	GATCGATATTCTCTGTAGTG	1	unique	GATC	DDB_G0267496	+	DDB_G0267496	NA	NA	NA	NA	NA	NA	NA
DDB0232428	224675	TGAAAAGAAAAAAGGTGATC	1	GATCAATCACCTTCGATTTG	1	unique	GATC	DDB_G0267496	+	DDB_G0267496	NA	NA	NA	NA	NA	NA	NA
DDB0232428	224744	AACAATGTCACCAGATGATC	1	GATCCAAATACAAAAGATTT	1	unique	GATC	DDB_G0267496	+	DDB_G0267496	NA	NA	NA	NA	NA	NA	NA
DDB0232428	225140	TACCCAACTCATGATTGATC	1	GATCTTTCGCAACGTTCAAC	1	unique	GATC	DDB_G0267496	+	DDB_G0267496	NA	NA	NA	NA	NA	NA	NA
DDB0232428	225314	TTTTGGTTTACACACTGATC	1	GATCAAGATATCATTAACAA	1	unique	GATC	DDB_G0267496	+	DDB_G0267496	NA	NA	NA	NA	NA	NA	NA
DDB0232428	225671	ACCACAAATCCCCTCTGATC	1	GATCCAATCTCCCTTAAAAG	1	unique	GATC	DDB_G0267496	+	DDB_G0267496	NA	NA	NA	NA	NA	NA	NA
DDB0232428	227339	ATCTTTCATCTGATTCGATC	1	GATCATGTCATGAGAAGGTT	1	unique	GATC	DDB_G0267500	-	DDB_G0267500	NA	NA	NA	NA	NA	NA	NA
DDB0232428	227380	GCATATGCTAATAAATGATC	1	GATCCTCAGCTGAATCTGAT	1	unique	GATC	DDB_G0267500	-	DDB_G0267500	NA	NA	NA	NA	NA	NA	NA
DDB0232428	227578	GAATAGATTAAAGCTGGATC	1	GATCCAATTGTAATGCTATT	1	unique	GATC	DDB_G0267500	-	DDB_G0267500	NA	NA	NA	NA	NA	NA	NA
DDB0232428	228075	TACTAATGGGTAAGCTGATC	1	GATCTATGTAACATATGAAT	1	unique	GATC	DDB_G0267500	-	DDB_G0267500	NA	NA	NA	NA	NA	NA	NA
DDB0232428	228922	AAAACTGATTATAATTGATC	1	GATCAAAACTTATACTAAGG	1	unique	GATC	NA	NA	NA	NA	DDB_G0267500	DDB_G0267450	-	-	579	223
DDB0232428	229059	AAATAAGATTTTATAAGATC	1	GATCGAAAATAATGATTTTT	1	unique	GATC	NA	NA	NA	NA	DDB_G0267500	DDB_G0267450	-	-	716	86
DDB0232428	229228	AAAGGATGTTTTAAAAGATC	1	GATCGGTAGCATCAGGACGA	1	unique	GATC	DDB_G0267450	-	pakC	STE20%2FPAK protein kinase required for normal chemotaxis%3B contains PAK-box%2FP21-Rho-binding (CRIB) domain and pleckstrin homology (PH) domain	NA	NA	NA	NA	NA	NA
DDB0232428	229984	TTATAAATTTTAGTTGGATC	1	GATCTTCTTTTGTTACTAAA	1	unique	GATC	DDB_G0267450	-	pakC	STE20%2FPAK protein kinase required for normal chemotaxis%3B contains PAK-box%2FP21-Rho-binding (CRIB) domain and pleckstrin homology (PH) domain	NA	NA	NA	NA	NA	NA
DDB0232428	230433	TACTGTGCTATATTCTGATC	1	GATCCTTTCTCAACTGCTTT	1	unique	GATC	DDB_G0267450	-	pakC	STE20%2FPAK protein kinase required for normal chemotaxis%3B contains PAK-box%2FP21-Rho-binding (CRIB) domain and pleckstrin homology (PH) domain	NA	NA	NA	NA	NA	NA
DDB0232428	231441	CTTGAAGATACACCTGGATC	1	GATCTTGAGTTGGGGTGTAT	1	unique	GATC	DDB_G0268264	-	DDB_G0268264	similar to Entamoeba histolytica 20 kDa antigen	NA	NA	NA	NA	NA	NA
DDB0232428	232914	AATTTAAAATTTTGAAGATC	1	GATCTGGCACATATGGACCA	1	unique	GATC	NA	NA	NA	NA	DDB_G0268264	DDB_G0268266	-	+	870	886
DDB0232428	233554	TCACTCTATTATAATTGATC	1	GATCTTTTGTTGAAAAAAAA	1	unique	GATC	NA	NA	NA	NA	DDB_G0268264	DDB_G0268266	-	+	1510	246
DDB0232428	234140	AATAATAATTATAACGGATC	1	GATCTAATAACATGAATGGT	1	unique	GATC	DDB_G0268266	+	DDB_G0268266	similar to D. purpureum protein	NA	NA	NA	NA	NA	NA
DDB0232428	234482	TCCTCTTTCTTTAAATGATC	1	GATCAACCATTTTTACTTTA	1	unique	GATC	DDB_G0268266	+	DDB_G0268266	similar to D. purpureum protein	NA	NA	NA	NA	NA	NA
DDB0232428	235186	ACAACACTGGATGGTAGATC	1	GATCCATTGATATCCATTTT	1	unique	GATC	DDB_G0268266	+	DDB_G0268266	similar to D. purpureum protein	NA	NA	NA	NA	NA	NA
DDB0232428	235344	TACAGAGTTTAATCGTGATC	1	GATCAAGTGTGAGTAATCAA	1	unique	GATC	DDB_G0268266	+	DDB_G0268266	similar to D. purpureum protein	NA	NA	NA	NA	NA	NA
DDB0232428	237384	TTATCATCTTTAATTGGATC	1	GATCCTATTTTTTAAAAAGT	1	unique	GATC	DDB_G0267502	-	DDB_G0267502	NA	NA	NA	NA	NA	NA	NA
DDB0232428	237564	CCATAGTCCACTAAAAGATC	1	GATCACTTCCACAATAGTGA	1	unique	GATC	DDB_G0267502	-	DDB_G0267502	NA	NA	NA	NA	NA	NA	NA
DDB0232428	237585	CTTCCACAATAGTGATGATC	1	GATCATAGCTTACAAATATT	1	unique	GATC	DDB_G0267502	-	DDB_G0267502	NA	NA	NA	NA	NA	NA	NA
DDB0232428	237670	ACTCTTCATTGTAATCGATC	1	GATCTCAGCTGATGGTTGAT	1	unique	GATC	DDB_G0267502	-	DDB_G0267502	NA	NA	NA	NA	NA	NA	NA
DDB0232428	237771	GAGCCTACACTATCTGGATC	1	GATCGGTGACATAAATTTTA	1	unique	GATC	DDB_G0267502	-	DDB_G0267502	NA	NA	NA	NA	NA	NA	NA
DDB0232428	237825	TGTGCCCACCTAAATTGATC	1	GATCCCAACCGATGATGGTT	1	unique	GATC	DDB_G0267502	-	DDB_G0267502	NA	NA	NA	NA	NA	NA	NA
DDB0232428	237868	CTTGACACATTTCCAAGATC	1	GATCACATTATCTTTGAATA	1	unique	GATC	DDB_G0267502	-	DDB_G0267502	NA	NA	NA	NA	NA	NA	NA
DDB0232428	237903	AGGGTTTGTGATAATTGATC	1	GATCGTAGAGTTTGGTTGCT	1	unique	GATC	DDB_G0267502	-	DDB_G0267502	NA	NA	NA	NA	NA	NA	NA
DDB0232428	238370	ATTCAATCTATTAATTGATC	1	GATCTTTTTCGATATTCATT	1	unique	GATC	DDB_G0267502	-	DDB_G0267502	NA	NA	NA	NA	NA	NA	NA
DDB0232428	239835	CAATGGTAATCCAAAGGATC	1	GATCATCCAGATTATGATAA	1	unique	GATC	DDB_G0268614	+	msh6	NA	NA	NA	NA	NA	NA	NA
DDB0232428	240033	TCACTTGAAACTTACTGATC	1	GATCGTGTCAATATGCGTAT	1	unique	GATC	DDB_G0268614	+	msh6	NA	NA	NA	NA	NA	NA	NA
DDB0232428	240129	TAAAGTGGCCAAGGTAGATC	1	GATCAAATGGAGACATCAAT	1	unique	GATC	DDB_G0268614	+	msh6	NA	NA	NA	NA	NA	NA	NA
DDB0232428	240260	TTTTGGATGAACAAATGATC	1	GATCACCGATCAAACTTCAA	1	unique	GATC	DDB_G0268614	+	msh6	NA	NA	NA	NA	NA	NA	NA
DDB0232428	240267	TGAACAAATGATCACCGATC	1	GATCAAACTTCAACCTATCT	1	unique	GATC	DDB_G0268614	+	msh6	NA	NA	NA	NA	NA	NA	NA
DDB0232428	240834	TCTTTTCAAGTTGATGGATC	1	GATCGTTGTACCACTGCCTT	1	unique	GATC	DDB_G0268614	+	msh6	NA	NA	NA	NA	NA	NA	NA
DDB0232428	240915	TAAGAATGCAATTGTTGATC	1	GATCGTCAAAAGGCAATCGA	1	unique	GATC	DDB_G0268614	+	msh6	NA	NA	NA	NA	NA	NA	NA
DDB0232428	240996	CCTCAACAAACTACCTGATC	1	GATCTCGAAAGAATGATCGC	1	unique	GATC	DDB_G0268614	+	msh6	NA	NA	NA	NA	NA	NA	NA
DDB0232428	241010	CTGATCTCGAAAGAATGATC	1	GATCGCAAGAATTCGTGCTC	1	unique	GATC	DDB_G0268614	+	msh6	NA	NA	NA	NA	NA	NA	NA
DDB0232428	241047	AACTTCAAAAATCTCTGATC	1	GATCTCATTTCAGTTTTAAA	1	unique	GATC	DDB_G0268614	+	msh6	NA	NA	NA	NA	NA	NA	NA
DDB0232428	241290	TTTTACCATTGAACAAGATC	1	GATCGTGTGGTACCATCAAA	1	unique	GATC	DDB_G0268614	+	msh6	NA	NA	NA	NA	NA	NA	NA
DDB0232428	241329	TTTGTTTTTAGAGTTTGATC	1	GATCAATGTTTAGGCAATAT	1	unique	GATC	DDB_G0268614	+	msh6	NA	NA	NA	NA	NA	NA	NA
DDB0232428	241442	AACATATGGGTAAAGAGATC	1	GATCTATCAAATAGAGATAC	1	unique	GATC	DDB_G0268614	+	msh6	NA	NA	NA	NA	NA	NA	NA
DDB0232428	241761	CCTATTCGTCTCTAGTGATC	1	GATCAACGTGGTTTCATTGA	1	unique	GATC	DDB_G0268614	+	msh6	NA	NA	NA	NA	NA	NA	NA
DDB0232428	242182	AAGTATGCAACCAAACGATC	1	GATCATTGGTTATTTTGGAT	1	unique	GATC	DDB_G0268614	+	msh6	NA	NA	NA	NA	NA	NA	NA
DDB0232428	242340	TGAACCAACAGTTCGTGATC	1	GATCTCATTTCCACAGCATA	1	unique	GATC	DDB_G0268614	+	msh6	NA	NA	NA	NA	NA	NA	NA
DDB0232428	242720	AAAAAAAAATCAAGTAGATC	1	GATCAAATGTTTTTTTTTTT	3	unique_one	GATC	NA	NA	NA	NA	DDB_G0268614	DDB_G0267468	+	+	57	333
DDB0232428	242746	TTTTTTTTTTAATCTAGATC	3	GATCGATTTTTAATATGTTC	1	unique_one	GATC	NA	NA	NA	NA	DDB_G0268614	DDB_G0267468	+	+	83	307
DDB0232428	243093	GTAATTGAGGAAAATAGATC	1	GATCAAAACCATTGATCAAT	1	unique	GATC	DDB_G0267468	+	adprt4	catalyzes ADP-ribosylation%2C a posttranslational protein modification in which the ADP-ribose moiety of NAD is transferred onto specific amino acid side chains of cell surface%2C secreted%2C cytosolic or nuclear proteins	NA	NA	NA	NA	NA	NA
DDB0232428	243106	ATAGATCAAAACCATTGATC	1	GATCAATTTAACCTTTTTTA	1	unique	GATC	DDB_G0267468	+	adprt4	catalyzes ADP-ribosylation%2C a posttranslational protein modification in which the ADP-ribose moiety of NAD is transferred onto specific amino acid side chains of cell surface%2C secreted%2C cytosolic or nuclear proteins	NA	NA	NA	NA	NA	NA
DDB0232428	243293	TTTTTTAAGTAATCAAGATC	1	GATCTCTCAAAAATAAAATT	1	unique	GATC	DDB_G0267468	+	adprt4	catalyzes ADP-ribosylation%2C a posttranslational protein modification in which the ADP-ribose moiety of NAD is transferred onto specific amino acid side chains of cell surface%2C secreted%2C cytosolic or nuclear proteins	NA	NA	NA	NA	NA	NA
DDB0232428	243464	GGAAAAAGCTGATGATGATC	1	GATCTATTGAAAATTATCAT	1	unique	GATC	DDB_G0267468	+	adprt4	catalyzes ADP-ribosylation%2C a posttranslational protein modification in which the ADP-ribose moiety of NAD is transferred onto specific amino acid side chains of cell surface%2C secreted%2C cytosolic or nuclear proteins	NA	NA	NA	NA	NA	NA
DDB0232428	244053	CAATCTTTGTTTCAAAGATC	1	GATCCTACATTGAAACCAAT	1	unique	GATC	DDB_G0267468	+	adprt4	catalyzes ADP-ribosylation%2C a posttranslational protein modification in which the ADP-ribose moiety of NAD is transferred onto specific amino acid side chains of cell surface%2C secreted%2C cytosolic or nuclear proteins	NA	NA	NA	NA	NA	NA
DDB0232428	245670	ATAGCTTTATAGGGACGATC	1	GATCATAATCTGGATTCCAA	1	unique	GATC	DDB_G0267504	-	DDB_G0267504	NA	NA	NA	NA	NA	NA	NA
DDB0232428	246397	TCAATACAATTAATATGATC	1	GATCACTGCAAATGCAATCA	1	unique	GATC	DDB_G0267504	-	DDB_G0267504	NA	NA	NA	NA	NA	NA	NA
DDB0232428	247514	AAAATTAAAATATATTGATC	1	GATCAAAAATTAATTAAAAT	1	unique	GATC	NA	NA	NA	NA	DDB_G0267504	DDB_G0267506	-	+	285	1380
DDB0232428	248912	AATGTTTAAATTAAGTGATC	3	GATCCTTTTGATTATGAAAA	5	not_unique	GATC	DDB_G0267506	+	aslH	similar to acetyl-CoA synthetase%2C which condenses acetate and CoA to acetyl-coA	NA	NA	NA	NA	NA	NA
DDB0232428	249944	CATATGGGTTTAATTGGATC	1	GATCATTAGCACTTGGAAAT	1	unique	GATC	DDB_G0267506	+	aslH	similar to acetyl-CoA synthetase%2C which condenses acetate and CoA to acetyl-coA	NA	NA	NA	NA	NA	NA
DDB0232428	250096	ATACCTTATAAAGAATGATC	2	GATCCGGGAGCTACTAATAT	1	unique_one	GATC	DDB_G0267506	+	aslH	similar to acetyl-CoA synthetase%2C which condenses acetate and CoA to acetyl-coA	NA	NA	NA	NA	NA	NA
DDB0232428	250546	TGTTTCAAGGGCAGATGATC	1	GATCAAATTAAAATTGGTGG	4	unique_one	GATC	DDB_G0267506	+	aslH	similar to acetyl-CoA synthetase%2C which condenses acetate and CoA to acetyl-coA	NA	NA	NA	NA	NA	NA
DDB0232428	250940	AGTGGTAAAATTCCAAGATC	1	GATCGATAGTTTCAAAGTTT	1	unique	GATC	DDB_G0267506	+	aslH	similar to acetyl-CoA synthetase%2C which condenses acetate and CoA to acetyl-coA	NA	NA	NA	NA	NA	NA
DDB0232428	250996	ATTACATGAATCATGTGATC	1	GATCATGAAGTTTTTTACTT	1	unique	GATC	DDB_G0267506	+	aslH	similar to acetyl-CoA synthetase%2C which condenses acetate and CoA to acetyl-coA	NA	NA	NA	NA	NA	NA
DDB0232428	251405	AAACAAGAGGAATTAAGATC	1	GATCAAAATAATAATATTAA	1	unique	GATC	NA	NA	NA	NA	DDB_G0267506	DDB_G0268268	+	-	362	132
DDB0232428	252076	CTCCTCATATGATTACGATC	1	GATCACCAATGTACTCTACA	1	unique	GATC	DDB_G0268268	-	DDB_G0268268	NA	NA	NA	NA	NA	NA	NA
DDB0232428	252240	TGTTATTGAATAATTTGATC	1	GATCCATCATCATCAATATC	1	unique	GATC	DDB_G0268268	-	DDB_G0268268	NA	NA	NA	NA	NA	NA	NA
DDB0232428	254929	CTAGTTGTCATTATAGGATC	1	GATCCACTTTTTCTGGATCA	1	unique	GATC	DDB_G0267508	-	DDB_G0267508	NA	NA	NA	NA	NA	NA	NA
DDB0232428	254944	GGATCCACTTTTTCTGGATC	1	GATCATTTTTTAAATTCATA	1	unique	GATC	DDB_G0267508	-	DDB_G0267508	NA	NA	NA	NA	NA	NA	NA
DDB0232428	255035	CAAGTATAAAGAAGAAGATC	1	GATCAAAATAAAATGATGAT	1	unique	GATC	DDB_G0267508	-	DDB_G0267508	NA	NA	NA	NA	NA	NA	NA
DDB0232428	256753	TTTTTCTTTTCAATATGATC	1	GATCAGATAAAATAATATCA	1	unique	GATC	DDB_G0267510	-	DDB_G0267510	similar to coiled-coil domain containing protein 43 (CCDC43)%3B contains two predicted coiled-coil domains	NA	NA	NA	NA	NA	NA
DDB0232428	257740	CAAGTTACATCAACTTGATC	1	GATCAGTTCTAAAACGTTGA	1	unique	GATC	DDB_G0267512	-	DDB_G0267512	NA	NA	NA	NA	NA	NA	NA
DDB0232428	257891	TACCATTACGTTGAGAGATC	1	GATCATTTGTTGAATCATCT	1	unique	GATC	DDB_G0267512	-	DDB_G0267512	NA	NA	NA	NA	NA	NA	NA
DDB0232428	258305	TTTTTAACGAGTATGAGATC	1	GATCACTTGGGTGTTACCAC	1	unique	GATC	DDB_G0267512	-	DDB_G0267512	NA	NA	NA	NA	NA	NA	NA
DDB0232428	258346	ACATATAGAATTGTTGGATC	1	GATCAACAGCACCTGTAATT	1	unique	GATC	DDB_G0267512	-	DDB_G0267512	NA	NA	NA	NA	NA	NA	NA
DDB0232428	258459	AACTGTAACTGCAACTGATC	1	GATCTCAATGGTGGTCCCAT	1	unique	GATC	DDB_G0267512	-	DDB_G0267512	NA	NA	NA	NA	NA	NA	NA
DDB0232428	258570	TAATGATAATATAAATGATC	1	GATCTATGATGTTTGGCTGT	1	unique	GATC	DDB_G0267512	-	DDB_G0267512	NA	NA	NA	NA	NA	NA	NA
DDB0232428	259125	GAAGGACGTTTTAAAGGATC	1	GATCTTGATGCCAACAAGCT	1	unique	GATC	DDB_G0267514	-	DDB_G0267514	member of the TKL (tyrosine kinase-like) group of protein kinases	NA	NA	NA	NA	NA	NA
DDB0232428	259589	TAAAGCGTCATACAATGATC	1	GATCCACCAGGTAAATATTC	1	unique	GATC	DDB_G0267514	-	DDB_G0267514	member of the TKL (tyrosine kinase-like) group of protein kinases	NA	NA	NA	NA	NA	NA
DDB0232428	262826	TAGTCCTAGGACCTGAGATC	1	GATCTTGCCGATTTGAGTTA	1	unique	GATC	NA	NA	NA	NA	DDB_G0267514	DDB_G0267516	-	-	1010	391
DDB0232428	263297	GTTGAATAAGATGGTTGATC	1	GATCAATTTTTTGTTTTAAT	1	unique	GATC	DDB_G0267516	-	dhx57	putative RNA helicase%3B contains an RWD domain (RING finger and WD repeat)	NA	NA	NA	NA	NA	NA
DDB0232428	263337	GATTGAATAAGATTCTGATC	1	GATCTCTTTTAATAATACAA	1	unique	GATC	DDB_G0267516	-	dhx57	putative RNA helicase%3B contains an RWD domain (RING finger and WD repeat)	NA	NA	NA	NA	NA	NA
DDB0232428	263569	CTCTTTAAAGTTTGTTGATC	1	GATCTTGGATGAATGAAAAC	1	unique	GATC	DDB_G0267516	-	dhx57	putative RNA helicase%3B contains an RWD domain (RING finger and WD repeat)	NA	NA	NA	NA	NA	NA
DDB0232428	264056	TTGATAAGAGTTTGATGATC	1	GATCTGATTGATTTGGTGAT	1	unique	GATC	DDB_G0267516	-	dhx57	putative RNA helicase%3B contains an RWD domain (RING finger and WD repeat)	NA	NA	NA	NA	NA	NA
DDB0232428	264164	GCAATTGTTAAAATTGGATC	1	GATCTAAACATCTAAATATA	1	unique	GATC	DDB_G0267516	-	dhx57	putative RNA helicase%3B contains an RWD domain (RING finger and WD repeat)	NA	NA	NA	NA	NA	NA
DDB0232428	264461	ATCTCTGGTGTATCTTGATC	1	GATCTTGAAGTTGTGATTCC	1	unique	GATC	DDB_G0267516	-	dhx57	putative RNA helicase%3B contains an RWD domain (RING finger and WD repeat)	NA	NA	NA	NA	NA	NA
DDB0232428	264740	TCAAATACTTTTTGTTGATC	1	GATCCTTTGGTGATAATGAA	1	unique	GATC	DDB_G0267516	-	dhx57	putative RNA helicase%3B contains an RWD domain (RING finger and WD repeat)	NA	NA	NA	NA	NA	NA
DDB0232428	264956	AAATTAATTCTTTTTTGATC	1	GATCAATACTAATTTTTAAT	1	unique	GATC	DDB_G0267516	-	dhx57	putative RNA helicase%3B contains an RWD domain (RING finger and WD repeat)	NA	NA	NA	NA	NA	NA
DDB0232428	265334	ATGATGATATGTGATAGATC	1	GATCAGAGATGTTTGATACA	1	unique	GATC	DDB_G0267516	-	dhx57	putative RNA helicase%3B contains an RWD domain (RING finger and WD repeat)	NA	NA	NA	NA	NA	NA
DDB0232428	265558	AACTATATTACACTCTGATC	1	GATCCTTTCTCTTGGGAAAT	1	unique	GATC	DDB_G0267516	-	dhx57	putative RNA helicase%3B contains an RWD domain (RING finger and WD repeat)	NA	NA	NA	NA	NA	NA
DDB0232428	266027	ATATTTGAAATATTTTGATC	1	GATCCAACCAAGATATTATA	1	unique	GATC	DDB_G0267516	-	dhx57	putative RNA helicase%3B contains an RWD domain (RING finger and WD repeat)	NA	NA	NA	NA	NA	NA
DDB0232428	266726	CCATGAATATTATTATGATC	1	GATCACAAACATTTACCAAT	1	unique	GATC	DDB_G0267516	-	dhx57	putative RNA helicase%3B contains an RWD domain (RING finger and WD repeat)	NA	NA	NA	NA	NA	NA
DDB0232428	267056	TCTTGTTTTGATTCTTGATC	1	GATCTAATTGCATCCAAAAG	1	unique	GATC	DDB_G0267516	-	dhx57	putative RNA helicase%3B contains an RWD domain (RING finger and WD repeat)	NA	NA	NA	NA	NA	NA
DDB0232428	267650	TGGGGGTGTTGGTGTTGATC	1	GATCCTTTTGCCATCTATCT	1	unique	GATC	DDB_G0267516	-	dhx57	putative RNA helicase%3B contains an RWD domain (RING finger and WD repeat)	NA	NA	NA	NA	NA	NA
DDB0232428	268347	GCTTTGGATAAATTAAGATC	1	GATCAATGATATAATCAATT	1	unique	GATC	NA	NA	NA	NA	DDB_G0267516	DDB_G0267522	-	-	687	1343
DDB0232428	268446	CACTGGTGGGAATTCAGATC	1	GATCAATCATTTCAACTAAT	1	unique	GATC	NA	NA	NA	NA	DDB_G0267516	DDB_G0267522	-	-	786	1244
DDB0232428	269752	CAATTACTATCTTCTGGATC	1	GATCAAATTCAATAAGACCA	1	unique	GATC	DDB_G0267522	-	DDB_G0267522	NA	NA	NA	NA	NA	NA	NA
DDB0232428	270340	TTACGAATAAGAAGACGATC	1	GATCAAAATGTTTTTCAATT	1	unique	GATC	DDB_G0267522	-	DDB_G0267522	NA	NA	NA	NA	NA	NA	NA
DDB0232428	270457	GGAATTTCCGATAATGGATC	1	GATCGATTCTATATTTAATA	1	unique	GATC	DDB_G0267522	-	DDB_G0267522	NA	NA	NA	NA	NA	NA	NA
DDB0232428	270952	AAAAACGATATATCTTGATC	1	GATCTTTGTTGATTAATGAT	1	unique	GATC	DDB_G0267522	-	DDB_G0267522	NA	NA	NA	NA	NA	NA	NA
DDB0232428	271856	CCATAAATAATCATATGATC	1	GATCATCAATTGACATGAAA	1	unique	GATC	DDB_G0267524	-	ssr3	subunit of the TRAP complex aids in the translocation of nascent polypeptides into the lumen of the endoplasmic reticulum	NA	NA	NA	NA	NA	NA
DDB0232428	272275	AATTTTAAAAATTTGTGATC	1	GATCATGCTGAAAAAAAAAA	1	unique	GATC	NA	NA	NA	NA	DDB_G0267524	DDB_G0267526	-	+	78	504
DDB0232428	273534	TTTTTTTTTTTTTAATGATC	7	GATCATTAAAAATTTAAAGT	1	unique_one	GATC	DDB_G0267526	+	DDB_G0267526	NA	NA	NA	NA	NA	NA	NA
DDB0232428	273608	TGTTGAAAGAATGTGTGATC	1	GATCATATTAAATTTTTAAT	1	unique	GATC	DDB_G0267526	+	DDB_G0267526	NA	NA	NA	NA	NA	NA	NA
DDB0232428	273672	ATATTCTTTACAAGTGGATC	1	GATCATTTTCATCTAAAAAA	1	unique	GATC	DDB_G0267526	+	DDB_G0267526	NA	NA	NA	NA	NA	NA	NA
DDB0232428	273713	TGACGAAGCAATGGTTGATC	1	GATCAAGCTGATGAAAAACC	1	unique	GATC	DDB_G0267526	+	DDB_G0267526	NA	NA	NA	NA	NA	NA	NA
DDB0232428	274385	AAATATCACCACCAGTGATC	1	GATCCATTCTAATTGTTTAC	1	unique	GATC	DDB_G0267528	-	DDB_G0267528	NA	NA	NA	NA	NA	NA	NA
DDB0232428	274546	AAACCTGCGAAAATTTGATC	1	GATCCAAATTACCAAATCTC	1	unique	GATC	DDB_G0267528	-	DDB_G0267528	NA	NA	NA	NA	NA	NA	NA
DDB0232428	274789	TTAGTATCCTCTGGACGATC	1	GATCACCAATTCTCCAAAAG	1	unique	GATC	DDB_G0267528	-	DDB_G0267528	NA	NA	NA	NA	NA	NA	NA
DDB0232428	274822	AAGAATCTCCATTTTGGATC	1	GATCGGCTCCTTTTGGTGCA	1	unique	GATC	DDB_G0267528	-	DDB_G0267528	NA	NA	NA	NA	NA	NA	NA
DDB0232428	274885	GTGATAACTTCACTATGATC	1	GATCTCTTGGTTCCTCTGTA	1	unique	GATC	DDB_G0267528	-	DDB_G0267528	NA	NA	NA	NA	NA	NA	NA
DDB0232428	275210	GCTTCAGCACTGGTTGGATC	1	GATCAGCAAGAAATCTAGAA	1	unique	GATC	DDB_G0267528	-	DDB_G0267528	NA	NA	NA	NA	NA	NA	NA
DDB0232428	275777	AAATCTTTTATTTGCAGATC	1	GATCCAATTTTTTTTTTTTT	2	unique_one	GATC	NA	NA	NA	NA	DDB_G0267528	DDB_G0267530	-	+	522	918
DDB0232428	276710	AAAAATGGGTGTAGAAGATC	1	GATCAACCACAAACTCAACC	1	unique	GATC	DDB_G0267530	+	DDB_G0267530	NA	NA	NA	NA	NA	NA	NA
DDB0232428	276959	AACTTATTGTCATGATGATC	1	GATCATCAACCATTACTTCA	1	unique	GATC	DDB_G0267530	+	DDB_G0267530	NA	NA	NA	NA	NA	NA	NA
DDB0232428	278114	AGTTGTGGACCATATTGATC	1	GATCAATACCAGTGATTGCA	1	unique	GATC	DDB_G0267408	-	psmA3	subunit of the 20S proteasome (macropain)%2C the endopeptidase complex involved in an ATP%2Fubiquitin-dependent nonlysosomal proteolytic pathway%3B in eukaryotes composed of up to 28 subunits%2C which form a highly ordered ring-shaped structure (20S ring)	NA	NA	NA	NA	NA	NA
DDB0232428	278776	TTTTATACCTACACCTGATC	1	GATCCTACACTAGACATTTT	1	unique	GATC	DDB_G0267408	-	psmA3	subunit of the 20S proteasome (macropain)%2C the endopeptidase complex involved in an ATP%2Fubiquitin-dependent nonlysosomal proteolytic pathway%3B in eukaryotes composed of up to 28 subunits%2C which form a highly ordered ring-shaped structure (20S ring)	NA	NA	NA	NA	NA	NA
DDB0232428	278998	TTTAATGGAGTGTGATGATC	1	GATCAATTTTTTAATTTAAT	1	unique	GATC	NA	NA	NA	NA	DDB_G0267408	DDB_G0268270	-	-	209	602
DDB0232428	279374	TTTATTTTGTGTATTTGATC	1	GATCCATTGTTTATCTTGGC	1	unique	GATC	NA	NA	NA	NA	DDB_G0267408	DDB_G0268270	-	-	585	226
DDB0232428	280435	CAATAATTCAAAAATTGATC	1	GATCCATTTCTTCGACAATT	1	unique	GATC	DDB_G0268270	-	DDB_G0268270	contains a predicted signal peptide and a putative C-terminal transmembrane domain	NA	NA	NA	NA	NA	NA
DDB0232428	281181	TATATCTATCAACCAAGATC	1	GATCATTTCACCAAGAATAT	1	unique	GATC	DDB_G0268270	-	DDB_G0268270	contains a predicted signal peptide and a putative C-terminal transmembrane domain	NA	NA	NA	NA	NA	NA
DDB0232428	281558	ATATTCTCTGCAACTTGATC	1	GATCATGAATACAATCATAT	1	unique	GATC	DDB_G0268270	-	DDB_G0268270	contains a predicted signal peptide and a putative C-terminal transmembrane domain	NA	NA	NA	NA	NA	NA
DDB0232428	282112	AGGAAGGTTAAAAAAAGATC	1	GATCATCTGATTTTATAACC	1	unique	GATC	NA	NA	NA	NA	DDB_G0268270	DDB_G0267532	-	+	275	1383
DDB0232428	284489	ACTTTATTAAAAGCAAGATC	1	GATCTTGTCTTTCAAATTGG	1	unique	GATC	DDB_G0267532	+	DDB_G0267532	NA	NA	NA	NA	NA	NA	NA
DDB0232428	285721	TGAATTTAATTTAAATGATC	1	GATCATCAAAATATAATTGA	1	unique	GATC	DDB_G0267532	+	DDB_G0267532	NA	NA	NA	NA	NA	NA	NA
DDB0232428	285985	TTCAAATCTTATTGAAGATC	1	GATCATCCATTTGATATTTA	1	unique	GATC	DDB_G0267532	+	DDB_G0267532	NA	NA	NA	NA	NA	NA	NA
DDB0232428	286997	CTACTACCACCATGATGATC	1	GATCAGATGTTTTCAAAACT	1	unique	GATC	DDB_G0267388	-	dafE	NA	NA	NA	NA	NA	NA	NA
DDB0232428	288558	TCTCTACGAATTAAGAGATC	1	GATCTGGAACTTCATTAAAA	1	unique	GATC	DDB_G0267534	-	DDB_G0267534	NA	NA	NA	NA	NA	NA	NA
DDB0232428	288867	TTATCATCAGTCGTAAGATC	1	GATCTGCTTTAAGAATTGGT	1	unique	GATC	DDB_G0267534	-	DDB_G0267534	NA	NA	NA	NA	NA	NA	NA
DDB0232428	289247	ATTATTATTATTTGATGATC	2	GATCTTCTCCATGGAAGCCA	1	unique_one	GATC	DDB_G0267534	-	DDB_G0267534	NA	NA	NA	NA	NA	NA	NA
DDB0232428	291066	GTTACCACCATCAATTGATC	1	GATCAAATCGATCAAACTCT	1	unique	GATC	DDB_G0267536	+	hibch	catalyzes the reaction: 3-hydroxy-2-methylpropanoyl-CoA %2B H2O %3D CoA %2B 3-hydroxy-2-methylpropanoate%3B ortholog of the mammalian HIBCH enzyme	NA	NA	NA	NA	NA	NA
DDB0232428	291075	ATCAATTGATCAAATCGATC	1	GATCAAACTCTTGTAAACTC	1	unique	GATC	DDB_G0267536	+	hibch	catalyzes the reaction: 3-hydroxy-2-methylpropanoyl-CoA %2B H2O %3D CoA %2B 3-hydroxy-2-methylpropanoate%3B ortholog of the mammalian HIBCH enzyme	NA	NA	NA	NA	NA	NA
DDB0232428	291487	GTTTTTTCTGGATTCGGATC	1	GATCTGTCGTTCTTTTAAAA	1	unique	GATC	NA	NA	NA	NA	DDB_G0267536	DDB_G0267538	+	+	353	284
DDB0232428	292291	AGAGCCATCAGAAGGAGATC	1	GATCAAACTAGAATTAGACA	1	unique	GATC	DDB_G0267538	+	DDB_G0267538	NA	NA	NA	NA	NA	NA	NA
DDB0232428	293970	AAAAAAAAGGAAAAAGGATC	1	GATCTATGTGCATGAATTTT	1	unique	GATC	NA	NA	NA	NA	DDB_G0267538	DDB_G0268480	+	-	150	78
DDB0232428	294320	GTAATTCTTTTTGTTGGATC	1	GATCATAAGTTAGTAATTGA	1	unique	GATC	DDB_G0268480	-	cdk10	putative cell division cycle 2 (CDC2)-like protein kinase%3B has similarity to PITSLRE proteins and other cyclin-dependent kinase 2 kinases	NA	NA	NA	NA	NA	NA
DDB0232428	294506	AATATACGCATAATTTGATC	1	GATCCACTTCATTATTACCA	1	unique	GATC	DDB_G0268480	-	cdk10	putative cell division cycle 2 (CDC2)-like protein kinase%3B has similarity to PITSLRE proteins and other cyclin-dependent kinase 2 kinases	NA	NA	NA	NA	NA	NA
DDB0232428	295034	TATTTTATCACCAGTAGATC	1	GATCCAATTACAACTTCTAA	1	unique	GATC	DDB_G0268480	-	cdk10	putative cell division cycle 2 (CDC2)-like protein kinase%3B has similarity to PITSLRE proteins and other cyclin-dependent kinase 2 kinases	NA	NA	NA	NA	NA	NA
DDB0232428	295435	CTCAAAAGATAAAACAGATC	1	GATCGCATTTGGTGAGGAGT	1	unique	GATC	DDB_G0268480	-	cdk10	putative cell division cycle 2 (CDC2)-like protein kinase%3B has similarity to PITSLRE proteins and other cyclin-dependent kinase 2 kinases	NA	NA	NA	NA	NA	NA
DDB0232428	296382	TTTTAATTTTTCAAAAGATC	1	GATCACATATGTGTTTGATA	1	unique	GATC	NA	NA	NA	NA	DDB_G0268480	DDB_G0267470	-	+	943	2145
DDB0232428	296995	TTAACAAAAACCATATGATC	1	GATCAATCATATTATAGTAA	1	unique	GATC	NA	NA	NA	NA	DDB_G0268480	DDB_G0267470	-	+	1556	1532
DDB0232428	297886	TCTCTCAATCTTGTTTGATC	1	GATCACTAATCAATCAAAAA	1	unique	GATC	NA	NA	NA	NA	DDB_G0268480	DDB_G0267470	-	+	2447	641
DDB0232428	299208	TGGTTTAGTATTGAATGATC	1	GATCAAAGTAAAATAGTTGC	1	unique	GATC	DDB_G0267470	+	dicB	forms a discoidin-inducing complex (DIC) with dicA1%2C pdsA%2C and an unknown protein%3B dicB alone does not induce discoidin expression	NA	NA	NA	NA	NA	NA
DDB0232428	299274	TGTTGTTACATTGAATGATC	1	GATCAATCGAGTATTCAATT	1	unique	GATC	DDB_G0267470	+	dicB	forms a discoidin-inducing complex (DIC) with dicA1%2C pdsA%2C and an unknown protein%3B dicB alone does not induce discoidin expression	NA	NA	NA	NA	NA	NA
DDB0232428	300039	TAAATTATATACTTACGATC	1	GATCCAGATAATGATGTTAT	1	unique	GATC	DDB_G0267470	+	dicB	forms a discoidin-inducing complex (DIC) with dicA1%2C pdsA%2C and an unknown protein%3B dicB alone does not induce discoidin expression	NA	NA	NA	NA	NA	NA
DDB0232428	300273	AACTTCAAAAAAGAATGATC	1	GATCAAAGAAATGATTCTCA	1	unique	GATC	DDB_G0267470	+	dicB	forms a discoidin-inducing complex (DIC) with dicA1%2C pdsA%2C and an unknown protein%3B dicB alone does not induce discoidin expression	NA	NA	NA	NA	NA	NA
DDB0232428	301378	TGTGAATTTTGATTTGGATC	1	GATCATTTGGATTTGTATTT	1	unique	GATC	DDB_G0267540	-	scy1	N-terminal kinase-like (NTKL) protein%3B does not contain the consensus sequences required for kinase function%2C however%2C the SCY1 family encodes highly conserved non-canonical kinases that are believed to function	NA	NA	NA	NA	NA	NA
DDB0232428	301639	TGAGAAGGAACGAAAGGATC	1	GATCCTTCAAGGCAGTTGAA	1	unique	GATC	DDB_G0267540	-	scy1	N-terminal kinase-like (NTKL) protein%3B does not contain the consensus sequences required for kinase function%2C however%2C the SCY1 family encodes highly conserved non-canonical kinases that are believed to function	NA	NA	NA	NA	NA	NA
DDB0232428	301756	CTGACACCAGCTTGTTGATC	1	GATCTTTTTGAAGTGCAGCG	1	unique	GATC	DDB_G0267540	-	scy1	N-terminal kinase-like (NTKL) protein%3B does not contain the consensus sequences required for kinase function%2C however%2C the SCY1 family encodes highly conserved non-canonical kinases that are believed to function	NA	NA	NA	NA	NA	NA
DDB0232428	301793	AATATTTCAAAAGAATGATC	1	GATCATTGTTTTCTCTTGTA	1	unique	GATC	DDB_G0267540	-	scy1	N-terminal kinase-like (NTKL) protein%3B does not contain the consensus sequences required for kinase function%2C however%2C the SCY1 family encodes highly conserved non-canonical kinases that are believed to function	NA	NA	NA	NA	NA	NA
DDB0232428	301903	ACATGTGGAAATATTTGATC	1	GATCATTAATAGTGGCCTCA	1	unique	GATC	DDB_G0267540	-	scy1	N-terminal kinase-like (NTKL) protein%3B does not contain the consensus sequences required for kinase function%2C however%2C the SCY1 family encodes highly conserved non-canonical kinases that are believed to function	NA	NA	NA	NA	NA	NA
DDB0232428	302049	CTCTGTTGATAAATTTGATC	1	GATCCAATCTTTAACAAAGT	1	unique	GATC	DDB_G0267540	-	scy1	N-terminal kinase-like (NTKL) protein%3B does not contain the consensus sequences required for kinase function%2C however%2C the SCY1 family encodes highly conserved non-canonical kinases that are believed to function	NA	NA	NA	NA	NA	NA
DDB0232428	302170	ATTTTTTCAATATGTTGATC	1	GATCTAATTTTCTAAATAAA	1	unique	GATC	DDB_G0267540	-	scy1	N-terminal kinase-like (NTKL) protein%3B does not contain the consensus sequences required for kinase function%2C however%2C the SCY1 family encodes highly conserved non-canonical kinases that are believed to function	NA	NA	NA	NA	NA	NA
DDB0232428	302437	AATTGTTTTGGTATTTGATC	1	GATCTAAATTCTTTATATCT	1	unique	GATC	DDB_G0267540	-	scy1	N-terminal kinase-like (NTKL) protein%3B does not contain the consensus sequences required for kinase function%2C however%2C the SCY1 family encodes highly conserved non-canonical kinases that are believed to function	NA	NA	NA	NA	NA	NA
DDB0232428	303258	TTATTTGAAATTGTTTGATC	1	GATCGATTTTAACAATCAAA	1	unique	GATC	NA	NA	NA	NA	DDB_G0267540	DDB_G0267542	-	+	26	551
DDB0232428	304325	TTATAATCAATCAATCGATC	1	GATCAAAACATTTCATTATC	1	unique	GATC	NA	NA	NA	NA	DDB_G0267542	DDB_G0268272	+	-	289	594
DDB0232428	304564	ATAATTTGATAATATAGATC	2	GATCTTGTAATTTTCCCACC	2	not_unique	GATC	NA	NA	NA	NA	DDB_G0267542	DDB_G0268272	+	-	528	355
DDB0232428	304682	ATTTCATTTTTTAATTGATC	1	GATCTATTTCAATATGATGA	1	unique	GATC	NA	NA	NA	NA	DDB_G0267542	DDB_G0268272	+	-	646	237
DDB0232428	304700	TCTATTTCAATATGATGATC	1	GATCACCAGCATTTTTTAAA	1	unique	GATC	NA	NA	NA	NA	DDB_G0267542	DDB_G0268272	+	-	664	219
DDB0232428	305022	AAATTTTGATATGACAGATC	1	GATCTTATAATTTTCCCATT	1	unique	GATC	DDB_G0268272	-	aslN	similar to acetyl-CoA synthetase%2C which condenses acetate and CoA to acetyl-coA	NA	NA	NA	NA	NA	NA
DDB0232428	305161	ATATCAATATGATGATGATC	2	GATCATCAGCATTTTTTAAA	2	not_unique	GATC	DDB_G0268272	-	aslN	similar to acetyl-CoA synthetase%2C which condenses acetate and CoA to acetyl-coA	NA	NA	NA	NA	NA	NA
DDB0232428	305311	TCATTTAAAGTTAATTGATC	1	GATCTTCTATTCTTGAAATT	1	unique	GATC	DDB_G0268272	-	aslN	similar to acetyl-CoA synthetase%2C which condenses acetate and CoA to acetyl-coA	NA	NA	NA	NA	NA	NA
DDB0232428	305683	TAATCTGATAATGATGGATC	1	GATCAGTAGGTTCCCCTCCA	1	unique	GATC	DDB_G0268272	-	aslN	similar to acetyl-CoA synthetase%2C which condenses acetate and CoA to acetyl-coA	NA	NA	NA	NA	NA	NA
DDB0232428	305761	AAATTCTCAGCATTAGGATC	2	GATCAGTATTAATTTGGCGT	1	unique_one	GATC	DDB_G0268272	-	aslN	similar to acetyl-CoA synthetase%2C which condenses acetate and CoA to acetyl-coA	NA	NA	NA	NA	NA	NA
DDB0232428	306616	TAAATTATTGCCACTTGATC	2	GATCCCTTTTTAATGGATTA	2	not_unique	GATC	DDB_G0268272	-	aslN	similar to acetyl-CoA synthetase%2C which condenses acetate and CoA to acetyl-coA	NA	NA	NA	NA	NA	NA
DDB0232428	307811	ATAATTTGATAATATAGATC	2	GATCTTGTAATTTTCCCACC	2	not_unique	GATC	DDB_G0267544	-	aslM	similar to bacterial acetyl-CoA synthetase%2C which condenses acetate and CoA to acetyl-coA	NA	NA	NA	NA	NA	NA
DDB0232428	307950	ATATCAATATGATGATGATC	2	GATCATCAGCATTTTTTAAA	2	not_unique	GATC	DDB_G0267544	-	aslM	similar to bacterial acetyl-CoA synthetase%2C which condenses acetate and CoA to acetyl-coA	NA	NA	NA	NA	NA	NA
DDB0232428	308075	TTTATTTAAAATAATTGATC	1	GATCTTCCATCACTAAAATT	1	unique	GATC	DDB_G0267544	-	aslM	similar to bacterial acetyl-CoA synthetase%2C which condenses acetate and CoA to acetyl-coA	NA	NA	NA	NA	NA	NA
DDB0232428	308100	TCACTAAAATTTAATTGATC	1	GATCTTCTAATCTTGAAACC	1	unique	GATC	DDB_G0267544	-	aslM	similar to bacterial acetyl-CoA synthetase%2C which condenses acetate and CoA to acetyl-coA	NA	NA	NA	NA	NA	NA
DDB0232428	308550	AAATTCTCAGCATTAGGATC	2	GATCATATTTAATAAGGTTT	1	unique_one	GATC	DDB_G0267544	-	aslM	similar to bacterial acetyl-CoA synthetase%2C which condenses acetate and CoA to acetyl-coA	NA	NA	NA	NA	NA	NA
DDB0232428	309405	TAAATTATTGCCACTTGATC	2	GATCCCTTTTTAATGGATTA	2	not_unique	GATC	DDB_G0267544	-	aslM	similar to bacterial acetyl-CoA synthetase%2C which condenses acetate and CoA to acetyl-coA	NA	NA	NA	NA	NA	NA
DDB0232428	310396	ACCATATAAACATTTTGATC	1	GATCTGGTTAAAAAATTTAG	1	unique	GATC	NA	NA	NA	NA	DDB_G0267544	DDB_G0267546	-	+	612	859
DDB0232428	310536	AATTTACAAAAATGAAGATC	1	GATCTAAAAATTAAAATTTT	1	unique	GATC	NA	NA	NA	NA	DDB_G0267544	DDB_G0267546	-	+	752	719
DDB0232428	310997	CGAAATGGGAAATTAAGATC	1	GATCTTTAAAGGGGGTTCGT	1	unique	GATC	NA	NA	NA	NA	DDB_G0267544	DDB_G0267546	-	+	1213	258
DDB0232428	311597	ACAATTTTCATTTGATGATC	1	GATCATTGTGCTCTCATATT	1	unique	GATC	DDB_G0267546	+	DDB_G0267546	NA	NA	NA	NA	NA	NA	NA
DDB0232428	311947	AAGTCAAGATACTTCTGATC	1	GATCTTCAAAAATGTTTTGA	1	unique	GATC	DDB_G0267546	+	DDB_G0267546	NA	NA	NA	NA	NA	NA	NA
DDB0232428	312275	TGTAAATACTCTTTTTGATC	1	GATCATCCTGGTAGAAAAAT	1	unique	GATC	DDB_G0267546	+	DDB_G0267546	NA	NA	NA	NA	NA	NA	NA
DDB0232428	312924	TTGGTGTAAAGTGATAGATC	1	GATCTCTTTACTTTTTTTTT	1	unique	GATC	NA	NA	NA	NA	DDB_G0267546	DDB_G0267548	+	-	254	191
DDB0232428	313588	GCATCAGTTAAACTTTGATC	1	GATCAGATATTGATCTATTA	1	unique	GATC	DDB_G0267548	-	elmoF	NA	NA	NA	NA	NA	NA	NA
DDB0232428	313599	ACTTTGATCAGATATTGATC	1	GATCTATTAATACCATTATT	1	unique	GATC	DDB_G0267548	-	elmoF	NA	NA	NA	NA	NA	NA	NA
DDB0232428	313846	ACAGATTGTAATGATTGATC	1	GATCATTCATTAAATTAATA	1	unique	GATC	DDB_G0267548	-	elmoF	NA	NA	NA	NA	NA	NA	NA
DDB0232428	314277	ACCACTTGATTTCAATGATC	1	GATCTTTTACCATCATCTAT	1	unique	GATC	DDB_G0267548	-	elmoF	NA	NA	NA	NA	NA	NA	NA
DDB0232428	314329	ACTTGTTGTTGTGATTGATC	1	GATCATCAGTAGTAGTAGTG	1	unique	GATC	DDB_G0267548	-	elmoF	NA	NA	NA	NA	NA	NA	NA
DDB0232428	314556	AATTGATGATGAACCAGATC	1	GATCTTAATTTTCTTGATAA	2	unique_one	GATC	DDB_G0267548	-	elmoF	NA	NA	NA	NA	NA	NA	NA
DDB0232428	315346	TCAAACCAATCATCTTGATC	1	GATCAAATATAATTTCATAT	1	unique	GATC	DDB_G0267548	-	elmoF	NA	NA	NA	NA	NA	NA	NA
DDB0232428	316169	GCAACTAATTTATCATGATC	1	GATCTTCTGCAGTATTATTA	1	unique	GATC	DDB_G0267548	-	elmoF	NA	NA	NA	NA	NA	NA	NA
DDB0232428	318053	TTTATGGGATTTTTTTGATC	1	GATCAAAATAAAATCTCCAC	1	unique	GATC	NA	NA	NA	NA	DDB_G0267548	DDB_G0268482	-	+	1296	159
DDB0232428	318629	CATGATTGAATCAAAGGATC	1	GATCATGTAAAGATTACAAA	1	unique	GATC	DDB_G0268482	+	DDB_G0268482_ps	putative pseudogene%3B similar to %3Ca href%3D%22%2Fgene%2FDDB_G0274851%22%3EDDB_G0274851%3C%2Fa%3E%2C %3Ca href%3D%22%2Fgene%2FDDB_G0269606%22%3EDDB_G0269606 %3C%2Fa%3E	NA	NA	NA	NA	NA	NA
DDB0232428	318722	AAATCTCATAAAGACTGATC	1	GATCATAATGAATTACATGT	1	unique	GATC	DDB_G0268482	+	DDB_G0268482_ps	putative pseudogene%3B similar to %3Ca href%3D%22%2Fgene%2FDDB_G0274851%22%3EDDB_G0274851%3C%2Fa%3E%2C %3Ca href%3D%22%2Fgene%2FDDB_G0269606%22%3EDDB_G0269606 %3C%2Fa%3E	NA	NA	NA	NA	NA	NA
DDB0232428	318779	TGAAAATTATTTAAATGATC	1	GATCAATATAAAACTTTACC	1	unique	GATC	DDB_G0268482	+	DDB_G0268482_ps	putative pseudogene%3B similar to %3Ca href%3D%22%2Fgene%2FDDB_G0274851%22%3EDDB_G0274851%3C%2Fa%3E%2C %3Ca href%3D%22%2Fgene%2FDDB_G0269606%22%3EDDB_G0269606 %3C%2Fa%3E	NA	NA	NA	NA	NA	NA
DDB0232428	319124	ATGTGATTCTAATGATGATC	1	GATCGTATTAAAAAGTTATT	1	unique	GATC	DDB_G0268482	+	DDB_G0268482_ps	putative pseudogene%3B similar to %3Ca href%3D%22%2Fgene%2FDDB_G0274851%22%3EDDB_G0274851%3C%2Fa%3E%2C %3Ca href%3D%22%2Fgene%2FDDB_G0269606%22%3EDDB_G0269606 %3C%2Fa%3E	NA	NA	NA	NA	NA	NA
DDB0232428	319769	GAGAGATTTTAATTTTGATC	1	GATCCAATTGAAATTAAGAG	1	unique	GATC	DDB_G0268482	+	DDB_G0268482_ps	putative pseudogene%3B similar to %3Ca href%3D%22%2Fgene%2FDDB_G0274851%22%3EDDB_G0274851%3C%2Fa%3E%2C %3Ca href%3D%22%2Fgene%2FDDB_G0269606%22%3EDDB_G0269606 %3C%2Fa%3E	NA	NA	NA	NA	NA	NA
DDB0232428	320809	AGAAATTACTCAAACTGATC	1	GATCATATTAATAAAGCAAT	1	unique	GATC	DDB_G0268274	+	DDB_G0268274	NA	NA	NA	NA	NA	NA	NA
DDB0232428	321133	CATTGATGATGATGATGATC	1	GATCAACAAGTAGTTGAACC	1	unique	GATC	DDB_G0268274	+	DDB_G0268274	NA	NA	NA	NA	NA	NA	NA
DDB0232428	322117	AAAGAAATATAAAAATGATC	1	GATCAAAATAAATAAACCTA	1	unique	GATC	DDB_G0268278	+	DDB_G0268278	NA	NA	NA	NA	NA	NA	NA
DDB0232428	323461	AATAACTGGTGTGAGAGATC	1	GATCCAAAAAAGGATGTCAT	1	unique	GATC	DDB_G0267550	+	DDB_G0267550	NA	NA	NA	NA	NA	NA	NA
DDB0232428	323761	TAAATCTGATTTCGGTGATC	1	GATCCAAAATCATTTGAATC	1	unique	GATC	DDB_G0267550	+	DDB_G0267550	NA	NA	NA	NA	NA	NA	NA
DDB0232428	325990	ATTAACTATACCAAATGATC	1	GATCCAATTACTTTAACCAA	1	unique	GATC	DDB_G0267554	+	DDB_G0267554	NA	NA	NA	NA	NA	NA	NA
DDB0232428	326066	GAACATACAGTTGTTGGATC	1	GATCATTATCAATAAAAATT	1	unique	GATC	DDB_G0267554	+	DDB_G0267554	NA	NA	NA	NA	NA	NA	NA
DDB0232428	326167	AGAATTTTCAATAAATGATC	1	GATCCTTTAGATTATATTGG	1	unique	GATC	DDB_G0267554	+	DDB_G0267554	NA	NA	NA	NA	NA	NA	NA
DDB0232428	326248	ATATGCTTCCGAATTCGATC	1	GATCCAGGTAATATTCCACC	1	unique	GATC	DDB_G0267554	+	DDB_G0267554	NA	NA	NA	NA	NA	NA	NA
DDB0232428	327351	CCAAGACGATGAGCACGATC	1	GATCTTCTGCTTGACGATCA	1	unique	GATC	DDB_G0267556	-	DDB_G0267556	chromatin remodeling complex subunit R (CHR) protein%3B SWI2%2FSNF2 homolog	NA	NA	NA	NA	NA	NA
DDB0232428	327366	CGATCTTCTGCTTGACGATC	1	GATCAACTTGAGGATTAAAT	1	unique	GATC	DDB_G0267556	-	DDB_G0267556	chromatin remodeling complex subunit R (CHR) protein%3B SWI2%2FSNF2 homolog	NA	NA	NA	NA	NA	NA
DDB0232428	327726	CAATATTTATCACCTAGATC	1	GATCTTCATGTTCACAAACT	1	unique	GATC	DDB_G0267556	-	DDB_G0267556	chromatin remodeling complex subunit R (CHR) protein%3B SWI2%2FSNF2 homolog	NA	NA	NA	NA	NA	NA
DDB0232428	328684	GATTATAGGTTGTTAAGATC	1	GATCACATTGAAATCTTTAC	1	unique	GATC	DDB_G0267556	-	DDB_G0267556	chromatin remodeling complex subunit R (CHR) protein%3B SWI2%2FSNF2 homolog	NA	NA	NA	NA	NA	NA
DDB0232428	329658	ATTTCAATACCACAAAGATC	1	GATCATCTTCGCCATCTTCA	1	unique	GATC	DDB_G0267556	-	DDB_G0267556	chromatin remodeling complex subunit R (CHR) protein%3B SWI2%2FSNF2 homolog	NA	NA	NA	NA	NA	NA
DDB0232428	331297	ATAAATTTCCTTTGGTGATC	1	GATCTTTTTTTTTTTTCTTC	1	unique	GATC	NA	NA	NA	NA	DDB_G0267556	DDB_G0268280	-	+	673	180
DDB0232428	332108	ATGTCTCAAACAAGTTGATC	1	GATCAAGATGATAAATTATT	1	unique	GATC	DDB_G0268280	+	DDB_G0268280	NA	NA	NA	NA	NA	NA	NA
DDB0232428	332240	AAATCATATTTATTTCGATC	1	GATCAAGAATTTCAAACTGA	1	unique	GATC	DDB_G0268280	+	DDB_G0268280	NA	NA	NA	NA	NA	NA	NA
DDB0232428	332270	AACTGAAACTGGTTATGATC	1	GATCAAAATGAATTAAATAA	1	unique	GATC	DDB_G0268280	+	DDB_G0268280	NA	NA	NA	NA	NA	NA	NA
DDB0232428	332558	ATTAATTAATTATCATGATC	1	GATCATTTAAATTGTTTCCA	1	unique	GATC	DDB_G0268280	+	DDB_G0268280	NA	NA	NA	NA	NA	NA	NA
DDB0232428	332883	AATATTTAATAGAGTAGATC	1	GATCAAACTTTAATAAATAA	1	unique	GATC	DDB_G0268280	+	DDB_G0268280	NA	NA	NA	NA	NA	NA	NA
DDB0232428	333330	TAAATTAAATAATTTAGATC	1	GATCTTAGATTTGATTTTAA	1	unique	GATC	DDB_G0268280	+	DDB_G0268280	NA	NA	NA	NA	NA	NA	NA
DDB0232428	334304	CAATTGTAACACAAAAGATC	1	GATCATTTTAAATTTAATTG	1	unique	GATC	DDB_G0268280	+	DDB_G0268280	NA	NA	NA	NA	NA	NA	NA
DDB0232428	334416	AATTAATGAATTTATCGATC	1	GATCATTCAAATTCTCAAAC	1	unique	GATC	DDB_G0268280	+	DDB_G0268280	NA	NA	NA	NA	NA	NA	NA
DDB0232428	334705	ATATCATTAATAATTAGATC	1	GATCCTGTGCAGATGTTGAT	1	unique	GATC	DDB_G0268280	+	DDB_G0268280	NA	NA	NA	NA	NA	NA	NA
DDB0232428	334726	TGTGCAGATGTTGATAGATC	1	GATCAGCTATGGATTTCTCT	1	unique	GATC	DDB_G0268280	+	DDB_G0268280	NA	NA	NA	NA	NA	NA	NA
DDB0232428	335664	TTATTTAATTTTATTAGATC	1	GATCCAACTATAATTGAAAC	1	unique	GATC	DDB_G0268280	+	DDB_G0268280	NA	NA	NA	NA	NA	NA	NA
DDB0232428	335689	ATAATTGAAACTACTCGATC	1	GATCAATTGCTTTAATACAA	1	unique	GATC	DDB_G0268280	+	DDB_G0268280	NA	NA	NA	NA	NA	NA	NA
DDB0232428	335982	AGGTATTAAATCAAATGATC	1	GATCCATATGATGATTTAGA	1	unique	GATC	DDB_G0268280	+	DDB_G0268280	NA	NA	NA	NA	NA	NA	NA
DDB0232428	336018	GAATTTCATTGATTGTGATC	1	GATCCTAATGTAAATTATTA	1	unique	GATC	DDB_G0268280	+	DDB_G0268280	NA	NA	NA	NA	NA	NA	NA
DDB0232428	336418	ACGTAAATTATCGACTGATC	1	GATCATTTTTAAGTTTAAAC	1	unique	GATC	DDB_G0267560	+	uprt	catalyzes the reaction UMP %2B diphosphate %3C%3D%3E uracil %2B 5-phospho-alpha-D-ribose 1-diphosphate	NA	NA	NA	NA	NA	NA
DDB0232428	337210	ACAAGTATTATTATTAGATC	1	GATCCAATGTTGGCAACTGG	1	unique	GATC	DDB_G0267560	+	uprt	catalyzes the reaction UMP %2B diphosphate %3C%3D%3E uracil %2B 5-phospho-alpha-D-ribose 1-diphosphate	NA	NA	NA	NA	NA	NA
DDB0232428	338530	TGCTCCATCAGATGAAGATC	1	GATCGTCATGTTGGTGATTT	1	unique	GATC	DDB_G0267420	+	sodA	superoxide dismutase of the SOD1 family%3B expressed at constant levels throughout the life cycle and upregulated upon oxidative stress%3B enriched in prespore cells	NA	NA	NA	NA	NA	NA
DDB0232428	338662	TATGGTTGTCCATGCTGATC	1	GATCAAGATGATTTAGGTAA	1	unique	GATC	DDB_G0267420	+	sodA	superoxide dismutase of the SOD1 family%3B expressed at constant levels throughout the life cycle and upregulated upon oxidative stress%3B enriched in prespore cells	NA	NA	NA	NA	NA	NA
DDB0232428	339655	TCGTCAACATCATCAAGATC	1	GATCACCATCAGTTGTTTTT	1	unique	GATC	DDB_G0267562	+	stcA	NA	NA	NA	NA	NA	NA	NA
DDB0232428	339690	TAAATCATATATTAATGATC	1	GATCATATTAGTAATAATGA	1	unique	GATC	DDB_G0267562	+	stcA	NA	NA	NA	NA	NA	NA	NA
DDB0232428	339864	TTTACCACTATTAAAAGATC	1	GATCATATTATTAATAAAAT	1	unique	GATC	DDB_G0267562	+	stcA	NA	NA	NA	NA	NA	NA	NA
DDB0232428	340091	TTGTACTATGGATAATGATC	1	GATCATCATAATATATTAGC	1	unique	GATC	DDB_G0267562	+	stcA	NA	NA	NA	NA	NA	NA	NA
DDB0232428	340664	TCATTTAGGTGTTAACGATC	1	GATCCCTCAAAGGCAATTGG	1	unique	GATC	DDB_G0267562	+	stcA	NA	NA	NA	NA	NA	NA	NA
DDB0232428	340814	TTCACCACATACAATCGATC	1	GATCAAACTCATACAGTTAC	1	unique	GATC	DDB_G0267562	+	stcA	NA	NA	NA	NA	NA	NA	NA
DDB0232428	341216	ATTAATTGTAAACATTGATC	1	GATCTAACTTTAGATTTATC	1	unique	GATC	DDB_G0267562	+	stcA	NA	NA	NA	NA	NA	NA	NA
DDB0232428	341267	ATGTCCTGGTTTTTATGATC	1	GATCATCATCATAAATTATT	1	unique	GATC	DDB_G0267562	+	stcA	NA	NA	NA	NA	NA	NA	NA
DDB0232428	341978	CAAATCATATTCAAAAGATC	1	GATCATCTAAATCAAGATAA	1	unique	GATC	DDB_G0267564	+	DDB_G0267564	similar to D. purpureum protein%3B contains a predicted signal anchor sequence	NA	NA	NA	NA	NA	NA
DDB0232428	344017	TCATGATGAAATTGTTGATC	1	GATCTTCTTTCATATCAATT	1	unique	GATC	DDB_G0267566	-	DDB_G0267566	putative protein serine%2Fthreonine kinase%3B contains an ankyrin repeat domain%3B similar to vertebrate Nek kinases which are involved in regulation of mitosis	NA	NA	NA	NA	NA	NA
DDB0232428	344128	TCAAAAGATGTTGGACGATC	1	GATCATATTCGTTATGATTT	1	unique	GATC	DDB_G0267566	-	DDB_G0267566	putative protein serine%2Fthreonine kinase%3B contains an ankyrin repeat domain%3B similar to vertebrate Nek kinases which are involved in regulation of mitosis	NA	NA	NA	NA	NA	NA
DDB0232428	345104	TATCAAATAATTTTGTGATC	1	GATCACACCAATTTCATATA	1	unique	GATC	DDB_G0267566	-	DDB_G0267566	putative protein serine%2Fthreonine kinase%3B contains an ankyrin repeat domain%3B similar to vertebrate Nek kinases which are involved in regulation of mitosis	NA	NA	NA	NA	NA	NA
DDB0232428	345175	TTGTAAATTTTACCTGGATC	1	GATCTCTTTCTGAAAAACTA	1	unique	GATC	DDB_G0267566	-	DDB_G0267566	putative protein serine%2Fthreonine kinase%3B contains an ankyrin repeat domain%3B similar to vertebrate Nek kinases which are involved in regulation of mitosis	NA	NA	NA	NA	NA	NA
DDB0232428	346192	GAAATTGGTATTGATTGATC	1	GATCTTTATATATTATGAAA	1	unique	GATC	DDB_G0267566	-	DDB_G0267566	putative protein serine%2Fthreonine kinase%3B contains an ankyrin repeat domain%3B similar to vertebrate Nek kinases which are involved in regulation of mitosis	NA	NA	NA	NA	NA	NA
DDB0232428	346972	AATTTTTTTTTTTTTTGATC	5	GATCTTACACACAACCCAAT	1	unique_one	GATC	NA	NA	NA	NA	DDB_G0267566	DDB_G0268284	-	+	260	1399
DDB0232428	347330	TTTTTTTTTTTTTTTCGATC	8	GATCACACACAACCCCATCT	1	unique_one	GATC	NA	NA	NA	NA	DDB_G0267566	DDB_G0268284	-	+	618	1041
DDB0232428	347721	TGAATTAAAAATAATTGATC	1	GATCTTGTTTTGGTATTTTT	1	unique	GATC	NA	NA	NA	NA	DDB_G0267566	DDB_G0268284	-	+	1009	650
DDB0232428	348618	CATTTTTTATCATTATGATC	1	GATCGTTCACCATTCCAATT	1	unique	GATC	DDB_G0268284	+	tgrO4	NA	NA	NA	NA	NA	NA	NA
DDB0232428	348759	TCATGAACGAAGTATGGATC	1	GATCGGGCTTTGTTTCCAAC	1	unique	GATC	DDB_G0268284	+	tgrO4	NA	NA	NA	NA	NA	NA	NA
DDB0232428	348936	TCAATTATCAAGCTTTGATC	1	GATCCAACAAATGTAAATGT	1	unique	GATC	DDB_G0268284	+	tgrO4	NA	NA	NA	NA	NA	NA	NA
DDB0232428	349161	TTCAAATATTGAAAAAGATC	1	GATCAAGATTCAATTATTAT	1	unique	GATC	DDB_G0268284	+	tgrO4	NA	NA	NA	NA	NA	NA	NA
DDB0232428	349283	AACCAGACCAATTAACGATC	1	GATCAACTCTGTACCAATCA	1	unique	GATC	DDB_G0268284	+	tgrO4	NA	NA	NA	NA	NA	NA	NA
DDB0232428	349685	TATTAAAAGATTTAGAGATC	1	GATCAATTATAATGAAACAG	1	unique	GATC	DDB_G0268284	+	tgrO4	NA	NA	NA	NA	NA	NA	NA
DDB0232428	351294	GTTAAAAAAACAAGAAGATC	2	GATCAATTAAAAAATGATAA	1	unique_one	GATC	DDB_G0268284	+	tgrO4	NA	NA	NA	NA	NA	NA	NA
DDB0232428	351351	TCAAAACCAACAACAAGATC	1	GATCTTGAAAATAAAAATGA	1	unique	GATC	DDB_G0268284	+	tgrO4	NA	NA	NA	NA	NA	NA	NA
DDB0232428	352283	TTTACCTTCTACACCAGATC	1	GATCTTGAAACACGTTCTGA	1	unique	GATC	DDB_G0267396	-	kif2	belongs to the NCD%2FKar3 subfamily%2C predicted to play a role in mitosis	NA	NA	NA	NA	NA	NA
DDB0232428	352403	CGTATGAGAACGTGATGATC	1	GATCTCTCATTACAAAGTGT	1	unique	GATC	DDB_G0267396	-	kif2	belongs to the NCD%2FKar3 subfamily%2C predicted to play a role in mitosis	NA	NA	NA	NA	NA	NA
DDB0232428	352433	AAGTGTTTTTGCAACTGATC	1	GATCTATTTTTATTTGCCAA	1	unique	GATC	DDB_G0267396	-	kif2	belongs to the NCD%2FKar3 subfamily%2C predicted to play a role in mitosis	NA	NA	NA	NA	NA	NA
DDB0232428	352608	GTAGTAGTATTTAAAAGATC	1	GATCATTAATAGTTTCATTA	1	unique	GATC	DDB_G0267396	-	kif2	belongs to the NCD%2FKar3 subfamily%2C predicted to play a role in mitosis	NA	NA	NA	NA	NA	NA
DDB0232428	352680	CAACCTTTTTCAGTTAGATC	1	GATCTTGAATGGATGAGAAA	1	unique	GATC	DDB_G0267396	-	kif2	belongs to the NCD%2FKar3 subfamily%2C predicted to play a role in mitosis	NA	NA	NA	NA	NA	NA
DDB0232428	352893	GAAGGACCAAATACACGATC	1	GATCAAATGTAAACGTTGAT	1	unique	GATC	DDB_G0267396	-	kif2	belongs to the NCD%2FKar3 subfamily%2C predicted to play a role in mitosis	NA	NA	NA	NA	NA	NA
DDB0232428	353117	ACGAACTTTTTCATCGGATC	1	GATCTACTCTTTTCCAAGAG	1	unique	GATC	DDB_G0267396	-	kif2	belongs to the NCD%2FKar3 subfamily%2C predicted to play a role in mitosis	NA	NA	NA	NA	NA	NA
DDB0232428	353220	AATATTTCATCATCAAGATC	1	GATCCTTTGTAACATCTTTC	1	unique	GATC	DDB_G0267396	-	kif2	belongs to the NCD%2FKar3 subfamily%2C predicted to play a role in mitosis	NA	NA	NA	NA	NA	NA
DDB0232428	353285	GGCTTTCAATGATGATGATC	1	GATCTAATCTCATGTTGTAA	1	unique	GATC	DDB_G0267396	-	kif2	belongs to the NCD%2FKar3 subfamily%2C predicted to play a role in mitosis	NA	NA	NA	NA	NA	NA
DDB0232428	353691	ACAGTTTGAGTGAATTGATC	1	GATCGATTTTATTCATTCTT	1	unique	GATC	DDB_G0267396	-	kif2	belongs to the NCD%2FKar3 subfamily%2C predicted to play a role in mitosis	NA	NA	NA	NA	NA	NA
DDB0232428	355224	TGAGAATTTAATAATAGATC	1	GATCAGTTGTTAAAACTGTT	1	unique	GATC	DDB_G0267568	-	gacO	NA	NA	NA	NA	NA	NA	NA
DDB0232428	355244	AGTTGTTAAAACTGTTGATC	1	GATCTTAAAAGACCAGGACT	1	unique	GATC	DDB_G0267568	-	gacO	NA	NA	NA	NA	NA	NA	NA
DDB0232428	355371	AGTACCTCTTTATTTTGATC	1	GATCTGGGATCAATGAGATG	1	unique	GATC	DDB_G0267568	-	gacO	NA	NA	NA	NA	NA	NA	NA
DDB0232428	355378	CTTTATTTTGATCTGGGATC	1	GATCAATGAGATGATACGTG	1	unique	GATC	DDB_G0267568	-	gacO	NA	NA	NA	NA	NA	NA	NA
DDB0232428	355509	CCAGCCAATACATGAGGATC	1	GATCCTGAGTATCCAATGAG	1	unique	GATC	DDB_G0267568	-	gacO	NA	NA	NA	NA	NA	NA	NA
DDB0232428	355983	CGTTCACGTTCTTCTTGATC	1	GATCACGTTTCTCTTTTAAC	1	unique	GATC	DDB_G0267568	-	gacO	NA	NA	NA	NA	NA	NA	NA
DDB0232428	356021	TGCAGACTTTGAAGCTGATC	1	GATCCTAAAATTTTATCATC	1	unique	GATC	DDB_G0267568	-	gacO	NA	NA	NA	NA	NA	NA	NA
DDB0232428	356367	TGACCCATTTGTTTTGGATC	1	GATCTAATGATGCTGATCTT	1	unique	GATC	DDB_G0267568	-	gacO	NA	NA	NA	NA	NA	NA	NA
DDB0232428	356381	TGGATCTAATGATGCTGATC	1	GATCTTGTTGGTACTGGTGG	1	unique	GATC	DDB_G0267568	-	gacO	NA	NA	NA	NA	NA	NA	NA
DDB0232428	356480	TGCACTATTAACAAATGATC	1	GATCCACTGTTGTTATTATT	1	unique	GATC	DDB_G0267568	-	gacO	NA	NA	NA	NA	NA	NA	NA
DDB0232428	360291	ATGAATTTTAATCTTGGATC	1	GATCAGCACGCATATTTAAA	1	unique	GATC	DDB_G0267570	-	DDB_G0267570	NA	NA	NA	NA	NA	NA	NA
DDB0232428	362266	CCCAATGTATCTTGATGATC	1	GATCTTGATAGGATGGATTA	1	unique	GATC	DDB_G0267572	-	DDB_G0267572	NA	NA	NA	NA	NA	NA	NA
DDB0232428	362527	CTAGTGCTACCCCAAAGATC	1	GATCAATTGATTGATTTTTT	1	unique	GATC	DDB_G0267572	-	DDB_G0267572	NA	NA	NA	NA	NA	NA	NA
DDB0232428	363160	AAAGTTTATTTGAGGTGATC	1	GATCAAAACAAAAGTAGAAA	1	unique	GATC	NA	NA	NA	NA	DDB_G0267572	DDB_G0268286	-	+	228	250
DDB0232428	363852	ATGGGCCACATCCTCAGATC	1	GATCCTGATGAATATTCAAT	1	unique	GATC	DDB_G0268286	+	DDB_G0268286	NA	NA	NA	NA	NA	NA	NA
DDB0232428	364323	TGAAATACCAAAATATGATC	1	GATCCACAAACAGTTTTAGA	1	unique	GATC	DDB_G0268286	+	DDB_G0268286	NA	NA	NA	NA	NA	NA	NA
DDB0232428	366003	ATTAATAAATTATGGAGATC	1	GATCTACAGCATTAAGACCA	1	unique	GATC	DDB_G0267574	+	DDB_G0267574	NA	NA	NA	NA	NA	NA	NA
DDB0232428	366026	AGCATTAAGACCATCAGATC	1	GATCCACCTTTATCGGCACG	1	unique	GATC	DDB_G0267574	+	DDB_G0267574	NA	NA	NA	NA	NA	NA	NA
DDB0232428	366212	TGAATGGGTTGGTTCTGATC	1	GATCCAAGACCTGATGATAT	1	unique	GATC	DDB_G0267574	+	DDB_G0267574	NA	NA	NA	NA	NA	NA	NA
DDB0232428	366493	AACAAAGATATCAGTTGATC	1	GATCAAATCATTGAAAAGTT	1	unique	GATC	DDB_G0267574	+	DDB_G0267574	NA	NA	NA	NA	NA	NA	NA
DDB0232428	366605	AATAATGCACCATTAAGATC	1	GATCTGGTGTTTGTAGTTTA	1	unique	GATC	DDB_G0267574	+	DDB_G0267574	NA	NA	NA	NA	NA	NA	NA
DDB0232428	367274	TTAGATTTTAGATTTAGATC	1	GATCAAAGAAATAATTTAAA	1	unique	GATC	DDB_G0267576	+	DDB_G0267576	NA	NA	NA	NA	NA	NA	NA
DDB0232428	368260	TTATGATTCAGAAAGGGATC	1	GATCAAAGAATAGGATATGA	1	unique	GATC	DDB_G0267578	+	DDB_G0267578	NA	NA	NA	NA	NA	NA	NA
DDB0232428	368335	CCCTCAAACTGATGTCGATC	1	GATCATTTATTTGGTGAAGA	1	unique	GATC	DDB_G0267578	+	DDB_G0267578	NA	NA	NA	NA	NA	NA	NA
DDB0232428	368353	TCATTTATTTGGTGAAGATC	1	GATCATTCCAAAGTTTTAAC	1	unique	GATC	DDB_G0267578	+	DDB_G0267578	NA	NA	NA	NA	NA	NA	NA
DDB0232428	368472	ATTTTAGTATATATTTGATC	1	GATCAATTAAAAAGGAATAT	1	unique	GATC	DDB_G0267578	+	DDB_G0267578	NA	NA	NA	NA	NA	NA	NA
DDB0232428	368568	TATTGTTTCTTTTAAAGATC	1	GATCTAGAAGATTATGTTAA	1	unique	GATC	DDB_G0267578	+	DDB_G0267578	NA	NA	NA	NA	NA	NA	NA
DDB0232428	369435	ATTCATACTGGTCCACGATC	1	GATCGTTTGAGGAAGTTAAA	1	unique	GATC	DDB_G0267580	+	DDB_G0267580	NA	NA	NA	NA	NA	NA	NA
DDB0232428	369918	AAGAGTAAATGGAAATGATC	1	GATCATCTTGTTACAAATAC	1	unique	GATC	DDB_G0267580	+	DDB_G0267580	NA	NA	NA	NA	NA	NA	NA
DDB0232428	370095	TACATTAAGAGAACATGATC	1	GATCGAAAGGTATTAAAAGA	1	unique	GATC	DDB_G0267580	+	DDB_G0267580	NA	NA	NA	NA	NA	NA	NA
DDB0232428	371944	TGGCGCAACATCATCTGATC	1	GATCATAAATCAGGTTTAGC	1	unique	GATC	DDB_G0267582	+	DDB_G0267582	NA	NA	NA	NA	NA	NA	NA
DDB0232428	372026	ATGCAAGGTCCAACAAGATC	1	GATCATTAGTATCTGATGTT	1	unique	GATC	DDB_G0267582	+	DDB_G0267582	NA	NA	NA	NA	NA	NA	NA
DDB0232428	372163	TGAAAATTCATATAGAGATC	1	GATCTTTTTGGTAAATAAAT	1	unique	GATC	DDB_G0267582	+	DDB_G0267582	NA	NA	NA	NA	NA	NA	NA
DDB0232428	372625	ATATTTTCGGTGAGAAGATC	1	GATCATTTACTCTGCAAGTC	1	unique	GATC	DDB_G0267582	+	DDB_G0267582	NA	NA	NA	NA	NA	NA	NA
DDB0232428	372686	ATTATTTTTGGTTTTCGATC	1	GATCACGCTCAACCATGGTT	1	unique	GATC	DDB_G0267582	+	DDB_G0267582	NA	NA	NA	NA	NA	NA	NA
DDB0232428	372757	TCTGTGTATTCAATGCGATC	1	GATCCCATTCGCTATGATGG	1	unique	GATC	DDB_G0267582	+	DDB_G0267582	NA	NA	NA	NA	NA	NA	NA
DDB0232428	373429	AAATCACCTTCGAAACGATC	1	GATCTTTAATTAATGGGAAA	1	unique	GATC	DDB_G0267584	-	adcE	NA	NA	NA	NA	NA	NA	NA
DDB0232428	373680	GAATAATTGTTTACTCGATC	1	GATCCAACAAATGTACGAAT	1	unique	GATC	DDB_G0267584	-	adcE	NA	NA	NA	NA	NA	NA	NA
DDB0232428	374293	TTCTTTTTTAAAGTTGGATC	1	GATCAGGTTCACTTTTAATT	1	unique	GATC	DDB_G0267584	-	adcE	NA	NA	NA	NA	NA	NA	NA
DDB0232428	374851	AAATTTAAAACCGCTTGATC	1	GATCATAAAGATTACATGCT	1	unique	GATC	DDB_G0267584	-	adcE	NA	NA	NA	NA	NA	NA	NA
DDB0232428	375856	TATTCATATGGAATTGGATC	1	GATCAGAATATCAATTAGGT	1	unique	GATC	DDB_G0267586	+	DDB_G0267586	NA	NA	NA	NA	NA	NA	NA
DDB0232428	375895	GGTGATAATCAGAATAGATC	1	GATCAGAACCAACTGAAATT	1	unique	GATC	DDB_G0267586	+	DDB_G0267586	NA	NA	NA	NA	NA	NA	NA
DDB0232428	376420	CAATTAGGTATTGGACGATC	1	GATCCAATAGTAATAATAAT	1	unique	GATC	DDB_G0267586	+	DDB_G0267586	NA	NA	NA	NA	NA	NA	NA
DDB0232428	376710	TATTTCAACTGGTTTTGATC	1	GATCATACAATTATAGAATT	1	unique	GATC	DDB_G0267586	+	DDB_G0267586	NA	NA	NA	NA	NA	NA	NA
DDB0232428	377501	CAATCTCTTTTAATTTGATC	1	GATCGATAAAAGATTGTTTC	1	unique	GATC	DDB_G0267588	-	pikI	NA	NA	NA	NA	NA	NA	NA
DDB0232428	377639	ACGACACTGCCCTTGAGATC	1	GATCATAACGTTCGTGAATC	1	unique	GATC	DDB_G0267588	-	pikI	NA	NA	NA	NA	NA	NA	NA
DDB0232428	378595	GAATGAGATACGTTTGGATC	1	GATCGAATTTTTCATCAAAT	1	unique	GATC	DDB_G0267588	-	pikI	NA	NA	NA	NA	NA	NA	NA
DDB0232428	379184	CGCTCAATGCTGCATTGATC	1	GATCGGTATTATTGGTATTT	1	unique	GATC	DDB_G0267588	-	pikI	NA	NA	NA	NA	NA	NA	NA
DDB0232428	379384	CTAATTGTGTTTGATTGATC	1	GATCCTGTAAAATTTTTTTT	1	unique	GATC	NA	NA	NA	NA	DDB_G0267588	DDB_G0267590	-	-	90	1645
DDB0232428	380229	GTTTATTTTTTTTTTAGATC	1	GATCAAAAGACACCCCTTTT	1	unique	GATC	NA	NA	NA	NA	DDB_G0267588	DDB_G0267590	-	-	935	800
DDB0232428	381085	AATCTATCATTTGCATGATC	1	GATCAACTTTATCAGTTATT	1	unique	GATC	DDB_G0267590	-	DDB_G0267590	NA	NA	NA	NA	NA	NA	NA
DDB0232428	381178	CTAATATCACCTAATAGATC	1	GATCAGAGATTTCATCTAAA	1	unique	GATC	DDB_G0267590	-	DDB_G0267590	NA	NA	NA	NA	NA	NA	NA
DDB0232428	381303	GAGGGAGCTTTGTTGAGATC	1	GATCTACCAGAGGAGGGAAT	1	unique	GATC	DDB_G0267590	-	DDB_G0267590	NA	NA	NA	NA	NA	NA	NA
DDB0232428	381419	CATTTGAACGTAAAACGATC	1	GATCTCATTGACAACGTTTT	1	unique	GATC	DDB_G0267590	-	DDB_G0267590	NA	NA	NA	NA	NA	NA	NA
DDB0232428	381560	AAGTGTAGGTCGAGATGATC	1	GATCTCGGTTCTGGGCTTCC	1	unique	GATC	DDB_G0267590	-	DDB_G0267590	NA	NA	NA	NA	NA	NA	NA
DDB0232428	381668	ATTTCTCCAATATGTCGATC	1	GATCTCAATGGGAGGTTCGT	1	unique	GATC	DDB_G0267590	-	DDB_G0267590	NA	NA	NA	NA	NA	NA	NA
DDB0232428	381708	TGGTCTGACCTGCAACGATC	1	GATCTATCCAAGGGGGCAAA	1	unique	GATC	DDB_G0267590	-	DDB_G0267590	NA	NA	NA	NA	NA	NA	NA
DDB0232428	381811	ATTCCTTTCAACAATCGATC	1	GATCGGATCTGTCGAGATTG	1	unique	GATC	DDB_G0267590	-	DDB_G0267590	NA	NA	NA	NA	NA	NA	NA
DDB0232428	381816	TTTCAACAATCGATCGGATC	1	GATCTGTCGAGATTGGCATG	1	unique	GATC	DDB_G0267590	-	DDB_G0267590	NA	NA	NA	NA	NA	NA	NA
DDB0232428	381866	TTGCCTCTATCCCATCGATC	1	GATCACCTCTGCCTGATAGG	1	unique	GATC	DDB_G0267590	-	DDB_G0267590	NA	NA	NA	NA	NA	NA	NA
DDB0232428	383245	AATCGCACACACTGTTGATC	1	GATCCTATCAAAAAAAAAAA	1	unique	GATC	NA	NA	NA	NA	DDB_G0267590	DDB_G0267592	-	+	613	371
DDB0232428	383510	AAAAAAAAAAATGATTGATC	2	GATCAGAATTTTGTGTAATT	1	unique_one	GATC	NA	NA	NA	NA	DDB_G0267590	DDB_G0267592	-	+	878	106
DDB0232428	384102	TTGGAGATTATTAATTGATC	1	GATCTTTACAGATTCTCAAA	1	unique	GATC	DDB_G0267592	+	DDB_G0267592	NA	NA	NA	NA	NA	NA	NA
DDB0232428	384463	GTTTCAAAAGTTGTTAGATC	1	GATCAAAGAATACTCAAGAT	1	unique	GATC	DDB_G0267592	+	DDB_G0267592	NA	NA	NA	NA	NA	NA	NA
DDB0232428	384684	TGCATATCTTCATAGTGATC	1	GATCCATTGTTAATGCCACG	1	unique	GATC	DDB_G0267592	+	DDB_G0267592	NA	NA	NA	NA	NA	NA	NA
DDB0232428	384894	TCGTGTCATTGAATATGATC	1	GATCATCCTTTGATTTGTCC	1	unique	GATC	DDB_G0267592	+	DDB_G0267592	NA	NA	NA	NA	NA	NA	NA
DDB0232428	385047	GGCTGCTCAATTAATTGATC	1	GATCCAAGTTTAAATAAACT	1	unique	GATC	DDB_G0267592	+	DDB_G0267592	NA	NA	NA	NA	NA	NA	NA
DDB0232428	386478	ATGATAATACCTAAATGATC	1	GATCGAAAATTTCTTCACAA	1	unique	GATC	DDB_G0268288	-	DDB_G0268288	NA	NA	NA	NA	NA	NA	NA
DDB0232428	386721	TCACCCATCTCTAAAAGATC	1	GATCAAAAATCTTTGAATCA	1	unique	GATC	DDB_G0268288	-	DDB_G0268288	NA	NA	NA	NA	NA	NA	NA
DDB0232428	386765	TCTATCAATTGTTAATGATC	1	GATCTTTGAAGTTTATTTCT	1	unique	GATC	DDB_G0268288	-	DDB_G0268288	NA	NA	NA	NA	NA	NA	NA
DDB0232428	387033	TTTGATTGACGATTTTGATC	1	GATCATCATAATTATTTGAA	1	unique	GATC	DDB_G0268288	-	DDB_G0268288	NA	NA	NA	NA	NA	NA	NA
DDB0232428	387869	TACTAAACCAAGTTTTGATC	1	GATCTACCTACTCTACCAAC	1	unique	GATC	DDB_G0268288	-	DDB_G0268288	NA	NA	NA	NA	NA	NA	NA
DDB0232428	388256	AAATACTTTTCCAAATGATC	1	GATCCCGAACCATTTCTATC	1	unique	GATC	DDB_G0268288	-	DDB_G0268288	NA	NA	NA	NA	NA	NA	NA
DDB0232428	388512	AAAACTATGAAACGAAGATC	1	GATCGCTGAACCATTTTCTC	1	unique	GATC	DDB_G0268288	-	DDB_G0268288	NA	NA	NA	NA	NA	NA	NA
DDB0232428	388740	TTGATTGAGTTTAATTGATC	1	GATCATTTGCCAATGCATTC	1	unique	GATC	DDB_G0268288	-	DDB_G0268288	NA	NA	NA	NA	NA	NA	NA
DDB0232428	388988	TTTATTATAACCCATTGATC	1	GATCTTAATACTCCACTCAA	1	unique	GATC	DDB_G0268288	-	DDB_G0268288	NA	NA	NA	NA	NA	NA	NA
DDB0232428	389670	TCATCATCGTCAAAGGGATC	1	GATCAAATGGTTTTGTTGAA	1	unique	GATC	DDB_G0268288	-	DDB_G0268288	NA	NA	NA	NA	NA	NA	NA
DDB0232428	390859	GAGATGATTTTAATTTGATC	1	GATCATTTTGAGAATCTAAA	1	unique	GATC	DDB_G0267596	-	DDB_G0267596	NA	NA	NA	NA	NA	NA	NA
DDB0232428	391191	GATAAAGTAATAATTTGATC	1	GATCCAATGAAATGTTTAAT	1	unique	GATC	DDB_G0267596	-	DDB_G0267596	NA	NA	NA	NA	NA	NA	NA
DDB0232428	391356	CTCAGTTATCAAATCCGATC	1	GATCTATACGTAACAGTGGG	1	unique	GATC	DDB_G0267596	-	DDB_G0267596	NA	NA	NA	NA	NA	NA	NA
DDB0232428	391890	CTTTAATGAATCTAATGATC	1	GATCCTAAATAATTAATTAA	1	unique	GATC	DDB_G0267596	-	DDB_G0267596	NA	NA	NA	NA	NA	NA	NA
DDB0232428	392026	TAGCCATCATCATCATGATC	1	GATCATTATTTTCATCTTCT	1	unique	GATC	DDB_G0267596	-	DDB_G0267596	NA	NA	NA	NA	NA	NA	NA
DDB0232428	392640	ATTGAATTGGGGTGATGATC	1	GATCTTCTAGTGAGTGGAGT	1	unique	GATC	DDB_G0267596	-	DDB_G0267596	NA	NA	NA	NA	NA	NA	NA
DDB0232428	393508	ATATCATTTGTTGCATGATC	1	GATCATGGTCATCATCATCA	1	unique	GATC	DDB_G0267596	-	DDB_G0267596	NA	NA	NA	NA	NA	NA	NA
DDB0232428	393652	ATATCATTTGTTGTATGATC	1	GATCATCATAGTGGTCATCA	1	unique	GATC	DDB_G0267596	-	DDB_G0267596	NA	NA	NA	NA	NA	NA	NA
DDB0232428	393712	ATATCATTTATTGTATGATC	1	GATCATCATCGTGGTCGTCA	1	unique	GATC	DDB_G0267596	-	DDB_G0267596	NA	NA	NA	NA	NA	NA	NA
DDB0232428	393910	GTATCGTTTATTATAGGATC	1	GATCTTCTATATCACCTGCT	1	unique	GATC	DDB_G0267596	-	DDB_G0267596	NA	NA	NA	NA	NA	NA	NA
DDB0232428	394840	TTTTTATTAGTGATTTGATC	1	GATCATTTTGAAAGTCAATA	1	unique	GATC	DDB_G0267596	-	DDB_G0267596	NA	NA	NA	NA	NA	NA	NA
DDB0232428	395349	ATTATTATTTAAAGAAGATC	1	GATCTTCTTGTAATTGTTGA	1	unique	GATC	DDB_G0267596	-	DDB_G0267596	NA	NA	NA	NA	NA	NA	NA
DDB0232428	395574	ATTTTTGCTTGGAGTTGATC	1	GATCTTTTGACCATTATAAT	1	unique	GATC	DDB_G0267596	-	DDB_G0267596	NA	NA	NA	NA	NA	NA	NA
DDB0232428	395924	TCCATTTGAAAGATTTGATC	1	GATCAATATTCATTTGTAAA	1	unique	GATC	DDB_G0267598	-	DDB_G0267598	might be involved in fatty acid metabolism	NA	NA	NA	NA	NA	NA
DDB0232428	395993	GATGTCGGACATAATTGATC	1	GATCTAATAGTATAGATAAT	1	unique	GATC	DDB_G0267598	-	DDB_G0267598	might be involved in fatty acid metabolism	NA	NA	NA	NA	NA	NA
DDB0232428	396465	TATTAGAGAAACATAAGATC	1	GATCCTATGTAGTAGTAGTA	1	unique	GATC	DDB_G0267598	-	DDB_G0267598	might be involved in fatty acid metabolism	NA	NA	NA	NA	NA	NA
DDB0232428	396646	AATGTATGAATTAAATGATC	1	GATCCATTGCATATTCTACT	1	unique	GATC	DDB_G0267598	-	DDB_G0267598	might be involved in fatty acid metabolism	NA	NA	NA	NA	NA	NA
DDB0232428	397220	TTTTTATGACGATAATGATC	1	GATCGGAAATTAAAAAAAAA	1	unique	GATC	NA	NA	NA	NA	DDB_G0267598	DDB_G0268290	-	-	196	349
DDB0232428	399463	ACAAATTTAGTTTCCGGATC	1	GATCATTATTATATTCATTT	1	unique	GATC	DDB_G0267600	-	DDB_G0267600	similar to HIBCH%2C might have 3-hydroxyisobutyryl-Coenzyme A hydrolase activity	NA	NA	NA	NA	NA	NA
DDB0232428	399878	AAAAAATAATATATTAGATC	1	GATCCTACCAACAGGATTTT	1	unique	GATC	NA	NA	NA	NA	DDB_G0267600	DDB_G0267602	-	-	373	472
DDB0232428	401140	AATGAAGAAATAAATTGATC	1	GATCTAATCAAAGAGAATGC	1	unique	GATC	DDB_G0267602	-	DDB_G0267602	NA	NA	NA	NA	NA	NA	NA
DDB0232428	401368	TTCAATTAAAAAGTATGATC	1	GATCTTTTACCAATTTCAAT	1	unique	GATC	DDB_G0267602	-	DDB_G0267602	NA	NA	NA	NA	NA	NA	NA
DDB0232428	401555	GGTATTAATTGACCTTGATC	1	GATCATTATTTTCTAAATAA	1	unique	GATC	DDB_G0267602	-	DDB_G0267602	NA	NA	NA	NA	NA	NA	NA
DDB0232428	401654	AAATTTATAACACCCTGATC	1	GATCAAAAATTTCTAAATTT	1	unique	GATC	DDB_G0267602	-	DDB_G0267602	NA	NA	NA	NA	NA	NA	NA
DDB0232428	401900	ATGGTAGTATTTGATGGATC	1	GATCATAACATGGTTTTATA	1	unique	GATC	DDB_G0267602	-	DDB_G0267602	NA	NA	NA	NA	NA	NA	NA
DDB0232428	402304	TAAATAACCACCTGGTGATC	1	GATCTATCAATACCATAACA	1	unique	GATC	DDB_G0267602	-	DDB_G0267602	NA	NA	NA	NA	NA	NA	NA
DDB0232428	402416	TGTTCGCAAGTGGTTTGATC	1	GATCTATAAATGTTAAATTG	1	unique	GATC	DDB_G0267602	-	DDB_G0267602	NA	NA	NA	NA	NA	NA	NA
DDB0232428	402578	TAATTAAAATAATATTGATC	1	GATCATCACATTTACCAGAG	1	unique	GATC	DDB_G0267602	-	DDB_G0267602	NA	NA	NA	NA	NA	NA	NA
DDB0232428	402698	TTACAATAAGTACATTGATC	1	GATCATATGAAAAATCACCA	1	unique	GATC	DDB_G0267602	-	DDB_G0267602	NA	NA	NA	NA	NA	NA	NA
DDB0232428	403010	AATTTATCATTACTATGATC	1	GATCTTGTTTATAACAAACA	1	unique	GATC	DDB_G0267602	-	DDB_G0267602	NA	NA	NA	NA	NA	NA	NA
DDB0232428	403100	TAACAATTTCTAATTGGATC	1	GATCAGTACAATCACCACAG	1	unique	GATC	DDB_G0267602	-	DDB_G0267602	NA	NA	NA	NA	NA	NA	NA
DDB0232428	403325	ATTGATGGTGTAGTTTGATC	1	GATCTAAACCAATAACCAAT	1	unique	GATC	DDB_G0267602	-	DDB_G0267602	NA	NA	NA	NA	NA	NA	NA
DDB0232428	403865	CATTTTTCATTCATTTGATC	1	GATCGTTATTTACACCATTG	1	unique	GATC	DDB_G0267602	-	DDB_G0267602	NA	NA	NA	NA	NA	NA	NA
DDB0232428	407379	GTTGCCGATAGGCAAAGATC	1	GATCCCTATCCTTAATCCAA	1	unique	GATC	DDB_G0267604	-	mserS	catalyzes the reaction ATP %2B L-serine %2B tRNASer %3D AMP %2B diphosphate %2B L-seryl-tRNASer	NA	NA	NA	NA	NA	NA
DDB0232428	407597	GGTGGTCTTTGAAGCCGATC	1	GATCGAATCACTCCTAAACT	1	unique	GATC	DDB_G0267604	-	mserS	catalyzes the reaction ATP %2B L-serine %2B tRNASer %3D AMP %2B diphosphate %2B L-seryl-tRNASer	NA	NA	NA	NA	NA	NA
DDB0232428	407634	TCACCCAACTCTAAATGATC	1	GATCTTTAATTGGTTCATCT	1	unique	GATC	DDB_G0267604	-	mserS	catalyzes the reaction ATP %2B L-serine %2B tRNASer %3D AMP %2B diphosphate %2B L-seryl-tRNASer	NA	NA	NA	NA	NA	NA
DDB0232428	407767	TCAAAGCTTCACTTGTGATC	1	GATCTCATTGAAGTATATAT	1	unique	GATC	DDB_G0267604	-	mserS	catalyzes the reaction ATP %2B L-serine %2B tRNASer %3D AMP %2B diphosphate %2B L-seryl-tRNASer	NA	NA	NA	NA	NA	NA
DDB0232428	409240	GAAATTGAAAGATTAGGATC	1	GATCTAAATTTAAAGTTGCA	1	unique	GATC	DDB_G0267606	+	fcf1	NA	NA	NA	NA	NA	NA	NA
DDB0232428	409376	ATTTAGAATTTCAAAAGATC	1	GATCCAAGATTCCAAAGATT	1	unique	GATC	DDB_G0267606	+	fcf1	NA	NA	NA	NA	NA	NA	NA
DDB0232428	409834	ATGAATGAATAAGTTTGATC	1	GATCTTCATTGATACATGTA	1	unique	GATC	DDB_G0267608	-	DDB_G0267608	NA	NA	NA	NA	NA	NA	NA
DDB0232428	411865	TGATAAAAATGAACAAGATC	1	GATCAAAGATATGAATGAAA	1	unique	GATC	DDB_G0267610	-	DDB_G0267610	there is a paralog of this gene%2C %3Ca href%3D%22%2Fdb%2Fcgi-bin%2Fgene_page.pl?primary_id%3DDDB_G0287085%22%3EDDB_G0287085 %3C%2Fa%3E	NA	NA	NA	NA	NA	NA
DDB0232428	412395	TCCTAATGAAATTTCTGATC	1	GATCCAATAAATCCACTTGA	1	unique	GATC	DDB_G0267610	-	DDB_G0267610	there is a paralog of this gene%2C %3Ca href%3D%22%2Fdb%2Fcgi-bin%2Fgene_page.pl?primary_id%3DDDB_G0287085%22%3EDDB_G0287085 %3C%2Fa%3E	NA	NA	NA	NA	NA	NA
DDB0232428	414924	TTTTATTTAAACCAAAGATC	1	GATCAAAAATTTTTTTTTTT	6	unique_one	GATC	NA	NA	NA	NA	DDB_G0267612	DDB_G0267380	+	+	644	56
DDB0232428	415331	AGAACAAGTTCACTGTGATC	1	GATCCAGTAAACTATCCAAA	1	unique	GATC	DDB_G0267380	+	argE	NA	NA	NA	NA	NA	NA	NA
DDB0232428	415546	TTTTTTTTTTAATTTAGATC	1	GATCCATTCCAATTAATTAT	1	unique	GATC	DDB_G0267380	+	argE	NA	NA	NA	NA	NA	NA	NA
DDB0232428	415744	TGGTGTCGATGCATTAGATC	1	GATCATAGTGGAAAGATGAA	1	unique	GATC	DDB_G0267380	+	argE	NA	NA	NA	NA	NA	NA	NA
DDB0232428	416392	TCTTCCTTTGGTTCGTGATC	1	GATCTCCAAGATAGTGGTTT	1	unique	GATC	DDB_G0267380	+	argE	NA	NA	NA	NA	NA	NA	NA
DDB0232428	416811	TATTGACAAGTTATTTGATC	1	GATCACCAAAACATGAAACA	1	unique	GATC	DDB_G0268292	-	DDB_G0268292	NA	NA	NA	NA	NA	NA	NA
DDB0232428	417444	TACATTAAATAAAAATGATC	1	GATCTATTTTCAGTATAATT	1	unique	GATC	DDB_G0268292	-	DDB_G0268292	NA	NA	NA	NA	NA	NA	NA
DDB0232428	417673	GATGTTTGAAAAAATGGATC	1	GATCACCTATATAATCATAA	1	unique	GATC	DDB_G0268292	-	DDB_G0268292	NA	NA	NA	NA	NA	NA	NA
DDB0232428	418506	TCATATATGGAGATTTGATC	1	GATCAATAGATTTTTTTTAA	1	unique	GATC	NA	NA	NA	NA	DDB_G0268292	DDB_G0267614	-	-	728	1602
DDB0232428	419127	ATTTTCTTATGATTATGATC	1	GATCATGTATCTATCCAATT	1	unique	GATC	NA	NA	NA	NA	DDB_G0268292	DDB_G0267614	-	-	1349	981
DDB0232428	419521	TAACAGTAGTCAAGTTGATC	1	GATCAGAGAAAGAACAACCA	1	unique	GATC	NA	NA	NA	NA	DDB_G0268292	DDB_G0267614	-	-	1743	587
DDB0232428	419797	ATATATATACCATATTGATC	1	GATCTCATAACTACATGGGC	1	unique	GATC	NA	NA	NA	NA	DDB_G0268292	DDB_G0267614	-	-	2019	311
DDB0232428	420404	ATAACTCCATTTGGTTGATC	1	GATCAGTTCCACATGTTGAA	1	unique	GATC	DDB_G0267614	-	DDB_G0267614	NA	NA	NA	NA	NA	NA	NA
DDB0232428	423301	TTTAAAAAATTCCCATGATC	1	GATCATACATAAGGTCTCTT	1	unique	GATC	NA	NA	NA	NA	DDB_G0267614	DDB_G0267454	-	+	1927	706
DDB0232428	424392	AATAAATAAATCAAATGATC	1	GATCAAAAAAAAAAAAAAAA	134	unique_one	GATC	DDB_G0267454	+	ancA	ortholog of human SLC25A4%2C which catalyzes the exchange of ADP and ATP across the mitochondrial inner membrane%3B contains six predicted transmembrane domains %3Cbr%2F%3E%3Cbr%2F%3E%3Cb%3ECommunity annotation:%3C%2Fb%3E Overview of the %3Ca href%3D%22http:%2F%2Fwiki.dictybase.org%2Fdictywiki%2Findex.php%2FMitochondrial_Carrier_Family_%2528MCF%2529%22%3EMitochondrial Carrier Family (MCF)%3C%2Fa%…	NA	NA	NA	NA	NA	NA
DDB0232428	425706	ATTCCCTCCATATTCCGATC	1	GATCGATTTATTTTATTTTT	1	unique	GATC	NA	NA	NA	NA	DDB_G0267454	DDB_G0268294	+	-	188	410
DDB0232428	426590	TACATACAATTTCAATGATC	2	GATCTTAAATCATATTGATT	3	not_unique	GATC	DDB_G0268294	-	DDB_G0268294_ps	putative pseudogene%3B fragment%2C nearly identical to %3Ca href%3D%22%2Fgene%2FDDB_G0291065%22%3EDDB_G0291065%3C%2Fa%3E%2C %3Ca href%3D%22%2Fgene%2FDDB_G0290815%22%3EDDB_G0290815%3C%2Fa%3E	NA	NA	NA	NA	NA	NA
DDB0232428	428111	CGATTATAATATGAGAGATC	1	GATCAAAACCAGGTATCTCC	1	unique	GATC	DDB_G0267616	+	DDB_G0267616	NA	NA	NA	NA	NA	NA	NA
DDB0232428	428159	ATTCAGTCAAGTGAATGATC	2	GATCTTCTATTTTCAAGTAT	1	unique_one	GATC	DDB_G0267616	+	DDB_G0267616	NA	NA	NA	NA	NA	NA	NA
DDB0232428	428774	TATTGATTTTTCATCAGATC	1	GATCCAAATTTTCCAAGCTA	1	unique	GATC	DDB_G0267616	+	DDB_G0267616	NA	NA	NA	NA	NA	NA	NA
DDB0232428	428877	AAAAATATTATTGCTGGATC	1	GATCCTCTCAGTATAACTTG	1	unique	GATC	DDB_G0267616	+	DDB_G0267616	NA	NA	NA	NA	NA	NA	NA
DDB0232428	429092	AAGAAGTGCCTCAAAAGATC	2	GATCATTCAAAGTTCATGTA	2	not_unique	GATC	DDB_G0267616	+	DDB_G0267616	NA	NA	NA	NA	NA	NA	NA
DDB0232428	429533	CTTTTCTTGGATAAAGGATC	1	GATCAATTGAACATCCAAAA	2	unique_one	GATC	DDB_G0267616	+	DDB_G0267616	NA	NA	NA	NA	NA	NA	NA
DDB0232428	430130	TCATGAAACTTGTGTTGATC	2	GATCAACTTATATTTTGCTT	2	not_unique	GATC	DDB_G0267616	+	DDB_G0267616	NA	NA	NA	NA	NA	NA	NA
DDB0232428	430289	ATGCACAAAACTTTTTGATC	1	GATCATTACATTCTAATACC	1	unique	GATC	DDB_G0267616	+	DDB_G0267616	NA	NA	NA	NA	NA	NA	NA
DDB0232428	430433	ATTGATGAATTGATGGGATC	1	GATCTCAGGCCATGACTGAT	2	unique_one	GATC	DDB_G0267616	+	DDB_G0267616	NA	NA	NA	NA	NA	NA	NA
DDB0232428	430742	GGATTTGATGAAGGATGATC	1	GATCCAGATTTATCATTATA	1	unique	GATC	DDB_G0268484	-	DDB_G0268484_ps	putative pseudogene%3B fragment%2C similar to %3Ca href%3D%22%2Fgene%2FDDB_G0291065%22%3EDDB_G0291065%3C%2Fa%3E%2C %3Ca href%3D%22%2Fgene%2FDDB_G0290815%22%3EDDB_G0290815%3C%2Fa%3E	NA	NA	NA	NA	NA	NA
DDB0232428	431409	TCAATTGTAAAGATACGATC	3	GATCATTATGATTAATTGAG	3	not_unique	GATC	DDB_G0268484	-	DDB_G0268484_ps	putative pseudogene%3B fragment%2C similar to %3Ca href%3D%22%2Fgene%2FDDB_G0291065%22%3EDDB_G0291065%3C%2Fa%3E%2C %3Ca href%3D%22%2Fgene%2FDDB_G0290815%22%3EDDB_G0290815%3C%2Fa%3E	NA	NA	NA	NA	NA	NA
DDB0232428	432383	TTTCTATAAATTATCTGATC	1	GATCAGTTTCTTTTTATATT	1	unique	GATC	NA	NA	NA	NA	DDB_G0268484	DDB_G0267618	-	+	609	1445
DDB0232428	433528	TTTTTTTTTTTCTTTTGATC	2	GATCTTTTTCTTTATCAGAG	1	unique_one	GATC	NA	NA	NA	NA	DDB_G0268484	DDB_G0267618	-	+	1754	300
DDB0232428	434820	AAAAATATTAAATATAGATC	1	GATCAATTATTAATAAAAGA	1	unique	GATC	DDB_G0267618	+	DDB_G0267618_ps	putative pseudogene%3B fragment%3B similar to D. discoideum gene %3Ca href%3D%22%2Fgene%2FDDB_G0268494%22%3EDDB_G0268494%3C%2Fa%3E	NA	NA	NA	NA	NA	NA
DDB0232428	436837	ACCTTGTAAATAATTTGATC	1	GATCTGCCATCTTCCATACC	1	unique	GATC	DDB_G0267620	-	DDB_G0267620	NA	NA	NA	NA	NA	NA	NA
DDB0232428	438281	AATAAAGAATTAATTTGATC	1	GATCTATCCTTTTGAAATCA	1	unique	GATC	DDB_G0267622	-	srp9	component of the signal recognition particle (SRP)%2C which ensures correct targeting of nascent secretory proteins to the endoplasmic reticulum	NA	NA	NA	NA	NA	NA
DDB0232428	438550	ATAAATACCCTTTTTGGATC	1	GATCAGTTCTATATAATTGC	1	unique	GATC	DDB_G0267622	-	srp9	component of the signal recognition particle (SRP)%2C which ensures correct targeting of nascent secretory proteins to the endoplasmic reticulum	NA	NA	NA	NA	NA	NA
DDB0232428	439508	TTTTAGGTATCAATTAGATC	2	GATCAGGTGGTCATTCAGCA	2	not_unique	GATC	DDB_G0267624	+	DDB_G0267624	NA	NA	NA	NA	NA	NA	NA
DDB0232428	439730	GTTGTATTAGGTGGTGGATC	1	GATCAAATTACTTTGGTGGT	2	unique_one	GATC	DDB_G0267624	+	DDB_G0267624	NA	NA	NA	NA	NA	NA	NA
DDB0232428	439843	AAAGAATAAATATAGTGATC	1	GATCTCTATTGGGCATTGGC	1	unique	GATC	DDB_G0267624	+	DDB_G0267624	NA	NA	NA	NA	NA	NA	NA
DDB0232428	440575	TAATAACACTGAAAATGATC	3	GATCCATTATTCTCTGGTCT	2	not_unique	GATC	DDB_G0267624	+	DDB_G0267624	NA	NA	NA	NA	NA	NA	NA
DDB0232428	440740	AATTAAAGGAAAATATGATC	2	GATCCAAATAATTATTTTAA	3	not_unique	GATC	DDB_G0267624	+	DDB_G0267624	NA	NA	NA	NA	NA	NA	NA
DDB0232428	441385	AATAAAAAAGAAAAAAGATC	1	GATCAGATTTTTCTAGTGAT	1	unique	GATC	NA	NA	NA	NA	DDB_G0267624	DDB_G0267628	+	-	595	294
DDB0232428	441402	ATCAGATTTTTCTAGTGATC	1	GATCATTTTTTTTTTTTTTT	24	unique_one	GATC	NA	NA	NA	NA	DDB_G0267624	DDB_G0267628	+	-	612	277
DDB0232428	441659	TTTGAAGGGTAATAATGATC	1	GATCAAATGCTCCATCAAAT	2	unique_one	GATC	NA	NA	NA	NA	DDB_G0267624	DDB_G0267628	+	-	869	20
DDB0232428	441693	ATACTCTATAAATTTTGATC	1	GATCAAAATTACCACCAACT	1	unique	GATC	DDB_G0267628	-	rad54_ps	putative pseudogene%3B fragment similar to%2C %3Ca href%3D%22%2Fgene%2FDDB_G0282997%22%3Erad54%3C%2Fa%3E	NA	NA	NA	NA	NA	NA
DDB0232428	442116	CTCTGGTTAAGAGTTGGATC	1	GATCATTATAAATTTTAACA	1	unique	GATC	DDB_G0267628	-	rad54_ps	putative pseudogene%3B fragment similar to%2C %3Ca href%3D%22%2Fgene%2FDDB_G0282997%22%3Erad54%3C%2Fa%3E	NA	NA	NA	NA	NA	NA
DDB0232428	444516	AGAATTCAATTTGGTTGATC	1	GATCCTTTTTACACTTTACA	1	unique	GATC	DDB_G0267630	+	kil1	necessary for efficient intracellular killing of K. pneumoniae%3B overexpression of kil1%2C a sulfotransferase%2C restores the ability of %3Ca href%3D%22%2Fdb%2Fcgi-bin%2Fgene_page.pl?primary_id%3DDDB_G0267444%22%3E%3Ci%3Ephg1a%3C%2Fi%3E%3C%2Fa%3E mutants to grow on K. pneumoniae	NA	NA	NA	NA	NA	NA
DDB0232428	444828	AAATGTTGTACAACATGATC	1	GATCCAATGAATCAAGAAAT	1	unique	GATC	DDB_G0267630	+	kil1	necessary for efficient intracellular killing of K. pneumoniae%3B overexpression of kil1%2C a sulfotransferase%2C restores the ability of %3Ca href%3D%22%2Fdb%2Fcgi-bin%2Fgene_page.pl?primary_id%3DDDB_G0267444%22%3E%3Ci%3Ephg1a%3C%2Fi%3E%3C%2Fa%3E mutants to grow on K. pneumoniae	NA	NA	NA	NA	NA	NA
DDB0232428	446002	CTCATATGCGATACTTGATC	1	GATCCCATGGATACACCAAC	1	unique	GATC	DDB_G0267632	-	DDB_G0267632	NA	NA	NA	NA	NA	NA	NA
DDB0232428	446129	TCACCAACACCAACATGATC	1	GATCATAAATACAAATTGAA	1	unique	GATC	DDB_G0267632	-	DDB_G0267632	NA	NA	NA	NA	NA	NA	NA
DDB0232428	450257	ATTAAATTATTTAAATGATC	1	GATCCAATTTTAGATTTTAA	1	unique	GATC	DDB_G0267634	+	DDB_G0267634	NA	NA	NA	NA	NA	NA	NA
DDB0232428	450872	TTTAATAATTTCTGAAGATC	1	GATCAAAATTATTTTAAAAA	1	unique	GATC	DDB_G0267634	+	DDB_G0267634	NA	NA	NA	NA	NA	NA	NA
DDB0232428	451034	TACAAATTCATTTATGGATC	1	GATCAATTTGAATTAACATT	1	unique	GATC	DDB_G0267634	+	DDB_G0267634	NA	NA	NA	NA	NA	NA	NA
DDB0232428	453779	AATTGAAAAAGTTTTTGATC	1	GATCTTCTTCTTCTGTCCAT	1	unique	GATC	DDB_G0267636	-	mybM	contains three Myb DNA-binding domains	NA	NA	NA	NA	NA	NA
DDB0232428	453808	TGTCCATTTATTTGGTGATC	1	GATCTTCTAATACCATTTTG	1	unique	GATC	DDB_G0267636	-	mybM	contains three Myb DNA-binding domains	NA	NA	NA	NA	NA	NA
DDB0232428	454024	TCATCCATTAATGAAGGATC	1	GATCATTATAGATTCTATCA	1	unique	GATC	DDB_G0267636	-	mybM	contains three Myb DNA-binding domains	NA	NA	NA	NA	NA	NA
DDB0232428	457530	AAAAATTTCGACCAATGATC	1	GATCATACTCGATAATGATG	1	unique	GATC	NA	NA	NA	NA	DDB_G0267636	DDB_G0267638	-	+	3428	7462
DDB0232428	457627	ATATTATTTTTGTAAAGATC	1	GATCACCACTACCATTTATT	1	unique	GATC	NA	NA	NA	NA	DDB_G0267636	DDB_G0267638	-	+	3525	7365
DDB0232428	459376	TATGTCTTTTCGAAATGATC	1	GATCAAAAGAAATATCTAAA	1	unique	GATC	NA	NA	NA	NA	DDB_G0267636	DDB_G0267638	-	+	5274	5616
DDB0232428	459750	GTGCAAGTGGAAATGAGATC	1	GATCTTTATTGTTTATTTAT	1	unique	GATC	NA	NA	NA	NA	DDB_G0267636	DDB_G0267638	-	+	5648	5242
DDB0232428	462760	GTACAGTGGGTGGGACGATC	1	GATCATTCAGAAAAGAAAAA	1	unique	GATC	NA	NA	NA	NA	DDB_G0267636	DDB_G0267638	-	+	8658	2232
DDB0232428	463138	AAAAAAAAAAATTTTTGATC	6	GATCAAGATATTTTTTGTTT	1	unique_one	GATC	NA	NA	NA	NA	DDB_G0267636	DDB_G0267638	-	+	9036	1854
DDB0232428	465031	AAAAGAGAAAATAACGGATC	1	GATCCTATAGTTACAGATGA	1	unique	GATC	DDB_G0267638	+	DDB_G0267638	chromatin remodeling complex subunit R (CHR) protein%3B SWI2%2FSNF2 homolog	NA	NA	NA	NA	NA	NA
DDB0232428	465173	ACACCTAGACAAACTAGATC	1	GATCATCATTATCATTATCA	2	unique_one	GATC	DDB_G0267638	+	DDB_G0267638	chromatin remodeling complex subunit R (CHR) protein%3B SWI2%2FSNF2 homolog	NA	NA	NA	NA	NA	NA
DDB0232428	465251	AATAGTAGTAAAAAGCGATC	1	GATCTCGATCCAATAGTACA	1	unique	GATC	DDB_G0267638	+	DDB_G0267638	chromatin remodeling complex subunit R (CHR) protein%3B SWI2%2FSNF2 homolog	NA	NA	NA	NA	NA	NA
DDB0232428	465257	AGTAAAAAGCGATCTCGATC	1	GATCCAATAGTACATCAAAG	1	unique	GATC	DDB_G0267638	+	DDB_G0267638	chromatin remodeling complex subunit R (CHR) protein%3B SWI2%2FSNF2 homolog	NA	NA	NA	NA	NA	NA
DDB0232428	465625	ATCACTTTTAAATTTAGATC	1	GATCAGGATAAATTACAATT	1	unique	GATC	DDB_G0267638	+	DDB_G0267638	chromatin remodeling complex subunit R (CHR) protein%3B SWI2%2FSNF2 homolog	NA	NA	NA	NA	NA	NA
DDB0232428	466516	TCCAAAAGTTCACTGGGATC	1	GATCATTTATTGGAAGAGAT	1	unique	GATC	DDB_G0267638	+	DDB_G0267638	chromatin remodeling complex subunit R (CHR) protein%3B SWI2%2FSNF2 homolog	NA	NA	NA	NA	NA	NA
DDB0232428	466915	TTTATTAAATCAATTTGATC	1	GATCATGATGTTGATGAAGA	1	unique	GATC	DDB_G0267638	+	DDB_G0267638	chromatin remodeling complex subunit R (CHR) protein%3B SWI2%2FSNF2 homolog	NA	NA	NA	NA	NA	NA
DDB0232428	467116	ATTATTAAAAAAACTTGATC	1	GATCAAGAAAAATCAGATAA	1	unique	GATC	DDB_G0267638	+	DDB_G0267638	chromatin remodeling complex subunit R (CHR) protein%3B SWI2%2FSNF2 homolog	NA	NA	NA	NA	NA	NA
DDB0232428	467674	CTCGATGGTGATGTCTGATC	1	GATCATTTAATATTTCGTAG	1	unique	GATC	DDB_G0267638	+	DDB_G0267638	chromatin remodeling complex subunit R (CHR) protein%3B SWI2%2FSNF2 homolog	NA	NA	NA	NA	NA	NA
DDB0232428	467925	ATCCTGTCACTGGTATGATC	1	GATCGAGGGTGGTGATGATG	1	unique	GATC	DDB_G0267638	+	DDB_G0267638	chromatin remodeling complex subunit R (CHR) protein%3B SWI2%2FSNF2 homolog	NA	NA	NA	NA	NA	NA
DDB0232428	468196	AGTTTGTAATCATCCAGATC	1	GATCTATTTGAAATTAGACC	1	unique	GATC	DDB_G0267638	+	DDB_G0267638	chromatin remodeling complex subunit R (CHR) protein%3B SWI2%2FSNF2 homolog	NA	NA	NA	NA	NA	NA
DDB0232428	468799	GAGTGTAAAGATAACTGATC	1	GATCCAATTAGGGATTGGTT	1	unique	GATC	DDB_G0267638	+	DDB_G0267638	chromatin remodeling complex subunit R (CHR) protein%3B SWI2%2FSNF2 homolog	NA	NA	NA	NA	NA	NA
DDB0232428	469324	CGAGAGATTCAATACAGATC	1	GATCCAAAGATATTCCTATT	1	unique	GATC	DDB_G0267638	+	DDB_G0267638	chromatin remodeling complex subunit R (CHR) protein%3B SWI2%2FSNF2 homolog	NA	NA	NA	NA	NA	NA
DDB0232428	469358	TTCATTCTATCGACTAGATC	1	GATCAGGTGGTTTAGGTTTA	1	unique	GATC	DDB_G0267638	+	DDB_G0267638	chromatin remodeling complex subunit R (CHR) protein%3B SWI2%2FSNF2 homolog	NA	NA	NA	NA	NA	NA
DDB0232428	470431	CCAAGACCAAGATAAAGATC	1	GATCAAGAAATGAAAATAAT	1	unique	GATC	DDB_G0267638	+	DDB_G0267638	chromatin remodeling complex subunit R (CHR) protein%3B SWI2%2FSNF2 homolog	NA	NA	NA	NA	NA	NA
DDB0232428	470740	TAAATTAATATCACCAGATC	1	GATCATAATTTTAGGAAGAA	1	unique	GATC	DDB_G0267638	+	DDB_G0267638	chromatin remodeling complex subunit R (CHR) protein%3B SWI2%2FSNF2 homolog	NA	NA	NA	NA	NA	NA
DDB0232428	471067	CTTTCAACAAGTTCCAGATC	1	GATCCAGATATTGAACAATG	1	unique	GATC	DDB_G0267638	+	DDB_G0267638	chromatin remodeling complex subunit R (CHR) protein%3B SWI2%2FSNF2 homolog	NA	NA	NA	NA	NA	NA
DDB0232428	471145	TGAACAAGTATTAAAGGATC	1	GATCAAGATGAATATTATCG	1	unique	GATC	DDB_G0267638	+	DDB_G0267638	chromatin remodeling complex subunit R (CHR) protein%3B SWI2%2FSNF2 homolog	NA	NA	NA	NA	NA	NA
DDB0232428	472187	ATTAATCGTGTAACCAGATC	1	GATCAAAATCTCAAATTTCT	1	unique	GATC	DDB_G0267638	+	DDB_G0267638	chromatin remodeling complex subunit R (CHR) protein%3B SWI2%2FSNF2 homolog	NA	NA	NA	NA	NA	NA
DDB0232428	472279	TAAATCACCAATTGGTGATC	1	GATCAACAACAACAACAACA	51	unique_one	GATC	DDB_G0267638	+	DDB_G0267638	chromatin remodeling complex subunit R (CHR) protein%3B SWI2%2FSNF2 homolog	NA	NA	NA	NA	NA	NA
DDB0232428	474747	ACTCCTTTATATAAAAGATC	1	GATCTATTTTACAAAAATAA	1	unique	GATC	NA	NA	NA	NA	DDB_G0267638	DDB_G0268300	+	+	241	887
DDB0232428	476849	ACTATCAGTTGGACTAGATC	1	GATCCTGAATCAGATAATGT	1	unique	GATC	DDB_G0267640	-	gtaE	has 18 amino acids between the two CX2C motifs	NA	NA	NA	NA	NA	NA
DDB0232428	477330	GGAACATAAGGATTTTGATC	1	GATCATTTGGGCCAGAAAAA	1	unique	GATC	DDB_G0267640	-	gtaE	has 18 amino acids between the two CX2C motifs	NA	NA	NA	NA	NA	NA
DDB0232428	481381	ATTTTTTTTTTCCAATGATC	1	GATCACCGCACCTCAAAAAC	1	unique	GATC	NA	NA	NA	NA	DDB_G0267640	DDB_G0267448	-	-	1967	304
DDB0232428	481774	TTTGAACATTTTTGATGATC	1	GATCTCTCCATTGACGATGA	1	unique	GATC	DDB_G0267448	-	DDB_G0267448	similar to yeast ERG24 involved in ergosterol biosynthesis	NA	NA	NA	NA	NA	NA
DDB0232428	482119	AAAAAATTAATATTTAGATC	1	GATCATATTTTAAAAAAAAT	1	unique	GATC	DDB_G0267448	-	DDB_G0267448	similar to yeast ERG24 involved in ergosterol biosynthesis	NA	NA	NA	NA	NA	NA
DDB0232428	482376	TTACAAATCCAAACAAGATC	1	GATCACCCCAAATAAGCATA	1	unique	GATC	DDB_G0267448	-	DDB_G0267448	similar to yeast ERG24 involved in ergosterol biosynthesis	NA	NA	NA	NA	NA	NA
DDB0232428	482513	CATACCAGTTGATAATGATC	1	GATCCATAAACTTTATATTC	1	unique	GATC	DDB_G0267448	-	DDB_G0267448	similar to yeast ERG24 involved in ergosterol biosynthesis	NA	NA	NA	NA	NA	NA
DDB0232428	482836	AAGATTGGACCAAAATGATC	1	GATCATATACAAGAGTTGGT	1	unique	GATC	DDB_G0267448	-	DDB_G0267448	similar to yeast ERG24 involved in ergosterol biosynthesis	NA	NA	NA	NA	NA	NA
DDB0232428	482953	GTGAGTCTTTTAGTTTGATC	1	GATCATAAATTAATGGTTGA	1	unique	GATC	DDB_G0267448	-	DDB_G0267448	similar to yeast ERG24 involved in ergosterol biosynthesis	NA	NA	NA	NA	NA	NA
DDB0232428	483637	AGAGATTACTTTATTGGATC	3	GATCTTATCTTTGGAGGTAC	1	unique_one	GATC	NA	NA	NA	NA	DDB_G0267448	DDB_G0267642	-	+	393	375
DDB0232428	483825	TAAATTTTAAAATCTAGATC	1	GATCCTTTTTTTTTTTTTGT	1	unique	GATC	NA	NA	NA	NA	DDB_G0267448	DDB_G0267642	-	+	581	187
DDB0232428	484201	GGAACAATTAATTGAGGATC	1	GATCAACATTGGAGACCAAT	1	unique	GATC	DDB_G0267642	+	DDB_G0267642	NA	NA	NA	NA	NA	NA	NA
DDB0232428	484330	ACGTAAACTTCAATTCGATC	1	GATCTTTCTGATCCATCACT	1	unique	GATC	DDB_G0267642	+	DDB_G0267642	NA	NA	NA	NA	NA	NA	NA
DDB0232428	484339	TCAATTCGATCTTTCTGATC	1	GATCCATCACTTGGTATAAC	1	unique	GATC	DDB_G0267642	+	DDB_G0267642	NA	NA	NA	NA	NA	NA	NA
DDB0232428	485220	TTTAGAGAACAAAAAAGATC	1	GATCTTTCAATTCAGTTTTA	1	unique	GATC	DDB_G0267642	+	DDB_G0267642	NA	NA	NA	NA	NA	NA	NA
DDB0232428	488243	ATCAGCAGCTGAACCTGATC	1	GATCTACAACAATAAATTCT	1	unique	GATC	DDB_G0267390	-	psmB6	subunit of the 20S proteasome (macropain)%2C the endopeptidase complex involved in an ATP%2Fubiquitin-dependent nonlysosomal proteolytic pathway%3B in eukaryotes composed of up to 28 subunits%2C which form a highly ordered ring-shaped structure (20S ring)%3B shift of Dictyostelium cells from the proliferative to differentiated state%3B highly expressed during the early stage of differentiation	NA	NA	NA	NA	NA	NA
DDB0232428	488811	TTCTATTTTTAATTTAGATC	1	GATCAAAACAGTGTTTTATA	1	unique	GATC	NA	NA	NA	NA	DDB_G0267390	DDB_G0267644	-	-	314	112
DDB0232428	488934	TTTATTTTTTAATTAAGATC	1	GATCAAATGGTGTTTTATAT	1	unique	GATC	DDB_G0267644	-	DDB_G0267644	NA	NA	NA	NA	NA	NA	NA
DDB0232428	490304	AAGGGTGCTTTTTTTTGATC	1	GATCTTCACCAAATTTAGTT	1	unique	GATC	NA	NA	NA	NA	DDB_G0267644	DDB_G0267646	-	+	192	321
DDB0232428	491902	AAAAAAAAGAGAATGGGATC	1	GATCAATAACACATAATAAA	1	unique	GATC	DDB_G0267648	+	DDB_G0267648	NA	NA	NA	NA	NA	NA	NA
DDB0232428	492618	TGGTAATTTATTCATTGATC	1	GATCAAATTATATTATTTTT	1	unique	GATC	DDB_G0267648	+	DDB_G0267648	NA	NA	NA	NA	NA	NA	NA
DDB0232428	493425	TAGAAATGAAGATGGAGATC	1	GATCAACAACAACAACAACA	51	unique_one	GATC	DDB_G0267648	+	DDB_G0267648	NA	NA	NA	NA	NA	NA	NA
DDB0232428	494002	TACGAATCTAATATCAGATC	1	GATCGCCATTACAGAATATC	1	unique	GATC	DDB_G0267648	+	DDB_G0267648	NA	NA	NA	NA	NA	NA	NA
DDB0232428	494298	TTTAAATAATACTCAAGATC	1	GATCAACAAAATAATAATTT	1	unique	GATC	DDB_G0267648	+	DDB_G0267648	NA	NA	NA	NA	NA	NA	NA
DDB0232428	495904	GCATTAATGTTTACAAGATC	1	GATCAGATTATCAAATAATT	1	unique	GATC	DDB_G0267650	+	ireA	ortholog of the yeast IRE1 serine%2Fthreonine kinase%2Fendoribonuclease%2C a transmembrane protein involved in the unfolded protein response%3B contains a ribonuclease 2-5A domain and 3 pyrrolo-quinoline quinone (PQQ) domains	NA	NA	NA	NA	NA	NA
DDB0232428	495930	TCAAATAATTGCTTTAGATC	1	GATCCAAAATCAGGTGTAGA	1	unique	GATC	DDB_G0267650	+	ireA	ortholog of the yeast IRE1 serine%2Fthreonine kinase%2Fendoribonuclease%2C a transmembrane protein involved in the unfolded protein response%3B contains a ribonuclease 2-5A domain and 3 pyrrolo-quinoline quinone (PQQ) domains	NA	NA	NA	NA	NA	NA
DDB0232428	496371	GATACCAAGTAATTTCGATC	1	GATCGTACATTTATGTTTGA	1	unique	GATC	DDB_G0267650	+	ireA	ortholog of the yeast IRE1 serine%2Fthreonine kinase%2Fendoribonuclease%2C a transmembrane protein involved in the unfolded protein response%3B contains a ribonuclease 2-5A domain and 3 pyrrolo-quinoline quinone (PQQ) domains	NA	NA	NA	NA	NA	NA
DDB0232428	496599	ACCATTAACACCATATGATC	1	GATCCAAGTAAACCAAATGG	1	unique	GATC	DDB_G0267650	+	ireA	ortholog of the yeast IRE1 serine%2Fthreonine kinase%2Fendoribonuclease%2C a transmembrane protein involved in the unfolded protein response%3B contains a ribonuclease 2-5A domain and 3 pyrrolo-quinoline quinone (PQQ) domains	NA	NA	NA	NA	NA	NA
DDB0232428	496738	ATAATAGTATTTATAAGATC	1	GATCAAAAAAGAATTTTAAT	1	unique	GATC	DDB_G0267650	+	ireA	ortholog of the yeast IRE1 serine%2Fthreonine kinase%2Fendoribonuclease%2C a transmembrane protein involved in the unfolded protein response%3B contains a ribonuclease 2-5A domain and 3 pyrrolo-quinoline quinone (PQQ) domains	NA	NA	NA	NA	NA	NA
DDB0232428	497616	ATTATTGGATAATGATGATC	1	GATCAATCATTAACATTCAC	1	unique	GATC	DDB_G0267650	+	ireA	ortholog of the yeast IRE1 serine%2Fthreonine kinase%2Fendoribonuclease%2C a transmembrane protein involved in the unfolded protein response%3B contains a ribonuclease 2-5A domain and 3 pyrrolo-quinoline quinone (PQQ) domains	NA	NA	NA	NA	NA	NA
DDB0232428	497811	GGGTAAATTCGATATTGATC	1	GATCAAATTAAACATTTACC	1	unique	GATC	DDB_G0267650	+	ireA	ortholog of the yeast IRE1 serine%2Fthreonine kinase%2Fendoribonuclease%2C a transmembrane protein involved in the unfolded protein response%3B contains a ribonuclease 2-5A domain and 3 pyrrolo-quinoline quinone (PQQ) domains	NA	NA	NA	NA	NA	NA
DDB0232428	498291	TAAAAATTTAAAAAATGATC	1	GATCAATATTTTGTTCAATA	1	unique	GATC	DDB_G0267650	+	ireA	ortholog of the yeast IRE1 serine%2Fthreonine kinase%2Fendoribonuclease%2C a transmembrane protein involved in the unfolded protein response%3B contains a ribonuclease 2-5A domain and 3 pyrrolo-quinoline quinone (PQQ) domains	NA	NA	NA	NA	NA	NA
DDB0232428	498662	TGTTGTCTAATAACTTGATC	1	GATCAGAATAATCATCATCA	1	unique	GATC	DDB_G0268486	-	DDB_G0268486_ps	putative pseudogene%2C contains protein kinase domain	NA	NA	NA	NA	NA	NA
DDB0232428	498782	TCACATGCACTTGGACGATC	1	GATCATAATCATTATGACTA	1	unique	GATC	DDB_G0268486	-	DDB_G0268486_ps	putative pseudogene%2C contains protein kinase domain	NA	NA	NA	NA	NA	NA
DDB0232428	499247	GCATACCTAAAGAATTGATC	1	GATCAAATGATGTCATCTTT	1	unique	GATC	DDB_G0268486	-	DDB_G0268486_ps	putative pseudogene%2C contains protein kinase domain	NA	NA	NA	NA	NA	NA
DDB0232428	499506	ATAAACTTCACCAAATGATC	1	GATCCTCTACCAATAAAATC	1	unique	GATC	DDB_G0268486	-	DDB_G0268486_ps	putative pseudogene%2C contains protein kinase domain	NA	NA	NA	NA	NA	NA
DDB0232428	499966	TTATTTCTTATGTTTGGATC	1	GATCTGCTCCACAAACCAAT	1	unique	GATC	DDB_G0268486	-	DDB_G0268486_ps	putative pseudogene%2C contains protein kinase domain	NA	NA	NA	NA	NA	NA
DDB0232428	500859	GAACCAATAATTATCTGATC	1	GATCTTCATTAAAAGTTTCC	1	unique	GATC	DDB_G0268486	-	DDB_G0268486_ps	putative pseudogene%2C contains protein kinase domain	NA	NA	NA	NA	NA	NA
DDB0232428	501432	TTTTTTTTTTTGTCTGGATC	1	GATCTATTACTAAACATTGG	1	unique	GATC	DDB_G0268486	-	DDB_G0268486_ps	putative pseudogene%2C contains protein kinase domain	NA	NA	NA	NA	NA	NA
DDB0232428	503181	TGCAGTCAATAGTGAAGATC	1	GATCTTCCATTAATCTAAAC	1	unique	GATC	NA	NA	NA	NA	DDB_G0268486	DDB_G0268488	-	+	1620	991
DDB0232428	504315	TTGTTTTTCAAAAATTGATC	1	GATCAAGAAAATAAAAAACA	1	unique	GATC	DDB_G0268488	+	tgrO_ps1	putative pseudogene%3B immunoglobulin E-set family gene	NA	NA	NA	NA	NA	NA
DDB0232428	504703	AATATTATTGTAAATGGATC	4	GATCTGATTTTTGTGATAGT	4	not_unique	GATC	DDB_G0268488	+	tgrO_ps1	putative pseudogene%3B immunoglobulin E-set family gene	NA	NA	NA	NA	NA	NA
DDB0232428	505206	TAAATATAGTTTACCAGATC	4	GATCGTGTTTTACAATTAAA	3	not_unique	GATC	DDB_G0268488	+	tgrO_ps1	putative pseudogene%3B immunoglobulin E-set family gene	NA	NA	NA	NA	NA	NA
DDB0232428	506388	ACAACCATTATTTAATGATC	1	GATCAAAAACTATTATTAAA	4	unique_one	GATC	DDB_G0268488	+	tgrO_ps1	putative pseudogene%3B immunoglobulin E-set family gene	NA	NA	NA	NA	NA	NA
DDB0232428	506864	TATTTTTTATTTCTCTGATC	3	GATCATAAATTTGAACCTGA	3	not_unique	GATC	NA	NA	NA	NA	DDB_G0268488	DDB_G0268490	+	+	120	802
DDB0232428	508057	AAAAACATACAAATTAGATC	2	GATCAAGAATTGTTTCCAAC	1	unique_one	GATC	DDB_G0268490	+	tgrO1	NA	NA	NA	NA	NA	NA	NA
DDB0232428	508376	AATATTATTGTAAATGGATC	4	GATCTGATTTTTGTGATAGT	4	not_unique	GATC	DDB_G0268490	+	tgrO1	NA	NA	NA	NA	NA	NA	NA
DDB0232428	508888	TAAATATAGTTTACCAGATC	4	GATCGTGTTTTACAATTAAA	3	not_unique	GATC	DDB_G0268490	+	tgrO1	NA	NA	NA	NA	NA	NA	NA
DDB0232428	510058	TGAAACATTATTTAATGATC	1	GATCAAAAACTATTATTAAA	4	unique_one	GATC	DDB_G0268490	+	tgrO1	NA	NA	NA	NA	NA	NA	NA
DDB0232428	510534	TATTTTTTATTTCTCTGATC	3	GATCATAAATTTGGACCTGA	1	unique_one	GATC	NA	NA	NA	NA	DDB_G0268490	DDB_G0267654	+	+	120	807
DDB0232428	511732	AAAAACATACAAATTAGATC	2	GATCATGAATTGTTTCCCAC	1	unique_one	GATC	DDB_G0267654	+	tgrO2	NA	NA	NA	NA	NA	NA	NA
DDB0232428	512054	AATATTATTGTAAATGGATC	4	GATCTGATTTTTGTGATAGT	4	not_unique	GATC	DDB_G0267654	+	tgrO2	NA	NA	NA	NA	NA	NA	NA
DDB0232428	512560	TAAATATAGTTTACCAGATC	4	GATCGTGTTTTACAATTAAA	3	not_unique	GATC	DDB_G0267654	+	tgrO2	NA	NA	NA	NA	NA	NA	NA
DDB0232428	513310	ATCTTTGAAAAGAATCGATC	1	GATCAAAGTCAAATGGAAAC	1	unique	GATC	DDB_G0267654	+	tgrO2	NA	NA	NA	NA	NA	NA	NA
DDB0232428	513742	ACAATCATTATTTAATGATC	1	GATCAAAAACTATTATTAAA	4	unique_one	GATC	DDB_G0267654	+	tgrO2	NA	NA	NA	NA	NA	NA	NA
DDB0232428	514221	TATTTTTTATTTCTCTGATC	3	GATCATAAATTTGAACCTGA	3	not_unique	GATC	NA	NA	NA	NA	DDB_G0267654	DDB_G0268304	+	+	123	956
DDB0232428	515889	AATATTATTGTAAATGGATC	4	GATCTGATTTTTGTGATAGT	4	not_unique	GATC	DDB_G0268304	+	tgrO3	NA	NA	NA	NA	NA	NA	NA
DDB0232428	516392	TAAATATAGTTTACCAGATC	4	GATCGTATTTTACAATTAAA	1	unique_one	GATC	DDB_G0268304	+	tgrO3	NA	NA	NA	NA	NA	NA	NA
DDB0232428	517574	GCAATCATTATTTAATGATC	1	GATCAAAAACTATTATTAAA	4	unique_one	GATC	DDB_G0268304	+	tgrO3	NA	NA	NA	NA	NA	NA	NA
DDB0232428	517736	AAGTAATGATATAATAGATC	1	GATCATGAAAAAAACAATAA	1	unique	GATC	DDB_G0268304	+	tgrO3	NA	NA	NA	NA	NA	NA	NA
DDB0232428	518016	GAAATGTCAGAATTAAGATC	1	GATCCAATCTATTCATACAC	1	unique	GATC	DDB_G0268304	+	tgrO3	NA	NA	NA	NA	NA	NA	NA
DDB0232428	518081	ACAACAAATGGAAAGGGATC	1	GATCAAATCAATAAAAGTCC	1	unique	GATC	DDB_G0268304	+	tgrO3	NA	NA	NA	NA	NA	NA	NA
DDB0232428	518600	GAGCAAAATTTGAAAAGATC	1	GATCTTTCTAAAAATAGAAT	1	unique	GATC	NA	NA	NA	NA	DDB_G0268304	DDB_G0267656	+	+	223	110
DDB0232428	518960	ATTTATTATAAACCAGGATC	1	GATCATTAAGAGCTAAACTT	1	unique	GATC	DDB_G0267656	+	l2hgdh	ortholog of the H. sapiens L2HGDH%2C which when defective causes L-2-hydroxyglutaric aciduria-a rare autosomal recessive disorder	NA	NA	NA	NA	NA	NA
DDB0232428	519793	TAGAGATTTTAATAAAGATC	1	GATCATTTCATTCAACTTTT	1	unique	GATC	DDB_G0267656	+	l2hgdh	ortholog of the H. sapiens L2HGDH%2C which when defective causes L-2-hydroxyglutaric aciduria-a rare autosomal recessive disorder	NA	NA	NA	NA	NA	NA
DDB0232428	520436	TCATTATTATCTTTAAGATC	1	GATCTTTAGTATTATTAACC	1	unique	GATC	DDB_G0268492	-	DDB_G0268492	NA	NA	NA	NA	NA	NA	NA
DDB0232428	521257	TTGAAAACCTCTTTTTGATC	1	GATCAACCCATTCTAAAAAC	1	unique	GATC	DDB_G0268492	-	DDB_G0268492	NA	NA	NA	NA	NA	NA	NA
DDB0232428	521281	CATTCTAAAAACAATTGATC	1	GATCAGTATGTTTCATAGAG	1	unique	GATC	DDB_G0268492	-	DDB_G0268492	NA	NA	NA	NA	NA	NA	NA
DDB0232428	521305	TGTTTCATAGAGGTACGATC	1	GATCAACCGATTTAAATAAA	1	unique	GATC	DDB_G0268492	-	DDB_G0268492	NA	NA	NA	NA	NA	NA	NA
DDB0232428	521623	AATTTGATTTTACCTTGATC	1	GATCAATTGAAAATAATAAA	1	unique	GATC	DDB_G0268492	-	DDB_G0268492	NA	NA	NA	NA	NA	NA	NA
DDB0232428	521925	ACCATAATAATTTGCTGATC	1	GATCGATTATTTTGTCTACT	1	unique	GATC	DDB_G0268492	-	DDB_G0268492	NA	NA	NA	NA	NA	NA	NA
DDB0232428	522000	TGTGCTATTATAACTTGATC	1	GATCTTTGTTGTTGTTGTGT	2	unique_one	GATC	DDB_G0268492	-	DDB_G0268492	NA	NA	NA	NA	NA	NA	NA
DDB0232428	522295	TTATTGAAGCTATTACGATC	1	GATCCCCCATTGTTGAATAT	1	unique	GATC	DDB_G0268492	-	DDB_G0268492	NA	NA	NA	NA	NA	NA	NA
DDB0232428	522395	ATTGAATTCTAGAAGGGATC	1	GATCATATTTTTTTTTTTAG	1	unique	GATC	DDB_G0268492	-	DDB_G0268492	NA	NA	NA	NA	NA	NA	NA
DDB0232428	523423	AATAATTTATTTTTTGGATC	1	GATCAAATGGTGCTGATGGT	1	unique	GATC	DDB_G0267658	+	DDB_G0267658	NA	NA	NA	NA	NA	NA	NA
DDB0232428	523860	AGAGAATGACGTAATGGATC	1	GATCCATCTAAACGTCATTC	1	unique	GATC	DDB_G0267658	+	DDB_G0267658	NA	NA	NA	NA	NA	NA	NA
DDB0232428	524181	TTATCAAAGAATGGTAGATC	1	GATCAATTAAAGAGAAGAGA	1	unique	GATC	DDB_G0267658	+	DDB_G0267658	NA	NA	NA	NA	NA	NA	NA
DDB0232428	524278	AGTTTCAATTCAAATAGATC	1	GATCATTAATCACTAAATTT	1	unique	GATC	DDB_G0267658	+	DDB_G0267658	NA	NA	NA	NA	NA	NA	NA
DDB0232428	524484	TCTAAATGATGATATTGATC	1	GATCATAATCAAGAACCAAT	1	unique	GATC	DDB_G0267658	+	DDB_G0267658	NA	NA	NA	NA	NA	NA	NA
DDB0232428	524626	AAAGCATTACTTCAAAGATC	1	GATCACTTGAAATCATTGAA	1	unique	GATC	DDB_G0267658	+	DDB_G0267658	NA	NA	NA	NA	NA	NA	NA
DDB0232428	527950	ATATCAAAACTACAACGATC	1	GATCAACATGGTCAATATTC	1	unique	GATC	DDB_G0267662	+	DDB_G0267662	NA	NA	NA	NA	NA	NA	NA
DDB0232428	527989	AGATAATTCATGGTATGATC	1	GATCCAATTCCACCAAGTCC	1	unique	GATC	DDB_G0267662	+	DDB_G0267662	NA	NA	NA	NA	NA	NA	NA
DDB0232428	528367	TGAAAATGATTATATTGATC	1	GATCATTCTGAAAACTATCA	1	unique	GATC	DDB_G0267662	+	DDB_G0267662	NA	NA	NA	NA	NA	NA	NA
DDB0232428	528700	CTATAATTATAATATTGATC	1	GATCATTTCAATGAAGAAAC	1	unique	GATC	DDB_G0267662	+	DDB_G0267662	NA	NA	NA	NA	NA	NA	NA
DDB0232428	529429	TAAAAAAACAATTAATGATC	1	GATCCAATAAATCCGAAAAA	1	unique	GATC	DDB_G0349281	-	DDB_G0349281	NA	NA	NA	NA	NA	NA	NA
DDB0232428	529612	AATCGAAATTAATGTTGATC	1	GATCATCAAATATTAATTTT	2	unique_one	GATC	DDB_G0349281	-	DDB_G0349281	NA	NA	NA	NA	NA	NA	NA
DDB0232428	533274	TCATCAAATATTTCAGGATC	1	GATCAAATAGTATTCAAAAT	1	unique	GATC	DDB_G0267666	+	gefW	putative Ras guanine nucleotide exchange factor%3B promotes the exchange of GDP for GTP on Ras small GTPases thus converting them into the active form%3B similar to son of sevenless	NA	NA	NA	NA	NA	NA
DDB0232428	533457	AATGGTAATATAATTGGATC	1	GATCAATACAATCACCATCA	1	unique	GATC	DDB_G0267666	+	gefW	putative Ras guanine nucleotide exchange factor%3B promotes the exchange of GDP for GTP on Ras small GTPases thus converting them into the active form%3B similar to son of sevenless	NA	NA	NA	NA	NA	NA
DDB0232428	533531	TCTTTCAAAATTTTTAGATC	1	GATCAACATACACCACCACC	1	unique	GATC	DDB_G0267666	+	gefW	putative Ras guanine nucleotide exchange factor%3B promotes the exchange of GDP for GTP on Ras small GTPases thus converting them into the active form%3B similar to son of sevenless	NA	NA	NA	NA	NA	NA
DDB0232428	534036	ATTATTGGTGCATCGGGATC	1	GATCACCATCGTCCAATGCG	1	unique	GATC	DDB_G0267666	+	gefW	putative Ras guanine nucleotide exchange factor%3B promotes the exchange of GDP for GTP on Ras small GTPases thus converting them into the active form%3B similar to son of sevenless	NA	NA	NA	NA	NA	NA
DDB0232428	534669	AATTCACTTCAAGAAAGATC	2	GATCAATTTTAAAATATAAT	1	unique_one	GATC	DDB_G0267666	+	gefW	putative Ras guanine nucleotide exchange factor%3B promotes the exchange of GDP for GTP on Ras small GTPases thus converting them into the active form%3B similar to son of sevenless	NA	NA	NA	NA	NA	NA
DDB0232428	535289	TAAAAAAGATATTGAAGATC	1	GATCTTTATGTTGAGAAATA	1	unique	GATC	DDB_G0267666	+	gefW	putative Ras guanine nucleotide exchange factor%3B promotes the exchange of GDP for GTP on Ras small GTPases thus converting them into the active form%3B similar to son of sevenless	NA	NA	NA	NA	NA	NA
DDB0232428	535329	TTACAAGTTCATCTAAGATC	1	GATCAATTGTTAGAAAAATT	1	unique	GATC	DDB_G0267666	+	gefW	putative Ras guanine nucleotide exchange factor%3B promotes the exchange of GDP for GTP on Ras small GTPases thus converting them into the active form%3B similar to son of sevenless	NA	NA	NA	NA	NA	NA
DDB0232428	535358	AAAAATTAATTTTCATGATC	1	GATCCTATTGGACATTATTT	1	unique	GATC	DDB_G0267666	+	gefW	putative Ras guanine nucleotide exchange factor%3B promotes the exchange of GDP for GTP on Ras small GTPases thus converting them into the active form%3B similar to son of sevenless	NA	NA	NA	NA	NA	NA
DDB0232428	535916	GGCTACCTATATCCAAGATC	1	GATCCACCTTATATACCAAT	1	unique	GATC	DDB_G0267666	+	gefW	putative Ras guanine nucleotide exchange factor%3B promotes the exchange of GDP for GTP on Ras small GTPases thus converting them into the active form%3B similar to son of sevenless	NA	NA	NA	NA	NA	NA
DDB0232428	537109	TTTTGATTGTTATCATGATC	1	GATCCAACTAAGAGTGAAAC	1	unique	GATC	DDB_G0267668	+	hspL	NA	NA	NA	NA	NA	NA	NA
DDB0232428	538020	TAGAAATTTAATTTATGATC	1	GATCCATTTTCATTTTTTCA	1	unique	GATC	DDB_G0267670	-	DDB_G0267670	NA	NA	NA	NA	NA	NA	NA
DDB0232428	539032	TAATATATAATATCATGATC	1	GATCTTTTTCTTTTTTCGAC	1	unique	GATC	NA	NA	NA	NA	DDB_G0267670	DDB_G0267672	-	+	540	144
DDB0232428	543578	AGATGATGATGATGAGGATC	1	GATCATGAGGATCATGATGA	1	unique	GATC	DDB_G0268494	+	DDB_G0268494	NA	NA	NA	NA	NA	NA	NA
DDB0232428	543587	TGATGAGGATCATGAGGATC	1	GATCATGATGATACAAAAAA	1	unique	GATC	DDB_G0268494	+	DDB_G0268494	NA	NA	NA	NA	NA	NA	NA
DDB0232428	543821	TAGTGGTAGTGGTAATGATC	1	GATCATAGTAAATTCAAAGA	1	unique	GATC	DDB_G0268494	+	DDB_G0268494	NA	NA	NA	NA	NA	NA	NA
DDB0232428	543839	TCATAGTAAATTCAAAGATC	1	GATCAAGAATTCTTTAAAAA	1	unique	GATC	DDB_G0268494	+	DDB_G0268494	NA	NA	NA	NA	NA	NA	NA
DDB0232428	545296	ATTAAATAGTGGAGTTGATC	1	GATCAAATGATGAATGAACT	1	unique	GATC	DDB_G0267674	+	glcS	CAZy family GT3%3B catalyzes the reaction UDP-glucose %2B (1%2C4-alpha-D-glucosyl)(n) %3C%3D%3E UDP %2B (1%2C4-alpha-D-glucosyl)(n%2B1)	NA	NA	NA	NA	NA	NA
DDB0232428	545353	TCATACAGTATTATTCGATC	1	GATCTTTCATGGGAAGTTGC	1	unique	GATC	DDB_G0267674	+	glcS	CAZy family GT3%3B catalyzes the reaction UDP-glucose %2B (1%2C4-alpha-D-glucosyl)(n) %3C%3D%3E UDP %2B (1%2C4-alpha-D-glucosyl)(n%2B1)	NA	NA	NA	NA	NA	NA
DDB0232428	545693	AAAAGTATTTTTAATTGATC	1	GATCTTCATAGTTCAATGCA	1	unique	GATC	DDB_G0267674	+	glcS	CAZy family GT3%3B catalyzes the reaction UDP-glucose %2B (1%2C4-alpha-D-glucosyl)(n) %3C%3D%3E UDP %2B (1%2C4-alpha-D-glucosyl)(n%2B1)	NA	NA	NA	NA	NA	NA
DDB0232428	546642	TTATTACAACAGAGTGGATC	1	GATCAAAGATGACAGTTGTT	1	unique	GATC	DDB_G0267674	+	glcS	CAZy family GT3%3B catalyzes the reaction UDP-glucose %2B (1%2C4-alpha-D-glucosyl)(n) %3C%3D%3E UDP %2B (1%2C4-alpha-D-glucosyl)(n%2B1)	NA	NA	NA	NA	NA	NA
DDB0232428	546842	ACTATTATCACAAGAGGATC	1	GATCTAGTTATGTTAAAGAG	1	unique	GATC	DDB_G0267674	+	glcS	CAZy family GT3%3B catalyzes the reaction UDP-glucose %2B (1%2C4-alpha-D-glucosyl)(n) %3C%3D%3E UDP %2B (1%2C4-alpha-D-glucosyl)(n%2B1)	NA	NA	NA	NA	NA	NA
DDB0232428	546919	TTGTAACTCATAATATGATC	1	GATCAATGATAATGACGAAA	1	unique	GATC	DDB_G0267674	+	glcS	CAZy family GT3%3B catalyzes the reaction UDP-glucose %2B (1%2C4-alpha-D-glucosyl)(n) %3C%3D%3E UDP %2B (1%2C4-alpha-D-glucosyl)(n%2B1)	NA	NA	NA	NA	NA	NA
DDB0232428	546983	ATTCAACTCTCAAGAGGATC	1	GATCGTGTAAAGGTTATCTA	1	unique	GATC	DDB_G0267674	+	glcS	CAZy family GT3%3B catalyzes the reaction UDP-glucose %2B (1%2C4-alpha-D-glucosyl)(n) %3C%3D%3E UDP %2B (1%2C4-alpha-D-glucosyl)(n%2B1)	NA	NA	NA	NA	NA	NA
DDB0232428	547265	CTCTAGAGAAACTGTTGATC	1	GATCAAATGACTCAATACCT	1	unique	GATC	DDB_G0267674	+	glcS	CAZy family GT3%3B catalyzes the reaction UDP-glucose %2B (1%2C4-alpha-D-glucosyl)(n) %3C%3D%3E UDP %2B (1%2C4-alpha-D-glucosyl)(n%2B1)	NA	NA	NA	NA	NA	NA
DDB0232428	547443	CCAAAACCAATCTCAAGATC	1	GATCACCTTCACCTTCACCT	1	unique	GATC	DDB_G0267674	+	glcS	CAZy family GT3%3B catalyzes the reaction UDP-glucose %2B (1%2C4-alpha-D-glucosyl)(n) %3C%3D%3E UDP %2B (1%2C4-alpha-D-glucosyl)(n%2B1)	NA	NA	NA	NA	NA	NA
DDB0232428	547932	ATTCCAACAAATAAAGGATC	1	GATCCACAGCAACAACTACA	1	unique	GATC	DDB_G0267674	+	glcS	CAZy family GT3%3B catalyzes the reaction UDP-glucose %2B (1%2C4-alpha-D-glucosyl)(n) %3C%3D%3E UDP %2B (1%2C4-alpha-D-glucosyl)(n%2B1)	NA	NA	NA	NA	NA	NA
DDB0232428	548869	GGTACAAAAACTGATTGATC	1	GATCAATTAATAAACCTAAA	1	unique	GATC	DDB_G0267676	-	DDB_G0267676	NA	NA	NA	NA	NA	NA	NA
DDB0232428	548923	TTTTTCTTTTCAATTTGATC	1	GATCAAAATGATCAACTTTT	1	unique	GATC	DDB_G0267676	-	DDB_G0267676	NA	NA	NA	NA	NA	NA	NA
DDB0232428	548932	TCAATTTGATCAAAATGATC	1	GATCAACTTTTCTAATTGTT	1	unique	GATC	DDB_G0267676	-	DDB_G0267676	NA	NA	NA	NA	NA	NA	NA
DDB0232428	549202	TCAGATACTTCATCTTGATC	1	GATCAATTAAACGAAAATAA	1	unique	GATC	DDB_G0267676	-	DDB_G0267676	NA	NA	NA	NA	NA	NA	NA
DDB0232428	549760	GAGCATATCTCCTTTTGATC	1	GATCTGGTGAATTATCACTT	1	unique	GATC	DDB_G0267676	-	DDB_G0267676	NA	NA	NA	NA	NA	NA	NA
DDB0232428	550248	AGTGCTTGATTTAAACGATC	1	GATCTAATGTCTTTTTCTTT	1	unique	GATC	DDB_G0267676	-	DDB_G0267676	NA	NA	NA	NA	NA	NA	NA
DDB0232428	551467	TTATTAATACTATTTTGATC	1	GATCTTTTTTCTTTGAAATT	1	unique	GATC	DDB_G0267384	-	culB	similar to mammalian cullin 1 and 2 (CUL1%2C CUL2)%3B involved in ubiquitin-mediated protein degradation%3B regulates prestalk cell differentiation in %3Ci%3EDictyostelium%3C%2Fi%3E	NA	NA	NA	NA	NA	NA
DDB0232428	551805	AGAATGTAATGACCATGATC	1	GATCCTGATGTTAAAACTAA	1	unique	GATC	DDB_G0267384	-	culB	similar to mammalian cullin 1 and 2 (CUL1%2C CUL2)%3B involved in ubiquitin-mediated protein degradation%3B regulates prestalk cell differentiation in %3Ci%3EDictyostelium%3C%2Fi%3E	NA	NA	NA	NA	NA	NA
DDB0232428	552083	CTTGTTTTAAACCTGTGATC	1	GATCATAAACTTTTCAATAT	1	unique	GATC	DDB_G0267384	-	culB	similar to mammalian cullin 1 and 2 (CUL1%2C CUL2)%3B involved in ubiquitin-mediated protein degradation%3B regulates prestalk cell differentiation in %3Ci%3EDictyostelium%3C%2Fi%3E	NA	NA	NA	NA	NA	NA
DDB0232428	552553	TCAACATAAATTTTTGGATC	1	GATCCTTTTTTTTTTAAAAA	1	unique	GATC	DDB_G0267384	-	culB	similar to mammalian cullin 1 and 2 (CUL1%2C CUL2)%3B involved in ubiquitin-mediated protein degradation%3B regulates prestalk cell differentiation in %3Ci%3EDictyostelium%3C%2Fi%3E	NA	NA	NA	NA	NA	NA
DDB0232428	552832	ATTCCTTATGCTTTTCGATC	1	GATCAAGATAGAATGTAACA	1	unique	GATC	DDB_G0267384	-	culB	similar to mammalian cullin 1 and 2 (CUL1%2C CUL2)%3B involved in ubiquitin-mediated protein degradation%3B regulates prestalk cell differentiation in %3Ci%3EDictyostelium%3C%2Fi%3E	NA	NA	NA	NA	NA	NA
DDB0232428	553850	ATTATTAATAAGATTTGATC	1	GATCTACATGTTGTTCGAAA	1	unique	GATC	DDB_G0267384	-	culB	similar to mammalian cullin 1 and 2 (CUL1%2C CUL2)%3B involved in ubiquitin-mediated protein degradation%3B regulates prestalk cell differentiation in %3Ci%3EDictyostelium%3C%2Fi%3E	NA	NA	NA	NA	NA	NA
DDB0232428	554167	AATATTTTATAAACTTGATC	1	GATCTGCTATATTTTTCCAA	1	unique	GATC	DDB_G0267384	-	culB	similar to mammalian cullin 1 and 2 (CUL1%2C CUL2)%3B involved in ubiquitin-mediated protein degradation%3B regulates prestalk cell differentiation in %3Ci%3EDictyostelium%3C%2Fi%3E	NA	NA	NA	NA	NA	NA
DDB0232428	554506	AAATTCTTGGTTGGTTGATC	1	GATCAAAAATAATAAAATTT	1	unique	GATC	NA	NA	NA	NA	DDB_G0267384	DDB_G0268496	-	-	279	146
DDB0232428	554753	TCTTTTGGATAATGTTGATC	1	GATCAATATTTGTAACTTTT	1	unique	GATC	DDB_G0268496	-	DDB_G0268496	NA	NA	NA	NA	NA	NA	NA
DDB0232428	555356	ATGTGTACTTTGGTGGGATC	1	GATCCGATGAGGAGCCGGCA	1	unique	GATC	DDB_G0268496	-	DDB_G0268496	NA	NA	NA	NA	NA	NA	NA
DDB0232428	555387	CGGCACCAAAACTTGAGATC	1	GATCACTCTAAGATTCTCAC	1	unique	GATC	DDB_G0268496	-	DDB_G0268496	NA	NA	NA	NA	NA	NA	NA
DDB0232428	555586	CATGACCTCCACCTTTGATC	1	GATCTACCCACATCGTTTCT	1	unique	GATC	DDB_G0268496	-	DDB_G0268496	NA	NA	NA	NA	NA	NA	NA
DDB0232428	555647	GATGACAATGTAACGAGATC	1	GATCTGGGTCTATTAATCTC	1	unique	GATC	DDB_G0268496	-	DDB_G0268496	NA	NA	NA	NA	NA	NA	NA
DDB0232428	555991	ACCACCACCATTCAATGATC	1	GATCTCTTTTTCTTTTTGGC	1	unique	GATC	DDB_G0268496	-	DDB_G0268496	NA	NA	NA	NA	NA	NA	NA
DDB0232428	557148	AAGAAGTTGACAATGAGATC	1	GATCCAAAAAAAAATATTTG	1	unique	GATC	DDB_G0267678	+	tgrO_ps2	putative pseudogene%3B small fragment%2C similar to genes of the tgrO family	NA	NA	NA	NA	NA	NA
DDB0232428	557260	GTTAAAAAAACAAGAAGATC	2	GATCAATTAAAAAGTTAATA	1	unique_one	GATC	DDB_G0267678	+	tgrO_ps2	putative pseudogene%3B small fragment%2C similar to genes of the tgrO family	NA	NA	NA	NA	NA	NA
DDB0232428	557581	TAAAATGGGAATAATCGATC	1	GATCCAAATTCCTCAAAACT	1	unique	GATC	DDB_G0267680	+	DDB_G0267680	NA	NA	NA	NA	NA	NA	NA
DDB0232428	558438	TATATTTGTAAAATTAGATC	1	GATCGAGTTTGAGTTATAGT	1	unique	GATC	NA	NA	NA	NA	DDB_G0267680	DDB_G0268306	+	-	152	100
DDB0232428	558693	GTACGTGGTAATGTTGGATC	1	GATCTGATGCAATATCTTGT	1	unique	GATC	DDB_G0268306	-	rpb9	component of the RNA polymerase II complex%3B ortholog of S. cerevisiae RPB9	NA	NA	NA	NA	NA	NA
DDB0232428	558924	GTTGCTTCTTCTTTATGATC	1	GATCACAAATTCTACATGCT	1	unique	GATC	DDB_G0268306	-	rpb9	component of the RNA polymerase II complex%3B ortholog of S. cerevisiae RPB9	NA	NA	NA	NA	NA	NA
DDB0232428	559690	GGCATTAAAAAAAAGTGATC	1	GATCTTTCCATGGTAGAAAT	1	unique	GATC	DDB_G0267682	+	ercc1	ortholog of H. sapiens ERCC1 and S. cerevisiae RAD10 nucleotide excision repair genes%3B defects in ERCC1 cause cerebro-oculo-facio-skeletal syndrome type 4 (COFS4)	NA	NA	NA	NA	NA	NA
DDB0232428	560314	TCCAAATTTAATTCAAGATC	1	GATCGTATTAAAGGTTTATC	1	unique	GATC	DDB_G0267682	+	ercc1	ortholog of H. sapiens ERCC1 and S. cerevisiae RAD10 nucleotide excision repair genes%3B defects in ERCC1 cause cerebro-oculo-facio-skeletal syndrome type 4 (COFS4)	NA	NA	NA	NA	NA	NA
DDB0232428	560938	TGATGAGAATGAAGTGGATC	1	GATCAAGATCCTCTCAATTT	1	unique	GATC	DDB_G0267682	+	ercc1	ortholog of H. sapiens ERCC1 and S. cerevisiae RAD10 nucleotide excision repair genes%3B defects in ERCC1 cause cerebro-oculo-facio-skeletal syndrome type 4 (COFS4)	NA	NA	NA	NA	NA	NA
DDB0232428	560944	GAATGAAGTGGATCAAGATC	1	GATCCTCTCAATTTTTCATT	1	unique	GATC	DDB_G0267682	+	ercc1	ortholog of H. sapiens ERCC1 and S. cerevisiae RAD10 nucleotide excision repair genes%3B defects in ERCC1 cause cerebro-oculo-facio-skeletal syndrome type 4 (COFS4)	NA	NA	NA	NA	NA	NA
DDB0232428	561426	TTTTTTTTTTTTTTTTGATC	134	GATCACTTTTTTTTTCTATT	1	unique_one	GATC	NA	NA	NA	NA	DDB_G0267682	DDB_G0267684	+	+	390	90
DDB0232428	562088	GCATTCCTTACAACAGGATC	1	GATCTATTGAAAATTTAATA	1	unique	GATC	DDB_G0267684	+	DDB_G0267684	similar to %3Ci%3EDictystelium%3C%2Fi%3E cell surface glycoproteins gp130%2C and GP138A%2C B%2C C%2C and D	NA	NA	NA	NA	NA	NA
DDB0232428	562378	TCAATTATTTGATTTTGATC	1	GATCCCTCAATAAACAATAT	1	unique	GATC	DDB_G0267684	+	DDB_G0267684	similar to %3Ci%3EDictystelium%3C%2Fi%3E cell surface glycoproteins gp130%2C and GP138A%2C B%2C C%2C and D	NA	NA	NA	NA	NA	NA
DDB0232428	562900	GGTAATACTTTTAATGGATC	1	GATCAATTCCAAATGAATAT	1	unique	GATC	DDB_G0267684	+	DDB_G0267684	similar to %3Ci%3EDictystelium%3C%2Fi%3E cell surface glycoproteins gp130%2C and GP138A%2C B%2C C%2C and D	NA	NA	NA	NA	NA	NA
DDB0232428	563091	CGAAGATTACCTAATGGATC	1	GATCTATCCCCTCTTAGTAC	1	unique	GATC	DDB_G0267684	+	DDB_G0267684	similar to %3Ci%3EDictystelium%3C%2Fi%3E cell surface glycoproteins gp130%2C and GP138A%2C B%2C C%2C and D	NA	NA	NA	NA	NA	NA
DDB0232428	564277	TTTTCGATGATTATTGGATC	1	GATCTATTTCTTTGGTTTTT	1	unique	GATC	NA	NA	NA	NA	NA	NA	NA	NA	NA	NA
DDB0232428	564866	AGATTTAAACTCTTTAGATC	1	GATCTCGATGTACAATCACT	1	unique	GATC	DDB_G0267686	-	DDB_G0267686	member of the TKL (tyrosine kinase-like) group%3B belongs to the ARK (ankyrin repeat-containing kinase) family%2C although it does not contain ankyrin repeats%3B contains an RGS (Regulator of G protein Signaling) domain	NA	NA	NA	NA	NA	NA
DDB0232428	565031	ATCATACAAATCTTTGGATC	1	GATCCAATACCATACCATAA	1	unique	GATC	DDB_G0267686	-	DDB_G0267686	member of the TKL (tyrosine kinase-like) group%3B belongs to the ARK (ankyrin repeat-containing kinase) family%2C although it does not contain ankyrin repeats%3B contains an RGS (Regulator of G protein Signaling) domain	NA	NA	NA	NA	NA	NA
DDB0232428	565069	GTAAACTACATGTGGAGATC	1	GATCTCAATGATGACATAAT	1	unique	GATC	DDB_G0267686	-	DDB_G0267686	member of the TKL (tyrosine kinase-like) group%3B belongs to the ARK (ankyrin repeat-containing kinase) family%2C although it does not contain ankyrin repeats%3B contains an RGS (Regulator of G protein Signaling) domain	NA	NA	NA	NA	NA	NA
DDB0232428	565135	TTGTGACTCTGGTTCGGATC	1	GATCTTAAAACTTTTACTGC	1	unique	GATC	DDB_G0267686	-	DDB_G0267686	member of the TKL (tyrosine kinase-like) group%3B belongs to the ARK (ankyrin repeat-containing kinase) family%2C although it does not contain ankyrin repeats%3B contains an RGS (Regulator of G protein Signaling) domain	NA	NA	NA	NA	NA	NA
DDB0232428	565309	AATTGTTGGATTATTTGATC	1	GATCTAAATGGTCTATTACT	1	unique	GATC	DDB_G0267686	-	DDB_G0267686	member of the TKL (tyrosine kinase-like) group%3B belongs to the ARK (ankyrin repeat-containing kinase) family%2C although it does not contain ankyrin repeats%3B contains an RGS (Regulator of G protein Signaling) domain	NA	NA	NA	NA	NA	NA
DDB0232428	565934	GCTCTATTATTTAAAAGATC	1	GATCACCATTACCAATTCCA	1	unique	GATC	DDB_G0267686	-	DDB_G0267686	member of the TKL (tyrosine kinase-like) group%3B belongs to the ARK (ankyrin repeat-containing kinase) family%2C although it does not contain ankyrin repeats%3B contains an RGS (Regulator of G protein Signaling) domain	NA	NA	NA	NA	NA	NA
DDB0232428	567049	TGGTGATGAATTGATAGATC	1	GATCCAGTTGGCTGTAATTG	1	unique	GATC	DDB_G0267686	-	DDB_G0267686	member of the TKL (tyrosine kinase-like) group%3B belongs to the ARK (ankyrin repeat-containing kinase) family%2C although it does not contain ankyrin repeats%3B contains an RGS (Regulator of G protein Signaling) domain	NA	NA	NA	NA	NA	NA
DDB0232428	567950	TCCTCCAAAACCAATTGATC	1	GATCCGTATTAAATATACCA	1	unique	GATC	DDB_G0267686	-	DDB_G0267686	member of the TKL (tyrosine kinase-like) group%3B belongs to the ARK (ankyrin repeat-containing kinase) family%2C although it does not contain ankyrin repeats%3B contains an RGS (Regulator of G protein Signaling) domain	NA	NA	NA	NA	NA	NA
DDB0232428	568514	GGTGTTTTAACTACATGATC	1	GATCACCAGTTTGTGATGGT	1	unique	GATC	DDB_G0267686	-	DDB_G0267686	member of the TKL (tyrosine kinase-like) group%3B belongs to the ARK (ankyrin repeat-containing kinase) family%2C although it does not contain ankyrin repeats%3B contains an RGS (Regulator of G protein Signaling) domain	NA	NA	NA	NA	NA	NA
DDB0232428	569027	ATATTAACAGCTAATAGATC	1	GATCTTCTTTTTCTAAACCA	1	unique	GATC	DDB_G0267686	-	DDB_G0267686	member of the TKL (tyrosine kinase-like) group%3B belongs to the ARK (ankyrin repeat-containing kinase) family%2C although it does not contain ankyrin repeats%3B contains an RGS (Regulator of G protein Signaling) domain	NA	NA	NA	NA	NA	NA
DDB0232428	569287	CTTTCCCAAACTACTTGATC	1	GATCCACTACCAACTATAGA	1	unique	GATC	DDB_G0267686	-	DDB_G0267686	member of the TKL (tyrosine kinase-like) group%3B belongs to the ARK (ankyrin repeat-containing kinase) family%2C although it does not contain ankyrin repeats%3B contains an RGS (Regulator of G protein Signaling) domain	NA	NA	NA	NA	NA	NA
DDB0232428	570203	TCATTTTCTAGTTTTTGATC	1	GATCAAGTTTCTCTTTTTCT	1	unique	GATC	DDB_G0267686	-	DDB_G0267686	member of the TKL (tyrosine kinase-like) group%3B belongs to the ARK (ankyrin repeat-containing kinase) family%2C although it does not contain ankyrin repeats%3B contains an RGS (Regulator of G protein Signaling) domain	NA	NA	NA	NA	NA	NA
DDB0232428	570311	TTTATTATAATTTCTGGATC	1	GATCTATATTTTGTAATTTT	1	unique	GATC	DDB_G0267686	-	DDB_G0267686	member of the TKL (tyrosine kinase-like) group%3B belongs to the ARK (ankyrin repeat-containing kinase) family%2C although it does not contain ankyrin repeats%3B contains an RGS (Regulator of G protein Signaling) domain	NA	NA	NA	NA	NA	NA
DDB0232428	570809	AATGATGCCTCTTCTTGATC	1	GATCTAACTCGATTGGATAT	1	unique	GATC	DDB_G0267686	-	DDB_G0267686	member of the TKL (tyrosine kinase-like) group%3B belongs to the ARK (ankyrin repeat-containing kinase) family%2C although it does not contain ankyrin repeats%3B contains an RGS (Regulator of G protein Signaling) domain	NA	NA	NA	NA	NA	NA
DDB0232428	570891	GGTATGATGTATTGGTGATC	1	GATCGAATCTAGTAATGAAA	1	unique	GATC	DDB_G0267686	-	DDB_G0267686	member of the TKL (tyrosine kinase-like) group%3B belongs to the ARK (ankyrin repeat-containing kinase) family%2C although it does not contain ankyrin repeats%3B contains an RGS (Regulator of G protein Signaling) domain	NA	NA	NA	NA	NA	NA
DDB0232428	572519	TGGTTTTTCCTATTTAGATC	1	GATCTAAATCTTTTTTAATT	1	unique	GATC	NA	NA	NA	NA	DDB_G0267686	DDB_G0268498	-	-	1449	822
DDB0232428	572902	GGCTACTTTTTTTTTTGATC	1	GATCAAAAAGAGTAAAAATA	1	unique	GATC	NA	NA	NA	NA	DDB_G0267686	DDB_G0268498	-	-	1832	439
DDB0232428	573104	CAACATTTCATAGCCTGATC	1	GATCGCGTGATTGATTAAAG	1	unique	GATC	NA	NA	NA	NA	DDB_G0267686	DDB_G0268498	-	-	2034	237
DDB0232428	573123	CGCGTGATTGATTAAAGATC	1	GATCTTTAAAGCTCATTTGT	1	unique	GATC	NA	NA	NA	NA	DDB_G0267686	DDB_G0268498	-	-	2053	218
DDB0232428	573210	TTTTTTCCAAATTTAAGATC	1	GATCCCTAAAAATAAATATT	1	unique	GATC	NA	NA	NA	NA	DDB_G0267686	DDB_G0268498	-	-	2140	131
DDB0232428	574081	TCTCTTTCTCTCTCGAGATC	1	GATCACCAAATTGTCTTTCG	1	unique	GATC	DDB_G0268498	-	DDB_G0268498	NA	NA	NA	NA	NA	NA	NA
DDB0232428	574691	ATTCACGTTCTTCGTCGATC	1	GATCACTTGATTCAAACGTT	1	unique	GATC	DDB_G0268498	-	DDB_G0268498	NA	NA	NA	NA	NA	NA	NA
DDB0232428	574861	GTACGTGCTGTCATTGGATC	1	GATCTAATTGACCTGGTGAA	1	unique	GATC	DDB_G0268498	-	DDB_G0268498	NA	NA	NA	NA	NA	NA	NA
DDB0232428	575233	ATTGATTCAATTGGTTGATC	1	GATCTATTTATTAATTAATT	1	unique	GATC	DDB_G0268498	-	DDB_G0268498	NA	NA	NA	NA	NA	NA	NA
DDB0232428	575423	GATGCTAAAGTTTCATGATC	1	GATCATTCATAATGAAACCT	1	unique	GATC	DDB_G0268498	-	DDB_G0268498	NA	NA	NA	NA	NA	NA	NA
DDB0232428	575471	ATCCAAAATCTCTTTGGATC	1	GATCTGGAATCATTTGTTTC	1	unique	GATC	DDB_G0268498	-	DDB_G0268498	NA	NA	NA	NA	NA	NA	NA
DDB0232428	575764	ATTGAGAATAACATATGATC	1	GATCACCTTCCCATATTTCT	1	unique	GATC	DDB_G0268498	-	DDB_G0268498	NA	NA	NA	NA	NA	NA	NA
DDB0232428	576043	AAACTTACAGCAATTTGATC	1	GATCTAATTGTTCAGTTGAA	1	unique	GATC	DDB_G0268498	-	DDB_G0268498	NA	NA	NA	NA	NA	NA	NA
DDB0232428	576078	AGCACCACTTGAAACTGATC	1	GATCCAATTCTAAAGCCTCC	1	unique	GATC	DDB_G0268498	-	DDB_G0268498	NA	NA	NA	NA	NA	NA	NA
DDB0232428	577470	AACTAAAAATAAAATTGATC	1	GATCAGTTTTTGGGTGTATA	1	unique	GATC	NA	NA	NA	NA	DDB_G0268498	DDB_G0268310	-	+	1298	346
DDB0232428	579506	TAAATTTTAAAATATGGATC	1	GATCACTCGATAGTAAATCC	1	unique	GATC	DDB_G0267688	-	cpnD	Ca(2%2B)-dependent phospholipid-binding protein%3B contains two C2 domains and a VWFA domain.	NA	NA	NA	NA	NA	NA
DDB0232428	579607	TGTTGAAATTGTAATTGATC	1	GATCCTGATAAAATACCATT	1	unique	GATC	DDB_G0267688	-	cpnD	Ca(2%2B)-dependent phospholipid-binding protein%3B contains two C2 domains and a VWFA domain.	NA	NA	NA	NA	NA	NA
DDB0232428	579673	AGGACTTGACAAAATTGATC	1	GATCCTAATGATACATTCTA	1	unique	GATC	DDB_G0267688	-	cpnD	Ca(2%2B)-dependent phospholipid-binding protein%3B contains two C2 domains and a VWFA domain.	NA	NA	NA	NA	NA	NA
DDB0232428	579775	TCACCAATTAAATCATGATC	1	GATCATCAAAATCTTTTAAT	1	unique	GATC	DDB_G0267688	-	cpnD	Ca(2%2B)-dependent phospholipid-binding protein%3B contains two C2 domains and a VWFA domain.	NA	NA	NA	NA	NA	NA
DDB0232428	579976	TAAACAATGGCTTGAGGATC	1	GATCACTTTGACTTAATAAA	1	unique	GATC	DDB_G0267688	-	cpnD	Ca(2%2B)-dependent phospholipid-binding protein%3B contains two C2 domains and a VWFA domain.	NA	NA	NA	NA	NA	NA
DDB0232428	582016	ACAACAAGTATTATCGGATC	1	GATCAACAAAACCAATTCCA	1	unique	GATC	DDB_G0267690	+	icpA	homolog of INCENP involved in various cellular processes%3B contains the IN-box domain known to bind Aurora B kinase%3B null mutant has defects in cytokinesis%2C chromosome segregation%2C and spindle organization	NA	NA	NA	NA	NA	NA
DDB0232428	582382	ATTGAAAACTCATCAAGATC	1	GATCAAATTAACAAACAAGA	1	unique	GATC	DDB_G0267690	+	icpA	homolog of INCENP involved in various cellular processes%3B contains the IN-box domain known to bind Aurora B kinase%3B null mutant has defects in cytokinesis%2C chromosome segregation%2C and spindle organization	NA	NA	NA	NA	NA	NA
DDB0232428	582514	ATCAAAATTATCTTCTGATC	1	GATCAAGACCAAATTAAAAA	1	unique	GATC	DDB_G0267690	+	icpA	homolog of INCENP involved in various cellular processes%3B contains the IN-box domain known to bind Aurora B kinase%3B null mutant has defects in cytokinesis%2C chromosome segregation%2C and spindle organization	NA	NA	NA	NA	NA	NA
DDB0232428	582556	CTTACAACAAGAATCTGATC	1	GATCTTTTAAAAAAACAACA	1	unique	GATC	DDB_G0267690	+	icpA	homolog of INCENP involved in various cellular processes%3B contains the IN-box domain known to bind Aurora B kinase%3B null mutant has defects in cytokinesis%2C chromosome segregation%2C and spindle organization	NA	NA	NA	NA	NA	NA
DDB0232428	583633	GAAAAAAGAAGCTGAAGATC	1	GATCGTGAATTGGCTAGAAA	1	unique	GATC	DDB_G0267690	+	icpA	homolog of INCENP involved in various cellular processes%3B contains the IN-box domain known to bind Aurora B kinase%3B null mutant has defects in cytokinesis%2C chromosome segregation%2C and spindle organization	NA	NA	NA	NA	NA	NA
DDB0232428	583946	CCACAAACTCCAAGTAGATC	1	GATCAGCAAATAATAATTAT	1	unique	GATC	DDB_G0267690	+	icpA	homolog of INCENP involved in various cellular processes%3B contains the IN-box domain known to bind Aurora B kinase%3B null mutant has defects in cytokinesis%2C chromosome segregation%2C and spindle organization	NA	NA	NA	NA	NA	NA
DDB0232428	584170	ATATCAAGATGATTCTGATC	1	GATCAAGAGATTGAAGAACA	1	unique	GATC	DDB_G0267690	+	icpA	homolog of INCENP involved in various cellular processes%3B contains the IN-box domain known to bind Aurora B kinase%3B null mutant has defects in cytokinesis%2C chromosome segregation%2C and spindle organization	NA	NA	NA	NA	NA	NA
DDB0232428	584398	AGAAGAACCAGAGAGGGATC	1	GATCCAGTATTCCTTACTCC	1	unique	GATC	DDB_G0267690	+	icpA	homolog of INCENP involved in various cellular processes%3B contains the IN-box domain known to bind Aurora B kinase%3B null mutant has defects in cytokinesis%2C chromosome segregation%2C and spindle organization	NA	NA	NA	NA	NA	NA
DDB0232428	585112	ACAACAAAGATTCTATGATC	1	GATCCAGATCGTATCTTTTC	1	unique	GATC	DDB_G0267690	+	icpA	homolog of INCENP involved in various cellular processes%3B contains the IN-box domain known to bind Aurora B kinase%3B null mutant has defects in cytokinesis%2C chromosome segregation%2C and spindle organization	NA	NA	NA	NA	NA	NA
DDB0232428	585118	AAGATTCTATGATCCAGATC	1	GATCGTATCTTTTCAATGAT	1	unique	GATC	DDB_G0267690	+	icpA	homolog of INCENP involved in various cellular processes%3B contains the IN-box domain known to bind Aurora B kinase%3B null mutant has defects in cytokinesis%2C chromosome segregation%2C and spindle organization	NA	NA	NA	NA	NA	NA
DDB0232428	585816	AGAACACTAAAATTTGGATC	1	GATCCAATTCAATTGATTGT	1	unique	GATC	DDB_G0295847	-	DDB_G0295847	contains one transmembrane domain at the carboxyl terminal	NA	NA	NA	NA	NA	NA
DDB0232428	586948	ATTTATAACCAAAAATGATC	1	GATCAAAGAATTAATATTAT	1	unique	GATC	DDB_G0295847	-	DDB_G0295847	contains one transmembrane domain at the carboxyl terminal	NA	NA	NA	NA	NA	NA
DDB0232428	586969	AAGAATTAATATTATCGATC	1	GATCAAATTTACACTTTCAA	1	unique	GATC	DDB_G0295847	-	DDB_G0295847	contains one transmembrane domain at the carboxyl terminal	NA	NA	NA	NA	NA	NA
DDB0232428	587826	ATTGAAAGCTCTGAAAGATC	1	GATCTCCCAAGAAAGAATAA	1	unique	GATC	DDB_G0295847	-	DDB_G0295847	contains one transmembrane domain at the carboxyl terminal	NA	NA	NA	NA	NA	NA
DDB0232428	587999	TGATATTGGTTTATTTGATC	1	GATCTATAAGTATCTATACC	1	unique	GATC	DDB_G0295847	-	DDB_G0295847	contains one transmembrane domain at the carboxyl terminal	NA	NA	NA	NA	NA	NA
DDB0232428	588060	ATATTACTAATAGATGGATC	1	GATCTGATAATTTAATATAC	1	unique	GATC	DDB_G0295847	-	DDB_G0295847	contains one transmembrane domain at the carboxyl terminal	NA	NA	NA	NA	NA	NA
DDB0232428	588255	TTCATATTTGTTGCATGATC	1	GATCTGAAATTTGAATGTCA	1	unique	GATC	DDB_G0295847	-	DDB_G0295847	contains one transmembrane domain at the carboxyl terminal	NA	NA	NA	NA	NA	NA
DDB0232428	588815	TACACGAATTAATGATGATC	1	GATCCCATTGATAATTGACC	1	unique	GATC	DDB_G0295847	-	DDB_G0295847	contains one transmembrane domain at the carboxyl terminal	NA	NA	NA	NA	NA	NA
DDB0232428	588902	TCTCATGTTTAGTGTTGATC	1	GATCCCTTTTGTACAAAACC	1	unique	GATC	DDB_G0295847	-	DDB_G0295847	contains one transmembrane domain at the carboxyl terminal	NA	NA	NA	NA	NA	NA
DDB0232428	589110	AGTAAAATAAATGACTGATC	1	GATCATACTTTAATTCAGTT	1	unique	GATC	DDB_G0295847	-	DDB_G0295847	contains one transmembrane domain at the carboxyl terminal	NA	NA	NA	NA	NA	NA
DDB0232428	589133	CTTTAATTCAGTTGATGATC	1	GATCCAGCTTTTAATTGTTG	1	unique	GATC	DDB_G0295847	-	DDB_G0295847	contains one transmembrane domain at the carboxyl terminal	NA	NA	NA	NA	NA	NA
DDB0232428	589417	TAAATTGTATAATGTGGATC	1	GATCAATATCTAAATAATAT	1	unique	GATC	DDB_G0295847	-	DDB_G0295847	contains one transmembrane domain at the carboxyl terminal	NA	NA	NA	NA	NA	NA
DDB0232428	589438	ATATCTAAATAATATTGATC	1	GATCTTTATTAACATCTTGG	1	unique	GATC	DDB_G0295847	-	DDB_G0295847	contains one transmembrane domain at the carboxyl terminal	NA	NA	NA	NA	NA	NA
DDB0232428	589789	GTTTTTTTTATAGTAAGATC	1	GATCAAATTGTTTAATGGCA	1	unique	GATC	DDB_G0295847	-	DDB_G0295847	contains one transmembrane domain at the carboxyl terminal	NA	NA	NA	NA	NA	NA
DDB0232428	589948	ACTTTTTTGCAAACATGATC	1	GATCCACAGCATATGAATTA	1	unique	GATC	NA	NA	NA	NA	DDB_G0295847	DDB_G0268500	-	-	120	736
DDB0232428	589974	ATATGAATTAAAATTTGATC	1	GATCTAACAACTTCGTCTAT	1	unique	GATC	NA	NA	NA	NA	DDB_G0295847	DDB_G0268500	-	-	146	710
DDB0232428	590138	AAAAAAATAAAAAAATGATC	7	GATCAAAAAAAAAAAAAAAA	134	not_unique	GATC	NA	NA	NA	NA	DDB_G0295847	DDB_G0268500	-	-	310	546
DDB0232428	590348	ACAATATCTATCTTTTGATC	1	GATCAAAAAAAAAAAAAAAA	134	unique_one	GATC	NA	NA	NA	NA	DDB_G0295847	DDB_G0268500	-	-	520	336
DDB0232428	592416	ATCTGCAGAATAATCTGATC	1	GATCTATAAGTTGATCTATT	1	unique	GATC	DDB_G0268500	-	DDB_G0268500	NA	NA	NA	NA	NA	NA	NA
DDB0232428	592428	ATCTGATCTATAAGTTGATC	1	GATCTATTTACATAATATCT	1	unique	GATC	DDB_G0268500	-	DDB_G0268500	NA	NA	NA	NA	NA	NA	NA
DDB0232428	592459	TATCTTGTAGCATACTGATC	1	GATCAACCATCTCCTGAACA	1	unique	GATC	DDB_G0268500	-	DDB_G0268500	NA	NA	NA	NA	NA	NA	NA
DDB0232428	592747	TTATTAATATTATTTTGATC	3	GATCATGTATTTGATTTTGA	2	not_unique	GATC	DDB_G0268500	-	DDB_G0268500	NA	NA	NA	NA	NA	NA	NA
DDB0232428	592777	TTTTGAATTTGATTTTGATC	2	GATCAATTGATTTAATTAAA	1	unique_one	GATC	DDB_G0268500	-	DDB_G0268500	NA	NA	NA	NA	NA	NA	NA
DDB0232428	592891	TTTAAAGAGAAATCAGGATC	1	GATCATCATTAATTTGTTCT	1	unique	GATC	DDB_G0268500	-	DDB_G0268500	NA	NA	NA	NA	NA	NA	NA
DDB0232428	594222	TAATTTTAATTGAGTTGATC	1	GATCTTGATTTTAAAGCCAT	1	unique	GATC	DDB_G0268500	-	DDB_G0268500	NA	NA	NA	NA	NA	NA	NA
DDB0232428	594373	ATCTCTTTAGTTACTTGATC	1	GATCATCTATGAATCTAAAA	1	unique	GATC	DDB_G0268500	-	DDB_G0268500	NA	NA	NA	NA	NA	NA	NA
DDB0232428	594627	AATAAACATTTCAACCGATC	1	GATCTATTATTAATATGTAT	1	unique	GATC	DDB_G0268500	-	DDB_G0268500	NA	NA	NA	NA	NA	NA	NA
DDB0232428	596499	AAATATTTTTGATAAAGATC	1	GATCTAAAGTTCTTTCATAT	1	unique	GATC	DDB_G0268502	-	DDB_G0268502	NA	NA	NA	NA	NA	NA	NA
DDB0232428	597791	GTGTCTTAATAATGATGATC	1	GATCTATAGGACAATATATC	1	unique	GATC	DDB_G0268502	-	DDB_G0268502	NA	NA	NA	NA	NA	NA	NA
DDB0232428	598955	TTCTTGATGTTGATTGGATC	1	GATCTGTTTTGTTTTGTTTG	1	unique	GATC	NA	NA	NA	NA	DDB_G0268502	DDB_G0267692	-	+	454	1295
DDB0232428	599369	TTGTAAAATGTAACTTGATC	1	GATCAATTTTATAAAAAATA	1	unique	GATC	NA	NA	NA	NA	DDB_G0268502	DDB_G0267692	-	+	868	881
DDB0232428	599818	TATAATTCAGGTGATTGATC	1	GATCAGGAAAATCAATTTTT	1	unique	GATC	NA	NA	NA	NA	DDB_G0268502	DDB_G0267692	-	+	1317	432
DDB0232428	600235	TTTTTTTTTCTTTGTTGATC	1	GATCTCAAAAATAAAAAAAT	1	unique	GATC	NA	NA	NA	NA	DDB_G0268502	DDB_G0267692	-	+	1734	15
DDB0232428	600415	GGATTATATTGATTGTGATC	1	GATCCCCAAACAGGTTCAGT	1	unique	GATC	DDB_G0267692	+	DDB_G0267692	has a predicted signal peptide and a C-terminal transmembrane domain	NA	NA	NA	NA	NA	NA
DDB0232428	601909	ACAAGACATTGGATATGATC	1	GATCCTCGTAATTGGTTAGT	1	unique	GATC	DDB_G0267692	+	DDB_G0267692	has a predicted signal peptide and a C-terminal transmembrane domain	NA	NA	NA	NA	NA	NA
DDB0232428	603463	ATCATCATCATCATTAGATC	1	GATCAAATTGAACATATATT	2	unique_one	GATC	DDB_G0267692	+	DDB_G0267692	has a predicted signal peptide and a C-terminal transmembrane domain	NA	NA	NA	NA	NA	NA
DDB0232428	603937	AAAAGAATGTTTGATTGATC	1	GATCCTGGTATGATTTTTAT	1	unique	GATC	DDB_G0267692	+	DDB_G0267692	has a predicted signal peptide and a C-terminal transmembrane domain	NA	NA	NA	NA	NA	NA
DDB0232428	604740	AAAAATGATATCATTTGATC	1	GATCACAATTATACAAATTT	1	unique	GATC	DDB_G0268314	+	DDB_G0268314	NA	NA	NA	NA	NA	NA	NA
DDB0232428	604878	ATATGGCACAACAATTGATC	1	GATCTAAATGAATTATGTGA	1	unique	GATC	DDB_G0268314	+	DDB_G0268314	NA	NA	NA	NA	NA	NA	NA
DDB0232428	605386	ATCTACTGGGGAAATTGATC	1	GATCAAACAATATTAAATTT	1	unique	GATC	DDB_G0268314	+	DDB_G0268314	NA	NA	NA	NA	NA	NA	NA
DDB0232428	605467	CGTTTGGTTAGTTTGTGATC	1	GATCCAATTACACTAGGAAC	1	unique	GATC	DDB_G0268314	+	DDB_G0268314	NA	NA	NA	NA	NA	NA	NA
DDB0232428	606504	ACAAGATATAGGATATGATC	1	GATCCACGTAATTGGCTTCT	1	unique	GATC	DDB_G0268314	+	DDB_G0268314	NA	NA	NA	NA	NA	NA	NA
DDB0232428	606951	TCAAAATACTATTAATGATC	1	GATCAACAATGTCCAAATGG	1	unique	GATC	DDB_G0268314	+	DDB_G0268314	NA	NA	NA	NA	NA	NA	NA
DDB0232428	608070	ATCACCATCATCATTAGATC	1	GATCAAATTGAACATATATT	2	unique_one	GATC	DDB_G0268314	+	DDB_G0268314	NA	NA	NA	NA	NA	NA	NA
DDB0232428	608550	AAAAGAATGTGTAATTGATC	1	GATCCTGGTATGATTTTTTT	1	unique	GATC	DDB_G0268314	+	DDB_G0268314	NA	NA	NA	NA	NA	NA	NA
DDB0232428	608901	CACATTTAATTATCAAGATC	1	GATCATTGGCTTTTAAAAAA	1	unique	GATC	NA	NA	NA	NA	DDB_G0268314	DDB_G0267430	+	+	61	245
DDB0232428	608984	TTAATGAAAATATCGTGATC	1	GATCAATCGTTATCTCACAC	1	unique	GATC	NA	NA	NA	NA	DDB_G0268314	DDB_G0267430	+	+	144	162
DDB0232428	609405	ATTGGTGGTGTGCCAGGATC	1	GATCAATATGTGGCTTTTGT	1	unique	GATC	DDB_G0267430	+	abcG20	half transporter%2C consisting of one ABC domain and one transmembrane domain	NA	NA	NA	NA	NA	NA
DDB0232428	609461	TTATGATTTAACCTTGGATC	1	GATCATACATTAAATTTCTT	1	unique	GATC	DDB_G0267430	+	abcG20	half transporter%2C consisting of one ABC domain and one transmembrane domain	NA	NA	NA	NA	NA	NA
DDB0232428	609792	ATTTGGAGTTATTTAAGATC	1	GATCATTAGCAAATTCAGGA	1	unique	GATC	DDB_G0267430	+	abcG20	half transporter%2C consisting of one ABC domain and one transmembrane domain	NA	NA	NA	NA	NA	NA
DDB0232428	611610	TGATATAACTGATGATGATC	1	GATCATCTTTAATCCAAATT	1	unique	GATC	DDB_G0267694	-	DDB_G0267694	NA	NA	NA	NA	NA	NA	NA
DDB0232428	612401	TTTATTTTTAATAAATGATC	1	GATCGATTTACAATATTTGG	1	unique	GATC	DDB_G0267694	-	DDB_G0267694	NA	NA	NA	NA	NA	NA	NA
DDB0232428	613321	AAAAAAAAAAAAAAAAGATC	89	GATCAAAATATTTTTTTCAA	1	unique_one	GATC	NA	NA	NA	NA	DDB_G0267694	DDB_G0268316	-	-	133	71
DDB0232428	613744	ACTGAATTTATTTGGTGATC	1	GATCCAATTGAATTTGATGA	1	unique	GATC	DDB_G0268316	-	DDB_G0268316	NA	NA	NA	NA	NA	NA	NA
DDB0232428	614131	ATATATACAAAATGTTGATC	1	GATCTATTTACTCTACTTGC	1	unique	GATC	DDB_G0268316	-	DDB_G0268316	NA	NA	NA	NA	NA	NA	NA
DDB0232428	615275	TTAAGTTGTTCAATTGGATC	1	GATCCAATTCATCATTAGAA	1	unique	GATC	DDB_G0268316	-	DDB_G0268316	NA	NA	NA	NA	NA	NA	NA
DDB0232428	615301	ATCATTAGAATGCTCTGATC	1	GATCCAGTATTAAATAATCC	1	unique	GATC	DDB_G0268316	-	DDB_G0268316	NA	NA	NA	NA	NA	NA	NA
DDB0232428	618515	TACGAAGACATTTTATGATC	1	GATCACAAAAATAACTTTTA	1	unique	GATC	NA	NA	NA	NA	DDB_G0268316	DDB_G0267696	-	-	915	3824
DDB0232428	618771	ATGACACAAGAACAAGGATC	1	GATCTTTTTTTCCTTTTTTT	1	unique	GATC	NA	NA	NA	NA	DDB_G0268316	DDB_G0267696	-	-	1171	3568
DDB0232428	620459	TAAATTAAACATGAATGATC	1	GATCGCATACCATATTTTAA	1	unique	GATC	NA	NA	NA	NA	DDB_G0268316	DDB_G0267696	-	-	2859	1880
DDB0232428	622069	TTTTTTTTATTTTTTTGATC	10	GATCACTTGAAAAGGTAGTA	1	unique_one	GATC	NA	NA	NA	NA	DDB_G0268316	DDB_G0267696	-	-	4469	270
DDB0232428	623048	CTTTTTTGATTTAATTGATC	1	GATCATGTAATAGGTTTTTT	1	unique	GATC	NA	NA	NA	NA	DDB_G0267696	DDB_G0267698	-	-	94	482
DDB0232428	623604	CCCATATTTCTAGCAAGATC	1	GATCGGCTGCCATTTCTGAT	1	unique	GATC	DDB_G0267698	-	DDB_G0267698	NA	NA	NA	NA	NA	NA	NA
DDB0232428	623621	ATCGGCTGCCATTTCTGATC	1	GATCTTTTTCCTTTTAAACA	1	unique	GATC	DDB_G0267698	-	DDB_G0267698	NA	NA	NA	NA	NA	NA	NA
DDB0232428	624745	ATTGCCATTGAAATTGGATC	1	GATCAATTACAATTGGTAGA	1	unique	GATC	DDB_G0267700	-	DDB_G0267700	NA	NA	NA	NA	NA	NA	NA
DDB0232428	627584	AAAAAACTCATTGAGTGATC	1	GATCTAGAATCAATGAAAAG	1	unique	GATC	DDB_G0268318	+	DDB_G0268318	NA	NA	NA	NA	NA	NA	NA
DDB0232428	627687	AATAAAATAGCACAAAGATC	1	GATCAAATAATGTAATCTCA	1	unique	GATC	DDB_G0268318	+	DDB_G0268318	NA	NA	NA	NA	NA	NA	NA
DDB0232428	627716	AATCTCAGGTTATGTTGATC	1	GATCTTGAAAAAGAAGCCAA	1	unique	GATC	DDB_G0268318	+	DDB_G0268318	NA	NA	NA	NA	NA	NA	NA
DDB0232428	628181	TTACTCTAAAACTAAAGATC	1	GATCTTTTGACAAACTCTAA	1	unique	GATC	DDB_G0268318	+	DDB_G0268318	NA	NA	NA	NA	NA	NA	NA
DDB0232428	629619	ACCTGCTGATGATAATGATC	1	GATCCATCACCACTTTCATA	1	unique	GATC	DDB_G0267472	-	roco7	member of the TKL (tyrosine kinase-like) group and the ROCO family of protein kinases%3B contains Roc%2C COR%2C WD40%2C and protein kinase domains%3B related to LRR-containing kinases but does not contain an LRR domain	NA	NA	NA	NA	NA	NA
DDB0232428	629649	TTCATAAACACTTGAAGATC	1	GATCCTGAATTTGATTGTGA	1	unique	GATC	DDB_G0267472	-	roco7	member of the TKL (tyrosine kinase-like) group and the ROCO family of protein kinases%3B contains Roc%2C COR%2C WD40%2C and protein kinase domains%3B related to LRR-containing kinases but does not contain an LRR domain	NA	NA	NA	NA	NA	NA
DDB0232428	629688	TGAATGTGGTGTTGATGATC	1	GATCCATTTTGTTGATGTTG	1	unique	GATC	DDB_G0267472	-	roco7	member of the TKL (tyrosine kinase-like) group and the ROCO family of protein kinases%3B contains Roc%2C COR%2C WD40%2C and protein kinase domains%3B related to LRR-containing kinases but does not contain an LRR domain	NA	NA	NA	NA	NA	NA
DDB0232428	630073	TGTTGTTGATTTATTTGATC	1	GATCTTCATTAATTGGTGGT	1	unique	GATC	DDB_G0267472	-	roco7	member of the TKL (tyrosine kinase-like) group and the ROCO family of protein kinases%3B contains Roc%2C COR%2C WD40%2C and protein kinase domains%3B related to LRR-containing kinases but does not contain an LRR domain	NA	NA	NA	NA	NA	NA
DDB0232428	630190	GATGGTCTTTTCTTTGGATC	1	GATCACCACTCCAACAATCT	1	unique	GATC	DDB_G0267472	-	roco7	member of the TKL (tyrosine kinase-like) group and the ROCO family of protein kinases%3B contains Roc%2C COR%2C WD40%2C and protein kinase domains%3B related to LRR-containing kinases but does not contain an LRR domain	NA	NA	NA	NA	NA	NA
[truncated: 116,788 more rows]

## Sheet: Sites per Gene
Gene	Name	DpnII	NlaIII	Total	Promoter
DDB_G0267186	DDB_G0267186_RTE	1	0	1	y
DDB_G0267202	DDB_G0267202_TE	1	0	1	y
DDB_G0267218	DDB_G0267218	1	0	1	y
DDB_G0267248	DDB_G0267248_RTE	1	0	1	y
DDB_G0267322	DDB_G0267322_RTE	1	0	1	y
DDB_G0267372	DDB_G0267372_RTE	1	0	1	y
DDB_G0267510	DDB_G0267510	1	0	1	n
DDB_G0267564	DDB_G0267564	1	0	1	n
DDB_G0267576	DDB_G0267576	1	0	1	n
DDB_G0267670	DDB_G0267670	1	0	1	y
DDB_G0267680	DDB_G0267680	1	0	1	n
DDB_G0267700	DDB_G0267700	1	0	1	y
DDB_G0267712	DDB_G0267712	1	0	1	n
DDB_G0267866	DDB_G0267866	1	0	1	y
DDB_G0267920	DDB_G0267920	1	0	1	y
DDB_G0267992	DDB_G0267992	1	0	1	n
DDB_G0268022	DDB_G0268022	1	0	1	n
DDB_G0268124	DDB_G0268124_ps	1	0	1	n
DDB_G0268128	DDB_G0268128_RTE	1	0	1	y
DDB_G0268200	DDB_G0268200	1	0	1	n
DDB_G0268264	DDB_G0268264	1	0	1	n
DDB_G0268278	DDB_G0268278	1	0	1	n
DDB_G0268382	DDB_G0268382	1	0	1	y
DDB_G0268422	DDB_G0268422	1	0	1	y
DDB_G0268726	DDB_G0268726_ps	1	0	1	y
DDB_G0268732	DDB_G0268732	1	0	1	y
DDB_G0268812	DDB_G0268812	1	0	1	y
DDB_G0268830	DDB_G0268830	1	0	1	y
DDB_G0268842	DDB_G0268842	1	0	1	y
DDB_G0268874	DDB_G0268874	1	0	1	y
DDB_G0268962	DDB_G0268962	1	0	1	y
DDB_G0268980	DDB_G0268980_ps	1	0	1	n
DDB_G0268982	DDB_G0268982	1	0	1	y
DDB_G0268990	DDB_G0268990	1	0	1	n
DDB_G0269000	DDB_G0269000	1	0	1	n
DDB_G0269030	DDB_G0269030_RTE	1	0	1	n
DDB_G0269070	DDB_G0269070	1	0	1	y
DDB_G0269302	DDB_G0269302	1	0	1	n
DDB_G0269320	DDB_G0269320_ps	1	0	1	y
DDB_G0269338	bzpE	1	0	1	y
DDB_G0269390	DDB_G0269390	1	0	1	n
DDB_G0269456	DDB_G0269456	1	0	1	n
DDB_G0269464	DDB_G0269464	1	0	1	n
DDB_G0269498	DDB_G0269498	1	0	1	n
DDB_G0269616	aplG	1	0	1	y
DDB_G0269776	DDB_G0269776	1	0	1	n
DDB_G0269804	DDB_G0269804	1	0	1	y
DDB_G0269808	DDB_G0269808	1	0	1	n
DDB_G0269812	DDB_G0269812	1	0	1	n
DDB_G0269844	DDB_G0269844	1	0	1	y
DDB_G0269846	DDB_G0269846	1	0	1	y
DDB_G0269930	DDB_G0269930	1	0	1	y
DDB_G0269974	DDB_G0269974	1	0	1	n
DDB_G0269984	DDB_G0269984	1	0	1	y
DDB_G0269988	DDB_G0269988	1	0	1	n
DDB_G0270090	DDB_G0270090	1	0	1	n
DDB_G0270092	DDB_G0270092	1	0	1	n
DDB_G0270136	DDB_G0270136	1	0	1	y
DDB_G0270158	DDB_G0270158	1	0	1	y
DDB_G0270236	DDB_G0270236	1	0	1	n
DDB_G0270244	DDB_G0270244	1	0	1	y
DDB_G0270360	bud31	1	0	1	y
DDB_G0270494	DDB_G0270494	1	0	1	y
DDB_G0270504	DDB_G0270504_RTE	1	0	1	y
DDB_G0270510	spc2	1	0	1	y
DDB_G0270518	DDB_G0270518	1	0	1	y
DDB_G0270558	DDB_G0270558	1	0	1	y
DDB_G0270570	DDB_G0270570	1	0	1	n
DDB_G0270602	drnA_ps	1	0	1	n
DDB_G0270620	DDB_G0270620	1	0	1	n
DDB_G0270634	DDB_G0270634	1	0	1	y
DDB_G0270690	DDB_G0270690	1	0	1	n
DDB_G0270724	DDB_G0270724_ps	1	0	1	y
DDB_G0270758	DDB_G0270758	1	0	1	n
DDB_G0270772	DDB_G0270772	1	0	1	n
DDB_G0270812	DDB_G0270812	1	0	1	y
DDB_G0270884	abnA	1	0	1	n
DDB_G0270974	DDB_G0270974	1	0	1	y
DDB_G0270982	DDB_G0270982	1	0	1	n
DDB_G0270998	DDB_G0270998_ps	1	0	1	y
DDB_G0271030	DDB_G0271030_ps	1	0	1	y
DDB_G0271038	DDB_G0271038	1	0	1	n
DDB_G0271070	DDB_G0271070	1	0	1	y
DDB_G0271080	DDB_G0271080	1	0	1	n
DDB_G0271098	DDB_G0271098	1	0	1	n
DDB_G0271114	DDB_G0271114	1	0	1	n
DDB_G0271128	DDB_G0271128_ps	1	0	1	y
DDB_G0271162	DDB_G0271162	1	0	1	n
DDB_G0271212	DDB_G0271212	1	0	1	n
DDB_G0271220	DDB_G0271220	1	0	1	y
DDB_G0271252	DDB_G0271252	1	0	1	n
DDB_G0271318	DDB_G0271318	1	0	1	n
DDB_G0271484	DDB_G0271484	1	0	1	n
DDB_G0271486	DDB_G0271486	1	0	1	n
DDB_G0271526	DDB_G0271526	1	0	1	y
DDB_G0271656	DDB_G0271656	1	0	1	n
DDB_G0271698	DDB_G0271698	1	0	1	n
DDB_G0271720	DDB_G0271720	1	0	1	n
DDB_G0271726	DDB_G0271726	1	0	1	y
DDB_G0271756	DDB_G0271756	1	0	1	n
DDB_G0271804	DDB_G0271804	1	0	1	y
DDB_G0271958	DDB_G0271958	1	0	1	n
DDB_G0272126	DDB_G0272126	1	0	1	n
DDB_G0272194	DDB_G0272194	1	0	1	n
DDB_G0272222	ybl1	1	0	1	n
DDB_G0272262	DDB_G0272262	1	0	1	n
DDB_G0272280	DDB_G0272280	1	0	1	n
DDB_G0272316	DDB_G0272316	1	0	1	y
DDB_G0272376	DDB_G0272376	1	0	1	y
DDB_G0272424	DDB_G0272424	1	0	1	y
DDB_G0272564	psmD8-1	1	0	1	y
DDB_G0272596	DDB_G0272596	1	0	1	y
DDB_G0272636	DDB_G0272636	1	0	1	y
DDB_G0272664	DDB_G0272664	1	0	1	y
DDB_G0272712	mocos_ps	1	0	1	n
DDB_G0272843	DDB_G0272843	1	0	1	n
DDB_G0272853	DDB_G0272853	1	0	1	y
DDB_G0272857	rapB	1	0	1	y
DDB_G0272861	cosA	1	0	1	y
DDB_G0273023	DDB_G0273023	1	0	1	n
DDB_G0273029	DDB_G0273029	1	0	1	y
DDB_G0273039	iptC-1	1	0	1	n
DDB_G0273049	DDB_G0273049	1	0	1	n
DDB_G0273069	ndkC-1	1	0	1	n
DDB_G0273109	DDB_G0273109	1	0	1	y
DDB_G0273113	DDB_G0273113	1	0	1	n
DDB_G0273167	DDB_G0273167	1	0	1	y
DDB_G0273179	DDB_G0273179	1	0	1	n
DDB_G0273237	DDB_G0273237	1	0	1	n
DDB_G0273255	DDB_G0273255	1	0	1	n
DDB_G0273269	DDB_G0273269_ps	1	0	1	n
DDB_G0273289	DDB_G0273289	1	0	1	y
DDB_G0273311	DDB_G0273311	1	0	1	n
DDB_G0273313	DDB_G0273313	1	0	1	n
DDB_G0273387	DDB_G0273387	1	0	1	n
DDB_G0273585	DDB_G0273585	1	0	1	n
DDB_G0273613	DDB_G0273613	1	0	1	n
DDB_G0273627	DDB_G0273627	1	0	1	n
DDB_G0273637	DDB_G0273637	1	0	1	n
DDB_G0273659	DDB_G0273659	1	0	1	y
DDB_G0273661	DDB_G0273661	1	0	1	y
DDB_G0273673	DDB_G0273673	1	0	1	n
DDB_G0273747	DDB_G0273747	1	0	1	y
DDB_G0273785	DDB_G0273785	1	0	1	y
DDB_G0273805	ndkC-2	1	0	1	n
DDB_G0273819	DDB_G0273819	1	0	1	n
DDB_G0273851	DDB_G0273851	1	0	1	n
DDB_G0273889	DDB_G0273889_ps	1	0	1	n
DDB_G0273905	DDB_G0273905	1	0	1	y
DDB_G0273933	DDB_G0273933	1	0	1	n
DDB_G0273963	DDB_G0273963	1	0	1	y
DDB_G0273979	psmD8-2	1	0	1	y
DDB_G0274017	iptC-2	1	0	1	n
DDB_G0274069	DDB_G0274069	1	0	1	y
DDB_G0274071	DDB_G0274071	1	0	1	y
DDB_G0274203	DDB_G0274203	1	0	1	n
DDB_G0274311	DDB_G0274311	1	0	1	y
DDB_G0274343	DDB_G0274343	1	0	1	n
DDB_G0274381	vatP	1	0	1	n
DDB_G0274413	DDB_G0274413_ps	1	0	1	y
DDB_G0274445	arrB	1	0	1	y
DDB_G0274453	DDB_G0274453_ps	1	0	1	y
DDB_G0274459	DDB_G0274459	1	0	1	y
DDB_G0274465	DDB_G0274465	1	0	1	y
DDB_G0274469	DDB_G0274469	1	0	1	y
DDB_G0274491	DDB_G0274491	1	0	1	n
DDB_G0274557	DDB_G0274557	1	0	1	n
DDB_G0274571	mmgt	1	0	1	n
DDB_G0274589	cofF	1	0	1	n
DDB_G0274611	DDB_G0274611_ps	1	0	1	y
DDB_G0274681	DDB_G0274681	1	0	1	n
DDB_G0274697	taf12	1	0	1	n
DDB_G0274711	DDB_G0274711	1	0	1	y
DDB_G0274717	DDB_G0274717_RTE	1	0	1	y
DDB_G0274723	DDB_G0274723	1	0	1	n
DDB_G0274725	DDB_G0274725	1	0	1	n
DDB_G0274769	DDB_G0274769_ps	1	0	1	y
DDB_G0275043	DDB_G0275043	1	0	1	n
DDB_G0275101	rab_ps2	1	0	1	n
DDB_G0275105	DDB_G0275105_ps	1	0	1	n
DDB_G0275131	DDB_G0275131	1	0	1	y
DDB_G0275147	DDB_G0275147	1	0	1	n
DDB_G0275151	DDB_G0275151	1	0	1	y
DDB_G0275161	DDB_G0275161	1	0	1	y
DDB_G0275201	DDB_G0275201	1	0	1	n
DDB_G0275217	DDB_G0275217_RTE	1	0	1	n
DDB_G0275247	DDB_G0275247	1	0	1	n
DDB_G0275291	DDB_G0275291	1	0	1	n
DDB_G0275347	DDB_G0275347	1	0	1	y
DDB_G0275471	csn8	1	0	1	n
DDB_G0275483	DDB_G0275483	1	0	1	y
DDB_G0275543	DDB_G0275543	1	0	1	y
DDB_G0275583	DDB_G0275583	1	0	1	n
DDB_G0275701	vatE	1	0	1	y
DDB_G0275705	DDB_G0275705	1	0	1	y
DDB_G0275709	DDB_G0275709_ps	1	0	1	n
DDB_G0275741	dio3	1	0	1	n
DDB_G0275755	DDB_G0275755	1	0	1	n
DDB_G0275803	DDB_G0275803_ps	1	0	1	n
DDB_G0275867	DDB_G0275867	1	0	1	n
DDB_G0275977	lvsB_ps	1	0	1	y
DDB_G0276231	DDB_G0276231	1	0	1	y
DDB_G0276235	DDB_G0276235	1	0	1	n
DDB_G0276257	DDB_G0276257	1	0	1	y
DDB_G0276319	fam18A	1	0	1	n
DDB_G0276327	DDB_G0276327	1	0	1	y
DDB_G0276329	DDB_G0276329_RTE	1	0	1	y
DDB_G0276479	ctnC	1	0	1	y
DDB_G0276501	DDB_G0276501_ps	1	0	1	n
DDB_G0276587	hspG4	1	0	1	y
DDB_G0276597	DDB_G0276597	1	0	1	y
DDB_G0276601	DDB_G0276601	1	0	1	y
DDB_G0276603	DDB_G0276603	1	0	1	n
DDB_G0276607	hspG3	1	0	1	y
DDB_G0276649	DDB_G0276649	1	0	1	n
DDB_G0276699	DDB_G0276699	1	0	1	y
DDB_G0276723	DDB_G0276723	1	0	1	y
DDB_G0276737	DDB_G0276737	1	0	1	y
DDB_G0276743	DDB_G0276743	1	0	1	y
DDB_G0276749	DDB_G0276749	1	0	1	y
DDB_G0276825	DDB_G0276825	1	0	1	n
DDB_G0276831	DDB_G0276831	1	0	1	y
DDB_G0276895	DDB_G0276895	1	0	1	n
DDB_G0276923	DDB_G0276923_ps	1	0	1	y
DDB_G0276925	DDB_G0276925	1	0	1	n
DDB_G0276927	DDB_G0276927	1	0	1	n
DDB_G0276953	hspG9	1	0	1	y
DDB_G0277001	cpiC	1	0	1	y
DDB_G0277015	msp	1	0	1	n
DDB_G0277073	DDB_G0277073_ps	1	0	1	y
DDB_G0277079	cyb5B	1	0	1	n
DDB_G0277123	hspG10	1	0	1	n
DDB_G0277125	hspG11	1	0	1	y
DDB_G0277159	DDB_G0277159	1	0	1	y
DDB_G0277259	DDB_G0277259	1	0	1	n
DDB_G0277267	ube2n	1	0	1	n
DDB_G0277369	DDB_G0277369	1	0	1	n
DDB_G0277491	hspG12	1	0	1	y
DDB_G0277505	hbx6	1	0	1	n
DDB_G0277575	DDB_G0277575	1	0	1	n
DDB_G0277595	DDB_G0277595	1	0	1	y
DDB_G0277605	DDB_G0277605	1	0	1	y
DDB_G0277735	DDB_G0277735	1	0	1	n
DDB_G0277907	rplP1	1	0	1	n
DDB_G0277931	DDB_G0277931	1	0	1	y
DDB_G0277971	vatG	1	0	1	n
DDB_G0278001	DDB_G0278001	1	0	1	n
DDB_G0278007	DDB_G0278007	1	0	1	y
DDB_G0278009	racN	1	0	1	y
DDB_G0278023	mrpl33	1	0	1	y
DDB_G0278027	snrpD1	1	0	1	y
DDB_G0278191	dak	1	0	1	n
DDB_G0278205	eIF1a	1	0	1	n
DDB_G0278221	DDB_G0278221_RTE	1	0	1	y
DDB_G0278225	hbx7	1	0	1	n
DDB_G0278265	DDB_G0278265	1	0	1	y
DDB_G0278277	mdm12	1	0	1	n
DDB_G0278323	DDB_G0278323	1	0	1	y
DDB_G0278383	DDB_G0278383	1	0	1	n
DDB_G0278387	bloc1s2	1	0	1	y
DDB_G0278441	DDB_G0278441	1	0	1	y
DDB_G0278543	srpRB	1	0	1	y
DDB_G0278561	DDB_G0278561	1	0	1	n
DDB_G0278631	DDB_G0278631	1	0	1	n
DDB_G0278711	nedd8	1	0	1	n
DDB_G0278713	prosc	1	0	1	n
DDB_G0278763	DDB_G0278763	1	0	1	n
DDB_G0278775	ube2c	1	0	1	n
DDB_G0278777	DDB_G0278777_ps	1	0	1	y
DDB_G0278821	snrpF	1	0	1	y
DDB_G0278831	DDB_G0278831	1	0	1	n
DDB_G0278837	DDB_G0278837	1	0	1	n
DDB_G0278871	DDB_G0278871	1	0	1	n
DDB_G0278883	DDB_G0278883	1	0	1	y
DDB_G0278889	mrpl27	1	0	1	y
DDB_G0278907	mobA	1	0	1	y
DDB_G0278911	DDB_G0278911	1	0	1	y
DDB_G0279057	DDB_G0279057	1	0	1	y
DDB_G0279073	DDB_G0279073	1	0	1	n
DDB_G0279097	DDB_G0279097_ps	1	0	1	y
DDB_G0279175	hspc300	1	0	1	n
DDB_G0279177	DDB_G0279177	1	0	1	y
DDB_G0279207	rps19	1	0	1	y
DDB_G0279223	DDB_G0279223	1	0	1	y
DDB_G0279299	DDB_G0279299	1	0	1	y
DDB_G0279319	DDB_G0279319	1	0	1	n
DDB_G0279351	DDB_G0279351	1	0	1	y
DDB_G0279385	DDB_G0279385	1	0	1	n
DDB_G0279457	DDB_G0279457_ps	1	0	1	y
DDB_G0279531	DDB_G0279531	1	0	1	n
DDB_G0279563	DDB_G0279563	1	0	1	n
DDB_G0279605	racB	1	0	1	y
DDB_G0279623	DDB_G0279623	1	0	1	y
DDB_G0279651	DDB_G0279651	1	0	1	n
DDB_G0279667	H2AX	1	0	1	n
DDB_G0279683	DDB_G0279683	1	0	1	y
DDB_G0279697	DDB_G0279697	1	0	1	n
DDB_G0279749	DDB_G0279749	1	0	1	y
DDB_G0279815	DDB_G0279815	1	0	1	y
DDB_G0279951	DDB_G0279951	1	0	1	y
DDB_G0279989	DDB_G0279989	1	0	1	n
DDB_G0280013	hspM	1	0	1	n
DDB_G0280023	DDB_G0280023	1	0	1	n
DDB_G0280109	med11	1	0	1	n
DDB_G0280153	DDB_G0280153	1	0	1	y
DDB_G0280229	rpl24	1	0	1	n
DDB_G0280241	DDB_G0280241	1	0	1	y
DDB_G0280265	DDB_G0280265	1	0	1	n
DDB_G0280269	DDB_G0280269	1	0	1	y
DDB_G0280279	DDB_G0280279	1	0	1	y
DDB_G0280305	DDB_G0280305	1	0	1	y
DDB_G0280325	DDB_G0280325	1	0	1	y
DDB_G0280347	DDB_G0280347	1	0	1	n
DDB_G0280349	DDB_G0280349	1	0	1	n
DDB_G0280387	DDB_G0280387	1	0	1	y
DDB_G0280389	DDB_G0280389	1	0	1	y
DDB_G0280391	DDB_G0280391	1	0	1	n
DDB_G0280399	tmem93	1	0	1	n
DDB_G0280579	DDB_G0280579	1	0	1	n
DDB_G0280609	ost4	1	0	1	n
DDB_G0280617	cyp519C2_ps	1	0	1	n
DDB_G0280651	tgrB_ps	1	0	1	n
DDB_G0280655	DDB_G0280655	1	0	1	y
DDB_G0280673	DDB_G0280673	1	0	1	y
DDB_G0280755	ubqB	1	0	1	y
DDB_G0280783	DDB_G0280783	1	0	1	y
DDB_G0280793	DDB_G0280793	1	0	1	n
DDB_G0280799	DDB_G0280799	1	0	1	n
DDB_G0281055	DDB_G0281055	1	0	1	n
DDB_G0281093	rpl37A	1	0	1	y
DDB_G0281177	tmem208	1	0	1	n
DDB_G0281243	DDB_G0281243	1	0	1	n
DDB_G0281395	DDB_G0281395	1	0	1	y
DDB_G0281597	DDB_G0281597	1	0	1	y
DDB_G0281655	DDB_G0281655	1	0	1	y
DDB_G0281713	DDB_G0281713	1	0	1	n
DDB_G0281723	DDB_G0281723	1	0	1	y
DDB_G0281759	DDB_G0281759	1	0	1	n
DDB_G0281771	DDB_G0281771	1	0	1	y
DDB_G0281805	DDB_G0281805	1	0	1	y
DDB_G0281807	DDB_G0281807_ps	1	0	1	y
DDB_G0281887	DDB_G0281887	1	0	1	y
DDB_G0281989	ponM	1	0	1	n
DDB_G0281995	DDB_G0281995	1	0	1	n
DDB_G0282015	DDB_G0282015	1	0	1	y
DDB_G0282037	DDB_G0282037	1	0	1	y
DDB_G0282039	DDB_G0282039	1	0	1	y
DDB_G0282165	DDB_G0282165	1	0	1	y
DDB_G0282195	timm16	1	0	1	n
DDB_G0282253	DDB_G0282253	1	0	1	n
DDB_G0282267	DDB_G0282267	1	0	1	n
DDB_G0282301	DDB_G0282301	1	0	1	y
DDB_G0282329	DDB_G0282329	1	0	1	n
DDB_G0282333	DDB_G0282333	1	0	1	n
DDB_G0282379	rpl28	1	0	1	y
DDB_G0282383	DDB_G0282383	1	0	1	y
DDB_G0282399	DDB_G0282399	1	0	1	n
DDB_G0282403	DDB_G0282403	1	0	1	n
DDB_G0282413	DDB_G0282413	1	0	1	n
DDB_G0282415	DDB_G0282415	1	0	1	y
DDB_G0282433	DDB_G0282433	1	0	1	n
DDB_G0282437	DDB_G0282437_ps	1	0	1	y
DDB_G0282447	DDB_G0282447	1	0	1	y
DDB_G0282483	DDB_G0282483	1	0	1	y
DDB_G0282533	DDB_G0282533	1	0	1	y
DDB_G0282657	DDB_G0282657	1	0	1	y
DDB_G0282699	DDB_G0282699	1	0	1	n
DDB_G0282751	DDB_G0282751_TE	1	0	1	y
DDB_G0282807	DDB_G0282807_ps	1	0	1	y
DDB_G0282829	gxcAA_ps	1	0	1	n
DDB_G0282897	tom7	1	0	1	n
DDB_G0282919	DDB_G0282919_TE	1	0	1	n
DDB_G0282929	atg12	1	0	1	y
DDB_G0282995	DDB_G0282995	1	0	1	n
DDB_G0283011	DDB_G0283011	1	0	1	n
DDB_G0283019	DDB_G0283019	1	0	1	n
DDB_G0283027	tgrT_ps2	1	0	1	y
DDB_G0283063	DDB_G0283063	1	0	1	n
DDB_G0283107	DDB_G0283107	1	0	1	n
DDB_G0283135	DDB_G0283135	1	0	1	y
DDB_G0283153	cbpD1	1	0	1	n
DDB_G0283171	DDB_G0283171	1	0	1	y
DDB_G0283235	DDB_G0283235_ps	1	0	1	y
DDB_G0283311	DDB_G0283311	1	0	1	n
DDB_G0283497	ssr1	1	0	1	n
DDB_G0283609	cbpG	1	0	1	n
DDB_G0283639	DDB_G0283639	1	0	1	n
DDB_G0283647	DDB_G0283647	1	0	1	n
DDB_G0283665	DDB_G0283665_ps	1	0	1	y
DDB_G0283729	DDB_G0283729	1	0	1	y
DDB_G0283849	DDB_G0283849	1	0	1	n
DDB_G0284009	ubcC	1	0	1	n
DDB_G0284109	DDB_G0284109	1	0	1	n
DDB_G0284111	DDB_G0284111	1	0	1	n
DDB_G0284125	DDB_G0284125	1	0	1	n
DDB_G0284151	DDB_G0284151	1	0	1	n
DDB_G0284185	syn6	1	0	1	n
DDB_G0284229	DDB_G0284229	1	0	1	n
DDB_G0284283	DDB_G0284283	1	0	1	y
DDB_G0284313	tbcC	1	0	1	y
DDB_G0284403	phf5a	1	0	1	y
DDB_G0284635	DDB_G0284635	1	0	1	n
DDB_G0284641	DDB_G0284641	1	0	1	n
DDB_G0284645	DDB_G0284645	1	0	1	n
DDB_G0284693	DDB_G0284693	1	0	1	n
DDB_G0284787	DDB_G0284787	1	0	1	n
DDB_G0284799	ndufa8	1	0	1	n
DDB_G0284801	DDB_G0284801	1	0	1	n
DDB_G0284815	DDB_G0284815	1	0	1	y
DDB_G0284919	DDB_G0284919	1	0	1	y
DDB_G0284929	DDB_G0284929	1	0	1	y
DDB_G0284949	DDB_G0284949	1	0	1	n
DDB_G0284951	vamp7A	1	0	1	y
DDB_G0284971	DDB_G0284971	1	0	1	y
DDB_G0285037	DDB_G0285037	1	0	1	y
DDB_G0285049	DDB_G0285049	1	0	1	n
DDB_G0285119	DDB_G0285119	1	0	1	n
DDB_G0285125	DDB_G0285125	1	0	1	y
DDB_G0285133	mocs2s	1	0	1	n
DDB_G0285151	DDB_G0285151	1	0	1	y
DDB_G0285187	DDB_G0285187	1	0	1	y
DDB_G0285285	DDB_G0285285	1	0	1	n
DDB_G0285343	gtf2a2	1	0	1	n
DDB_G0285379	DDB_G0285379	1	0	1	y
DDB_G0285459	DDB_G0285459	1	0	1	n
DDB_G0285471	DDB_G0285471	1	0	1	y
DDB_G0285563	DDB_G0285563	1	0	1	n
DDB_G0285597	rps28	1	0	1	y
DDB_G0285625	hdaC_ps2	1	0	1	y
DDB_G0285633	DDB_G0285633	1	0	1	y
DDB_G0285681	DDB_G0285681	1	0	1	n
DDB_G0285803	DDB_G0285803	1	0	1	y
DDB_G0285807	DDB_G0285807	1	0	1	y
DDB_G0285825	DDB_G0285825	1	0	1	y
DDB_G0285833	DDB_G0285833	1	0	1	n
DDB_G0286007	rbm8A	1	0	1	n
DDB_G0286071	DDB_G0286071	1	0	1	y
DDB_G0286187	proB	1	0	1	n
DDB_G0286189	sumo	1	0	1	n
DDB_G0286259	DDB_G0286259	1	0	1	n
DDB_G0286281	DDB_G0286281	1	0	1	n
DDB_G0286285	DDB_G0286285	1	0	1	n
DDB_G0286371	cbpM	1	0	1	y
DDB_G0286421	DDB_G0286421	1	0	1	n
DDB_G0286463	DDB_G0286463	1	0	1	n
DDB_G0286569	DDB_G0286569	1	0	1	n
DDB_G0286743	cyp555A1	1	0	1	n
DDB_G0286761	DDB_G0286761	1	0	1	y
DDB_G0286769	DDB_G0286769	1	0	1	y
DDB_G0286775	DDB_G0286775_ps	1	0	1	y
DDB_G0286779	DDB_G0286779	1	0	1	y
DDB_G0286781	DDB_G0286781	1	0	1	y
DDB_G0286815	DDB_G0286815_ps	1	0	1	n
DDB_G0286829	DDB_G0286829	1	0	1	y
DDB_G0286855	gtaD	1	0	1	n
DDB_G0286869	DDB_G0286869	1	0	1	n
DDB_G0286887	DDB_G0286887	1	0	1	n
DDB_G0286949	DDB_G0286949	1	0	1	n
DDB_G0286955	DDB_G0286955	1	0	1	y
DDB_G0287125	proA	1	0	1	y
DDB_G0287211	rab11B	1	0	1	y
DDB_G0287213	rcdJJ	1	0	1	y
DDB_G0287293	gerA	1	0	1	y
DDB_G0287395	DDB_G0287395	1	0	1	y
DDB_G0287403	DDB_G0287403	1	0	1	n
DDB_G0287413	DDB_G0287413	1	0	1	n
DDB_G0287453	DDB_G0287453_ps	1	0	1	y
DDB_G0287583	gerC	1	0	1	y
DDB_G0287613	DDB_G0287613	1	0	1	y
DDB_G0287835	DDB_G0287835	1	0	1	n
DDB_G0287865	DDB_G0287865	1	0	1	y
DDB_G0287975	DDB_G0287975	1	0	1	y
DDB_G0288053	empA	1	0	1	y
DDB_G0288141	DDB_G0288141	1	0	1	y
DDB_G0288153	DDB_G0288153	1	0	1	n
DDB_G0288159	DDB_G0288159	1	0	1	y
DDB_G0288287	atg101	1	0	1	y
DDB_G0288325	DDB_G0288325	1	0	1	y
DDB_G0288339	DDB_G0288339	1	0	1	n
DDB_G0288353	DDB_G0288353	1	0	1	n
DDB_G0288395	DDB_G0288395	1	0	1	n
DDB_G0288397	DDB_G0288397	1	0	1	n
DDB_G0288399	DDB_G0288399	1	0	1	n
DDB_G0288427	cenA	1	0	1	n
DDB_G0288567	DDB_G0288567	1	0	1	n
DDB_G0288653	DDB_G0288653	1	0	1	n
DDB_G0288663	DDB_G0288663	1	0	1	n
DDB_G0288665	DDB_G0288665	1	0	1	y
DDB_G0288727	DDB_G0288727	1	0	1	n
DDB_G0288757	DDB_G0288757	1	0	1	n
DDB_G0288767	DDB_G0288767	1	0	1	y
DDB_G0288829	DDB_G0288829	1	0	1	n
DDB_G0288901	DDB_G0288901	1	0	1	n
DDB_G0288913	DDB_G0288913	1	0	1	n
DDB_G0288925	DDB_G0288925	1	0	1	n
DDB_G0288935	panC	1	0	1	y
DDB_G0288973	DDB_G0288973	1	0	1	n
DDB_G0288991	DDB_G0288991	1	0	1	y
DDB_G0289009	DDB_G0289009	1	0	1	n
DDB_G0289025	rps7	1	0	1	n
DDB_G0289059	DDB_G0289059	1	0	1	n
DDB_G0289129	DDB_G0289129	1	0	1	n
DDB_G0289131	DDB_G0289131	1	0	1	y
DDB_G0289165	matA	1	0	1	y
DDB_G0289219	DDB_G0289219_ps	1	0	1	y
DDB_G0289293	DDB_G0289293	1	0	1	y
DDB_G0289315	DDB_G0289315	1	0	1	y
DDB_G0289345	DDB_G0289345	1	0	1	y
DDB_G0289377	DDB_G0289377	1	0	1	y
DDB_G0289411	DDB_G0289411	1	0	1	n
DDB_G0289427	DDB_G0289427	1	0	1	y
DDB_G0289459	DDB_G0289459	1	0	1	n
DDB_G0289579	DDB_G0289579	1	0	1	y
DDB_G0289609	DDB_G0289609	1	0	1	y
DDB_G0289699	nola2	1	0	1	n
DDB_G0289707	DDB_G0289707	1	0	1	n
DDB_G0289765	DDB_G0289765	1	0	1	n
DDB_G0289767	DDB_G0289767	1	0	1	y
DDB_G0289787	DDB_G0289787	1	0	1	y
DDB_G0289915	DDB_G0289915	1	0	1	n
DDB_G0289951	DDB_G0289951	1	0	1	n
DDB_G0289997	DDB_G0289997	1	0	1	y
DDB_G0290017	DDB_G0290017	1	0	1	n
DDB_G0290091	rpl22a	1	0	1	y
DDB_G0290137	DDB_G0290137	1	0	1	y
DDB_G0290155	DDB_G0290155	1	0	1	n
DDB_G0290269	cfr_ps2	1	0	1	y
DDB_G0290299	DDB_G0290299	1	0	1	y
DDB_G0290393	DDB_G0290393	1	0	1	n
DDB_G0290491	DDB_G0290491	1	0	1	n
DDB_G0290595	DDB_G0290595	1	0	1	y
DDB_G0290689	DDB_G0290689	1	0	1	n
DDB_G0290871	DDB_G0290871	1	0	1	n
DDB_G0290921	DDB_G0290921	1	0	1	n
DDB_G0291001	DDB_G0291001	1	0	1	n
DDB_G0291017	DDB_G0291017_ps	1	0	1	y
DDB_G0291049	ost2	1	0	1	y
DDB_G0291051	DDB_G0291051_ps	1	0	1	y
DDB_G0291073	DDB_G0291073	1	0	1	n
DDB_G0291089	DDB_G0291089	1	0	1	y
DDB_G0291129	ndufa6	1	0	1	y
DDB_G0291155	DDB_G0291155	1	0	1	n
DDB_G0291165	DDB_G0291165	1	0	1	n
DDB_G0291189	DDB_G0291189	1	0	1	y
DDB_G0291209	DDB_G0291209_ps	1	0	1	y
DDB_G0291316	DDB_G0291316	1	0	1	y
DDB_G0291326	DDB_G0291326	1	0	1	n
DDB_G0291416	DDB_G0291416	1	0	1	n
DDB_G0291418	DDB_G0291418	1	0	1	n
DDB_G0291422	DDB_G0291422	1	0	1	y
DDB_G0291488	DDB_G0291488	1	0	1	n
DDB_G0291494	DDB_G0291494	1	0	1	y
DDB_G0291564	DDB_G0291564	1	0	1	y
DDB_G0291640	DDB_G0291640	1	0	1	n
DDB_G0291750	mnd1	1	0	1	y
DDB_G0291800	DDB_G0291800	1	0	1	y
DDB_G0291888	DDB_G0291888	1	0	1	n
DDB_G0291904	DDB_G0291904	1	0	1	y
DDB_G0291924	DDB_G0291924	1	0	1	n
DDB_G0291952	DDB_G0291952	1	0	1	y
DDB_G0291976	racD	1	0	1	n
DDB_G0291988	if1	1	0	1	n
DDB_G0292078	DDB_G0292078	1	0	1	y
DDB_G0292088	DDB_G0292088	1	0	1	n
DDB_G0292106	DDB_G0292106	1	0	1	n
DDB_G0292228	DDB_G0292228	1	0	1	y
DDB_G0292232	DDB_G0292232	1	0	1	n
DDB_G0292254	DDB_G0292254	1	0	1	y
DDB_G0292322	DDB_G0292322	1	0	1	n
DDB_G0292364	DDB_G0292364_TE	1	0	1	n
DDB_G0292428	DDB_G0292428	1	0	1	n
DDB_G0292460	rpl6	1	0	1	n
DDB_G0292534	DDB_G0292534	1	0	1	y
DDB_G0292568	DDB_G0292568	1	0	1	y
DDB_G0292582	DDB_G0292582_ps	1	0	1	y
DDB_G0292588	rer1	1	0	1	y
DDB_G0292596	ube2v	1	0	1	y
DDB_G0292868	golt1	1	0	1	n
DDB_G0292890	DDB_G0292890	1	0	1	y
DDB_G0292908	ubqO	1	0	1	y
DDB_G0292910	ubq_ps	1	0	1	y
DDB_G0292938	DDB_G0292938_RTE	1	0	1	n
DDB_G0292984	ubqN	1	0	1	y
DDB_G0293156	DDB_G0293156_ps	1	0	1	n
DDB_G0293188	DDB_G0293188	1	0	1	y
DDB_G0293230	cdc26	1	0	1	n
DDB_G0293232	grl_ps	1	0	1	y
DDB_G0293260	DDB_G0293260	1	0	1	n
DDB_G0293310	DDB_G0293310	1	0	1	y
DDB_G0293316	DDB_G0293316	1	0	1	n
DDB_G0293320	DDB_G0293320	1	0	1	n
DDB_G0293328	DDB_G0293328	1	0	1	n
DDB_G0293336	DDB_G0293336	1	0	1	n
DDB_G0293344	DDB_G0293344_RTE	1	0	1	n
DDB_G0293452	DDB_G0293452_TE	1	0	1	y
DDB_G0293514	DDB_G0293514	1	0	1	n
DDB_G0293564	gins2	1	0	1	n
DDB_G0293652	DDB_G0293652	1	0	1	n
DDB_G0293660	DDB_G0293660	1	0	1	y
DDB_G0293672	DDB_G0293672	1	0	1	n
DDB_G0293688	DDB_G0293688	1	0	1	y
DDB_G0293766	mth	1	0	1	n
DDB_G0293774	DDB_G0293774	1	0	1	n
DDB_G0293814	DDB_G0293814	1	0	1	n
DDB_G0293870	DDB_G0293870	1	0	1	n
DDB_G0293880	DDB_G0293880	1	0	1	n
DDB_G0293906	DDB_G0293906	1	0	1	n
DDB_G0293910	DDB_G0293910	1	0	1	n
DDB_G0294044	mrps19	1	0	1	n
DDB_G0294072	mrps7	1	0	1	n
DDB_G0294074	mrps12	1	0	1	n
DDB_G0294246	DDB_G0294246_TE	1	0	1	n
DDB_G0294262	DDB_G0294262_TE	1	0	1	y
DDB_G0294300	DDB_G0294300_RTE	1	0	1	n
DDB_G0294382	DDB_G0294382	1	0	1	y
DDB_G0294409	sno1	1	0	1	n
DDB_G0294413	srpA	1	0	1	y
DDB_G0294605	DDB_G0294605	1	0	1	y
DDB_G0294649	tRNA-Met-CAU-2	1	0	1	n
DDB_G0294679	tRNA-Pro-UGG-2	1	0	1	y
DDB_G0294687	tRNA-Tyr-GUA-2	1	0	1	y
DDB_G0294705	tRNA-Met-CAU-3	1	0	1	y
DDB_G0294721	tRNA-Ser-AGA-1	1	0	1	y
DDB_G0294741	tRNA-Ile-AAU-1	1	0	1	y
DDB_G0294751	tRNA-Ile-AAU-2	1	0	1	n
DDB_G0294753	tRNA-Ile-AAU-3	1	0	1	n
DDB_G0294763	tRNA-Ala-UGC-1	1	0	1	y
DDB_G0294769	tRNA-Tyr-GUA-3	1	0	1	n
DDB_G0294771	tRNA-Val-CAC-1	1	0	1	y
DDB_G0294779	tRNA-Pro-UGG-4	1	0	1	y
DDB_G0294781	tRNA-Ile-AAU-5	1	0	1	y
DDB_G0294805	tRNA-Met-CAU-4	1	0	1	y
DDB_G0294817	tRNA-Pro-UGG-5	1	0	1	n
DDB_G0294819	tRNA-Pro-UGG-6	1	0	1	n
DDB_G0294831	tRNA-Ile-AAU-6	1	0	1	y
DDB_G0294841	tRNA-Leu-UAA-1	1	0	1	y
DDB_G0294845	tRNA-Met-CAU-6	1	0	1	n
DDB_G0294851	tRNA-Ser-AGA-2	1	0	1	y
DDB_G0294865	tRNA-Arg-UCU-3	1	0	1	y
DDB_G0294867	tRNA-Ser-AGA-3	1	0	1	y
DDB_G0294873	tRNA-Ser-AGA-4	1	0	1	n
DDB_G0294875	tRNA-Arg-UCU-4	1	0	1	y
DDB_G0294879	tRNA-Pro-UGG-7	1	0	1	y
DDB_G0294885	tRNA-Ala-UGC-2	1	0	1	y
DDB_G0294891	tRNA-Pro-UGG-8	1	0	1	y
DDB_G0294893	tRNA-Ile-AAU-7	1	0	1	y
DDB_G0294907	tRNA-Ser-AGA-5	1	0	1	y
DDB_G0294909	tRNA-Leu-UAA-3	1	0	1	y
DDB_G0294919	tRNA-Ala-UGC-3	1	0	1	y
DDB_G0294921	tRNA-Ser-AGA-6	1	0	1	y
DDB_G0294923	tRNA-Leu-CAG-1	1	0	1	n
DDB_G0294925	tRNA-Leu-UAA-4	1	0	1	n
DDB_G0294931	tRNA-Pro-UGG-9	1	0	1	n
DDB_G0294939	tRNA-Arg-UCU-5	1	0	1	y
DDB_G0294941	tRNA-Leu-UAA-5	1	0	1	y
DDB_G0294947	tRNA-Arg-UCU-6	1	0	1	y
DDB_G0294965	tRNA-Met-CAU-7	1	0	1	y
DDB_G0294969	tRNA-Met-CAU-8	1	0	1	y
DDB_G0294979	tRNA-Met-CAU-9	1	0	1	y
DDB_G0294993	tRNA-Leu-UAA-6	1	0	1	y
DDB_G0294997	tRNA-Met-CAU-11	1	0	1	n
DDB_G0295003	tRNA-Pro-UGG-10	1	0	1	y
DDB_G0295033	tRNA-Ser-AGA-7	1	0	1	y
DDB_G0295047	tRNA-Ala-UGC-4	1	0	1	y
DDB_G0295055	tRNA-Leu-UAA-7	1	0	1	y
DDB_G0295059	tRNA-Leu-UAA-8	1	0	1	y
DDB_G0295061	tRNA-Thr-CGU-1	1	0	1	y
DDB_G0295065	tRNA-Pro-UGG-11	1	0	1	n
DDB_G0295085	tRNA-Ile-AAU-8	1	0	1	n
DDB_G0295101	tRNA-Arg-UCU-7	1	0	1	n
DDB_G0295103	tRNA-Pro-UGG-12	1	0	1	y
DDB_G0295113	tRNA-Arg-UCU-8	1	0	1	n
DDB_G0295115	tRNA-Met-CAU-12	1	0	1	y
DDB_G0295117	tRNA-Leu-UAA-9	1	0	1	y
DDB_G0295119	tRNA-Arg-UCU-9	1	0	1	n
DDB_G0295123	tRNA-Leu-UAA-10	1	0	1	y
DDB_G0295129	tRNA-Ala-UGC-5	1	0	1	y
DDB_G0295137	tRNA-Ala-UGC-6	1	0	1	y
DDB_G0295143	tRNA-Arg-UCU-10	1	0	1	y
DDB_G0295147	tRNA-Ile-AAU-9	1	0	1	n
DDB_G0295153	tRNA-Ser-AGA-8	1	0	1	n
DDB_G0295169	tRNA-Ile-AAU-10	1	0	1	n
DDB_G0295179	tRNA-Tyr-GUA-5	1	0	1	y
DDB_G0295181	tRNA-Tyr-GUA-6	1	0	1	y
DDB_G0295191	tRNA-Tyr-GUA-7	1	0	1	n
DDB_G0295195	tRNA-Leu-UAA-11	1	0	1	y
DDB_G0295197	tRNA-Tyr-GUA-8	1	0	1	y
DDB_G0295203	tRNA-Leu-UAA-12	1	0	1	y
DDB_G0295207	tRNA-Ala-UGC-7	1	0	1	y
DDB_G0295247	tRNA-Pro-UGG-13	1	0	1	y
DDB_G0295257	tRNA-Arg-UCU-11	1	0	1	y
DDB_G0295261	tRNA-Met-CAU-14	1	0	1	y
DDB_G0295267	tRNA-Ala-UGC-8	1	0	1	n
DDB_G0295277	tRNA-Pro-UGG-14	1	0	1	y
DDB_G0295281	tRNA-Arg-UCU-12	1	0	1	y
DDB_G0295293	tRNA-Ile-AAU-11	1	0	1	y
DDB_G0295295	tRNA-Met-CAU-15	1	0	1	y
DDB_G0295313	tRNA-Leu-UAA-13	1	0	1	n
DDB_G0295327	tRNA-Tyr-GUA-9	1	0	1	y
DDB_G0295331	tRNA-Tyr-GUA-10	1	0	1	y
DDB_G0295337	tRNA-Ser-AGA-9	1	0	1	n
DDB_G0295347	tRNA-Ile-AAU-13	1	0	1	y
DDB_G0295351	tRNA-Met-CAU-16	1	0	1	y
DDB_G0295359	tRNA-Tyr-GUA-11	1	0	1	y
DDB_G0295363	tRNA-Ile-AAU-14	1	0	1	y
DDB_G0295381	tRNA-Ile-AAU-15	1	0	1	y
DDB_G0295387	tRNA-Leu-UAA-14	1	0	1	n
DDB_G0295389	tRNA-Leu-UAA-15	1	0	1	n
DDB_G0295407	tRNA-Ile-AAU-16	1	0	1	y
DDB_G0295417	tRNA-Leu-UAA-16	1	0	1	y
DDB_G0295423	tRNA-Tyr-GUA-13	1	0	1	y
DDB_G0295431	tRNA-Met-CAU-17	1	0	1	y
DDB_G0295435	tRNA-Leu-UAA-17	1	0	1	n
DDB_G0295453	tRNA-Pro-UGG-15	1	0	1	y
DDB_G0295455	tRNA-Pro-UGG-16	1	0	1	y
DDB_G0295463	tRNA-Leu-UAA-18	1	0	1	y
DDB_G0295465	tRNA-Ile-AAU-17	1	0	1	n
DDB_G0295493	srpB	1	0	1	y
DDB_G0295499	sno3	1	0	1	y
DDB_G0295509	r43	1	0	1	y
DDB_G0295529	rnu4c	1	0	1	n
DDB_G0295557	rnu4b	1	0	1	n
DDB_G0295559	rnu4a	1	0	1	y
DDB_G0295561	sno15	1	0	1	n
DDB_G0295581	r53	1	0	1	y
DDB_G0295615	sno7	1	0	1	n
DDB_G0295619	sno2	1	0	1	n
DDB_G0295655	5S_rRNA-2	1	0	1	y
DDB_G0295681	DDB_G0295681	1	0	1	y
DDB_G0295711	ap1s2	1	0	1	n
DDB_G0295763	DDB_G0295763	1	0	1	y
DDB_G0295769	DDB_G0295769	1	0	1	y
DDB_G0295789	DDB_G0295789	1	0	1	n
DDB_G0295815	DDB_G0295815_ps	1	0	1	y
DDB_G0295823	DDB_G0295823	1	0	1	n
DDB_G0302695	tRNA-Sec-UGA	1	0	1	n
DDB_G0304543	psmG4	1	0	1	n
DDB_G0305465	DDB_G0305465	1	0	1	y
DDB_G0348179	DDB_G0348179	1	0	1	n
DDB_G0348645	dsc_ps1	1	0	1	y
DDB_G0349111	hdaC_ps4	1	0	1	y
DDB_G0349155	patA_ps	1	0	1	n
DDB_G0349426	DDB_G0349426	1	0	1	n
DDB_G0267220	DDB_G0267220	0	1	1	y
DDB_G0267298	DDB_G0267298_TE	0	1	1	y
DDB_G0267612	DDB_G0267612	0	1	1	n
DDB_G0267646	sec20	0	1	1	y
DDB_G0267660	DDB_G0267660	0	1	1	n
DDB_G0267778	DDB_G0267778_RTE	0	1	1	y
DDB_G0267788	DDB_G0267788	0	1	1	n
DDB_G0267842	DDB_G0267842	0	1	1	n
DDB_G0267894	DDB_G0267894	0	1	1	n
DDB_G0267918	DDB_G0267918	0	1	1	n
DDB_G0267964	DDB_G0267964	0	1	1	n
DDB_G0268016	DDB_G0268016	0	1	1	n
DDB_G0268038	mtpn	0	1	1	n
DDB_G0268046	DDB_G0268046	0	1	1	n
DDB_G0268048	DDB_G0268048	0	1	1	n
DDB_G0268114	DDB_G0268114	0	1	1	n
DDB_G0268148	DDB_G0268148	0	1	1	y
DDB_G0268150	DDB_G0268150_ps	0	1	1	n
DDB_G0268154	DDB_G0268154	0	1	1	n
DDB_G0268300	DDB_G0268300	0	1	1	n
DDB_G0268324	DDB_G0268324	0	1	1	n
DDB_G0268326	DDB_G0268326	0	1	1	n
DDB_G0268454	DDB_G0268454	0	1	1	y
DDB_G0268478	DDB_G0268478	0	1	1	n
DDB_G0268522	psmG3	0	1	1	n
DDB_G0268542	DDB_G0268542	0	1	1	n
DDB_G0268562	alr_ps	0	1	1	y
DDB_G0268582	DDB_G0268582_RTE	0	1	1	y
DDB_G0268716	lsm5	0	1	1	n
DDB_G0268774	DDB_G0268774	0	1	1	n
DDB_G0268802	gpaJ	0	1	1	y
DDB_G0268882	DDB_G0268882	0	1	1	n
DDB_G0268884	DDB_G0268884	0	1	1	n
DDB_G0268900	DDB_G0268900	0	1	1	n
DDB_G0268938	ube2w	0	1	1	n
DDB_G0268960	DDB_G0268960	0	1	1	y
DDB_G0269012	DDB_G0269012	0	1	1	y
DDB_G0269178	racG	0	1	1	n
DDB_G0269318	DDB_G0269318	0	1	1	y
DDB_G0269324	gins4	0	1	1	n
DDB_G0269404	DDB_G0269404	0	1	1	y
DDB_G0269488	DDB_G0269488	0	1	1	n
DDB_G0269512	DDB_G0269512	0	1	1	n
DDB_G0269514	DDB_G0269514	0	1	1	n
DDB_G0269562	DDB_G0269562	0	1	1	n
DDB_G0269566	DDB_G0269566	0	1	1	y
DDB_G0269664	DDB_G0269664	0	1	1	n
DDB_G0269820	DDB_G0269820	0	1	1	y
DDB_G0269874	DDB_G0269874	0	1	1	n
DDB_G0269942	DDB_G0269942	0	1	1	n
DDB_G0269952	DDB_G0269952	0	1	1	n
DDB_G0270010	DDB_G0270010	0	1	1	y
DDB_G0270012	DDB_G0270012	0	1	1	n
DDB_G0270054	DDB_G0270054	0	1	1	y
DDB_G0270164	DDB_G0270164	0	1	1	n
DDB_G0270172	DDB_G0270172	0	1	1	n
DDB_G0270222	DDB_G0270222	0	1	1	y
DDB_G0270276	DDB_G0270276	0	1	1	y
DDB_G0270362	zfand	0	1	1	y
DDB_G0270364	DDB_G0270364	0	1	1	y
DDB_G0270374	DDB_G0270374_ps	0	1	1	y
DDB_G0270376	DDB_G0270376	0	1	1	y
DDB_G0270508	DDB_G0270508	0	1	1	y
DDB_G0270588	DDB_G0270588	0	1	1	n
DDB_G0270656	DDB_G0270656_ps	0	1	1	n
DDB_G0270658	acbA	0	1	1	y
DDB_G0270798	DDB_G0270798	0	1	1	y
DDB_G0270888	DDB_G0270888_RTE	0	1	1	n
DDB_G0270890	DDB_G0270890	0	1	1	n
DDB_G0270904	cyp508E1_ps	0	1	1	n
DDB_G0271046	DDB_G0271046_ps	0	1	1	n
DDB_G0271136	gafA	0	1	1	n
DDB_G0271152	DDB_G0271152	0	1	1	n
DDB_G0271168	DDB_G0271168_ps	0	1	1	y
DDB_G0271260	DDB_G0271260	0	1	1	y
DDB_G0271336	DDB_G0271336	0	1	1	y
DDB_G0271358	DDB_G0271358	0	1	1	y
DDB_G0271410	DDB_G0271410_ps	0	1	1	n
DDB_G0271474	DDB_G0271474_ps	0	1	1	y
DDB_G0271570	DDB_G0271570	0	1	1	y
DDB_G0271642	cks1	0	1	1	n
DDB_G0271710	DDB_G0271710_ps	0	1	1	n
DDB_G0271852	rtaA	0	1	1	y
DDB_G0271872	DDB_G0271872	0	1	1	n
DDB_G0271878	DDB_G0271878	0	1	1	n
DDB_G0271896	DDB_G0271896	0	1	1	y
DDB_G0271934	DDB_G0271934	0	1	1	y
DDB_G0271972	DDB_G0271972	0	1	1	y
DDB_G0272010	rrpB_ps	0	1	1	n
DDB_G0272036	rpb10	0	1	1	y
DDB_G0272152	DDB_G0272152	0	1	1	y
DDB_G0272230	DDB_G0272230	0	1	1	n
DDB_G0272238	DDB_G0272238	0	1	1	n
DDB_G0272270	DDB_G0272270_RTE	0	1	1	n
DDB_G0272308	rps29	0	1	1	y
DDB_G0272360	taf9	0	1	1	y
DDB_G0272476	DDB_G0272476	0	1	1	y
DDB_G0272508	DDB_G0272508	0	1	1	n
DDB_G0272534	DDB_G0272534	0	1	1	n
DDB_G0272562	csbB	0	1	1	n
DDB_G0272642	DDB_G0272642	0	1	1	n
DDB_G0272654	DDB_G0272654	0	1	1	y
DDB_G0272656	DDB_G0272656	0	1	1	n
DDB_G0272833	csbA	0	1	1	n
DDB_G0272931	timm9	0	1	1	y
DDB_G0272963	DDB_G0272963	0	1	1	y
DDB_G0273021	DDB_G0273021	0	1	1	y
DDB_G0273089	coq10-1	0	1	1	n
DDB_G0273153	DDB_G0273153	0	1	1	y
DDB_G0273307	DDB_G0273307_ps	0	1	1	n
DDB_G0273325	DDB_G0273325_RTE	0	1	1	y
DDB_G0273415	DDB_G0273415	0	1	1	n
DDB_G0273427	DDB_G0273427	0	1	1	n
DDB_G0273521	DDB_G0273521	0	1	1	n
DDB_G0273549	DDB_G0273549	0	1	1	n
DDB_G0273671	DDB_G0273671_ps	0	1	1	n
DDB_G0273803	coq10-2	0	1	1	n
DDB_G0273849	DDB_G0273849	0	1	1	y
DDB_G0273881	DDB_G0273881_RTE	0	1	1	y
DDB_G0273923	DDB_G0273923	0	1	1	y
DDB_G0274063	DDB_G0274063	0	1	1	n
DDB_G0274145	DDB_G0274145	0	1	1	y
DDB_G0274147	DDB_G0274147_ps	0	1	1	n
DDB_G0274157	DDB_G0274157	0	1	1	n
DDB_G0274163	DDB_G0274163	0	1	1	n
DDB_G0274173	DDB_G0274173	0	1	1	n
DDB_G0274245	DDB_G0274245	0	1	1	n
DDB_G0274281	ppiH	0	1	1	n
DDB_G0274331	DDB_G0274331	0	1	1	n
DDB_G0274359	cbpK	0	1	1	y
DDB_G0274417	DDB_G0274417	0	1	1	n
DDB_G0274439	DDB_G0274439	0	1	1	y
DDB_G0274477	DDB_G0274477	0	1	1	y
DDB_G0274479	DDB_G0274479	0	1	1	n
DDB_G0274549	DDB_G0274549	0	1	1	y
DDB_G0274551	rcdBB	0	1	1	y
DDB_G0274751	DDB_G0274751	0	1	1	y
DDB_G0274779	DDB_G0274779	0	1	1	n
DDB_G0274967	aplL	0	1	1	n
DDB_G0275027	DDB_G0275027	0	1	1	n
DDB_G0275115	sdhC	0	1	1	n
DDB_G0275163	DDB_G0275163	0	1	1	n
DDB_G0275211	srp19	0	1	1	n
DDB_G0275219	DDB_G0275219_RTE	0	1	1	n
DDB_G0275349	DDB_G0275349	0	1	1	y
DDB_G0275367	DDB_G0275367	0	1	1	n
DDB_G0275377	DDB_G0275377	0	1	1	n
DDB_G0275433	DDB_G0275433	0	1	1	n
DDB_G0275511	DDB_G0275511	0	1	1	y
DDB_G0275531	DDB_G0275531	0	1	1	y
DDB_G0275541	DDB_G0275541	0	1	1	n
DDB_G0275545	DDB_G0275545	0	1	1	n
DDB_G0275639	DDB_G0275639	0	1	1	n
DDB_G0275715	DDB_G0275715	0	1	1	n
DDB_G0275763	DDB_G0275763	0	1	1	n
DDB_G0275797	DDB_G0275797	0	1	1	n
DDB_G0275819	DDB_G0275819	0	1	1	y
DDB_G0275847	DDB_G0275847	0	1	1	y
DDB_G0275901	DDB_G0275901	0	1	1	n
DDB_G0275941	DDB_G0275941_RTE	0	1	1	n
DDB_G0276001	DDB_G0276001	0	1	1	y
DDB_G0276127	DDB_G0276127	0	1	1	n
DDB_G0276165	DDB_G0276165	0	1	1	n
DDB_G0276419	DDB_G0276419	0	1	1	y
DDB_G0276421	DDB_G0276421	0	1	1	n
DDB_G0276457	rps15a	0	1	1	y
DDB_G0276585	DDB_G0276585	0	1	1	n
DDB_G0276589	DDB_G0276589	0	1	1	n
DDB_G0276591	DDB_G0276591	0	1	1	y
DDB_G0276595	DDB_G0276595	0	1	1	n
DDB_G0276599	DDB_G0276599	0	1	1	y
DDB_G0276605	DDB_G0276605	0	1	1	y
DDB_G0276609	DDB_G0276609	0	1	1	n
DDB_G0276611	DDB_G0276611	0	1	1	n
DDB_G0276641	DDB_G0276641	0	1	1	n
DDB_G0276643	DDB_G0276643	0	1	1	y
DDB_G0276665	DDB_G0276665_ps	0	1	1	y
DDB_G0276701	DDB_G0276701	0	1	1	y
DDB_G0276703	DDB_G0276703	0	1	1	n
DDB_G0276741	DDB_G0276741	0	1	1	y
DDB_G0276751	DDB_G0276751	0	1	1	y
DDB_G0276781	DDB_G0276781	0	1	1	y
DDB_G0276863	H4b	0	1	1	n
DDB_G0276955	DDB_G0276955	0	1	1	n
DDB_G0276957	DDB_G0276957	0	1	1	y
DDB_G0276995	nat_ps	0	1	1	n
DDB_G0277035	DDB_G0277035	0	1	1	n
DDB_G0277061	dph3	0	1	1	y
DDB_G0277121	DDB_G0277121_ps	0	1	1	y
DDB_G0277183	H4a	0	1	1	y
DDB_G0277189	DDB_G0277189	0	1	1	y
DDB_G0277373	DDB_G0277373	0	1	1	n
DDB_G0277499	DDB_G0277499	0	1	1	y
DDB_G0277523	DDB_G0277523_RTE	0	1	1	y
DDB_G0277561	dynC	0	1	1	n
DDB_G0277563	DDB_G0277563	0	1	1	y
DDB_G0277583	DDB_G0277583	0	1	1	y
DDB_G0277631	DDB_G0277631	0	1	1	y
DDB_G0277703	aplF	0	1	1	y
DDB_G0277759	phyA	0	1	1	y
DDB_G0277965	DDB_G0277965	0	1	1	n
DDB_G0277981	DDB_G0277981_ps	0	1	1	n
DDB_G0278017	DDB_G0278017	0	1	1	n
DDB_G0278049	DDB_G0278049	0	1	1	n
DDB_G0278167	DDB_G0278167	0	1	1	y
DDB_G0278199	DDB_G0278199	0	1	1	n
DDB_G0278231	DDB_G0278231	0	1	1	n
DDB_G0278335	snrpC	0	1	1	n
DDB_G0278371	spc1	0	1	1	n
DDB_G0278523	DDB_G0278523	0	1	1	n
DDB_G0278643	trappc5	0	1	1	n
DDB_G0278695	DDB_G0278695	0	1	1	n
DDB_G0278697	DDB_G0278697	0	1	1	n
DDB_G0278811	DDB_G0278811	0	1	1	y
DDB_G0279297	DDB_G0279297	0	1	1	n
DDB_G0279399	DDB_G0279399_ps	0	1	1	n
DDB_G0279415	limE	0	1	1	n
DDB_G0279469	DDB_G0279469_RTE	0	1	1	y
DDB_G0279543	DDB_G0279543	0	1	1	n
DDB_G0279567	DDB_G0279567	0	1	1	y
DDB_G0279663	DDB_G0279663	0	1	1	n
DDB_G0279787	DDB_G0279787	0	1	1	y
DDB_G0279829	DDB_G0279829	0	1	1	n
DDB_G0279847	expl4_ps	0	1	1	n
DDB_G0279907	DDB_G0279907	0	1	1	y
DDB_G0279949	DDB_G0279949	0	1	1	n
DDB_G0279987	DDB_G0279987	0	1	1	n
DDB_G0279993	DDB_G0279993	0	1	1	n
DDB_G0280061	sybA	0	1	1	n
DDB_G0280123	DDB_G0280123	0	1	1	n
DDB_G0280139	DDB_G0280139	0	1	1	n
DDB_G0280173	isca1	0	1	1	n
DDB_G0280201	DDB_G0280201	0	1	1	n
DDB_G0280263	DDB_G0280263	0	1	1	n
DDB_G0280335	DDB_G0280335	0	1	1	n
DDB_G0280367	DDB_G0280367	0	1	1	n
DDB_G0280403	DDB_G0280403	0	1	1	y
DDB_G0280415	DDB_G0280415	0	1	1	n
DDB_G0280441	DDB_G0280441	0	1	1	n
DDB_G0280451	DDB_G0280451	0	1	1	n
DDB_G0280497	DDB_G0280497	0	1	1	n
DDB_G0280501	DDB_G0280501	0	1	1	y
DDB_G0280605	DDB_G0280605	0	1	1	n
DDB_G0280679	act37_ps	0	1	1	y
DDB_G0280691	DDB_G0280691	0	1	1	n
DDB_G0280723	DDB_G0280723_ps	0	1	1	y
DDB_G0280727	DDB_G0280727	0	1	1	n
DDB_G0280733	DDB_G0280733	0	1	1	n
DDB_G0280771	DDB_G0280771	0	1	1	y
DDB_G0280915	DDB_G0280915	0	1	1	y
DDB_G0280919	DDB_G0280919	0	1	1	n
DDB_G0281037	DDB_G0281037	0	1	1	n
DDB_G0281049	DDB_G0281049	0	1	1	n
DDB_G0281053	DDB_G0281053	0	1	1	y
DDB_G0281161	DDB_G0281161	0	1	1	n
DDB_G0281189	DDB_G0281189	0	1	1	y
DDB_G0281191	DDB_G0281191	0	1	1	n
DDB_G0281195	DDB_G0281195	0	1	1	n
DDB_G0281197	DDB_G0281197	0	1	1	y
DDB_G0281227	DDB_G0281227	0	1	1	y
DDB_G0281233	DDB_G0281233	0	1	1	n
DDB_G0281275	DDB_G0281275	0	1	1	y
DDB_G0281311	DDB_G0281311	0	1	1	n
DDB_G0281453	DDB_G0281453_RTE	0	1	1	n
DDB_G0281469	rpl29	0	1	1	n
DDB_G0281509	DDB_G0281509	0	1	1	y
DDB_G0281583	DDB_G0281583	0	1	1	y
DDB_G0281591	colA_ps4	0	1	1	y
DDB_G0281769	DDB_G0281769	0	1	1	n
DDB_G0281795	nacB	0	1	1	y
DDB_G0281983	tmem50	0	1	1	n
DDB_G0282109	DDB_G0282109	0	1	1	n
DDB_G0282259	DDB_G0282259	0	1	1	y
DDB_G0282281	DDB_G0282281	0	1	1	y
DDB_G0282371	veg111	0	1	1	y
DDB_G0282435	DDB_G0282435	0	1	1	y
DDB_G0282439	DDB_G0282439	0	1	1	y
DDB_G0282441	DDB_G0282441	0	1	1	n
DDB_G0282465	DDB_G0282465	0	1	1	n
DDB_G0282561	DDB_G0282561_RTE	0	1	1	n
DDB_G0282603	DDB_G0282603	0	1	1	y
DDB_G0282607	crsA	0	1	1	n
DDB_G0282665	DDB_G0282665_ps	0	1	1	n
DDB_G0282821	DDB_G0282821	0	1	1	n
DDB_G0282831	pcbd	0	1	1	n
DDB_G0282843	DDB_G0282843	0	1	1	n
DDB_G0282917	DDB_G0282917	0	1	1	y
DDB_G0282921	ctu1	0	1	1	n
DDB_G0282937	DDB_G0282937	0	1	1	y
DDB_G0282939	DDB_G0282939	0	1	1	n
DDB_G0282951	DDB_G0282951	0	1	1	n
DDB_G0283069	DDB_G0283069	0	1	1	y
DDB_G0283093	DDB_G0283093	0	1	1	n
DDB_G0283155	DDB_G0283155	0	1	1	n
DDB_G0283209	DDB_G0283209	0	1	1	y
DDB_G0283395	DDB_G0283395	0	1	1	n
DDB_G0283559	DDB_G0283559	0	1	1	n
DDB_G0283567	DDB_G0283567	0	1	1	n
DDB_G0283571	DDB_G0283571	0	1	1	n
DDB_G0283649	DDB_G0283649	0	1	1	n
DDB_G0283705	DDB_G0283705	0	1	1	y
DDB_G0283783	DDB_G0283783	0	1	1	y
DDB_G0283809	dcp2_ps	0	1	1	y
DDB_G0283811	mcfR	0	1	1	n
DDB_G0283843	DDB_G0283843	0	1	1	y
DDB_G0284057	DDB_G0284057	0	1	1	n
DDB_G0284167	DDB_G0284167	0	1	1	y
DDB_G0284173	DDB_G0284173	0	1	1	n
DDB_G0284199	DDB_G0284199	0	1	1	y
DDB_G0284221	atox1	0	1	1	y
DDB_G0284275	DDB_G0284275	0	1	1	n
DDB_G0284287	DDB_G0284287	0	1	1	n
DDB_G0284311	DDB_G0284311	0	1	1	y
DDB_G0284451	DDB_G0284451_ps	0	1	1	y
DDB_G0284533	rps13	0	1	1	y
DDB_G0284629	DDB_G0284629	0	1	1	y
DDB_G0284631	DDB_G0284631	0	1	1	n
DDB_G0284793	DDB_G0284793	0	1	1	n
DDB_G0284911	timm10	0	1	1	y
DDB_G0284925	DDB_G0284925	0	1	1	y
DDB_G0284927	DDB_G0284927	0	1	1	n
DDB_G0284931	DDB_G0284931	0	1	1	n
DDB_G0284941	DDB_G0284941	0	1	1	n
DDB_G0284959	DDB_G0284959	0	1	1	n
DDB_G0285003	aifC	0	1	1	n
DDB_G0285043	DDB_G0285043	0	1	1	y
DDB_G0285099	psmE3	0	1	1	n
DDB_G0285115	DDB_G0285115	0	1	1	y
DDB_G0285181	DDB_G0285181	0	1	1	n
DDB_G0285189	DDB_G0285189	0	1	1	n
DDB_G0285229	DDB_G0285229	0	1	1	y
DDB_G0285293	spt4	0	1	1	n
DDB_G0285301	DDB_G0285301	0	1	1	y
DDB_G0285359	DDB_G0285359	0	1	1	n
DDB_G0285389	DDB_G0285389	0	1	1	y
DDB_G0285457	impA_ps	0	1	1	y
DDB_G0285469	DDB_G0285469	0	1	1	n
DDB_G0285489	DDB_G0285489	0	1	1	y
DDB_G0285639	DDB_G0285639	0	1	1	y
DDB_G0285691	DDB_G0285691	0	1	1	y
DDB_G0285753	DDB_G0285753_ps	0	1	1	y
DDB_G0285873	DDB_G0285873	0	1	1	y
DDB_G0285929	DDB_G0285929	0	1	1	n
DDB_G0285983	DDB_G0285983	0	1	1	n
DDB_G0286001	DDB_G0286001	0	1	1	y
DDB_G0286029	DDB_G0286029_ps	0	1	1	n
DDB_G0286077	commd6	0	1	1	n
DDB_G0286213	DDB_G0286213_ps	0	1	1	y
DDB_G0286307	DDB_G0286307	0	1	1	n
DDB_G0286469	DDB_G0286469	0	1	1	n
DDB_G0286475	DDB_G0286475	0	1	1	n
DDB_G0286493	DDB_G0286493	0	1	1	n
DDB_G0286541	timm23	0	1	1	n
DDB_G0286587	DDB_G0286587	0	1	1	y
DDB_G0286667	DDB_G0286667	0	1	1	n
DDB_G0286683	DDB_G0286683	0	1	1	y
DDB_G0286715	ponC2	0	1	1	n
DDB_G0286717	ponC1	0	1	1	y
DDB_G0286719	ponC4	0	1	1	n
DDB_G0286747	H2AZ	0	1	1	y
DDB_G0286799	DDB_G0286799	0	1	1	y
DDB_G0286837	gtaM	0	1	1	y
DDB_G0286871	DDB_G0286871	0	1	1	n
DDB_G0286909	anapc11	0	1	1	y
DDB_G0286915	DDB_G0286915	0	1	1	n
DDB_G0286937	DDB_G0286937	0	1	1	n
DDB_G0287021	vps20	0	1	1	y
DDB_G0287053	lsm4	0	1	1	y
DDB_G0287067	DDB_G0287067	0	1	1	n
DDB_G0287155	DDB_G0287155	0	1	1	y
DDB_G0287227	trxE	0	1	1	n
DDB_G0287341	DDB_G0287341	0	1	1	n
DDB_G0287429	DDB_G0287429	0	1	1	y
DDB_G0287605	tgrP1	0	1	1	n
DDB_G0287633	DDB_G0287633	0	1	1	y
DDB_G0287795	gcvH4	0	1	1	n
DDB_G0287849	trxD	0	1	1	y
DDB_G0287995	rplp1B	0	1	1	y
DDB_G0288113	DDB_G0288113_ps	0	1	1	n
DDB_G0288125	DDB_G0288125	0	1	1	n
DDB_G0288329	DDB_G0288329	0	1	1	n
DDB_G0288393	DDB_G0288393	0	1	1	y
DDB_G0288417	DDB_G0288417	0	1	1	n
DDB_G0288467	DDB_G0288467	0	1	1	y
DDB_G0288667	DDB_G0288667	0	1	1	n
DDB_G0288759	tmem14A	0	1	1	n
DDB_G0288775	mppB_ps	0	1	1	y
DDB_G0288831	cox17	0	1	1	n
DDB_G0288865	DDB_G0288865	0	1	1	n
DDB_G0288933	cda	0	1	1	y
DDB_G0289035	hlcs3	0	1	1	y
DDB_G0289065	DDB_G0289065	0	1	1	n
DDB_G0289161	DDB_G0289161	0	1	1	y
DDB_G0289391	pkiA	0	1	1	y
DDB_G0289441	DDB_G0289441_RTE	0	1	1	y
DDB_G0289549	DDB_G0289549	0	1	1	n
DDB_G0289651	gtaO	0	1	1	n
DDB_G0289729	DDB_G0289729	0	1	1	n
DDB_G0289739	DDB_G0289739	0	1	1	n
DDB_G0289769	DDB_G0289769	0	1	1	n
DDB_G0289809	DDB_G0289809_ps	0	1	1	n
DDB_G0289913	DDB_G0289913	0	1	1	n
DDB_G0289957	DDB_G0289957	0	1	1	n
DDB_G0290003	DDB_G0290003	0	1	1	n
DDB_G0290015	grxA	0	1	1	y
DDB_G0290027	DDB_G0290027	0	1	1	n
DDB_G0290053	tmem170	0	1	1	n
DDB_G0290185	crlF	0	1	1	n
DDB_G0290291	DDB_G0290291	0	1	1	n
DDB_G0290341	DDB_G0290341	0	1	1	y
DDB_G0290363	sybB	0	1	1	n
DDB_G0290403	DDB_G0290403	0	1	1	y
DDB_G0290461	DDB_G0290461	0	1	1	n
DDB_G0290583	DDB_G0290583	0	1	1	n
DDB_G0290585	DDB_G0290585	0	1	1	n
DDB_G0290599	DDB_G0290599	0	1	1	n
DDB_G0290739	DDB_G0290739_ps	0	1	1	n
DDB_G0290767	DDB_G0290767	0	1	1	y
DDB_G0290773	DDB_G0290773	0	1	1	n
DDB_G0290831	rabK3	0	1	1	y
DDB_G0290855	DDB_G0290855	0	1	1	y
DDB_G0290885	DDB_G0290885	0	1	1	y
DDB_G0290905	DDB_G0290905	0	1	1	n
DDB_G0290945	DDB_G0290945	0	1	1	y
DDB_G0291143	DDB_G0291143	0	1	1	n
DDB_G0291255	29C	0	1	1	n
DDB_G0291291	ecmF	0	1	1	y
DDB_G0291318	DDB_G0291318	0	1	1	y
DDB_G0291388	DDB_G0291388	0	1	1	y
DDB_G0291462	DDB_G0291462	0	1	1	y
DDB_G0291518	DDB_G0291518	0	1	1	y
DDB_G0291538	DDB_G0291538	0	1	1	y
DDB_G0291562	osbL	0	1	1	y
DDB_G0291626	DDB_G0291626	0	1	1	n
DDB_G0291628	DDB_G0291628	0	1	1	n
DDB_G0291834	cpiA	0	1	1	n
DDB_G0291970	cofB	0	1	1	n
DDB_G0292202	DDB_G0292202	0	1	1	n
DDB_G0292218	st15	0	1	1	n
DDB_G0292236	DDB_G0292236	0	1	1	n
DDB_G0292318	rsmD	0	1	1	y
DDB_G0292438	DDB_G0292438	0	1	1	y
DDB_G0292500	DDB_G0292500	0	1	1	n
DDB_G0292502	DDB_G0292502	0	1	1	n
DDB_G0292510	drap1	0	1	1	n
DDB_G0292518	DDB_G0292518	0	1	1	n
DDB_G0292526	DDB_G0292526	0	1	1	n
DDB_G0292542	DDB_G0292542	0	1	1	n
DDB_G0292614	DDB_G0292614	0	1	1	y
DDB_G0292628	DDB_G0292628	0	1	1	n
DDB_G0292650	DDB_G0292650	0	1	1	n
DDB_G0292762	hacl1_ps	0	1	1	n
DDB_G0292922	DDB_G0292922	0	1	1	y
DDB_G0293068	DDB_G0293068	0	1	1	y
DDB_G0293314	DDB_G0293314	0	1	1	n
DDB_G0293318	DDB_G0293318	0	1	1	n
DDB_G0293322	DDB_G0293322	0	1	1	n
DDB_G0293324	DDB_G0293324	0	1	1	y
DDB_G0293326	DDB_G0293326	0	1	1	y
DDB_G0293348	DDB_G0293348_RTE	0	1	1	y
DDB_G0293352	DDB_G0293352_ps	0	1	1	y
DDB_G0293370	DDB_G0293370	0	1	1	n
DDB_G0293422	DDB_G0293422	0	1	1	n
DDB_G0293424	DDB_G0293424	0	1	1	n
DDB_G0293464	DDB_G0293464	0	1	1	n
DDB_G0293466	abcG_ps2	0	1	1	n
DDB_G0293484	psenen	0	1	1	y
DDB_G0293486	DDB_G0293486_RTE	0	1	1	y
DDB_G0293574	DDB_G0293574	0	1	1	n
DDB_G0293648	DDB_G0293648	0	1	1	y
DDB_G0293650	fahd2	0	1	1	y
DDB_G0293754	DDB_G0293754	0	1	1	n
DDB_G0293760	DDB_G0293760	0	1	1	n
DDB_G0293790	DDB_G0293790_ps	0	1	1	y
DDB_G0293808	DDB_G0293808	0	1	1	n
DDB_G0293810	DDB_G0293810	0	1	1	n
DDB_G0293854	DDB_G0293854	0	1	1	n
DDB_G0294016	atp9	0	1	1	y
DDB_G0294020	nad2	0	1	1	n
DDB_G0294032	nad9	0	1	1	n
DDB_G0294056	DidioMp35	0	1	1	n
DDB_G0294146	DDB_G0294146_RTE	0	1	1	y
DDB_G0294164	DDB_G0294164_RTE	0	1	1	n
DDB_G0294168	DDB_G0294168_RTE	0	1	1	y
DDB_G0294198	DDB_G0294198	0	1	1	n
DDB_G0294308	DDB_G0294308_TE	0	1	1	y
DDB_G0294360	DDB_G0294360_RTE	0	1	1	y
DDB_G0294380	DDB_G0294380	0	1	1	y
DDB_G0294515	dutA	0	1	1	y
DDB_G0294625	DDB_G0294625_ps	0	1	1	y
DDB_G0294641	tRNA-Met-CAU-1	0	1	1	y
DDB_G0294643	tRNA-Lys-UUU-1	0	1	1	n
DDB_G0295501	rnu2g	0	1	1	n
DDB_G0295505	rnu6	0	1	1	y
DDB_G0295511	sno10	0	1	1	n
DDB_G0295589	r54	0	1	1	n
DDB_G0295605	sno12	0	1	1	n
DDB_G0295623	rnu2d	0	1	1	n
DDB_G0295645	5.8S_rRNA-1	0	1	1	n
DDB_G0295651	5.8S_rRNA-2	0	1	1	y
DDB_G0295733	DDB_G0295733	0	1	1	n
DDB_G0295759	DDB_G0295759	0	1	1	y
DDB_G0295775	DDB_G0295775	0	1	1	n
DDB_G0295811	DDB_G0295811	0	1	1	n
DDB_G0302414	snrpE	0	1	1	y
DDB_G0304886	DDB_G0304886	0	1	1	y
DDB_G0307754	DDB_G0307754_RTE	0	1	1	y
DDB_G0347202	DDB_G0347202	0	1	1	n
DDB_G0348427	DDB_G0348427_ps	0	1	1	y
DDB_G0348639	DDB_G0348639	0	1	1	y
DDB_G0349279	DDB_G0349279	0	1	1	y
DDB_G0349390	DDB_G0349390	0	1	1	y
DDB_G0349476	DDB_G0349476_ps	0	1	1	y
DDB_G0267216	DDB_G0267216	2	0	2	y
DDB_G0267230	DDB_G0267230	2	0	2	n
DDB_G0267252	DDB_G0267252	2	0	2	n
DDB_G0267262	DDB_G0267262_RTE	1	1	2	y
DDB_G0267296	DDB_G0267296_RTE	1	1	2	n
DDB_G0267390	psmB6	1	1	2	y
DDB_G0267398	gppA	1	1	2	n
DDB_G0267412	pspA	1	1	2	n
DDB_G0267446	cnbA	1	1	2	y
DDB_G0267454	ancA	1	1	2	n
DDB_G0267456	cbp2	2	0	2	y
DDB_G0267476	sigK	1	1	2	y
DDB_G0267550	DDB_G0267550	2	0	2	n
DDB_G0267600	DDB_G0267600	1	1	2	y
DDB_G0267610	DDB_G0267610	2	0	2	y
DDB_G0267618	DDB_G0267618_ps	1	1	2	y
DDB_G0267790	DDB_G0267790	1	1	2	n
DDB_G0267876	DDB_G0267876	1	1	2	n
DDB_G0267890	DDB_G0267890	2	0	2	y
DDB_G0267892	DDB_G0267892	2	0	2	n
DDB_G0267930	DDB_G0267930	1	1	2	n
DDB_G0267956	abiA	1	1	2	n
DDB_G0267968	DDB_G0267968	2	0	2	y
DDB_G0267988	DDB_G0267988	1	1	2	y
DDB_G0267990	ypel	1	1	2	y
DDB_G0268050	DDB_G0268050	2	0	2	n
DDB_G0268054	DDB_G0268054	1	1	2	y
DDB_G0268086	DDB_G0268086	2	0	2	n
DDB_G0268092	DDB_G0268092	1	1	2	n
DDB_G0268120	DDB_G0268120_ps	2	0	2	n
DDB_G0268136	DDB_G0268136	1	1	2	n
DDB_G0268146	DDB_G0268146	1	1	2	y
DDB_G0268166	DDB_G0268166	1	1	2	n
DDB_G0268182	DDB_G0268182	1	1	2	n
DDB_G0268220	DDB_G0268220	1	1	2	n
DDB_G0268240	DDB_G0268240	1	1	2	n
DDB_G0268294	DDB_G0268294_ps	1	1	2	y
DDB_G0268376	DDB_G0268376	2	0	2	y
DDB_G0268402	rab24	1	1	2	n
DDB_G0268406	DDB_G0268406	1	1	2	y
DDB_G0268442	DDB_G0268442	1	1	2	y
DDB_G0268450	DDB_G0268450	2	0	2	n
DDB_G0268460	ponK	1	1	2	y
DDB_G0268518	DDB_G0268518	1	1	2	n
DDB_G0268550	DDB_G0268550	2	0	2	y
DDB_G0268596	DDB_G0268596_RTE	2	0	2	n
DDB_G0268602	DDB_G0268602	1	1	2	n
DDB_G0268630	spsA	1	1	2	y
DDB_G0268666	DDB_G0268666	2	0	2	n
DDB_G0268694	DDB_G0268694	2	0	2	y
DDB_G0268712	DDB_G0268712	2	0	2	n
DDB_G0268734	DDB_G0268734	1	1	2	y
DDB_G0268752	DDB_G0268752	1	1	2	y
DDB_G0268760	rabQ	1	1	2	n
DDB_G0268762	DDB_G0268762	2	0	2	y
DDB_G0268772	DDB_G0268772	2	0	2	y
DDB_G0268782	DDB_G0268782	2	0	2	n
DDB_G0268798	DDB_G0268798	2	0	2	n
DDB_G0268836	DDB_G0268836	1	1	2	y
DDB_G0268926	DDB_G0268926_ps	1	1	2	y
DDB_G0268930	DDB_G0268930_ps	1	1	2	n
DDB_G0268932	DDB_G0268932	1	1	2	n
DDB_G0268968	DDB_G0268968	1	1	2	n
DDB_G0268996	DDB_G0268996	1	1	2	y
DDB_G0269066	DDB_G0269066	1	1	2	y
DDB_G0269072	DDB_G0269072	1	1	2	y
DDB_G0269074	DDB_G0269074	2	0	2	n
DDB_G0269092	DDB_G0269092	1	1	2	y
DDB_G0269096	DDB_G0269096	1	1	2	y
DDB_G0269102	arcD	2	0	2	n
DDB_G0269120	cypB	1	1	2	n
DDB_G0269230	fpaA	2	0	2	y
DDB_G0269238	rab11A	2	0	2	n
DDB_G0269240	racH	1	1	2	y
DDB_G0269342	DDB_G0269342	1	1	2	n
DDB_G0269356	DDB_G0269356	2	0	2	y
DDB_G0269406	rad52	1	1	2	n
DDB_G0269434	DDB_G0269434	2	0	2	n
DDB_G0269436	DDB_G0269436	2	0	2	y
DDB_G0269468	DDB_G0269468	2	0	2	n
DDB_G0269532	DDB_G0269532	1	1	2	n
DDB_G0269568	med7	2	0	2	n
DDB_G0269578	DDB_G0269578	1	1	2	y
DDB_G0269586	DDB_G0269586	2	0	2	n
DDB_G0269604	DDB_G0269604_ps	1	1	2	n
DDB_G0269634	DDB_G0269634	1	1	2	y
DDB_G0269646	DDB_G0269646	1	1	2	n
DDB_G0269654	DDB_G0269654_ps	1	1	2	y
DDB_G0269656	DDB_G0269656	1	1	2	n
DDB_G0269666	DDB_G0269666	1	1	2	y
DDB_G0269674	DDB_G0269674	1	1	2	n
DDB_G0269692	DDB_G0269692	2	0	2	y
DDB_G0269722	DDB_G0269722	2	0	2	y
DDB_G0269730	DDB_G0269730	1	1	2	n
DDB_G0269766	DDB_G0269766	1	1	2	y
DDB_G0269774	DDB_G0269774	2	0	2	n
DDB_G0269828	DDB_G0269828	1	1	2	n
DDB_G0269858	DDB_G0269858	1	1	2	y
DDB_G0269876	samkA	2	0	2	y
DDB_G0269888	DDB_G0269888	2	0	2	n
DDB_G0269904	DDB_G0269904	2	0	2	y
DDB_G0269906	gtf2h5	1	1	2	y
DDB_G0269936	DDB_G0269936	1	1	2	n
DDB_G0269994	DDB_G0269994	2	0	2	y
DDB_G0270000	DDB_G0270000	1	1	2	y
DDB_G0270018	DDB_G0270018	1	1	2	n
DDB_G0270034	DDB_G0270034	2	0	2	y
DDB_G0270044	DDB_G0270044	2	0	2	n
DDB_G0270064	DDB_G0270064_RTE	2	0	2	y
DDB_G0270084	DDB_G0270084_ps	1	1	2	n
DDB_G0270134	DDB_G0270134	1	1	2	y
DDB_G0270194	DDB_G0270194	2	0	2	n
DDB_G0270212	DDB_G0270212	2	0	2	n
DDB_G0270214	DD7-1	2	0	2	n
DDB_G0270242	DDB_G0270242	2	0	2	y
DDB_G0270248	aplR	2	0	2	n
DDB_G0270254	DDB_G0270254	1	1	2	n
DDB_G0270258	DDB_G0270258	1	1	2	y
DDB_G0270260	nhp6	2	0	2	n
DDB_G0270300	DDB_G0270300	1	1	2	y
DDB_G0270348	DDB_G0270348	1	1	2	y
DDB_G0270380	rpl30	1	1	2	n
DDB_G0270384	tsn	2	0	2	n
DDB_G0270428	DDB_G0270428	2	0	2	y
DDB_G0270440	DDB_G0270440	2	0	2	n
DDB_G0270450	DDB_G0270450	2	0	2	y
DDB_G0270454	DDB_G0270454	2	0	2	n
DDB_G0270462	DDB_G0270462_RTE	2	0	2	n
DDB_G0270474	DDB_G0270474	1	1	2	y
DDB_G0270490	DDB_G0270490	2	0	2	y
DDB_G0270530	DDB_G0270530	1	1	2	n
DDB_G0270592	DDB_G0270592	1	1	2	y
DDB_G0270598	DDB_G0270598	1	1	2	y
DDB_G0270610	DDB_G0270610	1	1	2	y
DDB_G0270614	DDB_G0270614	2	0	2	y
DDB_G0270662	DDB_G0270662	1	1	2	n
DDB_G0270682	tspD	2	0	2	y
DDB_G0270698	cniA	1	1	2	y
DDB_G0270740	DDB_G0270740	2	0	2	n
DDB_G0270794	DDB_G0270794	1	1	2	y
DDB_G0270804	vps13D_ps1	2	0	2	n
DDB_G0270810	DDB_G0270810	1	1	2	n
DDB_G0270838	H3b	1	1	2	n
DDB_G0270840	DDB_G0270840_RTE	2	0	2	y
DDB_G0270892	DDB_G0270892	1	1	2	y
DDB_G0270898	DDB_G0270898	2	0	2	n
DDB_G0270916	DDB_G0270916	1	1	2	y
DDB_G0270922	DDB_G0270922	1	1	2	y
DDB_G0270942	DDB_G0270942	1	1	2	y
DDB_G0271084	DDB_G0271084	2	0	2	n
DDB_G0271104	DDB_G0271104	2	0	2	n
DDB_G0271142	proC	1	1	2	y
DDB_G0271154	DDB_G0271154_TE	1	1	2	n
DDB_G0271172	DDB_G0271172_TE	1	1	2	n
DDB_G0271178	DDB_G0271178	1	1	2	y
DDB_G0271196	DDB_G0271196	1	1	2	y
DDB_G0271244	DDB_G0271244	2	0	2	n
DDB_G0271246	med19	1	1	2	n
DDB_G0271322	DDB_G0271322_ps	1	1	2	n
DDB_G0271326	DDB_G0271326	1	1	2	y
DDB_G0271354	DDB_G0271354	2	0	2	n
DDB_G0271376	DDB_G0271376	1	1	2	y
DDB_G0271380	DDB_G0271380_ps	2	0	2	n
DDB_G0271534	DDB_G0271534	1	1	2	y
DDB_G0271536	rcnA	2	0	2	n
DDB_G0271546	DDB_G0271546	1	1	2	y
DDB_G0271592	DDB_G0271592	2	0	2	y
DDB_G0271706	tbcA	2	0	2	n
DDB_G0271724	DDB_G0271724	1	1	2	y
DDB_G0271768	pARTg_ps	2	0	2	n
DDB_G0271810	DDB_G0271810	1	1	2	n
DDB_G0271848	porA	1	1	2	n
DDB_G0271860	DDB_G0271860	2	0	2	y
DDB_G0271938	DDB_G0271938	1	1	2	n
DDB_G0271978	epnA_ps1	2	0	2	y
DDB_G0271982	DDB_G0271982	2	0	2	n
DDB_G0272040	DDB_G0272040	2	0	2	n
DDB_G0272128	DDB_G0272128	1	1	2	n
DDB_G0272142	DDB_G0272142	1	1	2	n
DDB_G0272146	DDB_G0272146	2	0	2	y
DDB_G0272148	DDB_G0272148	1	1	2	n
DDB_G0272178	DDB_G0272178	1	1	2	n
DDB_G0272180	DDB_G0272180	2	0	2	n
DDB_G0272188	DDB_G0272188	1	1	2	n
DDB_G0272204	DDB_G0272204	2	0	2	n
DDB_G0272228	DDB_G0272228	1	1	2	y
DDB_G0272328	DDB_G0272328	2	0	2	y
DDB_G0272402	DDB_G0272402	1	1	2	y
DDB_G0272514	DDB_G0272514	1	1	2	y
DDB_G0272516	DDB_G0272516	1	1	2	n
DDB_G0272526	sslA_ps2	2	0	2	y
DDB_G0272532	DDB_G0272532	1	1	2	n
DDB_G0272586	DDB_G0272586	1	1	2	n
DDB_G0272588	dpm2-1	1	1	2	n
DDB_G0272614	DDB_G0272614	1	1	2	n
DDB_G0272632	DDB_G0272632	2	0	2	n
DDB_G0272686	DDB_G0272686	1	1	2	y
DDB_G0272692	DDB_G0272692	1	1	2	n
DDB_G0272708	DDB_G0272708	1	1	2	n
DDB_G0272730	alg2	2	0	2	y
DDB_G0272734	DDB_G0272734	2	0	2	n
DDB_G0272742	DDB_G0272742	1	1	2	n
DDB_G0272744	DDB_G0272744	1	1	2	n
DDB_G0272750	DDB_G0272750_ps	1	1	2	n
DDB_G0272762	DDB_G0272762	2	0	2	y
DDB_G0272773	DDB_G0272773	1	1	2	y
DDB_G0272781	pmmB	2	0	2	y
DDB_G0272787	sds	1	1	2	y
DDB_G0272789	rlp24	1	1	2	n
DDB_G0272827	cbpI	2	0	2	y
DDB_G0272835	plip	2	0	2	y
DDB_G0272907	DDB_G0272907_ps	2	0	2	n
DDB_G0272959	cyp515A2_ps	2	0	2	y
DDB_G0273003	snrpD3	1	1	2	y
DDB_G0273019	DDB_G0273019_ps	1	1	2	y
DDB_G0273095	DDB_G0273095	2	0	2	n
DDB_G0273099	rsmE-1	1	1	2	y
DDB_G0273115	DDB_G0273115	1	1	2	y
DDB_G0273143	DDB_G0273143	1	1	2	n
DDB_G0273169	DDB_G0273169	1	1	2	n
DDB_G0273177	DDB_G0273177	2	0	2	y
DDB_G0273187	DDB_G0273187	1	1	2	y
DDB_G0273233	DDB_G0273233	2	0	2	y
DDB_G0273241	DDB_G0273241	1	1	2	y
DDB_G0273243	DDB_G0273243	1	1	2	n
DDB_G0273251	fpaB-1	1	1	2	n
DDB_G0273281	DDB_G0273281	2	0	2	n
DDB_G0273297	DDB_G0273297	2	0	2	n
DDB_G0273299	DDB_G0273299	2	0	2	y
DDB_G0273303	aslE_ps-1	1	1	2	n
DDB_G0273337	DDB_G0273337_ps	1	1	2	y
DDB_G0273373	DDB_G0273373	1	1	2	n
DDB_G0273403	DDB_G0273403	1	1	2	y
DDB_G0273575	DDB_G0273575	1	1	2	y
DDB_G0273607	DDB_G0273607	1	1	2	n
DDB_G0273615	fpaB-2	1	1	2	n
DDB_G0273667	DDB_G0273667	1	1	2	n
DDB_G0273677	DDB_G0273677	2	0	2	y
DDB_G0273715	aslE_ps-2	1	1	2	n
DDB_G0273763	DDB_G0273763	2	0	2	y
DDB_G0273769	DDB_G0273769	2	0	2	n
DDB_G0273799	DDB_G0273799	1	1	2	y
DDB_G0273815	DDB_G0273815	2	0	2	n
DDB_G0273823	DDB_G0273823	2	0	2	n
DDB_G0273825	rsmE-2	1	1	2	y
DDB_G0273841	DDB_G0273841	1	1	2	y
DDB_G0273845	DDB_G0273845_ps	1	1	2	y
DDB_G0273853	DDB_G0273853	1	1	2	y
DDB_G0273871	DDB_G0273871	2	0	2	y
DDB_G0273895	DDB_G0273895	1	1	2	n
DDB_G0273929	DDB_G0273929_ps	2	0	2	n
DDB_G0273981	dpm2-2	1	1	2	n
DDB_G0273989	DDB_G0273989	1	1	2	n
DDB_G0274025	DDB_G0274025	1	1	2	n
DDB_G0274081	DDB_G0274081	2	0	2	n
DDB_G0274125	gpgA	1	1	2	n
DDB_G0274169	DDB_G0274169	1	1	2	y
DDB_G0274175	DDB_G0274175	1	1	2	n
DDB_G0274181	DDB_G0274181	1	1	2	y
DDB_G0274239	eIF1	1	1	2	y
DDB_G0274261	DDB_G0274261	1	1	2	n
DDB_G0274265	DDB_G0274265	1	1	2	n
DDB_G0274287	fslC	1	1	2	n
DDB_G0274295	DDB_G0274295	2	0	2	y
DDB_G0274303	DDB_G0274303	1	1	2	n
DDB_G0274333	DDB_G0274333	1	1	2	y
DDB_G0274355	DDB_G0274355	1	1	2	n
DDB_G0274365	DDB_G0274365	2	0	2	y
DDB_G0274375	fba	1	1	2	y
DDB_G0274379	DDB_G0274379	2	0	2	y
DDB_G0274467	DDB_G0274467	1	1	2	y
DDB_G0274641	DDB_G0274641	1	1	2	n
DDB_G0274661	DDB_G0274661	1	1	2	n
DDB_G0274763	DDB_G0274763_RTE	2	0	2	y
DDB_G0274765	DDB_G0274765	2	0	2	y
DDB_G0274833	mapksp1	1	1	2	n
DDB_G0274873	pex19	2	0	2	n
DDB_G0274977	DDB_G0274977	1	1	2	y
DDB_G0275051	DDB_G0275051_ps	1	1	2	y
DDB_G0275095	mgmt	1	1	2	y
DDB_G0275193	hdaC_ps3	2	0	2	n
DDB_G0275237	DDB_G0275237	2	0	2	n
DDB_G0275335	DDB_G0275335	2	0	2	n
DDB_G0275343	DDB_G0275343	2	0	2	n
DDB_G0275353	DDB_G0275353	2	0	2	y
DDB_G0275379	DDB_G0275379	2	0	2	y
DDB_G0275437	7E	1	1	2	n
DDB_G0275439	cad2	2	0	2	y
DDB_G0275457	DDB_G0275457	1	1	2	y
DDB_G0275459	DDB_G0275459	2	0	2	n
DDB_G0275487	DDB_G0275487	1	1	2	y
DDB_G0275489	DDB_G0275489	1	1	2	n
DDB_G0275525	hspK	2	0	2	n
DDB_G0275549	DDB_G0275549	1	1	2	y
DDB_G0275573	vps32	1	1	2	n
DDB_G0275609	DDB_G0275609	1	1	2	y
DDB_G0275617	tbpA	2	0	2	n
DDB_G0275645	acn9	2	0	2	n
DDB_G0275673	DDB_G0275673	2	0	2	y
DDB_G0275677	DDB_G0275677	1	1	2	n
DDB_G0275721	DDB_G0275721	2	0	2	y
DDB_G0275761	DDB_G0275761	1	1	2	n
DDB_G0275783	DDB_G0275783	1	1	2	y
DDB_G0275793	DDB_G0275793	1	1	2	n
DDB_G0275807	DDB_G0275807	1	1	2	y
DDB_G0275817	DDB_G0275817	2	0	2	n
DDB_G0275831	DDB_G0275831	1	1	2	y
DDB_G0275859	DDB_G0275859	1	1	2	y
DDB_G0275935	DDB_G0275935	2	0	2	n
DDB_G0275949	DDB_G0275949	2	0	2	n
DDB_G0275955	rabH	2	0	2	y
DDB_G0275969	rab1E	1	1	2	n
DDB_G0275995	DDB_G0275995_ps	2	0	2	y
DDB_G0276003	hspG2	1	1	2	y
DDB_G0276033	cyb5A	1	1	2	n
DDB_G0276037	DDB_G0276037	2	0	2	y
DDB_G0276045	DDB_G0276045	1	1	2	y
DDB_G0276117	DDB_G0276117	2	0	2	n
DDB_G0276225	DDB_G0276225	1	1	2	n
DDB_G0276293	DDB_G0276293	2	0	2	n
DDB_G0276339	DDB_G0276339_ps	1	1	2	y
DDB_G0276381	DDB_G0276381	1	1	2	n
DDB_G0276461	DDB_G0276461	2	0	2	y
DDB_G0276471	DDB_G0276471	2	0	2	y
DDB_G0276483	DDB_G0276483	2	0	2	y
DDB_G0276485	DDB_G0276485	2	0	2	n
DDB_G0276509	DDB_G0276509	2	0	2	y
DDB_G0276521	DDB_G0276521	2	0	2	y
DDB_G0276533	DDB_G0276533	1	1	2	n
DDB_G0276535	DDB_G0276535	2	0	2	y
DDB_G0276537	DDB_G0276537	2	0	2	y
[truncated: 11,824 more rows]

## Sheet: summary
	DpnII	NlaIII	both
[truncated: 4 more rows]
