# Supplementary material for: Mutant resources for functional genomics in Dictyostelium discoideum using REMI-seq technology
Source: BMC Biol. 2021 Aug 24;19:172. doi: 10.1186/s12915-021-01108-y (PMC8386026; doi:10.1186/s12915-021-01108-y)
Supplement: Supplementary file 3 — Additional file 3. Indices present in different p-GWDI plasmids and Illumina adapter sequences. The ends of both arms contain indices specific for each arm and plasmid. p-GWDI G1, G2, G3 and G5 have GATC sticky ends and p-GWDI C4, C6, C7, C8 have CATG sticky ends. [file 12915_2021_1108_MOESM3_ESM.xlsx]

## Sheet: pGWDI_indices
Name	Enzyme	Site recognised in genome	Sticky end	LB index	RB index	rc-RB index
GWDI-G1	BamHI/DpnII+	GATC	GATC-	CGTGAT	CGATGT	ACATCG
GWDI-G2	BamHI/DpnII+	GATC	GATC-	GTAGCA	TCGGAA	TTCCGA
GWDI-G3	BamHI/DpnII+	GATC	GATC-	GAACGA	AGCCAA	TTGGCT
GWDI-C4	SphI/NlaIII$	CATG	-CATG	ATTGGC	CTTGTA	TACAAG
GWDI-G5	BamHI/DpnII+	GATC	GATC-	CATCCA	ACCGAT	ATCGGT
GWDI-C6	SphI/NlaIII$	CATG	-CATG	TGGTCA	TTAGGC	GCCTAA
GWDI-C7	SphI/NlaIII$	CATG	-CATG	ACATGT	GATTCG	CGAATC
GWDI-C8	SphI/NlaIII$	CATG	-CATG	CTGATC	GGAATC	GATTCC
All sequences are rewritten in the same orientation, unless reverse complement (rc) is specified
The secondary index is the EcoP15I site.
+ alternative enzymes to DpnII are Sau3A and MboI
$ alternative enzyme to NlaIII is Hsp92II
* can also be used with HpyCH4IV which recognises ACGT. 56.2% of genes have this site.

## Sheet: Illumina_adaptors
D501_a	AATGATACGGCGACCACCGAGATCTACACTATAGCCTACACTCTTTCCCTACACGACGCTCTTCCGATCTNN
D502_a	AATGATACGGCGACCACCGAGATCTACACATAGAGGCACACTCTTTCCCTACACGACGCTCTTCCGATCTNN
D503_a	AATGATACGGCGACCACCGAGATCTACACCCTATCCTACACTCTTTCCCTACACGACGCTCTTCCGATCTNN
D504_a	AATGATACGGCGACCACCGAGATCTACACGGCTCTGAACACTCTTTCCCTACACGACGCTCTTCCGATCTNN
D505_a	AATGATACGGCGACCACCGAGATCTACACAGGCGAAGACACTCTTTCCCTACACGACGCTCTTCCGATCTNN
D506_a	AATGATACGGCGACCACCGAGATCTACACTAATCTTAACACTCTTTCCCTACACGACGCTCTTCCGATCTNN
D507_a	AATGATACGGCGACCACCGAGATCTACACCAGGACGTACACTCTTTCCCTACACGACGCTCTTCCGATCTNN
D508_a	AATGATACGGCGACCACCGAGATCTACACGTACTGACACACTCTTTCCCTACACGACGCTCTTCCGATCTNN
D501_b	AGATCGGAAGAGCGTCGTGTAGGGAAAGAGTGTAGGCTATAGTGTAGATCTCGGTGGTCGCCGTATCATT
D502_b	AGATCGGAAGAGCGTCGTGTAGGGAAAGAGTGTGCCTCTATGTGTAGATCTCGGTGGTCGCCGTATCATT
D503_b	AGATCGGAAGAGCGTCGTGTAGGGAAAGAGTGTAGGATAGGGTGTAGATCTCGGTGGTCGCCGTATCATT
D504_b	AGATCGGAAGAGCGTCGTGTAGGGAAAGAGTGTTCAGAGCCGTGTAGATCTCGGTGGTCGCCGTATCATT
D505_b	AGATCGGAAGAGCGTCGTGTAGGGAAAGAGTGTCTTCGCCTGTGTAGATCTCGGTGGTCGCCGTATCATT
D506_b	AGATCGGAAGAGCGTCGTGTAGGGAAAGAGTGTTAAGATTAGTGTAGATCTCGGTGGTCGCCGTATCATT
D507_b	AGATCGGAAGAGCGTCGTGTAGGGAAAGAGTGTACGTCCTGGTGTAGATCTCGGTGGTCGCCGTATCATT
D508_b	AGATCGGAAGAGCGTCGTGTAGGGAAAGAGTGTGTCAGTACGTGTAGATCTCGGTGGTCGCCGTATCATT
D701_a	CAAGCAGAAGACGGCATACGAGATCGAGTAATGTGACTGGAGTTCAGACGTGTGCTCTTCCGATCTTTAT
D702_a	CAAGCAGAAGACGGCATACGAGATTCTCCGGAGTGACTGGAGTTCAGACGTGTGCTCTTCCGATCTTTAT
D703_a	CAAGCAGAAGACGGCATACGAGATAATGAGCGGTGACTGGAGTTCAGACGTGTGCTCTTCCGATCTTTAT
D704_a	CAAGCAGAAGACGGCATACGAGATGGAATCTCGTGACTGGAGTTCAGACGTGTGCTCTTCCGATCTTTAT
D705_a	CAAGCAGAAGACGGCATACGAGATTTCTGAATGTGACTGGAGTTCAGACGTGTGCTCTTCCGATCTTTAT
D706_a	CAAGCAGAAGACGGCATACGAGATACGAATTCGTGACTGGAGTTCAGACGTGTGCTCTTCCGATCTTTAT
D707_a	CAAGCAGAAGACGGCATACGAGATAGCTTCAGGTGACTGGAGTTCAGACGTGTGCTCTTCCGATCTTTAT
D708_a	CAAGCAGAAGACGGCATACGAGATGCGCATTAGTGACTGGAGTTCAGACGTGTGCTCTTCCGATCTTTAT
D709_a	CAAGCAGAAGACGGCATACGAGATCATAGCCGGTGACTGGAGTTCAGACGTGTGCTCTTCCGATCTTTAT
D710_a	CAAGCAGAAGACGGCATACGAGATTTCGCGGAGTGACTGGAGTTCAGACGTGTGCTCTTCCGATCTTTAT
D711_a	CAAGCAGAAGACGGCATACGAGATGCGCGAGAGTGACTGGAGTTCAGACGTGTGCTCTTCCGATCTTTAT
D712_a	CAAGCAGAAGACGGCATACGAGATCTATCGCTGTGACTGGAGTTCAGACGTGTGCTCTTCCGATCTTTAT
D701_b	AGATCGGAAGAGCACACGTCTGAACTCCAGTCACATTACTCGATCTCGTATGCCGTCTTCTGCTTG
D702_b	AGATCGGAAGAGCACACGTCTGAACTCCAGTCACTCCGGAGAATCTCGTATGCCGTCTTCTGCTTG
D703_b	AGATCGGAAGAGCACACGTCTGAACTCCAGTCACCGCTCATTATCTCGTATGCCGTCTTCTGCTTG
D704_b	AGATCGGAAGAGCACACGTCTGAACTCCAGTCACGAGATTCCATCTCGTATGCCGTCTTCTGCTTG
D705_b	AGATCGGAAGAGCACACGTCTGAACTCCAGTCACATTCAGAAATCTCGTATGCCGTCTTCTGCTTG
D706_b	AGATCGGAAGAGCACACGTCTGAACTCCAGTCACGAATTCGTATCTCGTATGCCGTCTTCTGCTTG
D707_b	AGATCGGAAGAGCACACGTCTGAACTCCAGTCACCTGAAGCTATCTCGTATGCCGTCTTCTGCTTG
D708_b	AGATCGGAAGAGCACACGTCTGAACTCCAGTCACTAATGCGCATCTCGTATGCCGTCTTCTGCTTG
D709_b	AGATCGGAAGAGCACACGTCTGAACTCCAGTCACCGGCTATGATCTCGTATGCCGTCTTCTGCTTG
D710_b	AGATCGGAAGAGCACACGTCTGAACTCCAGTCACTCCGCGAAATCTCGTATGCCGTCTTCTGCTTG
D711_b	AGATCGGAAGAGCACACGTCTGAACTCCAGTCACTCTCGCGCATCTCGTATGCCGTCTTCTGCTTG
D712_b	AGATCGGAAGAGCACACGTCTGAACTCCAGTCACAGCGATAGATCTCGTATGCCGTCTTCTGCTTG
P5_Illumina	AATGATACGGCGACCACCGA

## Sheet: AJBgwdi_oligos
AJBgwdi001-F	5’-CGGATCCGTTGGACTGCTG[iLB]TAGGGATAACAGGGTAATA-3’
AJBgwdi002-R	5’-agctTATTACCCTGTTATCCCTA[rc-iLB]CAGCAGTCCAACGGATCCGgtac-3’
AJBgwdi003-F	5’-GATTACCCTGTTATCCCTA[iRB]CAGCAGTCCAACGGATCCA-3’
AJBgwdi004-R	5’-CTAGTGGATCCGTTGGACTGCTG[rc-iRB]TAGGGATAACAGGGTAATCTGCA-3’
