# Supplementary material for: Mutant resources for functional genomics in Dictyostelium discoideum using REMI-seq technology
Source: BMC Biol. 2021 Aug 24;19:172. doi: 10.1186/s12915-021-01108-y (PMC8386026; doi:10.1186/s12915-021-01108-y)
Supplement: Supplementary file 5 — Additional file 5. Analyses of frequency of gene disruptions per site. Genes were grouped according to the number of possible insertions sites. The expected number of insertions for each gene was calculated based on a Poisson process and compared to the observed number of insertions in each gene. [file 12915_2021_1108_MOESM5_ESM.xlsx]

## Sheet: Sheet1
Observed												expected											obs_total	obs_freq		exp_total	exp_freq		log_likeli_ratio
Count (class)	1	2	3	4	5	6	7	8	9	10		1	2	3	4	5	6	7	8	9	10
0	1115	1004	905	726	663	516	451	351	304	271		944.714	777.307	632.035	512.787	440.919	346.138	273.341	210.435	190.615	164.886		6306	0.682246		4493.18	0.486117		0.488989		(O-E)^2)/E
1	57	109	121	176	148	173	162	125	118	110		269.811	380.997	405.744	390.428	363.265	318.223	297.271	239.582	207.454	186.505		1299	0.140539		3059.28	0.330984		-1.23579		731.403	8006.95
2	33	73	70	86	94	75	85	78	67	57		38.5291	93.3727	130.237	148.633	149.643	146.28	161.648	136.383	112.89	105.479		718	0.0776804		1223.1	0.132327		-0.768482		1012.85	0
3	19	30	39	46	30	40	35	42	26	26		3.66798	15.2555	27.8692	37.7223	41.0961	44.8278	58.6	51.7577	40.9542	39.7698		333	0.0360273		361.521	0.0391129		-0.118555		208.587
4	13	22	20	25	22	23	33	27	16	15		0.261894	1.86937	4.47276	7.18029	8.46457	10.3032	15.9325	14.7316	11.143	11.2461		216	0.023369		85.6053	0.00926164		1.33526		2.24999
5	10	15	14	17	19	18	15	9	13	10		0.0149594	0.183255	0.574271	1.09339	1.39476	1.89445	3.46548	3.35442	2.42548	2.54412		140	0.0151466	371	16.9446	0.00183323	20.3204	3.04653		6051.86
6	3	7	8	8	12	9	8	6	10	8		0.000712071	0.0149704	0.0614436	0.138749	0.191519	0.290279	0.628144	0.636506	0.439957	0.479615		79	0.00854701		2.88189	0.000311792		4.77676
7	1	5	9	3	3	0	2	7	5	3		2.90525e-05	0.00104825	0.00563495	0.0150916	0.0225413	0.0381242	0.0975909	0.103524	0.0684032	0.0775		38	0.00411122		0.429487	4.64662e-05		6.46724
8	4	1	6	4	4	9	8	7	3	5		1.03718e-06	6.42247e-05	0.00045218	0.00143631	0.00232142	0.00438121	0.0132668	0.0147329	0.00930573	0.0109577		51	0.00551769		0.0569195	6.15812e-06		9.80736
9	0	1	6	6	6	3	8	3	2	3		3.29132e-08	3.49774e-06	3.22538e-05	0.000121509	0.000212508	0.000447543	0.00160314	0.00186372	0.00112531	0.00137716		38	0.00411122		0.00678667	7.3425e-07		12.451
10	2	2	3	1	4	2	4	2	2	3		9.40003e-10	1.71442e-07	2.07058e-06	9.25153e-06	1.75081e-05	4.11451e-05	0.000174349	0.000212186	0.000122472	0.000155772		25	0.00270475		0.000734927	7.95117e-08		15.054
