# Supplementary material for: Mutant resources for functional genomics in Dictyostelium discoideum using REMI-seq technology
Source: BMC Biol. 2021 Aug 24;19:172. doi: 10.1186/s12915-021-01108-y (PMC8386026; doi:10.1186/s12915-021-01108-y)
Supplement: Supplementary file 11 — Additional file 11. List of mutations and associated genes that affect growth on bacteria or in axenic medium when disrupted. [file 12915_2021_1108_MOESM11_ESM.xls]

## Sheet: Sfile9.txt
chr	pos	ID	Gene_ID	z.mean.Ka.r10	z.mean.Ka.r20	z.mean.Ax.r3	z.mean.Ax.r6	z.mean.Ax.r10	Ka.r10.phen	Ka.r20.phen	Ax.r3.phen	Ax.r6.phen	Ax.r10.phen
DDB0220052	10502	DDB0220052_10502	NA	0.435969	-1.32967	1.21253	2.95821	3.6285	0	0	0	1	1
DDB0232428	15394	DDB0232428_15394	NA	0.434632	0.00690366	-0.783949	-1.57282	0.524103	0	0	0	-1	0
DDB0232428	28522	DDB0232428_28522	DDB_G0267208	-1.12221	0.498654	-1.87513	0.417148	-0.710572	-1	0	-1	0	0
DDB0232428	37962	DDB0232428_37962	DDB_G0267220	-1.08915	-0.191141	-2.67335	-0.649807	-0.227461	-1	0	-1	0	0
DDB0232428	58858	DDB0232428_58858	DDB_G0267244	0.516042	0.428948	-1.94477	-0.431237	1.08049	0	0	-1	0	0
DDB0232428	85261	DDB0232428_85261	NA	0.356927	0.73403	-1.58352	-0.914109	-0.962195	0	0	-1	0	0
DDB0232428	101118	DDB0232428_101118	NA	-0.652143	0.443804	0.70771	-1.28138	-0.650103	0	0	0	-1	0
DDB0232428	181354	DDB0232428_181354	NA	-0.795722	-1.12359	0.779063	0.0957582	0.267199	0	-1	0	0	0
DDB0232428	201627	DDB0232428_201627	DDB_G0267458	-2.31177	-2.0165	-0.292995	0.606659	-0.941372	-1	-1	0	0	0
DDB0232428	202650	DDB0232428_202650	DDB_G0267458	0.657883	-1.02475	-3.69087	-1.25031	-0.48929	0	-1	-1	-1	0
DDB0232428	262826	DDB0232428_262826	NA	0.693169	0.87368	0.635812	-1.2885	-0.538023	0	0	0	-1	0
DDB0232428	271521	DDB0232428_271521	DDB_G0267524	-2.34813	-1.21016	2.33932	2.48643	5.00706	-1	-1	1	1	1
DDB0232428	272275	DDB0232428_272275	NA	-1.217	-0.889472	1.76394	2.00455	3.93991	-1	0	1	1	1
DDB0232428	276959	DDB0232428_276959	DDB_G0267530	-0.693494	-1.67344	0.670731	1.75529	-0.652714	0	0	0	1	0
DDB0232428	318613	DDB0232428_318613	DDB_G0268482	1.51704	1.06103	-1.75731	-1.16636	-1.62884	1	0	0	0	0
DDB0232428	345067	DDB0232428_345067	DDB_G0267566	1.20509	1.83382	1.21131	0.0980256	-0.784046	0	1	0	0	0
DDB0232428	374851	DDB0232428_374851	DDB_G0267584	-0.867419	0.666815	-1.37961	-0.105105	-0.576864	0	0	-1	0	0
DDB0232428	405672	DDB0232428_405672	DDB_G0267602	0.314138	0.687805	0.246183	-0.202123	-1.32797	0	0	0	0	-1
DDB0232428	608984	DDB0232428_608984	DDB_G0267430	-0.709551	-0.0778221	0.532876	0.772875	2.20557	0	0	0	0	1
DDB0232428	631486	DDB0232428_631486	DDB_G0267472	0.680706	-1.01317	0.0433889	0.878262	-0.533958	0	-1	0	0	0
DDB0232428	649364	DDB0232428_649364	DDB_G0268504	0.842962	1.62686	0.0582631	-0.221208	0.18783	0	1	0	0	0
DDB0232428	652970	DDB0232428_652970	DDB_G0268504	-1.04168	0.186125	-1.75609	-0.180739	-0.365287	-1	0	-1	0	0
DDB0232428	700386	DDB0232428_700386	NA	-1.01248	-1.824	-0.375904	0.170488	-0.708297	-1	-1	0	0	0
DDB0232428	711653	DDB0232428_711653	DDB_G0267726	-1.50101	-0.480744	1.55266	1.59149	1.43325	0	0	1	1	0
DDB0232428	798220	DDB0232428_798220	DDB_G0268344	0.487642	-1.16657	0.186141	0.873337	-0.233297	0	-1	0	0	0
DDB0232428	850496	DDB0232428_850496	DDB_G0267784	2.62683	0.505239	3.12325	0.744122	1.09664	0	0	1	0	0
DDB0232428	871946	DDB0232428_871946	DDB_G0268348	-1.87643	-1.61791	0.148275	0.532692	-0.458766	-1	-1	0	0	0
DDB0232428	887815	DDB0232428_887815	DDB_G0268352	-0.969764	-0.99481	2.32083	3.10838	3.96217	0	0	1	1	1
DDB0232428	891329	DDB0232428_891329	DDB_G0267800	-1.55867	-1.86705	0.328927	0.224408	-0.760425	-1	-1	0	0	0
DDB0232428	891427	DDB0232428_891427	DDB_G0267800	-2.27901	-1.3486	-0.596298	0.744377	1.2489	-1	-1	0	0	0
DDB0232428	910134	DDB0232428_910134	NA	1.24633	1.22464	0.486405	-1.20583	-0.432511	0	0	0	-1	0
DDB0232428	921866	DDB0232428_921866	DDB_G0267822	-0.38504	-1.88676	1.23537	1.37123	2.00399	0	-1	0	0	1
DDB0232428	961864	DDB0232428_961864	DDB_G0267844	0.997824	0.911875	1.08604	1.62704	3.51735	0	0	0	1	1
DDB0232428	963004	DDB0232428_963004	DDB_G0267846	0.177361	0.45434	-0.301118	-1.26796	0.152569	0	0	0	-1	0
DDB0232428	999743	DDB0232428_999743	NA	0.377998	0.760385	0.318843	-1.29987	-0.638122	0	0	0	-1	0
DDB0232428	1115121	DDB0232428_1115121	DDB_G0267916	-0.506473	-0.342119	-0.659533	-1.16066	-0.374866	0	0	0	-1	0
DDB0232428	1138345	DDB0232428_1138345	DDB_G0268394	0.137044	-0.624989	0.326993	1.0369	2.6278	0	0	0	0	1
DDB0232428	1164929	DDB0232428_1164929	DDB_G0267942	-0.904858	-0.0401875	1.53209	0.227852	0.57203	0	0	1	0	0
DDB0232428	1203227	DDB0232428_1203227	DDB_G0267966	1.14631	0.053857	1.41437	2.16322	0.327956	0	0	0	1	0
DDB0232428	1236222	DDB0232428_1236222	DDB_G0267984	-0.904363	-1.54556	-1.99241	-0.284617	-0.371155	0	-1	-1	0	0
DDB0232428	1236441	DDB0232428_1236441	DDB_G0267984	0.152336	0.928997	-0.921134	-1.5435	-0.863474	0	0	0	-1	0
DDB0232428	1236468	DDB0232428_1236468	DDB_G0267984	-0.86984	0.244057	3.39191	1.33902	0.0939356	0	0	1	0	0
DDB0232428	1293716	DDB0232428_1293716	DDB_G0268558	-2.06364	-0.779141	-0.0873575	0.726764	-0.666307	-1	0	0	0	0
DDB0232428	1305686	DDB0232428_1305686	NA	-0.457206	0.209192	-0.704232	-1.3975	0.0744432	0	0	0	-1	0
DDB0232428	1316481	DDB0232428_1316481	DDB_G0268018	-1.9672	-1.70102	-0.194592	-0.172327	0.21557	-1	-1	0	0	0
DDB0232428	1375778	DDB0232428_1375778	DDB_G0268426	1.26017	1.38743	-2.00719	-1.18231	-1.0483	0	0	-1	-1	-1
DDB0232428	1540919	DDB0232428_1540919	DDB_G0268446	0.498671	0.583169	0.397185	-1.52358	-0.959214	0	0	0	-1	0
DDB0232428	1566602	DDB0232428_1566602	DDB_G0268578	1.79283	2.35285	0.741645	0.460006	-0.0879977	1	1	0	0	0
DDB0232428	1571088	DDB0232428_1571088	DDB_G0267426	-0.730442	-1.60175	-0.0414107	-0.292017	-0.4392	0	-1	0	0	0
DDB0232428	1581175	DDB0232428_1581175	DDB_G0268162	-0.36546	-0.421295	-0.157153	-1.21139	-0.439608	0	0	0	-1	0
DDB0232428	1697663	DDB0232428_1697663	DDB_G0268214	-1.02778	-1.80892	0.00525823	-0.343077	-0.00687786	-1	-1	0	0	0
DDB0232428	1727571	DDB0232428_1727571	DDB_G0268230	-1.90857	-1.07246	-3.6987	-1.25431	-0.494396	-1	-1	-1	-1	0
DDB0232428	1801195	DDB0232428_1801195	DDB_G0268640	0.770705	0.239823	0.0144369	-0.311207	-1.15849	0	0	0	0	-1
DDB0232428	1801348	DDB0232428_1801348	DDB_G0268640	-1.80449	-0.863954	-0.210283	-0.302058	0.170359	-1	0	0	0	0
DDB0232428	1844232	DDB0232428_1844232	DDB_G0268650	-1.90361	-1.6428	-1.9904	-1.25001	-0.488902	-1	-1	-1	-1	0
DDB0232428	1863520	DDB0232428_1863520	NA	2.05792	0.446059	1.2782	1.64844	-0.233191	1	0	0	0	0
DDB0232428	1923163	DDB0232428_1923163	DDB_G0268686	-0.755621	-0.299697	-1.15893	-1.62809	-0.971432	0	0	-1	-1	0
DDB0232428	1968195	DDB0232428_1968195	DDB_G0268710	0.0261126	0.203938	-1.13975	-1.3776	-0.651738	0	0	-1	-1	0
DDB0232428	1980965	DDB0232428_1980965	DDB_G0268946	0.83669	1.38028	1.14105	1.71025	-0.146143	0	0	0	1	0
DDB0232428	1994782	DDB0232428_1994782	DDB_G0268720	-0.895229	-0.298877	-1.51929	-1.33074	-0.591941	0	0	-1	-1	0
DDB0232428	1996884	DDB0232428_1996884	DDB_G0294701	0.573344	-0.727197	0.488382	-1.03139	-0.0316178	0	0	0	-1	0
DDB0232428	2116087	DDB0232428_2116087	DDB_G0269086	-1.8933	-1.63336	0.288219	0.833602	-0.477472	-1	-1	0	0	0
DDB0232428	2160804	DDB0232428_2160804	DDB_G0268816	0.335062	0.364933	-0.0155269	-1.36607	-0.58651	0	0	0	-1	0
DDB0232428	2198561	DDB0232428_2198561	DDB_G0268838	-0.0610626	-1.01623	0.281159	0.983454	0.763213	0	-1	0	0	0
DDB0232428	2248155	DDB0232428_2248155	DDB_G0268852	0.25618	-1.13097	0.106706	1.04398	-0.108454	0	-1	0	0	0
DDB0232428	2262471	DDB0232428_2262471	DDB_G0268856	0.985393	0.840982	0.837456	0.950957	-1.06142	0	0	0	0	-1
DDB0232428	2296430	DDB0232428_2296430	DDB_G0268874	0.989848	1.33444	0.559094	-1.07251	1.14209	0	0	0	-1	0
DDB0232428	2298634	DDB0232428_2298634	DDB_G0268876	0.400486	0.786722	1.11987	-1.07346	-0.744475	0	0	0	-1	0
DDB0232428	2328646	DDB0232428_2328646	DDB_G0268888	0.355895	-1.63245	-1.93709	-1.24018	-0.476362	0	-1	-1	-1	0
DDB0232428	2354934	DDB0232428_2354934	DDB_G0268904	-0.878756	-1.70329	1.60616	-0.357717	0.893465	0	-1	1	0	0
DDB0232428	2367279	DDB0232428_2367279	NA	0.00726854	-1.39977	0.813087	-0.494771	-1.07602	0	-1	0	0	-1
DDB0232428	2374716	DDB0232428_2374716	DDB_G0268914	-1.89874	-1.63834	1.26792	1.24459	0.436601	-1	-1	0	0	0
DDB0232428	2464252	DDB0232428_2464252	DDB_G0269288	0.336006	0.336426	-0.144087	-0.423955	-1.00685	0	0	0	0	-1
DDB0232428	2475732	DDB0232428_2475732	DDB_G0269296	-1.0849	-0.767256	-2.78136	-1.15463	-0.548961	-1	0	-1	-1	0
DDB0232428	2480608	DDB0232428_2480608	NA	-0.209607	-0.241512	2.32379	2.70896	0.238302	0	0	0	1	0
DDB0232428	2521598	DDB0232428_2521598	DDB_G0270478	-0.269604	0.808416	-1.69641	0.0652638	-0.457007	0	0	-1	0	0
DDB0232428	2556434	DDB0232428_2556434	DDB_G0269332	-1.9618	-0.780275	0.00868557	0.757238	-0.553406	-1	0	0	0	0
DDB0232428	2561006	DDB0232428_2561006	DDB_G0269336	-2.24636	-1.95661	-0.406898	-0.634891	-0.868862	-1	-1	0	0	0
DDB0232428	2565394	DDB0232428_2565394	DDB_G0269338	0.0035789	-0.86252	0.321642	0.789021	2.24526	0	0	0	0	1
DDB0232428	2581779	DDB0232428_2581779	DDB_G0270854	0.397682	-1.07396	0.366919	0.239114	-0.0759578	0	-1	0	0	0
DDB0232428	2589536	DDB0232428_2589536	NA	-0.620649	-0.546406	-0.194992	-1.22717	-0.459751	0	0	0	-1	0
DDB0232428	2615841	DDB0232428_2615841	DDB_G0269364	-0.0317055	-0.697236	-0.926128	-1.21264	-0.905254	0	0	0	-1	0
DDB0232428	2645761	DDB0232428_2645761	DDB_G0269380	-0.939558	-1.11164	0.0689887	-0.0164912	-0.375148	0	-1	0	0	0
DDB0232428	2648119	DDB0232428_2648119	DDB_G0269380	-1.08054	-1.67866	-3.75685	-1.28403	-0.532319	-1	-1	-1	-1	0
DDB0232428	2657023	DDB0232428_2657023	DDB_G0269384	-1.10235	0.511464	-0.757145	-1.45915	0.246027	-1	0	0	-1	0
DDB0232428	2671278	DDB0232428_2671278	NA	-1.79834	-0.0224613	0.0405391	-1.15857	-0.372196	-1	0	0	-1	0
DDB0232428	2680720	DDB0232428_2680720	DDB_G0269388	-1.92049	-1.65825	0.634773	0.273323	1.97592	-1	-1	0	0	0
DDB0232428	2689548	DDB0232428_2689548	DDB_G0269392	0.446677	-0.221372	-0.604357	-1.34729	-0.613065	0	0	0	-1	0
DDB0232428	2767188	DDB0232428_2767188	DDB_G0270520	-0.648803	-1.41971	0.781834	1.2748	0.922596	0	-1	0	0	0
DDB0232428	2800215	DDB0232428_2800215	DDB_G0269452	-1.03703	-1.71603	-0.373259	-0.587054	-0.577562	-1	-1	0	0	0
DDB0232428	2817696	DDB0232428_2817696	NA	0.269523	-0.935638	-0.169817	-1.36787	-0.639322	0	0	0	-1	0
DDB0232428	2842226	DDB0232428_2842226	DDB_G0269474	0.556824	0.784962	0.474579	1.55289	0.447566	0	0	0	1	0
DDB0232428	2850474	DDB0232428_2850474	DDB_G0270872	-1.16605	0.0105198	0.261967	0.4061	-0.497838	-1	0	0	0	0
DDB0232428	2861962	DDB0232428_2861962	DDB_G0269486	-1.91704	-1.6551	0.986012	1.09799	2.28775	-1	-1	0	0	1
DDB0232428	3013890	DDB0232428_3013890	DDB_G0269564	-0.650054	-1.20968	0.0401726	-1.42216	-0.708618	0	-1	0	-1	0
DDB0232428	3028998	DDB0232428_3028998	NA	-0.626814	-0.480089	-0.371057	-1.36037	0.225635	0	0	0	-1	0
DDB0232428	3084995	DDB0232428_3084995	DDB_G0269592	1.58114	1.54435	-0.239041	-0.841262	-0.692156	1	0	0	0	0
DDB0232428	3090763	DDB0232428_3090763	DDB_G0269596	0.296213	1.82497	-1.51299	0.348857	-0.816344	0	1	0	0	0
DDB0232428	3136237	DDB0232428_3136237	DDB_G0269610	0.743449	0.619767	0.148238	1.03788	2.74455	0	0	0	0	1
DDB0232428	3166957	DDB0232428_3166957	DDB_G0269112	-1.82989	-1.5753	-0.0705641	-0.253237	-0.407169	-1	-1	0	0	0
DDB0232428	3171960	DDB0232428_3171960	DDB_G0269624	-0.411537	-0.650863	1.0978	1.08955	3.12364	0	0	0	0	1
DDB0232428	3180021	DDB0232428_3180021	DDB_G0269626	0.593814	-0.264563	-0.0843548	-0.194505	-1.09912	0	0	0	0	-1
DDB0232428	3182265	DDB0232428_3182265	DDB_G0270586	0.582224	0.594278	0.625369	0.624201	2.45495	0	0	0	0	1
DDB0232428	3269608	DDB0232428_3269608	DDB_G0295751	-1.82557	-1.57134	0.694158	-0.245513	-0.40238	-1	-1	0	0	0
DDB0232428	3301911	DDB0232428_3301911	DDB_G0269678	-0.0984595	0.278303	0.205491	0.0627635	-1.37646	0	0	0	0	-1
DDB0232428	3353308	DDB0232428_3353308	DDB_G0269700	-0.741513	-0.947988	-0.443789	-1.4252	-0.712488	0	0	0	-1	0
DDB0232428	3373752	DDB0232428_3373752	DDB_G0269706	-1.96707	0.0551502	0.287217	0.233562	0.356801	-1	0	0	0	0
DDB0232428	3396580	DDB0232428_3396580	NA	0.277654	0.452149	0.431046	0.173534	-1.0113	0	0	0	0	-1
DDB0232428	3440035	DDB0232428_3440035	DDB_G0269166	1.62235	1.77303	0.812901	-1.06751	-0.947428	1	1	0	0	0
DDB0232428	3487098	DDB0232428_3487098	DDB_G0270934	-1.14996	-0.547795	-0.0223257	-1.17279	-0.604049	-1	0	0	-1	0
DDB0232428	3502086	DDB0232428_3502086	DDB_G0269124	1.50413	1.77081	0.409447	2.06285	0.440601	0	1	0	1	0
DDB0232428	3518139	DDB0232428_3518139	DDB_G0269766	-1.03459	-0.889036	-0.156321	-1.21654	-0.44618	-1	0	0	-1	0
DDB0232428	3521811	DDB0232428_3521811	DDB_G0269768	-0.0289726	-1.19029	-0.315139	1.06208	1.425	0	-1	0	0	0
DDB0232428	3522653	DDB0232428_3522653	DDB_G0269768	0.271525	-1.04184	0.498592	0.861057	-0.110508	0	-1	0	0	0
DDB0232428	3524258	DDB0232428_3524258	DDB_G0269770	-1.00482	-1.93098	0.133636	0.298432	-0.837832	-1	-1	0	0	0
DDB0232428	3534706	DDB0232428_3534706	DDB_G0270636	-1.33587	-0.77316	-1.73221	-1.53891	-0.857616	-1	0	-1	-1	0
DDB0232428	3542493	DDB0232428_3542493	DDB_G0269222	1.83065	2.2086	1.61735	-0.164508	1.67374	0	1	0	0	0
DDB0232428	3574690	DDB0232428_3574690	DDB_G0270954	-0.433838	-0.833072	-1.1622	-0.469387	0.242799	0	0	-1	0	0
DDB0232428	3582360	DDB0232428_3582360	DDB_G0270640	1.2434	0.497451	2.08292	2.1184	3.92407	0	0	1	1	1
DDB0232428	3582734	DDB0232428_3582734	DDB_G0270640	1.35404	1.08665	1.43213	1.81878	3.6923	0	0	0	1	1
DDB0232428	3626402	DDB0232428_3626402	NA	0.437029	0.336381	-1.86143	0.0846691	0.701072	0	0	-1	0	0
DDB0232428	3661427	DDB0232428_3661427	DDB_G0270654	-1.29892	0.0354774	0.638588	0.248939	0.651983	-1	0	0	0	0
DDB0232428	3713493	DDB0232428_3713493	DDB_G0270666	0.820434	0.611502	0.0547628	-1.26792	0.785596	0	0	0	-1	0
DDB0232428	3764029	DDB0232428_3764029	DDB_G0269864	-0.0674295	0.39177	0.430919	0.236584	-1.15457	0	0	0	0	-1
DDB0232428	3848135	DDB0232428_3848135	DDB_G0269910	-1.01893	-1.11251	-0.0495377	-1.04052	-0.872501	-1	-1	0	-1	0
DDB0232428	3848228	DDB0232428_3848228	DDB_G0269910	-0.286283	-0.84258	-1.86727	-0.690702	-0.822332	0	0	-1	0	0
DDB0232428	3848243	DDB0232428_3848243	DDB_G0269910	0.704845	-0.0385015	0.25469	-0.681276	-1.18444	0	0	0	0	-1
DDB0232428	3961876	DDB0232428_3961876	DDB_G0269980	-0.0545443	-1.68518	-0.267658	0.627823	0.158987	0	-1	0	0	0
DDB0232428	4027931	DDB0232428_4027931	NA	-1.0298	-0.470094	-1.96076	-0.396099	0.259814	-1	0	-1	0	0
DDB0232428	4047430	DDB0232428_4047430	DDB_G0269252	0.151197	0.446992	0.99141	1.41781	2.24609	0	0	0	0	1
DDB0232428	4075368	DDB0232428_4075368	DDB_G0270038	-2.242	-1.95262	-0.388644	0.764736	1.57196	-1	-1	0	0	0
DDB0232428	4080119	DDB0232428_4080119	DDB_G0270710	0.41996	-0.639774	-0.884256	-1.69053	-1.05112	0	0	0	-1	-1
DDB0232428	4102685	DDB0232428_4102685	DDB_G0270718	-1.28319	-0.446506	-2.06147	-0.462815	0.00410019	-1	0	-1	0	0
DDB0232428	4110996	DDB0232428_4110996	DDB_G0270052	-0.69572	-0.175238	-0.91126	-1.21312	-0.441827	0	0	0	-1	0
DDB0232428	4125222	DDB0232428_4125222	DDB_G0294741	-1.0244	0.690124	0.478845	0.543384	0.151287	-1	0	0	0	0
DDB0232428	4186572	DDB0232428_4186572	NA	-0.620448	-0.299276	-2.79849	-0.568037	-0.649705	0	0	-1	0	0
DDB0232428	4206625	DDB0232428_4206625	DDB_G0270096	-2.29087	-1.99736	0.0510954	0.665898	0.0177973	-1	-1	0	0	0
DDB0232428	4218470	DDB0232428_4218470	DDB_G0270726	1.16674	0.0778258	1.36282	1.51994	-1.30633	0	0	0	1	0
DDB0232428	4222945	DDB0232428_4222945	DDB_G0270102	-1.95612	-1.34433	2.88909	2.6971	3.3851	-1	-1	1	1	1
DDB0232428	4243616	DDB0232428_4243616	DDB_G0270108	-0.587901	-1.26318	0.144676	0.0668586	-0.712219	0	-1	0	0	0
DDB0232428	4345473	DDB0232428_4345473	DDB_G0270162	-0.846306	-0.912102	-0.114675	-1.1547	-0.367257	0	0	0	-1	0
DDB0232428	4380390	DDB0232428_4380390	DDB_G0270184	-1.90062	-1.64006	-0.354636	-0.341315	2.65502	-1	-1	0	0	1
DDB0232428	4500886	DDB0232428_4500886	DDB_G0270766	2.15527	1.69185	1.48246	0.938117	-1.07785	1	1	0	0	0
DDB0232428	4503622	DDB0232428_4503622	DDB_G0271052	-2.284	-1.99107	-2.38461	-1.58041	-0.910583	-1	-1	-1	-1	0
DDB0232428	4513163	DDB0232428_4513163	NA	-0.106574	-0.611198	-1.07763	-0.38358	-0.611363	0	0	-1	0	0
DDB0232428	4554945	DDB0232428_4554945	DDB_G0269100	-1.99998	-1.73103	0.797461	1.00337	0.910306	-1	-1	0	0	0
DDB0232428	4555320	DDB0232428_4555320	DDB_G0269100	-2.07336	-0.959132	0.895151	-0.865589	-0.313919	-1	0	0	0	0
DDB0232428	4573388	DDB0232428_4573388	DDB_G0271058	-1.10432	0.525154	0.0544194	-0.831154	0.209442	-1	0	0	0	0
DDB0232428	4615258	DDB0232428_4615258	DDB_G0270310	-1.81828	-1.56467	-2.12137	-0.392825	-0.394303	-1	-1	-1	0	0
DDB0232428	4618827	DDB0232428_4618827	DDB_G0271066	-0.773254	-0.826193	-1.28727	-1.22322	0.252169	0	0	-1	-1	0
DDB0232428	4624308	DDB0232428_4624308	DDB_G0270774	-1.22114	-0.267004	1.07681	1.66473	1.71919	-1	0	0	1	1
DDB0232428	4637945	DDB0232428_4637945	DDB_G0270318	0.498702	0.572208	0.700482	-1.25473	-0.000746819	0	0	0	-1	0
DDB0232428	4660425	DDB0232428_4660425	DDB_G0270778	-1.01788	-1.88849	-0.574163	-1.48309	-0.786381	-1	-1	0	-1	0
DDB0232428	4716935	DDB0232428_4716935	NA	-1.06079	0.419407	-2.23207	-0.174181	0.0145752	-1	0	-1	0	0
DDB0232428	4719876	DDB0232428_4719876	DDB_G0270366	0.317879	0.440342	0.221544	-0.467917	-1.44229	0	0	0	0	-1
DDB0232428	4791830	DDB0232428_4791830	DDB_G0270404	-1.25018	-0.389791	1.00089	1.56486	-0.330952	0	0	0	1	0
DDB0232428	4793621	DDB0232428_4793621	DDB_G0269184	-0.0117521	0.217349	0.499956	-1.39971	-0.679958	0	0	0	-1	0
DDB0232428	4801528	DDB0232428_4801528	DDB_G0270806	-1.06406	-1.04763	0.203775	0.502289	0.69587	-1	-1	0	0	0
DDB0232428	4851601	DDB0232428_4851601	DDB_G0270426	-1.41311	-0.444631	-2.07648	-1.30818	0.224672	-1	0	-1	-1	0
DDB0232428	4857767	DDB0232428_4857767	DDB_G0270432	1.50292	1.10657	-1.32521	-1.43851	-1.36604	1	0	0	0	0
DDB0232428	4862690	DDB0232428_4862690	DDB_G0269158	-2.37276	-2.07233	-0.357033	0.401682	-1.00898	-1	-1	0	0	-1
DDB0232428	4862726	DDB0232428_4862726	DDB_G0269158	-0.589753	-1.66468	-0.575035	-0.331259	-0.515393	0	-1	0	0	0
DDB0232428	4864880	DDB0232428_4864880	DDB_G0269158	0.108351	-2.00221	0.564629	-0.656793	-0.924078	0	-1	0	0	0
DDB0232429	57671	DDB0232429_57671	DDB_G0271142	0.589814	0.854572	-1.1903	-0.204698	0.96819	0	0	-1	0	0
DDB0232429	65020	DDB0232429_65020	DDB_G0271348	-1.99286	-1.72451	-1.58391	-0.524253	-0.587833	-1	-1	-1	0	0
DDB0232429	123256	DDB0232429_123256	DDB_G0271314	0.402164	0.610538	0.345683	0.270692	-1.07145	0	0	0	0	-1
DDB0232429	127559	DDB0232429_127559	DDB_G0271308	-2.4434	-2.13701	0.124852	0.750955	1.38374	-1	-1	0	0	0
DDB0232429	128366	DDB0232429_128366	DDB_G0271308	-1.17498	-2.02105	0.191425	0.951389	1.84624	-1	-1	0	0	1
DDB0232429	146425	DDB0232429_146425	DDB_G0271292	-0.329242	-1.30375	0.987154	1.51201	1.43615	0	0	0	1	0
DDB0232429	171895	DDB0232429_171895	DDB_G0271274	-0.689757	-2.26154	-0.133895	-0.540437	-0.926386	0	-1	0	0	0
DDB0232429	244125	DDB0232429_244125	DDB_G0271238	1.31049	0.828053	-0.301386	0.610725	2.60414	0	0	0	0	1
DDB0232429	263711	DDB0232429_263711	DDB_G0271226	-1.33854	-1.36026	1.49472	2.03003	2.42119	0	0	0	1	1
DDB0232429	294054	DDB0232429_294054	DDB_G0271204	0.419391	0.728227	0.170582	-1.28143	-0.574252	0	0	0	-1	0
DDB0232429	337160	DDB0232429_337160	DDB_G0271184	-1.0502	0.00922084	-0.545196	-0.281468	0.366186	-1	0	0	0	0
DDB0232429	354907	DDB0232429_354907	NA	0.986817	0.924143	0.10884	-1.31347	-0.496165	0	0	0	-1	0
DDB0232429	356236	DDB0232429_356236	DDB_G0271164	0.339489	-1.04102	-0.404559	-1.44189	-0.73379	0	-1	0	-1	0
DDB0232429	359246	DDB0232429_359246	DDB_G0271438	-0.602734	0.374553	-1.38223	-0.558394	-0.761537	0	0	-1	0	0
DDB0232429	488119	DDB0232429_488119	DDB_G0271608	-1.1161	0.152617	-2.26517	-0.197011	-0.546755	-1	0	-1	0	0
DDB0232429	567762	DDB0232429_567762	DDB_G0271626	-2.3104	-1.40588	0.548294	-0.453108	-0.939854	-1	-1	0	0	0
DDB0232429	607836	DDB0232429_607836	DDB_G0271544	0.450673	0.297398	-0.503547	-1.21375	-0.44262	0	0	0	-1	0
DDB0232429	661908	DDB0232429_661908	DDB_G0271654	-0.908404	-0.927592	-1.77924	-0.493413	-0.7846	0	0	-1	0	0
DDB0232429	673482	DDB0232429_673482	DDB_G0271504	0.692464	-0.933726	-3.50681	-1.15627	-0.369271	0	0	-1	-1	0
DDB0232429	686804	DDB0232429_686804	DDB_G0271660	1.07712	0.928445	0.126977	1.17124	2.60655	0	0	0	0	1
DDB0232429	696931	DDB0232429_696931	DDB_G0271590	-0.951948	-0.744921	0.489768	-1.4954	-0.802087	0	0	0	-1	0
DDB0232429	724479	DDB0232429_724479	DDB_G0271704	-1.85915	-1.6021	0.173934	1.04873	0.624811	-1	-1	0	0	0
DDB0232429	730481	DDB0232429_730481	DDB_G0271792	-1.37588	-0.0586317	1.30428	1.66178	-1.09016	0	0	0	1	0
DDB0232429	741428	DDB0232429_741428	DDB_G0271696	0.574243	0.214672	-0.338719	-1.52416	-0.395758	0	0	0	-1	0
DDB0232429	758715	DDB0232429_758715	DDB_G0271692	0.34798	0.770583	0.394905	-0.365305	-1.38527	0	0	0	0	-1
DDB0232429	759983	DDB0232429_759983	DDB_G0271692	0.571429	-0.446631	0.990497	-1.16188	-0.376428	0	0	0	-1	0
DDB0232429	760220	DDB0232429_760220	DDB_G0271692	-1.16871	0.00252205	0.390824	-0.172852	-0.57229	-1	0	0	0	0
DDB0232429	777108	DDB0232429_777108	DDB_G0271686	-0.167014	-1.59358	0.230977	-0.0176742	-0.429304	0	-1	0	0	0
DDB0232429	809493	DDB0232429_809493	DDB_G0271678	0.238712	0.154499	-0.403743	-1.00653	-0.0459071	0	0	0	-1	0
DDB0232429	956626	DDB0232429_956626	DDB_G0271850	0.67384	2.45087	0.294446	1.24638	0.214871	0	1	0	0	0
DDB0232429	1033115	DDB0232429_1033115	DDB_G0271888	0.438195	0.403458	-0.303014	0.172042	-1.18914	0	0	0	0	-1
DDB0232429	1085477	DDB0232429_1085477	NA	-0.460922	-1.65973	0.3209	0.286832	-0.509398	0	-1	0	0	0
DDB0232429	1089894	DDB0232429_1089894	DDB_G0271970	-2.39947	-1.14444	0.367941	0.701614	-1.0386	-1	-1	0	0	-1
DDB0232429	1160713	DDB0232429_1160713	DDB_G0272066	0.363204	-1.8114	0.54241	-1.40996	-0.0088811	0	-1	0	-1	0
DDB0232429	1165385	DDB0232429_1165385	DDB_G0272002	-0.983876	-1.63756	-0.855544	-1.27223	-0.879661	0	-1	0	-1	0
DDB0232429	1197632	DDB0232429_1197632	NA	0.44561	0.023175	0.0372184	-0.953688	-1.00156	0	0	0	0	-1
DDB0232429	1270910	DDB0232429_1270910	DDB_G0272316	0.225679	0.298514	-0.522403	-1.07506	-0.129277	0	0	0	-1	0
DDB0232429	1281568	DDB0232429_1281568	DDB_G0272108	1.34725	1.60716	0.446362	0.364428	-0.638352	0	1	0	0	0
DDB0232429	1331467	DDB0232429_1331467	DDB_G0272338	0.806501	1.13495	-1.86495	-0.546135	-0.601263	0	0	-1	0	0
DDB0232429	1369798	DDB0232429_1369798	DDB_G0272372	0.256453	0.0217548	0.206822	-1.43279	-0.722183	0	0	0	-1	0
DDB0232429	1379000	DDB0232429_1379000	DDB_G0272374	-0.738369	0.508673	-0.76019	-1.15924	-0.373056	0	0	0	-1	0
DDB0232429	1438743	DDB0232429_1438743	NA	0.0524821	0.423572	-1.38176	0.180642	-0.0322014	0	0	-1	0	0
DDB0232429	1447329	DDB0232429_1447329	NA	0.489424	0.423975	-2.46016	-0.943465	-0.653975	0	0	-1	0	0
DDB0232429	1457477	DDB0232429_1457477	DDB_G0272112	-2.03198	-0.670332	0.0688227	-1.36151	0.0831578	-1	0	0	-1	0
DDB0232429	1500745	DDB0232429_1500745	DDB_G0272416	1.57843	1.39386	0.125457	0.11174	-0.883235	1	0	0	0	0
DDB0232429	1527432	DDB0232429_1527432	DDB_G0272174	0.206779	-0.606587	-1.09177	-1.15508	-0.367747	0	0	-1	-1	0
DDB0232429	1545775	DDB0232429_1545775	DDB_G0272428	0.528754	-0.270525	-1.48031	-1.19135	0.653278	0	0	-1	-1	0
DDB0232429	1577280	DDB0232429_1577280	DDB_G0272282	-0.852226	-1.19445	-0.489611	1.02067	2.98274	0	-1	0	0	1
DDB0232429	1578684	DDB0232429_1578684	DDB_G0272282	-2.06444	-1.79005	-1.94066	0.541561	1.58492	-1	-1	-1	0	0
DDB0232429	1586997	DDB0232429_1586997	DDB_G0272158	-2.0763	-0.174679	-0.479135	-0.389819	0.157103	-1	0	0	0	0
DDB0232429	1587831	DDB0232429_1587831	DDB_G0272158	-2.02045	-1.74978	0.535193	-0.148013	-0.618426	-1	-1	0	0	0
DDB0232429	1634813	DDB0232429_1634813	DDB_G0272294	-1.40811	-0.758422	-0.689475	-0.0596399	-0.382445	-1	0	0	0	0
DDB0232429	1642818	DDB0232429_1642818	DDB_G0272456	-1.81396	-1.83138	0.967076	0.994123	1.63397	0	0	0	0	1
DDB0232429	1660773	DDB0232429_1660773	DDB_G0272206	0.724186	-1.65459	-0.658462	-1.26119	-0.503177	0	-1	0	-1	0
DDB0232429	1662744	DDB0232429_1662744	DDB_G0272206	-0.880721	-1.98278	0.338692	-0.385957	0.14749	0	-1	0	0	0
DDB0232429	1690787	DDB0232429_1690787	DDB_G0272218	0.550799	0.380447	0.355644	0.571629	-1.39008	0	0	0	0	-1
DDB0232429	1730255	DDB0232429_1730255	DDB_G0272242	0.967092	-1.16191	1.54101	1.07029	-0.819635	0	0	1	0	0
DDB0232429	1746422	DDB0232429_1746422	DDB_G0272474	-1.14594	-1.0232	-1.46218	0.524996	-0.218312	-1	-1	-1	0	0
DDB0232429	1746526	DDB0232429_1746526	DDB_G0272474	-1.97816	-1.71105	-1.00957	-0.192975	1.43655	-1	-1	-1	0	0
DDB0232429	1776331	DDB0232429_1776331	DDB_G0272492	-1.44741	-2.11066	0.689751	0.632184	0.109403	-1	-1	0	0	0
DDB0232429	1814420	DDB0232429_1814420	DDB_G0272546	-0.359006	1.02918	1.60466	1.79324	0.571398	0	0	1	1	0
DDB0232429	1821724	DDB0232429_1821724	DDB_G0272504	-1.95984	-1.69428	-1.64936	-1.29885	-0.55123	-1	-1	-1	-1	0
DDB0232429	1829135	DDB0232429_1829135	DDB_G0272532	-1.80034	-1.54825	-0.121416	-0.310267	0.0513014	-1	-1	0	0	0
DDB0232429	1837463	DDB0232429_1837463	DDB_G0272554	-1.96001	-1.69444	0.567503	-0.101178	1.90031	-1	-1	0	0	0
DDB0232429	1837678	DDB0232429_1837678	DDB_G0272554	0.64389	0.425092	0.756445	1.2788	3.5303	0	0	0	0	1
DDB0232429	1846549	DDB0232429_1846549	DDB_G0272522	0.985978	0.797611	0.597778	1.34055	1.59991	0	0	0	0	1
DDB0232429	1847868	DDB0232429_1847868	DDB_G0272522	-1.84549	-0.0309876	0.455453	1.12712	0.536483	-1	0	0	0	0
DDB0232429	1902590	DDB0232429_1902590	DDB_G0272714	0.636471	0.529926	-1.64524	-0.499921	-0.718082	0	0	-1	0	0
DDB0232429	1946310	DDB0232429_1946310	DDB_G0272670	0.510385	1.04289	0.863709	1.35548	3.34107	0	0	0	0	1
DDB0232429	2045838	DDB0232429_2045838	DDB_G0272674	1.36416	1.17792	1.82098	0.213482	-0.297982	0	0	1	0	0
DDB0232429	2046211	DDB0232429_2046211	DDB_G0272674	0.523103	0.327249	0.522301	-1.23947	-0.47545	0	0	0	-1	0
DDB0232429	2090179	DDB0232429_2090179	DDB_G0272999	-0.476747	-1.11784	0.980879	1.03115	1.65162	0	-1	0	0	0
DDB0232429	2210121	DDB0232429_2210121	DDB_G0349499	-0.896144	-0.617437	0.765779	-1.20835	0.208101	0	0	0	-1	0
DDB0232429	2222936	DDB0232429_2222936	DDB_G0272736	-1.80436	-0.496692	-1.15135	-0.204374	-0.37887	-1	0	-1	0	0
DDB0232429	3051513	DDB0232429_3051513	DDB_G0273583	1.61894	1.7369	0.668518	-1.26043	-0.351159	1	1	0	0	0
DDB0232429	3111058	DDB0232429_3111058	NA	-0.633161	-0.283492	-0.146926	-1.49212	-0.797899	0	0	0	-1	0
DDB0232429	3236731	DDB0232429_3236731	DDB_G0273651	0.451493	-0.889485	-1.11564	-1.43954	-0.730797	0	0	-1	-1	0
DDB0232429	3242592	DDB0232429_3242592	DDB_G0273657	-2.01119	-1.23427	-0.433469	-0.415134	-0.619585	-1	-1	0	0	0
DDB0232429	3298738	DDB0232429_3298738	DDB_G0273701	-0.445901	-1.55568	-0.222993	-1.16735	-0.38341	0	-1	0	-1	0
DDB0232429	3314360	DDB0232429_3314360	DDB_G0273717	-0.200359	-1.16247	-0.14642	-0.108431	0.170169	0	-1	0	0	0
DDB0232429	3429521	DDB0232429_3429521	DDB_G0273807	-0.404436	-1.33751	-0.0577428	-0.478566	-0.81771	0	-1	0	0	0
DDB0232429	3440281	DDB0232429_3440281	DDB_G0273813	-0.088238	0.180584	-0.474718	-0.396132	-1.29765	0	0	0	0	-1
DDB0232429	3465429	DDB0232429_3465429	DDB_G0273835	1.58559	0.407691	0.551682	2.3759	0.0483796	1	0	0	1	0
DDB0232429	3465954	DDB0232429_3465954	DDB_G0273835	-0.937257	-1.75742	0.0915861	-0.163179	-0.627679	0	-1	0	0	0
DDB0232429	3478165	DDB0232429_3478165	DDB_G0273841	-0.138503	-1.23883	0.265962	-0.349994	-0.559451	0	-1	0	0	0
DDB0232429	3490957	DDB0232429_3490957	DDB_G0273857	2.01736	2.14596	1.81099	3.51461	3.97159	0	0	0	1	1
DDB0232429	3504006	DDB0232429_3504006	DDB_G0273871	1.68037	1.13606	1.75028	1.98717	3.91718	1	0	1	1	1
DDB0232429	3518715	DDB0232429_3518715	NA	0.78332	0.82997	-0.0824506	-1.23561	1.17792	0	0	0	-1	0
DDB0232429	3518732	DDB0232429_3518732	NA	-0.798138	-0.369412	-1.75368	-1.17235	-0.389789	0	0	-1	-1	0
DDB0232429	3571948	DDB0232429_3571948	DDB_G0273935	1.07052	1.18675	1.02363	0.616649	2.18886	0	0	0	0	1
DDB0232429	3574681	DDB0232429_3574681	DDB_G0273939	0.905545	1.23331	-0.129028	-0.447082	2.73096	0	0	0	0	1
DDB0232429	3581480	DDB0232429_3581480	DDB_G0273945	-1.00827	-1.01848	0.374718	-0.214539	-0.535353	-1	-1	0	0	0
DDB0232429	3587042	DDB0232429_3587042	DDB_G0273949	1.72216	1.30292	1.50396	2.0009	4.69391	1	0	1	1	1
DDB0232429	3649339	DDB0232429_3649339	DDB_G0273997	-0.557899	-1.93787	-0.583626	-1.52995	-0.846178	0	-1	0	-1	0
DDB0232429	3651159	DDB0232429_3651159	DDB_G0273999	-0.161175	0.552926	-0.726336	-1.26115	-0.503115	0	0	0	-1	0
DDB0232429	3672782	DDB0232429_3672782	DDB_G0274019	-0.117779	-0.532059	3.53176	2.66696	2.35505	0	0	1	1	1
DDB0232429	3687752	DDB0232429_3687752	DDB_G0274031	0.959221	1.21787	0.349267	-1.1252	-0.415194	0	0	0	-1	0
DDB0232429	3748503	DDB0232429_3748503	DDB_G0274079	-0.96303	-1.11893	-0.788989	0.0303805	-0.804891	0	-1	0	0	0
DDB0232429	3764560	DDB0232429_3764560	NA	1.27479	1.50788	-0.00416523	-0.749297	0.287178	0	1	0	0	0
DDB0232429	3801274	DDB0232429_3801274	DDB_G0274773	-2.07594	-1.13374	-0.94379	-0.666368	-0.679943	-1	-1	0	0	0
DDB0232429	3801896	DDB0232429_3801896	DDB_G0274773	0.705159	-0.604582	-2.05873	-0.200278	-0.186071	0	0	-1	0	0
DDB0232429	3847636	DDB0232429_3847636	DDB_G0274789	-1.90626	-1.64523	-0.197033	-0.0314779	-0.491839	-1	-1	0	0	0
DDB0232429	3879725	DDB0232429_3879725	DDB_G0274579	-1.26329	-0.179256	0.657688	1.53129	0.00148796	0	0	0	1	0
DDB0232429	3882454	DDB0232429_3882454	DDB_G0274797	-0.891223	-0.916977	2.08709	1.816	-0.538102	0	0	1	0	0
DDB0232429	3894327	DDB0232429_3894327	DDB_G0274577	-0.289726	-1.17476	1.45105	1.21019	0.99077	0	-1	0	0	0
DDB0232429	3895130	DDB0232429_3895130	DDB_G0274577	-0.797622	-1.54997	1.75406	1.72104	1.85642	0	-1	1	1	0
DDB0232429	3896724	DDB0232429_3896724	DDB_G0274577	-1.97292	-1.70626	1.54184	1.94299	1.59122	-1	-1	1	1	0
DDB0232429	3901181	DDB0232429_3901181	DDB_G0274341	0.670899	1.09224	-0.11087	-1.22089	-0.904796	0	0	0	-1	0
DDB0232429	3970163	DDB0232429_3970163	DDB_G0274811	-1.11785	-0.664083	-3.01644	-1.28667	0.0399127	-1	0	-1	-1	0
DDB0232429	3971260	DDB0232429_3971260	DDB_G0274813	-0.788565	-0.719661	-0.0738726	-1.21028	-0.438199	0	0	0	-1	0
DDB0232429	4030615	DDB0232429_4030615	DDB_G0274731	-1.9397	-1.67585	0.38618	0.767418	-0.52891	-1	-1	0	0	0
DDB0232429	4038443	DDB0232429_4038443	DDB_G0274279	0.494918	-0.2736	-3.30046	-2.11504	-1.15259	0	0	-1	-1	-1
DDB0232429	4084152	DDB0232429_4084152	NA	-1.25469	-0.542567	-0.490464	0.0319575	-0.817719	-1	0	0	0	0
DDB0232429	4147388	DDB0232429_4147388	DDB_G0274247	-2.04751	-1.77455	0.0306479	-1.375	-0.648425	-1	-1	0	-1	0
DDB0232429	4157354	DDB0232429_4157354	DDB_G0274119	-1.0874	-0.805482	-0.563413	-1.47241	-0.77275	-1	0	0	-1	0
DDB0232429	4218838	DDB0232429_4218838	DDB_G0274245	0.00383943	0.288732	0.305759	0.480486	-1.15423	0	0	0	0	-1
DDB0232429	4328319	DDB0232429_4328319	DDB_G0274879	-0.915594	-1.72949	0.23814	-0.160758	-0.187199	0	-1	0	0	0
DDB0232429	4335129	DDB0232429_4335129	DDB_G0274881	-0.146322	-0.547549	-3.57634	-1.1918	-0.414612	0	0	-1	-1	0
DDB0232429	4340499	DDB0232429_4340499	DDB_G0274675	-0.896283	-1.21048	-0.0443991	1.06021	0.0462497	0	-1	0	0	0
DDB0232429	4387868	DDB0232429_4387868	DDB_G0274495	0.201693	0.0313961	-1.89119	-1.24691	-0.484945	0	0	-1	-1	0
DDB0232429	4387871	DDB0232429_4387871	DDB_G0274495	0.337888	-0.618114	-0.094939	-1.4838	-0.320516	0	0	0	-1	0
DDB0232429	4408978	DDB0232429_4408978	DDB_G0274663	-0.275199	-0.640648	-1.32823	-1.51198	-0.823255	0	0	-1	-1	0
DDB0232429	4423715	DDB0232429_4423715	DDB_G0274483	-0.0908254	-1.57128	0.594564	0.575393	-0.680682	0	-1	0	0	0
DDB0232429	4426010	DDB0232429_4426010	DDB_G0274483	-0.758985	-2.34078	-0.127372	-0.583976	-0.482734	0	-1	0	0	0
DDB0232429	4456972	DDB0232429_4456972	NA	-0.148997	0.642819	-1.15113	-1.7363	-0.758187	0	0	-1	-1	0
DDB0232429	4480056	DDB0232429_4480056	DDB_G0274655	-0.980261	-1.02558	1.00439	0.00171277	-0.406209	0	-1	0	0	0
DDB0232429	4499125	DDB0232429_4499125	DDB_G0274649	-1.99224	-1.07802	0.124402	0.70347	1.13808	-1	-1	0	0	0
DDB0232429	4515717	DDB0232429_4515717	DDB_G0274923	0.33665	0.390736	0.651584	1.15964	1.98491	0	0	0	0	1
DDB0232429	4532165	DDB0232429_4532165	DDB_G0274643	1.74829	1.92003	1.04867	0.173977	-0.590481	1	1	0	0	0
DDB0232429	4540292	DDB0232429_4540292	DDB_G0274455	0.550943	-0.782013	-0.749952	-1.37623	0.121497	0	0	0	-1	0
DDB0232429	4546432	DDB0232429_4546432	DDB_G0274931	0.0285298	0.840628	-1.53847	-1.16553	0.411221	0	0	-1	-1	0
DDB0232429	4558823	DDB0232429_4558823	DDB_G0274939	-1.81414	-0.344598	0.87342	-1.17229	-0.389716	-1	0	0	-1	0
DDB0232429	4564901	DDB0232429_4564901	DDB_G0274101	0.371846	0.501579	0.498153	1.33633	2.8779	0	0	0	0	1
DDB0232429	4567920	DDB0232429_4567920	DDB_G0274101	-1.663	-0.157316	-0.137447	0.90279	1.57754	0	0	0	0	1
DDB0232429	4592344	DDB0232429_4592344	DDB_G0274945	-0.841866	-0.822402	-1.86164	-1.26258	-0.504943	0	0	-1	-1	0
DDB0232429	4649492	DDB0232429_4649492	DDB_G0274409	-1.57409	-1.59369	1.69738	1.53372	-1.26134	0	0	1	1	0
DDB0232429	4693338	DDB0232429_4693338	DDB_G0274395	-0.624093	-1.15171	-0.178538	-0.297095	-0.66961	0	-1	0	0	0
DDB0232429	4730165	DDB0232429_4730165	DDB_G0274623	-1.98416	-0.621236	-0.0914596	-0.307597	-0.578197	-1	0	0	0	0
DDB0232429	4745902	DDB0232429_4745902	DDB_G0274221	-0.551712	0.416648	-1.54292	0.632776	0.088491	0	0	-1	0	0
DDB0232429	4757942	DDB0232429_4757942	DDB_G0274217	-1.10855	-0.1483	-2.5623	-1.43215	-0.721366	-1	0	-1	-1	0
DDB0232429	4769090	DDB0232429_4769090	DDB_G0274211	0.213204	-0.57169	-3.64969	-1.22927	-0.462437	0	0	-1	-1	0
DDB0232429	4776854	DDB0232429_4776854	DDB_G0274393	0.17823	-0.37511	-1.88295	0.929849	-0.563089	0	0	-1	0	0
DDB0232429	4831614	DDB0232429_4831614	DDB_G0274181	0.254197	0.13811	-0.509382	-1.28613	-0.535002	0	0	0	-1	0
DDB0232429	4836173	DDB0232429_4836173	DDB_G0274177	-0.575419	-0.597256	0.541744	1.69202	-1.51911	0	0	0	1	0
DDB0232429	4860782	DDB0232429_4860782	DDB_G0274617	0.011797	-1.74376	-2.09456	-1.34579	-0.611142	0	-1	-1	-1	0
DDB0232429	4877082	DDB0232429_4877082	DDB_G0274385	1.87031	2.21187	1.98852	0.290865	0.525117	0	1	1	0	0
DDB0232429	4923359	DDB0232429_4923359	DDB_G0274609	-1.83956	-0.0971867	-1.75734	0.872755	0.196262	-1	0	-1	0	0
DDB0232429	4981223	DDB0232429_4981223	DDB_G0305463	0.475885	0.289663	0.0658276	-1.47302	-0.818766	0	0	0	-1	0
DDB0232429	4989629	DDB0232429_4989629	NA	-2.23074	-0.737476	-1.62431	-0.421158	-0.851542	-1	0	-1	0	0
DDB0232429	4994639	DDB0232429_4994639	DDB_G0294855	-2.1035	-0.71049	-0.777345	-0.233424	-0.710489	-1	0	0	0	0
DDB0232429	5002807	DDB0232429_5002807	DDB_G0275123	0.730021	0.657458	-0.283994	-1.21213	0.0725362	0	0	0	-1	0
DDB0232429	5005887	DDB0232429_5005887	DDB_G0275119	-1.88878	-1.62922	-0.609489	0.968683	0.48522	-1	-1	0	0	0
DDB0232429	5020456	DDB0232429_5020456	NA	1.50311	1.54776	0.754431	-0.740274	-1.51608	1	1	0	0	0
DDB0232429	5031817	DDB0232429_5031817	DDB_G0275253	0.0851408	-0.403478	-0.702285	-1.52789	-0.143436	0	0	0	-1	0
DDB0232429	5063864	DDB0232429_5063864	DDB_G0275099	0.198007	0.755272	-1.10428	-1.30963	-0.564996	0	0	-1	-1	0
DDB0232429	5073834	DDB0232429_5073834	DDB_G0275171	0.0582269	0.309059	-0.231555	-1.6083	-0.946184	0	0	0	-1	0
DDB0232429	5119380	DDB0232429_5119380	DDB_G0275071	-1.9349	-1.67145	0.313113	1.2815	2.37802	-1	-1	0	0	1
DDB0232429	5190518	DDB0232429_5190518	DDB_G0275013	0.473967	0.531626	-1.57684	-0.282995	0.48977	0	0	-1	0	0
DDB0232429	5217861	DDB0232429_5217861	DDB_G0275157	0.914045	-0.313563	1.51679	1.86084	3.14517	0	0	1	1	1
DDB0232429	5253432	DDB0232429_5253432	DDB_G0275295	0.878077	0.921308	0.355996	0.756677	-1.18187	0	0	0	0	-1
DDB0232429	5274650	DDB0232429_5274650	DDB_G0275041	-0.931406	-0.976042	-2.04197	-0.0257464	-0.462719	0	0	-1	0	0
DDB0232429	5319412	DDB0232429_5319412	DDB_G0275307	-0.932518	-1.59185	0.125608	-0.402934	-0.0758435	0	-1	0	0	0
DDB0232429	5319706	DDB0232429_5319706	DDB_G0275307	-0.811439	-1.58676	-1.08306	-1.19684	-0.421045	0	-1	-1	-1	0
DDB0232429	5328159	DDB0232429_5328159	DDB_G0275181	0.516706	0.572484	1.61269	2.10391	1.89768	0	0	1	1	1
DDB0232429	5380952	DDB0232429_5380952	DDB_G0275399	0.0182204	-1.73608	0.462795	1.00238	0.229577	0	-1	0	0	0
DDB0232429	5416603	DDB0232429_5416603	NA	0.125077	-0.56178	-0.348848	-1.34138	-0.605511	0	0	0	-1	0
DDB0232429	5456183	DDB0232429_5456183	DDB_G0275419	0.529715	0.483524	-0.339455	-0.587421	-1.08233	0	0	0	0	-1
DDB0232429	5495254	DDB0232429_5495254	DDB_G0275391	-1.32795	-1.98051	1.07308	0.800358	-0.129934	-1	-1	0	0	0
DDB0232429	5525048	DDB0232429_5525048	DDB_G0275571	0.212427	-1.54376	0.00854973	-0.155412	-0.368984	0	-1	0	0	0
DDB0232429	5538608	DDB0232429_5538608	DDB_G0275579	-0.172458	-1.17314	-0.195016	-0.258266	-0.933172	0	-1	0	0	0
DDB0232429	5558995	DDB0232429_5558995	NA	-0.372848	-0.76198	-1.32669	-0.0425853	0.270101	0	0	-1	0	0
DDB0232429	5563731	DDB0232429_5563731	DDB_G0275591	-0.928358	-0.494665	-0.753972	-1.19639	-0.420468	0	0	0	-1	0
DDB0232429	5608267	DDB0232429_5608267	DDB_G0275613	0.240617	0.116011	-0.631197	-1.19478	-0.418408	0	0	0	-1	0
DDB0232429	5625762	DDB0232429_5625762	DDB_G0275561	0.0332183	-1.17041	0.28731	-0.670162	0.0235287	0	-1	0	0	0
DDB0232429	5705117	DDB0232429_5705117	NA	-0.733472	-0.506548	0.000552577	-1.0833	-0.549533	0	0	0	-1	0
DDB0232429	5755201	DDB0232429_5755201	DDB_G0275687	-0.405016	-1.60724	-0.235046	-0.40319	0.240598	0	-1	0	0	0
DDB0232429	5759285	DDB0232429_5759285	DDB_G0275687	1.86478	2.24281	0.421672	-0.379572	-0.334687	1	1	0	0	0
DDB0232429	5843349	DDB0232429_5843349	DDB_G0275653	-0.764908	-1.78666	-0.672012	0.0660191	0.981868	0	-1	0	0	0
DDB0232429	5880177	DDB0232429_5880177	DDB_G0275745	-1.82037	0.0258538	-1.04945	-0.193094	0.218536	-1	0	-1	0	0
DDB0232429	5917196	DDB0232429_5917196	DDB_G0275733	0.607881	0.234337	1.44842	2.00592	1.00392	0	0	0	1	0
DDB0232429	5917468	DDB0232429_5917468	DDB_G0275733	-1.21675	-0.568596	1.25605	1.90835	0.998191	0	0	0	1	0
DDB0232429	6028637	DDB0232429_6028637	DDB_G0275911	0.764358	0.868867	-0.228276	-1.22382	-0.825924	0	0	0	-1	0
DDB0232429	6037504	DDB0232429_6037504	DDB_G0275917	0.0775827	-1.72285	0.154749	-0.026248	0.191374	0	-1	0	0	0
DDB0232429	6209418	DDB0232429_6209418	DDB_G0275955	-0.314586	0.673267	0.0809069	-1.28561	1.00902	0	0	0	-1	0
DDB0232429	6284381	DDB0232429_6284381	DDB_G0276155	-2.11144	-1.83308	0.59762	-1.28809	-0.719293	-1	-1	0	-1	0
DDB0232429	6286620	DDB0232429_6286620	DDB_G0276155	-0.118337	-1.27428	0.527095	1.98526	2.15236	0	0	0	1	1
DDB0232429	6314962	DDB0232429_6314962	DDB_G0276027	1.52468	2.37156	1.34974	0.30848	1.22998	1	1	0	0	0
DDB0232429	6315190	DDB0232429_6315190	DDB_G0276027	1.26421	1.60531	0.954034	0.291203	0.866913	0	1	0	0	0
DDB0232429	6392258	DDB0232429_6392258	DDB_G0276151	-0.631191	0.547547	-1.28439	-0.3139	0.144381	0	0	-1	0	0
DDB0232429	6449707	DDB0232429_6449707	DDB_G0276067	-1.27095	-0.778942	-0.227976	1.62431	-0.30885	0	0	0	1	0
DDB0232429	6454609	DDB0232429_6454609	DDB_G0276245	-1.23242	-0.678621	0.226912	0.936754	1.90165	-1	0	0	0	0
DDB0232429	6484506	DDB0232429_6484506	DDB_G0276051	-0.816059	-1.70104	-0.619904	-0.281672	-0.0718434	0	-1	0	0	0
DDB0232429	6496497	DDB0232429_6496497	DDB_G0276045	0.00609714	-1.88804	0.651857	0.0103508	-1.09162	0	-1	0	0	-1
DDB0232429	6502868	DDB0232429_6502868	DDB_G0276251	-1.86709	-1.60936	-2.09664	-1.21828	-0.448411	-1	-1	-1	-1	0
DDB0232429	6579894	DDB0232429_6579894	DDB_G0276299	-2.10658	-1.82863	-1.7126	-0.513473	0.669014	-1	-1	-1	0	0
DDB0232429	6598658	DDB0232429_6598658	DDB_G0276309	0.07176	-0.740651	0.278097	-0.434067	-1.06043	0	0	0	0	-1
DDB0232429	6626359	DDB0232429_6626359	NA	-1.43689	-1.64948	0.381792	0.920613	-0.578843	-1	-1	0	0	0
DDB0232429	6722508	DDB0232429_6722508	DDB_G0276381	0.39793	1.40251	1.54789	1.11254	0.151619	0	0	1	0	0
DDB0232429	6741573	DDB0232429_6741573	DDB_G0276383	-1.1958	-2.04297	-0.269996	-0.35576	-0.0751435	-1	-1	0	0	0
DDB0232429	6762398	DDB0232429_6762398	DDB_G0276367	-1.23602	-1.4065	-0.0680824	-1.56695	-0.893411	-1	-1	0	-1	0
DDB0232429	6785514	DDB0232429_6785514	DDB_G0276529	-0.620602	-0.94763	-0.510406	-1.37459	-0.177559	0	0	0	-1	0
DDB0232429	6835030	DDB0232429_6835030	DDB_G0276409	0.679358	-0.559882	-1.42616	-0.201069	0.0227532	0	0	-1	0	0
DDB0232429	6902617	DDB0232429_6902617	DDB_G0276559	0.539589	-0.670557	0.960274	0.766037	2.2948	0	0	0	0	1
DDB0232429	6920015	DDB0232429_6920015	DDB_G0276435	0.661384	0.0955603	1.36755	1.10487	2.63997	0	0	0	0	1
DDB0232429	6932956	DDB0232429_6932956	DDB_G0276429	0.0869157	-1.86369	-2.72682	-0.822228	-0.756349	0	-1	-1	0	0
DDB0232429	6933213	DDB0232429_6933213	DDB_G0276429	0.310885	0.600765	-1.25424	-0.744901	-0.373648	0	0	-1	0	0
DDB0232429	6933658	DDB0232429_6933658	DDB_G0276429	-1.05491	-0.860602	-0.629362	-1.27505	0.0473468	-1	0	0	-1	0
DDB0232429	6955511	DDB0232429_6955511	DDB_G0276439	0.51764	-0.512649	0.0615109	-1.23106	-0.464722	0	0	0	-1	0
DDB0232429	6959605	DDB0232429_6959605	DDB_G0276569	-1.82656	-1.57225	0.381772	-1.18308	-0.403478	-1	-1	0	-1	0
DDB0232429	6999176	DDB0232429_6999176	NA	-1.96427	-0.798858	0.243614	-0.478554	-0.556146	-1	0	0	0	0
DDB0232429	7010466	DDB0232429_7010466	DDB_G0276519	-1.19314	-1.90814	0.746006	0.465891	0.323544	-1	-1	0	0	0
DDB0232429	7031645	DDB0232429_7031645	NA	0.310338	0.30338	0.198261	0.787888	-1.34126	0	0	0	0	-1
DDB0232429	7049432	DDB0232429_7049432	DDB_G0276617	-0.902972	-0.00794831	-0.791709	-1.40172	-0.0997149	0	0	0	-1	0
DDB0232429	7051428	DDB0232429_7051428	DDB_G0276623	0.763126	0.432462	0.119093	-0.791188	-1.34742	0	0	0	0	-1
DDB0232429	7077056	DDB0232429_7077056	NA	0.510314	0.753236	-1.97419	-1.17761	0.183926	0	0	-1	-1	0
DDB0232429	7082573	DDB0232429_7082573	DDB_G0276657	1.20788	-0.23656	-0.1331	1.68543	2.76284	0	0	0	0	1
DDB0232429	7123078	DDB0232429_7123078	NA	0.642694	0.761874	-0.310058	-0.939129	-1.19753	0	0	0	0	-1
DDB0232429	7127211	DDB0232429_7127211	DDB_G0276687	0.198419	-0.331854	-0.102657	-1.31305	-0.569361	0	0	0	-1	0
DDB0232429	7163541	DDB0232429_7163541	DDB_G0276735	-0.19841	0.919787	-1.38891	-0.359882	-0.0991915	0	0	-1	0	0
DDB0232429	7282111	DDB0232429_7282111	DDB_G0277031	0.683168	0.601837	-0.129731	-0.532946	-1.28063	0	0	0	0	-1
DDB0232429	7288768	DDB0232429_7288768	DDB_G0276779	0.463999	0.381413	-1.27599	-1.33742	-0.60046	0	0	-1	-1	0
DDB0232429	7342134	DDB0232429_7342134	DDB_G0276797	0.584366	0.390691	-1.76042	0.832782	0.760024	0	0	-1	0	0
DDB0232429	7359257	DDB0232429_7359257	DDB_G0277051	0.403223	0.192734	-0.39432	-1.34994	0.253139	0	0	0	-1	0
DDB0232429	7402886	DDB0232429_7402886	DDB_G0276823	1.35498	1.77826	0.731276	0.743441	-0.567911	0	1	0	0	0
DDB0232429	7405924	DDB0232429_7405924	DDB_G0348941	-1.17948	0.0295443	-0.389427	0.301021	-0.806238	-1	0	0	0	0
DDB0232429	7414022	DDB0232429_7414022	DDB_G0276829	1.35496	1.773	0.135149	0.0480334	-0.20704	0	1	0	0	0
DDB0232429	7415097	DDB0232429_7415097	DDB_G0276829	2.23237	2.35273	-0.526917	-0.17558	0.0589376	0	1	0	0	0
DDB0232429	7416105	DDB0232429_7416105	DDB_G0276829	1.79524	2.25646	1.10821	0.430202	0.0768736	1	1	0	0	0
DDB0232429	7466714	DDB0232429_7466714	DDB_G0277077	1.69367	1.06532	1.41692	-0.658719	-0.486192	1	0	0	0	0
DDB0232429	7497501	DDB0232429_7497501	DDB_G0277095	-0.492965	0.746431	0.259551	1.14025	3.01841	0	0	0	0	1
DDB0232429	7537509	DDB0232429_7537509	DDB_G0276869	-1.06173	-0.147245	-0.210921	-0.0620056	-0.557646	-1	0	0	0	0
DDB0232429	7553063	DDB0232429_7553063	NA	-1.86932	-0.73924	0.350452	0.139544	1.15131	-1	0	0	0	0
DDB0232429	7573888	DDB0232429_7573888	DDB_G0276949	1.18625	1.59688	-0.127343	-1.00388	-0.87564	0	1	0	0	0
DDB0232429	7644334	DDB0232429_7644334	DDB_G0277145	-1.03489	0.101977	0.333915	0.902518	1.42103	-1	0	0	0	0
DDB0232429	7738488	DDB0232429_7738488	NA	0.404213	0.42884	0.53392	-1.04017	0.356232	0	0	0	-1	0
DDB0232429	7794568	DDB0232429_7794568	DDB_G0277291	-1.17104	-0.676085	0.337368	-0.379032	-0.653042	-1	0	0	0	0
DDB0232429	7800554	DDB0232429_7800554	DDB_G0277245	-1.25252	-1.80173	0.0522022	-0.472917	0.339897	-1	-1	0	0	0
DDB0232429	7801157	DDB0232429_7801157	DDB_G0277245	0.593436	0.220264	0.240903	-1.32505	-0.58468	0	0	0	-1	0
DDB0232429	7816040	DDB0232429_7816040	DDB_G0277247	-0.013122	1.82668	-0.142361	0.713757	-0.353772	0	1	0	0	0
DDB0232429	7897480	DDB0232429_7897480	NA	-0.0309776	0.416067	0.0513895	-0.425453	-1.00487	0	0	0	0	-1
DDB0232429	7903431	DDB0232429_7903431	DDB_G0277141	0.368977	-1.41022	0.251247	0.868122	0.792072	0	-1	0	0	0
DDB0232429	7931970	DDB0232429_7931970	DDB_G0277389	0.311365	0.0814432	-0.303354	0.218459	-1.15702	0	0	0	0	-1
DDB0232429	8006064	DDB0232429_8006064	DDB_G0277495	1.55521	0.202698	0.972299	0.170629	-0.971176	1	0	0	0	0
DDB0232429	8011924	DDB0232429_8011924	DDB_G0277539	0.616113	1.04373	2.17074	2.57158	1.6964	0	0	1	1	1
DDB0232429	8027358	DDB0232429_8027358	NA	-1.31596	-0.621918	-1.52144	-1.21352	-0.442328	-1	0	-1	-1	0
DDB0232429	8052002	DDB0232429_8052002	DDB_G0277421	-1.97382	-2.56132	0.296107	0.766341	0.678942	-1	-1	0	0	0
DDB0232429	8053064	DDB0232429_8053064	DDB_G0277419	-0.579917	-1.79728	-2.07911	-1.39656	-0.67594	0	-1	-1	-1	0
DDB0232429	8112147	DDB0232429_8112147	NA	1.50509	0.4571	1.0606	0.144044	-0.409536	1	0	0	0	0
DDB0232429	8147959	DDB0232429_8147959	DDB_G0277475	0.322733	0.840494	0.280678	-1.35565	-0.623731	0	0	0	-1	0
DDB0232429	8173828	DDB0232429_8173828	NA	0.356085	0.139796	4.4296	2.92629	2.45812	0	0	1	1	1
DDB0232429	8179595	DDB0232429_8179595	NA	-0.793396	-1.81331	-2.79494	-1.41177	-0.695357	0	-1	-1	-1	0
DDB0232429	8273990	DDB0232429_8273990	DDB_G0277581	0.987478	-0.80358	1.74371	1.71344	-0.49673	0	0	1	1	0
DDB0232429	8321197	DDB0232429_8321197	DDB_G0277687	1.01891	0.440406	0.302139	-1.33192	-0.593447	0	0	0	-1	0
DDB0232429	8336363	DDB0232429_8336363	DDB_G0277685	-0.964026	0.599614	0.336307	-1.50202	-0.855783	0	0	0	-1	0
DDB0232429	8357236	DDB0232429_8357236	NA	1.87235	1.45727	0.861281	-0.439878	-0.706227	1	0	0	0	0
DDB0232429	8415987	DDB0232429_8415987	DDB_G0277795	-1.08107	-0.832239	-0.593739	-1.4684	-0.767627	-1	0	0	-1	0
DDB0232429	8450492	DDB0232429_8450492	DDB_G0277815	-0.045928	-1.65776	-3.71804	-1.2642	-0.507008	0	-1	-1	-1	0
DDB0232429	8468486	DDB0232429_8468486	DDB_G0277777	0.860556	-1.13573	0.830241	0.0709689	0.583768	0	-1	0	0	0
DDB0232429	8474792	DDB0232429_8474792	NA	-2.68491	-2.35813	-0.137198	0.408236	-0.0153843	-1	-1	0	0	0
DDB0232430	5060	DDB0232430_5060	NA	0.134731	-0.0087497	0.15561	-1.16385	0.849243	0	0	0	-1	0
DDB0232430	5875	DDB0232430_5875	NA	-0.0872272	0.0647158	-0.346187	-1.47679	-0.778342	0	0	0	-1	0
DDB0232430	6832	DDB0232430_6832	NA	0.0604665	-1.5885	-1.74241	0.55523	0.159654	0	-1	-1	0	0
DDB0232430	8412	DDB0232430_8412	NA	-1.07846	-0.655661	-3.94732	-1.38134	-0.656518	-1	0	-1	-1	0
DDB0232430	9268	DDB0232430_9268	NA	1.25279	1.3115	2.71286	2.76272	5.68261	0	0	1	1	1
DDB0232430	61840	DDB0232430_61840	NA	-0.540268	-1.68728	0.53881	0.0300449	0.387883	0	-1	0	0	0
DDB0232430	66908	DDB0232430_66908	DDB_G0277961	-0.368221	0.125744	0.73498	-0.0610531	2.72205	0	0	0	0	1
DDB0232430	67393	DDB0232430_67393	DDB_G0277961	-2.91	-4.31409	-0.725916	0.270403	0.814303	-1	-1	0	0	0
DDB0232430	83761	DDB0232430_83761	DDB_G0277973	0.363751	-0.672286	0.197105	-1.40242	-0.683415	0	0	0	-1	0
DDB0232430	115522	DDB0232430_115522	DDB_G0277987	-1.17189	0.308308	0.154668	0.508218	-0.195236	-1	0	0	0	0
DDB0232430	130003	DDB0232430_130003	DDB_G0277997	0.508064	-0.15405	-1.97502	0.532441	-0.211404	0	0	-1	0	0
DDB0232430	178641	DDB0232430_178641	DDB_G0278031	-1.11332	-0.784452	0.0530378	-0.0365336	0.0471482	-1	0	0	0	0
DDB0232430	178813	DDB0232430_178813	DDB_G0278031	1.19471	1.91839	1.1477	-0.10135	-0.253103	0	1	0	0	0
DDB0232430	209310	DDB0232430_209310	DDB_G0278059	-1.12334	-1.07358	-3.86522	-0.496314	-0.602981	-1	-1	-1	0	0
DDB0232430	228073	DDB0232430_228073	DDB_G0278071	0.552975	0.268947	-0.064805	-1.69116	-0.0770012	0	0	0	-1	0
DDB0232430	234423	DDB0232430_234423	DDB_G0278075	0.0273046	0.137357	0.40615	-0.136613	-1.08195	0	0	0	0	-1
DDB0232430	239977	DDB0232430_239977	DDB_G0278593	1.85206	1.37538	0.554268	0.177381	0.539902	1	0	0	0	0
DDB0232430	242328	DDB0232430_242328	DDB_G0278593	0.300246	0.483966	0.151092	-1.42832	-0.802061	0	0	0	-1	0
DDB0232430	271050	DDB0232430_271050	DDB_G0278099	0.0882435	-0.956337	-1.8544	-1.49462	-0.80109	0	0	-1	-1	0
DDB0232430	329338	DDB0232430_329338	DDB_G0278125	0.171151	0.688983	0.595139	-1.24857	0.00980896	0	0	0	-1	0
DDB0232430	339304	DDB0232430_339304	DDB_G0278133	0.216629	-0.0818414	-1.00075	-0.227465	-0.686719	0	0	-1	0	0
DDB0232430	341606	DDB0232430_341606	DDB_G0278137	-0.470584	-0.682415	0.387829	-1.39646	-0.675811	0	0	0	-1	0
DDB0232430	350531	DDB0232430_350531	DDB_G0278143	0.922053	1.58687	0.586205	-0.0483515	-0.285357	0	1	0	0	0
DDB0232430	351342	DDB0232430_351342	DDB_G0278143	2.01049	2.23246	0.556967	-0.12433	-0.753526	1	1	0	0	0
DDB0232430	352473	DDB0232430_352473	DDB_G0278143	1.90484	2.24304	0.617262	-0.115612	-0.719917	1	1	0	0	0
DDB0232430	384952	DDB0232430_384952	DDB_G0278161	-1.28852	-1.31069	1.74362	2.1852	2.18751	0	0	1	1	1
DDB0232430	392415	DDB0232430_392415	NA	0.332291	0.722879	-0.0241858	-1.11673	-0.404389	0	0	0	-1	0
DDB0232430	444628	DDB0232430_444628	DDB_G0278193	-1.9993	-1.73041	-0.0411085	-0.43103	-0.594982	-1	-1	0	0	0
DDB0232430	459555	DDB0232430_459555	DDB_G0278629	0.527828	0.939601	-0.470885	-1.16565	0.108224	0	0	0	-1	0
DDB0232430	490886	DDB0232430_490886	NA	-1.07248	-0.703936	-1.93472	0.449433	-0.883783	-1	0	-1	0	0
DDB0232430	491081	DDB0232430_491081	DDB_G0278217	0.7905	0.738526	1.25298	1.39825	1.94441	0	0	0	0	1
DDB0232430	495879	DDB0232430_495879	NA	0.301667	0.576464	0.810169	1.54259	2.0379	0	0	0	1	1
DDB0232430	530303	DDB0232430_530303	DDB_G0277845	-0.0918964	-0.749708	-0.116195	-1.29988	0.0711758	0	0	0	-1	0
DDB0232430	545376	DDB0232430_545376	DDB_G0278243	0.350462	0.596173	0.0609223	0.415181	-1.60994	0	0	0	0	-1
DDB0232430	618917	DDB0232430_618917	DDB_G0278285	-1.00659	-1.60865	-2.35645	-1.2176	-0.447545	-1	-1	-1	-1	0
DDB0232430	673403	DDB0232430_673403	DDB_G0278655	-0.820156	-1.57871	-2.27468	-1.1892	0.236711	0	-1	-1	-1	0
DDB0232430	681938	DDB0232430_681938	DDB_G0278657	0.183262	1.5502	1.12013	0.0666123	-0.664541	0	1	0	0	0
DDB0232430	682095	DDB0232430_682095	DDB_G0278657	1.52485	1.07182	1.30077	1.80265	4.38928	1	0	0	1	1
DDB0232430	700636	DDB0232430_700636	DDB_G0278661	-2.0962	-1.81913	-2.035	-1.41729	-0.702395	-1	-1	-1	-1	0
DDB0232430	703881	DDB0232430_703881	DDB_G0278663	-1.95014	-0.42176	0.709255	1.08562	2.63283	-1	0	0	0	1
DDB0232430	750360	DDB0232430_750360	DDB_G0278359	-1.49833	-1.5186	1.09475	1.68009	1.38249	0	0	0	1	0
DDB0232430	782055	DDB0232430_782055	DDB_G0278669	0.588023	0.671906	0.172865	-1.25705	-0.497891	0	0	0	-1	0
DDB0232430	799955	DDB0232430_799955	NA	-1.99425	-1.1277	0.887388	-0.621613	-0.589383	-1	-1	0	0	0
DDB0232430	971449	DDB0232430_971449	DDB_G0278499	-2.28895	-1.9956	-1.33422	-0.621231	-0.916072	-1	-1	-1	0	0
DDB0232430	979679	DDB0232430_979679	DDB_G0278503	0.190807	0.301027	-0.340572	-0.179414	-1.23962	0	0	0	0	-1
DDB0232430	1003809	DDB0232430_1003809	NA	-0.457504	0.137672	-1.1925	0.766008	-0.529463	0	0	-1	0	0
DDB0232430	1006669	DDB0232430_1006669	DDB_G0277843	-1.34026	-1.01459	0.289827	0.98183	1.00329	-1	-1	0	0	0
DDB0232430	1060815	DDB0232430_1060815	DDB_G0278551	-0.744117	-1.66576	0.624331	0.99129	1.3377	0	-1	0	0	0
DDB0232430	1072323	DDB0232430_1072323	NA	1.54019	1.32122	0.329007	-0.579105	-0.927203	1	0	0	0	0
DDB0232430	1176876	DDB0232430_1176876	DDB_G0278785	0.610164	1.94537	1.80734	0.785366	-0.0515751	0	1	0	0	0
DDB0232430	1186467	DDB0232430_1186467	DDB_G0278793	-0.833672	0.179566	-1.47675	-0.470902	-0.582734	0	0	-1	0	0
DDB0232430	1199821	DDB0232430_1199821	DDB_G0278731	0.381906	-0.606598	-1.81016	-1.17453	-0.392571	0	0	-1	-1	0
DDB0232430	1201593	DDB0232430_1201593	DDB_G0278731	-0.922713	-1.75473	-0.271255	-1.35619	-0.624421	0	-1	0	-1	0
DDB0232430	1252700	DDB0232430_1252700	DDB_G0278945	1.9285	1.87557	0.464289	0.86294	1.53915	1	1	0	0	1
DDB0232430	1316471	DDB0232430_1316471	DDB_G0278869	-1.85457	-0.838788	-0.826881	-0.476792	-0.434536	-1	0	0	0	0
DDB0232430	1317888	DDB0232430_1317888	NA	0.516465	0.681484	1.84663	0.965108	-0.441246	0	0	1	0	0
DDB0232430	1331332	DDB0232430_1331332	DDB_G0278879	0.965864	1.17698	1.53773	2.05456	0.300128	0	0	1	1	0
DDB0232430	1345968	DDB0232430_1345968	DDB_G0278891	-2.49061	0.0429088	-0.734825	-0.52397	0.202346	-1	0	0	0	0
DDB0232430	1355759	DDB0232430_1355759	NA	-2.73861	-0.73112	-0.381469	-0.825036	-0.441968	-1	0	0	0	0
DDB0232430	1373492	DDB0232430_1373492	NA	0.542179	0.255221	0.825451	1.43188	3.04159	0	0	0	0	1
DDB0232430	1381840	DDB0232430_1381840	DDB_G0278909	-1.99644	-1.72779	-2.31899	-1.33064	-0.591805	-1	-1	-1	-1	0
DDB0232430	1419922	DDB0232430_1419922	NA	1.06169	1.12492	1.51908	1.0449	0.852214	0	0	1	0	0
DDB0232430	1436773	DDB0232430_1436773	DDB_G0280829	-0.881344	-1.72862	-0.155357	-0.128921	-0.592814	0	-1	0	0	0
DDB0232430	1468562	DDB0232430_1468562	NA	0.156232	-0.136647	-0.432492	-1.63569	0.334786	0	0	0	-1	0
DDB0232430	1617619	DDB0232430_1617619	NA	1.44241	1.33948	-0.843965	-0.219566	2.09569	0	0	0	0	1
DDB0232430	1639505	DDB0232430_1639505	DDB_G0279107	-1.88806	-1.62857	0.713995	0.71058	0.183053	-1	-1	0	0	0
DDB0232430	1709580	DDB0232430_1709580	DDB_G0279159	-0.57314	-0.259472	-0.741576	-3.48598	-1.82011	0	0	0	-1	-1
DDB0232430	1729999	DDB0232430_1729999	DDB_G0279181	-0.0506732	-1.73207	1.22359	1.05048	1.18203	0	-1	0	0	0
DDB0232430	1745545	DDB0232430_1745545	DDB_G0279195	-0.779949	-0.92822	-0.0253084	-1.63747	-0.983404	0	0	0	-1	0
DDB0232430	1763589	DDB0232430_1763589	DDB_G0279211	-0.462316	-0.491941	1.49909	2.46168	1.50198	0	0	0	1	0
DDB0232430	1764951	DDB0232430_1764951	DDB_G0279211	-1.80877	-1.55596	1.23534	-0.0207623	-0.383755	-1	-1	0	0	0
DDB0232430	1885144	DDB0232430_1885144	DDB_G0279397	-0.533708	-1.85906	-0.467062	-0.643479	-0.106914	0	-1	0	0	0
DDB0232430	2059851	DDB0232430_2059851	DDB_G0279445	1.56347	1.22091	1.26379	0.248614	-0.516267	1	0	0	0	0
DDB0232430	2152558	DDB0232430_2152558	DDB_G0279493	0.646987	-0.0658117	0.627757	-1.1763	0.173225	0	0	0	-1	0
DDB0232430	2201221	DDB0232430_2201221	DDB_G0279525	-1.9967	0.412998	-0.482185	-0.179717	-0.592096	-1	0	0	0	0
DDB0232430	2234249	DDB0232430_2234249	DDB_G0294635	0.0021612	0.68002	-1.87582	-0.409462	0.27536	0	0	-1	0	0
DDB0232430	2305773	DDB0232430_2305773	DDB_G0279585	-1.20773	-0.949285	-0.0793649	-0.0939765	-0.756439	-1	0	0	0	0
DDB0232430	2408098	DDB0232430_2408098	DDB_G0279665	1.49089	1.73475	1.2292	0.233898	-0.698972	0	1	0	0	0
DDB0232430	2409868	DDB0232430_2409868	NA	-0.721865	-0.865429	-1.73919	-0.156383	-0.431513	0	0	-1	0	0
DDB0232430	2415285	DDB0232430_2415285	DDB_G0279671	0.195044	-0.328459	-2.32273	-1.24173	-0.47833	0	0	-1	-1	0
DDB0232430	2545036	DDB0232430_2545036	DDB_G0279781	-0.0896896	-1.42191	0.36608	-0.25458	-0.478968	0	-1	0	0	0
DDB0232430	2546793	DDB0232430_2546793	DDB_G0279783	0.480851	-0.782377	0.370834	-1.29082	-0.540982	0	0	0	-1	0
DDB0232430	2561540	DDB0232430_2561540	DDB_G0279795	-0.0635569	0.57676	0.37184	-1.20461	0.154204	0	0	0	-1	0
DDB0232430	2624449	DDB0232430_2624449	DDB_G0279797	0.159371	-1.01495	0.540979	1.22604	-0.343046	0	-1	0	0	0
DDB0232430	2641989	DDB0232430_2641989	DDB_G0279863	-0.850641	-1.23554	-1.41476	-0.41306	-0.116473	0	-1	-1	0	0
DDB0232430	2663021	DDB0232430_2663021	DDB_G0279879	-1.9623	-0.292354	-0.165009	-0.440979	-0.553964	-1	0	0	0	0
DDB0232430	2715069	DDB0232430_2715069	DDB_G0279927	-0.726746	-1.0137	0.640169	0.387578	-0.743148	0	-1	0	0	0
DDB0232430	2730472	DDB0232430_2730472	NA	0.664123	1.03268	1.51046	0.668122	0.931486	0	0	1	0	0
DDB0232430	2747324	DDB0232430_2747324	DDB_G0279953	-1.95496	0.547232	-0.787159	-0.803429	-0.545827	-1	0	0	0	0
DDB0232430	2770945	DDB0232430_2770945	DDB_G0279919	0.624578	0.734732	0.044489	0.489816	-1.2146	0	0	0	0	-1
DDB0232430	2831183	DDB0232430_2831183	NA	1.50722	2.19551	0.771076	0.340477	-0.661048	1	1	0	0	0
DDB0232430	2832438	DDB0232430_2832438	NA	-0.911647	-1.85068	0.313804	-0.0115417	-0.405117	0	-1	0	0	0
DDB0232430	2868880	DDB0232430_2868880	NA	-1.07052	-0.971134	-0.774129	-0.224634	0.349861	-1	0	0	0	0
DDB0232430	2959647	DDB0232430_2959647	DDB_G0280115	-0.659666	-1.55821	0.171881	0.666863	0.24604	0	-1	0	0	0
DDB0232430	3018581	DDB0232430_3018581	NA	0.262879	-1.00336	-0.0995171	-1.48507	-0.196806	0	-1	0	-1	0
DDB0232430	3060710	DDB0232430_3060710	DDB_G0295031	0.583195	0.765241	-0.320901	-1.16183	1.23009	0	0	0	-1	0
DDB0232430	3080876	DDB0232430_3080876	DDB_G0280189	0.514296	0.347628	0.19047	-0.293463	-1.03344	0	0	0	0	-1
DDB0232430	3188647	DDB0232430_3188647	DDB_G0280059	-0.483342	-1.71406	0.663118	0.648378	1.18956	0	-1	0	0	0
DDB0232430	3196910	DDB0232430_3196910	DDB_G0280389	-2.37767	-1.31911	-0.200025	-0.314719	0.929111	-1	-1	0	0	0
DDB0232430	3250652	DDB0232430_3250652	DDB_G0280319	-1.12112	-1.7741	0.129183	0.172968	0.339621	-1	-1	0	0	0
DDB0232430	3289379	DDB0232430_3289379	DDB_G0280349	-1.87438	-0.841615	-0.18734	-0.0528442	-0.456491	-1	0	0	0	0
DDB0232430	3391906	DDB0232430_3391906	DDB_G0280461	0.616755	0.650105	0.125042	-2.12765	-0.447807	0	0	0	-1	0
DDB0232430	3435034	DDB0232430_3435034	DDB_G0280485	-0.151678	1.5089	-0.227462	-1.13181	-1.39665	0	1	0	0	0
DDB0232430	3477764	DDB0232430_3477764	DDB_G0280515	-0.185334	-1.57097	-3.5569	-0.342755	-0.401931	0	-1	-1	0	0
DDB0232430	3501419	DDB0232430_3501419	DDB_G0280541	0.176292	0.4106	-0.888084	-1.8032	-0.600508	0	0	0	-1	0
DDB0232430	3627177	DDB0232430_3627177	DDB_G0280683	-0.175275	-1.43969	-0.632321	-0.624456	-0.943377	0	-1	0	0	0
DDB0232430	3706013	DDB0232430_3706013	DDB_G0280761	0.180068	-1.12729	0.36031	1.04782	0.686545	0	-1	0	0	0
DDB0232430	3706708	DDB0232430_3706708	DDB_G0280761	2.07132	2.29976	1.11905	1.07577	0.348659	1	1	0	0	0
DDB0232430	3708125	DDB0232430_3708125	NA	1.29006	1.82154	1.21997	0.258992	1.68658	0	1	0	0	0
DDB0232430	3754738	DDB0232430_3754738	DDB_G0280811	-0.935149	-1.23228	0.451136	-0.156749	-0.374326	0	-1	0	0	0
DDB0232430	3792410	DDB0232430_3792410	NA	-1.46524	-2.0947	0.103516	-0.00777621	0.870563	-1	-1	0	0	0
DDB0232430	3795163	DDB0232430_3795163	DDB_G0280855	-1.17757	0.826044	0.640051	0.521711	0.41071	-1	0	0	0	0
DDB0232430	3815678	DDB0232430_3815678	DDB_G0280869	0.958716	1.25488	1.35137	1.46828	2.62899	0	0	0	0	1
DDB0232430	3827104	DDB0232430_3827104	DDB_G0280877	-1.98494	-1.71726	-0.344877	-1.32065	-0.579054	-1	-1	0	-1	0
DDB0232430	3854937	DDB0232430_3854937	DDB_G0280943	1.3834	1.83189	0.141909	0.776171	0.279048	0	1	0	0	0
DDB0232430	3889517	DDB0232430_3889517	NA	0.866893	0.715812	-0.0406183	-1.27896	0.0398445	0	0	0	-1	0
DDB0232430	3955196	DDB0232430_3955196	DDB_G0281031	-0.966753	-0.815449	-2.81552	-0.557994	-0.823139	0	0	-1	0	0
DDB0232430	3958127	DDB0232430_3958127	DDB_G0281035	-0.24664	0.585227	-1.37783	-1.26277	0.894702	0	0	-1	-1	0
DDB0232430	3975404	DDB0232430_3975404	DDB_G0281047	-1.93492	-1.67146	0.106529	-1.2772	-0.523602	-1	-1	0	-1	0
DDB0232430	4037548	DDB0232430_4037548	DDB_G0281089	-1.02366	-1.57771	1.08163	-0.235758	0.265225	-1	-1	0	0	0
DDB0232430	4098847	DDB0232430_4098847	DDB_G0281141	0.776063	0.571818	0.442334	-0.494769	-1.29089	0	0	0	0	-1
DDB0232430	4106731	DDB0232430_4106731	NA	0.133395	0.293542	-0.436342	0.332428	-1.44033	0	0	0	0	-1
DDB0232430	4141782	DDB0232430_4141782	DDB_G0281167	0.713904	0.667114	-1.2205	-1.24484	0.0429113	0	0	-1	-1	0
DDB0232430	4201584	DDB0232430_4201584	DDB_G0281207	1.40073	1.7101	0.616203	1.12914	1.53303	0	1	0	0	1
DDB0232430	4231738	DDB0232430_4231738	DDB_G0281217	-1.02754	-0.0467692	-0.191836	-0.699971	-0.994375	-1	0	0	0	0
DDB0232430	4233125	DDB0232430_4233125	DDB_G0281217	1.78968	1.16996	1.2071	-0.808839	-0.655573	1	0	0	0	0
DDB0232430	4361428	DDB0232430_4361428	DDB_G0281291	1.63816	1.2856	-0.0695678	-1.44981	-1.37879	1	0	0	0	0
DDB0232430	4362311	DDB0232430_4362311	DDB_G0281293	0.527333	-1.57695	-1.35615	-1.18753	-0.409163	0	-1	-1	-1	0
DDB0232430	4398750	DDB0232430_4398750	DDB_G0281357	0.815677	-1.5487	0.258047	-0.626955	0.334943	0	-1	0	0	0
DDB0232430	4404661	DDB0232430_4404661	DDB_G0281361	0.156998	-2.00265	-0.83324	0.485999	-0.924611	0	-1	0	0	0
DDB0232430	4580180	DDB0232430_4580180	DDB_G0281481	1.33962	1.21516	1.82908	3.25363	4.19404	0	0	1	1	1
DDB0232430	4599734	DDB0232430_4599734	DDB_G0281485	-2.0947	-1.01497	-1.92303	-1.41599	-0.437262	-1	-1	-1	-1	0
DDB0232430	4602104	DDB0232430_4602104	DDB_G0281485	-1.53573	-2.13784	0.104831	0.0565362	-0.512692	-1	-1	0	0	0
DDB0232430	4626668	DDB0232430_4626668	DDB_G0281499	-1.85963	-1.60254	0.224788	-1.21181	-0.440147	-1	-1	0	-1	0
DDB0232430	4677173	DDB0232430_4677173	DDB_G0281589	-1.79571	-1.54401	0.199524	-0.236346	0.668462	-1	-1	0	0	0
DDB0232430	4685628	DDB0232430_4685628	DDB_G0281595	-0.667874	-1.211	0.580286	0.938	0.276156	0	-1	0	0	0
DDB0232430	4788356	DDB0232430_4788356	DDB_G0281663	1.91501	2.10785	-0.608944	-0.126165	0.114693	0	1	0	0	0
DDB0232430	4829972	DDB0232430_4829972	DDB_G0281573	1.15866	1.25201	3.21501	2.89225	3.48293	0	0	1	1	1
DDB0232430	4873537	DDB0232430_4873537	DDB_G0281567	-0.534928	-0.604668	0.213638	-1.25148	-0.490775	0	0	0	-1	0
DDB0232430	5028876	DDB0232430_5028876	NA	-1.81078	0.246776	0.811667	-0.167836	0.306901	-1	0	0	0	0
DDB0232430	5051406	DDB0232430_5051406	NA	-1.24608	-1.83998	-0.557465	-0.314564	0.282265	-1	-1	0	0	0
DDB0232430	5080546	DDB0232430_5080546	NA	0.713059	0.467342	-0.586953	-1.2335	-0.0314953	0	0	0	-1	0
DDB0232430	5088670	DDB0232430_5088670	DDB_G0281899	0.453931	-0.970991	-0.240957	-1.16058	-0.374763	0	0	0	-1	0
DDB0232430	5109594	DDB0232430_5109594	DDB_G0281913	0.0463234	-1.73964	-0.374778	-1.34188	-0.606156	0	-1	0	-1	0
DDB0232430	5164671	DDB0232430_5164671	DDB_G0281935	0.723027	-1.10085	0.348663	-0.994729	-0.676781	0	-1	0	0	0
DDB0232430	5181834	DDB0232430_5181834	DDB_G0281967	1.186	1.56082	-1.34058	-1.48523	-1.41875	0	1	0	0	0
DDB0232430	5236323	DDB0232430_5236323	DDB_G0282007	2.5927	1.15195	-0.545513	0.945673	0.180017	1	0	0	0	0
DDB0232430	5236480	DDB0232430_5236480	DDB_G0282007	0.812777	1.13468	-0.279518	-1.5099	-0.906179	0	0	0	-1	0
DDB0232430	5339275	DDB0232430_5339275	NA	-1.07195	-1.79796	-0.164929	-0.463715	-0.17337	-1	-1	0	0	0
DDB0232430	5354198	DDB0232430_5354198	DDB_G0282059	-1.80299	-1.55067	-3.5192	-1.16261	-0.377351	-1	-1	-1	-1	0
DDB0232430	5354850	DDB0232430_5354850	DDB_G0282059	1.98321	1.29962	2.59435	2.52095	2.93997	1	0	1	1	1
DDB0232430	5356188	DDB0232430_5356188	DDB_G0282059	-1.93161	-1.42867	0.280836	-0.495216	-0.519942	-1	-1	0	0	0
DDB0232430	5387871	DDB0232430_5387871	DDB_G0282111	0.806001	0.885548	0.189966	-0.197532	-1.24512	0	0	0	0	-1
DDB0232430	5438032	DDB0232430_5438032	NA	1.29729	1.53063	0.552513	0.613736	-0.681883	0	1	0	0	0
DDB0232430	5442859	DDB0232430_5442859	DDB_G0282145	-1.30144	0.112422	-1.60161	-1.4784	-0.780392	-1	0	-1	-1	0
DDB0232430	5478425	DDB0232430_5478425	DDB_G0282167	-0.0823762	-1.10241	-0.323524	0.191499	-0.408583	0	-1	0	0	0
DDB0232430	5482038	DDB0232430_5482038	DDB_G0282141	-1.03356	-0.56535	-0.33456	0.241345	-0.0206973	-1	0	0	0	0
DDB0232430	5482239	DDB0232430_5482239	DDB_G0282141	-1.00173	-0.786759	-1.97533	-1.25901	-0.500393	-1	0	-1	-1	0
DDB0232430	5482275	DDB0232430_5482275	DDB_G0282141	-0.45087	-0.130295	-1.16656	-1.20698	-0.433988	0	0	-1	-1	0
DDB0232430	5505840	DDB0232430_5505840	DDB_G0282193	-0.967134	-0.107789	-0.44613	-1.19478	-0.418412	0	0	0	-1	0
DDB0232430	5560963	DDB0232430_5560963	DDB_G0282239	-1.07437	-0.291386	0.40852	0.965494	-0.848415	-1	0	0	0	0
DDB0232430	5600334	DDB0232430_5600334	DDB_G0282279	0.259129	-0.529145	-1.60465	-0.402932	-0.494615	0	0	-1	0	0
DDB0232430	5615120	DDB0232430_5615120	DDB_G0282305	-0.0253211	-0.674721	0.75168	1.30565	2.73545	0	0	0	0	1
DDB0232430	5656387	DDB0232430_5656387	DDB_G0282337	-0.438629	-1.04731	0.578827	0.87053	0.387254	0	-1	0	0	0
DDB0232430	5721546	DDB0232430_5721546	DDB_G0282411	0.262347	0.0366215	-0.411253	-1.3887	0.16749	0	0	0	-1	0
DDB0232430	5727654	DDB0232430_5727654	DDB_G0282377	0.59095	0.590171	0.477964	1.27757	2.3424	0	0	0	0	1
DDB0232430	5743242	DDB0232430_5743242	DDB_G0282419	0.728925	-0.364423	-1.13092	-1.35971	-0.628917	0	0	-1	-1	0
DDB0232430	5744227	DDB0232430_5744227	DDB_G0282419	0.117303	0.349002	-0.976592	-1.4056	-0.687474	0	0	0	-1	0
DDB0232430	5750351	DDB0232430_5750351	DDB_G0282423	0.624743	-0.0257116	-1.6131	0.499139	-0.119032	0	0	-1	0	0
DDB0232430	5751738	DDB0232430_5751738	NA	1.67929	-0.195638	-1.03333	-1.04447	-0.921437	1	0	0	0	0
DDB0232430	5751750	DDB0232430_5751750	NA	-0.902604	-0.462293	-0.707827	-1.18438	-0.405145	0	0	0	-1	0
DDB0232430	5781010	DDB0232430_5781010	DDB_G0282455	1.67285	1.05612	0.759997	-0.767486	-0.608915	1	0	0	0	0
DDB0232430	5799853	DDB0232430_5799853	DDB_G0295771	0.184729	0.616459	-0.0489681	-1.42253	0.143099	0	0	0	-1	0
DDB0232430	5868114	DDB0232430_5868114	NA	0.294434	0.667361	-1.92048	0.711645	0.0528682	0	0	-1	0	0
DDB0232430	5918208	DDB0232430_5918208	DDB_G0282549	2.11469	2.45407	-0.734416	-1.20217	-1.09937	1	1	0	0	0
DDB0232430	5940423	DDB0232430_5940423	DDB_G0282787	0.696676	0.306038	0.156402	-1.17681	-0.395477	0	0	0	-1	0
DDB0232430	5940682	DDB0232430_5940682	DDB_G0282787	0.45826	0.672305	-0.516686	-0.0875732	-1.07071	0	0	0	0	-1
DDB0232430	5942952	DDB0232430_5942952	DDB_G0282563	-0.795511	0.559847	-1.74202	-0.655479	-0.569536	0	0	-1	0	0
DDB0232430	5977503	DDB0232430_5977503	DDB_G0282587	-2.07908	0.332051	0.117419	-0.455006	-0.68342	-1	0	0	0	0
DDB0232430	6008658	DDB0232430_6008658	DDB_G0282621	0.150197	-0.00388505	-0.166999	0.0721628	-1.06305	0	0	0	0	-1
DDB0232430	6028505	DDB0232430_6028505	DDB_G0282629	0.419778	0.179301	0.522516	0.580012	-1.15253	0	0	0	0	-1
DDB0232430	6055454	DDB0232430_6055454	DDB_G0282647	-1.50169	-0.550148	-0.217775	-1.48531	-0.789206	-1	0	0	-1	0
DDB0232430	6080292	DDB0232430_6080292	DDB_G0282371	0.409729	0.520155	-0.223881	0.21708	-1.19382	0	0	0	0	-1
DDB0232430	6110953	DDB0232430_6110953	DDB_G0282679	-0.242581	-1.14014	0.343757	1.23711	-0.244217	0	-1	0	0	0
DDB0232430	6204463	DDB0232430_6204463	DDB_G0282723	-1.86743	-0.983454	-2.6243	-0.2944	0.0354238	-1	0	-1	0	0
DDB0232430	6242829	DDB0232430_6242829	NA	0.508195	-0.644846	1.35974	1.88928	5.01157	0	0	0	1	1
DDB0232430	6256880	DDB0232430_6256880	DDB_G0282897	0.22128	0.444734	0.812297	1.42383	4.00131	0	0	0	0	1
DDB0232430	6258819	DDB0232430_6258819	DDB_G0282815	-0.741197	-0.32589	-0.550822	-1.97391	-1.4128	0	0	0	-1	-1
DDB0232430	6259089	DDB0232430_6259089	DDB_G0282815	0.028431	-0.250906	-1.36117	-1.31495	-0.571786	0	0	-1	-1	0
DDB0232430	6285283	DDB0232430_6285283	DDB_G0282841	-1.99288	-1.72453	0.308738	-0.158552	-0.587862	-1	-1	0	0	0
DDB0232430	6339087	DDB0232430_6339087	DDB_G0282883	-0.772608	-0.99919	-2.23604	1.11265	0.0421531	0	0	-1	0	0
DDB0232430	6352623	DDB0232430_6352623	DDB_G0282905	0.54498	0.514253	-0.264408	-1.52309	-0.882677	0	0	0	-1	0
DDB0232431	60172	DDB0232431_60172	DDB_G0282963	1.18219	1.66109	0.756329	-1.23089	-0.509747	0	1	0	-1	0
DDB0232431	65905	DDB0232431_65905	NA	0.590481	0.601321	-0.533933	-1.23352	-0.467859	0	0	0	-1	0
DDB0232431	122836	DDB0232431_122836	DDB_G0283065	0.139153	-0.372957	-1.29269	0.0901205	-0.999932	0	0	-1	0	0
DDB0232431	138085	DDB0232431_138085	DDB_G0283067	-1.80074	-1.54862	1.5576	1.75368	1.0683	-1	-1	1	1	0
DDB0232431	144540	DDB0232431_144540	DDB_G0283005	1.99462	1.72233	0.0814515	0.265775	-1.02523	1	1	0	0	0
DDB0232431	163444	DDB0232431_163444	DDB_G0283015	-2.44289	-1.57584	-3.72902	0.217458	1.32144	-1	-1	-1	0	0
DDB0232431	199109	DDB0232431_199109	DDB_G0283041	-1.39592	-0.990961	-1.94368	0.711275	-0.146936	-1	0	-1	0	0
DDB0232431	214655	DDB0232431_214655	DDB_G0283097	0.422194	-0.744603	-1.70818	-0.251274	-0.458931	0	0	-1	0	0
DDB0232431	245429	DDB0232431_245429	DDB_G0283143	-1.14836	-2.20288	-0.263539	-1.78136	-1.16705	-1	-1	0	-1	-1
DDB0232431	253759	DDB0232431_253759	NA	1.38814	1.811	0.406558	-1.16096	-1.38713	0	1	0	0	0
DDB0232431	259378	DDB0232431_259378	DDB_G0283109	-0.876379	-1.75476	0.245519	-1.35622	-0.624462	0	-1	0	-1	0
DDB0232431	289956	DDB0232431_289956	DDB_G0283131	0.546778	0.421335	-0.147815	-1.30942	-0.547382	0	0	0	-1	0
DDB0232431	326602	DDB0232431_326602	DDB_G0283229	-1.09902	-0.389432	-0.890675	-1.0583	-0.55639	-1	0	0	-1	0
DDB0232431	398363	DDB0232431_398363	DDB_G0283255	0.198016	0.518621	-1.74565	-1.23578	-0.470747	0	0	-1	-1	0
DDB0232431	413722	DDB0232431_413722	DDB_G0283201	-1.87232	-0.591994	-1.68474	-0.259135	-0.454212	-1	0	-1	0	0
DDB0232431	413860	DDB0232431_413860	DDB_G0283201	-1.99827	-1.12898	-0.762636	0.724857	-0.593841	-1	-1	0	0	0
DDB0232431	435953	DDB0232431_435953	DDB_G0283329	-1.09134	0.151089	0.432161	0.829032	2.23033	-1	0	0	0	0
DDB0232431	466452	DDB0232431_466452	DDB_G0283289	-1.03963	0.254814	0.215382	1.19433	-0.383867	-1	0	0	0	0
DDB0232431	477641	DDB0232431_477641	NA	0.501747	0.428405	0.604966	1.09456	1.96055	0	0	0	0	1
DDB0232431	511629	DDB0232431_511629	DDB_G0283309	-1.36252	-2.26882	-1.55515	-0.854832	-1.24688	-1	-1	-1	0	-1
DDB0232431	616482	DDB0232431_616482	DDB_G0283403	0.133098	-1.19042	-0.885618	-0.891518	0.0490973	0	-1	0	0	0
DDB0232431	633173	DDB0232431_633173	DDB_G0283407	0.946136	0.274719	-0.145551	-1.41751	-0.110547	0	0	0	-1	0
DDB0232431	699907	DDB0232431_699907	DDB_G0283439	-0.968793	-1.27187	0.226459	-0.525325	-0.987917	0	-1	0	0	0
DDB0232431	710724	DDB0232431_710724	DDB_G0283447	0.140853	-0.750776	-1.24984	-0.35884	-0.820319	0	0	-1	0	0
DDB0232431	767296	DDB0232431_767296	DDB_G0283531	0.348645	0.579248	0.230464	-1.08513	-0.792163	0	0	0	-1	0
DDB0232431	802905	DDB0232431_802905	DDB_G0283549	-0.775294	-0.0896409	-1.11459	1.92728	2.81542	0	0	0	0	1
DDB0232431	807178	DDB0232431_807178	DDB_G0283595	-0.866858	-0.0824838	-0.268096	-1.22697	-0.459499	0	0	0	-1	0
DDB0232431	809349	DDB0232431_809349	DDB_G0283595	-0.955337	-1.07968	0.284657	-1.26809	0.94355	0	-1	0	-1	0
DDB0232431	849833	DDB0232431_849833	NA	0.539343	-1.20179	0.140107	0.270265	0.113219	0	-1	0	0	0
DDB0232431	876268	DDB0232431_876268	DDB_G0283623	0.777749	0.726328	0.630353	-1.16649	-0.382315	0	0	0	-1	0
DDB0232431	884096	DDB0232431_884096	DDB_G0283627	0.251312	-0.360423	-0.14996	-1.58491	-0.91633	0	0	0	-1	0
DDB0232431	932906	DDB0232431_932906	DDB_G0283749	-1.89371	-1.63374	-0.626462	-1.24141	-0.477928	-1	-1	0	-1	0
DDB0232431	1010139	DDB0232431_1010139	DDB_G0283709	-0.282738	-1.62704	-1.00551	-1.23506	-0.469822	0	-1	-1	-1	0
DDB0232431	1027653	DDB0232431_1027653	DDB_G0283719	-0.663873	-1.58859	-3.5896	-1.19857	-0.423256	0	-1	-1	-1	0
DDB0232431	1036269	DDB0232431_1036269	DDB_G0283725	1.21298	1.10594	1.15423	1.62382	3.36029	0	0	0	1	1
DDB0232431	1058253	DDB0232431_1058253	NA	-0.307494	-1.75321	-2.31659	-1.35475	-0.529145	0	-1	-1	-1	0
DDB0232431	1082044	DDB0232431_1082044	DDB_G0283773	-0.926556	0.0513535	-1.12745	-0.0895025	0.766635	0	0	-1	0	0
DDB0232431	1082491	DDB0232431_1082491	DDB_G0283773	-0.973683	-2.23578	0.351052	0.413878	0.0886458	0	-1	0	0	0
DDB0232431	1083032	DDB0232431_1083032	DDB_G0283773	-2.21814	-1.93077	1.44918	1.22124	1.69724	-1	-1	0	0	0
DDB0232431	1142839	DDB0232431_1142839	DDB_G0283879	0.406	0.341073	-0.767993	-1.38255	-0.658066	0	0	0	-1	0
DDB0232431	1155412	DDB0232431_1155412	DDB_G0283819	0.24722	-2.28859	-0.130894	-0.660163	-1.27083	0	-1	0	0	-1
DDB0232431	1190744	DDB0232431_1190744	NA	0.305238	-0.603657	1.15421	1.61669	0.243835	0	0	0	1	0
DDB0232431	1220039	DDB0232431_1220039	DDB_G0283893	-0.783843	-1.16114	-2.18557	-0.494748	-0.801194	0	-1	-1	0	0
DDB0232431	1237545	DDB0232431_1237545	DDB_G0283761	1.09179	1.87241	0.333694	0.329874	0.10343	0	1	0	0	0
DDB0232431	1296679	DDB0232431_1296679	DDB_G0283995	-1.35147	-0.0811572	0.0152698	0.776598	-0.530034	-1	0	0	0	0
DDB0232431	1314786	DDB0232431_1314786	DDB_G0284001	0.730786	0.871497	0.655696	-1.18587	0.440623	0	0	0	-1	0
DDB0232431	1326295	DDB0232431_1326295	DDB_G0283931	-1.84171	-1.58613	-3.58504	-0.965111	-0.420281	-1	-1	-1	0	0
DDB0232431	1326885	DDB0232431_1326885	DDB_G0283931	-0.877392	-1.08331	-0.262713	0.841168	-0.431141	0	-1	0	0	0
DDB0232431	1340027	DDB0232431_1340027	DDB_G0283939	-0.538936	-1.75041	-0.167414	0.47926	0.0730077	0	-1	0	0	0
DDB0232431	1399282	DDB0232431_1399282	DDB_G0284007	-2.22101	-1.9334	-1.85108	-0.484599	-0.0753409	-1	-1	-1	0	0
DDB0232431	1401242	DDB0232431_1401242	DDB_G0283969	0.103835	-1.27231	0.0361761	-1.47104	-0.856581	0	-1	0	-1	0
DDB0232431	1430450	DDB0232431_1430450	DDB_G0284011	-0.882599	-0.86779	-3.58231	-0.314936	0.460207	0	0	-1	0	0
DDB0232431	1447579	DDB0232431_1447579	DDB_G0284021	0.13167	-1.8455	1.00795	1.21052	0.338862	0	-1	0	0	0
DDB0232431	1493425	DDB0232431_1493425	DDB_G0284065	0.0224305	-1.64366	-3.69186	-1.25082	-0.48994	0	-1	-1	-1	0
DDB0232431	1506987	DDB0232431_1506987	DDB_G0284073	0.792936	0.224007	-2.03401	-1.36652	-0.637596	0	0	-1	-1	0
DDB0232431	1532274	DDB0232431_1532274	DDB_G0284077	-1.99861	-0.718768	-0.329359	-0.294082	-0.594213	-1	0	0	0	0
DDB0232431	1534130	DDB0232431_1534130	DDB_G0284149	-2.12009	-1.841	-2.62002	-1.43804	-0.728879	-1	-1	-1	-1	0
DDB0232431	1555233	DDB0232431_1555233	DDB_G0284089	-0.33461	0.136169	0.551776	-1.36614	-0.637114	0	0	0	-1	0
DDB0232431	1587625	DDB0232431_1587625	NA	0.549191	-1.55619	0.382391	0.346891	0.00887339	0	-1	0	0	0
DDB0232431	1636812	DDB0232431_1636812	DDB_G0284135	-0.822498	-0.0191445	1.383	2.1679	1.01979	0	0	0	1	0
DDB0232431	1649422	DDB0232431_1649422	DDB_G0284171	-1.8951	-1.63501	-2.1281	-1.01149	-0.479469	-1	-1	-1	-1	0
DDB0232431	1671044	DDB0232431_1671044	DDB_G0284191	-0.807849	-2.21564	0.877503	0.658658	0.248276	0	-1	0	0	0
DDB0232431	1732875	DDB0232431_1732875	DDB_G0284239	0.21275	0.262458	-1.07912	0.667332	-0.62869	0	0	-1	0	0
DDB0232431	1733847	DDB0232431_1733847	DDB_G0284241	-0.945669	-1.03201	-1.6407	-0.161196	-0.0341582	0	-1	-1	0	0
DDB0232431	1812398	DDB0232431_1812398	DDB_G0284327	-0.00390639	-0.479044	-0.748244	1.55471	-0.921529	0	0	0	1	0
DDB0232431	1812463	DDB0232431_1812463	DDB_G0284327	-0.396021	-1.18207	-0.59074	0.96493	2.6598	0	0	0	0	1
DDB0232431	1812710	DDB0232431_1812710	DDB_G0284327	-1.12909	-1.76974	-1.94712	-0.178165	-0.161792	-1	-1	-1	0	0
DDB0232431	1821302	DDB0232431_1821302	DDB_G0284275	-1.07697	-0.260638	-0.208817	0.487087	-0.711147	-1	0	0	0	0
DDB0232431	1832986	DDB0232431_1832986	DDB_G0284285	0.629452	-1.02213	1.22132	0.66129	0.0659376	0	-1	0	0	0
DDB0232431	1844501	DDB0232431_1844501	DDB_G0284295	-1.0679	-0.803204	-1.2468	-1.11098	-1.13159	-1	0	-1	-1	-1
DDB0232431	1844599	DDB0232431_1844599	DDB_G0284295	-0.305552	0.0154427	-1.56774	-0.12023	-0.559406	0	0	-1	0	0
DDB0232431	1844853	DDB0232431_1844853	DDB_G0284295	-0.444098	-0.282785	1.14223	0.839775	2.70492	0	0	0	0	1
DDB0232431	1844857	DDB0232431_1844857	DDB_G0284295	0.0672999	0.434656	1.124	1.2961	3.61985	0	0	0	0	1
DDB0232431	1886616	DDB0232431_1886616	DDB_G0284335	0.657229	-0.34006	0.585083	-1.19286	0.207764	0	0	0	-1	0
DDB0232431	1906685	DDB0232431_1906685	DDB_G0284375	0.958643	0.731339	1.08975	1.55695	2.77308	0	0	0	1	1
DDB0232431	1918932	DDB0232431_1918932	DDB_G0284381	1.59746	1.55918	-0.850451	0.680175	-0.523155	1	1	0	0	0
DDB0232431	1919799	DDB0232431_1919799	DDB_G0284381	0.0279315	0.870829	-0.667593	-1.40319	-0.684406	0	0	0	-1	0
DDB0232431	1948537	DDB0232431_1948537	DDB_G0284333	-1.21793	-0.550124	0.0111029	-0.576952	-0.668787	-1	0	0	0	0
DDB0232431	2117653	DDB0232431_2117653	NA	0.91602	0.944501	0.277106	-1.53926	-0.491933	0	0	0	-1	0
DDB0232431	2128563	DDB0232431_2128563	DDB_G0284469	-1.95695	-1.69164	-0.411322	-0.380571	-0.548033	-1	-1	0	0	0
DDB0232431	2209193	DDB0232431_2209193	DDB_G0284599	-0.148833	-0.334933	-1.55506	-0.453115	0.61164	0	0	-1	0	0
DDB0232431	2254100	DDB0232431_2254100	DDB_G0284721	-2.54151	-1.90183	-1.3771	1.00685	0.79093	-1	-1	-1	0	0
DDB0232431	2254316	DDB0232431_2254316	DDB_G0284721	-0.202806	-1.93823	0.106537	0.601653	1.03825	0	-1	0	0	0
DDB0232431	2269202	DDB0232431_2269202	NA	-1.15617	-0.85973	-0.294194	0.79468	1.47161	-1	0	0	0	0
DDB0232431	2328704	DDB0232431_2328704	DDB_G0284729	0.60941	0.733233	-0.432428	-0.298931	-1.19986	0	0	0	0	-1
DDB0232431	2332208	DDB0232431_2332208	DDB_G0284677	0.049011	0.374462	-0.179151	-1.30408	-0.739704	0	0	0	-1	0
DDB0232431	2434425	DDB0232431_2434425	DDB_G0284753	-0.958924	-1.16876	0.826138	0.897351	1.37711	0	-1	0	0	0
DDB0232431	2494825	DDB0232431_2494825	DDB_G0284839	0.363829	-0.0529244	-0.50118	0.318814	2.46094	0	0	0	0	1
DDB0232431	2550684	DDB0232431_2550684	DDB_G0284859	0.238689	-1.83154	-2.17172	-1.42906	-0.717422	0	-1	-1	-1	0
DDB0232431	2563517	DDB0232431_2563517	NA	2.12939	2.17615	1.31112	1.71469	1.83131	1	1	0	1	0
DDB0232431	2580258	DDB0232431_2580258	DDB_G0284867	0.75437	0.394752	-1.18953	-0.709913	-0.884473	0	0	-1	0	0
DDB0232431	2610201	DDB0232431_2610201	DDB_G0284895	-0.361911	-0.478402	-1.42143	-0.142552	-0.64659	0	0	-1	0	0
DDB0232431	2633035	DDB0232431_2633035	DDB_G0285055	0.161116	0.125863	-1.59301	-0.40971	-1.34929	0	0	-1	0	-1
DDB0232431	2664067	DDB0232431_2664067	DDB_G0284935	-1.94076	-0.93777	-0.483505	0.55224	-0.530085	-1	0	0	0	0
DDB0232431	2736028	DDB0232431_2736028	DDB_G0284975	-0.323076	-0.275709	1.05245	2.04712	-1.0676	0	0	0	1	0
DDB0232431	2736932	DDB0232431_2736932	DDB_G0284975	0.250046	-1.07197	0.805186	-1.02134	-0.671709	0	-1	0	-1	0
DDB0232431	2744564	DDB0232431_2744564	NA	0.0958574	-0.748982	-0.749838	-1.33993	-0.603669	0	0	0	-1	0
DDB0232431	2753059	DDB0232431_2753059	DDB_G0284983	0.215518	0.894364	-0.0426503	1.83737	0.06922	0	0	0	1	0
DDB0232431	2817314	DDB0232431_2817314	DDB_G0285083	-2.25033	-1.96024	-0.512319	-1.55117	-0.873263	-1	-1	0	-1	0
DDB0232431	2870237	DDB0232431_2870237	DDB_G0285153	-0.253446	-0.939344	-3.52898	-1.1676	-0.38373	0	0	-1	-1	0
DDB0232431	2894790	DDB0232431_2894790	NA	-1.85963	0.88499	0.136756	0.498776	1.51708	-1	0	0	0	0
DDB0232431	2932471	DDB0232431_2932471	DDB_G0285171	-1.26825	0.637462	-2.92809	0.416411	-0.872464	-1	0	-1	0	0
DDB0232431	2979192	DDB0232431_2979192	DDB_G0294515	-1.82886	-1.57436	0.725977	1.59067	0.801871	-1	-1	0	1	0
DDB0232431	3006067	DDB0232431_3006067	NA	-0.135534	-1.27982	-0.298669	-1.33083	0.370917	0	-1	0	-1	0
DDB0232431	3028140	DDB0232431_3028140	DDB_G0285261	-0.50867	-1.72209	0.584096	0.112452	0.175567	0	-1	0	0	0
DDB0232431	3129500	DDB0232431_3129500	NA	-2.50342	-2.19196	-1.22991	-0.706022	-0.298962	-1	-1	-1	0	0
DDB0232431	3147314	DDB0232431_3147314	DDB_G0285351	0.290054	0.536016	1.29317	-1.00381	-0.542698	0	0	0	-1	0
DDB0232431	3158056	DDB0232431_3158056	DDB_G0285403	1.51669	-0.189043	0.642703	-0.873137	-0.728122	1	0	0	0	0
DDB0232431	3192572	DDB0232431_3192572	DDB_G0285411	1.61648	1.23453	0.881291	-1.29353	-1.20246	1	0	0	0	0
DDB0232431	3234668	DDB0232431_3234668	NA	0.415031	0.504125	-0.0988746	-0.753193	-1.04912	0	0	0	0	-1
DDB0232431	3351687	DDB0232431_3351687	DDB_G0285535	-1.17754	-0.868697	-1.27436	0.00626238	-0.593051	-1	0	-1	0	0
DDB0232431	3393734	DDB0232431_3393734	DDB_G0285569	-1.36375	0.20596	-0.311521	1.20759	2.52565	-1	0	0	0	1
DDB0232431	3408072	DDB0232431_3408072	NA	-1.2695	-2.00263	-0.273406	-0.55913	-0.924579	-1	-1	0	0	0
DDB0232431	3412557	DDB0232431_3412557	DDB_G0285585	-0.958765	-1.81726	0.459156	0.833243	1.14457	0	-1	0	0	0
DDB0232431	3437455	DDB0232431_3437455	DDB_G0285761	-0.336378	-0.652081	-2.40942	-1.20137	-0.426825	0	0	-1	-1	0
DDB0232431	3440030	DDB0232431_3440030	DDB_G0285763	0.336305	0.993579	1.21894	1.5222	1.81111	0	0	0	1	0
DDB0232431	3504180	DDB0232431_3504180	DDB_G0285791	-1.79471	0.281591	0.0244933	0.989822	-0.368168	-1	0	0	0	0
DDB0232431	3512162	DDB0232431_3512162	DDB_G0285637	0.140663	-0.851783	-0.119159	-1.29003	-0.834971	0	0	0	-1	0
DDB0232431	3554716	DDB0232431_3554716	DDB_G0285663	-0.566216	0.114736	0.421478	-1.42644	-0.714079	0	0	0	-1	0
DDB0232431	3575308	DDB0232431_3575308	NA	-1.12271	-1.38674	-0.632781	-1.61149	-0.344692	-1	-1	0	-1	0
DDB0232431	3631840	DDB0232431_3631840	DDB_G0285717	-0.773479	-0.038599	-0.433319	-1.30701	-0.113067	0	0	0	-1	0
DDB0232431	3685679	DDB0232431_3685679	DDB_G0285807	-2.59025	-1.69342	0.169104	0.804234	-0.566927	-1	-1	0	0	0
DDB0232431	3728558	DDB0232431_3728558	DDB_G0285943	-0.562964	-1.88451	0.77041	1.3426	1.96889	0	-1	0	0	0
DDB0232431	3747153	DDB0232431_3747153	DDB_G0285873	1.32965	1.00955	1.05027	1.80424	1.96056	0	0	0	1	1
DDB0232431	3785381	DDB0232431_3785381	DDB_G0285891	0.239012	-0.67729	-2.05067	-1.26747	0.217546	0	0	-1	-1	0
DDB0232431	3803571	DDB0232431_3803571	NA	-1.88656	-0.579904	-0.522093	-1.2352	-0.469996	-1	0	0	-1	0
DDB0232431	3808675	DDB0232431_3808675	DDB_G0285903	1.83425	0.0415877	0.0838138	-0.497024	0.334828	1	0	0	0	0
DDB0232431	3809269	DDB0232431_3809269	DDB_G0285903	-1.698	-1.71647	0.10619	0.824233	2.43505	0	0	0	0	1
DDB0232431	3812486	DDB0232431_3812486	NA	-1.26129	-1.83914	-0.432996	-0.214536	-0.726624	-1	-1	0	0	0
DDB0232431	3822777	DDB0232431_3822777	DDB_G0285915	-0.243167	0.131105	0.898915	1.20092	2.11719	0	0	0	0	1
DDB0232431	3908185	DDB0232431_3908185	NA	0.379392	0.379876	0.214676	-1.22651	0.183415	0	0	0	-1	0
DDB0232431	3910548	DDB0232431_3910548	NA	0.96216	0.204683	1.59399	1.28918	0.451901	0	0	1	0	0
DDB0232431	3961877	DDB0232431_3961877	DDB_G0286103	-0.892123	-1.74058	-0.0558345	-0.526544	-0.607293	0	-1	0	0	0
DDB0232431	3998933	DDB0232431_3998933	DDB_G0286049	-1.27264	-1.29495	0.691997	1.59322	0.212088	0	0	0	1	0
DDB0232431	4055567	DDB0232431_4055567	DDB_G0286093	-1.94343	-1.67926	-0.357302	-1.2846	-0.533043	-1	-1	0	-1	0
DDB0232431	4090904	DDB0232431_4090904	NA	0.800667	0.76374	0.164676	0.379779	-1.08558	0	0	0	0	-1
DDB0232431	4095267	DDB0232431_4095267	DDB_G0286119	0.798645	-1.75475	0.783131	-0.33685	-0.624448	0	-1	0	0	0
DDB0232431	4095792	DDB0232431_4095792	DDB_G0286119	0.657175	0.0136793	-0.0130155	0.542882	1.61947	0	0	0	0	1
DDB0232431	4098553	DDB0232431_4098553	NA	1.56816	0.5517	1.02633	1.63274	0.599546	1	0	0	1	0
DDB0232431	4114141	DDB0232431_4114141	DDB_G0286127	0.379296	0.935826	-0.62221	-1.68217	-1.0857	0	0	0	-1	-1
DDB0232431	4114534	DDB0232431_4114534	DDB_G0286127	-0.723615	0.189891	-0.331916	0.222984	-1.08749	0	0	0	0	-1
DDB0232431	4147131	DDB0232431_4147131	DDB_G0286157	1.82223	-1.14732	-0.404401	0.194964	-0.802869	1	0	0	0	0
DDB0232431	4154567	DDB0232431_4154567	DDB_G0286163	-0.337061	-0.107926	-1.1604	-0.6118	-0.241989	0	0	-1	0	0
DDB0232431	4165471	DDB0232431_4165471	DDB_G0286197	-2.05992	-0.737133	-1.525	-0.290874	0.353947	-1	0	-1	0	0
DDB0232431	4214760	DDB0232431_4214760	DDB_G0286227	-1.10842	-0.731284	-0.0348239	-1.37137	-0.729377	-1	0	0	-1	0
DDB0232431	4242153	DDB0232431_4242153	DDB_G0286243	0.494139	0.810411	0.5127	-1.18986	-0.593921	0	0	0	-1	0
DDB0232431	4279520	DDB0232431_4279520	NA	-0.612134	-1.17575	-0.194368	-1.09128	-0.439948	0	-1	0	-1	0
DDB0232431	4287337	DDB0232431_4287337	NA	0.663326	0.950833	0.668376	-1.40569	-0.00443736	0	0	0	-1	0
DDB0232431	4298615	DDB0232431_4298615	DDB_G0286285	-1.20531	-0.0479644	-0.378513	0.53815	-0.266813	-1	0	0	0	0
DDB0232431	4329000	DDB0232431_4329000	DDB_G0286345	-1.95877	-1.6933	-0.883135	-0.399987	-0.550044	-1	-1	0	0	0
DDB0232431	4384303	DDB0232431_4384303	DDB_G0286377	-1.94113	-1.67715	-2.77412	-1.28259	-0.530488	-1	-1	-1	-1	0
DDB0232431	4393841	DDB0232431_4393841	DDB_G0286385	-0.956089	-1.29896	-2.35017	-0.028508	-0.571972	0	-1	-1	0	0
DDB0232431	4419554	DDB0232431_4419554	DDB_G0286405	-1.98873	-1.72073	-0.229741	0.416042	-0.0152033	-1	-1	0	0	0
DDB0232431	4459161	DDB0232431_4459161	DDB_G0286417	-1.8192	-1.56552	-1.31879	-1.17669	-0.395323	-1	-1	-1	-1	0
DDB0232431	4479977	DDB0232431_4479977	DDB_G0286429	0.875642	0.595398	-0.0221412	1.0784	3.56343	0	0	0	0	1
DDB0232431	4519925	DDB0232431_4519925	NA	0.613374	0.64581	-0.596584	-1.40671	-0.0811658	0	0	0	-1	0
DDB0232431	4629858	DDB0232431_4629858	DDB_G0286545	-2.18781	-1.903	-4.17341	-1.49686	-0.803949	-1	-1	-1	-1	0
DDB0232431	4644272	DDB0232431_4644272	DDB_G0286567	-2.06695	-1.79235	1.00435	0.691191	1.98423	-1	-1	0	0	0
DDB0232431	4696651	DDB0232431_4696651	DDB_G0286605	1.48376	1.50425	0.335663	-0.0626664	-0.231474	0	1	0	0	0
DDB0232431	4704642	DDB0232431_4704642	DDB_G0286611	1.36494	1.95755	0.963807	1.3968	-0.495729	0	1	0	0	0
DDB0232431	4756446	DDB0232431_4756446	DDB_G0286627	-0.908904	0.645252	-1.1955	-0.319223	-0.523703	0	0	-1	0	0
DDB0232431	4769137	DDB0232431_4769137	DDB_G0286809	0.302309	-1.75492	-0.0890694	0.605437	1.84127	0	-1	0	0	0
DDB0232431	4771249	DDB0232431_4771249	DDB_G0286809	0.0207373	0.252629	-0.688023	-1.47704	-0.506564	0	0	0	-1	0
DDB0232431	4790387	DDB0232431_4790387	DDB_G0286649	-1.00037	-0.128956	-0.087769	-0.384908	-0.900546	-1	0	0	0	0
DDB0232431	4791431	DDB0232431_4791431	DDB_G0286651	-1.82636	-1.84368	1.72035	2.39706	2.01781	0	0	1	1	1
DDB0232431	4863775	DDB0232431_4863775	DDB_G0286817	0.510081	0.602703	-0.350751	-0.766196	-1.00402	0	0	0	0	-1
DDB0232431	4931237	DDB0232431_4931237	DDB_G0286753	-2.26192	-1.97086	0.790875	0.518917	0.271701	-1	-1	0	0	0
DDB0232431	5037963	DDB0232431_5037963	DDB_G0286895	0.730767	1.83334	-1.05585	-0.534076	-0.345556	0	1	0	0	0
DDB0232431	5038005	DDB0232431_5038005	DDB_G0286895	-0.134931	-1.06917	-0.382542	1.16349	-0.0997524	0	-1	0	0	0
DDB0232431	5054391	DDB0232431_5054391	DDB_G0286967	0.810617	0.347967	1.45122	2.14851	4.27247	0	0	0	1	1
DDB0232431	5055783	DDB0232431_5055783	DDB_G0286967	0.816893	0.471364	1.69802	1.9633	3.81598	0	0	1	1	1
DDB0232431	5088369	DDB0232431_5088369	DDB_G0286925	0.583576	0.581255	-0.108229	0.0530626	-1.50204	0	0	0	0	-1
DDB0232431	5089038	DDB0232431_5089038	DDB_G0286925	0.552393	0.530987	0.796528	-1.17482	-0.0509519	0	0	0	-1	0
DDB0232431	5106899	DDB0232431_5106899	DDB_G0286931	-0.720874	-0.940277	-2.63084	-0.517917	-0.595484	0	0	-1	0	0
DDB0232431	5114713	DDB0232431_5114713	DDB_G0286935	0.181129	0.588831	-0.0858145	-1.63351	-0.978356	0	0	0	-1	0
DDB0232431	5163451	DDB0232431_5163451	DDB_G0286983	0.781783	0.294212	0.919092	-1.11835	-0.335421	0	0	0	-1	0
DDB0232431	5207482	DDB0232431_5207482	DDB_G0287015	0.212603	-0.370464	-1.94547	0.569651	-0.603126	0	0	-1	0	0
DDB0232431	5232033	DDB0232431_5232033	DDB_G0287051	0.532516	0.285799	-1.77804	-0.0613309	0.167828	0	0	-1	0	0
DDB0232431	5340555	DDB0232431_5340555	DDB_G0287099	0.820975	0.739305	0.759022	1.54118	3.68374	0	0	0	1	1
DDB0232431	5352961	DDB0232431_5352961	DDB_G0287129	-0.535458	-1.08948	0.278296	-0.215843	-0.715072	0	-1	0	0	0
DDB0232432	29814	DDB0232432_29814	DDB_G0287231	0.417675	0.234712	0.063322	-1.57448	0.414965	0	0	0	-1	0
DDB0232432	125875	DDB0232432_125875	DDB_G0287317	-0.691144	-1.70511	0.364062	-1.30912	-0.564346	0	-1	0	-1	0
DDB0232432	138772	DDB0232432_138772	DDB_G0287325	-1.96713	-1.70096	-1.04533	-1.30518	-0.559316	-1	-1	-1	-1	0
DDB0232432	162549	DDB0232432_162549	DDB_G0287347	0.877007	0.904625	0.553748	0.424928	-1.18831	0	0	0	0	-1
DDB0232432	182810	DDB0232432_182810	DDB_G0287417	-1.01239	0.329411	-2.23784	-1.22311	-0.454578	-1	0	-1	-1	0
DDB0232432	202383	DDB0232432_202383	DDB_G0287365	-1.07508	-0.852781	2.11816	2.97101	4.73965	0	0	1	1	1
DDB0232432	213441	DDB0232432_213441	DDB_G0287295	-1.085	-1.75807	-3.90431	-1.35937	-0.628474	-1	-1	-1	-1	0
DDB0232432	227705	DDB0232432_227705	DDB_G0287291	-0.615086	-1.32822	0.193962	0.485569	0.563342	0	-1	0	0	0
DDB0232432	251178	DDB0232432_251178	DDB_G0287395	-1.19659	-1.81206	-0.472738	0.824981	-0.0672538	-1	-1	0	0	0
DDB0232432	274774	DDB0232432_274774	DDB_G0287413	2.13568	0.432332	1.29417	-0.543848	-0.356582	1	0	0	0	0
DDB0232432	281615	DDB0232432_281615	NA	-0.766692	0.431438	-2.26821	-1.25557	-0.495998	0	0	-1	-1	0
DDB0232432	318639	DDB0232432_318639	DDB_G0287459	-2.24056	-1.03408	-2.86653	-1.71824	-1.08649	-1	-1	-1	-1	-1
DDB0232432	343567	DDB0232432_343567	DDB_G0287511	1.00998	1.1913	-0.155397	-1.28169	-0.529331	0	0	0	-1	0
DDB0232432	362473	DDB0232432_362473	DDB_G0287519	-0.0647737	-1.83159	-1.02517	0.800337	-0.228554	0	-1	-1	0	0
DDB0232432	368630	DDB0232432_368630	DDB_G0287571	-0.473014	-0.816558	-0.164729	-1.40386	-0.685259	0	0	0	-1	0
DDB0232432	393980	DDB0232432_393980	DDB_G0287575	-1.85762	-1.6007	-1.52533	-0.184428	-0.437919	-1	-1	-1	0	0
DDB0232432	432003	DDB0232432_432003	NA	1.39104	1.57424	0.629762	1.08216	1.48822	0	1	0	0	0
DDB0232432	462231	DDB0232432_462231	DDB_G0287587	0.631293	-0.331568	-1.76182	0.217161	-0.394168	0	0	-1	0	0
DDB0232432	480441	DDB0232432_480441	DDB_G0287617	-1.85616	-0.983073	-0.807451	-0.426637	0.388404	-1	0	0	0	0
DDB0232432	504790	DDB0232432_504790	DDB_G0287665	0.418499	-1.59779	-0.00261477	-1.2073	-0.434398	0	-1	0	-1	0
DDB0232432	526711	DDB0232432_526711	DDB_G0287593	1.26499	1.23552	0.978534	-1.16146	-0.528882	0	0	0	-1	0
DDB0232432	549060	DDB0232432_549060	DDB_G0287679	-1.84403	-0.854085	0.507596	-1.19826	-0.422852	-1	0	0	-1	0
DDB0232432	645409	DDB0232432_645409	DDB_G0287745	-1.87596	-0.566048	0.097302	-0.298667	-0.458251	-1	0	0	0	0
DDB0232432	678832	DDB0232432_678832	DDB_G0287773	-0.685068	-1.72389	0.998882	1.14629	1.13435	0	-1	0	0	0
DDB0232432	696262	DDB0232432_696262	DDB_G0287859	0.585134	0.564304	-0.263828	-1.21351	-0.575074	0	0	0	-1	0
DDB0232432	701092	DDB0232432_701092	NA	-1.07801	-0.437958	-0.276422	0.808069	0.285393	-1	0	0	0	0
DDB0232432	830503	DDB0232432_830503	NA	-1.22455	0.194683	-0.390846	-1.54023	-0.859303	-1	0	0	-1	0
DDB0232432	849791	DDB0232432_849791	NA	-0.878389	0.565365	0.28206	-1.30028	-0.598306	0	0	0	-1	0
DDB0232432	851495	DDB0232432_851495	NA	-0.195043	-0.611005	1.06537	1.609	-0.982159	0	0	0	1	0
DDB0232432	942271	DDB0232432_942271	DDB_G0287995	-1.87396	-1.61565	-0.32604	-1.22425	-0.456029	-1	-1	0	-1	0
DDB0232432	988925	DDB0232432_988925	DDB_G0288023	1.55697	1.35007	0.32798	0.247227	-0.814577	1	0	0	0	0
DDB0232432	992937	DDB0232432_992937	DDB_G0288027	-1.01475	-0.787989	-0.897901	-0.316715	-0.0440258	-1	0	0	0	0
DDB0232432	1073765	DDB0232432_1073765	DDB_G0288121	-1.03571	-0.36461	0.0632865	0.437252	-0.516845	-1	0	0	0	0
DDB0232432	1117411	DDB0232432_1117411	NA	0.14734	0.707617	-1.23286	-0.176969	-0.367337	0	0	-1	0	0
DDB0232432	1152832	DDB0232432_1152832	DDB_G0288149	0.71195	0.305665	0.0306889	-1.23207	-0.466005	0	0	0	-1	0
DDB0232432	1168465	DDB0232432_1168465	DDB_G0288161	-0.094524	1.24987	1.00121	1.56181	0.992314	0	0	0	1	0
DDB0232432	1181641	DDB0232432_1181641	DDB_G0288187	-1.01738	-0.832225	-0.466143	-1.17595	0.861663	-1	0	0	-1	0
DDB0232432	1194463	DDB0232432_1194463	NA	0.62785	0.966412	-0.951696	-0.792088	-1.05649	0	0	0	0	-1
DDB0232432	1207651	DDB0232432_1207651	DDB_G0288197	-0.0595866	-0.581512	-1.63861	-0.0251551	-0.367761	0	0	-1	0	0
DDB0232432	1288010	DDB0232432_1288010	DDB_G0288251	-1.47075	-0.108277	0.299598	0.81644	0.734263	-1	0	0	0	0
DDB0232432	1316788	DDB0232432_1316788	DDB_G0288245	-0.0449249	-1.02286	0.0809946	0.5771	0.591839	0	-1	0	0	0
DDB0232432	1323382	DDB0232432_1323382	DDB_G0288249	-2.25855	-1.96777	-2.35264	-1.5583	1.99711	-1	-1	-1	-1	0
DDB0232432	1392483	DDB0232432_1392483	DDB_G0288363	0.321938	-1.00009	0.358685	1.27694	0.172963	0	-1	0	0	0
DDB0232432	1450598	DDB0232432_1450598	DDB_G0295779	0.316258	-1.0741	0.196956	-1.39917	-0.974255	0	-1	0	-1	0
DDB0232432	1460837	DDB0232432_1460837	DDB_G0288381	0.113882	-0.406143	-2.40947	-0.348016	0.141795	0	0	-1	0	0
DDB0232432	1538582	DDB0232432_1538582	DDB_G0288437	-0.967142	0.721317	-1.52616	-1.39937	-0.679532	0	0	-1	-1	0
DDB0232432	1552121	DDB0232432_1552121	DDB_G0288459	-1.79485	-1.81245	0.146081	1.65619	-0.916986	0	0	0	1	0
DDB0232432	1604694	DDB0232432_1604694	DDB_G0288493	0.702912	0.79515	1.54503	0.997613	-0.832869	0	0	1	0	0
DDB0232432	1614820	DDB0232432_1614820	DDB_G0288497	-1.04827	-0.865581	0.611018	0.347224	0.159506	-1	0	0	0	0
DDB0232432	1627321	DDB0232432_1627321	NA	0.359742	-0.747252	0.0608268	-1.26556	-0.0693333	0	0	0	-1	0
DDB0232432	1637938	DDB0232432_1637938	DDB_G0288521	-2.0329	-1.76117	-1.47069	-1.18537	-0.632227	-1	-1	-1	-1	0
DDB0232432	1700404	DDB0232432_1700404	DDB_G0288573	0.477721	-0.948465	1.74865	1.96697	-0.391872	0	0	1	1	0
DDB0232432	1711687	DDB0232432_1711687	DDB_G0288557	0.33322	0.303711	-0.75323	-1.55883	-0.883047	0	0	0	-1	0
DDB0232432	1720458	DDB0232432_1720458	NA	-0.565803	0.173599	-1.94327	-0.491834	-0.273904	0	0	-1	0	0
DDB0232432	1720539	DDB0232432_1720539	NA	0.188929	0.00960691	-1.09772	-0.917487	-0.626558	0	0	-1	0	0
DDB0232432	1731026	DDB0232432_1731026	DDB_G0288595	-0.772416	-1.5984	-0.655587	-1.20788	-0.435138	0	-1	0	-1	0
DDB0232432	1749865	DDB0232432_1749865	NA	-1.59906	-1.61843	1.51735	2.57562	1.62918	0	0	1	1	0
DDB0232432	1768658	DDB0232432_1768658	DDB_G0288631	-0.463854	-0.217047	-1.74773	-1.18338	-0.403861	0	0	-1	-1	0
DDB0232432	1768976	DDB0232432_1768976	DDB_G0288631	-0.0820862	-1.6668	1.24713	0.615695	-0.388769	0	-1	0	0	0
DDB0232432	1779755	DDB0232432_1779755	DDB_G0288647	0.563357	0.055076	0.319033	0.98654	1.58531	0	0	0	0	1
DDB0232432	1796616	DDB0232432_1796616	DDB_G0288667	0.861848	0.413478	0.577797	-1.33627	-0.598999	0	0	0	-1	0
DDB0232432	1836979	DDB0232432_1836979	DDB_G0288695	-2.17594	0.24702	-1.35306	-1.05711	-1.24124	-1	0	-1	-1	-1
DDB0232432	1855363	DDB0232432_1855363	DDB_G0288707	-0.57492	-1.55836	0.844549	-0.644413	-0.386662	0	-1	0	0	0
DDB0232432	1874383	DDB0232432_1874383	DDB_G0288681	0.0311769	0.298502	-0.345819	-0.124433	-1.05611	0	0	0	0	-1
DDB0232432	1923943	DDB0232432_1923943	DDB_G0288755	-2.07912	-1.80349	-3.98864	-1.40245	-0.683464	-1	-1	-1	-1	0
DDB0232432	1986699	DDB0232432_1986699	DDB_G0288803	0.736167	0.856573	-0.313064	-1.31244	-0.392499	0	0	0	-1	0
DDB0232432	2024400	DDB0232432_2024400	DDB_G0288869	0.504805	0.808554	-0.0170936	-0.398537	-1.34142	0	0	0	0	-1
DDB0232432	2025386	DDB0232432_2025386	DDB_G0288817	0.4137	0.716284	-0.659511	-1.03243	0.751864	0	0	0	-1	0
DDB0232432	2045949	DDB0232432_2045949	DDB_G0288833	-0.864492	-0.890488	1.70821	1.64498	-0.136293	0	0	1	0	0
DDB0232432	2052841	DDB0232432_2052841	NA	1.56753	1.67416	-0.549892	0.238158	0.131682	0	1	0	0	0
DDB0232432	2097844	DDB0232432_2097844	DDB_G0288955	1.54553	0.792734	0.620542	-1.33546	-1.24977	1	0	0	0	0
DDB0232432	2114558	DDB0232432_2114558	NA	-0.960833	-1.83021	0.435429	-0.354244	-0.0479238	0	-1	0	0	0
DDB0232432	2121504	DDB0232432_2121504	DDB_G0288919	-0.673589	0.296318	-0.538526	-1.16827	-0.384587	0	0	0	-1	0
DDB0232432	2123711	DDB0232432_2123711	NA	-0.582817	-1.81381	-0.39395	0.958543	0.463048	0	-1	0	0	0
DDB0232432	2193411	DDB0232432_2193411	DDB_G0288975	-2.23912	-1.94998	-2.10706	-1.54143	-0.860838	-1	-1	-1	-1	0
DDB0232432	2194935	DDB0232432_2194935	DDB_G0288975	0.221306	-0.245263	0.264192	-1.65492	-1.00568	0	0	0	-1	-1
DDB0232432	2250783	DDB0232432_2250783	DDB_G0289021	-2.04697	-1.77405	-0.404511	-0.234758	-0.647821	-1	-1	0	0	0
DDB0232432	2259026	DDB0232432_2259026	DDB_G0289031	-1.0201	-1.55232	1.20538	2.04035	1.57716	0	0	0	1	1
DDB0232432	2275837	DDB0232432_2275837	DDB_G0289051	-0.817027	0.153817	-1.30552	-1.25743	-0.0280335	0	0	-1	-1	0
DDB0232432	2276567	DDB0232432_2276567	DDB_G0289051	1.23852	1.06027	0.711981	0.389817	-1.02179	0	0	0	0	-1
DDB0232432	2325089	DDB0232432_2325089	NA	-1.45156	-0.46298	-0.18591	1.5628	1.43624	0	0	0	1	0
DDB0232432	2340196	DDB0232432_2340196	DDB_G0289091	0.546753	0.37263	-0.189376	-0.557832	-1.12781	0	0	0	0	-1
DDB0232432	2364301	DDB0232432_2364301	DDB_G0289105	-0.55971	-0.957012	0.0635616	-1.20225	-0.427943	0	0	0	-1	0
DDB0232432	2389852	DDB0232432_2389852	DDB_G0289133	0.273357	-1.66985	0.772716	0.0966344	-0.521649	0	-1	0	0	0
DDB0232432	2400197	DDB0232432_2400197	DDB_G0289141	-2.02145	-0.734176	-0.884206	-1.35236	-0.619533	-1	0	0	-1	0
DDB0232432	2430562	DDB0232432_2430562	NA	-0.307695	0.21308	-1.81237	-0.983748	-0.705387	0	0	-1	0	0
DDB0232432	2467464	DDB0232432_2467464	DDB_G0289205	-1.32992	-0.816352	-0.419798	-0.545932	-0.604516	-1	0	0	0	0
DDB0232432	2494685	DDB0232432_2494685	DDB_G0289221	0.832592	0.792267	-0.291423	-0.911218	-1.36878	0	0	0	0	-1
DDB0232432	2497095	DDB0232432_2497095	DDB_G0289221	-0.996378	-0.580085	-2.68437	-0.364317	-0.591221	0	0	-1	0	0
DDB0232432	2511718	DDB0232432_2511718	DDB_G0289229	-2.08753	-1.00332	0.304414	-0.310299	-0.129627	-1	-1	0	0	0
DDB0232432	2589633	DDB0232432_2589633	NA	0.588911	1.01848	0.341172	-1.18898	1.43187	0	0	0	-1	0
DDB0232432	2590457	DDB0232432_2590457	DDB_G0295753	-2.06648	-1.00083	0.960565	1.42345	0.829004	-1	-1	0	0	0
DDB0232432	2605188	DDB0232432_2605188	DDB_G0289303	0.928672	0.44289	-1.08856	-1.1894	-0.411554	0	0	-1	-1	0
DDB0232432	2628402	DDB0232432_2628402	NA	1.58253	0.477012	0.451029	-1.08323	-0.449393	1	0	0	0	0
DDB0232432	2693155	DDB0232432_2693155	DDB_G0289331	-0.626206	-1.11665	0.0591887	-1.38729	-0.664116	0	-1	0	-1	0
DDB0232432	2739506	DDB0232432_2739506	DDB_G0289397	-0.572743	-1.69359	0.548068	0.932393	0.229783	0	-1	0	0	0
DDB0232432	2761774	DDB0232432_2761774	DDB_G0289409	-0.299472	-0.221043	0.157234	-1.53715	-0.988125	0	0	0	-1	0
DDB0232432	2791492	DDB0232432_2791492	DDB_G0289393	0.59032	-0.74488	0.267953	-1.33422	-0.596373	0	0	0	-1	0
DDB0232432	2802193	DDB0232432_2802193	NA	-1.22896	-1.07688	0.326128	-0.67113	-0.811123	-1	-1	0	0	0
DDB0232432	2808027	DDB0232432_2808027	DDB_G0289453	-1.57345	-1.61339	2.18635	2.33306	4.75292	-1	-1	1	1	1
DDB0232432	2808030	DDB0232432_2808030	DDB_G0289453	-1.92441	-1.66185	0.788959	1.02141	0.834696	-1	-1	0	0	0
DDB0232432	2821891	DDB0232432_2821891	DDB_G0289467	-2.0911	-1.03229	2.35712	2.38407	4.87661	-1	-1	1	1	1
DDB0232432	2936069	DDB0232432_2936069	NA	-1.13466	-1.34245	0.512038	0.586103	1.07554	-1	-1	0	0	0
DDB0232432	2986844	DDB0232432_2986844	DDB_G0304961	-1.34428	-0.721912	-0.603519	-0.693525	-0.740022	-1	0	0	0	0
DDB0232432	3003039	DDB0232432_3003039	DDB_G0289651	-0.853679	-1.94488	0.111774	-0.750282	-0.854659	0	-1	0	0	0
DDB0232432	3117575	DDB0232432_3117575	DDB_G0289653	0.809687	0.400242	-0.135939	-0.199822	-1.18913	0	0	0	0	-1
DDB0232432	3166362	DDB0232432_3166362	DDB_G0289723	1.10244	2.30636	1.37849	0.486331	-0.373509	0	1	0	0	0
DDB0232432	3169298	DDB0232432_3169298	DDB_G0289725	0.884958	0.859744	0.78567	-1.37836	-0.963895	0	0	0	-1	0
DDB0232432	3176954	DDB0232432_3176954	DDB_G0289731	0.0447082	1.51702	-1.42197	0.377222	-0.0276894	0	1	0	0	0
DDB0232432	3177964	DDB0232432_3177964	DDB_G0289733	0.139736	0.355029	-0.228765	-1.55662	-0.88022	0	0	0	-1	0
DDB0232432	3212686	DDB0232432_3212686	DDB_G0289753	0.463913	0.700732	-2.01636	-0.613072	0.182181	0	0	-1	0	0
DDB0232432	3248903	DDB0232432_3248903	DDB_G0289771	0.217867	-1.6782	0.704115	-1.14116	-0.531767	0	-1	0	-1	0
DDB0232432	3258674	DDB0232432_3258674	DDB_G0289777	1.63256	0.948884	0.684881	-0.803338	-0.649367	1	0	0	0	0
DDB0232432	3269082	DDB0232432_3269082	DDB_G0289781	-2.0373	-0.532152	0.498448	-0.435698	0.885465	-1	0	0	0	0
DDB0232432	3326162	DDB0232432_3326162	DDB_G0289833	-0.566805	-0.780669	-1.98107	-1.23214	0.684586	0	0	-1	-1	0
DDB0232432	3369599	DDB0232432_3369599	DDB_G0289893	-0.671465	-1.72085	0.691769	0.676012	0.411014	0	-1	0	0	0
DDB0232432	3380395	DDB0232432_3380395	DDB_G0289901	-1.6817	-1.70032	1.91327	2.30716	1.98426	0	0	1	1	1
DDB0232432	3408601	DDB0232432_3408601	DDB_G0289911	1.04422	1.5787	0.381568	-0.0028612	-1.14253	0	1	0	0	0
DDB0232432	3477994	DDB0232432_3477994	DDB_G0289941	0.750571	0.719269	1.84234	1.75018	1.6754	0	0	1	1	1
DDB0232432	3550463	DDB0232432_3550463	DDB_G0290021	-0.183644	-0.645019	-0.260094	-1.2507	-0.489788	0	0	0	-1	0
DDB0232432	3577456	DDB0232432_3577456	DDB_G0290035	-0.96035	0.0953766	1.60579	1.69979	1.29398	0	0	1	1	0
DDB0232432	3626148	DDB0232432_3626148	DDB_G0290079	-1.02398	-0.219718	0.326175	-0.339164	-0.426659	-1	0	0	0	0
DDB0232432	3627568	DDB0232432_3627568	DDB_G0290079	-1.99569	-1.72711	-1.84186	-0.522024	-0.59098	-1	-1	-1	0	0
DDB0232432	3635584	DDB0232432_3635584	DDB_G0290097	-0.885523	-0.521842	1.08664	-1.15887	0.284631	0	0	0	-1	0
DDB0232432	3672498	DDB0232432_3672498	DDB_G0290111	-0.96291	0.505207	-0.278265	-1.38103	-0.656118	0	0	0	-1	0
DDB0232432	3706842	DDB0232432_3706842	DDB_G0290141	-1.8603	0.172206	-0.416935	-0.114815	-0.440881	-1	0	0	0	0
DDB0232432	3724172	DDB0232432_3724172	DDB_G0290163	-2.19619	0.0370583	0.207269	-1.50414	-0.813244	-1	0	0	-1	0
DDB0232432	3771056	DDB0232432_3771056	DDB_G0290245	-0.959914	-1.58496	0.321993	0.248532	-0.418865	0	-1	0	0	0
DDB0232432	3899739	DDB0232432_3899739	DDB_G0290293	-0.517596	-1.01216	-0.377139	0.692035	-0.699552	0	-1	0	0	0
DDB0232432	3948807	DDB0232432_3948807	DDB_G0290317	-2.23379	-1.9451	1.16968	0.551241	0.699741	-1	-1	0	0	0
DDB0232432	3949089	DDB0232432_3949089	DDB_G0290317	-0.605026	1.01768	0.636654	-1.15266	-0.572734	0	0	0	-1	0
DDB0232432	3985783	DDB0232432_3985783	DDB_G0290337	1.26001	0.996897	1.48305	1.67625	3.65692	0	0	0	1	1
DDB0232432	4051848	DDB0232432_4051848	NA	-0.302683	0.530403	0.372024	-1.24355	-0.480661	0	0	0	-1	0
DDB0232432	4076632	DDB0232432_4076632	DDB_G0348184	-1.13805	-0.857243	-0.44975	-1.19017	-0.725835	-1	0	0	-1	0
DDB0232432	4091575	DDB0232432_4091575	DDB_G0290467	0.867483	0.95373	0.458607	-1.21487	0.273596	0	0	0	-1	0
DDB0232432	4104588	DDB0232432_4104588	DDB_G0295479	-1.81649	-1.00121	-1.39109	-1.17434	-0.392324	-1	-1	-1	-1	0
DDB0232432	4115300	DDB0232432_4115300	DDB_G0290429	-1.31467	-0.0484825	-1.41653	-0.46729	0.324568	-1	0	-1	0	0
DDB0232432	4219890	DDB0232432_4219890	DDB_G0290529	0.327993	0.408178	0.0141189	-1.21193	-0.0425619	0	0	0	-1	0
DDB0232432	4237411	DDB0232432_4237411	DDB_G0290539	-2.40806	-2.10466	-0.579605	-1.68818	-0.845274	-1	-1	0	-1	0
DDB0232432	4245775	DDB0232432_4245775	DDB_G0290545	-0.574716	-0.292185	-2.05759	-1.04296	-0.432726	0	0	-1	-1	0
DDB0232432	4270532	DDB0232432_4270532	DDB_G0290557	0.434746	0.565012	-0.20331	-1.54841	-0.362804	0	0	0	-1	0
DDB0232432	4340497	DDB0232432_4340497	DDB_G0290673	-1.00341	-1.75366	-0.176378	-0.907158	-0.623133	-1	-1	0	0	0
DDB0232432	4388508	DDB0232432_4388508	DDB_G0290623	1.029	1.64244	0.249546	-0.502486	-0.510216	0	1	0	0	0
DDB0232432	4405812	DDB0232432_4405812	DDB_G0290635	0.305724	0.528379	0.886925	0.221965	-1.09061	0	0	0	0	-1
DDB0232432	4412797	DDB0232432_4412797	DDB_G0290485	-0.431757	-0.668466	-0.846587	-1.53919	-0.857979	0	0	0	-1	0
DDB0232432	4432111	DDB0232432_4432111	DDB_G0290697	-1.01714	-2.1307	-2.30752	-0.762496	-0.743978	-1	-1	-1	0	0
DDB0232432	4490814	DDB0232432_4490814	DDB_G0290721	-1.26235	-0.684933	0.0795303	-1.50839	0.111867	-1	0	0	-1	0
DDB0232432	4525071	DDB0232432_4525071	DDB_G0290737	-0.892237	-1.04837	0.0528104	-0.176021	-0.540551	0	-1	0	0	0
DDB0232432	4559277	DDB0232432_4559277	DDB_G0295661	-2.28584	-1.99276	-0.47475	-1.58201	-0.912627	-1	-1	0	-1	0
DDB0232432	4565910	DDB0232432_4565910	DDB_G0290753	-0.0163664	1.81078	2.31937	3.46724	4.51884	0	1	1	1	1
DDB0232432	4612276	DDB0232432_4612276	DDB_G0290791	0.214688	-1.19947	0.756323	0.624197	-0.463774	0	-1	0	0	0
DDB0232432	4620674	DDB0232432_4620674	DDB_G0290835	0.163782	-0.104759	-2.38601	-0.478277	-0.512885	0	0	-1	0	0
DDB0232432	4634483	DDB0232432_4634483	DDB_G0290815	0.402013	1.00731	-0.154443	0.100426	1.98815	0	0	0	0	1
DDB0232432	4661701	DDB0232432_4661701	NA	1.64435	-0.0441364	1.33536	0.432269	-0.506044	1	0	0	0	0
DDB0232432	4665637	DDB0232432_4665637	DDB_G0290841	-0.602625	0.493724	-0.87445	-1.35807	0.340455	0	0	0	-1	0
DDB0232432	4675326	DDB0232432_4675326	NA	-1.02278	0.343147	-0.419487	0.914168	0.288049	-1	0	0	0	0
DDB0232432	4695313	DDB0232432_4695313	DDB_G0290863	-0.2071	0.172119	-0.273238	-1.76728	-0.677525	0	0	0	-1	0
DDB0232432	4706792	DDB0232432_4706792	DDB_G0290877	0.609193	-1.81733	1.90445	1.04187	-0.219415	0	-1	1	0	0
DDB0232432	4708272	DDB0232432_4708272	DDB_G0290879	0.589618	0.288048	-1.5276	-1.24468	-0.482104	0	0	-1	-1	0
DDB0232432	4713837	DDB0232432_4713837	DDB_G0290897	-0.546001	0.552372	-1.56193	0.78658	-0.031	0	0	-1	0	0
DDB0232432	4744329	DDB0232432_4744329	NA	-1.10618	-0.369663	0.333914	0.544392	-0.412118	-1	0	0	0	0
DDB0232432	4760046	DDB0232432_4760046	DDB_G0290923	1.35337	1.6064	0.860915	-0.359644	0.0162365	0	1	0	0	0
DDB0232432	4798985	DDB0232432_4798985	DDB_G0290955	-1.01765	-0.203206	0.786783	-0.208859	-0.262973	-1	0	0	0	0
DDB0232432	4810891	DDB0232432_4810891	DDB_G0290961	-1.81684	-0.905119	-2.43669	-1.17463	0.296987	-1	0	-1	-1	0
DDB0232432	4825095	DDB0232432_4825095	DDB_G0291047	1.05135	1.0764	0.485856	-0.174428	-1.17317	0	0	0	0	-1
DDB0232432	4842347	DDB0232432_4842347	DDB_G0290977	-0.912689	-0.0578334	-0.606196	-0.978975	-1.3622	0	0	0	0	-1
DDB0232432	4935340	DDB0232432_4935340	DDB_G0291033	-0.198738	-1.20464	0.873987	0.910503	0.523245	0	-1	0	0	0
DDB0232432	4961413	DDB0232432_4961413	DDB_G0291079	-1.79792	-1.81549	-0.000446899	1.5674	0.0789322	0	0	0	1	0
DDB0232432	4962097	DDB0232432_4962097	DDB_G0291079	-3.14967	-3.30692	0.729101	0.965025	0.725627	-1	-1	0	0	0
DDB0232432	4964845	DDB0232432_4964845	DDB_G0291079	-1.01902	-1.66687	0.613038	0.107615	0.523251	-1	-1	0	0	0
DDB0232432	4967215	DDB0232432_4967215	DDB_G0291079	0.118147	-1.21354	1.51885	0.509781	-0.13436	0	0	1	0	0
DDB0232432	4990045	DDB0232432_4990045	DDB_G0291095	3.33404	1.05919	0.344542	0.744122	1.71783	1	0	0	0	0
DDB0232432	5007250	DDB0232432_5007250	DDB_G0291105	-0.756158	-1.56341	1.06432	0.871571	0.373873	0	-1	0	0	0
DDB0232432	5040511	DDB0232432_5040511	DDB_G0291137	-0.837871	0.114815	0.237289	0.490442	-1.21088	0	0	0	0	-1
DDB0232432	5071199	DDB0232432_5071199	DDB_G0291127	-0.434835	0.54831	-0.729246	-1.30238	0.451103	0	0	0	-1	0
DDB0232432	5074252	DDB0232432_5074252	DDB_G0291123	0.269469	0.594441	0.133492	-0.0457398	-1.17293	0	0	0	0	-1
DDB0232432	5086271	DDB0232432_5086271	DDB_G0291191	-0.664583	-0.657992	-1.00558	-0.377334	-0.836065	0	0	-1	0	0
DDB0232432	5123102	DDB0232432_5123102	DDB_G0291205	-0.971829	-1.77188	-0.116332	-1.37247	-0.597431	0	-1	0	-1	0
DDB0232432	5125275	DDB0232432_5125275	NA	0.655196	0.784671	-0.633695	-1.00678	0.558374	0	0	0	-1	0
DDB0232433	867	DDB0232433_867	NA	-0.762865	-0.670999	-0.339972	0.688532	1.83902	0	0	0	0	1
DDB0232433	4403	DDB0232433_4403	DDB_G0291213	0.543944	1.36029	1.1241	2.48659	4.16487	0	0	0	0	1
DDB0232433	4697	DDB0232433_4697	DDB_G0291213	0.384083	0.304322	0.639581	-1.51343	-0.825093	0	0	0	-1	0
DDB0232433	27048	DDB0232433_27048	DDB_G0291263	-2.12941	-1.20392	-1.76048	-1.44613	-0.73921	-1	-1	-1	-1	0
DDB0232433	27431	DDB0232433_27431	DDB_G0291263	-0.72201	-1.5715	-2.80292	-1.18237	-0.402572	0	-1	-1	-1	0
DDB0232433	28784	DDB0232433_28784	NA	0.382189	-1.19576	0.367147	-0.378818	-0.391221	0	-1	0	0	0
DDB0232433	31983	DDB0232433_31983	DDB_G0291251	-0.363431	-1.70425	-0.381423	-0.239619	-0.5633	0	-1	0	0	0
DDB0232433	91778	DDB0232433_91778	DDB_G0291652	-1.80772	-1.55501	-0.156691	0.0754827	-0.382601	-1	-1	0	0	0
DDB0232433	102111	DDB0232433_102111	DDB_G0294555	-0.524011	-1.17651	0.703234	1.12409	-0.449312	0	-1	0	0	0
DDB0232433	107084	DDB0232433_107084	DDB_G0291308	-5.10758	-4.37559	0.286131	0.439244	0.158515	-1	-1	0	0	0
DDB0232433	126767	DDB0232433_126767	DDB_G0291324	-1.00135	-0.756158	0.288299	0.277959	-0.740126	-1	0	0	0	0
DDB0232433	147515	DDB0232433_147515	DDB_G0291229	-0.761584	-0.75664	0.381747	0.892619	2.48026	0	0	0	0	1
DDB0232433	199499	DDB0232433_199499	DDB_G0291372	-0.766677	-0.574855	0.597917	1.77074	-0.319434	0	0	0	1	0
DDB0232433	208060	DDB0232433_208060	DDB_G0291378	-0.432872	-0.897777	0.443519	-1.20073	-0.42601	0	0	0	-1	0
DDB0232433	212853	DDB0232433_212853	DDB_G0291378	0.399781	0.248689	-0.11928	-0.489942	-1.15263	0	0	0	0	-1
DDB0232433	213204	DDB0232433_213204	DDB_G0291378	0.723319	0.266481	-1.50704	-1.39109	-0.668966	0	0	-1	-1	0
DDB0232433	254553	DDB0232433_254553	DDB_G0291396	0.205135	-0.0571208	-0.225468	0.516115	-1.00887	0	0	0	0	-1
DDB0232433	262841	DDB0232433_262841	DDB_G0291406	1.85624	-0.623228	-1.33104	-1.02298	-0.28195	1	0	0	0	0
DDB0232433	292905	DDB0232433_292905	DDB_G0291426	0.0713327	-1.12059	0.169535	-0.292054	-0.271437	0	-1	0	0	0
DDB0232433	301719	DDB0232433_301719	DDB_G0291434	-2.28094	-1.98827	0.165766	-0.251714	-0.907195	-1	-1	0	0	0
DDB0232433	314141	DDB0232433_314141	DDB_G0291245	1.26193	1.50267	0.254066	-0.504026	-1.48026	0	1	0	0	0
DDB0232433	393869	DDB0232433_393869	DDB_G0291243	0.014238	1.69085	0.437658	-0.894432	-0.701037	0	1	0	0	0
DDB0232433	434400	DDB0232433_434400	DDB_G0291253	-1.0905	-0.430464	-0.0190122	0.355812	-0.111922	-1	0	0	0	0
DDB0232433	479292	DDB0232433_479292	DDB_G0291524	2.49248	2.20293	0.0451593	-0.510139	0.75723	1	1	0	0	0
DDB0232433	483192	DDB0232433_483192	DDB_G0291528	-0.272532	-1.84803	-1.94825	-1.44471	-0.737391	0	-1	-1	-1	0
DDB0232433	525671	DDB0232433_525671	DDB_G0291642	-0.191645	-1.03756	0.735844	0.114411	-0.187453	0	-1	0	0	0
DDB0232433	526473	DDB0232433_526473	DDB_G0291644	-0.98455	-1.00946	1.02189	1.90687	-0.644408	0	0	0	1	0
DDB0232433	566342	DDB0232433_566342	DDB_G0291572	1.6246	1.71744	-0.40341	0.28592	-0.657791	1	1	0	0	0
DDB0232433	567710	DDB0232433_567710	NA	-0.257762	1.3704	0.451914	1.88734	3.78095	0	0	0	0	1
DDB0232433	573666	DDB0232433_573666	DDB_G0291582	-0.733065	-2.04785	0.11538	-0.76469	-0.979342	0	-1	0	0	0
DDB0232433	712961	DDB0232433_712961	DDB_G0291730	0.794054	0.61875	1.58602	0.03352	0.588392	0	0	1	0	0
DDB0232433	720839	DDB0232433_720839	DDB_G0291722	-0.044018	0.0202688	0.216331	0.665703	-1.63088	0	0	0	0	-1
DDB0232433	750981	DDB0232433_750981	DDB_G0291792	2.0154	1.07962	1.0919	0.484874	0.208861	1	0	0	0	0
DDB0232433	823045	DDB0232433_823045	DDB_G0291842	1.06564	1.19963	1.2621	1.62064	0.852038	0	0	0	1	0
DDB0232433	866625	DDB0232433_866625	DDB_G0291958	0.597891	-0.759325	-1.94346	-0.361212	0.463755	0	0	-1	0	0
DDB0232433	879373	DDB0232433_879373	DDB_G0291884	0.440565	0.260547	0.278619	-0.711425	-1.48053	0	0	0	0	-1
DDB0232433	894101	DDB0232433_894101	DDB_G0291964	0.901217	1.7675	0.845711	-1.16	-0.0285756	0	1	0	0	0
DDB0232433	894117	DDB0232433_894117	DDB_G0291964	1.01682	0.980637	0.650412	1.32261	2.85169	0	0	0	0	1
DDB0232433	896654	DDB0232433_896654	DDB_G0291964	-1.14619	-0.316616	-0.301476	-0.423934	-0.629913	-1	0	0	0	0
DDB0232433	908773	DDB0232433_908773	DDB_G0291930	-0.76772	-0.533416	-2.22036	-1.26405	-0.506826	0	0	-1	-1	0
DDB0232433	966326	DDB0232433_966326	DDB_G0291968	-1.37988	-0.120918	1.47276	0.836207	2.32877	0	0	0	0	1
DDB0232433	967052	DDB0232433_967052	DDB_G0291968	0.539584	0.424385	1.79588	1.22743	1.93393	0	0	1	0	1
DDB0232433	999971	DDB0232433_999971	DDB_G0292004	-1.20929	-0.571771	-1.72223	-0.344717	-0.608582	-1	0	-1	0	0
DDB0232433	1060701	DDB0232433_1060701	DDB_G0292036	-1.96324	-1.6974	1.49864	1.53963	2.91176	-1	-1	0	1	1
DDB0232433	1079767	DDB0232433_1079767	DDB_G0292046	-0.751479	-0.778494	-1.08825	-0.0585826	2.65195	0	0	0	0	1
DDB0232433	1089800	DDB0232433_1089800	DDB_G0291980	2.52224	2.41364	2.91766	3.3804	3.79779	0	0	1	1	0
DDB0232433	1095870	DDB0232433_1095870	DDB_G0291994	0.429415	-0.482105	0.0628332	-1.30084	-0.553771	0	0	0	-1	0
DDB0232433	1177525	DDB0232433_1177525	DDB_G0292096	-0.996538	0.508228	-1.78404	-0.143553	-0.399267	0	0	-1	0	0
DDB0232433	1182393	DDB0232433_1182393	DDB_G0292098	0.561491	0.825573	0.436139	-1.17765	-0.078777	0	0	0	-1	0
DDB0232433	1189024	DDB0232433_1189024	NA	-0.652524	-0.188107	0.403134	-1.14739	-0.450455	0	0	0	-1	0
DDB0232433	1249446	DDB0232433_1249446	DDB_G0292136	-2.00566	-0.900987	-1.52913	-0.48817	-0.0268336	-1	0	-1	0	0
DDB0232433	1335659	DDB0232433_1335659	DDB_G0292210	-0.438106	-0.36765	-1.27573	-0.751758	-0.547293	0	0	-1	0	0
DDB0232433	1389562	DDB0232433_1389562	DDB_G0292284	0.368504	-2.18226	-0.407085	-1.56942	-0.115231	0	-1	0	-1	0
DDB0232433	1415510	DDB0232433_1415510	DDB_G0292296	0.44284	0.0946842	0.346493	-1.47193	-0.153766	0	0	0	-1	0
DDB0232433	1422917	DDB0232433_1422917	DDB_G0292268	0.145872	-0.569992	-0.502455	-1.28149	-0.529084	0	0	0	-1	0
DDB0232433	1429861	DDB0232433_1429861	DDB_G0292302	1.48284	1.61101	-0.110753	0.961877	-0.655991	0	1	0	0	0
DDB0232433	1436330	DDB0232433_1436330	DDB_G0292304	-0.649115	-1.90751	-0.835173	-0.646377	-0.80941	0	-1	0	0	0
DDB0232433	1477284	DDB0232433_1477284	NA	0.44154	0.413357	-1.95611	0.605085	-0.580386	0	0	-1	0	0
DDB0232433	1616868	DDB0232433_1616868	DDB_G0292528	0.702949	0.672656	0.39359	0.6271	-1.24819	0	0	0	0	-1
DDB0232433	1644833	DDB0232433_1644833	DDB_G0292550	-0.658019	-0.293677	-2.44932	-1.17226	-0.389675	0	0	-1	-1	0
DDB0232433	1663708	DDB0232433_1663708	NA	0.379887	-0.0975827	-0.511008	0.0830253	-1.03851	0	0	0	0	-1
DDB0232433	1675139	DDB0232433_1675139	NA	0.0235578	-1.17621	1.2255	1.45317	2.50555	0	-1	0	0	1
DDB0232433	1699036	DDB0232433_1699036	DDB_G0292476	0.642712	0.995575	0.39744	-1.01178	-0.918814	0	0	0	-1	0
DDB0232433	1743155	DDB0232433_1743155	NA	0.307138	-0.399234	-1.26495	-0.0922843	-0.425428	0	0	-1	0	0
DDB0232433	1783808	DDB0232433_1783808	DDB_G0292714	-1.18969	-1.37794	-0.328203	-0.0950484	-0.882876	-1	-1	0	0	0
DDB0232433	1791110	DDB0232433_1791110	DDB_G0292574	-1.03138	-0.895493	0.265768	0.0478391	1.99703	-1	0	0	0	0
DDB0232433	1883247	DDB0232433_1883247	NA	-0.919127	-0.0520772	-0.583465	-1.60064	0.266059	0	0	0	-1	0
DDB0232433	1929805	DDB0232433_1929805	DDB_G0292674	0.339641	1.23164	1.93983	2.47391	4.71543	0	0	1	1	1
DDB0232433	2040835	DDB0232433_2040835	DDB_G0292768	-1.83593	-1.58083	0.796815	1.00175	1.88475	-1	-1	0	0	0
DDB0232433	2054424	DDB0232433_2054424	DDB_G0292760	-2.35849	-2.05927	-0.347585	0.111385	-0.174418	-1	-1	0	0	0
DDB0232433	2057352	DDB0232433_2057352	DDB_G0292756	-1.92563	-1.66296	-1.95023	-0.240929	-0.513304	-1	-1	-1	0	0
DDB0232433	2060420	DDB0232433_2060420	DDB_G0292736	1.00449	-0.0423122	1.51561	0.970178	0.8316	0	0	1	0	0
DDB0232433	2084082	DDB0232433_2084082	DDB_G0292796	-0.75065	0.00688292	-0.0299123	-0.134794	2.55749	0	0	0	0	1
DDB0232433	2131164	DDB0232433_2131164	DDB_G0292834	-0.156884	1.04214	-1.81768	-0.907565	-0.6815	0	0	-1	0	0
DDB0232433	2137906	DDB0232433_2137906	DDB_G0292840	-1.95756	-1.6922	-0.787287	-0.0864357	0.349679	-1	-1	0	0	0
DDB0232433	2152010	DDB0232433_2152010	DDB_G0292968	-0.20567	-0.269719	0.689347	-1.05072	-0.487731	0	0	0	-1	0
DDB0232433	2202190	DDB0232433_2202190	NA	-1.06223	-0.903632	-0.821478	-0.247509	0.123608	-1	0	0	0	0
DDB0232433	2214268	DDB0232433_2214268	DDB_G0292886	0.432566	0.556292	-0.944734	-0.803342	-1.08169	0	0	0	0	-1
DDB0232433	2231328	DDB0232433_2231328	NA	0.964356	0.925086	0.0742078	-1.23516	0.197816	0	0	0	-1	0
DDB0232433	2257674	DDB0232433_2257674	DDB_G0292948	0.567505	0.585592	2.28529	2.06367	5.04691	0	0	1	1	1
DDB0232433	2258615	DDB0232433_2258615	NA	0.159622	-0.25126	-0.321141	-0.0965503	-1.04769	0	0	0	0	-1
DDB0232433	2315680	DDB0232433_2315680	DDB_G0292988	0.724634	0.810525	-0.323227	-0.074268	-1.29809	0	0	0	0	-1
DDB0232433	2340600	DDB0232433_2340600	DDB_G0293158	0.0466766	0.545476	-0.707972	-1.55184	-0.19145	0	0	0	-1	0
DDB0232433	2357617	DDB0232433_2357617	DDB_G0293164	0.267298	0.0612362	-0.628256	-1.1856	-1.47657	0	0	0	-1	-1
DDB0232433	2379860	DDB0232433_2379860	DDB_G0293042	0.57481	-0.558658	-1.60075	-0.474723	0.463584	0	0	-1	0	0
DDB0232433	2430439	DDB0232433_2430439	DDB_G0293070	-1.88477	0.144416	0.448395	0.13935	-0.468009	-1	0	0	0	0
DDB0232433	2448871	DDB0232433_2448871	DDB_G0293080	0.900307	0.326753	0.436123	0.0851626	-1.11714	0	0	0	0	-1
DDB0232433	2453192	DDB0232433_2453192	DDB_G0293084	0.656121	0.74977	-1.00556	-0.623944	-0.797053	0	0	-1	0	0
DDB0232433	2463397	DDB0232433_2463397	DDB_G0293090	-0.1674	-0.174642	-0.693958	-0.890225	-1.0952	0	0	0	0	-1
DDB0232433	2472648	DDB0232433_2472648	DDB_G0293172	0.636196	0.44319	0.291762	-1.26848	-0.512478	0	0	0	-1	0
DDB0232433	2527090	DDB0232433_2527090	NA	0.325211	0.510848	-0.125542	-1.58857	-0.484659	0	0	0	-1	0
DDB0232433	2533054	DDB0232433_2533054	NA	0.18918	-0.519574	-1.08572	-0.132762	-0.25244	0	0	-1	0	0
DDB0232433	2535246	DDB0232433_2535246	DDB_G0293182	0.151262	-0.575872	-2.25437	-1.23371	1.35389	0	0	-1	-1	0
DDB0232433	2554803	DDB0232433_2554803	DDB_G0293122	-1.94591	-0.694195	-1.32887	-0.417842	-0.0148001	-1	0	-1	0	0
DDB0232433	2596154	DDB0232433_2596154	DDB_G0293270	0.475627	-0.811519	-3.71452	-1.2624	-0.504715	0	0	-1	-1	0
DDB0232433	2597170	DDB0232433_2597170	DDB_G0293270	-0.172953	-0.309033	-0.294107	0.342222	-1.29018	0	0	0	0	-1
DDB0232433	2597233	DDB0232433_2597233	DDB_G0295423	0.582441	1.16887	1.36079	2.28166	3.62146	0	0	0	0	1
DDB0232433	2598533	DDB0232433_2598533	DDB_G0295421	-1.08893	0.0994056	0.300042	0.349508	-0.878075	-1	0	0	0	0
DDB0232433	2622903	DDB0232433_2622903	DDB_G0293192	-0.331605	-0.114589	-1.19834	-0.337394	-1.38556	0	0	-1	0	-1
DDB0232433	2703031	DDB0232433_2703031	DDB_G0293276	-0.947403	-1.5892	-0.293414	-1.19915	-0.423994	0	-1	0	-1	0
DDB0232433	2704121	DDB0232433_2704121	DDB_G0293276	-1.25878	-0.527587	-0.496911	-1.20226	0.075433	-1	0	0	-1	0
DDB0232433	2715705	DDB0232433_2715705	DDB_G0293206	-0.881811	-1.72053	-0.0579908	1.09098	-0.583015	0	-1	0	0	0
DDB0232433	2738133	DDB0232433_2738133	DDB_G0293302	0.553566	-0.473208	-0.204371	-0.416964	-1.2649	0	0	0	0	-1
DDB0232433	2745710	DDB0232433_2745710	DDB_G0293308	0.191702	-1.21573	0.37717	-0.316365	-1.2479	0	-1	0	0	-1
DDB0232433	2770345	DDB0232433_2770345	DDB_G0295411	-1.12055	0.13195	-1.16568	-1.34674	-0.0731029	-1	0	-1	-1	0
DDB0232433	2784992	DDB0232433_2784992	DDB_G0293354	-0.491978	-0.448615	-0.536969	-1.30033	-0.55312	0	0	0	-1	0
DDB0232433	2826352	DDB0232433_2826352	DDB_G0293384	0.24808	-1.12596	-0.461228	-0.408008	-0.878285	0	-1	0	0	0
DDB0232433	2838552	DDB0232433_2838552	NA	-0.322187	-1.9217	-0.541421	-0.620317	-0.826599	0	-1	0	0	0
DDB0232433	2839809	DDB0232433_2839809	DDB_G0293400	0.770062	0.859751	0.140535	0.865869	-1.37464	0	0	0	0	-1
DDB0232433	2868713	DDB0232433_2868713	DDB_G0293424	-1.92053	-0.782442	0.279333	0.697559	0.412536	-1	0	0	0	0
DDB0232433	2898209	DDB0232433_2898209	DDB_G0293440	-2.21102	-1.92426	-0.463051	-0.569496	-0.829689	-1	-1	0	0	0
DDB0232433	2903217	DDB0232433_2903217	DDB_G0293444	-1.92399	-1.66146	-0.757011	-0.478269	-0.51149	-1	-1	0	0	0
DDB0232433	2923557	DDB0232433_2923557	DDB_G0293468	-1.8942	-1.63418	-0.951629	-0.42005	-0.478467	-1	-1	0	0	0
DDB0232433	2993764	DDB0232433_2993764	DDB_G0293544	-0.79508	-0.613481	-0.228043	-1.21029	-0.438213	0	0	0	-1	0
DDB0232433	3068632	DDB0232433_3068632	DDB_G0295359	0.292173	0.662074	0.333899	0.647878	1.97014	0	0	0	0	1
DDB0232433	3078334	DDB0232433_3078334	NA	-0.515479	-1.0969	-0.88081	-1.17064	-0.387609	0	-1	0	-1	0
DDB0232433	3098505	DDB0232433_3098505	DDB_G0293590	2.48816	2.61023	1.20053	1.822	0.52808	1	1	0	1	0
DDB0232433	3137296	DDB0232433_3137296	NA	0.553997	-1.12877	-0.215973	0.429707	-0.382011	0	-1	0	0	0
DDB0232433	3141369	DDB0232433_3141369	DDB_G0295365	-0.117044	0.434946	-2.20076	0.664238	0.175959	0	0	-1	0	0
DDB0232433	3156679	DDB0232433_3156679	DDB_G0293730	0.00671597	-1.03112	0.188422	0.50356	-0.782542	0	-1	0	0	0
DDB0232433	3174449	DDB0232433_3174449	NA	-0.637608	-1.71168	-0.0779622	-0.23393	-0.572304	0	-1	0	0	0
DDB0232433	3177515	DDB0232433_3177515	DDB_G0293630	0.260575	0.542702	-0.116413	-1.67355	-1.02945	0	0	0	-1	-1
DDB0232433	3235639	DDB0232433_3235639	DDB_G0293666	-1.43103	0.077813	0.205893	-1.29185	-0.542309	-1	0	0	-1	0
DDB0232433	3248329	DDB0232433_3248329	DDB_G0293678	0.760642	0.805752	1.42928	2.05861	3.18484	0	0	0	1	1
DDB0232433	3266644	DDB0232433_3266644	DDB_G0293746	-0.0832073	-1.99158	-0.670361	-0.657551	-0.027641	0	-1	0	0	0
DDB0232433	3279041	DDB0232433_3279041	DDB_G0293752	-0.299348	0.769454	0.423222	-1.17801	0.0269939	0	0	0	-1	0
DDB0232433	3295282	DDB0232433_3295282	DDB_G0293762	0.573174	0.718006	-0.0459317	-1.14516	0.446001	0	0	0	-1	0
DDB0232433	3349687	DDB0232433_3349687	DDB_G0293826	0.831144	-0.57315	0.906293	-1.12634	-0.416649	0	0	0	-1	0
DDB0232433	3494039	DDB0232433_3494039	DDB_G0293900	0.0902462	0.969623	-1.46295	-1.30838	-0.563403	0	0	-1	-1	0
DDB0232433	3518992	DDB0232433_3518992	DDB_G0293980	0.19894	-0.150183	0.948772	1.82179	3.6234	0	0	0	1	1
DDB0232433	3602047	DDB0232433_3602047	DDB_G0294002	-0.0740487	1.06078	-0.122505	1.73698	2.40794	0	0	0	0	1
DDB0237465	8209	DDB0237465_8209	DDB_G0295643	-1.88354	-1.03132	0.261198	-0.0585897	-0.46665	-1	-1	0	0	0
DDB0237465	62792	DDB0237465_62792	NA	0.1162	-0.996755	-0.666651	-1.44124	-0.00988896	0	0	0	-1	0
DDB0237465	64993	DDB0237465_64993	NA	-2.33933	-1.13598	-2.09091	-1.88798	-1.39994	-1	-1	-1	-1	-1
DDB0237465	70283	DDB0237465_70283	NA	0.218551	-1.60948	0.419454	-1.2184	-0.448555	0	-1	0	-1	0
DDB0237465	71704	DDB0237465_71704	DDB_G0295649	-0.4607	-1.65511	-1.63413	-0.286961	0.136598	0	-1	-1	0	0
DDB0237465	71778	DDB0237465_71778	DDB_G0295649	-1.84462	-0.769271	1.66827	1.81427	2.297	-1	0	1	1	1
DDB0237465	72236	DDB0237465_72236	DDB_G0295649	1.39584	1.36237	-1.15605	-1.20549	-0.51767	0	0	-1	-1	0
DDB0237465	72251	DDB0237465_72251	DDB_G0295649	-1.03196	-0.877002	-0.0103957	-0.453076	0.180807	-1	0	0	0	0
DDB0237465	72707	DDB0237465_72707	DDB_G0295649	0.416374	0.443977	-1.03273	-0.285266	0.0677608	0	0	-1	0	0
DDB0232428	1567472	DDB0232428_1567472	DDB_G0268578	3.03291	3.71086	1.4484	0.744122	1.09664	0	1	0	0	0
DDB0232428	4872372	DDB0232428_4872372	DDB_G0270434	3.33311	2.08737	0.344542	0.744122	1.09664	1	0	0	0	0
DDB0232429	104102	DDB0232429_104102	NA	1.46986	3.07947	2.04206	0.849769	1.72541	0	1	0	0	0
DDB0232429	722884	DDB0232429_722884	DDB_G0271750	1.36127	1.28267	3.6877	3.63981	4.02966	0	0	1	0	1
DDB0232430	3499103	DDB0232430_3499103	NA	2.79807	1.02031	3.15972	3.57036	2.86434	0	0	1	0	0
DDB0232430	4436906	DDB0232430_4436906	DDB_G0281407	3.36101	2.70872	1.48694	2.08091	1.09664	1	0	0	0	0
DDB0232430	6122524	DDB0232430_6122524	DDB_G0282373	3.25201	3.12387	0.344542	0.744122	1.09664	1	1	0	0	0
DDB0232431	2629576	DDB0232431_2629576	DDB_G0284869	2.88388	3.7334	1.92962	1.6239	1.09664	0	1	0	0	0
DDB0232432	4313250	DDB0232432_4313250	DDB_G0290665	2.71904	3.00307	0.344542	0.744122	1.09664	0	1	0	0	0
DDB0232428	4223056	DDB0232428_4223056	DDB_G0270102	0.543944	0.505239	2.8661	3.52386	3.0978	0	0	0	1	0
DDB0232432	1794865	DDB0232432_1794865	DDB_G0288665	0.543944	0.505239	2.67994	3.94628	5.10047	0	0	0	1	1
