# Supplementary material for: Mutant resources for functional genomics in Dictyostelium discoideum using REMI-seq technology
Source: BMC Biol. 2021 Aug 24;19:172. doi: 10.1186/s12915-021-01108-y (PMC8386026; doi:10.1186/s12915-021-01108-y)
Supplement: Supplementary file 13 — Additional file 13. Differential gene expression analysis on axenic vs bacterial growth [file 12915_2021_1108_MOESM13_ESM.xlsx]

## Sheet: HL5_Ka_expression_all
Gene	baseMean	log2FoldChange	lfcSE	stat	pvalue	padj	KA_1	KA_2	KA_mean	AX4_veg_1	AX4_veg_2	AX4_veg_3	AX_mean
DDB_G0267178	75.6476	11.6124	1.69347	6.85716	7.02e-12	5.77e-11	57.2979	320.94	189.119	0	0	0	0
DDB_G0267180	72.4594	11.5502	1.57394	7.33842	2.16e-13	2.05e-12	72.9245	289.372	181.148	0	0	0	0
DDB_G0267182	184.643	12.8998	1.35804	9.49881	2.12e-21	3.85e-20	276.071	647.142	461.607	0	0	0	0
DDB_G0267184	113.225	12.1942	1.29204	9.43793	3.8e-21	6.76e-20	208.356	357.769	283.063	0	0	0	0
DDB_G0267186	5.24035	7.76064	2.05764	3.77161	0.000162194	0.000514603	10.4178	15.7839	13.1009	0	0	0	0
DDB_G0267188	88.0651	11.8316	1.30257	9.08326	1.05e-19	1.67e-18	161.476	278.85	220.163	0	0	0	0
DDB_G0267190	0	NA	NA	NA	NA	NA	0	0	0	0	0	0	0
DDB_G0267194	5.21938	7.75583	2.37523	3.2653	0.00109347	0.00290837	20.8356	5.26131	13.0484	0	0	0	0
DDB_G0267196	0	NA	NA	NA	NA	NA	0	0	0	0	0	0	0
DDB_G0267198	5.26131	7.76631	4.37559	1.77492	0.0759113	0.123931	0	26.3066	13.1533	0	0	0	0
DDB_G0267202	0	NA	NA	NA	NA	NA	0	0	0	0	0	0	0
DDB_G0267204	2.09404	6.43756	2.87231	2.24125	0.02501	0.0472869	5.2089	5.26131	5.23511	0	0	0	0
DDB_G0267206	92.5823	10.0263	1.50102	6.67969	2.39e-11	1.87e-10	78.1334	384.076	231.105	0	0	0.701931	0.233977
DDB_G0267208	68.2189	11.4632	1.46357	7.83231	4.79e-15	5.23e-14	88.5512	252.543	170.547	0	0	0	0
DDB_G0267210	216.148	13.1271	1.37404	9.55367	1.25e-21	2.32e-20	307.325	773.413	540.369	0	0	0	0
DDB_G0267212	4.25439	6.49164	2.91622	2.22605	0.0260111	0.0488948	0	21.0453	10.5226	0.226714	0	0	0.0755713
DDB_G0267216	1.05226	5.44259	4.56113	1.19325	0.23277	0.305271	0	5.26131	2.63066	0	0	0	0
DDB_G0267218	0	NA	NA	NA	NA	NA	0	0	0	0	0	0	0
DDB_G0267220	0	NA	NA	NA	NA	NA	0	0	0	0	0	0	0
DDB_G0267222	0	NA	NA	NA	NA	NA	0	0	0	0	0	0	0
DDB_G0267224	0	NA	NA	NA	NA	NA	0	0	0	0	0	0	0
DDB_G0267226	0	NA	NA	NA	NA	NA	0	0	0	0	0	0	0
DDB_G0267228	0	NA	NA	NA	NA	NA	0	0	0	0	0	0	0
DDB_G0267230	1.04178	5.43537	4.56169	1.19152	0.233448	0.305271	5.2089	0	2.60445	0	0	0	0
DDB_G0267236	216.864	13.1318	1.2253	10.7173	8.44e-27	2.14e-25	474.01	610.312	542.161	0	0	0	0
DDB_G0267238	90.2744	11.8674	1.47564	8.04216	8.83e-16	1.04e-14	109.387	341.985	225.686	0	0	0	0
DDB_G0267240	283.696	13.5196	1.20485	11.2209	3.22e-29	9.42e-28	729.245	689.232	709.239	0	0	0	0
DDB_G0267242	73.4173	11.5691	1.35782	8.52032	1.59e-17	2.16e-16	119.805	247.282	183.543	0	0	0	0
DDB_G0267244	148.076	12.5814	1.53705	8.18541	2.71e-16	3.3e-15	145.849	594.529	370.189	0	0	0	0
DDB_G0267246	84.9188	11.7791	1.30276	9.04163	1.54e-19	2.42e-18	156.267	268.327	212.297	0	0	0	0
DDB_G0267248	27.3169	10.1427	1.83711	5.52102	3.37e-08	1.87e-07	20.8356	115.749	68.2923	0	0	0	0
DDB_G0267250	0	NA	NA	NA	NA	NA	0	0	0	0	0	0	0
DDB_G0267252	2.09404	6.43756	2.87231	2.24125	0.02501	0.0472869	5.2089	5.26131	5.23511	0	0	0	0
DDB_G0267254	2.09404	6.43756	2.87231	2.24125	0.02501	0.0472869	5.2089	5.26131	5.23511	0	0	0	0
DDB_G0267258	226.67	13.1957	1.39175	9.48134	2.51e-21	4.51e-20	307.325	826.026	566.676	0	0	0	0
DDB_G0267260	51.4246	11.0554	1.48033	7.46822	8.13e-14	7.99e-13	67.7156	189.407	128.561	0	0	0	0
DDB_G0267262	87.9917	11.8304	1.24373	9.51204	1.87e-21	3.42e-20	197.938	242.02	219.979	0	0	0	0
DDB_G0267264	43.017	10.7978	1.451	7.44166	9.94e-14	9.7e-13	62.5067	152.578	107.542	0	0	0	0
DDB_G0267270	2.08356	6.43089	4.44712	1.44608	0.148155	0.215857	10.4178	0	5.2089	0	0	0	0
DDB_G0267272	23.1078	9.90123	1.79119	5.52773	3.24e-08	1.8e-07	20.8356	94.7037	57.7696	0	0	0	0
DDB_G0267274	0	NA	NA	NA	NA	NA	0	0	0	0	0	0	0
DDB_G0267278	0	NA	NA	NA	NA	NA	0	0	0	0	0	0	0
DDB_G0267280	0	NA	NA	NA	NA	NA	0	0	0	0	0	0	0
DDB_G0267282	23.1078	9.90123	1.79119	5.52773	3.24e-08	1.8e-07	20.8356	94.7037	57.7696	0	0	0	0
DDB_G0267286	0	NA	NA	NA	NA	NA	0	0	0	0	0	0	0
DDB_G0267292	210.907	13.0917	1.37858	9.49651	2.17e-21	3.93e-20	296.907	757.629	527.268	0	0	0	0
DDB_G0267294	406.936	14.0399	1.30974	10.7196	8.23e-27	2.09e-25	666.739	1367.94	1017.34	0	0	0	0
DDB_G0267296	1.05226	5.44259	4.56113	1.19325	0.23277	0.305271	0	5.26131	2.63066	0	0	0	0
DDB_G0267298	0	NA	NA	NA	NA	NA	0	0	0	0	0	0	0
DDB_G0267300	162.472	12.7152	1.26723	10.0338	1.08e-23	2.26e-22	312.534	499.825	406.179	0	0	0	0
DDB_G0267302	0	NA	NA	NA	NA	NA	0	0	0	0	0	0	0
DDB_G0267304	192.851	12.9625	1.25594	10.321	5.67e-25	1.3e-23	380.249	584.006	482.128	0	0	0	0
DDB_G0267306	335.784	13.7628	1.23665	11.1291	9.05e-29	2.6e-27	989.69	689.232	839.461	0	0	0	0
DDB_G0267308	88.1385	11.8328	1.40804	8.40372	4.33e-17	5.68e-16	125.013	315.679	220.346	0	0	0	0
DDB_G0267310	86.929	11.813	1.23862	9.53719	1.47e-21	2.7e-20	203.147	231.498	217.322	0	0	0	0
DDB_G0267314	40.9544	10.727	1.62994	6.5812	4.67e-11	3.51e-10	41.6712	163.101	102.386	0	0	0	0
DDB_G0267322	12.6167	9.02813	2.34554	3.84907	0.000118567	0.000388121	5.2089	57.8745	31.5417	0	0	0	0
DDB_G0267324	88.2014	11.8339	1.53468	7.71096	1.25e-14	1.31e-13	93.7601	347.247	220.503	0	0	0	0
DDB_G0267326	203.216	13.0381	1.21983	10.6884	1.15e-26	2.91e-25	458.383	557.699	508.041	0	0	0	0
DDB_G0267328	223.958	13.1785	1.21635	10.8344	2.36e-27	6.24e-26	609.441	510.348	559.894	0	0	0	0
DDB_G0267330	102.933	12.0567	1.59059	7.58004	3.45e-14	3.51e-13	93.7601	420.905	257.333	0	0	0	0
DDB_G0267332	0	NA	NA	NA	NA	NA	0	0	0	0	0	0	0
DDB_G0267334	10.5017	8.76329	1.99274	4.39761	1.09e-05	4.29e-05	10.4178	42.0905	26.2542	0	0	0	0
DDB_G0267336	0	NA	NA	NA	NA	NA	0	0	0	0	0	0	0
DDB_G0267338	12.5957	9.02563	1.79636	5.0244	5.05e-07	2.4e-06	15.6267	47.3518	31.4893	0	0	0	0
DDB_G0267342	251.495	13.3456	1.23721	10.7868	3.97e-27	1.03e-25	520.89	736.584	628.737	0	0	0	0
DDB_G0267344	0	NA	NA	NA	NA	NA	0	0	0	0	0	0	0
DDB_G0267346	0	NA	NA	NA	NA	NA	0	0	0	0	0	0	0
DDB_G0267348	0	NA	NA	NA	NA	NA	0	0	0	0	0	0	0
DDB_G0267350	0	NA	NA	NA	NA	NA	0	0	0	0	0	0	0
DDB_G0267352	0	NA	NA	NA	NA	NA	0	0	0	0	0	0	0
DDB_G0267354	51.1206	11.0473	1.75891	6.28079	3.37e-10	2.33e-09	218.774	36.8292	127.801	0	0	0	0
DDB_G0267356	1528.95	15.9497	1.24817	12.7784	2.16e-37	9.26e-36	4698.42	2946.34	3822.38	0	0	0	0
DDB_G0267358	927.709	15.2288	1.25434	12.1409	6.42e-34	2.3e-32	1760.61	2877.94	2319.27	0	0	0	0
DDB_G0267362	1174.02	15.5686	1.27952	12.1675	4.63e-34	1.69e-32	3812.91	2057.17	2935.04	0	0	0	0
DDB_G0267364	339.707	13.7794	1.2796	10.7685	4.85e-27	1.25e-25	609.441	1089.09	849.266	0	0	0	0
DDB_G0267366	1420.13	14.8809	1.22562	12.1415	6.36e-34	2.29e-32	2859.68	4240.62	3550.15	0	0	0.350966	0.116989
DDB_G0267370	7.33439	8.24573	1.80482	4.56872	4.91e-06	2.04e-05	15.6267	21.0453	18.336	0	0	0	0
DDB_G0267372	0	NA	NA	NA	NA	NA	0	0	0	0	0	0	0
DDB_G0267374	693.261	-0.650767	0.402638	-1.61626	0.106038	0.165552	317.743	715.539	516.641	762.212	843.937	826.875	811.008
DDB_G0267376	489.807	0.0505569	0.141677	0.356846	0.721207	0.775685	479.218	520.87	500.044	472.018	488.033	488.895	482.982
DDB_G0267378	1.05226	5.44259	4.56113	1.19325	0.23277	0.305271	0	5.26131	2.63066	0	0	0	0
DDB_G0267380	6243.33	1.0049	0.353127	2.84572	0.00443112	0.01031	6083.99	11780.1	8932.04	4361.29	4772.67	4218.61	4450.86
DDB_G0267382	11567.6	1.40566	0.269087	5.22383	1.75e-07	8.94e-07	14611	22318.5	18464.7	6109.03	7381.89	7417.66	6969.53
DDB_G0267384	114.823	-0.75358	0.590954	-1.27519	0.202241	0.281647	31.2534	131.533	81.3931	139.882	143.696	127.752	137.11
DDB_G0267386	4658.48	1.20663	0.357391	3.37623	0.000734875	0.00202434	9313.51	4803.58	7058.54	2770.22	3223.6	3181.5	3058.44
DDB_G0267388	130.889	-1.20528	0.320614	-3.75928	0.000170401	0.0005383	72.9245	73.6584	73.2915	157.793	181.956	168.113	169.287
DDB_G0267390	983.373	2.99424	0.424345	7.05614	1.71e-12	1.49e-11	2885.73	1252.19	2068.96	272.057	259.81	247.08	259.649
DDB_G0267392	91.2444	-4.82772	1.03542	-4.66257	3.12e-06	1.34e-05	0	10.5226	5.26131	150.085	140.137	155.478	148.567
DDB_G0267394	313.662	0.619491	0.847479	0.730981	0.464791	0.542264	88.5512	705.016	396.784	240.77	276.715	257.258	258.248
DDB_G0267396	10.1635	-2.54583	1.54884	-1.6437	0.100238	0.157185	0	5.26131	2.63066	19.9508	11.5669	14.0386	15.1854
DDB_G0267398	114.059	5.34382	0.409321	13.0553	5.92e-39	2.77e-37	213.565	336.724	275.144	8.1617	6.22832	5.61545	6.66849
DDB_G0267400	7829.31	-0.431699	0.393063	-1.09829	0.272076	0.348114	4125.45	8823.22	6474.33	8202.96	9324.68	8670.26	8732.63
DDB_G0267402	6967.29	3.32246	0.621743	5.34378	9.1e-08	4.79e-07	24122.4	6171.52	15147	1361.64	1618.03	1562.85	1514.17
DDB_G0267404	187.085	-1.55532	0.400994	-3.87866	0.000105032	0.000346177	46.8801	126.272	86.5758	270.923	252.692	238.657	254.09
DDB_G0267406	471.984	-0.300284	0.473581	-0.634071	0.526035	0.602258	223.983	605.051	414.517	534.138	493.817	502.934	510.296
DDB_G0267408	267.664	1.31325	0.562057	2.33651	0.0194647	0.0382298	192.729	641.88	417.305	164.368	167.72	171.622	167.903
DDB_G0267410	153.932	0.254534	0.49034	0.519097	0.603693	0.672408	88.5512	252.543	170.547	150.085	132.129	146.353	142.856
DDB_G0267412	14.0251	3.75782	0.755697	4.97266	6.6e-07	3.11e-06	26.0445	36.8292	31.4368	1.587	3.55904	2.10579	2.41728
DDB_G0267414	218.029	0.693619	0.212267	3.26768	0.00108434	0.00289036	312.534	252.543	282.538	167.088	189.519	168.464	175.023
DDB_G0267416	450.565	-3.85098	0.349414	-11.0212	3.02e-28	8.33e-27	36.4623	63.1358	49.799	722.764	734.497	695.965	717.742
DDB_G0267418	24454.1	1.69522	0.300803	5.63563	1.74e-08	9.97e-08	50984.7	32578.1	41781.4	10676.6	13566.6	14464.7	12902.6
DDB_G0267420	1647.79	2.07613	0.353658	5.87043	4.35e-09	2.68e-08	2052.3	4024.91	3038.61	719.136	717.147	725.446	720.576
DDB_G0267422	270.64	1.39513	0.511439	2.72785	0.00637495	0.0141891	640.694	220.975	430.835	158.7	160.157	172.675	163.844
DDB_G0267424	224.177	2.04894	0.215952	9.48791	2.36e-21	4.26e-20	416.712	405.121	410.916	87.0581	108.106	103.886	99.6833
DDB_G0267426	1678.23	3.5508	0.211373	16.7988	2.49e-63	2.33e-61	3245.14	4193.27	3719.2	279.538	324.318	348.86	317.572
DDB_G0267428	54.775	0.116032	0.768667	0.150952	0.880013	0.907642	98.969	15.7839	57.3765	41.0352	62.2832	55.8035	53.0406
DDB_G0267430	49.5854	-2.49902	0.710787	-3.51585	0.00043835	0.00126862	10.4178	15.7839	13.1009	73.4553	62.2832	85.9866	73.9084
DDB_G0267432	510.372	-2.38867	0.29999	-7.96249	1.69e-15	1.92e-14	93.7601	194.669	144.214	751.33	743.839	768.264	754.478
DDB_G0267434	0	NA	NA	NA	NA	NA	0	0	0	0	0	0	0
DDB_G0267436	1571.04	-2.25234	0.270722	-8.31974	8.82e-17	1.13e-15	359.414	605.051	482.232	2373.01	2332.95	2184.76	2296.91
DDB_G0267438	418.055	-1.36766	0.3493	-3.91544	9.02e-05	0.000301833	229.191	199.93	214.561	489.702	450.219	721.234	553.718
DDB_G0267440	15.8188	-0.421592	0.790405	-0.533387	0.593766	0.662963	10.4178	15.7839	13.1009	13.1494	18.685	21.0579	17.6308
DDB_G0267442	85.2932	1.32199	0.426067	3.10278	0.00191714	0.00482915	187.52	78.9197	133.22	52.8243	55.61	51.592	53.3421
DDB_G0267444	1070.93	-0.377719	0.143839	-2.62598	0.00863997	0.0185325	958.437	857.594	908.016	1209.97	1098.85	1229.78	1179.54
DDB_G0267446	38.6163	0.662916	0.685315	0.967316	0.333386	0.412408	83.3423	15.7839	49.5631	33.1002	28.9172	31.9379	31.3184
DDB_G0267448	146.949	-0.68551	0.728943	-0.940417	0.347004	0.425723	31.2534	184.146	107.7	166.181	158.377	194.786	173.115
DDB_G0267450	1006.42	0.564685	0.353874	1.59572	0.110551	0.171207	1651.22	847.072	1249.15	849.723	786.993	897.068	844.595
DDB_G0267452	3003.74	1.88503	0.580187	3.249	0.00115812	0.00305601	8313.4	2367.59	5340.49	1434.19	1497.91	1405.62	1445.91
DDB_G0267454	30592.8	1.79992	0.318764	5.64658	1.64e-08	9.38e-08	68601.2	38307.6	53454.4	14491.5	16013.9	15549.5	15351.7
DDB_G0267456	955.784	-0.768077	0.258371	-2.97276	0.00295132	0.00712058	786.543	557.699	672.121	1019.76	1088.62	1326.3	1144.89
DDB_G0267458	693.766	3.04558	0.139981	21.7572	5.91e-105	1.19e-102	1468.91	1467.91	1468.41	189.306	163.716	178.992	177.338
DDB_G0267460	148.181	1.95753	0.265116	7.38366	1.54e-13	1.48e-12	208.356	326.201	267.279	68.6943	68.5115	69.1402	68.782
DDB_G0267462	231.761	-3.00175	0.465689	-6.44581	1.15e-10	8.32e-10	20.8356	68.3971	44.6163	417.153	320.758	331.663	356.525
DDB_G0267464	200.47	-0.44522	0.292987	-1.51959	0.128614	0.193649	213.565	115.749	164.657	221.046	217.546	234.445	224.346
DDB_G0267466	13.8668	6.64217	1.2937	5.13424	2.83e-07	1.4e-06	20.8356	47.3518	34.0937	0	0.44488	0.701931	0.38227
DDB_G0267468	230.597	0.817285	0.245553	3.32834	0.000873646	0.00237578	270.863	352.508	311.685	192.48	153.928	183.204	176.538
DDB_G0267470	482.037	-0.376245	0.344317	-1.09273	0.274513	0.35035	276.071	541.915	408.993	504.665	523.179	564.353	530.732
DDB_G0267472	540.294	1.06743	0.250225	4.26586	1.99e-05	7.45e-05	937.601	636.619	787.11	342.338	371.475	413.438	375.75
DDB_G0267474	5.22986	7.75839	2.05563	3.77422	0.000160506	0.000511747	15.6267	10.5226	13.0747	0	0	0	0
DDB_G0267476	7.17978	0.232246	0.988968	0.234837	0.814335	0.855083	10.4178	5.26131	7.83955	5.89456	8.00784	6.31738	6.73993
DDB_G0267480	497.468	-2.3193	0.226496	-10.2399	1.31e-24	2.92e-23	161.476	131.533	146.504	750.876	747.843	695.614	731.444
DDB_G0267482	62.2425	-2.57036	0.625783	-4.10743	4e-05	0.000142413	20.8356	10.5226	15.6791	95.8999	98.3185	85.6356	93.2847
DDB_G0267484	25.6936	1.76947	0.491526	3.59995	0.00031828	0.000948736	31.2534	57.8745	44.5639	12.4693	14.2362	12.6348	13.1134
DDB_G0267486	53.0826	-4.01855	1.09701	-3.66319	0.000249091	0.000761415	0	10.5226	5.26131	84.3375	106.326	64.2267	84.9635
DDB_G0267488	32.1159	-1.1738	0.635057	-1.84834	0.0645531	0.108206	20.8356	15.7839	18.3098	44.8893	45.3778	33.6927	41.3199
DDB_G0267490	60.7108	-0.935001	0.449444	-2.08035	0.0374934	0.0674796	26.0445	52.6131	39.3288	77.5361	66.2871	81.0731	74.9654
DDB_G0267492	854.012	1.13056	0.427606	2.64394	0.00819481	0.0176703	1776.23	757.629	1266.93	550.688	603.257	582.252	578.732
DDB_G0267494	8.31807	-3.85644	1.59678	-2.41514	0.0157292	0.0316701	0	0	0	18.8172	9.78736	12.9857	13.8634
DDB_G0267496	1196.87	-0.83638	0.22092	-3.78589	0.000153162	0.0004926	953.228	673.448	813.338	1378.65	1395.14	1583.91	1452.57
DDB_G0267498	13.4422	-0.547124	1.06583	-0.513332	0.607719	0.675937	5.2089	15.7839	10.4964	6.80141	20.4645	18.9521	15.406
DDB_G0267500	169.896	-2.50991	0.396118	-6.33627	2.35e-10	1.65e-09	46.8801	42.0905	44.4853	237.369	242.015	281.124	253.503
DDB_G0267502	218.895	-0.62927	0.221467	-2.84137	0.00449206	0.0104364	166.685	163.101	164.893	264.802	254.916	244.974	254.897
DDB_G0267504	151.035	-0.155226	0.247697	-0.626676	0.530872	0.606789	145.849	136.794	141.322	149.858	155.263	167.411	157.511
DDB_G0267506	4.44012	4.72191	2.05206	2.30106	0.0213881	0.0415929	0	21.0453	10.5226	0.453428	0	0.701931	0.38512
DDB_G0267508	71.8983	2.61347	0.5792	4.5122	6.42e-06	2.62e-05	67.7156	220.975	144.345	21.7645	24.4684	24.5676	23.6002
DDB_G0267510	16.6784	-3.32075	1.53772	-2.15953	0.0308089	0.0567724	5.2089	0	2.60445	29.2461	17.3503	31.5869	26.0611
DDB_G0267512	104.621	-1.50279	0.455188	-3.30148	0.000961774	0.00259118	20.8356	78.9197	49.8776	134.895	142.806	145.651	141.117
DDB_G0267514	1006.8	1.09063	0.317043	3.44	0.000581707	0.00164638	1901.25	1052.26	1476.75	683.315	708.249	688.946	693.503
DDB_G0267516	220.773	-1.46405	0.30302	-4.83152	1.35e-06	6.09e-06	109.387	105.226	107.307	256.413	326.097	306.744	296.418
DDB_G0267522	11.3406	-4.29418	1.49524	-2.87191	0.00408004	0.0095698	0	0	0	18.3638	18.685	19.6541	18.901
DDB_G0267524	623.29	2.66657	0.63994	4.1669	3.09e-05	0.000112111	2026.26	494.564	1260.41	184.545	203.31	207.772	198.542
DDB_G0267526	61.7626	-4.24791	1.04891	-4.04982	5.13e-05	0.000178476	5.2089	5.26131	5.23511	105.422	105.881	87.0395	99.4476
DDB_G0267528	1443.33	0.0676783	0.39799	0.17005	0.864971	0.895894	2015.84	952.298	1484.07	1455.05	1553.52	1239.96	1416.18
DDB_G0267530	3716.6	2.22171	0.13632	16.2977	1.02e-59	8.57e-58	6573.63	7486.85	7030.24	1394.52	1532.17	1595.84	1507.51
DDB_G0267532	4.86646	3.12951	1.58347	1.97636	0.0481141	0.0837407	15.6267	5.26131	10.444	2.04042	0	1.40386	1.1481
DDB_G0267534	258.639	-1.78263	0.577635	-3.08608	0.00202812	0.00508666	41.6712	168.362	105.017	377.025	379.038	327.1	361.054
DDB_G0267536	693.002	0.586551	0.563548	1.04082	0.29796	0.375615	1333.48	399.86	866.669	535.271	623.277	573.127	577.225
DDB_G0267538	895.489	-0.963046	0.260168	-3.70163	0.000214216	0.000662329	630.276	510.348	570.312	943.81	1330.64	1062.37	1112.27
DDB_G0267540	148.999	-0.210441	0.276308	-0.761619	0.446287	0.524837	145.849	126.272	136.06	142.83	155.263	174.781	157.625
DDB_G0267542	1.22315	3.04241	3.71332	0.819323	0.412602	0.49041	5.2089	0	2.60445	0.906855	0	0	0.302285
DDB_G0267544	1.04382	-0.87434	2.44177	-0.358076	0.720286	0.774975	0	0	0	3.62742	0.88976	0.701931	1.7397
DDB_G0267546	61.7441	-0.377626	0.383031	-0.985888	0.324188	0.402428	67.7156	36.8292	52.2724	67.1073	70.7359	66.3325	68.0586
DDB_G0267548	248.702	-0.704832	0.243822	-2.89077	0.00384305	0.00906596	166.685	194.669	180.677	318.079	264.704	299.374	294.052
DDB_G0267550	1.14295	3.90642	3.55409	1.09914	0.271709	0.347805	0	5.26131	2.63066	0.453428	0	0	0.151143
DDB_G0267552	208.824	3.04213	0.34928	8.70971	3.05e-18	4.36e-17	572.979	310.418	441.698	58.0387	52.4958	50.1881	53.5742
DDB_G0267554	9.22873	-0.35707	0.98099	-0.363989	0.715866	0.771427	5.2089	10.5226	7.86576	7.70827	11.122	11.5819	10.1374
DDB_G0267556	142.108	-1.36047	0.318843	-4.2669	1.98e-05	7.41e-05	72.9245	73.6584	73.2915	192.253	173.058	198.647	187.986
DDB_G0267560	100.558	-0.414068	0.436655	-0.948273	0.342991	0.422207	46.8801	121.01	83.9451	122.425	98.7634	113.713	111.634
DDB_G0267562	8.23243	-0.106593	1.11787	-0.0953539	0.924034	0.942272	0	15.7839	7.89197	9.97541	9.78736	5.61545	8.45941
DDB_G0267564	11.7724	3.64511	1.05535	3.45393	0.000552473	0.00157129	26.0445	26.3066	26.1755	1.36028	4.4488	0.701931	2.17034
DDB_G0267566	0	NA	NA	NA	NA	NA	0	0	0	0	0	0	0
DDB_G0267568	926.284	-0.926856	0.356273	-2.60153	0.0092809	0.0197537	781.334	420.905	601.12	997.314	1095.74	1336.13	1143.06
DDB_G0267570	1274.22	-0.115089	0.188926	-0.609178	0.542406	0.616907	1390.78	1036.48	1213.63	1341.47	1363.11	1239.26	1314.61
DDB_G0267572	161.185	-6.67256	1.44759	-4.60942	4.04e-06	1.71e-05	5.2089	0	2.60445	267.976	257.586	275.157	266.906
DDB_G0267574	67.8907	-1.26767	1.18174	-1.07271	0.283401	0.359478	0	73.6584	36.8292	91.1389	85.8618	88.7943	88.5984
DDB_G0267576	4.5061	-2.95884	1.57675	-1.87654	0.0605813	0.1023	0	0	0	6.80141	8.00784	7.72125	7.51017
DDB_G0267578	0.346608	0.72822	4.45314	0.163529	0.870102	NA	0	0	0	0.680141	0	1.0529	0.577679
DDB_G0267580	2.74978	-0.108459	1.65903	-0.0653749	0.947876	0.960669	5.2089	0	2.60445	2.26714	3.11416	3.15869	2.84666
DDB_G0267582	164.074	-0.428289	0.301104	-1.4224	0.154911	0.224044	161.476	110.488	135.982	202.682	159.712	186.012	182.802
DDB_G0267584	121.634	-1.20432	0.664631	-1.81202	0.0699837	0.115658	20.8356	115.749	68.2923	167.541	146.81	157.233	157.195
DDB_G0267586	29.2828	-0.733133	0.586771	-1.24944	0.211505	0.292336	31.2534	10.5226	20.888	32.8735	37.3699	34.3946	34.8794
DDB_G0267588	874.741	1.17481	0.11054	10.6279	2.21e-26	5.43e-25	1359.52	1267.98	1313.75	570.639	576.12	599.449	582.069
DDB_G0267590	549.004	1.79498	0.521583	3.44142	0.000578673	0.00163905	1432.45	484.041	958.244	277.044	293.176	258.311	276.177
DDB_G0267592	449.702	0.651398	0.45712	1.425	0.154156	0.223356	729.245	420.905	575.075	449.8	415.518	233.041	366.12
DDB_G0267594	69.4381	-3.03174	0.669944	-4.52537	6.03e-06	2.47e-05	10.4178	15.7839	13.1009	109.956	108.551	102.482	106.996
DDB_G0267596	91.1183	0.611297	0.306824	1.99234	0.046334	0.0811671	125.013	105.226	115.12	82.2971	65.8422	77.2125	75.1173
DDB_G0267598	12.3317	-0.381986	0.993623	-0.384437	0.700654	0.758515	20.8356	0	10.4178	15.87	15.1259	9.82704	13.6076
DDB_G0267600	0	NA	NA	NA	NA	NA	0	0	0	0	0	0	0
DDB_G0267602	82.3007	0.853184	0.423686	2.01372	0.0440392	0.0776277	114.596	110.488	112.542	67.1073	43.1534	76.1596	62.1401
DDB_G0267604	161.549	-0.439289	0.625	-0.702862	0.482142	0.559726	213.565	52.6131	133.089	206.31	183.291	151.968	180.523
DDB_G0267606	16.9451	-1.55406	0.96564	-1.60936	0.107539	0.167562	0	15.7839	7.89197	28.5659	20.0196	20.356	22.9805
DDB_G0267608	16.8525	-3.32695	1.48029	-2.2475	0.024608	0.0470181	0	5.26131	2.63066	25.1652	28.9172	24.9186	26.3337
DDB_G0267610	8.44421	-3.86328	1.69245	-2.28265	0.022451	0.0434152	0	0	0	11.109	22.6889	8.42318	14.0737
DDB_G0267612	7.06967	3.6438	1.64447	2.21579	0.026706	0.0500306	10.4178	21.0453	15.7315	0	1.77952	2.10579	1.2951
DDB_G0267614	107.284	-0.480886	0.877822	-0.547817	0.583818	0.654497	15.6267	157.839	86.7331	113.357	118.338	131.261	120.985
DDB_G0267616	104.233	1.49223	0.390002	3.8262	0.000130136	0.000423354	229.191	110.488	169.84	54.4113	64.9525	62.1209	60.4949
DDB_G0267618	4.19857	7.44054	2.42914	3.06304	0.00219101	0.00543347	5.2089	15.7839	10.4964	0	0	0	0
DDB_G0267620	5.82897	3.74956	1.68475	2.22559	0.0260415	0.0489429	15.6267	10.5226	13.0747	0	0.88976	2.10579	0.998518
DDB_G0267622	6.24485	-3.44199	1.5646	-2.19991	0.0278132	0.0518761	0	0	0	12.2425	8.45272	10.529	10.4081
DDB_G0267624	311.421	13.6539	1.28803	10.6006	2.96e-26	7.23e-25	546.934	1010.17	778.553	0	0	0	0
DDB_G0267628	0	NA	NA	NA	NA	NA	0	0	0	0	0	0	0
DDB_G0267630	120.462	-1.5814	0.406994	-3.88557	0.000102091	0.00033739	67.7156	42.0905	54.9031	191.573	143.696	157.233	164.167
DDB_G0267632	0	NA	NA	NA	NA	NA	0	0	0	0	0	0	0
DDB_G0267634	0	NA	NA	NA	NA	NA	0	0	0	0	0	0	0
DDB_G0267636	79.2372	1.53616	0.355285	4.32373	1.53e-05	5.87e-05	140.64	121.01	130.825	54.1846	36.4802	43.8707	44.8452
DDB_G0267638	972.979	-0.00301129	0.188267	-0.0159948	0.987239	0.990659	843.841	1099.61	971.728	900.28	988.968	1032.19	973.813
DDB_G0267640	150.161	1.21245	0.359814	3.36965	0.000752645	0.0020702	192.729	263.066	227.897	85.4711	83.1926	126.348	98.3371
DDB_G0267642	17.3825	-3.38342	1.49348	-2.26546	0.0234846	0.0450823	0	5.26131	2.63066	29.9262	22.244	29.4811	27.2171
DDB_G0267644	73.8781	-3.12557	0.670936	-4.65853	3.18e-06	1.37e-05	10.4178	15.7839	13.1009	108.142	119.228	115.819	114.396
DDB_G0267646	5.49724	-1.51248	1.56132	-0.968718	0.332686	0.41168	5.2089	0	2.60445	8.84184	7.11808	6.31738	7.42577
DDB_G0267648	115.445	0.105493	0.398895	0.264462	0.791424	0.835716	72.9245	168.362	120.643	121.745	108.551	105.641	111.979
DDB_G0267650	64.9596	-0.0742637	0.443619	-0.167404	0.867052	0.897461	46.8801	78.9197	62.8999	60.986	81.8579	56.1545	66.3328
DDB_G0267654	1.04178	5.43537	4.56169	1.19152	0.233448	0.305271	5.2089	0	2.60445	0	0	0	0
DDB_G0267656	48.752	-1.28912	0.593037	-2.17376	0.029723	0.0549829	46.8801	5.26131	26.0707	65.9737	63.173	62.4719	63.8729
DDB_G0267658	14.4836	0.628893	1.14573	0.5489	0.583074	0.653797	0	36.8292	18.4146	14.0563	8.8976	12.6348	11.8629
DDB_G0267660	0	NA	NA	NA	NA	NA	0	0	0	0	0	0	0
DDB_G0267662	18.8875	-0.429507	0.738089	-0.581917	0.560623	0.633772	20.8356	10.5226	15.6791	26.7522	19.1298	17.1973	21.0265
DDB_G0267666	68.5916	-3.35791	0.745998	-4.50123	6.76e-06	2.75e-05	10.4178	10.5226	10.4702	104.742	103.212	114.064	107.339
DDB_G0267668	28.2108	-1.54343	0.708922	-2.17715	0.0294697	0.0545692	5.2089	21.0453	13.1271	34.9139	40.929	38.9572	38.2667
DDB_G0267670	93.8782	-7.34584	1.46802	-5.00392	5.62e-07	2.66e-06	0	0	0	182.051	150.814	136.526	156.464
DDB_G0267672	5.19826	1.17982	1.06195	1.111	0.266569	0.342218	5.2089	10.5226	7.86576	4.08085	2.66928	3.50966	3.41993
DDB_G0267674	937.231	0.195311	0.305494	0.639329	0.522609	0.599081	1270.97	757.629	1014.3	998.901	852.835	805.817	885.851
DDB_G0267676	9.44957	-2.42454	1.51525	-1.60009	0.109578	0.17026	5.2089	0	2.60445	15.87	14.2362	11.9328	14.013
DDB_G0267678	0.817109	-0.521528	2.38291	-0.218862	0.826757	0.865082	0	0	0	2.49385	0.88976	0.701931	1.36185
DDB_G0267680	20.2997	-5.13169	1.47567	-3.47753	0.000506053	0.00145162	0	0	0	31.5132	35.5904	34.3946	33.8328
DDB_G0267682	56.0827	-2.14931	0.577252	-3.72335	0.000196599	0.000612839	20.8356	15.7839	18.3098	82.5238	82.3028	78.9673	81.2646
DDB_G0267684	5.57528	4.53737	2.41492	1.87889	0.0602599	0.101888	20.8356	5.26131	13.0484	0	1.77952	0	0.593173
DDB_G0267686	490.998	1.62579	0.307562	5.28605	1.25e-07	6.48e-07	1052.2	599.79	825.993	277.271	270.932	254.801	267.668
DDB_G0267688	205.055	3.23683	0.241019	13.4298	4.05e-41	2.06e-39	500.054	384.076	442.065	42.3955	47.1573	51.592	47.0482
DDB_G0267690	60.7587	-3.17309	0.806697	-3.93343	8.37e-05	0.000281811	15.6267	5.26131	10.444	113.81	96.0941	73.0009	94.3018
DDB_G0267692	82.2918	1.30434	0.370221	3.52313	0.000426483	0.00123882	135.431	121.01	128.221	65.0669	45.3778	44.5726	51.6724
DDB_G0267694	1.37088	-1.25063	1.89517	-0.659904	0.509315	0.586156	0	0	0	2.26714	1.77952	2.80773	2.28479
DDB_G0267696	0	NA	NA	NA	NA	NA	0	0	0	0	0	0	0
DDB_G0267698	24.8497	2.57517	0.795423	3.23748	0.0012059	0.00316847	78.1334	21.0453	49.5893	5.66784	7.11808	12.2838	8.35657
DDB_G0267700	0	NA	NA	NA	NA	NA	0	0	0	0	0	0	0
DDB_G0267702	0	NA	NA	NA	NA	NA	0	0	0	0	0	0	0
DDB_G0267704	434.33	0.400847	0.235599	1.70139	0.0888692	0.141754	406.294	610.312	508.303	362.062	396.388	396.591	385.014
DDB_G0267706	31.3684	0.202439	0.554844	0.364858	0.715218	0.770954	20.8356	47.3518	34.0937	33.5536	31.5865	23.5147	29.5516
DDB_G0267708	20.9733	-0.650636	1.09205	-0.595795	0.551312	0.624892	31.2534	0	15.6267	30.1529	14.681	28.7792	24.5377
DDB_G0267710	49.5382	0.510036	0.547582	0.931433	0.35163	0.429631	67.7156	52.6131	60.1644	31.0598	60.5037	35.7985	42.454
DDB_G0267712	192.771	1.16469	0.601679	1.93574	0.0528995	0.0908169	125.013	452.473	288.743	113.81	129.015	143.545	128.79
DDB_G0267714	102.25	-0.874737	0.487594	-1.79399	0.0728152	0.119675	31.2534	105.226	68.2398	133.081	117.448	124.242	124.924
DDB_G0267716	2.73618	-0.126951	1.77429	-0.0715502	0.94296	0.95727	0	5.26131	2.63066	4.53428	1.77952	2.10579	2.80653
DDB_G0267718	51.0661	0.300957	0.391527	0.768675	0.442086	0.520673	41.6712	73.6584	57.6648	48.0633	43.1534	48.7842	46.667
DDB_G0267720	24.1132	0.465793	0.613146	0.759677	0.447447	0.525809	15.6267	42.0905	28.8586	19.4974	25.803	17.5483	20.9496
DDB_G0267722	71.1541	-0.0178472	0.3517	-0.0507456	0.959528	0.969453	72.9245	68.3971	70.6608	76.6293	74.295	63.5248	71.483
DDB_G0267724	0.771766	-0.43866	2.37112	-0.185001	0.853228	0.887062	0	0	0	2.26714	0.88976	0.701931	1.28628
DDB_G0267726	60.6433	11.2939	1.32421	8.5288	1.48e-17	2.01e-16	192.729	110.488	151.608	0	0	0	0
DDB_G0267728	43.4189	3.04065	0.442409	6.87295	6.29e-12	5.2e-11	67.7156	115.749	91.7323	9.52198	11.122	12.9857	11.2099
DDB_G0267730	2498.56	-0.455985	0.419005	-1.08826	0.276481	0.352462	2844.06	1241.67	2042.86	2816.24	2613.23	2977.59	2802.35
DDB_G0267732	467.553	0.949636	0.552407	1.71909	0.0855982	0.13739	1005.32	310.418	657.867	318.306	344.337	359.389	340.677
DDB_G0267734	3197.11	1.02835	0.279277	3.68219	0.000231239	0.000711771	3812.91	5398.11	4605.51	1901.9	2694.19	2178.44	2258.18
DDB_G0267736	2.08356	6.43089	4.44712	1.44608	0.148155	0.215857	10.4178	0	5.2089	0	0	0	0
DDB_G0267740	1.73334	1.16798	1.89405	0.616659	0.53746	0.612883	0	5.26131	2.63066	1.81371	0.88976	0.701931	1.13513
DDB_G0267742	0.586976	0.00424405	2.51786	0.00168557	0.998655	NA	0	0	0	0.453428	1.77952	0.701931	0.978293
DDB_G0267744	91.6758	0.802788	0.348797	2.30159	0.0213582	0.0415422	83.3423	163.101	123.222	68.921	75.6296	67.3854	70.6453
DDB_G0267746	279.469	1.79099	0.225777	7.93255	2.15e-15	2.42e-14	437.547	536.654	487.101	130.134	161.047	131.963	141.048
DDB_G0267748	18.3319	-4.99218	1.51241	-3.30081	0.00096406	0.0025967	0	0	0	33.7804	23.1338	34.7456	30.5532
DDB_G0267750	9.9088	-4.09555	1.51125	-2.71004	0.00672755	0.0148726	0	0	0	15.4165	18.685	15.4425	16.5147
DDB_G0267752	10.1802	-1.37485	1.1424	-1.20348	0.22879	0.305271	10.4178	0	5.2089	15.4165	10.6771	14.3896	13.4944
DDB_G0267754	22.8583	1.15146	0.649526	1.77276	0.0762677	0.124404	15.6267	52.6131	34.1199	16.3234	17.7952	11.9328	15.3505
DDB_G0267756	16.2329	-0.0738074	0.758237	-0.0973407	0.922456	0.940954	5.2089	26.3066	15.7577	14.9631	14.681	20.005	16.5497
DDB_G0267758	15.4189	-0.36988	0.734403	-0.503647	0.61451	0.682047	10.4178	15.7839	13.1009	15.6433	17.3503	17.8992	16.9643
DDB_G0267760	150.687	-0.105493	0.333203	-0.316604	0.751544	0.80158	98.969	189.407	144.188	160.513	164.161	140.386	155.02
DDB_G0267762	5.13191	-1.38406	1.63293	-0.847591	0.396666	0.475075	0	5.26131	2.63066	9.06855	7.11808	4.21159	6.79941
DDB_G0267764	0.677661	-0.214059	2.31711	-0.0923816	0.926395	0.943839	0	0	0	0.906855	1.77952	0.701931	1.12944
DDB_G0267766	127.164	-6.32619	1.44951	-4.36437	1.27e-05	4.93e-05	5.2089	0	2.60445	199.281	214.432	216.897	210.203
DDB_G0267768	98.2733	-2.83735	0.576703	-4.91996	8.66e-07	4.01e-06	0	42.0905	21.0453	154.165	154.373	140.737	149.759
DDB_G0267770	1.28361	-1.16479	2.11836	-0.549856	0.582418	0.653127	0	0	0	2.72057	0.88976	2.80773	2.13935
DDB_G0267772	0	NA	NA	NA	NA	NA	0	0	0	0	0	0	0
DDB_G0267774	135.739	-0.793817	0.310323	-2.55803	0.0105266	0.0220772	104.178	84.181	94.1795	165.048	179.287	146.002	163.445
DDB_G0267776	3932.85	1.75804	0.617702	2.84611	0.00442575	0.0102997	10850.1	2772.71	6811.42	2051.31	1958.36	2031.74	2013.8
DDB_G0267778	3.15679	7.02918	4.40704	1.59499	0.110715	0.171207	0	15.7839	7.89197	0	0	0	0
DDB_G0267780	8.3552	8.43456	1.971	4.27933	1.87e-05	7.06e-05	31.2534	10.5226	20.888	0	0	0	0
DDB_G0267784	66.36	1.7835	0.695578	2.56405	0.0103458	0.0217394	41.6712	189.407	115.539	31.7399	39.1494	29.8321	33.5738
DDB_G0267786	229.324	1.75822	0.387042	4.54271	5.55e-06	2.29e-05	489.636	305.156	397.396	143.737	86.3067	121.785	117.276
DDB_G0267788	241.439	1.44798	0.3545	4.08456	4.42e-05	0.000155979	515.681	263.066	389.373	136.708	151.704	140.035	142.816
DDB_G0267790	2.47943	0.147866	1.75069	0.0844619	0.932689	0.948588	5.2089	0	2.60445	1.36028	2.66928	3.15869	2.39608
DDB_G0267792	0.499709	0.207986	2.38317	0.0872729	0.930455	NA	0	0	0	0.906855	0.88976	0.701931	0.832849
DDB_G0267794	293.69	-2.90098	0.3714	-7.81094	5.68e-15	6.15e-14	88.5512	31.5679	60.0596	460.909	474.687	412.736	449.444
DDB_G0267796	340.067	0.43476	0.186909	2.32606	0.0200156	0.0392559	453.174	352.508	402.841	286.566	293.621	314.465	298.217
DDB_G0267798	469.363	0.470645	0.336725	1.39771	0.162199	0.232902	401.085	726.061	563.573	449.347	413.738	356.581	406.555
DDB_G0267800	29.8839	-2.03684	0.790564	-2.57644	0.00998246	0.0210883	15.6267	5.26131	10.444	45.116	36.0353	47.3804	42.8439
DDB_G0267802	0	NA	NA	NA	NA	NA	0	0	0	0	0	0	0
DDB_G0267804	395.391	0.553026	0.325438	1.69933	0.0892567	0.142331	635.485	341.985	488.735	337.123	316.31	346.052	333.162
DDB_G0267806	0	NA	NA	NA	NA	NA	0	0	0	0	0	0	0
DDB_G0267808	28.5472	-1.23474	0.657414	-1.87817	0.0603576	0.102026	15.6267	15.7839	15.7053	33.1002	41.3738	36.8514	37.1085
DDB_G0267810	46.6213	-0.856341	0.470857	-1.81869	0.0689592	0.114204	31.2534	31.5679	31.4106	60.5326	56.0549	53.6977	56.7617
DDB_G0267812	0	NA	NA	NA	NA	NA	0	0	0	0	0	0	0
DDB_G0267814	18.6218	-5.01352	1.60294	-3.1277	0.00176183	0.00447763	0	0	0	35.1406	16.9054	41.063	31.0364
DDB_G0267816	20.8277	-1.40264	0.857714	-1.63532	0.101982	0.159693	0	21.0453	10.5226	30.3796	30.2518	22.4618	27.6978
DDB_G0267818	316.121	-0.933786	0.355249	-2.62854	0.00857523	0.0184115	130.222	278.85	204.536	382.466	386.156	402.909	390.51
DDB_G0267820	27.2229	-5.55955	1.46597	-3.79241	0.000149193	0.000480676	0	0	0	46.703	44.488	44.9236	45.3715
DDB_G0267822	146.826	-2.27343	0.398505	-5.70489	1.16e-08	6.82e-08	62.5067	26.3066	44.4067	219.686	227.334	198.296	215.105
DDB_G0267824	108.045	-3.19368	0.612483	-5.21431	1.85e-07	9.38e-07	10.4178	26.3066	18.3622	162.781	197.527	143.194	167.834
DDB_G0267826	2.44107	-2.07802	1.84704	-1.12506	0.260564	0.335563	0	0	0	4.76099	5.33856	2.10579	4.06845
DDB_G0267828	40.7875	-0.766863	0.519557	-1.47599	0.139946	0.208127	31.2534	26.3066	28.78	56.4517	43.5982	46.3275	48.7925
DDB_G0267830	52.3877	-3.38196	0.872445	-3.87642	0.000106006	0.000349072	5.2089	10.5226	7.86576	73.9087	92.9799	79.3182	82.069
DDB_G0267832	37.0818	2.02939	0.562614	3.60707	0.000309677	0.000925341	88.5512	47.3518	67.9515	21.5378	11.122	16.8464	16.5021
DDB_G0267834	70.6738	2.08041	0.679422	3.06203	0.00219844	0.00544824	208.356	52.6131	130.484	39.2215	25.803	27.3753	30.7999
DDB_G0267836	31.6181	-0.889961	0.568343	-1.56589	0.117375	0.179394	26.0445	15.7839	20.9142	40.3551	38.7046	37.2024	38.754
DDB_G0267838	47.558	-1.63857	0.57194	-2.86493	0.00417102	0.00976038	31.2534	10.5226	20.888	58.9456	70.7359	66.3325	65.338
DDB_G0267840	28.2711	4.26726	0.851371	5.01222	5.38e-07	2.55e-06	52.089	78.9197	65.5043	1.36028	2.66928	6.31738	3.44898
DDB_G0267842	3.37275	-2.53665	2.00897	-1.26266	0.206711	0.28657	0	0	0	4.08085	10.6771	2.10579	5.62125
DDB_G0267844	0	NA	NA	NA	NA	NA	0	0	0	0	0	0	0
DDB_G0267846	132.868	1.94544	0.821434	2.36835	0.0178675	0.0353761	62.5067	415.644	239.075	54.8647	55.1651	76.1596	62.0631
DDB_G0267848	243.595	-2.1185	0.335069	-6.32258	2.57e-10	1.8e-09	98.969	63.1358	81.0524	382.239	306.522	367.11	351.957
DDB_G0267850	620.866	-6.02682	0.605149	-9.95923	2.3e-23	4.67e-22	15.6267	15.7839	15.7053	987.339	1097.96	987.617	1024.31
DDB_G0267852	27.2915	-3.00145	1.07329	-2.7965	0.00516591	0.0118449	5.2089	5.26131	5.23511	36.2742	40.929	48.7842	41.9958
DDB_G0267854	891.18	0.0419654	0.367018	0.114342	0.908967	0.930894	1218.88	594.529	906.705	880.783	900.437	861.27	880.83
DDB_G0267856	8.19955	-2.20003	1.59053	-1.38321	0.166602	0.23836	5.2089	0	2.60445	16.5501	8.00784	11.2309	11.9296
DDB_G0267858	40.6678	-1.60201	0.601871	-2.66171	0.00777451	0.0168761	20.8356	15.7839	18.3098	59.399	57.8344	49.4862	55.5732
DDB_G0267860	2.57368	-2.15084	1.8667	-1.15221	0.249233	0.323081	0	0	0	4.53428	6.22832	2.10579	4.28946
DDB_G0267862	0.854674	-0.567848	3.9819	-0.142607	0.8866	0.91256	0	0	0	2.49385	1.77952	0	1.42446
DDB_G0267864	3.07035	-2.42004	1.9491	-1.24162	0.214378	0.295751	0	0	0	7.25484	1.77952	6.31738	5.11725
DDB_G0267866	79.9494	-0.538076	0.451166	-1.19263	0.233012	0.305271	31.2534	94.7037	62.9785	97.2602	88.0862	88.4434	91.2633
DDB_G0267868	3.1638	-0.417534	1.98665	-0.21017	0.833535	0.870853	0	5.26131	2.63066	3.62742	6.22832	0.701931	3.51922
DDB_G0267870	84.0378	-0.647001	0.42364	-1.52724	0.126701	0.191238	88.5512	36.8292	62.6902	105.422	104.102	85.2847	98.2695
DDB_G0267872	45.715	-6.30829	1.46302	-4.31184	1.62e-05	6.17e-05	0	0	0	78.8964	68.9564	80.7221	76.1916
DDB_G0267874	30.1924	0.0900594	0.499064	0.180456	0.856794	0.889512	31.2534	31.5679	31.4106	31.9666	26.6928	29.4811	29.3802
DDB_G0267876	0.140386	2.04809	4.52016	0.453101	0.650476	NA	0	0	0	0	0	0.701931	0.233977
DDB_G0267878	6.23442	-3.44012	1.57908	-2.17856	0.0293646	0.0543927	0	0	0	13.1494	8.8976	9.12511	10.3907
DDB_G0267880	25.7246	-5.47968	1.47047	-3.72648	0.000194176	0.000605969	0	0	0	46.0229	40.4841	42.1159	42.8743
DDB_G0267882	378.939	-0.685589	0.188547	-3.63617	0.000276722	0.000838677	250.027	305.156	277.592	443.225	468.459	427.827	446.504
DDB_G0267884	44.664	-1.53371	0.673777	-2.27629	0.0228289	0.0440456	36.4623	5.26131	20.8618	68.4676	65.3974	47.7313	60.5321
DDB_G0267886	48.2319	-2.15374	0.633711	-3.39861	0.000677285	0.00188452	10.4178	21.0453	15.7315	72.3217	73.8501	63.5248	69.8989
DDB_G0267888	22.9626	5.24063	0.946959	5.53417	3.13e-08	1.74e-07	20.8356	89.4423	55.139	0.906855	2.2244	1.40386	1.51171
DDB_G0267890	170.324	-0.191937	0.289633	-0.662691	0.507528	0.584465	203.147	110.488	156.817	175.703	183.291	178.992	179.329
DDB_G0267892	89.0138	1.67842	0.425283	3.94659	7.93e-05	0.00026783	166.685	136.794	151.739	57.3586	31.5865	52.6449	47.1966
DDB_G0267894	177.438	-1.25526	0.27241	-4.608	4.07e-06	1.72e-05	78.1334	115.749	96.9412	234.875	226.444	231.988	231.103
DDB_G0267896	1.04178	5.43537	4.56169	1.19152	0.233448	0.305271	5.2089	0	2.60445	0	0	0	0
DDB_G0267898	1.49714	1.84749	4.15257	0.444903	0.65639	0.719356	0	5.26131	2.63066	0	2.2244	0	0.741467
DDB_G0267902	37.1951	1.27937	0.53751	2.38018	0.0173042	0.0343841	57.2979	57.8745	57.5862	25.8454	15.1259	29.8321	23.6011
DDB_G0267904	44.8756	-0.957254	1.10968	-0.862644	0.388333	0.466474	57.2979	0	28.6489	56.225	59.6139	51.241	55.6933
DDB_G0267906	268.099	1.81363	0.617328	2.93786	0.00330483	0.00789753	734.454	205.191	469.823	149.858	104.992	146.002	133.617
DDB_G0267908	81.2654	-5.6763	1.45193	-3.90949	9.25e-05	0.000308715	0	5.26131	2.63066	140.789	129.015	131.261	133.689
DDB_G0267910	46.549	1.49827	0.440583	3.40065	0.000672253	0.00187146	93.7601	57.8745	75.8173	22.218	32.9211	25.9715	27.0368
DDB_G0267914	40.341	-2.16185	0.719773	-3.00352	0.00266876	0.00649707	5.2089	21.0453	13.1271	60.5326	48.9368	65.9815	58.4836
DDB_G0267916	22.4888	-2.70056	1.08041	-2.49957	0.0124344	0.0256831	5.2089	5.26131	5.23511	37.8612	36.0353	28.0773	33.9912
DDB_G0267918	67.7563	-1.55062	0.483589	-3.20649	0.00134365	0.00349134	15.6267	47.3518	31.4893	100.207	90.3106	85.2847	91.9343
DDB_G0267920	0	NA	NA	NA	NA	NA	0	0	0	0	0	0	0
DDB_G0267922	1.04178	5.43537	4.56169	1.19152	0.233448	0.305271	5.2089	0	2.60445	0	0	0	0
DDB_G0267924	1113.42	1.09729	0.31269	3.5092	0.000449457	0.00129906	2062.72	1210.1	1636.41	842.242	677.107	774.932	764.76
DDB_G0267928	1785.8	-4.21715	0.329449	-12.8006	1.63e-37	7.01e-36	135.431	173.623	154.527	3034.79	3344.61	2240.56	2873.32
DDB_G0267930	90.8352	-2.35613	0.650014	-3.62474	0.00028925	0.000873526	26.0445	26.3066	26.1755	172.983	146.366	82.4769	133.942
DDB_G0267932	0.616955	-0.116765	2.46869	-0.0472982	0.962276	0.971601	0	0	0	1.587	0.44488	1.0529	1.02826
DDB_G0267934	1.18217	3.49347	3.73206	0.936071	0.349237	0.427227	5.2089	0	2.60445	0	0	0.701931	0.233977
DDB_G0267936	0	NA	NA	NA	NA	NA	0	0	0	0	0	0	0
DDB_G0267938	31.3562	0.00455815	0.513165	0.00888242	0.992913	0.994715	41.6712	21.0453	31.3582	31.2865	34.7006	28.0773	31.3548
DDB_G0267940	19.9803	-0.907006	0.90546	-1.00171	0.316485	0.394374	0	26.3066	13.1533	27.8858	18.685	27.0244	24.5317
DDB_G0267942	290.058	1.05769	0.175396	6.03032	1.64e-09	1.06e-08	427.129	415.644	421.387	194.52	195.747	217.248	202.505
DDB_G0267946	0.980445	-0.75484	4.21724	-0.178989	0.857946	0.890625	0	0	0	0.453428	4.4488	0	1.63408
DDB_G0267948	207.145	-0.514601	0.225857	-2.27844	0.0227003	0.0438283	166.685	163.101	164.893	242.13	221.995	241.815	235.314
DDB_G0267950	125.055	-1.64338	0.361102	-4.55101	5.34e-06	2.21e-05	31.2534	78.9197	55.0865	175.476	169.054	170.569	171.7
DDB_G0267952	31.8215	2.47991	0.467231	5.30767	1.11e-07	5.78e-07	72.9245	52.6131	62.7688	11.3357	8.8976	13.3367	11.19
DDB_G0267954	10.2097	-4.14245	1.53124	-2.70528	0.00682462	0.015063	0	0	0	18.1371	19.5747	13.3367	17.0162
DDB_G0267956	851.058	0.698242	0.34144	2.04499	0.0408559	0.0727249	1442.86	768.152	1105.51	652.482	647.745	744.047	681.425
DDB_G0267958	145.588	0.0549358	0.35972	0.152718	0.878621	0.906627	197.938	99.965	148.952	161.194	133.019	135.824	143.345
DDB_G0267960	79.8462	-1.98581	0.475352	-4.17755	2.95e-05	0.000107308	26.0445	31.5679	28.8062	122.652	111.22	107.746	113.873
DDB_G0267962	260.085	1.18928	0.242124	4.91186	9.02e-07	4.17e-06	437.547	347.247	392.397	179.557	147.255	188.82	171.877
DDB_G0267964	0	NA	NA	NA	NA	NA	0	0	0	0	0	0	0
DDB_G0267966	2310.35	1.4018	0.246858	5.67858	1.36e-08	7.89e-08	4448.4	2920.03	3684.21	1329.68	1404.49	1449.14	1394.43
DDB_G0267968	8.52784	-0.191494	1.20073	-0.159481	0.87329	0.902226	15.6267	0	7.81334	7.25484	13.7913	5.96642	9.00418
DDB_G0267970	0	NA	NA	NA	NA	NA	0	0	0	0	0	0	0
DDB_G0267974	336.894	-0.128482	0.251408	-0.51105	0.609316	0.677201	385.458	252.543	319.001	365.916	362.577	317.975	348.823
DDB_G0267976	63.4013	-1.43322	0.46359	-3.09156	0.00199107	0.00500396	20.8356	42.0905	31.463	89.3252	80.5233	84.2318	84.6934
DDB_G0267978	1315.79	0.0909536	0.170963	0.532007	0.594721	0.663754	1437.66	1294.28	1365.97	1288.64	1146.46	1411.93	1282.34
DDB_G0267980	121.46	1.39276	0.534488	2.60579	0.00916626	0.0195511	291.698	94.7037	193.201	68.921	76.5194	75.4576	73.6327
DDB_G0267982	1484.24	0.287499	0.126311	2.27612	0.0228389	0.0440495	1739.77	1588.92	1664.34	1277.99	1395.59	1418.95	1364.18
DDB_G0267984	235.385	-1.18537	0.30054	-3.94413	8.01e-05	0.000270184	177.102	89.4423	133.272	290.42	308.302	311.658	303.46
DDB_G0267986	0	NA	NA	NA	NA	NA	0	0	0	0	0	0	0
DDB_G0267988	12.3234	0.156663	0.932419	0.168018	0.866569	0.897236	0	26.3066	13.1533	11.109	11.5669	12.6348	11.7702
DDB_G0267990	77.884	5.3673	0.690877	7.76882	7.92e-15	8.46e-14	270.863	105.226	188.044	6.80141	2.66928	3.86062	4.44377
DDB_G0267992	115.317	0.0522222	0.319901	0.163245	0.870325	0.900005	140.64	94.7037	117.672	98.8472	117.448	124.944	113.746
DDB_G0267994	382.716	-0.0509844	0.205624	-0.24795	0.804173	0.846782	333.369	415.644	374.507	369.317	427.085	368.163	388.188
DDB_G0267996	104.842	0.230152	0.319018	0.72144	0.470639	0.548449	151.058	78.9197	114.989	101.341	97.4287	95.4627	98.0775
DDB_G0267998	0	NA	NA	NA	NA	NA	0	0	0	0	0	0	0
DDB_G0268000	10.8287	2.39444	0.831263	2.88048	0.00397068	0.00934109	15.6267	26.3066	20.9666	3.17399	6.22832	2.80773	4.07001
DDB_G0268002	0	NA	NA	NA	NA	NA	0	0	0	0	0	0	0
DDB_G0268004	556.877	2.15182	0.717964	2.99711	0.00272554	0.00662363	1744.98	336.724	1040.85	238.73	219.326	244.623	234.226
DDB_G0268006	5.72876	0.885861	1.35541	0.653572	0.513387	0.589797	0	15.7839	7.89197	4.08085	6.6732	2.10579	4.28661
DDB_G0268008	101.616	-2.1034	0.741949	-2.83496	0.00458308	0.0106188	5.2089	63.1358	34.1723	158.246	146.366	135.122	146.578
DDB_G0268010	0.0906855	2.4812	4.544	0.546038	0.58504	NA	0	0	0	0.453428	0	0	0.151143
DDB_G0268012	12.018	2.46192	0.816788	3.01415	0.00257699	0.00629867	20.8356	26.3066	23.5711	2.72057	3.55904	6.66835	4.31598
DDB_G0268014	117.98	-0.945481	0.315935	-2.99264	0.00276576	0.00671398	83.3423	68.3971	75.8697	146.457	136.578	155.127	146.054
DDB_G0268016	0.280773	1.0444	4.46423	0.23395	0.815024	NA	0	0	0	0	0	1.40386	0.467954
DDB_G0268018	155.91	-1.22065	0.860139	-1.41913	0.155862	0.225164	15.6267	157.839	86.7331	199.508	213.542	193.031	202.027
DDB_G0268020	883.575	0.0575574	0.245475	0.234474	0.814617	0.855203	1099.08	710.277	904.677	835.667	881.752	891.102	869.507
DDB_G0268022	2.65107	-2.19957	1.70718	-1.28842	0.197599	0.27628	0	0	0	4.08085	3.55904	5.61545	4.41845
DDB_G0268024	185.793	0.461093	0.260966	1.76687	0.0772498	0.125727	270.863	173.623	222.243	168.675	165.94	149.862	161.493
DDB_G0268026	190.19	1.21241	0.538271	2.25242	0.0242956	0.0464864	145.849	431.428	288.638	107.462	120.562	145.651	124.559
DDB_G0268028	26.6196	-4.02068	1.49292	-2.69317	0.00707771	0.0155285	5.2089	0	2.60445	33.3269	48.9368	45.6255	42.6298
DDB_G0268030	225.168	2.23421	0.210544	10.6116	2.63e-26	6.46e-25	395.876	457.734	426.805	93.6328	97.8736	80.7221	90.7428
DDB_G0268034	2838.61	0.0715746	0.380004	0.188352	0.850601	0.88483	1916.87	3930.2	2923.54	2504.51	2884.6	2956.89	2782
DDB_G0268036	135.44	-1.7811	0.381858	-4.66428	3.1e-06	1.33e-05	31.2534	78.9197	55.0865	194.974	197.972	174.079	189.008
DDB_G0268038	251.734	0.173411	0.399055	0.434555	0.663886	0.726045	166.685	373.553	270.119	233.515	257.141	227.777	239.478
DDB_G0268040	102.487	-1.56267	0.426858	-3.66087	0.000251358	0.000767707	20.8356	73.6584	47.247	138.749	145.476	133.718	139.314
DDB_G0268042	2408.56	0.174737	0.287152	0.608519	0.542843	0.61734	3239.93	1930.9	2585.42	2256.71	2396.12	2219.16	2290.66
DDB_G0268044	1170.51	-0.868843	0.127154	-6.83299	8.32e-12	6.76e-11	828.214	736.584	782.399	1387.72	1424.95	1475.11	1429.26
DDB_G0268046	0.658878	-0.179425	2.22054	-0.0808026	0.935599	0.951093	0	0	0	0.906855	1.33464	1.0529	1.09813
DDB_G0268048	10.6514	-2.60654	1.51262	-1.7232	0.084852	0.136371	5.2089	0	2.60445	13.1494	17.3503	17.5483	16.016
DDB_G0268050	0.52456	0.1469	2.36205	0.0621916	0.95041	NA	0	0	0	0.680141	0.88976	1.0529	0.874266
DDB_G0268052	904.793	0.668678	0.317431	2.10653	0.0351583	0.0636924	843.841	1483.69	1163.77	660.644	787.882	747.908	732.145
DDB_G0268054	4.80062	3.28661	1.53838	2.13641	0.0326458	0.0597288	15.6267	5.26131	10.444	1.36028	0	1.75483	1.03837
DDB_G0268056	137.491	-2.86471	0.496166	-5.77369	7.76e-09	4.64e-08	10.4178	47.3518	28.8848	211.751	229.113	188.82	209.894
DDB_G0268058	0	NA	NA	NA	NA	NA	0	0	0	0	0	0	0
DDB_G0268060	816.798	2.33045	0.406951	5.7266	1.02e-08	6.05e-08	2125.23	1020.7	1572.96	324.201	261.145	352.721	312.689
DDB_G0268062	37.4189	1.0904	0.458392	2.37875	0.0173712	0.0345111	78.1334	31.5679	54.8507	25.6187	25.803	25.9715	25.7977
DDB_G0268064	257.799	-0.925856	0.250166	-3.70097	0.000214777	0.000663506	192.729	142.055	167.392	338.03	326.987	289.196	318.071
DDB_G0268066	39.0226	0.78669	0.478021	1.64572	0.0998208	0.156687	67.7156	36.8292	52.2724	33.5536	24.0235	32.9908	30.1893
DDB_G0268068	154.746	0.199487	0.391189	0.50995	0.610087	0.677888	104.178	231.498	167.838	151.218	133.464	153.372	146.018
DDB_G0268070	46.1417	-0.827429	0.950219	-0.870777	0.383876	0.462377	5.2089	57.8745	31.5417	75.7224	59.6139	32.2888	55.8751
DDB_G0268072	0	NA	NA	NA	NA	NA	0	0	0	0	0	0	0
DDB_G0268074	168.374	1.00562	0.261783	3.84143	0.000122319	0.000399572	255.236	226.237	240.736	116.304	138.803	105.29	120.132
DDB_G0268076	12.7669	-1.02432	1.05197	-0.973714	0.330199	0.409132	10.4178	5.26131	7.83955	13.6028	24.0235	10.529	16.0518
DDB_G0268078	163.48	1.65973	0.282379	5.87766	4.16e-09	2.58e-08	343.787	210.453	277.12	90.9122	89.4209	82.8279	87.7203
DDB_G0268080	303.161	-1.78294	0.256311	-6.95616	3.5e-12	2.95e-11	135.431	110.488	122.959	437.331	440.876	391.678	423.295
DDB_G0268082	9.70144	5.896	2.07364	2.84331	0.00446475	0.0103817	0	47.3518	23.6759	0.453428	0	0.701931	0.38512
DDB_G0268084	63.5057	-2.13197	0.543532	-3.92243	8.77e-05	0.000294194	26.0445	15.7839	20.9142	88.1917	95.2043	92.304	91.9
DDB_G0268086	0	NA	NA	NA	NA	NA	0	0	0	0	0	0	0
DDB_G0268088	335.383	0.34429	0.235855	1.45975	0.144358	0.213768	458.383	310.418	384.4	325.561	287.392	295.162	302.705
DDB_G0268090	94.7876	1.71063	0.312187	5.47949	4.27e-08	2.33e-07	161.476	163.101	162.288	46.9298	59.6139	42.8178	49.7872
DDB_G0268092	23.5659	4.41306	0.993007	4.44413	8.82e-06	3.52e-05	20.8356	89.4423	55.139	3.85413	0.88976	2.80773	2.51721
DDB_G0268094	9.00481	-3.95591	1.61395	-2.45108	0.014243	0.0288997	0	0	0	12.696	21.7991	10.529	15.008
DDB_G0268096	7.54107	-2.03975	1.52532	-1.33726	0.181138	0.256202	0	5.26131	2.63066	9.29527	11.5669	11.5819	10.8147
DDB_G0268098	1914.82	-3.40782	0.256701	-13.2755	3.21e-40	1.6e-38	213.565	352.508	283.036	2789.49	3189.34	3029.18	3002.67
DDB_G0268100	200.751	-3.45449	0.481149	-7.17966	6.99e-13	6.28e-12	52.089	5.26131	28.6751	325.334	325.207	295.864	315.469
DDB_G0268102	842.418	0.953101	0.331398	2.876	0.00402751	0.00945866	1541.83	831.288	1186.56	578.574	618.828	641.565	612.989
DDB_G0268104	2711.55	2.24516	0.217721	10.3121	6.21e-25	1.41e-23	6016.27	4282.71	5149.49	1036.99	1054.81	1166.96	1086.25
DDB_G0268106	0	NA	NA	NA	NA	NA	0	0	0	0	0	0	0
DDB_G0268108	3.31377	4.90465	2.24497	2.18473	0.0289088	0.0536215	10.4178	5.26131	7.83955	0	0.88976	0	0.296587
DDB_G0268110	120.612	3.2722	0.641084	5.10416	3.32e-07	1.63e-06	406.294	115.749	261.021	25.6187	21.3542	34.0437	27.0055
DDB_G0268112	33.8552	-5.87679	1.47398	-3.98702	6.69e-05	0.000228789	0	0	0	64.16	50.7163	54.3997	56.4253
DDB_G0268114	105.39	-1.43124	0.629158	-2.27484	0.0229153	0.0441661	88.5512	15.7839	52.1676	144.87	148.59	129.155	140.872
DDB_G0268116	21.0433	-1.0127	0.738297	-1.37168	0.170164	0.242671	5.2089	21.0453	13.1271	29.9262	24.4684	24.5676	26.3207
DDB_G0268118	301.462	0.920894	0.461816	1.99407	0.0461443	0.0808606	604.232	236.759	420.496	233.288	204.2	228.83	222.106
DDB_G0268120	0	NA	NA	NA	NA	NA	0	0	0	0	0	0	0
DDB_G0268122	32.4961	2.37931	0.842995	2.82245	0.00476582	0.0110237	15.6267	110.488	63.0571	11.7891	13.3464	11.2309	12.1221
DDB_G0268124	0.764928	-0.379072	2.55661	-0.148272	0.882128	0.909229	0	0	0	0.453428	2.66928	0.701931	1.27488
DDB_G0268126	28.2582	-0.925059	0.619287	-1.49375	0.135242	0.202002	15.6267	21.0453	18.336	34.2338	39.1494	31.2359	34.8731
DDB_G0268128	0	NA	NA	NA	NA	NA	0	0	0	0	0	0	0
DDB_G0268130	84.1922	-0.165256	0.356682	-0.463314	0.643139	0.707534	67.7156	89.4423	78.579	89.5519	75.6296	98.6214	87.9343
DDB_G0268132	192.333	0.238348	0.424025	0.562109	0.574042	0.645504	296.907	126.272	211.589	175.023	198.861	164.603	179.496
DDB_G0268134	607.249	0.169576	0.462513	0.366642	0.713886	0.76982	369.832	931.253	650.542	509.199	635.289	590.675	578.388
DDB_G0268136	0	NA	NA	NA	NA	NA	0	0	0	0	0	0	0
DDB_G0268138	160.553	-1.57494	0.332917	-4.73074	2.24e-06	9.79e-06	57.2979	89.4423	73.3701	203.362	240.68	211.983	218.675
DDB_G0268140	478.685	1.64022	0.232461	7.05591	1.71e-12	1.49e-11	942.81	673.448	808.129	283.166	235.342	258.662	259.056
DDB_G0268142	108.789	-1.98061	0.440582	-4.49544	6.94e-06	2.82e-05	15.6267	63.1358	39.3812	157.339	161.491	146.353	155.061
DDB_G0268144	272.999	4.72323	0.276777	17.0651	2.7e-65	2.68e-63	765.708	526.131	645.92	24.9385	22.244	25.9715	24.3847
DDB_G0268146	8.64075	-3.89722	1.83983	-2.11825	0.0341538	0.0621061	0	0	0	9.74869	27.1377	6.31738	14.4013
DDB_G0268148	133.23	-6.39387	1.71004	-3.73903	0.000184731	0.000578784	0	5.26131	2.63066	191.12	404.841	64.9287	220.296
DDB_G0268150	0.0906855	2.4812	4.544	0.546038	0.58504	NA	0	0	0	0.453428	0	0	0.151143
DDB_G0268152	4.49936	4.1752	1.46659	2.84687	0.00441511	0.0102771	15.6267	5.26131	10.444	0.906855	0	0.701931	0.536262
DDB_G0268154	173.017	0.255576	0.724737	0.352646	0.724354	0.77837	62.5067	320.94	191.723	177.97	176.617	127.05	160.546
DDB_G0268156	61.1559	-2.2934	0.582736	-3.93558	8.3e-05	0.000279553	15.6267	21.0453	18.336	95.8999	88.976	84.2318	89.7026
DDB_G0268158	115.925	-2.74932	0.528822	-5.19895	2e-07	1.02e-06	26.0445	26.3066	26.1755	195.201	143.251	188.82	175.757
DDB_G0268160	1.87031	0.973388	1.79975	0.540847	0.588613	0.658603	0	5.26131	2.63066	0.906855	1.77952	1.40386	1.36341
DDB_G0268162	147.465	0.453586	0.708832	0.639907	0.522233	0.598713	57.2979	294.634	175.966	126.28	140.137	118.977	128.465
DDB_G0268164	52.4732	0.107999	0.486596	0.221949	0.824354	0.863222	62.5067	47.3518	54.9293	64.6134	48.9368	38.9572	50.8358
DDB_G0268166	1.3706	2.36323	2.62682	0.899654	0.368304	0.4463	0	5.26131	2.63066	0	0.88976	0.701931	0.530564
DDB_G0268168	145.547	0.770102	0.239812	3.21128	0.00132146	0.00344179	187.52	199.93	193.725	121.972	114.779	103.535	113.429
DDB_G0268170	0	NA	NA	NA	NA	NA	0	0	0	0	0	0	0
DDB_G0268172	3.12534	7.01564	4.40778	1.59165	0.111464	0.171571	15.6267	0	7.81334	0	0	0	0
DDB_G0268174	0	NA	NA	NA	NA	NA	0	0	0	0	0	0	0
DDB_G0268176	71.8579	4.06422	0.551755	7.36599	1.76e-13	1.68e-12	197.938	131.533	164.735	9.52198	14.681	5.61545	9.93949
DDB_G0268178	0.499709	0.207986	2.38317	0.0872729	0.930455	NA	0	0	0	0.906855	0.88976	0.701931	0.832849
DDB_G0268180	25.7609	-1.05576	0.81009	-1.30327	0.192483	0.269931	20.8356	10.5226	15.6791	44.4359	20.0196	32.9908	32.4821
DDB_G0268182	175.702	-3.39473	0.482286	-7.03883	1.94e-12	1.68e-11	10.4178	42.0905	26.2542	282.032	282.499	261.469	275.333
DDB_G0268184	4.41916	4.67778	1.39407	3.3555	0.000792226	0.00216987	10.4178	10.5226	10.4702	0.453428	0	0.701931	0.38512
DDB_G0268186	62.5558	-1.26417	0.46166	-2.73831	0.00617554	0.0137875	36.4623	31.5679	34.0151	83.8841	72.0706	88.7943	81.583
DDB_G0268188	3.88635	-0.86428	1.69477	-0.509968	0.610074	0.677888	5.2089	0	2.60445	4.53428	2.66928	7.01931	4.74096
DDB_G0268190	118.137	0.560913	0.41328	1.35722	0.174711	0.248193	197.938	94.7037	146.321	82.5238	103.212	112.309	99.3483
DDB_G0268192	20.5073	5.50204	1.326	4.14935	3.33e-05	0.00012035	78.1334	21.0453	49.5893	1.13357	2.2244	0	1.11932
DDB_G0268194	157.845	0.763152	0.230809	3.30642	0.000944967	0.00255088	234.4	184.146	209.273	119.478	132.574	118.626	123.56
DDB_G0268196	77.4827	-0.135148	0.456361	-0.296142	0.767122	0.814652	109.387	36.8292	73.108	79.5765	82.3028	79.3182	80.3992
DDB_G0268198	64.6519	-5.34251	1.46321	-3.65122	0.000261	0.000794079	0	5.26131	2.63066	116.758	92.0902	109.15	105.999
DDB_G0268200	0	NA	NA	NA	NA	NA	0	0	0	0	0	0	0
DDB_G0268202	16.333	-0.50103	0.908941	-0.551224	0.58148	0.65234	26.0445	0	13.0222	14.9631	21.3542	19.3031	18.5402
DDB_G0268204	4.5019	0.386443	1.19725	0.322775	0.746866	0.797479	5.2089	5.26131	5.23511	4.08085	4.4488	3.50966	4.0131
DDB_G0268206	0	NA	NA	NA	NA	NA	0	0	0	0	0	0	0
DDB_G0268208	8.45291	-3.8722	1.54859	-2.50047	0.012403	0.0256328	0	0	0	13.1494	11.5669	17.5483	14.0882
DDB_G0268210	17.9433	0.0634471	0.717696	0.0884038	0.929556	0.946273	10.4178	26.3066	18.3622	14.5097	22.6889	15.7935	17.664
DDB_G0268212	15.7806	2.5849	0.714978	3.61535	0.000299939	0.000899926	15.6267	47.3518	31.4893	4.08085	6.22832	5.61545	5.30821
DDB_G0268214	1.04178	5.43537	4.56169	1.19152	0.233448	0.305271	5.2089	0	2.60445	0	0	0	0
DDB_G0268216	206.718	2.24091	0.258121	8.68162	3.9e-18	5.56e-17	432.338	352.508	392.423	81.8437	70.7359	96.1646	82.9147
DDB_G0268218	143.527	-3.63123	0.56786	-6.39458	1.61e-10	1.14e-09	5.2089	31.5679	18.3884	236.462	226.444	217.95	226.952
DDB_G0268220	66.6823	-2.21475	0.567666	-3.90151	9.56e-05	0.00031802	5.2089	36.8292	21.019	102.021	88.976	100.376	97.1245
DDB_G0268222	1189.69	-0.477388	0.139005	-3.43432	0.000594037	0.00167783	994.899	931.253	963.076	1322.19	1267.46	1432.64	1340.77
DDB_G0268224	177.611	0.684616	0.635104	1.07796	0.281052	0.357073	369.832	89.4423	229.637	139.429	150.369	138.982	142.927
DDB_G0268226	11.8682	1.87787	1.32932	1.41266	0.157757	0.227594	0	42.0905	21.0453	3.62742	8.00784	5.61545	5.75024
DDB_G0268228	98.4353	-0.580345	0.375494	-1.54555	0.122213	0.185733	52.089	99.965	76.027	123.786	98.7634	117.574	113.374
DDB_G0268230	72.2434	-1.38763	0.51032	-2.71913	0.00654531	0.0145228	31.2534	42.0905	36.6719	80.4834	86.3067	121.083	95.9578
DDB_G0268232	285.508	0.942191	0.28312	3.32789	0.000875076	0.0023785	312.534	489.302	400.918	222.633	220.216	182.853	208.567
DDB_G0268234	0.536695	0.106417	4.43722	0.0239827	0.980866	NA	0	0	0	0.226714	0	2.45676	0.894491
DDB_G0268236	2759.53	-1.62973	0.142502	-11.4365	2.75e-30	8.52e-29	1140.75	1304.81	1222.78	3538.1	4010.59	3803.42	3784.03
DDB_G0268238	38.8622	-2.09591	0.697549	-3.00468	0.00265862	0.00647526	5.2089	21.0453	13.1271	51.9175	54.7202	61.419	56.0189
DDB_G0268240	7.2217	-0.712612	1.22237	-0.582975	0.55991	0.633161	0	10.5226	5.26131	9.97541	5.78344	9.82704	8.52863
DDB_G0268244	893.151	-1.0276	0.261438	-3.93058	8.47e-05	0.000284833	416.712	683.971	550.341	1102.96	1154.46	1107.65	1121.69
DDB_G0268246	16.3201	1.02024	0.761856	1.33916	0.18052	0.255426	31.2534	15.7839	23.5187	13.1494	6.6732	14.7406	11.5211
DDB_G0268248	0	NA	NA	NA	NA	NA	0	0	0	0	0	0	0
DDB_G0268250	0.0906855	2.4812	4.544	0.546038	0.58504	NA	0	0	0	0.453428	0	0	0.151143
DDB_G0268252	107.94	-5.0767	1.04161	-4.87391	1.09e-06	4.98e-06	5.2089	5.26131	5.23511	191.346	157.488	180.396	176.41
DDB_G0268254	0.268638	1.11373	4.467	0.249324	0.80311	NA	0	0	0	0.453428	0.88976	0	0.447729
DDB_G0268258	46.7368	-3.21383	0.87005	-3.69384	0.000220894	0.000681279	10.4178	5.26131	7.83955	79.3498	64.9525	73.7028	72.6684
DDB_G0268260	41.3772	3.22834	0.535924	6.02387	1.7e-09	1.1e-08	52.089	126.272	89.1803	8.84184	8.45272	11.2309	9.50849
DDB_G0268264	6179.3	2.45131	0.185828	13.1912	9.85e-40	4.81e-38	13428.5	10817.3	12122.9	1979.44	2262.21	2409.03	2216.89
DDB_G0268266	139.291	-3.82042	0.656308	-5.82107	5.85e-09	3.56e-08	10.4178	21.0453	15.7315	255.053	177.952	231.988	221.664
DDB_G0268268	36.6461	0.00490513	0.728628	0.00673201	0.994629	0.996073	10.4178	63.1358	36.7768	38.9948	28.9172	41.7649	36.559
DDB_G0268270	463.686	-0.0985989	0.206657	-0.477113	0.633282	0.698667	474.01	415.644	444.827	462.723	431.534	534.521	476.259
DDB_G0268272	0.140386	2.04809	4.52016	0.453101	0.650476	NA	0	0	0	0	0	0.701931	0.233977
DDB_G0268274	87.8948	3.33336	0.296292	11.2502	2.31e-29	6.83e-28	166.685	215.714	191.199	17.6837	18.685	20.707	19.0252
DDB_G0268278	33.1515	4.01891	0.652969	6.15483	7.52e-10	5.03e-09	83.3423	68.3971	75.8697	3.62742	2.66928	7.72125	4.67265
DDB_G0268280	13.3602	-0.0541561	0.790934	-0.0684711	0.945411	0.959052	5.2089	21.0453	13.1271	15.6433	11.5669	13.3367	13.5156
DDB_G0268284	3.13582	7.02062	2.55082	2.7523	0.00591776	0.0132711	10.4178	5.26131	7.83955	0	0	0	0
DDB_G0268286	7.62461	-3.71743	1.57538	-2.35971	0.0182894	0.0361336	0	0	0	9.52198	12.4566	16.1444	12.7077
DDB_G0268288	45.1071	1.33482	0.381691	3.49711	0.000470326	0.00135441	83.3423	57.8745	70.6084	27.2057	31.1416	25.9715	28.1062
DDB_G0268290	0	NA	NA	NA	NA	NA	0	0	0	0	0	0	0
DDB_G0268292	0	NA	NA	NA	NA	NA	0	0	0	0	0	0	0
DDB_G0268294	3.13582	7.02062	2.55082	2.7523	0.00591776	0.0132711	10.4178	5.26131	7.83955	0	0	0	0
DDB_G0268298	0	NA	NA	NA	NA	NA	0	0	0	0	0	0	0
DDB_G0268300	0	NA	NA	NA	NA	NA	0	0	0	0	0	0	0
DDB_G0268302	3729.98	0.246919	0.264993	0.931792	0.351444	0.429585	3323.28	4914.07	4118.67	2984.23	3615.09	3813.24	3470.86
DDB_G0268304	0	NA	NA	NA	NA	NA	0	0	0	0	0	0	0
DDB_G0268306	31.8579	4.13285	0.924593	4.46992	7.83e-06	3.15e-05	31.2534	115.749	73.5011	7.25484	2.2244	2.80773	4.09566
DDB_G0268310	0	NA	NA	NA	NA	NA	0	0	0	0	0	0	0
DDB_G0268312	0.177952	1.74604	4.49921	0.388076	0.697959	NA	0	0	0	0	0.88976	0	0.296587
DDB_G0268314	3.32426	4.90808	2.24572	2.18552	0.0288504	0.0535519	5.2089	10.5226	7.86576	0	0.88976	0	0.296587
DDB_G0268316	161.426	-0.787771	0.343987	-2.29012	0.0220143	0.0426605	119.805	105.226	112.515	211.977	153.928	216.195	194.034
DDB_G0268318	0.593814	-0.0526742	4.22669	-0.0124623	0.990057	0.992575	0	0	0	2.26714	0	0.701931	0.98969
DDB_G0268320	656.866	0.82	0.505819	1.62113	0.104989	0.16396	1317.85	457.734	887.792	518.948	485.809	503.987	502.915
DDB_G0268322	14.6866	8.27519	1.62519	5.09183	3.55e-07	1.73e-06	57.2979	15.7839	36.5409	0	0	0.350966	0.116989
DDB_G0268324	0.181371	1.62411	4.49189	0.361565	0.717677	NA	0	0	0	0.906855	0	0	0.302285
DDB_G0268326	0.0906855	2.4812	4.544	0.546038	0.58504	NA	0	0	0	0.453428	0	0	0.151143
DDB_G0268328	291.442	0.766203	0.198213	3.86556	0.000110836	0.000364219	437.547	336.724	387.136	223.767	216.657	242.517	227.647
DDB_G0268330	142.565	-1.42776	0.4731	-3.01789	0.00254541	0.00622976	36.4623	105.226	70.8443	174.796	171.724	224.618	190.379
DDB_G0268332	92.2812	9.12052	0.830283	10.9848	4.52e-28	1.24e-26	260.445	199.93	230.187	0.680141	0	0.350966	0.343702
DDB_G0268334	231.332	1.78307	0.267657	6.66175	2.71e-11	2.1e-10	489.636	315.679	402.658	115.851	126.346	109.15	117.116
DDB_G0268336	32.2518	-3.26498	1.06793	-3.05729	0.00223345	0.00552878	10.4178	0	5.2089	54.638	53.3856	42.8178	50.2805
DDB_G0268338	0	NA	NA	NA	NA	NA	0	0	0	0	0	0	0
DDB_G0268340	3.13582	7.02062	2.55082	2.7523	0.00591776	0.0132711	10.4178	5.26131	7.83955	0	0	0	0
DDB_G0268342	0	NA	NA	NA	NA	NA	0	0	0	0	0	0	0
DDB_G0268344	76.7227	-5.59118	1.45896	-3.8323	0.000126952	0.000413363	5.2089	0	2.60445	134.668	132.129	111.607	126.135
DDB_G0268346	115.745	8.07685	0.599948	13.4626	2.6e-41	1.33e-39	338.578	236.759	287.669	0.906855	1.77952	0.701931	1.12944
DDB_G0268348	16.2966	-3.2786	1.49474	-2.19343	0.0282764	0.052642	5.2089	0	2.60445	26.2988	28.9172	21.0579	25.4246
DDB_G0268350	112.885	2.72519	0.398807	6.83336	8.29e-12	6.75e-11	291.698	168.362	230.03	38.5413	39.1494	26.6734	34.7881
DDB_G0268352	8.24671	0.619206	0.938822	0.659556	0.509539	0.586291	5.2089	15.7839	10.4964	8.84184	5.78344	5.61545	6.74691
DDB_G0268354	238.258	-0.993753	0.349977	-2.83948	0.00451866	0.0104938	93.7601	205.191	149.476	297.675	306.522	288.143	297.447
DDB_G0268358	111.468	0.779771	0.718033	1.08598	0.277487	0.35348	250.027	47.3518	148.689	82.7505	92.9799	84.2318	86.6541
DDB_G0268360	529.678	-0.665913	1.11692	-0.596203	0.55104	0.624731	31.2534	752.368	391.811	598.524	654.863	611.382	621.59
DDB_G0268362	9.69107	-0.476308	1.0112	-0.471031	0.637619	0.702679	5.2089	10.5226	7.86576	9.97541	8.00784	14.7406	10.9079
DDB_G0268364	153.54	0.299486	0.313515	0.95525	0.339451	0.418589	130.222	215.714	172.968	137.389	158.377	125.997	140.588
DDB_G0268366	21.5213	-1.96017	0.884284	-2.21668	0.026645	0.0499307	5.2089	10.5226	7.86576	29.4728	32.9211	29.4811	30.625
DDB_G0268368	1451.56	-0.773586	0.290883	-2.65944	0.00782717	0.0169775	1067.82	968.082	1017.95	1327.86	2153.22	1740.79	1740.62
DDB_G0268370	0	NA	NA	NA	NA	NA	0	0	0	0	0	0	0
DDB_G0268374	21.3575	3.50981	0.586947	5.97977	2.23e-09	1.43e-08	36.4623	57.8745	47.1684	3.62742	3.55904	5.26449	4.15032
DDB_G0268376	2.12367	-1.86872	1.87026	-0.999181	0.317707	0.395629	0	0	0	3.17399	5.33856	2.10579	3.53945
DDB_G0268382	0	NA	NA	NA	NA	NA	0	0	0	0	0	0	0
DDB_G0268384	351.707	-3.55806	0.363099	-9.79914	1.14e-22	2.22e-21	72.9245	21.0453	46.9849	550.008	554.765	559.79	554.854
DDB_G0268386	73.4925	-1.29559	0.452619	-2.86243	0.00420402	0.00982718	52.089	26.3066	39.1978	101.341	104.547	83.1789	96.3556
DDB_G0268388	33.2306	2.75949	0.645657	4.27392	1.92e-05	7.21e-05	93.7601	42.0905	67.9253	9.74869	14.2362	6.31738	10.1007
DDB_G0268390	5.29958	6.20175	2.92732	2.11858	0.0341261	0.062077	26.0445	0	13.0222	0.453428	0	0	0.151143
DDB_G0268394	475.085	1.97359	0.430821	4.581	4.63e-06	1.94e-05	1198.05	520.87	859.458	215.832	198.861	241.815	218.836
DDB_G0268396	225.985	-2.47626	0.990642	-2.49966	0.0124314	0.0256817	5.2089	115.749	60.4789	348.686	381.262	279.018	336.322
DDB_G0268398	1.05226	5.44259	4.56113	1.19325	0.23277	0.305271	0	5.26131	2.63066	0	0	0	0
DDB_G0268400	0	NA	NA	NA	NA	NA	0	0	0	0	0	0	0
DDB_G0268402	181.344	1.628	0.71524	2.27616	0.0228364	0.0440495	510.472	99.965	305.218	101.568	96.0941	98.6214	98.7611
DDB_G0268404	149.797	-2.50378	0.813003	-3.07968	0.00207226	0.00518206	5.2089	73.6584	39.4336	222.406	250.467	197.243	223.372
DDB_G0268406	0	NA	NA	NA	NA	NA	0	0	0	0	0	0	0
DDB_G0268408	0	NA	NA	NA	NA	NA	0	0	0	0	0	0	0
DDB_G0268410	40.8111	1.10926	0.448114	2.47541	0.0133085	0.0272388	83.3423	36.8292	60.0858	25.3919	29.3621	29.1302	27.9614
DDB_G0268412	84.0149	1.08982	0.422362	2.5803	0.00987143	0.0208817	72.9245	173.623	123.274	59.399	55.1651	58.9622	57.8421
DDB_G0268420	36.2812	-0.923558	0.798571	-1.15651	0.247472	0.321137	10.4178	36.8292	23.6235	39.4482	28.0274	66.6835	44.7197
DDB_G0268422	7.68744	-3.7358	1.52199	-2.45455	0.0141061	0.0286587	0	0	0	13.6028	12.9015	11.9328	12.8124
DDB_G0268424	113.061	-0.665964	0.347697	-1.91536	0.0554469	0.094594	114.596	52.6131	83.6044	139.882	125.901	132.314	132.699
DDB_G0268426	35.1708	-1.34159	0.591628	-2.26763	0.0233518	0.044869	20.8356	15.7839	18.3098	46.4763	45.3778	47.3804	46.4115
DDB_G0268428	1.05226	5.44259	4.56113	1.19325	0.23277	0.305271	0	5.26131	2.63066	0	0	0	0
DDB_G0268430	66.4954	1.35439	0.397577	3.4066	0.000657777	0.00183532	67.7156	142.055	104.886	44.4359	38.2597	40.0101	40.9019
DDB_G0268432	14.9394	1.81123	0.811921	2.2308	0.0256946	0.0483822	15.6267	36.8292	26.2279	7.70827	4.00392	10.529	7.41372
DDB_G0268434	56.3011	0.710044	0.605396	1.17286	0.240853	0.313802	31.2534	115.749	73.5011	50.1037	37.3699	47.0294	44.8344
DDB_G0268438	0	NA	NA	NA	NA	NA	0	0	0	0	0	0	0
DDB_G0268440	0	NA	NA	NA	NA	NA	0	0	0	0	0	0	0
DDB_G0268442	56.0194	-0.509403	0.93539	-0.544589	0.586036	0.656584	5.2089	84.181	44.695	61.6662	67.6218	61.419	63.569
DDB_G0268444	13.9832	-3.04079	1.48818	-2.04329	0.0410236	0.0729763	0	5.26131	2.63066	22.218	23.1338	19.3031	21.5516
DDB_G0268446	88.1115	5.20494	0.415202	12.5359	4.75e-36	1.91e-34	239.609	184.146	211.878	6.5747	3.55904	6.66835	5.6007
DDB_G0268448	60.5864	-3.16435	0.757186	-4.17909	2.93e-05	0.000106656	0	21.0453	10.5226	93.8595	100.988	87.0395	93.9623
DDB_G0268450	1.18857	-1.05806	2.14008	-0.494404	0.621021	0.687545	0	0	0	2.94728	0.88976	2.10579	1.98094
DDB_G0268452	61.107	-1.2138	0.485574	-2.49972	0.0124291	0.0256817	15.6267	52.6131	34.1199	73.682	86.7516	76.8615	79.0984
DDB_G0268454	5.07928	2.8325	2.28189	1.2413	0.214496	0.295865	0	21.0453	10.5226	2.94728	0	1.40386	1.45038
DDB_G0268456	5.63618	4.19296	1.49398	2.80657	0.00500719	0.0115265	20.8356	5.26131	13.0484	0.680141	0	1.40386	0.694668
DDB_G0268458	0	NA	NA	NA	NA	NA	0	0	0	0	0	0	0
DDB_G0268460	0	NA	NA	NA	NA	NA	0	0	0	0	0	0	0
DDB_G0268462	239.031	4.11026	0.486932	8.44114	3.14e-17	4.18e-16	531.307	568.222	549.765	21.7645	24.0235	49.8371	31.8751
DDB_G0268464	0	NA	NA	NA	NA	NA	0	0	0	0	0	0	0
DDB_G0268466	0	NA	NA	NA	NA	NA	0	0	0	0	0	0	0
DDB_G0268470	1.05226	5.44259	4.56113	1.19325	0.23277	0.305271	0	5.26131	2.63066	0	0	0	0
DDB_G0268472	870.552	1.57963	0.21655	7.29454	3e-13	2.81e-12	1687.68	1210.1	1448.89	457.735	522.734	474.506	484.992
DDB_G0268474	1.05226	5.44259	4.56113	1.19325	0.23277	0.305271	0	5.26131	2.63066	0	0	0	0
DDB_G0268476	0	NA	NA	NA	NA	NA	0	0	0	0	0	0	0
DDB_G0268478	74.5061	-0.0303646	0.842088	-0.0360587	0.971236	0.978448	15.6267	131.533	73.5798	62.3463	82.3028	80.7221	75.1237
DDB_G0268480	26.5981	-1.10009	0.74251	-1.48158	0.138451	0.206127	10.4178	21.0453	15.7315	24.9385	43.5982	32.9908	33.8425
DDB_G0268482	0.63138	-0.13582	4.22351	-0.032158	0.974346	0.980833	0	0	0	2.26714	0.88976	0	1.0523
DDB_G0268484	6.27164	8.02063	1.99574	4.01887	5.85e-05	0.000201772	20.8356	10.5226	15.6791	0	0	0	0
DDB_G0268486	0.0906855	2.4812	4.544	0.546038	0.58504	NA	0	0	0	0.453428	0	0	0.151143
DDB_G0268488	0	NA	NA	NA	NA	NA	0	0	0	0	0	0	0
DDB_G0268490	0	NA	NA	NA	NA	NA	0	0	0	0	0	0	0
DDB_G0268492	162.206	-0.847558	0.660755	-1.28271	0.199593	0.278627	182.311	36.8292	109.57	189.533	206.869	195.488	197.297
DDB_G0268494	14.4325	-1.97503	1.10857	-1.78161	0.0748133	0.122466	10.4178	0	5.2089	21.7645	23.1338	16.8464	20.5815
DDB_G0268496	446.772	-1.81833	0.548612	-3.31443	0.000918312	0.00248561	276.071	78.9197	177.496	595.124	682.891	600.853	626.289
DDB_G0268498	509.447	-1.42084	0.218389	-6.506	7.72e-11	5.68e-10	239.609	268.327	253.968	663.365	624.167	751.768	679.767
DDB_G0268500	224.611	-0.0257729	0.267208	-0.0964529	0.923161	0.9415	239.609	205.191	222.4	262.988	201.531	213.738	226.086
DDB_G0268502	29.981	1.79598	0.558554	3.21541	0.00130259	0.00339824	36.4623	68.3971	52.4297	15.4165	10.6771	18.9521	15.0153
DDB_G0268504	474.651	0.743592	0.211987	3.50773	0.000451944	0.00130471	635.485	615.574	625.53	326.921	428.864	366.408	374.065
DDB_G0268506	720.047	-3.11859	0.26142	-11.9294	8.31e-33	2.86e-31	114.596	142.055	128.326	1030.41	1223.42	1089.75	1114.53
DDB_G0268508	4.18808	7.43758	2.20072	3.37961	0.000725894	0.0020031	10.4178	10.5226	10.4702	0	0	0	0
DDB_G0268510	0	NA	NA	NA	NA	NA	0	0	0	0	0	0	0
DDB_G0268512	97.5238	-0.0811745	0.285167	-0.284657	0.775907	0.822399	93.7601	94.7037	94.2319	98.1671	99.2082	101.78	99.7185
DDB_G0268516	75.4341	-0.41379	0.476718	-0.867998	0.385396	0.463802	31.2534	94.7037	62.9785	85.9245	74.7398	90.5491	83.7378
DDB_G0268518	77.6592	-1.4013	0.847749	-1.65297	0.0983374	0.154622	72.9245	5.26131	39.0929	116.304	100.098	93.7078	103.37
DDB_G0268520	58.8049	-0.0529533	0.365104	-0.145036	0.884682	0.911011	62.5067	52.6131	57.5599	60.986	56.4998	61.419	59.6349
DDB_G0268522	20.8522	-3.65265	1.47256	-2.48047	0.0131211	0.0269251	0	5.26131	2.63066	30.6064	34.7006	33.6927	32.9999
DDB_G0268524	6.27164	8.02063	1.99574	4.01887	5.85e-05	0.000201772	20.8356	10.5226	15.6791	0	0	0	0
DDB_G0268526	70.5396	-0.179711	0.395073	-0.454881	0.649195	0.7133	88.5512	42.0905	65.3209	73.4553	67.1769	81.424	74.0187
DDB_G0268528	5.25083	7.76317	2.37844	3.26398	0.00109859	0.00291567	5.2089	21.0453	13.1271	0	0	0	0
DDB_G0268534	280.42	-4.43601	0.525853	-8.43583	3.29e-17	4.37e-16	26.0445	15.7839	20.9142	448.213	473.352	438.707	453.424
DDB_G0268536	84.6279	-1.93278	0.594042	-3.25361	0.00113949	0.00301261	10.4178	52.6131	31.5155	136.708	127.236	96.1646	120.036
DDB_G0268538	491.256	0.519917	0.322744	1.61092	0.107196	0.167076	421.921	778.675	600.298	428.943	426.64	400.101	418.561
DDB_G0268540	0	NA	NA	NA	NA	NA	0	0	0	0	0	0	0
DDB_G0268542	8.44589	6.76373	1.66241	4.06862	4.73e-05	0.000166058	31.2534	10.5226	20.888	0.453428	0	0	0.151143
DDB_G0268544	0	NA	NA	NA	NA	NA	0	0	0	0	0	0	0
DDB_G0268546	6.26804	0.615156	1.18903	0.517358	0.604906	0.673419	5.2089	10.5226	7.86576	2.26714	6.6732	6.66835	5.2029
DDB_G0268548	463.251	1.20493	0.76745	1.57004	0.116406	0.178111	1203.25	199.93	701.592	310.825	270.932	331.312	304.356
DDB_G0268550	1.05226	5.44259	4.56113	1.19325	0.23277	0.305271	0	5.26131	2.63066	0	0	0	0
DDB_G0268552	19.3148	-2.45335	1.09563	-2.23922	0.0251417	0.047486	0	10.5226	5.26131	26.2988	25.3582	34.3946	28.6839
DDB_G0268554	7.83033	-2.11452	1.54996	-1.36424	0.172491	0.245546	5.2089	0	2.60445	10.6555	8.8976	14.3896	11.3142
DDB_G0268556	32.2756	4.64409	1.06115	4.37645	1.21e-05	4.69e-05	62.5067	89.4423	75.9745	0.906855	7.11808	1.40386	3.14293
DDB_G0268558	71.7409	-1.80327	0.468896	-3.84578	0.000120167	0.000392894	31.2534	26.3066	28.78	102.475	96.539	102.131	100.382
DDB_G0268560	86.5983	1.99318	0.277165	7.19133	6.42e-13	5.79e-12	145.849	168.362	157.106	36.2742	40.0392	42.4668	39.5934
DDB_G0268562	0	NA	NA	NA	NA	NA	0	0	0	0	0	0	0
DDB_G0268564	59.893	-0.421809	0.400403	-1.05346	0.292129	0.369065	36.4623	63.1358	49.799	64.8401	62.7281	72.2989	66.6224
DDB_G0268566	28.2206	1.60528	0.600187	2.67463	0.00748115	0.0162874	20.8356	73.6584	47.247	14.9631	16.9054	14.7406	15.5364
DDB_G0268568	0	NA	NA	NA	NA	NA	0	0	0	0	0	0	0
DDB_G0268570	13.8388	-4.58881	1.53889	-2.98189	0.00286471	0.00692979	0	0	0	30.1529	18.685	20.356	23.0646
DDB_G0268572	7.33439	8.24573	1.80482	4.56872	4.91e-06	2.04e-05	15.6267	21.0453	18.336	0	0	0	0
DDB_G0268574	456.427	-2.80254	0.338947	-8.26837	1.36e-16	1.72e-15	62.5067	136.794	99.6505	767.426	663.316	652.094	694.279
DDB_G0268576	73.9785	-1.43124	0.454903	-3.14625	0.00165381	0.00422172	15.6267	57.8745	36.7506	101.794	93.8697	100.727	98.7971
DDB_G0268578	316.807	-0.0815812	0.190856	-0.427449	0.669052	0.730864	328.16	284.111	306.136	319.893	306.522	345.35	323.922
DDB_G0268580	20.9195	9.75845	1.41769	6.88333	5.85e-12	4.85e-11	62.5067	42.0905	52.2986	0	0	0	0
DDB_G0268582	5.26131	7.76631	4.37559	1.77492	0.0759113	0.123931	0	26.3066	13.1533	0	0	0	0
DDB_G0268584	0	NA	NA	NA	NA	NA	0	0	0	0	0	0	0
DDB_G0268586	44.987	-1.54057	0.57759	-2.66725	0.00764758	0.0166267	20.8356	21.0453	20.9404	60.3059	69.4013	53.3468	61.018
DDB_G0268588	33.2178	2.19743	0.951998	2.30823	0.0209861	0.0409194	114.596	10.5226	62.5592	12.696	14.2362	14.0386	13.6569
DDB_G0268590	20.3703	-0.587927	0.686421	-0.85651	0.391716	0.470025	15.6267	15.7839	15.7053	26.2988	19.5747	24.5676	23.4804
DDB_G0268592	513.167	-0.0855545	0.202926	-0.421605	0.673314	0.734609	427.129	562.961	495.045	531.19	562.328	482.227	525.249
DDB_G0268594	1.05226	5.44259	4.56113	1.19325	0.23277	0.305271	0	5.26131	2.63066	0	0	0	0
DDB_G0268596	0	NA	NA	NA	NA	NA	0	0	0	0	0	0	0
DDB_G0268598	1.04178	5.43537	4.56169	1.19152	0.233448	0.305271	5.2089	0	2.60445	0	0	0	0
DDB_G0268600	351.591	3.01482	0.18245	16.5241	2.46e-61	2.17e-59	713.619	768.152	740.885	84.1108	101.878	90.1982	92.0622
DDB_G0268602	0.0906855	2.4812	4.544	0.546038	0.58504	NA	0	0	0	0.453428	0	0	0.151143
DDB_G0268604	0	NA	NA	NA	NA	NA	0	0	0	0	0	0	0
DDB_G0268606	1.05226	5.44259	4.56113	1.19325	0.23277	0.305271	0	5.26131	2.63066	0	0	0	0
DDB_G0268608	3.1463	7.02444	2.55196	2.75256	0.00591307	0.0132711	5.2089	10.5226	7.86576	0	0	0	0
DDB_G0268610	0	NA	NA	NA	NA	NA	0	0	0	0	0	0	0
DDB_G0268612	0	NA	NA	NA	NA	NA	0	0	0	0	0	0	0
DDB_G0268614	187.049	-0.581186	0.279995	-2.0757	0.0379213	0.0681053	135.431	152.578	144.005	195.201	246.019	206.017	215.745
DDB_G0268616	509.933	-0.768753	0.158172	-4.86024	1.17e-06	5.31e-06	375.04	341.985	358.513	606.233	597.474	628.931	610.879
DDB_G0268618	159.789	-1.21424	0.48965	-2.47981	0.0131454	0.0269649	41.6712	136.794	89.2327	204.042	197.082	219.354	206.826
DDB_G0268620	830.48	1.15588	0.422572	2.73533	0.00623169	0.0139045	1734.56	747.107	1240.83	560.89	537.415	572.425	556.91
DDB_G0268622	148.298	7.89949	0.916789	8.61648	6.9e-18	9.59e-17	484.427	252.543	368.485	1.36028	0	3.15869	1.50632
DDB_G0268624	39.587	-1.81579	0.790907	-2.29583	0.0216857	0.0421197	0	31.5679	15.7839	46.4763	65.8422	54.0487	55.4558
DDB_G0268626	37.907	-0.0762537	0.736844	-0.103487	0.917577	0.937624	10.4178	63.1358	36.7768	48.29	34.7006	32.9908	38.6605
DDB_G0268628	71.1749	-3.85221	0.882358	-4.36581	1.27e-05	4.9e-05	5.2089	10.5226	7.86576	125.146	122.342	92.6549	113.381
DDB_G0268630	1403.16	-0.417316	0.380888	-1.09564	0.273236	0.349112	1578.3	757.629	1167.96	1427.39	1642.94	1609.53	1559.95
DDB_G0268632	11674.1	-0.687495	0.262736	-2.61667	0.00887914	0.0189864	6797.61	10291.1	8544.37	12158.4	14379.4	14743.7	13760.5
DDB_G0268634	97.2982	-1.47109	0.464484	-3.16714	0.00153945	0.00395266	20.8356	73.6584	47.247	135.121	117.893	138.982	130.666
DDB_G0268636	139.227	0.699233	0.436135	1.60325	0.10888	0.169365	109.387	252.543	180.965	104.062	100.988	129.155	111.402
DDB_G0268638	523.38	-1.46829	0.185857	-7.90012	2.79e-15	3.09e-14	229.191	278.85	254.021	673.793	724.71	710.355	702.952
DDB_G0268640	3.58241	3.46778	1.76989	1.95932	0.0500752	0.0866891	10.4178	5.26131	7.83955	0.453428	1.77952	0	0.744316
DDB_G0268642	117.217	0.275184	0.266419	1.0329	0.301651	0.378927	140.64	121.01	130.825	111.316	113.444	99.6743	108.145
DDB_G0268644	1.05226	5.44259	4.56113	1.19325	0.23277	0.305271	0	5.26131	2.63066	0	0	0	0
DDB_G0268646	473.331	0.719458	0.405611	1.77377	0.0761019	0.124167	854.259	384.076	619.167	360.702	364.357	403.26	376.106
DDB_G0268650	905.219	-0.686435	0.246517	-2.78453	0.00536057	0.0122404	520.89	804.981	662.935	997.541	1095.74	1106.95	1066.74
DDB_G0268652	103.576	-2.41487	0.46858	-5.15359	2.56e-07	1.27e-06	31.2534	26.3066	28.78	161.42	155.708	143.194	153.441
DDB_G0268656	1.33304	2.49294	3.97699	0.62684	0.530764	0.606729	0	5.26131	2.63066	0	0	1.40386	0.467954
DDB_G0268660	133.678	5.0797	0.47883	10.6086	2.72e-26	6.65e-25	218.774	420.905	319.839	6.80141	10.6771	11.2309	9.56981
DDB_G0268662	358.349	2.6553	0.448597	5.91912	3.24e-09	2.03e-08	1020.94	426.166	723.555	108.142	109.44	127.05	114.878
DDB_G0268664	3523.21	1.27091	0.34752	3.65709	0.000255091	0.000778248	3786.87	7076.47	5431.67	1990.55	2347.19	2414.99	2250.91
DDB_G0268666	47.5751	-0.887747	0.842108	-1.0542	0.291793	0.368767	5.2089	57.8745	31.5417	67.5607	64.0627	43.1688	58.2641
DDB_G0268668	6.47915	-3.49137	1.54697	-2.25691	0.0240137	0.0460099	0	0	0	12.2425	10.6771	9.47607	10.7986
DDB_G0268670	0	NA	NA	NA	NA	NA	0	0	0	0	0	0	0
DDB_G0268672	0	NA	NA	NA	NA	NA	0	0	0	0	0	0	0
DDB_G0268674	0	NA	NA	NA	NA	NA	0	0	0	0	0	0	0
DDB_G0268676	0	NA	NA	NA	NA	NA	0	0	0	0	0	0	0
DDB_G0268678	29.2858	-0.997396	0.739526	-1.3487	0.177435	0.25177	5.2089	31.5679	18.3884	38.9948	27.1377	43.5197	36.5507
DDB_G0268680	316.284	3.9544	0.480597	8.2281	1.9e-16	2.37e-15	1015.73	426.166	720.951	42.6222	40.0392	56.8564	46.5059
DDB_G0268684	142.681	-2.92391	0.465797	-6.27721	3.45e-10	2.38e-09	20.8356	36.8292	28.8324	222.18	230.003	203.56	218.581
DDB_G0268686	90.2452	1.11067	0.506784	2.1916	0.0284085	0.0528346	192.729	73.6584	133.194	72.095	50.2714	62.4719	61.6128
DDB_G0268688	0	NA	NA	NA	NA	NA	0	0	0	0	0	0	0
DDB_G0268690	0	NA	NA	NA	NA	NA	0	0	0	0	0	0	0
DDB_G0268692	0	NA	NA	NA	NA	NA	0	0	0	0	0	0	0
DDB_G0268694	0	NA	NA	NA	NA	NA	0	0	0	0	0	0	0
DDB_G0268696	233.011	-0.787947	0.219771	-3.58532	0.000336668	0.000999232	177.102	147.317	162.21	282.485	286.503	271.647	280.212
DDB_G0268698	87.1657	-0.891901	0.372157	-2.39657	0.0165493	0.0331106	57.2979	57.8745	57.5862	100.434	100.543	119.679	106.885
DDB_G0268702	915.511	1.38069	0.460059	3.00112	0.00268992	0.0065457	2083.56	820.765	1452.16	539.579	590.356	543.295	557.743
DDB_G0268704	57.8271	0.104021	0.468036	0.22225	0.824119	0.863058	31.2534	89.4423	60.3479	51.0106	59.169	58.2603	56.1466
DDB_G0268706	270.541	-1.10657	0.333483	-3.3182	0.000905983	0.00245668	109.387	210.453	159.92	305.837	373.254	353.773	344.288
DDB_G0268708	30.8422	-1.37743	0.792208	-1.73873	0.0820827	0.132422	0	31.5679	15.7839	42.1688	45.3778	35.0966	40.881
DDB_G0268710	166.239	-0.491425	0.355645	-1.38179	0.167037	0.238859	88.5512	178.885	133.718	169.582	186.405	207.772	187.919
DDB_G0268712	0.0906855	2.4812	4.544	0.546038	0.58504	NA	0	0	0	0.453428	0	0	0.151143
DDB_G0268714	69.2754	-1.59376	0.506225	-3.14832	0.00164213	0.00419385	46.8801	15.7839	31.332	106.555	82.7477	94.4098	94.571
DDB_G0268716	4.46382	0.403361	1.3644	0.295632	0.767511	0.814908	0	10.5226	5.26131	4.30756	2.2244	5.26449	3.93215
DDB_G0268718	125.762	-3.94214	0.667633	-5.90465	3.53e-09	2.21e-08	20.8356	5.26131	13.0484	212.884	189.074	200.752	200.904
DDB_G0268720	283.014	4.26365	0.297011	14.3552	9.89e-47	6.1e-45	807.379	505.086	656.233	32.6468	33.8109	36.1495	34.2024
DDB_G0268724	1.05226	5.44259	4.56113	1.19325	0.23277	0.305271	0	5.26131	2.63066	0	0	0	0
DDB_G0268726	0	NA	NA	NA	NA	NA	0	0	0	0	0	0	0
DDB_G0268730	0	NA	NA	NA	NA	NA	0	0	0	0	0	0	0
DDB_G0268732	0	NA	NA	NA	NA	NA	0	0	0	0	0	0	0
DDB_G0268734	2.08356	6.43089	4.44712	1.44608	0.148155	0.215857	10.4178	0	5.2089	0	0	0	0
DDB_G0268738	0	NA	NA	NA	NA	NA	0	0	0	0	0	0	0
DDB_G0268740	0.409024	0.516128	2.54962	0.202433	0.839578	NA	0	0	0	0.453428	0.88976	0.701931	0.681706
DDB_G0268742	21.3739	-3.69634	1.4712	-2.51247	0.011989	0.0248702	0	5.26131	2.63066	36.0475	32.9211	32.6398	33.8695
DDB_G0268744	305.099	11.8172	1.23733	9.55058	1.29e-21	2.38e-20	1140.75	384.076	762.412	0.226714	0.44488	0	0.223865
DDB_G0268746	102.413	-1.77108	0.410038	-4.31931	1.57e-05	5.98e-05	57.2979	26.3066	41.8022	150.765	145.031	132.665	142.82
DDB_G0268748	0	NA	NA	NA	NA	NA	0	0	0	0	0	0	0
DDB_G0268750	0	NA	NA	NA	NA	NA	0	0	0	0	0	0	0
DDB_G0268752	0	NA	NA	NA	NA	NA	0	0	0	0	0	0	0
DDB_G0268754	96.4651	8.62495	1.30948	6.58655	4.5e-11	3.39e-10	328.16	152.578	240.369	1.587	0	0	0.528999
DDB_G0268756	0.371458	0.632962	4.45025	0.142231	0.886898	NA	0	0	0	0.453428	0	1.40386	0.619097
DDB_G0268758	1058.63	-1.14904	0.636887	-1.80415	0.0712077	0.117417	234.4	989.127	611.764	1318.11	1368.01	1383.51	1356.54
DDB_G0268760	96.0612	-0.997474	0.374414	-2.6641	0.00771953	0.01677	57.2979	63.1358	60.2168	136.482	113.889	109.501	119.957
DDB_G0268762	488.449	-3.82167	0.345729	-11.054	2.1e-28	5.89e-27	57.2979	52.6131	54.9555	764.479	835.04	732.816	777.445
DDB_G0268764	596.078	-2.47498	0.237322	-10.4288	1.83e-25	4.27e-24	187.52	131.533	159.527	945.397	833.26	882.679	887.112
DDB_G0268772	3.13582	7.02062	2.55082	2.7523	0.00591776	0.0132711	10.4178	5.26131	7.83955	0	0	0	0
DDB_G0268774	8.29195	-2.20842	1.59916	-1.38098	0.167284	0.239175	0	5.26131	2.63066	11.7891	7.56296	16.8464	12.0661
DDB_G0268776	40.8308	-4.65849	1.48509	-3.13683	0.00170783	0.00435158	0	5.26131	2.63066	53.2777	79.6335	65.9815	66.2976
DDB_G0268778	628.179	-0.481699	0.289998	-1.66104	0.0967044	0.152489	588.605	426.166	507.386	730.925	823.473	571.723	708.707
DDB_G0268780	5.22986	7.75839	2.05563	3.77422	0.000160506	0.000511747	15.6267	10.5226	13.0747	0	0	0	0
DDB_G0268782	12.4381	-4.42207	1.52275	-2.904	0.00368432	0.0087232	0	0	0	18.1371	25.803	18.2502	20.7301
DDB_G0268784	30.9182	-5.74014	1.60022	-3.58709	0.000334394	0.000993283	0	0	0	28.7927	48.9368	76.8615	51.5303
DDB_G0268786	77.1906	-2.08676	0.486415	-4.29008	1.79e-05	6.75e-05	31.2534	21.0453	26.1493	111.316	113.889	108.448	111.218
DDB_G0268788	5.1725	0.0178738	1.22713	0.0145655	0.988379	0.991343	10.4178	0	5.2089	5.89456	5.33856	4.21159	5.14824
DDB_G0268790	882.491	2.29499	0.230657	9.94976	2.53e-23	5.08e-22	1369.94	2009.82	1689.88	353.22	329.211	350.264	344.232
DDB_G0268792	329.057	-2.07013	0.425402	-4.8663	1.14e-06	5.16e-06	62.5067	163.101	112.804	485.621	414.628	519.429	473.226
DDB_G0268794	51.0568	-1.02849	0.579343	-1.77527	0.0758526	0.123931	20.8356	42.0905	31.463	55.0915	53.3856	83.8808	64.1193
DDB_G0268796	6.76674	-3.5412	1.57117	-2.25386	0.0242051	0.0463445	0	0	0	9.06855	14.2362	10.529	11.2779
DDB_G0268798	16.191	-4.81297	1.49662	-3.21589	0.00130039	0.00339413	0	0	0	31.2865	25.803	23.8657	26.9851
DDB_G0268800	0	NA	NA	NA	NA	NA	0	0	0	0	0	0	0
DDB_G0268802	0.619603	-0.0896626	2.47251	-0.0362638	0.971072	0.978429	0	0	0	0.453428	0.88976	1.75483	1.03267
DDB_G0268806	16.8362	9.44456	3.95865	2.3858	0.0170418	0.0339545	0	84.181	42.0905	0	0	0	0
DDB_G0268808	37.194	-1.70907	0.646694	-2.64278	0.00822293	0.0177102	15.6267	15.7839	15.7053	46.0229	56.9446	51.592	51.5198
DDB_G0268810	1830.16	-0.465773	0.355954	-1.30852	0.190698	0.267836	1974.17	1004.91	1489.54	2161.72	1906.31	2103.69	2057.24
DDB_G0268812	0.0906855	2.4812	4.544	0.546038	0.58504	NA	0	0	0	0.453428	0	0	0.151143
DDB_G0268814	55.646	-0.503014	0.398537	-1.26215	0.206894	0.286785	41.6712	47.3518	44.5115	62.3463	62.2832	64.5777	63.0691
DDB_G0268816	180.204	2.4368	0.370936	6.56932	5.05e-11	3.8e-10	432.338	273.588	352.963	72.5484	48.4919	74.0538	65.0314
DDB_G0268818	55.2874	-2.67023	0.681818	-3.91634	8.99e-05	0.000301003	0	26.3066	13.1533	82.7505	86.3067	81.0731	83.3768
DDB_G0268820	16.1909	-0.0781233	0.832424	-0.0938504	0.925228	0.942998	20.8356	10.5226	15.6791	21.0844	18.685	9.82704	16.5321
DDB_G0268822	493.615	0.806564	0.172388	4.67879	2.89e-06	1.25e-05	744.872	584.006	664.439	397.203	364.357	377.639	379.733
DDB_G0268824	62.3456	-5.28887	1.48257	-3.56736	0.00036059	0.00106451	5.2089	0	2.60445	125.373	98.3185	82.8279	102.173
DDB_G0268826	16.2683	-0.946037	0.895509	-1.05642	0.290775	0.36769	5.2089	15.7839	10.4964	25.8454	20.4645	14.0386	20.1162
DDB_G0268828	438.276	4.35685	0.536656	8.11851	4.72e-16	5.64e-15	1510.58	531.393	1020.99	49.4236	41.3738	58.6113	49.8029
DDB_G0268830	0	NA	NA	NA	NA	NA	0	0	0	0	0	0	0
DDB_G0268832	0	NA	NA	NA	NA	NA	0	0	0	0	0	0	0
DDB_G0268834	1.04178	5.43537	4.56169	1.19152	0.233448	0.305271	5.2089	0	2.60445	0	0	0	0
DDB_G0268836	0	NA	NA	NA	NA	NA	0	0	0	0	0	0	0
DDB_G0268838	1.05226	5.44259	4.56113	1.19325	0.23277	0.305271	0	5.26131	2.63066	0	0	0	0
DDB_G0268840	0.458725	0.341397	4.44246	0.0768487	0.938744	NA	0	0	0	0	0.88976	1.40386	0.764541
DDB_G0268842	0	NA	NA	NA	NA	NA	0	0	0	0	0	0	0
DDB_G0268844	2.08356	6.43089	4.44712	1.44608	0.148155	0.215857	10.4178	0	5.2089	0	0	0	0
DDB_G0268846	71.2259	-0.675335	0.385174	-1.75333	0.0795461	0.129027	41.6712	63.1358	52.4035	80.7101	91.6453	78.9673	83.7742
DDB_G0268848	212.863	2.79593	0.271516	10.2975	7.23e-25	1.64e-23	395.876	478.78	437.328	58.0387	76.5194	55.1016	63.2199
DDB_G0268850	48.5311	3.88637	0.756997	5.13394	2.84e-07	1.41e-06	83.3423	136.794	110.068	7.25484	12.4566	2.80773	7.5064
DDB_G0268852	74.3478	1.93909	0.35353	5.48495	4.14e-08	2.27e-07	93.7601	173.623	133.692	36.5009	33.8109	34.0437	34.7852
DDB_G0268854	44.9854	0.793354	0.41341	1.91905	0.054978	0.0939974	67.7156	52.6131	60.1644	29.6995	35.5904	39.3082	34.866
DDB_G0268856	0.231072	1.30918	4.47553	0.292519	0.76989	NA	0	0	0	0.453428	0	0.701931	0.38512
DDB_G0268858	3.62417	-0.699171	1.66394	-0.420191	0.674346	0.735504	5.2089	0	2.60445	3.17399	6.22832	3.50966	4.30399
DDB_G0268860	222.864	-0.411806	0.246752	-1.66891	0.095136	0.150317	140.64	231.498	186.069	245.758	251.802	244.623	247.394
DDB_G0268862	118.891	-5.21712	1.05917	-4.92566	8.41e-07	3.9e-06	5.2089	5.26131	5.23511	187.039	164.606	232.339	194.661
DDB_G0268864	55.8866	0.95486	0.571842	1.6698	0.0949598	0.150081	41.6712	115.749	78.71	29.6995	44.9329	47.3804	40.6709
DDB_G0268866	16.2046	-1.47334	0.945011	-1.55908	0.118978	0.181443	0	15.7839	7.89197	23.5782	17.7952	23.8657	21.7464
DDB_G0268868	499.414	-3.53104	0.302986	-11.6541	2.19e-31	7.12e-30	52.089	84.181	68.135	781.029	808.347	771.423	786.933
DDB_G0268870	1387.72	0.293173	0.359059	0.816502	0.414213	0.492045	1057.41	2062.44	1559.92	1278.21	1158.47	1382.1	1272.93
DDB_G0268872	395.991	-0.168144	0.337119	-0.498769	0.617942	0.684949	479.218	257.804	368.511	365.689	443.1	434.145	414.311
DDB_G0268874	6.82939	1.25634	1.61606	0.777408	0.436918	0.515415	0	21.0453	10.5226	5.89456	0.88976	6.31738	4.36723
DDB_G0268876	402.812	0.336739	0.233232	1.4438	0.148796	0.216677	541.725	378.815	460.27	356.621	338.554	398.346	364.507
DDB_G0268878	9184.46	-7.98602	0.336876	-23.7061	3.12e-124	9.83e-122	36.4623	84.181	60.3217	15512.2	16098.9	14190.6	15267.2
DDB_G0268880	27.9563	-3.04605	1.05922	-2.87575	0.00403071	0.00946415	10.4178	0	5.2089	46.2496	39.5943	43.5197	43.1212
DDB_G0268882	0	NA	NA	NA	NA	NA	0	0	0	0	0	0	0
DDB_G0268884	4.52035	1.81029	1.27417	1.42076	0.155387	0.224644	10.4178	5.26131	7.83955	0.906855	3.55904	2.45676	2.30755
DDB_G0268886	221.608	0.370109	0.393412	0.940767	0.346824	0.425617	281.28	231.498	256.389	161.42	161.491	272.349	198.42
DDB_G0268888	264.153	1.57063	0.480992	3.2654	0.0010931	0.00290837	630.276	247.282	438.779	140.789	130.795	171.622	147.735
DDB_G0268890	74.268	-0.872386	0.806486	-1.08171	0.27938	0.355476	88.5512	10.5226	49.5369	107.689	92.9799	71.597	90.7553
DDB_G0268892	242.087	3.28176	0.347742	9.43735	3.82e-21	6.78e-20	406.294	641.88	524.087	45.3428	66.732	50.1881	54.0876
DDB_G0268894	0	NA	NA	NA	NA	NA	0	0	0	0	0	0	0
DDB_G0268896	9.37601	8.6003	4.26228	2.01777	0.0436153	0.0769843	46.8801	0	23.44	0	0	0	0
DDB_G0268898	500.029	-4.46418	0.404441	-11.0379	2.51e-28	6.97e-27	20.8356	52.6131	36.7244	799.166	785.213	842.318	808.899
DDB_G0268900	10.9695	-4.24376	1.51715	-2.79719	0.00515488	0.0118221	0	0	0	15.6433	17.7952	21.4089	18.2825
DDB_G0268902	11.3706	1.46524	0.750224	1.95307	0.0508108	0.0878386	15.6267	21.0453	18.336	5.66784	8.8976	5.61545	6.72697
DDB_G0268904	142.365	-2.12157	0.961795	-2.20584	0.027395	0.0511912	5.2089	89.4423	47.3256	283.166	169.054	164.954	205.725
DDB_G0268906	0	NA	NA	NA	NA	NA	0	0	0	0	0	0	0
DDB_G0268908	1.36012	2.35883	2.62804	0.897565	0.369418	0.447305	5.2089	0	2.60445	0	0.88976	0.701931	0.530564
DDB_G0268910	2.42457	3.3031	1.68627	1.95882	0.0501334	0.0867763	0	10.5226	5.26131	0.453428	0.44488	0.701931	0.533413
DDB_G0268914	602.069	-0.286024	0.319066	-0.896441	0.370018	0.447884	380.249	683.971	532.11	593.99	647.745	704.388	648.708
DDB_G0268916	16.4158	-2.19036	1.06912	-2.04874	0.0404871	0.0721959	5.2089	5.26131	5.23511	24.2584	23.1338	24.2166	23.8696
DDB_G0268918	1.49135	-1.36136	1.96828	-0.691649	0.489158	0.566501	0	0	0	2.49385	3.55904	1.40386	2.48558
DDB_G0268920	1142.88	2.30134	0.457533	5.02988	4.91e-07	2.34e-06	2776.34	1604.7	2190.52	329.415	368.361	635.599	444.458
DDB_G0268922	344.69	-2.31141	0.279742	-8.26266	1.42e-16	1.8e-15	119.805	84.181	101.993	502.398	472.018	545.05	506.488
DDB_G0268924	151.7	0.289764	0.231269	1.25293	0.210231	0.290793	177.102	163.101	170.102	132.854	146.81	138.631	139.432
DDB_G0268926	1.04178	5.43537	4.56169	1.19152	0.233448	0.305271	5.2089	0	2.60445	0	0	0	0
DDB_G0268928	354.83	0.00890645	0.225067	0.0395724	0.968434	0.976306	364.623	347.247	355.935	334.176	406.62	321.485	354.094
DDB_G0268930	0	NA	NA	NA	NA	NA	0	0	0	0	0	0	0
DDB_G0268932	0	NA	NA	NA	NA	NA	0	0	0	0	0	0	0
DDB_G0268934	8.09635	-0.0676526	0.969032	-0.0698146	0.944341	0.958143	5.2089	10.5226	7.86576	8.38841	9.34248	7.01931	8.25007
DDB_G0268938	53.663	0.863358	0.76067	1.135	0.256377	0.330756	20.8356	126.272	73.5536	37.8612	37.3699	45.9765	40.4025
DDB_G0268942	1.04178	5.43537	4.56169	1.19152	0.233448	0.305271	5.2089	0	2.60445	0	0	0	0
DDB_G0268944	1.05226	5.44259	4.56113	1.19325	0.23277	0.305271	0	5.26131	2.63066	0	0	0	0
DDB_G0268946	0.49629	0.232431	4.43993	0.0523501	0.95825	NA	0	0	0	0	1.77952	0.701931	0.82715
DDB_G0268948	325.056	0.546822	0.259334	2.10856	0.0349823	0.0634464	322.952	478.78	400.866	259.134	307.857	256.556	274.516
DDB_G0268950	10.0537	4.39951	1.55518	2.82894	0.00467023	0.0108162	46.8801	0	23.44	0.906855	1.77952	0.701931	1.12944
DDB_G0268958	13.0883	3.49687	0.923035	3.78845	0.000151588	0.000487965	31.2534	26.3066	28.78	0.906855	3.11416	3.86062	2.62721
DDB_G0268960	3.28622	4.76561	2.09094	2.27917	0.0226568	0.0437519	15.6267	0	7.81334	0.453428	0	0.350966	0.268131
DDB_G0268962	1.03527	-0.826739	2.28238	-0.362227	0.717183	0.77262	0	0	0	1.36028	3.11416	0.701931	1.72546
DDB_G0268964	2.30504	-1.99207	1.84752	-1.07824	0.280928	0.356998	0	0	0	4.08085	5.33856	2.10579	3.84173
DDB_G0268966	380.436	2.68854	0.243094	11.0597	1.97e-28	5.56e-27	880.303	662.926	771.614	115.397	106.326	137.228	119.65
DDB_G0268968	988.209	5.39536	0.623416	8.65451	4.95e-18	6.97e-17	3750.4	1020.7	2385.55	58.4922	45.8226	65.6306	56.6485
DDB_G0268970	89.1785	-2.1663	0.495891	-4.3685	1.25e-05	4.85e-05	20.8356	36.8292	28.8324	114.264	129.015	144.949	129.409
DDB_G0268974	0	NA	NA	NA	NA	NA	0	0	0	0	0	0	0
DDB_G0268978	0	NA	NA	NA	NA	NA	0	0	0	0	0	0	0
DDB_G0268980	0	NA	NA	NA	NA	NA	0	0	0	0	0	0	0
DDB_G0268982	7.11547	-3.62465	1.60861	-2.25328	0.0242416	0.0464063	0	0	0	14.5097	13.3464	7.72125	11.8591
DDB_G0268984	0	NA	NA	NA	NA	NA	0	0	0	0	0	0	0
DDB_G0268986	1.04178	5.43537	4.56169	1.19152	0.233448	0.305271	5.2089	0	2.60445	0	0	0	0
DDB_G0268988	54.8861	-0.112475	0.446853	-0.251704	0.80127	0.844417	31.2534	73.6584	52.4559	63.9333	52.9407	52.6449	56.5063
DDB_G0268990	31.6994	-1.14966	0.5969	-1.92605	0.0540977	0.0926502	15.6267	21.0453	18.336	41.2619	39.1494	41.414	40.6084
DDB_G0268992	4.51255	4.33333	1.52036	2.85019	0.00436924	0.0101725	5.2089	15.7839	10.4964	0.680141	0.88976	0	0.5233
DDB_G0268994	32.1263	0.885898	0.615059	1.44035	0.149769	0.21795	67.7156	21.0453	44.3805	27.6591	18.2401	25.9715	23.9569
DDB_G0268996	257.111	-6.34267	1.03146	-6.14924	7.79e-10	5.21e-09	5.2089	5.26131	5.23511	400.15	422.191	452.746	425.029
DDB_G0269000	97.8738	-0.571818	0.342434	-1.66986	0.0949462	0.150081	93.7601	57.8745	75.8173	124.012	106.326	107.395	112.578
DDB_G0269004	0.458725	0.341397	4.44246	0.0768487	0.938744	NA	0	0	0	0	0.88976	1.40386	0.764541
DDB_G0269006	423.62	1.20151	0.144597	8.30936	9.62e-17	1.23e-15	692.783	589.267	641.025	282.259	275.826	277.965	278.683
DDB_G0269008	1.04178	5.43537	4.56169	1.19152	0.233448	0.305271	5.2089	0	2.60445	0	0	0	0
DDB_G0269010	0	NA	NA	NA	NA	NA	0	0	0	0	0	0	0
DDB_G0269012	0	NA	NA	NA	NA	NA	0	0	0	0	0	0	0
DDB_G0269014	1013.61	-0.0858025	0.321146	-0.267176	0.789334	0.834227	708.41	1246.93	977.671	914.337	1088.62	1109.75	1037.57
DDB_G0269016	5340.82	0.524774	0.138285	3.79488	0.000147715	0.000476329	6964.29	6108.39	6536.34	4215.97	4868.32	4547.11	4543.8
DDB_G0269018	10.8673	3.29512	0.989349	3.3306	0.000866592	0.00235776	15.6267	31.5679	23.5973	2.04042	0.88976	4.21159	2.38059
DDB_G0269020	0	NA	NA	NA	NA	NA	0	0	0	0	0	0	0
DDB_G0269022	183.167	-0.39283	0.296608	-1.3244	0.185369	0.261349	177.102	131.533	154.318	234.875	185.96	186.363	202.399
DDB_G0269024	41.7057	-0.143514	0.43926	-0.326719	0.743881	0.79515	46.8801	31.5679	39.224	44.4359	44.9329	40.712	43.3603
DDB_G0269026	0.627961	-0.118792	4.14431	-0.0286638	0.977133	0.982831	0	0	0	1.36028	1.77952	0	1.0466
DDB_G0269028	0	NA	NA	NA	NA	NA	0	0	0	0	0	0	0
DDB_G0269030	0	NA	NA	NA	NA	NA	0	0	0	0	0	0	0
DDB_G0269032	153.943	-0.460933	0.307365	-1.49963	0.133711	0.200068	109.387	142.055	125.721	197.694	168.61	151.968	172.757
DDB_G0269034	150.723	-1.9618	0.505786	-3.87872	0.000105006	0.000346177	20.8356	89.4423	55.139	212.431	209.094	221.81	214.445
DDB_G0269036	2.09404	6.43756	2.87231	2.24125	0.02501	0.0472869	5.2089	5.26131	5.23511	0	0	0	0
DDB_G0269038	2118.05	-0.339427	0.0990154	-3.42802	0.000608006	0.00171203	1843.95	1809.89	1826.92	2222.02	2360.09	2354.28	2312.13
DDB_G0269040	877	0.1802	0.40482	0.445137	0.656221	0.719301	1239.72	647.142	943.429	755.184	693.568	1049.39	832.713
DDB_G0269042	1.35874	-1.23568	1.95419	-0.632321	0.527177	0.603378	0	0	0	2.72057	2.66928	1.40386	2.26457
DDB_G0269044	1.22365	-1.06417	2.382	-0.446754	0.655053	0.718377	0	0	0	0.453428	3.55904	2.10579	2.03942
DDB_G0269046	1322.2	1.72134	0.125727	13.691	1.15e-42	6.1e-41	2166.9	2378.11	2272.51	735.006	665.54	665.431	688.659
DDB_G0269048	795.351	-3.66192	0.280412	-13.0591	5.64e-39	2.66e-37	83.3423	115.749	99.5456	1297.71	1330.19	1149.76	1259.22
DDB_G0269050	443.725	6.85388	0.49259	13.914	5.21e-44	2.92e-42	921.975	1267.98	1094.98	9.52198	14.2362	4.91352	9.55722
DDB_G0269052	32.4094	0.30818	0.476908	0.646203	0.518148	0.594276	26.0445	47.3518	36.6982	29.9262	27.1377	31.5869	29.5503
DDB_G0269054	79.4964	-0.622445	0.522266	-1.19182	0.233333	0.305271	93.7601	26.3066	60.0333	101.568	83.1926	92.6549	92.4718
DDB_G0269056	12.5118	9.01692	2.34124	3.85134	0.000117475	0.000384876	57.2979	5.26131	31.2796	0	0	0	0
DDB_G0269058	1.04178	5.43537	4.56169	1.19152	0.233448	0.305271	5.2089	0	2.60445	0	0	0	0
DDB_G0269060	83.0292	2.01679	0.496066	4.06557	4.79e-05	0.000167903	218.774	84.181	151.477	39.4482	32.0314	40.712	37.3972
DDB_G0269062	119.622	-2.7988	0.497889	-5.62132	1.9e-08	1.08e-07	26.0445	26.3066	26.1755	190.44	161.936	193.382	181.919
DDB_G0269064	0	NA	NA	NA	NA	NA	0	0	0	0	0	0	0
DDB_G0269066	0	NA	NA	NA	NA	NA	0	0	0	0	0	0	0
DDB_G0269068	6.25067	8.0154	4.36807	1.835	0.066506	0.110807	31.2534	0	15.6267	0	0	0	0
DDB_G0269070	316.054	13.6754	1.2117	11.2862	1.54e-29	4.58e-28	859.468	720.8	790.134	0	0	0	0
DDB_G0269072	1.35532	-1.21665	2.01861	-0.602716	0.546698	0.620828	0	0	0	1.81371	3.55904	1.40386	2.25887
DDB_G0269074	0.272057	1.05354	4.46459	0.235978	0.81345	NA	0	0	0	1.36028	0	0	0.453428
DDB_G0269076	0	NA	NA	NA	NA	NA	0	0	0	0	0	0	0
DDB_G0269078	0.0453428	3.04447	4.56063	0.667554	0.504418	NA	0	0	0	0.226714	0	0	0.0755713
DDB_G0269080	1.05226	5.44259	4.56113	1.19325	0.23277	0.305271	0	5.26131	2.63066	0	0	0	0
DDB_G0269082	0	NA	NA	NA	NA	NA	0	0	0	0	0	0	0
DDB_G0269084	2.91099	-2.34059	1.67327	-1.39881	0.16187	0.232585	0	0	0	5.89456	4.4488	4.21159	4.85165
DDB_G0269086	1037.02	-4.02323	0.306835	-13.112	2.81e-39	1.35e-37	98.969	105.226	102.098	1423.99	1858.26	1698.67	1660.31
DDB_G0269088	6.20043	3.03405	1.33799	2.26761	0.0233532	0.044869	15.6267	10.5226	13.0747	0.453428	0.88976	3.50966	1.61761
DDB_G0269090	0	NA	NA	NA	NA	NA	0	0	0	0	0	0	0
DDB_G0269092	3.13582	7.02062	2.55082	2.7523	0.00591776	0.0132711	10.4178	5.26131	7.83955	0	0	0	0
DDB_G0269094	0	NA	NA	NA	NA	NA	0	0	0	0	0	0	0
DDB_G0269096	5.26131	7.76631	4.37559	1.77492	0.0759113	0.123931	0	26.3066	13.1533	0	0	0	0
DDB_G0269100	26576.2	2.45558	0.273616	8.97456	2.84e-19	4.39e-18	61298.3	43048.1	52173.2	7922.29	9545.79	11066.6	9511.58
DDB_G0269102	248.066	-1.03735	0.426983	-2.4295	0.0151198	0.0305216	88.5512	215.714	152.133	307.424	276.27	352.37	312.021
DDB_G0269104	48.1218	-1.25877	0.689642	-1.82525	0.0679639	0.112759	5.2089	47.3518	26.2804	69.8278	52.9407	65.2796	62.6827
DDB_G0269106	278.343	4.228	0.297508	14.2114	7.79e-46	4.6e-44	515.681	773.413	644.547	38.7681	29.807	34.0437	34.2062
DDB_G0269108	1.64266	1.38425	1.86561	0.741984	0.458097	0.535812	0	5.26131	2.63066	1.36028	0.88976	0.701931	0.983991
DDB_G0269110	618.066	1.73153	0.224473	7.71373	1.22e-14	1.29e-13	1265.76	862.856	1064.31	317.853	323.428	320.432	320.571
DDB_G0269112	21.0718	2.14106	0.840339	2.54786	0.0108387	0.0226757	20.8356	57.8745	39.355	8.1617	4.4488	14.0386	8.88304
DDB_G0269114	334.964	-1.14639	0.209766	-5.46509	4.63e-08	2.52e-07	161.476	226.237	193.856	416.7	437.317	433.092	429.036
DDB_G0269116	0	NA	NA	NA	NA	NA	0	0	0	0	0	0	0
DDB_G0269118	2074.5	3.14328	0.781861	4.02025	5.81e-05	0.000200974	7667.49	1199.58	4433.54	511.92	531.632	461.871	501.807
DDB_G0269120	392.377	1.75642	0.391573	4.48555	7.27e-06	2.94e-05	927.183	431.428	679.306	202.909	202.42	197.945	201.091
DDB_G0269122	6558.6	0.311888	0.416174	0.749418	0.453605	0.5318	4510.9	10338.5	7424.69	5429.34	6342.21	6172.08	5981.21
DDB_G0269124	8.29145	2.23396	0.827118	2.70089	0.00691536	0.0152298	10.4178	21.0453	15.7315	3.62742	3.55904	2.80773	3.3314
DDB_G0269126	175.203	-1.72836	0.320288	-5.39627	6.8e-08	3.64e-07	78.1334	68.3971	73.2653	225.354	263.369	240.762	243.162
DDB_G0269128	0	NA	NA	NA	NA	NA	0	0	0	0	0	0	0
DDB_G0269130	406.413	1.22804	0.357713	3.43304	0.000596859	0.00168365	817.797	420.905	619.351	273.19	281.164	239.008	264.454
DDB_G0269132	63.8964	3.32061	0.377754	8.79041	1.49e-18	2.19e-17	151.058	126.272	138.665	10.8823	15.1259	16.1444	14.0509
DDB_G0269134	107980	5.81362	0.202908	28.6515	1.53e-180	8.92e-178	289464	236412	262938	3985.4	5043.16	4997.4	4675.32
DDB_G0269136	41245.5	8.26133	0.129885	63.6051	0	0	105579	99644	102612	303.796	342.113	358.687	334.865
DDB_G0269138	11151.5	0.876064	0.198486	4.41372	1.02e-05	4.01e-05	17507.1	13174.3	15340.7	7692.85	8966.56	8416.86	8358.76
DDB_G0269140	940.854	-1.91525	0.179806	-10.6518	1.71e-26	4.24e-25	369.832	336.724	353.278	1309.27	1255.45	1432.99	1332.57
DDB_G0269142	908.842	0.703421	0.143446	4.90373	9.4e-07	4.33e-06	1234.51	1131.18	1182.85	774.454	729.158	674.907	726.173
DDB_G0269144	8850.72	1.20188	0.173056	6.94504	3.78e-12	3.18e-11	15053.7	11732.7	13393.2	5691.2	6173.15	5602.82	5822.39
DDB_G0269146	7301.19	0.809653	0.226672	3.57192	0.000354373	0.00104728	8448.83	11222.4	9835.61	4817.67	5882.2	6134.88	5611.58
DDB_G0269148	1212.91	0.0409403	0.165142	0.247909	0.804205	0.846782	1088.66	1378.46	1233.56	1136.97	1252.78	1207.67	1199.14
DDB_G0269150	1179.9	1.68221	0.145356	11.573	5.65e-31	1.8e-29	2125.23	1894.07	2009.65	590.136	681.111	608.925	626.724
DDB_G0269152	90.5805	0.640343	0.413133	1.54997	0.121149	0.184521	78.1334	152.578	115.356	71.1881	88.5311	62.4719	74.0637
DDB_G0269154	1892.46	-0.49936	0.159901	-3.12293	0.00179062	0.00454469	1369.94	1662.58	1516.26	2028.64	2094.94	2306.2	2143.26
DDB_G0269156	14992.2	3.03429	0.234731	12.9267	3.18e-38	1.42e-36	36852.9	26506.5	31679.7	3415.22	3901.6	4284.59	3867.13
DDB_G0269158	1685.1	1.33814	0.234525	5.70574	1.16e-08	6.79e-08	3094.08	2193.97	2644.03	1003.44	966.724	1167.31	1045.82
DDB_G0269160	9808.11	3.12556	0.190492	16.4078	1.68e-60	1.43e-58	19491.7	22355.3	20923.5	2033.62	2595.43	2564.51	2397.85
DDB_G0269162	318.128	1.67078	0.481358	3.47097	0.000518579	0.00148331	786.543	294.634	540.588	164.368	165.05	180.045	169.821
DDB_G0269164	527.316	0.900092	0.335602	2.68202	0.00731784	0.0159791	645.903	815.504	730.703	365.009	509.388	300.778	391.725
DDB_G0269166	1170.49	0.563868	0.102851	5.4824	4.2e-08	2.3e-07	1432.45	1473.17	1452.81	1007.97	953.378	985.512	982.286
DDB_G0269168	912.713	-1.81974	0.743025	-2.4491	0.0143215	0.0290323	104.178	620.835	362.507	1231.28	1311.51	1295.77	1279.52
DDB_G0269170	207.85	0.455192	0.501662	0.907367	0.364213	0.441827	364.623	131.533	248.078	162.1	172.169	208.825	181.031
DDB_G0269172	322.285	2.56176	0.476895	5.37175	7.8e-08	4.14e-07	927.183	357.769	642.476	105.875	102.322	118.275	108.824
DDB_G0269174	218.729	1.36827	0.282006	4.85193	1.22e-06	5.52e-06	265.654	426.166	345.91	128.773	126.346	146.704	133.941
DDB_G0269176	17.8361	9.52755	1.5975	5.96403	2.46e-09	1.57e-08	26.0445	63.1358	44.5901	0	0	0	0
DDB_G0269178	0	NA	NA	NA	NA	NA	0	0	0	0	0	0	0
DDB_G0269180	70.8639	1.19048	0.990024	1.20248	0.229178	0.305271	197.938	15.7839	106.861	38.5413	57.8344	44.2217	46.8658
DDB_G0269182	236.158	-1.0109	0.372594	-2.71314	0.00666497	0.0147608	109.387	184.146	146.766	285.886	359.908	241.464	295.753
DDB_G0269184	208.129	-0.390942	0.216678	-1.80425	0.0711919	0.117409	156.267	194.669	175.468	230.341	224.22	235.147	229.903
DDB_G0269186	101.696	0.491903	0.296524	1.6589	0.0971363	0.152973	93.7601	152.578	123.169	91.1389	81.8579	89.1453	87.3807
DDB_G0269188	306.975	-0.0480926	0.19706	-0.244051	0.807191	0.849359	296.907	305.156	301.032	318.533	284.723	329.557	310.938
DDB_G0269190	1070.28	-0.642983	0.189402	-3.3948	0.000686781	0.00190949	921.975	678.71	800.342	1187.07	1297.71	1265.93	1250.24
DDB_G0269192	216.609	-1.1416	0.257841	-4.42754	9.53e-06	3.77e-05	119.805	131.533	125.669	266.389	265.593	299.725	277.236
DDB_G0269194	1252.14	0.101535	0.326603	0.310882	0.75589	0.804815	932.392	1678.36	1305.38	1090.72	1276.81	1282.43	1216.65
DDB_G0269196	5186.24	0.392072	0.264385	1.48296	0.138085	0.205653	4807.81	7292.18	6050	4099.21	5056.06	4675.92	4610.4
DDB_G0269198	1173.73	-0.662907	0.176178	-3.7627	0.000168085	0.000531765	796.961	941.775	869.368	1238.76	1429.4	1461.77	1376.65
DDB_G0269200	1319.06	0.00794587	0.22061	0.0360178	0.971268	0.978448	1531.42	1115.4	1323.41	1321.74	1189.16	1437.56	1316.15
DDB_G0269202	1741.67	3.96771	0.585401	6.77776	1.22e-11	9.76e-11	1922.08	6024.21	3973.14	210.39	332.325	219.354	254.023
DDB_G0269204	160.013	-2.32117	0.370608	-6.26314	3.77e-10	2.59e-09	67.7156	26.3066	47.0111	236.916	232.227	236.902	235.348
DDB_G0269206	714.28	-1.96119	0.655193	-2.9933	0.00275979	0.00670243	416.712	105.226	260.969	816.17	1360.44	872.852	1016.49
DDB_G0269208	116.46	-1.99053	0.676545	-2.94219	0.00325896	0.00779806	62.5067	21.0453	41.776	162.327	235.342	101.078	166.249
DDB_G0269210	75.6931	7.895	0.806208	9.79277	1.21e-22	2.36e-21	239.609	136.794	188.202	1.36028	0	0.701931	0.687405
DDB_G0269212	558.779	0.0303039	0.297439	0.101883	0.91885	0.938751	510.472	620.835	565.653	442.999	688.229	531.362	554.197
DDB_G0269214	436.684	0.479652	0.180958	2.65063	0.00803419	0.0173715	489.636	562.961	526.298	409.218	349.231	372.375	376.941
DDB_G0269216	9.75044	2.19961	0.884253	2.48753	0.0128634	0.0264505	10.4178	26.3066	18.3622	2.94728	3.11416	5.96642	4.00929
DDB_G0269218	46.0396	-0.66139	0.822824	-0.803805	0.421509	0.499155	5.2089	63.1358	34.1723	58.4922	50.7163	52.6449	53.9511
DDB_G0269220	33.9755	-5.88055	1.47094	-3.99781	6.39e-05	0.000219356	0	0	0	63.0264	55.61	51.241	56.6258
DDB_G0269222	30.5525	1.26434	0.466368	2.71103	0.00670738	0.0148369	46.8801	47.3518	47.1159	20.4042	16.0157	22.1108	19.5103
DDB_G0269224	45.6506	0.598493	1.0559	0.566808	0.570845	0.642892	109.387	5.26131	57.3241	42.8489	34.2558	36.5004	37.8684
DDB_G0269226	845.565	1.58876	0.480128	3.30905	0.000936141	0.00252829	2005.42	815.504	1410.46	493.103	541.419	372.375	468.965
DDB_G0269228	38.5281	0.207358	0.456546	0.454187	0.649694	0.713707	31.2534	52.6131	41.9333	35.1406	32.9211	40.712	36.2579
DDB_G0269230	551.597	-0.17636	0.530722	-0.332301	0.739662	0.791583	250.027	773.413	511.72	576.987	618.828	538.732	578.182
DDB_G0269232	61.8963	1.75101	0.538249	3.25316	0.00114131	0.0030167	161.476	52.6131	107.044	33.5536	30.2518	31.5869	31.7975
DDB_G0269234	12087.8	10.8176	0.362839	29.8139	2.58e-195	1.9e-192	37217.6	23170.8	30194.2	13.6028	21.3542	15.7935	16.9168
DDB_G0269236	358.377	-0.62763	0.406572	-1.54371	0.122658	0.186334	161.476	378.815	270.145	425.995	401.282	424.318	417.198
DDB_G0269238	1157.09	1.96402	0.470085	4.17801	2.94e-05	0.000107126	3015.95	1162.75	2089.35	501.037	562.773	542.944	535.585
DDB_G0269240	267.802	1.07426	0.565123	1.90093	0.0573113	0.0973983	182.311	599.79	391.051	205.403	165.495	186.012	185.637
DDB_G0269242	2762.8	1.24978	0.126848	9.85259	6.68e-23	1.32e-21	4281.71	4188.01	4234.86	1622.82	1872.94	1848.54	1781.43
DDB_G0269244	84.9924	0.402712	0.299672	1.34384	0.179	0.253506	114.596	84.181	99.3884	71.1881	79.1886	75.8086	75.3951
DDB_G0269246	562.44	0.332946	0.179211	1.85785	0.0631906	0.106148	578.187	705.016	641.602	470.204	544.978	513.814	509.665
DDB_G0269248	1034.96	3.52378	0.374617	9.40635	5.14e-21	9.03e-20	1510.58	3067.35	2288.96	211.297	192.188	193.382	198.956
DDB_G0269250	750.816	0.912707	0.176647	5.16685	2.38e-07	1.19e-06	1010.53	1078.57	1044.55	506.479	535.191	623.315	554.995
DDB_G0269252	485.912	0.783709	0.20767	3.77382	0.000160767	0.000512431	583.396	715.539	649.468	424.408	359.463	346.754	376.875
DDB_G0269254	21.1806	-0.335808	0.694518	-0.483513	0.628732	0.694619	26.0445	10.5226	18.2836	20.631	19.5747	29.1302	23.1119
DDB_G0269256	76.2839	10.6651	1.42456	7.48655	7.07e-14	6.99e-13	286.489	94.7037	190.596	0.226714	0	0	0.0755713
DDB_G0269258	0	NA	NA	NA	NA	NA	0	0	0	0	0	0	0
DDB_G0269260	23.0869	9.89987	1.5783	6.27247	3.55e-10	2.45e-09	31.2534	84.181	57.7172	0	0	0	0
DDB_G0269262	12.2749	1.69037	0.675695	2.50168	0.0123607	0.0255596	15.6267	26.3066	20.9666	6.80141	6.6732	5.96642	6.48034
DDB_G0269264	4.30144	5.59961	2.19094	2.55581	0.0105942	0.0222102	20.8356	0	10.4178	0.226714	0.44488	0	0.223865
DDB_G0269266	23.0345	9.89703	1.36226	7.26515	3.73e-13	3.45e-12	57.2979	57.8745	57.5862	0	0	0	0
DDB_G0269268	9.42843	8.60812	1.65668	5.19601	2.04e-07	1.03e-06	20.8356	26.3066	23.5711	0	0	0	0
DDB_G0269270	63.4287	7.36037	0.630672	11.6707	1.8e-31	5.9e-30	156.267	157.839	157.053	0.906855	1.77952	0.350966	1.01245
DDB_G0269272	62.288	-1.25476	0.447705	-2.80264	0.00506867	0.0116534	31.2534	36.8292	34.0413	81.3903	75.6296	86.3376	81.1191
DDB_G0269274	66.5303	2.20725	0.450554	4.89897	9.63e-07	4.43e-06	171.894	78.9197	125.407	23.5782	31.5865	26.6734	27.2794
DDB_G0269276	141.745	3.54965	0.461511	7.69135	1.46e-14	1.52e-13	281.28	347.247	314.264	26.9789	16.0157	37.2024	26.7323
DDB_G0269278	6.00539	-0.310267	1.1493	-0.269961	0.78719	0.832519	5.2089	5.26131	5.23511	6.12127	7.11808	6.31738	6.51891
DDB_G0269280	5.16249	0.0317285	1.17238	0.0270634	0.978409	0.983667	5.2089	5.26131	5.23511	5.44113	5.33856	4.56255	5.11408
DDB_G0269282	418.182	0.595182	0.623105	0.955188	0.339483	0.418589	838.632	210.453	524.542	347.779	355.014	339.033	347.275
DDB_G0269284	123.435	0.441865	0.265867	1.66197	0.096518	0.152282	140.64	152.578	146.609	110.183	116.559	97.2175	107.986
DDB_G0269286	142.831	-0.487591	0.370844	-1.31481	0.188573	0.265324	156.267	73.6584	114.963	157.793	179.732	146.704	161.409
DDB_G0269288	520.277	-1.11289	0.196924	-5.65135	1.59e-08	9.17e-08	281.28	331.463	306.372	618.022	715.367	655.253	662.881
DDB_G0269290	5056.06	-0.985666	0.195321	-5.0464	4.5e-07	2.16e-06	3594.14	2772.71	3183.43	5661.5	6614.48	6637.46	6304.48
DDB_G0269292	382.077	0.76915	0.207513	3.70652	0.000210125	0.000650956	520.89	494.564	507.727	277.498	341.223	276.21	298.31
DDB_G0269294	50.912	-1.98513	0.622999	-3.1864	0.00144053	0.00372293	10.4178	26.3066	18.3622	74.8156	82.3028	60.7171	72.6118
DDB_G0269296	19.5033	-1.79481	0.890213	-2.01616	0.0437835	0.0772263	10.4178	5.26131	7.83955	27.2057	29.3621	25.2695	27.2791
DDB_G0269298	495.43	-0.182344	0.2457	-0.742139	0.458003	0.535812	369.832	547.177	458.504	516.001	475.577	568.564	520.047
DDB_G0269300	51.3282	-1.9984	0.597807	-3.34289	0.0008291	0.00226357	26.0445	10.5226	18.2836	68.4676	81.413	70.1931	73.3579
DDB_G0269302	30.9536	-4.256	1.51332	-2.81237	0.00491786	0.0113492	5.2089	0	2.60445	62.1196	35.1455	52.2939	49.853
DDB_G0269304	64.615	-3.26713	0.760141	-4.29805	1.72e-05	6.54e-05	0	21.0453	10.5226	110.636	96.9838	94.4098	100.677
DDB_G0269306	60.5462	-1.20056	0.477205	-2.51581	0.0118758	0.0246447	36.4623	31.5679	34.0151	81.617	86.7516	66.3325	78.2337
DDB_G0269308	14.9816	-0.773989	0.842082	-0.919138	0.358023	0.435519	15.6267	5.26131	10.444	14.5097	20.9094	18.6012	18.0067
DDB_G0269312	413.23	-4.41082	0.439784	-10.0295	1.13e-23	2.35e-22	36.4623	26.3066	31.3844	713.015	654.418	635.95	667.794
DDB_G0269318	0	NA	NA	NA	NA	NA	0	0	0	0	0	0	0
DDB_G0269320	0	NA	NA	NA	NA	NA	0	0	0	0	0	0	0
DDB_G0269322	93.804	0.602069	0.336255	1.79051	0.0733714	0.120445	83.3423	152.578	117.96	78.2163	83.6374	71.246	77.6999
DDB_G0269324	2.49513	-2.10169	1.71794	-1.22337	0.221188	0.304234	0	0	0	3.62742	5.33856	3.50966	4.15855
DDB_G0269326	125.688	1.17127	0.243487	4.81039	1.51e-06	6.74e-06	177.102	199.93	188.516	83.8841	90.3106	77.2125	83.8024
DDB_G0269328	131.89	2.88952	0.574197	5.03228	4.85e-07	2.31e-06	411.503	136.794	274.148	35.5941	45.3778	30.183	37.0516
DDB_G0269330	4.11577	-0.972769	1.61893	-0.600871	0.547926	0.621839	0	5.26131	2.63066	5.44113	3.55904	6.31738	5.10585
DDB_G0269332	489.695	2.08274	0.273987	7.60161	2.92e-14	2.98e-13	692.783	1115.4	904.091	213.564	224.22	202.507	213.43
DDB_G0269334	5743.39	4.24011	0.175749	24.1259	1.34e-128	4.76e-126	12803.5	13800.4	13301.9	601.698	746.954	764.403	704.352
DDB_G0269336	99.5642	-7.43067	1.45712	-5.09956	3.4e-07	1.66e-06	0	0	0	173.209	149.48	175.132	165.94
DDB_G0269338	93.5972	2.83274	0.539024	5.25531	1.48e-07	7.59e-07	286.489	99.965	193.227	23.5782	28.4723	29.4811	27.1772
DDB_G0269340	282.903	0.818795	0.288071	2.84234	0.00447842	0.0104091	411.503	352.508	382.005	201.775	266.928	181.8	216.834
DDB_G0269342	79.8468	-7.10967	1.45301	-4.89305	9.93e-07	4.55e-06	0	0	0	131.721	138.358	129.155	133.078
DDB_G0269344	433.699	-4.48157	0.579344	-7.7356	1.03e-14	1.09e-13	31.2534	31.5679	31.4106	622.556	975.622	507.496	701.891
DDB_G0269346	0.780482	-0.431796	2.26712	-0.19046	0.848948	0.883694	0	0	0	0.906855	0.88976	2.10579	1.3008
DDB_G0269348	78.9835	-1.19858	0.439472	-2.72733	0.00638501	0.0142064	36.4623	52.6131	44.5377	110.41	84.5272	110.905	101.947
DDB_G0269350	16.1708	3.01493	0.841107	3.58448	0.000337749	0.00100163	15.6267	52.6131	34.1199	3.62742	2.66928	6.31738	4.20469
DDB_G0269352	94.153	0.516594	0.556535	0.928232	0.353287	0.43108	177.102	52.6131	114.858	74.5888	76.9642	89.4962	80.3498
DDB_G0269354	127.416	1.36693	0.310322	4.40487	1.06e-05	4.16e-05	171.894	231.498	201.696	91.5924	66.2871	75.8086	77.896
DDB_G0269356	19.403	-0.484236	0.688331	-0.703493	0.481749	0.559484	15.6267	15.7839	15.7053	25.3919	20.9094	19.3031	21.8681
DDB_G0269358	160.576	-1.27924	0.51455	-2.48614	0.0129138	0.0265443	52.089	121.01	86.5496	236.236	248.243	145.3	209.926
DDB_G0269360	12.3622	4.29311	0.883635	4.85846	1.18e-06	5.36e-06	41.6712	15.7839	28.7276	1.36028	0.88976	2.10579	1.45195
DDB_G0269362	167.855	0.287058	0.251265	1.14245	0.253267	0.327541	229.191	147.317	188.254	160.967	149.48	152.319	154.255
DDB_G0269364	1108.52	3.41673	0.185892	18.3802	1.89e-75	2.25e-73	2724.25	2136.09	2430.17	230.568	209.538	242.166	227.424
DDB_G0269368	64.3018	2.02646	0.598967	3.38326	0.000716303	0.00198308	177.102	57.8745	117.488	32.6468	32.4762	21.4089	28.844
DDB_G0269370	46.8333	-1.84671	0.623683	-2.96097	0.00306676	0.00738296	31.2534	5.26131	18.2573	68.4676	71.6257	57.5584	65.8839
DDB_G0269372	212.278	0.435369	0.309548	1.40647	0.159586	0.229842	187.52	315.679	251.6	167.315	182.401	208.474	186.063
DDB_G0269374	163.157	-4.33089	0.66053	-6.55669	5.5e-11	4.12e-10	10.4178	15.7839	13.1009	274.55	258.475	256.556	263.194
DDB_G0269376	30.435	-2.05916	0.801271	-2.56987	0.0101736	0.0214429	5.2089	15.7839	10.4964	43.0756	51.6061	36.5004	43.7274
DDB_G0269378	349.816	3.42505	0.164634	20.804	3.98e-96	6.86e-94	713.619	820.765	767.192	69.6011	73.8501	71.246	71.5657
DDB_G0269380	2470.59	0.78803	0.328751	2.39704	0.0165281	0.0330921	4005.64	2604.35	3305	1626.44	2399.24	1717.28	1914.32
DDB_G0269382	3405.65	0.490019	0.170916	2.86702	0.00414359	0.0097003	4229.62	4003.86	4116.74	2548.04	2997.16	3249.59	2931.59
DDB_G0269384	6.73943	-3.54682	1.53085	-2.31689	0.0205099	0.0400972	0	0	0	11.7891	10.6771	11.2309	11.2324
DDB_G0269386	6.27164	8.02063	1.99574	4.01887	5.85e-05	0.000201772	20.8356	10.5226	15.6791	0	0	0	0
DDB_G0269388	710.26	-0.533774	0.221457	-2.41028	0.0159404	0.0320608	614.65	505.086	559.868	793.952	714.922	922.689	810.521
DDB_G0269390	0	NA	NA	NA	NA	NA	0	0	0	0	0	0	0
DDB_G0269392	1.04178	5.43537	4.56169	1.19152	0.233448	0.305271	5.2089	0	2.60445	0	0	0	0
DDB_G0269394	52.0202	-1.40283	0.504748	-2.77927	0.00544819	0.0124285	31.2534	21.0453	26.1493	69.3744	73.8501	64.5777	69.2674
DDB_G0269398	25.0833	-0.15574	0.589542	-0.264171	0.791648	0.835872	20.8356	26.3066	23.5711	30.1529	21.7991	26.3224	26.0915
DDB_G0269400	199.252	2.37131	0.690091	3.43622	0.000589882	0.00166658	635.485	136.794	386.14	68.4676	78.2989	77.2125	74.6596
DDB_G0269402	1.13246	3.90051	3.55881	1.09601	0.273073	0.348944	5.2089	0	2.60445	0.453428	0	0	0.151143
DDB_G0269404	140.241	3.33351	0.773792	4.30801	1.65e-05	6.27e-05	520.89	89.4423	305.166	28.5659	32.4762	29.8321	30.2914
DDB_G0269406	249.363	4.9194	0.235903	20.8535	1.42e-96	2.48e-94	656.321	531.393	593.857	19.4974	21.3542	18.2502	19.7006
DDB_G0269408	1.05226	5.44259	4.56113	1.19325	0.23277	0.305271	0	5.26131	2.63066	0	0	0	0
DDB_G0269410	2357.2	-4.07051	0.288757	-14.0967	3.98e-45	2.29e-43	291.698	157.839	224.769	3508.4	3906.05	3922.04	3778.83
DDB_G0269412	290.841	-1.46594	0.255391	-5.73999	9.47e-09	5.61e-08	166.685	115.749	141.217	378.612	422.191	370.971	390.591
DDB_G0269414	457.452	-2.20892	0.344352	-6.41471	1.41e-10	1.01e-09	88.5512	199.93	144.241	683.542	650.859	664.378	666.26
DDB_G0269416	32.8618	-3.29615	1.05754	-3.11681	0.00182822	0.00462947	5.2089	5.26131	5.23511	57.3586	48.047	48.4333	51.2796
DDB_G0269418	37.0482	-6.00293	1.46048	-4.11025	3.95e-05	0.000140772	0	0	0	61.2127	60.5037	63.5248	61.7471
DDB_G0269420	6.22002	1.64412	1.18901	1.38276	0.166739	0.238495	0	21.0453	10.5226	3.17399	2.66928	4.21159	3.35162
DDB_G0269422	0	NA	NA	NA	NA	NA	0	0	0	0	0	0	0
DDB_G0269424	256.198	0.365373	0.271693	1.3448	0.17869	0.253193	244.818	347.247	296.032	225.127	201.976	261.82	229.641
DDB_G0269426	100.018	2.20999	0.29372	7.52414	5.31e-14	5.3e-13	161.476	215.714	188.595	35.5941	44.488	42.8178	40.9666
DDB_G0269428	0	NA	NA	NA	NA	NA	0	0	0	0	0	0	0
DDB_G0269430	240.352	-0.632509	0.239413	-2.64192	0.00824384	0.0177483	145.849	215.714	180.781	288.153	289.172	262.873	280.066
DDB_G0269432	221.807	0.910947	0.312045	2.91928	0.00350842	0.0083425	395.876	220.975	308.426	172.076	166.385	153.723	164.061
DDB_G0269434	0	NA	NA	NA	NA	NA	0	0	0	0	0	0	0
DDB_G0269436	6.28213	8.02255	1.88412	4.25797	2.06e-05	7.68e-05	15.6267	15.7839	15.7053	0	0	0	0
DDB_G0269438	568.603	-1.01065	0.1685	-5.99791	2e-09	1.28e-08	312.534	394.599	353.566	713.922	690.899	731.062	711.961
DDB_G0269440	56.0327	-1.05065	0.489261	-2.14743	0.0317591	0.0583095	15.6267	52.6131	34.1199	66.4271	77.4091	68.0873	70.6412
DDB_G0269442	238.734	-1.52154	0.294677	-5.16342	2.42e-07	1.21e-06	109.387	115.749	112.568	344.152	279.385	344.999	322.845
DDB_G0269444	784.943	1.71646	0.193428	8.87391	7.06e-19	1.06e-17	1526.21	1168.01	1347.11	396.749	444.88	388.87	410.166
DDB_G0269446	5.79587	3.78613	1.617	2.34145	0.0192088	0.0378011	26.0445	0	13.0222	0.453428	1.77952	0.701931	0.978293
DDB_G0269448	70.0455	0.638869	0.42883	1.48979	0.136278	0.203358	52.089	126.272	89.1803	52.1442	60.0588	59.6642	57.289
DDB_G0269450	5.52394	-0.121143	1.1957	-0.101316	0.9193	0.938863	0	10.5226	5.26131	5.44113	5.33856	6.31738	5.69902
DDB_G0269452	71.7679	2.88951	0.52766	5.47608	4.35e-08	2.37e-07	161.476	136.794	149.135	21.3111	28.0274	11.2309	20.1898
DDB_G0269454	375.71	0.0623478	0.411275	0.151596	0.879505	0.907288	239.609	531.393	385.501	343.471	419.077	344.999	369.183
DDB_G0269456	0	NA	NA	NA	NA	NA	0	0	0	0	0	0	0
DDB_G0269458	1898.26	5.95657	0.385461	15.4531	7.19e-54	5.4e-52	6000.65	3267.28	4633.96	92.2725	64.0627	67.0344	74.4566
DDB_G0269460	689.99	-1.62645	0.173637	-9.36692	7.47e-21	1.3e-19	260.445	352.508	306.476	950.838	934.693	951.468	945.666
DDB_G0269462	1533.14	1.94518	0.214497	9.06856	1.21e-19	1.9e-18	2286.71	3230.45	2758.58	744.301	680.222	724.042	716.188
DDB_G0269464	8.4301	-2.24165	1.62986	-1.37536	0.169019	0.241194	0	5.26131	2.63066	17.2302	6.6732	12.9857	12.2964
DDB_G0269466	123.615	-1.71162	0.39209	-4.36538	1.27e-05	4.91e-05	67.7156	36.8292	52.2724	192.253	161.936	159.338	171.176
DDB_G0269468	0	NA	NA	NA	NA	NA	0	0	0	0	0	0	0
DDB_G0269470	347.72	-3.16688	0.647692	-4.88949	1.01e-06	4.62e-06	98.969	21.0453	60.0071	531.19	690.454	396.942	539.529
DDB_G0269472	663.518	0.542996	0.504535	1.07623	0.281824	0.357937	1213.67	420.905	817.289	557.943	566.332	558.737	561.004
DDB_G0269474	1084.69	1.55746	0.114825	13.5638	6.57e-42	3.42e-40	1677.26	1915.12	1796.19	603.285	622.387	605.416	610.363
DDB_G0269476	15.9521	6.56719	1.03199	6.36359	1.97e-10	1.39e-09	31.2534	47.3518	39.3026	0.453428	0	0.701931	0.38512
DDB_G0269478	0	NA	NA	NA	NA	NA	0	0	0	0	0	0	0
DDB_G0269480	2.10453	6.44403	4.44606	1.44938	0.147232	0.215857	0	10.5226	5.26131	0	0	0	0
DDB_G0269482	650.918	5.16993	0.450173	11.4843	1.58e-30	4.97e-29	2166.9	957.559	1562.23	48.0633	46.2675	35.7985	43.3764
DDB_G0269484	0	NA	NA	NA	NA	NA	0	0	0	0	0	0	0
DDB_G0269486	66.0909	0.170129	0.408039	0.416942	0.67672	0.737597	41.6712	99.965	70.8181	58.4922	65.3974	64.9287	62.9394
DDB_G0269488	28.6734	-1.9674	0.773096	-2.54483	0.0109329	0.022847	15.6267	5.26131	10.444	44.2092	38.2597	40.0101	40.8263
DDB_G0269492	0	NA	NA	NA	NA	NA	0	0	0	0	0	0	0
DDB_G0269494	0	NA	NA	NA	NA	NA	0	0	0	0	0	0	0
DDB_G0269496	260.47	1.302	0.470784	2.76561	0.00568166	0.0129107	583.396	226.237	404.816	150.991	162.381	179.343	164.239
DDB_G0269498	0	NA	NA	NA	NA	NA	0	0	0	0	0	0	0
DDB_G0269500	34.7439	0.297543	0.645052	0.46127	0.644605	0.708963	62.5067	15.7839	39.1453	39.6749	28.0274	27.7263	31.8095
DDB_G0269502	143.362	-4.46961	0.733684	-6.09201	1.11e-09	7.33e-09	5.2089	15.7839	10.4964	232.608	229.113	234.094	231.939
DDB_G0269504	4.62238	-2.98894	1.76776	-1.6908	0.090875	0.144141	0	0	0	4.08085	12.0118	7.01931	7.70397
DDB_G0269506	6.08502	-1.67048	1.68248	-0.992866	0.320775	0.398774	0	5.26131	2.63066	7.25484	13.3464	4.56255	8.38793
DDB_G0269508	4.28184	0.537669	1.35126	0.397901	0.690703	0.750138	5.2089	5.26131	5.23511	3.40071	5.78344	1.75483	3.64633
DDB_G0269510	121.07	-0.0142312	0.299822	-0.0474656	0.962142	0.97156	104.178	136.794	120.486	124.239	106.771	133.367	121.459
DDB_G0269512	26.9482	1.81524	0.830408	2.18597	0.0288181	0.0535063	15.6267	78.9197	47.2732	12.696	8.8976	18.6012	13.3983
DDB_G0269514	15.2809	-2.06985	1.07779	-1.92045	0.0548005	0.0937375	10.4178	0	5.2089	21.5378	22.6889	21.7599	21.9955
DDB_G0269516	0.0701931	3.01237	4.55954	0.660674	0.508821	NA	0	0	0	0	0	0.350966	0.116989
DDB_G0269518	2643.96	9.05067	0.527276	17.165	4.86e-66	4.96e-64	3865	9317.79	6591.39	14.5097	8.45272	14.0386	12.3337
DDB_G0269520	906.319	6.60545	0.633382	10.4288	1.83e-25	4.27e-24	927.183	3535.6	2231.39	20.4042	23.1338	25.2695	22.9358
DDB_G0269522	128.075	1.83839	0.44204	4.15888	3.2e-05	0.000115741	135.431	315.679	225.555	62.1196	70.291	56.8564	63.089
DDB_G0269526	298.26	1.06638	0.171257	6.2268	4.76e-10	3.24e-09	479.218	389.337	434.278	204.496	213.987	204.262	207.582
DDB_G0269528	6.86369	3.93923	1.57151	2.50666	0.0121879	0.0252355	26.0445	5.26131	15.6529	0.906855	0	2.10579	1.00422
DDB_G0269530	17.0858	0.183025	0.725174	0.252387	0.800742	0.843983	20.8356	15.7839	18.3098	11.3357	19.5747	17.8992	16.2699
DDB_G0269532	10.4388	8.75573	1.98702	4.40648	1.05e-05	4.13e-05	41.6712	10.5226	26.0969	0	0	0	0
DDB_G0269534	0	NA	NA	NA	NA	NA	0	0	0	0	0	0	0
DDB_G0269536	2.32782	3.89379	2.36001	1.64991	0.0989619	0.155427	0	10.5226	5.26131	0.226714	0.88976	0	0.372158
DDB_G0269538	0.0906855	2.4812	4.544	0.546038	0.58504	NA	0	0	0	0.453428	0	0	0.151143
DDB_G0269540	1.61012	-1.47533	3.7557	-0.392825	0.694449	0.753497	0	0	0	2.26714	5.78344	0	2.68353
DDB_G0269542	5.22986	7.75839	2.05563	3.77422	0.000160506	0.000511747	15.6267	10.5226	13.0747	0	0	0	0
DDB_G0269544	20.7149	-0.612091	0.682659	-0.896628	0.369917	0.447861	10.4178	21.0453	15.7315	24.7118	26.6928	20.707	24.0372
DDB_G0269546	234.599	-1.21502	0.248977	-4.88006	1.06e-06	4.84e-06	161.476	99.965	130.72	296.088	306.967	308.499	303.851
DDB_G0269548	19.0192	1.92868	0.557541	3.45926	0.00054167	0.00154256	31.2534	36.8292	34.0413	8.61512	10.6771	7.72125	9.0045
DDB_G0269550	54.086	-2.63796	0.691752	-3.81345	0.00013704	0.000444504	5.2089	21.0453	13.1271	82.0704	72.9603	89.1453	81.392
DDB_G0269552	14.9262	-0.770794	0.946095	-0.814711	0.415238	0.492944	0	21.0453	10.5226	17.6837	13.7913	22.1108	17.8619
DDB_G0269554	108.229	-0.0804677	0.297586	-0.270401	0.786851	0.832321	93.7601	115.749	104.755	113.357	99.6531	118.626	110.545
DDB_G0269556	298.329	-1.22835	0.430932	-2.85046	0.00436563	0.0101684	93.7601	236.759	165.26	368.637	430.644	361.846	387.042
DDB_G0269558	0.318338	0.876227	4.45804	0.19655	0.84418	NA	0	0	0	0	0.88976	0.701931	0.530564
DDB_G0269560	14.0566	-1.92735	1.09376	-1.76214	0.0780453	0.126816	0	10.5226	5.26131	20.8577	21.3542	17.5483	19.9201
DDB_G0269562	3.47855	3.81684	2.08759	1.82835	0.0674978	0.11212	0	15.7839	7.89197	0.906855	0	0.701931	0.536262
DDB_G0269564	135.893	-0.795092	0.365569	-2.17494	0.0296345	0.0548375	57.2979	131.533	94.4154	173.436	152.594	164.603	163.544
DDB_G0269566	0	NA	NA	NA	NA	NA	0	0	0	0	0	0	0
DDB_G0269568	32.2555	0.506965	0.465719	1.08857	0.276346	0.352424	41.6712	36.8292	39.2502	26.9789	24.9133	30.885	27.5924
DDB_G0269570	32.889	-2.18884	0.835792	-2.61889	0.00882174	0.018882	0	21.0453	10.5226	50.3305	55.1651	37.9043	47.8
DDB_G0269572	92.1031	3.7297	0.311594	11.9697	5.12e-33	1.78e-31	171.894	242.02	206.957	15.87	14.2362	16.4954	15.5338
DDB_G0269574	172.643	-0.216074	0.475832	-0.454097	0.649759	0.713707	83.3423	231.498	157.42	177.517	200.641	170.218	182.792
DDB_G0269576	88.9509	1.52577	0.517886	2.94615	0.00321758	0.0077074	213.565	78.9197	146.242	59.6257	49.8266	42.8178	50.7567
DDB_G0269578	0	NA	NA	NA	NA	NA	0	0	0	0	0	0	0
DDB_G0269580	109.494	1.01983	0.36662	2.78172	0.00540724	0.0123418	104.178	210.453	157.315	73.9087	84.5272	74.4047	77.6135
DDB_G0269582	146.316	2.95061	0.278739	10.5856	3.48e-26	8.43e-25	250.027	363.031	306.529	41.2619	35.1455	42.1159	39.5078
DDB_G0269584	10.6454	-1.4453	1.11951	-1.29101	0.196701	0.27511	10.4178	0	5.2089	14.5097	16.0157	12.2838	14.2697
DDB_G0269586	1.04178	5.43537	4.56169	1.19152	0.233448	0.305271	5.2089	0	2.60445	0	0	0	0
DDB_G0269588	513.542	1.56707	0.263363	5.95024	2.68e-09	1.69e-08	1041.78	662.926	852.352	301.529	292.286	269.191	287.669
DDB_G0269590	167.486	2.46968	0.265036	9.31829	1.18e-20	2.02e-19	375.04	284.111	329.576	58.4922	52.051	67.7364	59.4265
DDB_G0269592	21.3496	2.9001	0.520596	5.57074	2.54e-08	1.43e-07	46.8801	42.0905	44.4853	6.12127	5.33856	6.31738	5.92574
DDB_G0269594	329.701	-0.0399191	0.230001	-0.17356	0.862211	0.893791	390.667	257.804	324.236	347.099	319.869	333.066	333.345
DDB_G0269596	74.622	4.19183	0.46049	9.10298	8.79e-20	1.4e-18	213.565	131.533	172.549	10.2021	6.22832	11.5819	9.33744
DDB_G0269598	0	NA	NA	NA	NA	NA	0	0	0	0	0	0	0
DDB_G0269600	41.4044	-1.39528	0.566099	-2.46472	0.0137119	0.0279609	20.8356	21.0453	20.9404	58.2654	57.3895	49.4862	55.047
DDB_G0269602	70.5636	-0.560769	0.381368	-1.47042	0.141449	0.21008	41.6712	68.3971	55.0341	87.965	76.5194	78.2653	80.9166
DDB_G0269604	0	NA	NA	NA	NA	NA	0	0	0	0	0	0	0
DDB_G0269606	10.3646	0.620177	1.04391	0.594089	0.552453	0.625561	0	26.3066	13.1533	9.97541	7.11808	8.42318	8.50555
DDB_G0269608	186.658	-0.469323	0.278812	-1.6833	0.0923177	0.14624	177.102	126.272	151.687	229.661	213.542	186.714	209.972
DDB_G0269610	2075.25	0.595809	0.299912	1.98662	0.046965	0.0820938	3271.19	1936.16	2603.68	1561.15	1796.43	1811.33	1722.97
DDB_G0269614	1569.97	0.891345	0.296832	3.00286	0.00267456	0.00650976	1619.97	2720.1	2170.03	1065.78	1244.77	1199.25	1169.94
DDB_G0269616	24.3849	0.184484	1.19792	0.154003	0.877607	0.905829	0	52.6131	26.3066	27.2057	18.2401	23.8657	23.1038
DDB_G0269618	1.37402	2.22942	2.40485	0.927055	0.353898	0.431638	0	5.26131	2.63066	0.906855	0	0.701931	0.536262
DDB_G0269620	41.7168	4.25244	0.696361	6.10666	1.02e-09	6.74e-09	125.013	68.3971	96.7053	4.08085	2.66928	8.42318	5.05777
DDB_G0269622	0.586976	0.00424405	2.51786	0.00168557	0.998655	NA	0	0	0	0.453428	1.77952	0.701931	0.978293
DDB_G0269624	289.158	-0.50965	0.22619	-2.2532	0.0242466	0.0464078	182.311	278.85	230.581	318.533	338.999	327.1	328.21
DDB_G0269626	393.744	-1.9936	0.390596	-5.104	3.33e-07	1.63e-06	197.938	84.181	141.06	510.559	553.431	622.613	562.201
DDB_G0269628	626.903	0.287837	0.551106	0.522291	0.601468	0.670268	348.996	1057.52	703.26	631.625	641.517	454.852	575.998
DDB_G0269630	260.284	0.877742	0.309447	2.83648	0.00456134	0.010584	380.249	336.724	358.487	223.993	146.366	214.089	194.816
DDB_G0269632	95.0353	-0.2911	0.315916	-0.921448	0.356817	0.43443	62.5067	105.226	83.8665	105.422	104.102	97.9194	102.481
DDB_G0269634	0	NA	NA	NA	NA	NA	0	0	0	0	0	0	0
DDB_G0269636	150.914	-1.16488	0.378083	-3.08102	0.00206294	0.00516109	57.2979	115.749	86.5234	202.229	213.987	165.305	193.84
DDB_G0269638	89.0654	0.0720769	0.48877	0.147466	0.882764	0.90946	46.8801	136.794	91.8371	96.1267	79.1886	86.3376	87.2176
DDB_G0269640	121.646	-3.88895	0.661107	-5.88248	4.04e-09	2.51e-08	10.4178	15.7839	13.1009	188.853	196.637	196.541	194.01
DDB_G0269642	93.7696	-2.4072	0.494392	-4.86901	1.12e-06	5.09e-06	41.6712	10.5226	26.0969	138.069	145.921	132.665	138.885
DDB_G0269644	130.502	-0.0942317	0.451224	-0.208836	0.834576	0.871363	182.311	68.3971	125.354	134.215	143.696	123.891	133.934
DDB_G0269646	13.9208	-3.03516	1.48606	-2.04242	0.0411104	0.0731178	0	5.26131	2.63066	22.4447	22.244	19.6541	21.4476
DDB_G0269648	0.0906855	2.4812	4.544	0.546038	0.58504	NA	0	0	0	0.453428	0	0	0.151143
DDB_G0269650	0	NA	NA	NA	NA	NA	0	0	0	0	0	0	0
DDB_G0269652	40.8513	1.0984	0.510128	2.15319	0.0313038	0.0575407	88.5512	31.5679	60.0596	28.3392	24.9133	30.885	28.0458
DDB_G0269654	1.59731	1.50947	1.85959	0.811719	0.416953	0.494448	0	5.26131	2.63066	1.13357	0.88976	0.701931	0.90842
DDB_G0269656	5.21938	7.75583	2.37523	3.2653	0.00109347	0.00290837	20.8356	5.26131	13.0484	0	0	0	0
DDB_G0269658	69.2134	-5.44141	1.45485	-3.74018	0.000183886	0.000576629	0	5.26131	2.63066	121.745	111.665	107.395	113.602
DDB_G0269662	2.08356	6.43089	4.44712	1.44608	0.148155	0.215857	10.4178	0	5.2089	0	0	0	0
DDB_G0269664	578.789	0.7024	0.482469	1.45584	0.145436	0.215017	406.294	1099.61	752.954	447.306	452.888	487.842	462.679
DDB_G0269666	0.893369	-0.647135	2.3994	-0.269707	0.787386	0.832646	0	0	0	2.26714	0.44488	1.75483	1.48895
DDB_G0269668	176.813	-0.502796	0.236522	-2.12579	0.0335209	0.0610769	135.431	147.317	141.374	193.16	201.086	207.07	200.439
DDB_G0269670	1552.65	1.46091	0.274381	5.3244	1.01e-07	5.3e-07	3099.29	1925.64	2512.47	914.11	967.169	857.058	912.779
DDB_G0269672	0	NA	NA	NA	NA	NA	0	0	0	0	0	0	0
DDB_G0269674	0.177952	1.74604	4.49921	0.388076	0.697959	NA	0	0	0	0	0.88976	0	0.296587
DDB_G0269676	17.1213	-3.36231	1.57609	-2.13333	0.0328977	0.0601499	5.2089	0	2.60445	36.0475	15.5708	28.7792	26.7992
DDB_G0269678	182.198	0.913919	0.33825	2.7019	0.00689439	0.0151938	333.369	173.623	253.496	129.227	142.806	131.963	134.665
DDB_G0269680	40.3603	1.14819	0.395878	2.90037	0.00372721	0.00881151	72.9245	47.3518	60.1382	27.4324	28.4723	25.6205	27.1751
DDB_G0269682	2528.51	-0.731997	0.170513	-4.2929	1.76e-05	6.68e-05	2015.84	1604.7	1810.27	2818.96	3219.15	2983.91	3007.34
DDB_G0269684	24.1421	-0.930778	0.755866	-1.23141	0.218171	0.300496	20.8356	10.5226	15.6791	40.1283	25.3582	23.8657	29.7841
DDB_G0269686	365.404	2.0741	0.564228	3.676	0.000236923	0.000727443	1031.36	315.679	673.52	143.963	161.936	174.079	159.993
DDB_G0269688	714.85	-5.22015	0.435953	-11.9741	4.86e-33	1.7e-31	41.6712	21.0453	31.3582	1227.2	1174.93	1109.4	1170.51
DDB_G0269692	17.8035	-3.41542	1.48632	-2.2979	0.0215673	0.041906	5.2089	0	2.60445	29.2461	30.6967	23.8657	27.9362
DDB_G0269694	891.683	0.3534	0.213032	1.6589	0.0971356	0.152973	1203.25	847.072	1025.16	757.904	824.363	825.822	802.696
DDB_G0269696	119.645	-0.774036	0.460058	-1.68247	0.0924768	0.146429	41.6712	126.272	83.9714	142.603	137.468	150.213	143.428
DDB_G0269698	36.5828	4.69982	0.494178	9.51037	1.9e-21	3.47e-20	93.7601	78.9197	86.3399	2.72057	4.00392	3.50966	3.41138
DDB_G0269700	186.856	4.75297	0.240792	19.7389	9.99e-87	1.53e-84	416.712	468.257	442.484	16.7768	17.7952	14.7406	16.4375
DDB_G0269702	0	NA	NA	NA	NA	NA	0	0	0	0	0	0	0
DDB_G0269704	158.469	-0.0235056	0.231655	-0.101468	0.919179	0.938863	166.685	147.317	157.001	165.728	157.488	155.127	159.447
DDB_G0269706	22.6467	1.74378	0.68158	2.55844	0.0105142	0.0220553	41.6712	36.8292	39.2502	15.87	6.22832	12.6348	11.5777
DDB_G0269708	2370.89	1.70364	0.49674	3.42965	0.000604362	0.00170308	5922.51	2193.97	4058.24	1066.46	1281.7	1389.82	1246
DDB_G0269710	165.321	2.36478	0.493554	4.79134	1.66e-06	7.38e-06	177.102	462.996	320.049	59.1723	71.1808	56.1545	62.1692
DDB_G0269712	892.007	-0.976528	0.427032	-2.28678	0.0222088	0.0429995	791.752	336.724	564.238	1032.68	1230.54	1068.34	1110.52
DDB_G0269714	357.75	-1.02447	0.922666	-1.11034	0.266853	0.342503	36.4623	405.121	220.792	449.347	484.029	413.789	449.055
DDB_G0269716	723.965	-0.409225	0.17992	-2.27448	0.0229372	0.0441929	515.681	694.494	605.087	827.732	805.233	776.687	803.217
DDB_G0269718	746.378	0.612545	0.158742	3.85875	0.00011397	0.000374043	1020.94	862.856	941.9	606.913	581.013	660.166	616.031
DDB_G0269720	33.6361	-0.162649	0.514188	-0.316322	0.751758	0.801692	26.0445	36.8292	31.4368	38.9948	36.4802	29.8321	35.1023
DDB_G0269722	203.688	-2.38766	0.393951	-6.06079	1.35e-09	8.84e-09	83.3423	31.5679	57.4551	312.412	322.983	268.138	301.177
DDB_G0269724	285.096	0.627276	0.272674	2.30047	0.0214218	0.0416439	270.863	452.473	361.668	237.596	237.121	227.426	234.048
DDB_G0269726	133.273	-0.813802	0.284238	-2.86311	0.0041951	0.0098105	83.3423	99.965	91.6537	164.821	164.161	154.074	161.019
DDB_G0269728	66.6386	-1.24214	0.446058	-2.78471	0.00535755	0.012236	26.0445	47.3518	36.6982	93.6328	87.1965	78.9673	86.5989
DDB_G0269730	0.140386	2.04809	4.52016	0.453101	0.650476	NA	0	0	0	0	0	0.701931	0.233977
DDB_G0269732	215.1	-0.693501	0.323257	-2.14535	0.0319247	0.0585649	203.147	110.488	156.817	226.487	276.715	258.662	253.955
DDB_G0269734	6.93939	-3.58201	1.56466	-2.28932	0.0220606	0.0427351	0	0	0	11.3357	14.2362	9.12511	11.5657
DDB_G0269736	60.1177	-3.15336	0.862342	-3.65674	0.00025544	0.000779095	5.2089	15.7839	10.4964	107.916	111.665	60.0151	93.1986
DDB_G0269738	395.904	-1.38051	0.325969	-4.23509	2.28e-05	8.45e-05	145.849	257.804	201.827	530.284	592.135	453.448	525.289
DDB_G0269740	1149.58	5.99132	0.733028	8.17339	3e-16	3.64e-15	1963.75	3651.35	2807.55	30.3796	82.7477	19.6541	44.2605
DDB_G0269742	472.753	1.36544	0.32203	4.24009	2.23e-05	8.27e-05	531.307	962.821	747.064	301.983	294.955	272.7	289.88
DDB_G0269744	37.7801	0.0883285	0.459727	0.192133	0.847638	0.882913	52.089	26.3066	39.1978	38.0879	33.8109	38.6062	36.835
DDB_G0269746	29.8673	-2.03392	0.797826	-2.54933	0.0107931	0.0225932	5.2089	15.7839	10.4964	45.116	35.1455	48.0823	42.7813
DDB_G0269748	2.44515	0.195568	1.96248	0.0996535	0.920619	0.939515	0	5.26131	2.63066	1.81371	4.4488	0.701931	2.32148
DDB_G0269750	217.161	-0.289576	0.605832	-0.47798	0.632664	0.698195	78.1334	305.156	191.645	217.872	230.893	253.748	234.171
DDB_G0269752	1.25269	-1.13376	2.04337	-0.554849	0.578998	0.650151	0	0	0	3.17399	1.33464	1.75483	2.08782
DDB_G0269754	6.62439	-1.83574	1.54927	-1.18491	0.236055	0.308498	0	5.26131	2.63066	11.3357	8.45272	8.07221	9.28687
DDB_G0269756	878.373	-2.2837	0.182359	-12.5231	5.58e-36	2.23e-34	244.818	284.111	264.465	1276.63	1350.21	1236.1	1287.65
DDB_G0269758	6.19139	-1.71542	1.53259	-1.1193	0.263014	0.338165	5.2089	0	2.60445	8.61512	8.00784	9.12511	8.58269
DDB_G0269760	282.57	2.31221	0.748874	3.08759	0.00201787	0.00506326	921.975	163.101	542.538	105.649	111.22	110.905	109.258
DDB_G0269762	1411.89	-3.56424	0.277115	-12.862	7.37e-38	3.23e-36	244.818	131.533	188.175	2159	2356.53	2167.56	2227.7
DDB_G0269764	49.6149	-1.51066	0.543427	-2.77988	0.00543794	0.0124093	26.0445	21.0453	23.5449	74.5888	66.732	59.6642	66.995
DDB_G0269766	91.9085	7.03907	0.668183	10.5347	5.98e-26	1.44e-24	317.743	136.794	227.268	2.26714	1.33464	1.40386	1.66855
DDB_G0269768	2400.94	0.615891	0.402105	1.53167	0.125605	0.189947	4161.91	1904.6	3033.25	1881.95	2133.64	1922.59	1979.4
DDB_G0269770	69.1179	-0.123143	0.55144	-0.223312	0.823293	0.862601	31.2534	99.965	65.6092	66.2004	86.7516	61.419	71.457
DDB_G0269772	100.408	1.81733	0.892279	2.03673	0.041677	0.0740075	36.4623	315.679	176.071	46.2496	58.7242	44.9236	49.9658
DDB_G0269774	3.06086	-2.41671	1.74484	-1.38506	0.166034	0.23764	0	0	0	6.5747	3.11416	5.61545	5.10144
DDB_G0269776	68.9791	2.74528	0.64156	4.27907	1.88e-05	7.07e-05	223.983	57.8745	140.928	22.218	20.4645	20.356	21.0128
DDB_G0269778	158.616	0.0107461	0.471975	0.0227685	0.981835	0.986303	234.4	84.181	159.291	165.048	150.814	158.636	158.166
DDB_G0269780	110.072	-0.546335	0.303445	-1.80044	0.0717911	0.118242	88.5512	84.181	86.3661	134.441	117.893	125.295	125.876
DDB_G0269782	25.1869	-1.34265	0.706907	-1.89934	0.0575204	0.0977086	15.6267	10.5226	13.0747	32.4201	36.4802	30.885	33.2617
DDB_G0269784	42.2717	-1.01507	0.581715	-1.74496	0.0809913	0.130871	10.4178	42.0905	26.2542	55.9983	58.2793	44.5726	52.9501
DDB_G0269786	145.532	-1.82709	0.347688	-5.25499	1.48e-07	7.6e-07	72.9245	42.0905	57.5075	212.204	207.759	192.68	204.214
DDB_G0269788	155.759	-0.904087	0.529489	-1.70747	0.0877347	0.140208	46.8801	157.839	102.36	202.002	168.165	203.911	191.359
DDB_G0269790	1615.77	-0.449786	0.230263	-1.95336	0.0507767	0.0877935	1177.21	1473.17	1325.19	2087.35	1549.07	1792.03	1809.49
DDB_G0269794	1.13246	3.90051	3.55881	1.09601	0.273073	0.348944	5.2089	0	2.60445	0.453428	0	0	0.151143
DDB_G0269796	33.6277	3.33858	0.45084	7.40525	1.31e-13	1.27e-12	88.5512	57.8745	73.2128	7.48156	7.56296	6.66835	7.23762
DDB_G0269800	24.7049	-1.71051	0.815321	-2.09796	0.0359085	0.064881	20.8356	0	10.4178	36.7276	36.4802	29.4811	34.2296
DDB_G0269802	52.8091	0.321276	0.639739	0.502199	0.615528	0.682971	93.7601	26.3066	60.0333	60.3059	35.5904	48.0823	47.9929
DDB_G0269804	12.3134	4.48408	0.877218	5.11171	3.19e-07	1.57e-06	20.8356	36.8292	28.8324	0.906855	0.88976	2.10579	1.3008
DDB_G0269806	0.177952	1.74604	4.49921	0.388076	0.697959	NA	0	0	0	0	0.88976	0	0.296587
DDB_G0269808	0.777063	-0.420813	4.14868	-0.101433	0.919207	0.938863	0	0	0	0	1.77952	2.10579	1.2951
DDB_G0269812	78.141	0.165579	0.404331	0.409515	0.682162	0.742355	114.596	52.6131	83.6044	79.5765	64.9525	78.9673	74.4988
DDB_G0269814	307.145	-3.43641	0.440119	-7.80789	5.82e-15	6.29e-14	15.6267	73.6584	44.6425	491.516	508.498	446.428	482.147
DDB_G0269816	37.3586	-3.49279	1.05295	-3.31716	0.00090938	0.00246385	5.2089	5.26131	5.23511	64.8401	54.2754	57.2074	58.7743
DDB_G0269818	1.04178	5.43537	4.56169	1.19152	0.233448	0.305271	5.2089	0	2.60445	0	0	0	0
DDB_G0269820	2.09404	6.43756	2.87231	2.24125	0.02501	0.0472869	5.2089	5.26131	5.23511	0	0	0	0
DDB_G0269822	95.6389	-1.65264	0.459143	-3.5994	0.000318947	0.000950468	57.2979	26.3066	41.8022	147.364	137.023	110.203	131.53
DDB_G0269824	60.6995	-2.81743	0.682843	-4.12603	3.69e-05	0.000132225	5.2089	21.0453	13.1271	84.5642	94.7594	97.9194	92.4144
DDB_G0269826	13.8425	-0.620291	1.10474	-0.561482	0.574469	0.645919	10.4178	10.5226	10.4702	20.8577	21.7991	5.61545	16.0907
DDB_G0269828	130.524	-3.09885	0.511586	-6.05734	1.38e-09	9.02e-09	26.0445	21.0453	23.5449	207.216	212.653	185.661	201.843
DDB_G0269830	205.458	-5.00307	0.743935	-6.72515	1.75e-11	1.39e-10	10.4178	10.5226	10.4702	369.77	317.199	319.379	335.449
DDB_G0269832	16.4692	-1.50495	1.04842	-1.43545	0.151158	0.219566	5.2089	10.5226	7.86576	26.5255	12.0118	28.0773	22.2048
DDB_G0269834	196.917	1.22837	0.6149	1.99767	0.0457528	0.0802256	474.01	126.272	300.141	133.308	111.665	139.333	128.102
DDB_G0269836	0.231072	1.30918	4.47553	0.292519	0.76989	NA	0	0	0	0.453428	0	0.701931	0.38512
DDB_G0269838	20.8682	0.88473	0.54014	1.63796	0.101429	0.158918	26.0445	31.5679	28.8062	16.3234	16.0157	14.3896	15.5762
DDB_G0269840	241.511	-3.26045	0.393517	-8.28542	1.18e-16	1.49e-15	41.6712	36.8292	39.2502	376.345	390.16	362.548	376.351
DDB_G0269842	337.312	1.55149	0.302667	5.12606	2.96e-07	1.46e-06	458.383	657.664	558.024	200.415	152.149	217.95	190.171
DDB_G0269844	14.7317	9.2519	4.01903	2.30202	0.0213338	0.0415167	0	73.6584	36.8292	0	0	0	0
DDB_G0269846	0.272057	1.05354	4.46459	0.235978	0.81345	NA	0	0	0	1.36028	0	0	0.453428
DDB_G0269848	119.288	-0.187671	0.415046	-0.45217	0.651147	0.714875	62.5067	157.839	110.173	128.547	128.57	118.977	125.365
DDB_G0269850	1388.77	-4.11915	0.233734	-17.6232	1.63e-69	1.73e-67	109.387	147.317	128.352	2266.46	2288.91	2131.77	2229.04
DDB_G0269852	82.6465	11.7404	1.26126	9.30851	1.3e-20	2.2e-19	239.609	173.623	206.616	0	0	0	0
DDB_G0269854	331.572	0.886205	0.314618	2.81677	0.00485097	0.0112089	578.187	336.724	457.456	221.046	247.798	274.104	247.649
DDB_G0269856	74.3416	-3.13665	0.674926	-4.64741	3.36e-06	1.43e-05	0	26.3066	13.1533	117.211	118.338	109.852	115.134
DDB_G0269858	5.91338	-3.35516	1.6672	-2.01245	0.044172	0.0778494	0	0	0	7.70827	7.11808	14.7406	9.85564
DDB_G0269860	623.048	-5.44012	0.490018	-11.1019	1.23e-28	3.5e-27	15.6267	31.5679	23.5973	1029.51	1014.77	1023.77	1022.68
DDB_G0269864	126.316	-1.42341	0.348894	-4.07977	4.51e-05	0.000158974	36.4623	89.4423	62.9523	167.315	166.385	171.973	168.558
DDB_G0269866	0	NA	NA	NA	NA	NA	0	0	0	0	0	0	0
DDB_G0269870	0	NA	NA	NA	NA	NA	0	0	0	0	0	0	0
DDB_G0269872	0.569902	0.0198346	2.29356	0.00864796	0.9931	NA	0	0	0	0.906855	0.88976	1.0529	0.949837
DDB_G0269874	498.069	1.52413	0.260351	5.85413	4.8e-09	2.95e-08	1000.11	636.619	818.364	297.222	286.503	269.893	284.539
DDB_G0269876	27.6657	-0.621578	0.574378	-1.08218	0.279174	0.35526	26.0445	15.7839	20.9142	33.3269	31.5865	31.5869	32.1668
DDB_G0269878	2480.06	0.672065	0.499849	1.34454	0.178775	0.25325	4714.05	1673.1	3193.57	1892.15	2001.52	2119.48	2004.38
DDB_G0269880	15.9262	-0.453167	0.751665	-0.602885	0.546585	0.620828	10.4178	15.7839	13.1009	20.4042	15.1259	17.8992	17.8098
DDB_G0269882	0	NA	NA	NA	NA	NA	0	0	0	0	0	0	0
DDB_G0269884	161.494	-1.7851	0.387203	-4.61024	4.02e-06	1.7e-05	41.6712	89.4423	65.5568	257.547	209.983	208.825	225.452
DDB_G0269886	1.54855	1.7072	2.72807	0.62579	0.531453	0.60739	0	5.26131	2.63066	0	1.77952	0.701931	0.82715
DDB_G0269888	2.01875	-1.81146	1.90603	-0.950384	0.341917	0.421168	0	0	0	3.40071	1.77952	4.91352	3.36458
DDB_G0269890	62.1375	-0.074435	0.397041	-0.187474	0.851289	0.885379	36.4623	84.181	60.3217	66.8806	61.3934	61.77	63.348
DDB_G0269892	1794.04	2.64149	0.546035	4.83759	1.31e-06	5.92e-06	5490.18	1741.5	3615.84	532.324	578.344	627.878	579.515
DDB_G0269894	43.3406	1.04724	0.388775	2.69369	0.00706652	0.0155101	78.1334	47.3518	62.7426	29.4728	29.807	31.9379	30.4059
DDB_G0269896	66.9029	1.83359	0.382732	4.79078	1.66e-06	7.4e-06	151.058	84.181	117.62	29.2461	32.4762	37.5533	33.0919
DDB_G0269898	407.506	1.01166	0.16584	6.10024	1.06e-09	7e-09	552.143	615.574	583.858	275.684	312.306	281.825	289.938
DDB_G0269900	0	NA	NA	NA	NA	NA	0	0	0	0	0	0	0
DDB_G0269902	2.3522	3.57593	2.23727	1.59835	0.109966	0.17067	10.4178	0	5.2089	0.453428	0.88976	0	0.447729
DDB_G0269904	0	NA	NA	NA	NA	NA	0	0	0	0	0	0	0
DDB_G0269906	2.1358	-1.87497	1.75918	-1.06582	0.286505	0.362834	0	0	0	2.72057	4.4488	3.50966	3.55967
DDB_G0269908	446.248	-2.19832	0.351351	-6.25675	3.93e-10	2.69e-09	98.969	184.146	141.558	631.851	757.186	559.088	649.375
DDB_G0269910	354.143	0.891859	0.187049	4.76806	1.86e-06	8.24e-06	474.01	505.086	489.548	248.705	250.912	292.003	263.874
DDB_G0269912	787.845	-1.84208	0.169343	-10.8778	1.47e-27	3.94e-26	302.116	315.679	308.897	1151.03	1109.09	1061.32	1107.14
DDB_G0269914	12.8149	1.00589	0.758632	1.32592	0.184866	0.26074	26.0445	10.5226	18.2836	7.02813	8.8976	11.5819	9.1692
DDB_G0269916	17908.2	1.49265	0.154133	9.68415	3.52e-22	6.74e-21	29206.3	29200.3	29203.3	9038.63	11037.5	11058.6	10378.2
DDB_G0269918	135.886	-2.24634	0.386525	-5.81163	6.19e-09	3.75e-08	46.8801	36.8292	41.8546	204.042	196.192	195.488	198.574
DDB_G0269920	15.0874	0.902717	0.829533	1.08822	0.276497	0.352462	15.6267	26.3066	20.9666	10.4288	6.22832	16.8464	11.1678
DDB_G0269922	286.995	-1.76373	0.25414	-6.93999	3.92e-12	3.3e-11	135.431	99.965	117.698	412.392	408.845	378.341	399.859
DDB_G0269924	722.427	-1.27852	0.401212	-3.18664	0.00143937	0.00372079	541.725	236.759	389.242	910.483	990.303	932.867	944.551
DDB_G0269926	299.237	-1.58365	0.227992	-6.94606	3.76e-12	3.16e-11	125.013	147.317	136.165	412.846	411.959	399.048	407.951
DDB_G0269928	2.69492	2.38573	1.55626	1.53299	0.125279	0.189611	0	10.5226	5.26131	1.36028	0.88976	0.701931	0.983991
DDB_G0269930	6.27123	-3.43636	2.22155	-1.54683	0.121905	0.185343	0	0	0	7.70827	22.244	1.40386	10.452
DDB_G0269932	1350.28	0.488289	0.139432	3.50199	0.000461805	0.00133126	1578.3	1683.62	1630.96	1092.76	1263.46	1133.27	1163.16
DDB_G0269934	2573.07	0.169353	0.148673	1.13909	0.254665	0.329002	2786.76	2725.36	2756.06	2239.71	2398.79	2714.72	2451.07
DDB_G0269936	22.4866	-5.2797	1.4942	-3.53345	0.000410176	0.0011962	0	0	0	31.2865	36.925	44.2217	37.4777
DDB_G0269938	0	NA	NA	NA	NA	NA	0	0	0	0	0	0	0
DDB_G0269940	0.587746	-0.036198	4.43443	-0.00816295	0.993487	NA	0	0	0	2.49385	0.44488	0	0.979577
DDB_G0269942	6.73943	-3.54682	1.53085	-2.31689	0.0205099	0.0400972	0	0	0	11.7891	10.6771	11.2309	11.2324
DDB_G0269944	0	NA	NA	NA	NA	NA	0	0	0	0	0	0	0
DDB_G0269946	19.4634	-5.07863	1.48299	-3.42459	0.000615726	0.00173156	0	0	0	36.2742	29.807	31.2359	32.439
DDB_G0269948	1396.72	-0.543909	0.328422	-1.65613	0.0976963	0.153702	770.917	1420.55	1095.74	1555.48	1722.58	1514.07	1597.37
DDB_G0269950	225.1	-2.7817	0.375645	-7.40514	1.31e-13	1.27e-12	41.6712	57.8745	49.7728	360.475	357.684	307.797	341.985
DDB_G0269952	11.7569	-2.77642	1.50231	-1.8481	0.0645874	0.108229	5.2089	0	2.60445	19.4974	15.1259	18.9521	17.8585
DDB_G0269954	6.70775	4.46507	1.67509	2.66557	0.0076859	0.0167068	26.0445	5.26131	15.6529	0.453428	1.77952	0	0.744316
DDB_G0269956	1.04178	5.43537	4.56169	1.19152	0.233448	0.305271	5.2089	0	2.60445	0	0	0	0
DDB_G0269958	1.3706	2.36323	2.62682	0.899654	0.368304	0.4463	0	5.26131	2.63066	0	0.88976	0.701931	0.530564
DDB_G0269960	0	NA	NA	NA	NA	NA	0	0	0	0	0	0	0
DDB_G0269962	265.582	1.06316	0.499809	2.12713	0.0334094	0.0609038	567.77	205.191	386.48	200.642	190.409	163.901	184.984
DDB_G0269964	201.479	0.524242	0.546613	0.959073	0.337522	0.416684	125.013	368.292	246.653	206.31	137.913	169.867	171.363
DDB_G0269966	315.325	0.4164	0.34218	1.2169	0.223641	0.305271	489.636	252.543	371.09	283.619	290.062	260.768	278.149
DDB_G0269968	213.387	-2.46137	0.340644	-7.22565	4.99e-13	4.55e-12	41.6712	73.6584	57.6648	323.747	327.432	300.427	317.202
DDB_G0269970	11.8835	0.743027	0.761154	0.976186	0.328972	0.407771	10.4178	21.0453	15.7315	11.3357	8.8976	7.72125	9.31818
DDB_G0269972	442.315	-3.67267	0.344431	-10.663	1.52e-26	3.78e-25	78.1334	31.5679	54.8507	731.152	697.572	673.152	700.625
DDB_G0269974	18.0696	-3.4434	1.50008	-2.29548	0.0217058	0.042144	5.2089	0	2.60445	30.6064	22.244	32.2888	28.3797
DDB_G0269976	208.864	1.44927	0.408801	3.54517	0.000392361	0.00114999	463.592	210.453	337.022	123.559	113	133.718	123.425
DDB_G0269978	0.226714	1.31067	4.4756	0.292847	0.769639	NA	0	0	0	1.13357	0	0	0.377856
DDB_G0269980	123.951	-2.70033	0.463475	-5.82628	5.67e-09	3.46e-08	20.8356	36.8292	28.8324	177.29	193.523	191.276	187.363
DDB_G0269982	115.875	0.720002	0.307478	2.34164	0.0191994	0.0377958	171.894	131.533	151.713	93.8595	77.854	104.237	91.9834
DDB_G0269984	0	NA	NA	NA	NA	NA	0	0	0	0	0	0	0
DDB_G0269986	142.084	-4.12522	0.677866	-6.0856	1.16e-09	7.62e-09	15.6267	10.5226	13.0747	255.96	211.763	216.546	228.09
DDB_G0269988	1.82138	1.00701	2.87964	0.349699	0.726565	0.780343	0	5.26131	2.63066	3.40071	0.44488	0	1.28186
DDB_G0269990	12.3213	-0.964377	0.962473	-1.00198	0.316354	0.394255	0	15.7839	7.89197	16.7768	12.9015	16.1444	15.2743
DDB_G0269992	168.47	1.49708	0.198755	7.53226	4.99e-14	5e-13	270.863	278.85	274.856	93.4061	99.2082	100.025	97.5465
DDB_G0269994	168.647	1.36801	0.306379	4.46508	8e-06	3.22e-05	338.578	194.669	266.623	101.114	98.3185	110.554	103.329
DDB_G0269996	204.422	0.144237	0.469624	0.307133	0.758742	0.807151	307.325	126.272	216.798	233.288	193.078	162.146	196.171
DDB_G0269998	4.16712	7.43056	4.38797	1.69339	0.0903806	0.143398	20.8356	0	10.4178	0	0	0	0
DDB_G0270000	0.268638	1.11373	4.467	0.249324	0.80311	NA	0	0	0	0.453428	0.88976	0	0.447729
DDB_G0270002	6.47821	-3.49455	1.58248	-2.20828	0.0272248	0.0509162	0	0	0	13.8295	9.78736	8.77414	10.797
DDB_G0270004	0	NA	NA	NA	NA	NA	0	0	0	0	0	0	0
DDB_G0270006	408.573	1.69967	0.26537	6.4049	1.5e-10	1.08e-09	661.53	736.584	699.057	261.628	205.535	177.589	214.917
DDB_G0270008	2740.96	6.1161	0.269897	22.6608	1.09e-113	2.62e-111	5432.88	7981.41	6707.15	92.9527	111.22	86.3376	96.8367
DDB_G0270010	0	NA	NA	NA	NA	NA	0	0	0	0	0	0	0
DDB_G0270012	3507.47	7.66909	0.204763	37.4534	5.28e-307	1.46e-303	7896.69	9512.46	8704.57	40.8085	38.2597	49.1352	42.7345
DDB_G0270014	84.4972	1.281	0.362564	3.53317	0.000410602	0.00119679	161.476	99.965	130.72	62.573	52.4958	45.9765	53.6818
DDB_G0270016	2.67053	2.47407	1.70178	1.45381	0.145998	0.215791	10.4178	0	5.2089	0.453428	1.77952	0.701931	0.978293
DDB_G0270018	102.843	0.398659	0.341704	1.16668	0.243341	0.31667	156.267	84.181	120.224	95.8999	96.0941	81.775	91.2563
DDB_G0270020	32.495	-1.47891	0.688356	-2.14847	0.0316768	0.0581779	20.8356	10.5226	15.6791	50.1037	46.2675	34.7456	43.7056
DDB_G0270022	124.222	-0.674677	0.474001	-1.42337	0.15463	0.223785	114.596	68.3971	91.4964	181.144	156.598	100.376	146.039
DDB_G0270024	841.566	0.0447051	0.336934	0.132682	0.894445	0.919348	1114.7	599.79	857.247	916.15	792.776	784.408	831.112
DDB_G0270026	346.35	-4.14617	0.440221	-9.41838	4.58e-21	8.08e-20	5.2089	57.8745	31.5417	562.704	548.982	556.983	556.223
DDB_G0270028	626.294	0.667662	0.458388	1.45654	0.145243	0.214789	453.174	1157.49	805.332	491.516	518.285	511.006	506.936
DDB_G0270030	42.2139	1.00143	0.426125	2.3501	0.0187686	0.0369942	62.5067	57.8745	60.1906	27.8858	36.4802	26.3224	30.2295
DDB_G0270032	46.6916	1.91417	0.437229	4.37796	1.2e-05	4.66e-05	98.969	68.3971	83.6831	27.6591	19.1298	19.3031	22.0307
DDB_G0270034	619.229	1.3599	0.198925	6.83624	8.13e-12	6.63e-11	817.797	1136.44	977.12	376.572	376.813	388.519	380.635
DDB_G0270036	103.737	-1.68457	0.426854	-3.94648	7.93e-05	0.000267877	20.8356	68.3971	44.6163	136.482	139.247	153.723	143.151
DDB_G0270038	25.8881	-1.78612	0.813468	-2.19568	0.0281146	0.0523737	15.6267	5.26131	10.444	29.6995	36.0353	42.8178	36.1842
DDB_G0270040	62.901	-1.56566	1.09871	-1.42499	0.15416	0.223356	0	57.8745	28.9372	101.114	84.9721	70.5441	85.5435
DDB_G0270042	794.788	-0.439164	0.237464	-1.84939	0.0644008	0.107971	520.89	789.197	655.043	852.217	869.295	942.343	887.952
DDB_G0270044	180.623	-2.04344	0.359744	-5.68028	1.34e-08	7.82e-08	72.9245	52.6131	62.7688	240.997	294.066	242.517	259.193
DDB_G0270046	24.049	-0.045217	0.761589	-0.0593719	0.952656	0.964275	5.2089	42.0905	23.6497	28.5659	24.0235	20.356	24.3152
DDB_G0270048	11.3486	-0.198715	0.930361	-0.213589	0.830868	0.868443	5.2089	15.7839	10.4964	16.3234	8.8976	10.529	11.9167
DDB_G0270050	21.508	1.69869	0.608154	2.79319	0.00521904	0.0119469	31.2534	42.0905	36.6719	10.2021	15.5708	8.42318	11.3987
DDB_G0270052	24.0831	-1.2599	0.740299	-1.70188	0.0887776	0.141649	0	26.3066	13.1533	31.2865	31.5865	31.2359	31.3696
DDB_G0270054	17.3967	2.97703	1.12812	2.63894	0.00831669	0.0178982	67.7156	5.26131	36.4885	4.08085	7.11808	2.80773	4.66888
DDB_G0270056	183.167	2.76272	0.430717	6.41423	1.42e-10	1.01e-09	229.191	520.87	375.031	52.3709	53.3856	60.0151	55.2572
DDB_G0270058	53.5189	-2.97498	0.754165	-3.94474	7.99e-05	0.000269658	10.4178	10.5226	10.4702	88.1917	82.3028	76.1596	82.218
DDB_G0270060	3.41699	1.23872	1.69844	0.729332	0.465799	0.54321	0	10.5226	5.26131	4.08085	1.77952	0.701931	2.18743
DDB_G0270062	10.5797	-4.20231	1.59945	-2.62734	0.00860549	0.0184693	0	0	0	24.4851	11.5669	16.8464	17.6328
DDB_G0270064	0	NA	NA	NA	NA	NA	0	0	0	0	0	0	0
DDB_G0270066	36.7942	1.32187	0.412695	3.20302	0.00135995	0.00353037	67.7156	47.3518	57.5337	24.7118	23.1338	21.0579	22.9678
DDB_G0270068	270.188	1.98436	0.254852	7.78631	6.9e-15	7.43e-14	484.427	494.564	489.495	100.888	128.57	142.492	123.983
DDB_G0270070	694.569	-0.997711	0.194678	-5.12492	2.98e-07	1.47e-06	369.832	499.825	434.828	904.135	811.461	887.592	867.729
DDB_G0270072	12.0196	-0.923443	0.931294	-0.99157	0.321407	0.399335	10.4178	5.26131	7.83955	16.7768	12.9015	14.7406	14.8063
DDB_G0270074	758.054	0.582299	0.21175	2.74993	0.00596076	0.0133567	1104.29	789.197	946.742	658.83	589.021	648.936	632.262
DDB_G0270076	3.08839	1.69262	2.47043	0.685153	0.493247	0.570639	0	10.5226	5.26131	1.36028	3.55904	0	1.63977
DDB_G0270078	1.76691	1.15803	2.17349	0.532798	0.594173	0.663344	0	5.26131	2.63066	0.226714	0.88976	2.45676	1.19108
DDB_G0270080	1.05226	5.44259	4.56113	1.19325	0.23277	0.305271	0	5.26131	2.63066	0	0	0	0
DDB_G0270084	0.177952	1.74604	4.49921	0.388076	0.697959	NA	0	0	0	0	0.88976	0	0.296587
DDB_G0270086	47.6123	5.42684	0.626309	8.66481	4.52e-18	6.4e-17	125.013	105.226	115.12	2.72057	0.88976	4.21159	2.6073
DDB_G0270088	116.741	4.16586	0.463944	8.97922	2.73e-19	4.22e-18	322.952	215.714	269.333	17.2302	18.685	9.12511	15.0134
DDB_G0270090	0.0906855	2.4812	4.544	0.546038	0.58504	NA	0	0	0	0.453428	0	0	0.151143
DDB_G0270092	0.231072	1.30918	4.47553	0.292519	0.76989	NA	0	0	0	0.453428	0	0.701931	0.38512
DDB_G0270094	2.64345	2.55732	1.4818	1.72582	0.0843795	0.135671	5.2089	5.26131	5.23511	0.453428	0.88976	1.40386	0.915683
DDB_G0270096	248.897	-0.768167	0.451463	-1.70151	0.0888481	0.141741	250.027	99.965	174.996	327.148	316.755	250.589	298.164
DDB_G0270098	1681.93	0.251658	0.274756	0.915932	0.359702	0.437172	1411.61	2309.72	1860.66	1500.17	1610.91	1577.24	1562.77
DDB_G0270100	27.2898	3.5178	0.775999	4.53325	5.81e-06	2.39e-05	41.6712	78.9197	60.2954	3.17399	3.55904	9.12511	5.28605
DDB_G0270102	974.928	0.858875	0.187597	4.57831	4.69e-06	1.96e-05	1479.33	1189.06	1334.19	775.361	658.422	772.475	735.42
DDB_G0270104	137.717	0.247146	0.295637	0.835979	0.403167	0.481723	130.222	173.623	151.923	114.037	146.81	123.891	128.246
DDB_G0270106	1678.27	0.291819	0.160498	1.81821	0.0690317	0.11429	1744.98	2025.61	1885.29	1496.54	1690.54	1433.69	1540.26
DDB_G0270108	5.68423	4.13608	1.09091	3.79139	0.000149804	0.000482503	15.6267	10.5226	13.0747	0.680141	0.88976	0.701931	0.757278
DDB_G0270110	78.8643	-4.00976	0.882547	-4.5434	5.54e-06	2.28e-05	15.6267	0	7.81334	148.498	111.22	118.977	126.232
DDB_G0270112	286.468	1.61494	0.449547	3.59238	0.000327674	0.000974372	677.156	284.111	480.634	138.976	176.617	155.478	157.024
DDB_G0270114	10.4858	1.1841	1.16077	1.0201	0.307679	0.385089	0	31.5679	15.7839	6.34799	8.8976	5.61545	6.95368
DDB_G0270116	151.206	-1.05918	0.323819	-3.27092	0.001072	0.00286022	109.387	73.6584	91.5226	188.172	213.542	171.271	190.995
DDB_G0270118	208.139	1.92664	0.67362	2.86013	0.00423468	0.00988838	609.441	136.794	373.117	104.515	100.098	89.8472	98.1534
DDB_G0270120	1079.34	-0.312493	0.114088	-2.73904	0.00616186	0.0137626	927.183	957.559	942.371	1133.8	1188.72	1189.42	1170.65
DDB_G0270122	26.1913	10.0821	1.35489	7.44125	9.97e-14	9.73e-13	57.2979	73.6584	65.4781	0	0	0	0
DDB_G0270124	135.726	4.63405	0.550552	8.41709	3.86e-17	5.11e-16	187.52	452.473	319.997	14.7364	15.1259	8.77414	12.8788
DDB_G0270126	45.3143	8.98595	1.58497	5.66948	1.43e-08	8.29e-08	36.4623	189.407	112.935	0	0	0.701931	0.233977
DDB_G0270128	83.0758	-1.18692	0.44692	-2.65577	0.00791272	0.0171458	46.8801	47.3518	47.1159	118.345	84.5272	118.275	107.049
DDB_G0270130	211.008	1.85028	0.533281	3.46962	0.000521188	0.00148956	187.52	557.699	372.61	111.316	90.7555	107.746	103.273
DDB_G0270132	75.2231	-0.785068	0.383698	-2.04606	0.0407506	0.0725609	46.8801	57.8745	52.3773	82.7505	98.7634	89.8472	90.4537
DDB_G0270134	40.3554	-1.34946	0.569748	-2.36853	0.0178592	0.0353692	10.4178	31.5679	20.9928	57.1319	50.7163	51.9429	53.2637
DDB_G0270136	0	NA	NA	NA	NA	NA	0	0	0	0	0	0	0
DDB_G0270138	26.0759	10.0763	1.95373	5.15744	2.5e-07	1.25e-06	114.596	15.7839	65.1898	0	0	0	0
DDB_G0270140	53.1965	6.90782	0.96571	7.1531	8.48e-13	7.56e-12	46.8801	215.714	131.297	0.906855	1.77952	0.701931	1.12944
DDB_G0270144	0	NA	NA	NA	NA	NA	0	0	0	0	0	0	0
DDB_G0270146	177.206	2.33981	0.760796	3.07547	0.00210171	0.00524856	578.187	105.226	341.707	54.4113	70.291	77.9144	67.5389
DDB_G0270148	77.7442	-0.574365	0.434989	-1.32041	0.186697	0.262952	88.5512	31.5679	60.0596	88.1917	83.1926	97.2175	89.5339
DDB_G0270150	35.7129	-1.64077	0.712808	-2.30184	0.0213444	0.0415301	0	31.5679	15.7839	52.5976	49.8266	44.5726	48.9989
DDB_G0270152	450.924	-1.70637	0.255002	-6.69162	2.21e-11	1.74e-10	140.64	242.02	191.33	621.649	650.859	599.449	623.986
DDB_G0270154	0.768347	-0.40586	2.24351	-0.180904	0.856443	0.889231	0	0	0	1.36028	1.77952	0.701931	1.28058
DDB_G0270156	552.841	-6.86631	0.851126	-8.06733	7.19e-16	8.45e-15	10.4178	5.26131	7.83955	944.716	981.85	821.962	916.176
DDB_G0270158	9.36241	-0.396587	1.08625	-0.365097	0.715039	0.770837	10.4178	5.26131	7.83955	6.34799	9.34248	15.4425	10.3777
DDB_G0270160	12.5538	9.02167	1.54777	5.82881	5.58e-09	3.41e-08	36.4623	26.3066	31.3844	0	0	0	0
DDB_G0270162	0	NA	NA	NA	NA	NA	0	0	0	0	0	0	0
DDB_G0270164	59.3339	3.47191	0.458084	7.5792	3.48e-14	3.53e-13	125.013	136.794	130.904	14.0563	7.11808	13.6877	11.6207
DDB_G0270166	37.8602	8.74822	1.17504	7.44504	9.69e-14	9.47e-13	98.969	89.4423	94.2057	0	0.88976	0	0.296587
DDB_G0270168	61.1065	-0.144231	0.384927	-0.374697	0.707886	0.764694	67.7156	47.3518	57.5337	69.8278	62.7281	57.9093	63.4884
DDB_G0270170	1354.36	1.06997	0.189926	5.63359	1.76e-08	1.01e-07	1771.02	2178.18	1974.6	832.04	1010.32	980.247	940.87
DDB_G0270172	1.18857	-1.05806	2.14008	-0.494404	0.621021	0.687545	0	0	0	2.94728	0.88976	2.10579	1.98094
DDB_G0270174	106.911	-1.95095	0.410513	-4.75246	2.01e-06	8.85e-06	31.2534	47.3518	39.3026	148.271	162.381	145.3	151.984
DDB_G0270176	332.406	1.60312	0.45794	3.50071	0.000464019	0.00133695	791.752	320.94	556.346	191.12	162.381	195.839	183.113
DDB_G0270178	27.9242	-4.09826	1.46404	-2.79928	0.00512167	0.0117679	0	5.26131	2.63066	46.703	44.488	43.1688	44.7866
DDB_G0270180	26.4776	-5.52188	1.47233	-3.75044	0.000176524	0.000555436	0	0	0	48.29	40.929	43.1688	44.1293
DDB_G0270182	137.451	-6.44155	1.45089	-4.43971	9.01e-06	3.58e-05	5.2089	0	2.60445	241.677	227.334	213.036	227.349
DDB_G0270184	148.422	-1.56386	0.758125	-2.0628	0.0391317	0.0700524	15.6267	121.01	68.3185	193.614	208.649	203.209	201.824
DDB_G0270186	0.0906855	2.4812	4.544	0.546038	0.58504	NA	0	0	0	0.453428	0	0	0.151143
DDB_G0270188	220.589	-0.881366	0.232093	-3.79747	0.000146179	0.000471515	161.476	131.533	146.504	275.004	276.27	258.662	269.979
DDB_G0270190	30.7126	1.23887	0.616785	2.0086	0.0445797	0.0784926	72.9245	21.0453	46.9849	23.8049	18.2401	17.5483	19.8644
DDB_G0270192	29.1963	-1.99679	0.77009	-2.59293	0.00951619	0.0201961	10.4178	10.5226	10.4702	45.3428	40.0392	39.6591	41.6804
DDB_G0270194	7.12843	0.25022	1.06184	0.235647	0.813707	0.85457	5.2089	10.5226	7.86576	6.80141	8.8976	4.21159	6.63687
DDB_G0270196	200.42	-2.9694	0.402127	-7.38424	1.53e-13	1.48e-12	26.0445	52.6131	39.3288	290.42	320.314	312.71	307.815
DDB_G0270198	1.21973	3.20481	3.88098	0.825773	0.408933	0.487105	5.2089	0	2.60445	0	0.88976	0	0.296587
DDB_G0270200	92.774	-0.674356	1.06943	-0.630577	0.528317	0.604327	5.2089	131.533	68.3709	123.332	99.2082	104.588	109.043
DDB_G0270202	140.39	-4.10734	0.695525	-5.90539	3.52e-09	2.2e-08	15.6267	10.5226	13.0747	262.761	192.633	220.406	225.267
DDB_G0270204	116.52	-2.60653	0.518964	-5.02255	5.1e-07	2.42e-06	41.6712	15.7839	28.7276	198.828	145.921	180.396	175.048
DDB_G0270206	84.1924	-0.0855697	0.36325	-0.235567	0.813769	0.85457	57.2979	105.226	81.2621	81.8437	80.0784	96.5156	86.1459
DDB_G0270208	3.62906	-2.65972	1.65139	-1.61059	0.107268	0.167164	0	0	0	7.02813	4.4488	6.66835	6.04843
DDB_G0270210	11.7508	1.31203	1.17294	1.11858	0.263318	0.338438	15.6267	21.0453	18.336	11.3357	9.34248	1.40386	7.36068
DDB_G0270212	58.0424	7.69129	0.848581	9.0637	1.26e-19	1.98e-18	98.969	189.407	144.188	1.13357	0	0.701931	0.611833
DDB_G0270214	46.0514	3.93782	0.542322	7.26104	3.84e-13	3.55e-12	78.1334	131.533	104.833	7.48156	8.8976	4.21159	6.86358
DDB_G0270216	0.920868	-0.670221	2.30243	-0.291093	0.77098	0.817805	0	0	0	0.906855	0.88976	2.80773	1.53478
DDB_G0270218	1.95923	0.787729	2.7395	0.287545	0.773695	0.820291	5.2089	0	2.60445	0	1.77952	2.80773	1.52908
DDB_G0270220	894.481	1.86239	0.430566	4.32545	1.52e-05	5.83e-05	2208.57	957.559	1583.07	399.47	423.526	483.28	435.425
DDB_G0270222	0.355904	0.723371	4.45299	0.162446	0.870955	NA	0	0	0	0	1.77952	0	0.593173
DDB_G0270224	20.1862	6.29988	1.4814	4.25264	2.11e-05	7.86e-05	88.5512	10.5226	49.5369	0.453428	0	1.40386	0.619097
DDB_G0270226	2.08356	6.43089	4.44712	1.44608	0.148155	0.215857	10.4178	0	5.2089	0	0	0	0
DDB_G0270228	22.5697	-3.78268	1.49591	-2.52869	0.011449	0.0238308	5.2089	0	2.60445	44.2092	31.1416	32.2888	35.8799
DDB_G0270230	76.8941	-3.19269	0.688055	-4.64016	3.48e-06	1.48e-05	10.4178	15.7839	13.1009	133.761	105.881	118.626	119.423
DDB_G0270232	26.9198	-2.33879	0.904873	-2.58466	0.00974762	0.0206475	10.4178	5.26131	7.83955	45.7962	40.4841	32.6398	39.64
DDB_G0270234	0	NA	NA	NA	NA	NA	0	0	0	0	0	0	0
DDB_G0270236	0	NA	NA	NA	NA	NA	0	0	0	0	0	0	0
DDB_G0270238	570.474	0.527904	0.160081	3.29774	0.000974668	0.0026208	687.574	710.277	698.926	459.095	467.569	527.852	484.839
DDB_G0270240	0	NA	NA	NA	NA	NA	0	0	0	0	0	0	0
DDB_G0270242	22.842	-2.72054	1.10087	-2.47127	0.0134633	0.027515	5.2089	5.26131	5.23511	34.0071	42.7085	27.0244	34.58
DDB_G0270244	0	NA	NA	NA	NA	NA	0	0	0	0	0	0	0
DDB_G0270246	30.9253	-3.20182	1.09123	-2.93415	0.00334462	0.00798744	0	10.5226	5.26131	56.4517	37.8148	49.8371	48.0346
DDB_G0270248	37.7007	-0.791576	0.533795	-1.48292	0.138096	0.205653	10.4178	42.0905	26.2542	45.3428	45.3778	45.2746	45.3317
DDB_G0270250	18.7317	0.931942	0.906015	1.02862	0.30366	0.381016	5.2089	47.3518	26.2804	18.1371	10.6771	12.2838	13.6993
DDB_G0270252	28.5559	2.02394	0.627639	3.22468	0.00126113	0.00329943	62.5067	42.0905	52.2986	16.3234	7.11808	14.7406	12.7273
DDB_G0270254	15.0202	0.902473	0.895832	1.00741	0.313736	0.391169	36.4623	5.26131	20.8618	12.9227	7.11808	13.3367	11.1258
DDB_G0270256	32.5296	1.04623	0.466932	2.24065	0.025049	0.0473363	41.6712	52.6131	47.1422	21.7645	19.5747	27.0244	22.7879
DDB_G0270258	0	NA	NA	NA	NA	NA	0	0	0	0	0	0	0
DDB_G0270260	1743.38	-2.67872	0.157841	-16.971	1.35e-64	1.31e-62	416.712	405.121	410.916	2518.79	2777.39	2598.9	2631.69
DDB_G0270262	15.3964	-2.08554	1.12421	-1.85512	0.0635787	0.106702	0	10.5226	5.26131	27.2057	21.3542	17.8992	22.153
DDB_G0270264	1206.98	0.900739	0.123797	7.27596	3.44e-13	3.21e-12	1531.42	1815.15	1673.28	895.293	895.988	897.068	896.116
DDB_G0270266	125.55	1.17696	0.297512	3.95602	7.62e-05	0.000257951	140.64	236.759	188.7	79.3498	81.8579	89.1453	83.451
DDB_G0270268	9.96842	-2.50642	1.49802	-1.67315	0.0942969	0.149183	5.2089	0	2.60445	14.5097	14.681	15.4425	14.8777
DDB_G0270270	416.743	-0.781903	0.431095	-1.81376	0.069715	0.1153	166.685	415.644	291.164	498.544	502.714	500.126	500.461
DDB_G0270272	2619.99	0.63943	0.321036	1.99177	0.0463963	0.0812506	2390.88	4282.71	3336.8	2004.15	2297.81	2124.4	2142.12
DDB_G0270274	0	NA	NA	NA	NA	NA	0	0	0	0	0	0	0
DDB_G0270276	79.673	3.17502	0.895382	3.546	0.000391133	0.001147	36.4623	305.156	170.809	17.0035	18.685	21.0579	18.9155
DDB_G0270278	57.3259	-0.823037	0.433607	-1.89812	0.0576807	0.0979508	41.6712	36.8292	39.2502	69.1477	63.173	75.8086	69.3764
DDB_G0270280	0	NA	NA	NA	NA	NA	0	0	0	0	0	0	0
DDB_G0270282	21.96	-5.25087	1.48119	-3.54502	0.000392576	0.00115032	0	0	0	37.4078	32.0314	40.3611	36.6001
DDB_G0270284	4.97198	2.95943	1.48995	1.98626	0.0470049	0.0821297	10.4178	10.5226	10.4702	1.81371	0	2.10579	1.3065
DDB_G0270286	0.181371	1.62411	4.49189	0.361565	0.717677	NA	0	0	0	0.906855	0	0	0.302285
DDB_G0270288	0	NA	NA	NA	NA	NA	0	0	0	0	0	0	0
DDB_G0270290	0	NA	NA	NA	NA	NA	0	0	0	0	0	0	0
DDB_G0270292	0	NA	NA	NA	NA	NA	0	0	0	0	0	0	0
DDB_G0270294	0.0453428	3.04447	4.56063	0.667554	0.504418	NA	0	0	0	0.226714	0	0	0.0755713
DDB_G0270296	489.712	1.76703	0.314102	5.62566	1.85e-08	1.05e-07	989.69	710.277	849.984	277.951	189.519	281.124	249.531
DDB_G0270298	1272.6	-0.290213	0.430767	-0.673713	0.500494	0.577569	666.739	1578.39	1122.57	1323.56	1479.23	1315.07	1372.62
DDB_G0270300	20.0637	-1.84392	0.89485	-2.06059	0.0393424	0.0703942	5.2089	10.5226	7.86576	26.7522	26.2479	31.5869	28.1957
DDB_G0270302	3.24146	-2.49178	1.64664	-1.51325	0.130216	0.195607	0	0	0	5.44113	4.4488	6.31738	5.40244
DDB_G0270304	18.5315	-1.19003	0.854844	-1.3921	0.163892	0.235062	5.2089	15.7839	10.4964	26.9789	27.1377	17.5483	23.8883
DDB_G0270306	4.77164	-1.25615	1.70132	-0.738337	0.46031	0.538003	0	5.26131	2.63066	9.74869	5.33856	3.50966	6.19897
DDB_G0270308	38.1186	-1.0191	0.585403	-1.74085	0.0817091	0.131896	26.0445	21.0453	23.5449	47.1565	57.3895	38.9572	47.8344
DDB_G0270310	205.081	1.03607	0.365318	2.83608	0.00456709	0.0105907	208.356	384.076	296.216	164.821	146.366	121.785	144.324
DDB_G0270312	44.7533	2.73796	0.69917	3.91601	9e-05	0.000301216	130.222	52.6131	91.4178	14.5097	7.11808	19.3031	13.6436
DDB_G0270314	65.2688	9.00613	1.16742	7.71453	1.21e-14	1.28e-13	78.1334	247.282	162.708	0.226714	0	0.701931	0.309548
DDB_G0270316	23246.8	0.90197	0.252679	3.56962	0.000357497	0.00105622	26773.7	37702.6	32238.2	14584.3	18530.6	18642.9	17252.6
DDB_G0270318	6.02425	3.28006	1.41802	2.31313	0.0207156	0.0404633	10.4178	15.7839	13.1009	1.81371	0	2.10579	1.3065
DDB_G0270320	223.088	0.352405	0.270163	1.30441	0.192093	0.269589	312.534	199.93	256.232	182.505	216.212	204.262	200.993
DDB_G0270322	121.034	-0.62114	0.323102	-1.92243	0.0545517	0.0933553	109.387	73.6584	91.5226	154.846	140.582	126.699	140.709
DDB_G0270324	184.232	0.775053	0.525388	1.4752	0.140159	0.208416	369.832	121.01	245.421	148.724	135.244	146.353	143.44
DDB_G0270326	11.1413	-0.76723	1.03251	-0.74307	0.457439	0.535328	0	15.7839	7.89197	16.0967	9.78736	14.0386	13.3076
DDB_G0270328	169.838	12.7792	1.28152	9.97191	2.02e-23	4.12e-22	312.534	536.654	424.594	0	0	0	0
DDB_G0270330	37.7452	10.6092	1.36944	7.74706	9.4e-15	9.99e-14	67.7156	121.01	94.3629	0	0	0	0
DDB_G0270336	532.257	-2.42875	0.227306	-10.6849	1.2e-26	3.01e-25	135.431	157.839	146.635	801.433	819.024	747.557	789.338
DDB_G0270338	20.5526	-0.274483	0.822595	-0.33368	0.738621	0.790546	26.0445	10.5226	18.2836	24.2584	12.4566	29.4811	22.0654
DDB_G0270340	288.209	0.0970056	0.831383	0.11668	0.907114	0.929945	520.89	78.9197	299.905	370.904	274.491	195.839	280.411
DDB_G0270342	3.74012	2.91562	1.75238	1.6638	0.096152	0.151726	5.2089	10.5226	7.86576	2.26714	0	0.701931	0.98969
DDB_G0270344	81.6231	1.02119	0.812872	1.25627	0.209019	0.289254	203.147	31.5679	117.357	71.8683	45.3778	56.1545	57.8002
DDB_G0270346	40.6656	-0.0828594	0.456019	-0.181702	0.855817	0.889083	52.089	26.3066	39.1978	38.5413	41.8187	44.5726	41.6442
DDB_G0270348	3.71402	3.01647	1.45789	2.06906	0.0385403	0.0690934	15.6267	0	7.81334	0.906855	1.33464	0.701931	0.981142
DDB_G0270350	56.4734	6.56436	0.714965	9.18136	4.26e-20	6.92e-19	83.3423	194.669	139.005	1.36028	0.88976	2.10579	1.45195
DDB_G0270352	511.455	1.14645	0.191448	5.9883	2.12e-09	1.36e-08	671.948	852.333	762.14	347.779	369.695	315.518	344.331
DDB_G0270354	10.6812	-4.20703	1.78248	-2.36021	0.0182645	0.0360974	0	0	0	19.9508	27.1377	6.31738	17.802
DDB_G0270356	369.654	-1.61768	0.235939	-6.85634	7.06e-12	5.8e-11	145.849	184.146	164.998	492.876	478.246	547.155	506.092
DDB_G0270358	326.13	-0.900928	0.197346	-4.56522	4.99e-06	2.07e-05	213.565	215.714	214.639	418.74	390.605	392.029	400.458
DDB_G0270360	45.6423	-1.80587	0.64166	-2.81438	0.00488718	0.0112879	26.0445	10.5226	18.2836	70.7347	50.7163	70.1931	63.8814
DDB_G0270362	259.275	1.16226	0.413869	2.80828	0.00498069	0.0114702	265.654	510.348	388.001	157.339	218.436	144.598	173.458
DDB_G0270364	0	NA	NA	NA	NA	NA	0	0	0	0	0	0	0
DDB_G0270366	92.3056	11.8994	1.35973	8.75132	2.11e-18	3.05e-17	145.849	315.679	230.764	0	0	0	0
DDB_G0270368	79.7623	11.6887	1.45019	8.06015	7.62e-16	8.95e-15	104.178	294.634	199.406	0	0	0	0
DDB_G0270372	0	NA	NA	NA	NA	NA	0	0	0	0	0	0	0
DDB_G0270374	1.11197	4.45699	3.49316	1.27592	0.201984	0.28136	5.2089	0	2.60445	0	0	0.350966	0.116989
DDB_G0270376	24.0796	8.99981	1.43109	6.28877	3.2e-10	2.22e-09	83.3423	36.8292	60.0858	0.226714	0	0	0.0755713
DDB_G0270378	502.215	0.587695	0.15703	3.74256	0.000182154	0.000571523	557.352	699.755	628.553	424.408	408.4	421.159	417.989
DDB_G0270380	5502.96	1.6952	0.855069	1.98254	0.0474193	0.0827402	2052.3	16752	9402.17	2562.77	3036.75	3110.96	2903.49
DDB_G0270382	504.481	-1.27365	0.352043	-3.61787	0.000297033	0.000893366	177.102	368.292	272.697	682.635	665.096	629.281	659.004
DDB_G0270384	54.8413	-3.01297	0.762897	-3.94938	7.84e-05	0.000264886	0	21.0453	10.5226	90.9122	76.9642	85.2847	84.387
DDB_G0270386	59.0139	-0.0583901	0.450977	-0.129475	0.896982	0.921527	41.6712	73.6584	57.6648	69.3744	62.2832	48.0823	59.9133
DDB_G0270388	6195.21	-1.78053	0.386421	-4.60774	4.07e-06	1.72e-05	1656.43	3377.76	2517.1	7441.65	9516.87	8983.32	8647.28
DDB_G0270390	319.884	0.775648	0.218176	3.55515	0.000377761	0.00111222	505.263	347.247	426.255	255.733	240.235	250.94	248.97
DDB_G0270392	94.8183	-1.52786	0.39162	-3.90139	9.56e-05	0.000318074	31.2534	57.8745	44.5639	131.494	131.684	121.785	128.321
DDB_G0270394	49.0018	-6.40952	1.46606	-4.37195	1.23e-05	4.78e-05	0	0	0	91.1389	73.8501	80.0202	81.6697
DDB_G0270396	58.1986	-5.18684	1.46927	-3.53021	0.000415225	0.00120898	5.2089	0	2.60445	106.555	99.2082	80.0202	95.2613
DDB_G0270398	1374.09	0.631954	0.366429	1.72463	0.0845943	0.135997	2338.79	1152.23	1745.51	1099.79	1125.99	1153.62	1126.47
DDB_G0270400	79.7271	-0.626181	0.414458	-1.51084	0.130828	0.19642	88.5512	31.5679	60.0596	95.2198	95.2043	88.0924	92.8388
DDB_G0270402	162.027	-0.608015	0.437426	-1.38999	0.164533	0.2358	67.7156	178.885	123.3	176.157	202.42	184.959	187.845
DDB_G0270404	703.054	-0.964933	0.167431	-5.76317	8.25e-09	4.91e-08	442.756	452.473	447.615	895.066	807.902	917.073	873.347
DDB_G0270406	4.07451	0.681537	1.38805	0.491005	0.623423	0.68979	0	10.5226	5.26131	2.26714	2.66928	4.91352	3.28331
DDB_G0270408	83.0417	4.06921	0.54055	7.5279	5.16e-14	5.16e-13	276.071	105.226	190.649	13.1494	10.2322	10.529	11.3035
DDB_G0270410	1256.31	-1.27519	0.191103	-6.67277	2.51e-11	1.96e-10	604.232	752.368	678.3	1489.06	1652.28	1783.61	1641.65
DDB_G0270412	393.774	-3.42392	0.343286	-9.97396	1.98e-23	4.04e-22	72.9245	42.0905	57.5075	634.572	646.856	572.425	617.951
DDB_G0270414	8.9487	1.10245	0.923921	1.19322	0.232782	0.305271	10.4178	15.7839	13.1009	4.9877	9.34248	4.21159	6.18059
DDB_G0270416	54.9483	-0.604178	0.448265	-1.34782	0.177718	0.252075	26.0445	57.8745	41.9595	64.3867	56.9446	69.4912	63.6075
DDB_G0270418	488.973	-0.287812	0.21966	-1.31026	0.190108	0.267075	500.054	363.031	431.542	487.661	574.34	519.78	527.261
DDB_G0270420	754.956	-1.69727	0.185955	-9.12732	7.02e-20	1.13e-18	369.832	273.588	321.71	1017.26	1021.89	1092.21	1043.79
DDB_G0270422	8.378	-3.86433	1.52808	-2.52887	0.011443	0.0238272	0	0	0	16.0967	12.4566	13.3367	13.9633
DDB_G0270424	16016.1	3.47859	0.334284	10.4061	2.33e-25	5.4e-24	45317.4	25264.8	35291.1	2791.75	3211.14	3495.27	3166.05
DDB_G0270426	0.321757	0.829564	4.45644	0.186149	0.852328	NA	0	0	0	0.906855	0	0.701931	0.536262
DDB_G0270428	27.222	-2.35142	0.871905	-2.69688	0.00699919	0.0153776	5.2089	10.5226	7.86576	38.9948	41.3738	40.0101	40.1262
DDB_G0270430	2424.99	4.71507	0.912191	5.16895	2.35e-07	1.18e-06	10433.4	1036.48	5734.95	214.018	218.881	222.161	218.353
DDB_G0270432	112.047	0.826326	0.307661	2.68584	0.00723485	0.0158261	125.013	178.885	151.949	97.7136	81.413	77.2125	85.4464
DDB_G0270434	165.759	-0.362791	0.245006	-1.48074	0.138675	0.206377	125.013	157.839	141.426	172.756	185.07	188.118	181.981
DDB_G0270436	1601.98	-5.72738	0.458612	-12.4885	8.62e-36	3.38e-34	31.2534	68.3971	49.8252	2060.6	2675.51	3174.13	2636.75
DDB_G0270438	196.622	2.12551	0.373564	5.68981	1.27e-08	7.42e-08	489.636	242.02	365.828	88.8718	81.8579	80.7221	83.8173
DDB_G0270440	10.0794	-4.12942	1.51552	-2.72476	0.00643487	0.0143	0	0	0	17.9104	14.2362	18.2502	16.7989
DDB_G0270442	10.6973	-1.4584	1.14981	-1.26838	0.204662	0.284409	10.4178	0	5.2089	13.6028	11.5669	17.8992	14.3563
DDB_G0270444	426.099	-1.7593	0.306315	-5.74342	9.28e-09	5.5e-08	197.938	152.578	175.258	685.809	609.486	484.684	593.326
DDB_G0270446	104.401	-1.15004	0.364999	-3.15079	0.0016283	0.00416142	36.4623	84.181	60.3217	126.733	138.803	135.824	133.786
DDB_G0270448	2.81688	-2.28159	1.65936	-1.37498	0.169136	0.24133	0	0	0	4.53428	5.33856	4.21159	4.69481
DDB_G0270450	144.132	0.892043	0.275852	3.23377	0.00122166	0.00320683	171.894	226.237	199.065	97.2602	122.787	102.482	107.51
DDB_G0270452	3.48467	-2.59623	1.7467	-1.48636	0.137183	0.204567	0	0	0	5.44113	3.55904	8.42318	5.80778
DDB_G0270454	0.0453428	3.04447	4.56063	0.667554	0.504418	NA	0	0	0	0.226714	0	0	0.0755713
DDB_G0270456	5.26131	7.76631	4.37559	1.77492	0.0759113	0.123931	0	26.3066	13.1533	0	0	0	0
DDB_G0270458	13.5641	9.13349	2.022	4.51705	6.27e-06	2.56e-05	57.2979	10.5226	33.9102	0	0	0	0
DDB_G0270460	0	NA	NA	NA	NA	NA	0	0	0	0	0	0	0
DDB_G0270462	1.04178	5.43537	4.56169	1.19152	0.233448	0.305271	5.2089	0	2.60445	0	0	0	0
DDB_G0270464	28.2014	10.1894	1.56025	6.53061	6.55e-11	4.87e-10	104.178	36.8292	70.5036	0	0	0	0
DDB_G0270466	11.1329	-1.52027	1.10146	-1.38024	0.167514	0.239386	0	10.5226	5.26131	14.7364	16.0157	14.3896	15.0472
DDB_G0270468	0	NA	NA	NA	NA	NA	0	0	0	0	0	0	0
DDB_G0270470	108.801	-2.99782	0.546931	-5.48117	4.23e-08	2.31e-07	0	42.0905	21.0453	170.035	167.275	164.603	167.304
DDB_G0270472	46.794	-0.394949	0.688055	-0.574009	0.565962	0.638719	10.4178	68.3971	39.4074	53.5045	47.6022	54.0487	51.7184
DDB_G0270474	0.0906855	2.4812	4.544	0.546038	0.58504	NA	0	0	0	0.453428	0	0	0.151143
DDB_G0270476	1.04178	5.43537	4.56169	1.19152	0.233448	0.305271	5.2089	0	2.60445	0	0	0	0
DDB_G0270478	31.1837	1.8451	0.684862	2.69411	0.00705765	0.0154968	57.2979	52.6131	54.9555	9.52198	11.5669	24.9186	15.3358
DDB_G0270480	83.751	5.89197	0.42939	13.7217	7.53e-43	4.03e-41	229.191	178.885	204.038	2.72057	4.4488	3.50966	3.55967
DDB_G0270482	735.357	-2.97183	0.214009	-13.8864	7.65e-44	4.25e-42	130.222	157.839	144.031	1125.41	1140.23	1123.09	1129.57
DDB_G0270488	2967.28	0.231428	0.203366	1.13799	0.255125	0.329481	3682.69	2830.59	3256.64	2460.75	2915.3	2947.06	2774.37
DDB_G0270490	4.23131	-1.02633	1.62397	-0.631987	0.527395	0.603566	0	5.26131	2.63066	5.66784	3.55904	6.66835	5.29841
DDB_G0270492	31.8539	-4.2946	1.50384	-2.85576	0.00429339	0.0100149	0	5.26131	2.63066	60.3059	56.4998	37.2024	51.336
DDB_G0270494	2.74633	-2.25059	2.2557	-0.997732	0.318409	0.39619	0	0	0	6.80141	6.22832	0.701931	4.57722
DDB_G0270496	141.659	-5.47355	1.0299	-5.31464	1.07e-07	5.58e-07	10.4178	0	5.2089	234.195	238.011	225.671	232.626
DDB_G0270500	156.624	-0.322778	0.249596	-1.2932	0.195942	0.274119	156.267	115.749	136.008	163.007	172.613	175.483	170.368
DDB_G0270502	1.04178	5.43537	4.56169	1.19152	0.233448	0.305271	5.2089	0	2.60445	0	0	0	0
DDB_G0270504	0	NA	NA	NA	NA	NA	0	0	0	0	0	0	0
DDB_G0270506	9.93	0.753209	1.01146	0.744675	0.456468	0.534362	0	26.3066	13.1533	7.70827	7.56296	8.07221	7.78115
DDB_G0270508	0	NA	NA	NA	NA	NA	0	0	0	0	0	0	0
DDB_G0270510	14.0876	-0.175511	0.76561	-0.229243	0.81868	0.858583	5.2089	21.0453	13.1271	16.0967	13.3464	14.7406	14.7279
DDB_G0270512	0	NA	NA	NA	NA	NA	0	0	0	0	0	0	0
DDB_G0270514	0	NA	NA	NA	NA	NA	0	0	0	0	0	0	0
DDB_G0270518	130.925	12.4038	1.22581	10.1188	4.56e-24	9.77e-23	302.116	352.508	327.312	0	0	0	0
DDB_G0270520	0	NA	NA	NA	NA	NA	0	0	0	0	0	0	0
DDB_G0270522	55.2928	3.37841	0.798888	4.22889	2.35e-05	8.67e-05	36.4623	205.191	120.827	11.3357	9.78736	13.6877	11.6036
DDB_G0270524	2.09404	6.43756	2.87231	2.24125	0.02501	0.0472869	5.2089	5.26131	5.23511	0	0	0	0
DDB_G0270528	12.6716	-1.75886	1.13794	-1.54565	0.122188	0.185722	5.2089	5.26131	5.23511	19.7241	12.4566	20.707	17.6292
DDB_G0270530	0.140386	2.04809	4.52016	0.453101	0.650476	NA	0	0	0	0	0	0.701931	0.233977
DDB_G0270532	0	NA	NA	NA	NA	NA	0	0	0	0	0	0	0
DDB_G0270536	3.13582	7.02062	2.55082	2.7523	0.00591776	0.0132711	10.4178	5.26131	7.83955	0	0	0	0
DDB_G0270538	31.2892	0.973075	0.817898	1.18973	0.234154	0.306159	78.1334	10.5226	44.328	25.1652	24.0235	18.6012	22.5966
DDB_G0270540	18.4284	-2.3743	1.10043	-2.1576	0.0309587	0.0569916	10.4178	0	5.2089	21.9912	30.2518	29.4811	27.2414
DDB_G0270544	51.3795	-0.886943	0.484804	-1.82949	0.0673269	0.111899	20.8356	47.3518	34.0937	61.6662	56.4998	70.5441	62.9033
DDB_G0270548	1.18829	3.43826	3.59267	0.957022	0.338556	0.417773	0	5.26131	2.63066	0.680141	0	0	0.226714
DDB_G0270550	27.6132	-2.38016	0.878958	-2.70793	0.00677044	0.0149584	10.4178	5.26131	7.83955	41.9421	36.925	43.5197	40.7956
DDB_G0270552	460.427	-0.237917	0.261049	-0.91139	0.36209	0.43959	510.472	320.94	415.706	524.842	457.337	488.544	490.241
DDB_G0270554	11.6443	0.831688	0.815794	1.01948	0.307974	0.385224	5.2089	26.3066	15.7577	7.25484	10.6771	8.77414	8.90203
DDB_G0270556	16.8006	2.66854	0.832714	3.20463	0.00135235	0.00351146	41.6712	26.3066	33.9889	6.80141	7.11808	2.10579	5.34176
DDB_G0270558	1.86452	-1.69313	1.76008	-0.961962	0.336069	0.415121	0	0	0	3.40071	3.11416	2.80773	3.10753
DDB_G0270560	392.668	-1.1847	0.191244	-6.19469	5.84e-10	3.94e-09	213.565	231.498	222.531	486.528	518.285	513.463	506.092
DDB_G0270562	308.766	-0.742395	0.216195	-3.43392	0.000594924	0.001679	182.311	257.804	220.058	362.289	355.014	386.413	367.905
DDB_G0270564	14.1081	-1.21973	0.964209	-1.265	0.20587	0.285836	10.4178	5.26131	7.83955	15.87	15.1259	23.8657	18.2872
DDB_G0270566	240.6	0.186992	0.333314	0.56101	0.574791	0.646215	203.147	315.679	259.413	185.679	268.263	230.233	228.058
DDB_G0270568	69.7714	0.898663	0.321797	2.79264	0.00522799	0.0119649	114.596	78.9197	96.7577	55.7716	49.3817	50.1881	51.7805
DDB_G0270570	0	NA	NA	NA	NA	NA	0	0	0	0	0	0	0
DDB_G0270572	22.7462	-1.56105	0.784125	-1.99082	0.0465012	0.0813703	5.2089	15.7839	10.4964	31.7399	32.9211	28.0773	30.9128
DDB_G0270574	1.18421	-1.05598	2.24879	-0.469579	0.638656	0.703612	0	0	0	3.62742	0.88976	1.40386	1.97368
DDB_G0270578	23.2106	-1.60577	0.802972	-1.99978	0.0455237	0.0798745	15.6267	5.26131	10.444	36.9543	28.0274	30.183	31.7216
DDB_G0270580	3.09443	-2.42574	1.76627	-1.37337	0.169639	0.242015	0	0	0	4.9877	3.11416	7.37028	5.15738
DDB_G0270582	0.0906855	2.4812	4.544	0.546038	0.58504	NA	0	0	0	0.453428	0	0	0.151143
DDB_G0270584	6.27164	8.02063	1.99574	4.01887	5.85e-05	0.000201772	20.8356	10.5226	15.6791	0	0	0	0
DDB_G0270586	1.22315	3.04241	3.71332	0.819323	0.412602	0.49041	5.2089	0	2.60445	0.906855	0	0	0.302285
DDB_G0270588	0	NA	NA	NA	NA	NA	0	0	0	0	0	0	0
DDB_G0270590	1265.96	-1.17588	0.408349	-2.8796	0.00398174	0.00936311	453.174	989.127	721.151	1400.41	1705.23	1781.85	1629.16
DDB_G0270592	0.908733	-0.646534	2.04423	-0.316273	0.751795	0.801692	0	0	0	1.36028	1.77952	1.40386	1.51456
DDB_G0270594	0	NA	NA	NA	NA	NA	0	0	0	0	0	0	0
DDB_G0270596	12.9543	-1.06654	0.952094	-1.1202	0.262629	0.337788	10.4178	5.26131	7.83955	17.6837	12.4566	18.9521	16.3642
DDB_G0270598	0.318338	0.876227	4.45804	0.19655	0.84418	NA	0	0	0	0	0.88976	0.701931	0.530564
DDB_G0270600	0	NA	NA	NA	NA	NA	0	0	0	0	0	0	0
DDB_G0270602	0	NA	NA	NA	NA	NA	0	0	0	0	0	0	0
DDB_G0270604	0	NA	NA	NA	NA	NA	0	0	0	0	0	0	0
DDB_G0270606	40.2685	5.20527	0.562655	9.25126	2.22e-20	3.69e-19	83.3423	110.488	96.915	3.62742	1.77952	2.10579	2.50424
DDB_G0270610	0	NA	NA	NA	NA	NA	0	0	0	0	0	0	0
DDB_G0270614	0	NA	NA	NA	NA	NA	0	0	0	0	0	0	0
DDB_G0270618	211.631	-2.76934	0.450643	-6.14531	7.98e-10	5.33e-09	26.0445	68.3971	47.2208	380.879	288.727	294.109	321.239
DDB_G0270620	0	NA	NA	NA	NA	NA	0	0	0	0	0	0	0
DDB_G0270622	68.1567	-2.71711	0.62633	-4.33814	1.44e-05	5.52e-05	10.4178	21.0453	15.7315	112.45	99.6531	97.2175	103.107
DDB_G0270624	0	NA	NA	NA	NA	NA	0	0	0	0	0	0	0
DDB_G0270626	202.34	0.171264	0.40484	0.423041	0.672265	0.733702	302.116	131.533	216.824	187.719	206.424	183.906	192.683
DDB_G0270628	0.362742	0.646194	4.45064	0.145191	0.88456	NA	0	0	0	1.81371	0	0	0.60457
DDB_G0270630	0	NA	NA	NA	NA	NA	0	0	0	0	0	0	0
DDB_G0270632	21.7622	-2.64643	1.06179	-2.49243	0.0126872	0.0261347	0	10.5226	5.26131	33.7804	32.9211	31.5869	32.7628
DDB_G0270634	698.158	-1.9128	0.65305	-2.92903	0.00340025	0.00810801	93.7601	431.428	262.594	942.903	1017.89	1004.81	988.534
DDB_G0270636	7.03972	1.14873	1.02324	1.12264	0.26159	0.33657	5.2089	15.7839	10.4964	3.62742	3.55904	7.01931	4.73526
DDB_G0270638	4.2578	5.88142	2.97437	1.97737	0.0480002	0.0835688	20.8356	0	10.4178	0.453428	0	0	0.151143
DDB_G0270640	717.223	-0.230276	0.258249	-0.891682	0.372563	0.450669	500.054	799.72	649.887	778.535	725.154	782.653	762.114
DDB_G0270642	196.47	-4.10612	0.564754	-7.27063	3.58e-13	3.32e-12	31.2534	5.26131	18.2573	325.108	300.294	320.432	315.278
DDB_G0270644	11.2724	4.209	1.45414	2.8945	0.00379758	0.0089702	41.6712	10.5226	26.0969	1.36028	0	2.80773	1.38934
DDB_G0270646	10.2663	-2.56178	1.55759	-1.64471	0.10003	0.156971	0	5.26131	2.63066	19.9508	10.6771	15.4425	15.3568
DDB_G0270648	2.10453	6.44403	4.44606	1.44938	0.147232	0.215857	0	10.5226	5.26131	0	0	0	0
DDB_G0270650	9.40746	8.60561	1.75693	4.89809	9.68e-07	4.44e-06	31.2534	15.7839	23.5187	0	0	0	0
DDB_G0270652	2.08356	6.43089	4.44712	1.44608	0.148155	0.215857	10.4178	0	5.2089	0	0	0	0
DDB_G0270654	1.05226	5.44259	4.56113	1.19325	0.23277	0.305271	0	5.26131	2.63066	0	0	0	0
DDB_G0270656	1.04178	5.43537	4.56169	1.19152	0.233448	0.305271	5.2089	0	2.60445	0	0	0	0
DDB_G0270658	1264.03	3.24654	0.511528	6.34675	2.2e-10	1.55e-09	1401.19	4056.47	2728.83	292.914	275.826	293.758	287.499
DDB_G0270660	0.160879	1.81667	4.50374	0.403369	0.686677	NA	0	0	0	0.453428	0	0.350966	0.268131
DDB_G0270662	0	NA	NA	NA	NA	NA	0	0	0	0	0	0	0
DDB_G0270664	41.1151	-3.01305	0.877454	-3.43386	0.000595059	0.001679	5.2089	10.5226	7.86576	70.9614	62.7281	56.1545	63.2813
DDB_G0270666	221.47	-2.3135	0.341454	-6.77543	1.24e-11	9.91e-11	67.7156	63.1358	65.4257	316.492	361.687	298.321	325.5
DDB_G0270668	526.232	-0.893719	0.465835	-1.91853	0.0550434	0.0940947	505.263	189.407	347.335	673.793	664.651	598.046	645.497
DDB_G0270670	1289.31	-0.073853	0.266465	-0.277159	0.781658	0.827303	974.063	1525.78	1249.92	1242.85	1443.19	1260.67	1315.57
DDB_G0270672	0.231072	1.30918	4.47553	0.292519	0.76989	NA	0	0	0	0.453428	0	0.701931	0.38512
DDB_G0270678	60.6752	-0.931874	0.487361	-1.91208	0.055866	0.095206	57.2979	21.0453	39.1716	66.4271	86.3067	72.2989	75.0109
DDB_G0270680	1.32024	-1.21217	2.28261	-0.531044	0.595388	0.664365	0	0	0	4.30756	0.88976	1.40386	2.20039
DDB_G0270682	35.1895	1.49972	0.408439	3.67184	0.000240806	0.000737519	57.2979	57.8745	57.5862	21.9912	19.1298	19.6541	20.2584
DDB_G0270686	598.748	-0.496904	0.559772	-0.887691	0.374707	0.452766	218.774	741.845	480.309	655.43	694.013	683.681	677.708
DDB_G0270688	2.95136	1.89964	1.41116	1.34616	0.178251	0.25267	5.2089	5.26131	5.23511	1.36028	2.2244	0.701931	1.42887
DDB_G0270690	40.4571	-2.98844	0.922676	-3.23888	0.00120001	0.00315524	5.2089	10.5226	7.86576	70.2813	45.3778	70.8951	62.1847
DDB_G0270692	143.83	-0.267556	0.282178	-0.948181	0.343037	0.422217	161.476	94.7037	128.09	150.991	149.48	162.497	154.323
DDB_G0270694	143.075	1.08419	0.273004	3.97135	7.15e-05	0.000242951	223.983	194.669	209.326	86.378	96.9838	113.362	98.9079
DDB_G0270698	14.5487	-1.2747	0.935353	-1.36281	0.172943	0.246126	10.4178	5.26131	7.83955	16.5501	17.3503	23.1637	19.0214
DDB_G0270700	54.488	3.82937	0.536431	7.13861	9.43e-13	8.35e-12	72.9245	173.623	123.274	9.97541	8.8976	7.01931	8.63077
DDB_G0270704	24.4399	2.01329	0.910745	2.2106	0.0270638	0.0506409	15.6267	73.6584	44.6425	15.6433	5.33856	11.9328	10.9715
DDB_G0270706	12.9711	5.49536	1.00494	5.46833	4.54e-08	2.48e-07	20.8356	42.0905	31.463	1.13357	0.44488	0.350966	0.643138
DDB_G0270708	45.3705	0.366966	0.631997	0.580646	0.561479	0.634611	20.8356	84.181	52.5083	44.4359	32.4762	44.9236	40.6119
DDB_G0270710	0	NA	NA	NA	NA	NA	0	0	0	0	0	0	0
DDB_G0270714	9.43891	8.60943	1.76166	4.88711	1.02e-06	4.67e-06	15.6267	31.5679	23.5973	0	0	0	0
DDB_G0270718	144.25	0.510149	0.384412	1.32709	0.184479	0.260361	109.387	242.02	175.704	127.186	123.677	118.977	123.28
DDB_G0270720	29.6943	-5.6849	1.46457	-3.8816	0.00010377	0.000342324	0	0	0	50.3305	47.6022	50.5391	49.4906
DDB_G0270722	2.63501	-0.0483429	1.75365	-0.027567	0.978008	0.983442	5.2089	0	2.60445	4.08085	1.77952	2.10579	2.65539
DDB_G0270724	6.29261	8.02447	1.99903	4.01418	5.97e-05	0.000205444	10.4178	21.0453	15.7315	0	0	0	0
DDB_G0270726	2909.51	7.50075	0.261187	28.7179	2.28e-181	1.4e-178	6698.64	7728.87	7213.76	38.9948	49.8266	31.2359	40.0191
DDB_G0270728	0	NA	NA	NA	NA	NA	0	0	0	0	0	0	0
DDB_G0270730	110.937	2.19723	0.366819	5.98995	2.1e-09	1.34e-08	234.4	184.146	209.273	55.9983	33.8109	46.3275	45.3789
DDB_G0270732	0	NA	NA	NA	NA	NA	0	0	0	0	0	0	0
DDB_G0270734	30.5879	-0.820161	0.745144	-1.10067	0.271039	0.347471	5.2089	36.8292	21.019	39.4482	27.5826	43.8707	36.9672
DDB_G0270736	2.08356	6.43089	4.44712	1.44608	0.148155	0.215857	10.4178	0	5.2089	0	0	0	0
DDB_G0270738	26.3428	-5.51493	1.48877	-3.70435	0.000211934	0.00065601	0	0	0	48.7435	35.5904	47.3804	43.9047
DDB_G0270740	0	NA	NA	NA	NA	NA	0	0	0	0	0	0	0
DDB_G0270742	297.884	2.1434	0.42085	5.09301	3.52e-07	1.72e-06	369.832	741.845	555.838	97.7136	136.133	143.896	125.914
DDB_G0270744	174.677	-1.85119	0.318643	-5.80962	6.26e-09	3.79e-08	46.8801	89.4423	68.1612	238.956	246.464	251.642	245.687
DDB_G0270746	126.79	-1.93047	0.382412	-5.04815	4.46e-07	2.14e-06	41.6712	52.6131	47.1422	166.635	192.633	180.396	179.888
DDB_G0270750	66.2025	3.33104	0.37884	8.79274	1.46e-18	2.15e-17	109.387	178.885	144.136	15.87	14.2362	12.6348	14.247
DDB_G0270752	224.948	-1.77591	0.303192	-5.85738	4.7e-09	2.89e-08	62.5067	121.01	91.7585	316.266	295.4	329.557	313.741
DDB_G0270754	402.483	-1.50537	0.362826	-4.149	3.34e-05	0.000120497	119.805	263.066	191.435	544.34	570.336	514.867	543.181
DDB_G0270756	10.7354	1.70361	0.868715	1.96107	0.0498707	0.0863894	10.4178	26.3066	18.3622	4.08085	4.4488	8.42318	5.65094
DDB_G0270758	18.9261	-0.0692534	1.01846	-0.0679984	0.945787	0.959203	0	36.8292	18.4146	21.3111	18.2401	18.2502	19.2671
DDB_G0270760	1510.04	1.82029	0.404752	4.49729	6.88e-06	2.8e-05	3557.68	1741.5	2649.59	640.24	717.591	893.208	750.346
DDB_G0270762	13.8154	7.12968	1.62547	4.38622	1.15e-05	4.51e-05	20.8356	47.3518	34.0937	0	0.88976	0	0.296587
DDB_G0270764	15.3726	-2.07629	1.07603	-1.92958	0.0536587	0.0919983	5.2089	5.26131	5.23511	21.3111	24.0235	21.0579	22.1309
DDB_G0270766	294.821	-0.342767	0.197499	-1.73554	0.0826458	0.133213	260.445	247.282	253.863	323.067	340.778	302.532	322.126
DDB_G0270768	0	NA	NA	NA	NA	NA	0	0	0	0	0	0	0
DDB_G0270770	1.04178	5.43537	4.56169	1.19152	0.233448	0.305271	5.2089	0	2.60445	0	0	0	0
DDB_G0270772	0	NA	NA	NA	NA	NA	0	0	0	0	0	0	0
DDB_G0270774	143.208	1.37984	0.574513	2.40176	0.0163166	0.0327121	328.16	126.272	227.216	115.397	59.169	87.0395	87.202
DDB_G0270776	293.152	0.232657	0.207331	1.12215	0.261799	0.336799	286.489	357.769	322.129	295.862	270.487	255.152	273.834
DDB_G0270778	84.25	1.15792	0.567017	2.04212	0.0411397	0.0731357	57.2979	194.669	125.983	58.2654	58.7242	52.2939	56.4278
DDB_G0270780	0	NA	NA	NA	NA	NA	0	0	0	0	0	0	0
DDB_G0270784	2420.17	1.43768	0.341247	4.21302	2.52e-05	9.26e-05	5094.3	2693.79	3894.05	1454.82	1499.69	1358.24	1437.58
DDB_G0270786	62.964	2.41374	0.383313	6.29704	3.03e-10	2.11e-09	119.805	126.272	123.038	25.1652	16.9054	26.6734	22.9147
DDB_G0270788	0	NA	NA	NA	NA	NA	0	0	0	0	0	0	0
DDB_G0270790	1.04178	5.43537	4.56169	1.19152	0.233448	0.305271	5.2089	0	2.60445	0	0	0	0
DDB_G0270792	0	NA	NA	NA	NA	NA	0	0	0	0	0	0	0
DDB_G0270794	0	NA	NA	NA	NA	NA	0	0	0	0	0	0	0
DDB_G0270796	0	NA	NA	NA	NA	NA	0	0	0	0	0	0	0
DDB_G0270798	1.04178	5.43537	4.56169	1.19152	0.233448	0.305271	5.2089	0	2.60445	0	0	0	0
DDB_G0270800	31.268	2.62825	0.443328	5.92845	3.06e-09	1.92e-08	67.7156	57.8745	62.7951	8.84184	10.6771	11.2309	10.25
DDB_G0270802	11.6312	-1.60801	1.10993	-1.44875	0.147406	0.215857	10.4178	0	5.2089	17.6837	16.0157	14.0386	15.9127
DDB_G0270804	0	NA	NA	NA	NA	NA	0	0	0	0	0	0	0
DDB_G0270806	196.115	-0.791441	0.362455	-2.18356	0.0289948	0.0537618	88.5512	184.146	136.349	211.071	260.255	236.551	235.959
DDB_G0270808	160.233	0.0685154	0.237041	0.289045	0.772547	0.819231	151.058	178.885	164.971	160.513	146.81	163.901	157.075
DDB_G0270810	5.83753	-3.3462	1.60147	-2.08946	0.0366664	0.0661421	0	0	0	12.2425	7.11808	9.82704	9.72922
DDB_G0270812	0.416801	0.465025	4.38304	0.106096	0.915506	NA	0	0	0	0.680141	0	1.40386	0.694668
DDB_G0270814	24.0441	-5.38413	1.49605	-3.59888	0.000319585	0.000952112	0	0	0	47.3832	32.4762	40.3611	40.0735
DDB_G0270816	121.584	1.44967	0.299302	4.8435	1.28e-06	5.75e-06	182.311	210.453	196.382	82.9772	72.5154	59.6642	71.719
DDB_G0270818	6.06177	-3.39604	1.54788	-2.19399	0.0282361	0.0525759	0	0	0	10.8823	8.8976	10.529	10.1029
DDB_G0270820	0	NA	NA	NA	NA	NA	0	0	0	0	0	0	0
DDB_G0270822	0	NA	NA	NA	NA	NA	0	0	0	0	0	0	0
DDB_G0270824	8.38665	8.43899	1.77258	4.76085	1.93e-06	8.52e-06	15.6267	26.3066	20.9666	0	0	0	0
DDB_G0270826	76.6461	1.77411	0.64364	2.75636	0.00584479	0.0132528	166.685	99.965	133.325	49.6503	17.7952	49.1352	38.8602
DDB_G0270828	76.6978	-5.5924	1.45643	-3.83979	0.000123139	0.000401896	5.2089	0	2.60445	138.295	121.007	118.977	126.093
DDB_G0270830	49.3475	-1.93693	0.589337	-3.28663	0.00101393	0.00271843	15.6267	21.0453	18.336	73.0018	64.0627	73.0009	70.0218
DDB_G0270834	1264.26	-0.144803	0.175361	-0.825741	0.408951	0.487105	1026.15	1352.16	1189.16	1365.5	1270.13	1307.35	1314.33
DDB_G0270836	768.289	3.58674	0.463857	7.73243	1.06e-14	1.12e-13	1000.11	2414.94	1707.53	146.911	160.157	119.328	142.132
DDB_G0270838	324.596	3.81778	0.183827	20.7684	8.36e-96	1.42e-93	677.156	789.197	733.177	49.4236	55.61	51.592	52.2085
DDB_G0270840	0	NA	NA	NA	NA	NA	0	0	0	0	0	0	0
DDB_G0270842	3.13582	7.02062	2.55082	2.7523	0.00591776	0.0132711	10.4178	5.26131	7.83955	0	0	0	0
DDB_G0270848	3.96071	2.46277	1.72041	1.4315	0.152287	0.221031	10.4178	5.26131	7.83955	2.72057	0	1.40386	1.37481
DDB_G0270850	19.4328	0.176277	0.758042	0.232542	0.816117	0.856546	31.2534	10.5226	20.888	18.3638	12.4566	24.5676	18.4627
DDB_G0270852	3.1463	7.02444	2.55196	2.75256	0.00591307	0.0132711	5.2089	10.5226	7.86576	0	0	0	0
DDB_G0270854	89.0054	-3.41588	0.668011	-5.11351	3.16e-07	1.55e-06	5.2089	21.0453	13.1271	145.55	138.803	134.42	139.591
DDB_G0270856	106.474	-0.22317	0.290364	-0.768587	0.442138	0.520679	88.5512	105.226	96.8888	116.984	105.437	116.17	112.864
DDB_G0270858	111.928	-0.708487	0.362181	-1.95617	0.0504453	0.0873025	62.5067	99.965	81.2359	151.898	116.114	129.155	132.389
DDB_G0270860	6.30309	8.02671	2.35446	3.40915	0.000651658	0.00181917	5.2089	26.3066	15.7577	0	0	0	0
DDB_G0270862	2.09404	6.43756	2.87231	2.24125	0.02501	0.0472869	5.2089	5.26131	5.23511	0	0	0	0
DDB_G0270864	1639.71	-0.214706	0.254554	-0.84346	0.398971	0.477433	1823.11	1168.01	1495.56	1641.41	1786.64	1779.4	1735.81
DDB_G0270866	56.8088	-2.16899	0.576361	-3.76325	0.000167717	0.00053121	15.6267	21.0453	18.336	81.1635	84.0823	82.126	82.4573
DDB_G0270868	58.4679	-5.19444	1.45752	-3.56389	0.000365399	0.00107784	0	5.26131	2.63066	100.207	87.1965	99.6743	95.6927
DDB_G0270870	387.363	0.709937	0.173995	4.08021	4.5e-05	0.000158748	453.174	557.699	505.437	319.213	290.507	316.22	308.647
DDB_G0270872	0	NA	NA	NA	NA	NA	0	0	0	0	0	0	0
DDB_G0270878	0	NA	NA	NA	NA	NA	0	0	0	0	0	0	0
DDB_G0270880	1209.07	0.337128	0.123687	2.72566	0.00641731	0.0142667	1406.4	1357.42	1381.91	1079.16	1041.02	1161.35	1093.84
DDB_G0270882	20.0643	-0.920867	0.74808	-1.23097	0.218333	0.300681	5.2089	21.0453	13.1271	28.5659	22.6889	22.8128	24.6892
DDB_G0270884	2321.36	3.42658	0.107013	32.0201	5.73e-225	6.33e-222	5287.03	4898.28	5092.66	455.921	467.569	498.02	473.837
DDB_G0270886	16.7733	9.43899	1.49732	6.30393	2.9e-10	2.02e-09	31.2534	52.6131	41.9333	0	0	0	0
DDB_G0270888	9.40746	8.60561	1.75693	4.89809	9.68e-07	4.44e-06	31.2534	15.7839	23.5187	0	0	0	0
DDB_G0270890	1.04178	5.43537	4.56169	1.19152	0.233448	0.305271	5.2089	0	2.60445	0	0	0	0
DDB_G0270892	0	NA	NA	NA	NA	NA	0	0	0	0	0	0	0
DDB_G0270894	59.7109	-0.0816307	0.417533	-0.195507	0.844996	0.880743	46.8801	68.3971	57.6386	51.6907	61.3934	70.1931	61.0924
DDB_G0270896	1.04178	5.43537	4.56169	1.19152	0.233448	0.305271	5.2089	0	2.60445	0	0	0	0
DDB_G0270898	41.3955	1.20656	0.425402	2.83627	0.00456432	0.0105887	67.7156	57.8745	62.7951	27.2057	22.244	31.9379	27.1292
DDB_G0270902	341.409	-1.21058	0.299659	-4.03987	5.35e-05	0.000185639	234.4	147.317	190.859	498.997	441.321	385.009	441.776
DDB_G0270904	0	NA	NA	NA	NA	NA	0	0	0	0	0	0	0
DDB_G0270906	1.91687	-1.71904	1.8789	-0.914919	0.360234	0.437481	0	0	0	1.81371	3.55904	4.21159	3.19478
DDB_G0270910	618.089	-1.4325	0.209172	-6.84843	7.47e-12	6.12e-11	359.414	252.543	305.978	824.331	781.654	872.501	826.162
DDB_G0270912	0	NA	NA	NA	NA	NA	0	0	0	0	0	0	0
DDB_G0270914	37.3601	6.41877	0.690011	9.30241	1.37e-20	2.33e-19	72.9245	110.488	91.7061	0.906855	1.77952	0.701931	1.12944
DDB_G0270916	73.6114	-2.3753	0.580897	-4.08903	4.33e-05	0.000153253	15.6267	26.3066	20.9666	113.584	122.342	90.1982	108.708
DDB_G0270918	154.987	0.471068	0.312568	1.50709	0.131788	0.197565	135.431	236.759	186.095	123.559	132.129	147.055	134.248
DDB_G0270920	127.814	-3.06663	0.56419	-5.43546	5.47e-08	2.95e-07	26.0445	21.0453	23.5449	218.325	218.881	154.776	197.327
DDB_G0270922	554.674	0.156961	0.166197	0.944427	0.344952	0.423912	651.112	531.393	591.252	553.862	536.525	500.477	530.288
DDB_G0270924	24.6984	3.07581	0.94419	3.25762	0.0011235	0.00297319	26.0445	78.9197	52.4821	9.74869	6.6732	2.10579	6.1759
DDB_G0270926	0.632319	-0.108334	2.39261	-0.0452785	0.963885	0.972787	0	0	0	0.680141	1.77952	0.701931	1.05386
DDB_G0270928	225.397	1.30143	0.267629	4.86282	1.16e-06	5.25e-06	432.338	268.327	350.333	148.724	137.913	139.684	142.107
DDB_G0270932	844.737	-0.250597	0.228935	-1.09462	0.273683	0.349481	901.139	615.574	758.356	900.054	845.272	961.646	902.324
DDB_G0270934	73.3192	1.4288	0.29427	4.85541	1.2e-06	5.43e-06	119.805	115.749	117.777	43.529	40.4841	47.0294	43.6808
DDB_G0270936	64.3842	-2.913	0.679563	-4.28658	1.81e-05	6.85e-05	10.4178	15.7839	13.1009	94.9931	92.9799	107.746	98.5732
DDB_G0270938	0.088976	3.01237	4.55954	0.660674	0.508821	NA	0	0	0	0	0.44488	0	0.148293
DDB_G0270940	7.31239	-1.98631	1.65116	-1.20298	0.228986	0.305271	5.2089	0	2.60445	5.44113	14.681	11.2309	10.451
DDB_G0270942	1.04178	5.43537	4.56169	1.19152	0.233448	0.305271	5.2089	0	2.60445	0	0	0	0
DDB_G0270946	121.512	0.242008	0.722068	0.335159	0.737505	0.789847	41.6712	226.237	133.954	119.251	119.673	100.727	113.217
DDB_G0270948	76.7963	0.206877	0.704949	0.293464	0.769168	0.816118	140.64	26.3066	83.4734	78.2163	64.0627	74.7557	72.3449
DDB_G0270950	3.13582	7.02062	2.55082	2.7523	0.00591776	0.0132711	10.4178	5.26131	7.83955	0	0	0	0
DDB_G0270952	1542.13	15.962	1.26077	12.6605	9.78e-37	4.09e-35	2854.47	4856.19	3855.33	0	0	0	0
DDB_G0270954	804.818	15.0239	1.20352	12.4833	9.21e-36	3.59e-34	2172.11	1851.98	2012.05	0	0	0	0
DDB_G0270958	51.2039	-0.886031	0.592095	-1.49644	0.13454	0.20114	41.6712	26.3066	33.9889	77.0827	41.8187	69.1402	62.6805
DDB_G0270962	76.4483	11.6276	1.2426	9.35749	8.16e-21	1.41e-19	182.311	199.93	191.121	0	0	0	0
DDB_G0270964	160.741	3.62523	0.382164	9.48604	2.4e-21	4.33e-20	411.503	305.156	358.329	25.8454	22.244	38.9572	29.0155
DDB_G0270966	68.5287	-2.47536	0.596172	-4.15209	3.29e-05	0.000119035	26.0445	10.5226	18.2836	97.9404	114.779	93.3569	102.025
DDB_G0270968	0	NA	NA	NA	NA	NA	0	0	0	0	0	0	0
DDB_G0270970	0.458725	0.341397	4.44246	0.0768487	0.938744	NA	0	0	0	0	0.88976	1.40386	0.764541
DDB_G0270972	600.196	0.733562	0.294034	2.49482	0.0126022	0.0259859	578.187	999.65	788.919	479.726	475.577	467.837	474.38
DDB_G0270974	2.5457	2.73234	2.20006	1.24194	0.21426	0.295625	10.4178	0	5.2089	0.906855	0	1.40386	0.770239
DDB_G0270976	2.89629	-0.228562	1.63247	-0.14001	0.888652	0.914161	0	5.26131	2.63066	2.94728	3.11416	3.15869	3.07338
DDB_G0270978	17.2713	5.77259	0.882794	6.539	6.19e-11	4.6e-10	31.2534	52.6131	41.9333	0.453428	1.33464	0.701931	0.83
DDB_G0270980	6.38027	-0.454709	1.14656	-0.396587	0.691672	0.750854	5.2089	5.26131	5.23511	7.48156	6.22832	7.72125	7.14371
DDB_G0270982	2.36271	-2.04223	2.01341	-1.01432	0.310431	0.387837	0	0	0	5.21442	1.33464	5.26449	3.93785
DDB_G0270984	11567.3	2.90213	0.269166	10.7819	4.19e-27	1.09e-25	29503.2	18667.1	24085.2	2983.1	3280.55	3402.61	3222.09
DDB_G0270986	3.54826	3.41145	1.60143	2.13025	0.0331507	0.0605222	10.4178	5.26131	7.83955	1.36028	0	0.701931	0.687405
DDB_G0270988	17.9966	2.69914	0.61704	4.37434	1.22e-05	4.73e-05	52.089	21.0453	36.5671	5.89456	5.33856	5.61545	5.61619
DDB_G0270990	1871.11	2.65378	0.244895	10.8364	2.31e-27	6.14e-26	4260.88	3293.58	3777.23	607.82	693.123	500.126	600.356
DDB_G0270992	3514.25	-0.75252	0.172465	-4.36333	1.28e-05	4.95e-05	2734.67	2246.58	2490.63	3799.5	4506.63	4283.89	4196.67
DDB_G0270994	936.911	0.435313	0.182739	2.38215	0.0172117	0.0342312	979.272	1241.67	1110.47	834.307	875.079	754.225	821.204
DDB_G0270996	78.0505	0.486604	0.354656	1.37205	0.170049	0.24257	72.9245	115.749	94.3367	74.3621	68.9564	58.2603	67.1929
DDB_G0270998	1.14295	3.90642	3.55409	1.09914	0.271709	0.347805	0	5.26131	2.63066	0.453428	0	0	0.151143
DDB_G0271000	31.2492	-1.7216	0.752965	-2.28642	0.0222296	0.0430323	10.4178	15.7839	13.1009	33.3269	52.4958	44.2217	43.3481
DDB_G0271002	50.9481	-0.87387	0.450613	-1.93929	0.0524658	0.0901771	41.6712	26.3066	33.9889	64.8401	60.5037	61.419	62.2543
DDB_G0271006	2.08356	6.43089	4.44712	1.44608	0.148155	0.215857	10.4178	0	5.2089	0	0	0	0
DDB_G0271008	0	NA	NA	NA	NA	NA	0	0	0	0	0	0	0
DDB_G0271010	1.82866	-1.67455	1.88088	-0.890302	0.373304	0.451367	0	0	0	3.85413	1.77952	3.50966	3.04777
DDB_G0271014	85.26	-0.0433573	0.305528	-0.14191	0.887151	0.913042	78.1334	89.4423	83.7879	86.8314	82.7477	89.1453	86.2414
DDB_G0271016	487.738	-1.17522	0.387919	-3.02954	0.00244924	0.00601037	171.894	384.076	277.985	606.913	673.548	602.257	627.573
DDB_G0271018	8.33423	8.43038	4.33891	1.94297	0.0520196	0.0894659	41.6712	0	20.8356	0	0	0	0
DDB_G0271020	2.10453	6.44403	4.44606	1.44938	0.147232	0.215857	0	10.5226	5.26131	0	0	0	0
DDB_G0271022	190.962	1.60733	0.363185	4.42564	9.62e-06	3.8e-05	218.774	420.905	319.839	92.7259	112.555	109.852	105.044
DDB_G0271024	33.4048	0.422399	0.512116	0.824811	0.409479	0.487576	26.0445	52.6131	39.3288	25.8454	35.1455	27.3753	29.4554
DDB_G0271026	9.3865	8.60239	2.33479	3.68444	0.00022921	0.000706117	41.6712	5.26131	23.4662	0	0	0	0
DDB_G0271028	4.63467	3.89433	1.61216	2.41559	0.0157097	0.0316372	10.4178	10.5226	10.4702	0.453428	1.77952	0	0.744316
DDB_G0271030	0	NA	NA	NA	NA	NA	0	0	0	0	0	0	0
DDB_G0271032	29.9932	-1.33232	0.639501	-2.08338	0.0372169	0.0670803	20.8356	10.5226	15.6791	39.4482	39.1494	40.0101	39.5359
DDB_G0271034	73.2684	-2.82639	0.638689	-4.4253	9.63e-06	3.81e-05	10.4178	21.0453	15.7315	96.5801	119.673	118.626	111.626
DDB_G0271038	0	NA	NA	NA	NA	NA	0	0	0	0	0	0	0
DDB_G0271040	120.874	-0.495531	0.429669	-1.15329	0.248793	0.322624	52.089	142.055	97.0722	132.628	137.913	139.684	136.742
DDB_G0271042	1.14322	-1.00128	2.13355	-0.469303	0.638853	0.703759	0	0	0	2.72057	0.88976	2.10579	1.90537
DDB_G0271044	94.031	-2.25448	0.468185	-4.81536	1.47e-06	6.59e-06	36.4623	21.0453	28.7538	132.401	145.476	134.771	137.549
DDB_G0271046	10.4597	8.75843	1.63414	5.35966	8.34e-08	4.41e-07	31.2534	21.0453	26.1493	0	0	0	0
DDB_G0271050	152.807	-0.307862	0.402084	-0.765666	0.443875	0.522389	98.969	168.362	133.666	146.684	209.983	140.035	165.567
DDB_G0271052	1992.82	0.443887	0.156406	2.83804	0.00453912	0.0105369	2317.96	2420.2	2369.08	1556.39	1758.17	1911.36	1741.97
DDB_G0271054	64.2082	-0.259152	0.479096	-0.540919	0.588563	0.658603	83.3423	31.5679	57.4551	79.5765	59.169	67.3854	68.7103
DDB_G0271056	1.86965	-1.71009	1.93296	-0.884701	0.376318	0.454338	0	0	0	4.76099	1.77952	2.80773	3.11608
DDB_G0271058	607.62	-1.59463	0.269776	-5.91092	3.4e-09	2.13e-08	307.325	242.02	274.673	831.359	698.906	958.487	829.584
DDB_G0271060	2.43555	-2.08176	1.93545	-1.07559	0.282109	0.35821	0	0	0	4.08085	1.77952	6.31738	4.05925
DDB_G0271062	36.197	0.527499	0.655897	0.804241	0.421258	0.49891	72.9245	15.7839	44.3542	35.8208	28.0274	28.4282	30.7588
DDB_G0271066	43.0776	0.652735	0.542175	1.20392	0.228621	0.305271	26.0445	84.181	55.1128	31.0598	35.1455	38.9572	35.0542
DDB_G0271068	233.001	3.55663	0.6289	5.65532	1.56e-08	8.98e-08	281.28	752.368	516.824	66.4271	31.5865	33.3417	43.7851
DDB_G0271070	0	NA	NA	NA	NA	NA	0	0	0	0	0	0	0
DDB_G0271072	54.1169	-0.0739718	0.495104	-0.149407	0.881233	0.908645	26.0445	78.9197	52.4821	55.0915	61.3934	49.1352	55.2067
DDB_G0271074	1.08712	4.48404	3.50117	1.28073	0.200289	0.279317	5.2089	0	2.60445	0.226714	0	0	0.0755713
DDB_G0271076	2.09404	6.43756	2.87231	2.24125	0.02501	0.0472869	5.2089	5.26131	5.23511	0	0	0	0
DDB_G0271078	65.6165	-1.49162	0.555252	-2.68638	0.00722311	0.0158035	15.6267	47.3518	31.4893	99.0739	96.539	69.4912	88.368
DDB_G0271080	0.0906855	2.4812	4.544	0.546038	0.58504	NA	0	0	0	0.453428	0	0	0.151143
DDB_G0271084	16.1369	-1.45858	1.0185	-1.43209	0.152119	0.220845	0	15.7839	7.89197	22.6714	27.1377	15.0915	21.6335
DDB_G0271086	595.824	-1.48741	0.639336	-2.3265	0.019992	0.0392166	109.387	462.996	286.191	768.333	715.367	923.04	802.247
DDB_G0271092	6.02694	3.28286	1.39839	2.3476	0.0188947	0.0372295	26.0445	0	13.0222	0.906855	1.77952	1.40386	1.36341
DDB_G0271094	656.515	-0.0306311	0.539404	-0.056787	0.954715	0.965961	312.534	983.866	648.2	628.677	718.036	639.459	662.058
DDB_G0271096	201.295	0.486282	0.38491	1.26336	0.206458	0.2864	333.369	152.578	242.974	179.331	174.838	166.358	173.509
DDB_G0271098	0.0453428	3.04447	4.56063	0.667554	0.504418	NA	0	0	0	0.226714	0	0	0.0755713
DDB_G0271100	87.9568	-2.66495	0.5628	-4.73516	2.19e-06	9.59e-06	31.2534	10.5226	20.888	145.097	135.688	117.223	132.669
DDB_G0271102	0	NA	NA	NA	NA	NA	0	0	0	0	0	0	0
DDB_G0271104	2.09404	6.43756	2.87231	2.24125	0.02501	0.0472869	5.2089	5.26131	5.23511	0	0	0	0
DDB_G0271106	576.84	1.36342	0.11698	11.6552	2.16e-31	7.05e-30	911.557	910.207	910.882	350.046	355.459	356.932	354.146
DDB_G0271108	78.66	-2.11928	0.522183	-4.0585	4.94e-05	0.000172684	10.4178	42.0905	26.2542	124.919	103.212	112.66	113.597
DDB_G0271110	0	NA	NA	NA	NA	NA	0	0	0	0	0	0	0
DDB_G0271112	78.3717	1.66912	0.59346	2.81252	0.00491556	0.0113463	208.356	57.8745	133.115	42.3955	41.8187	41.414	41.876
DDB_G0271114	43.4657	-0.549553	0.458271	-1.19919	0.230456	0.305271	26.0445	42.0905	34.0675	51.9175	48.4919	48.7842	49.7312
DDB_G0271118	7.87017	2.58213	0.902307	2.8617	0.00421379	0.00984586	20.8356	10.5226	15.6791	1.81371	2.66928	3.50966	2.66422
DDB_G0271120	253.775	-1.58918	0.251885	-6.30916	2.81e-10	1.95e-09	119.805	110.488	115.146	361.609	332.325	344.648	346.194
DDB_G0271122	220.318	0.990351	0.186481	5.31074	1.09e-07	5.69e-07	322.952	305.156	314.054	166.181	153.928	153.372	157.827
DDB_G0271124	90.6017	0.762748	0.307718	2.47872	0.0131853	0.0270369	151.058	89.4423	120.25	72.7751	66.732	73.0009	70.836
DDB_G0271126	149.336	0.242718	0.392177	0.6189	0.535983	0.611491	229.191	99.965	164.578	141.469	140.582	135.473	139.175
DDB_G0271128	0.268638	1.11373	4.467	0.249324	0.80311	NA	0	0	0	0.453428	0.88976	0	0.447729
DDB_G0271130	5.0239	-1.3372	1.62553	-0.822621	0.410723	0.488847	5.2089	0	2.60445	6.80141	8.8976	4.21159	6.63687
DDB_G0271132	3.44368	3.94189	2.31069	1.70593	0.0880202	0.140583	15.6267	0	7.81334	0	0.88976	0.701931	0.530564
DDB_G0271134	51.8125	1.70824	0.754584	2.26382	0.0235855	0.0452523	145.849	31.5679	88.7085	18.5905	29.3621	33.6927	27.2151
DDB_G0271136	34.4087	-0.0305662	0.511877	-0.0597141	0.952383	0.964087	26.0445	42.0905	34.0675	37.1811	28.4723	38.2553	34.6362
DDB_G0271138	9.78591	0.77473	0.837345	0.925222	0.354851	0.432563	10.4178	15.7839	13.1009	8.61512	5.33856	8.77414	7.57594
DDB_G0271140	19.866	-0.199806	0.791828	-0.252335	0.800782	0.843983	20.8356	15.7839	18.3098	27.8858	12.0118	22.8128	20.9034
DDB_G0271142	75.6473	-1.0056	0.42951	-2.34127	0.0192181	0.0378127	26.0445	68.3971	47.2208	93.8595	86.7516	103.184	94.5983
DDB_G0271144	4299.58	1.0473	0.335776	3.11904	0.00181439	0.00459868	8073.79	4382.67	6228.23	2751.17	3220.04	3070.25	3013.82
DDB_G0271146	686.986	-0.563669	0.189435	-2.97552	0.00292491	0.00706148	588.605	478.78	533.692	726.164	784.323	857.058	789.182
DDB_G0271148	11159.2	3.49817	0.163679	21.3722	2.43e-101	4.54e-99	23054.6	26201.3	24628	1923.67	2255.99	2360.24	2179.97
DDB_G0271150	3.64601	3.23204	1.25391	2.57756	0.00994999	0.0210237	5.2089	10.5226	7.86576	0.906855	0.88976	0.701931	0.832849
DDB_G0271152	127.828	8.36036	1.18059	7.08154	1.43e-12	1.25e-11	546.934	89.4423	318.188	1.36028	0	1.40386	0.921382
DDB_G0271154	3.20213	6.07649	2.98724	2.03415	0.0419363	0.0743961	0	15.7839	7.89197	0.226714	0	0	0.0755713
DDB_G0271156	0.359323	0.683639	4.45176	0.153566	0.877952	NA	0	0	0	0.906855	0.88976	0	0.598872
DDB_G0271158	0.181371	1.62411	4.49189	0.361565	0.717677	NA	0	0	0	0.906855	0	0	0.302285
DDB_G0271160	1.04178	5.43537	4.56169	1.19152	0.233448	0.305271	5.2089	0	2.60445	0	0	0	0
DDB_G0271162	9.85433	3.06148	0.828149	3.69678	0.000218353	0.000674177	31.2534	10.5226	20.888	2.72057	2.66928	2.10579	2.49855
DDB_G0271164	1.27677	-1.12868	2.10575	-0.535998	0.59196	0.661709	0	0	0	0.906855	2.66928	2.80773	2.12795
DDB_G0271166	21.9347	0.175098	0.61691	0.28383	0.77654	0.822675	26.0445	21.0453	23.5449	18.8172	17.7952	25.9715	20.8613
DDB_G0271168	3.22651	5.38428	1.99618	2.6973	0.00699053	0.0153647	10.4178	5.26131	7.83955	0.453428	0	0	0.151143
DDB_G0271172	3.1463	7.02444	2.55196	2.75256	0.00591307	0.0132711	5.2089	10.5226	7.86576	0	0	0	0
DDB_G0271176	0.280773	1.0444	4.46423	0.23395	0.815024	NA	0	0	0	0	0	1.40386	0.467954
DDB_G0271178	1.05226	5.44259	4.56113	1.19325	0.23277	0.305271	0	5.26131	2.63066	0	0	0	0
DDB_G0271180	15.7383	7.68946	1.75539	4.38048	1.18e-05	4.61e-05	67.7156	10.5226	39.1191	0.453428	0	0	0.151143
DDB_G0271184	44.6269	3.56751	0.891344	4.00239	6.27e-05	0.000215419	171.894	26.3066	99.1001	11.3357	6.22832	7.37028	8.31143
DDB_G0271186	0	NA	NA	NA	NA	NA	0	0	0	0	0	0	0
DDB_G0271188	2.68273	2.44193	1.40748	1.73496	0.0827478	0.133358	5.2089	5.26131	5.23511	0.906855	1.33464	0.701931	0.981142
DDB_G0271190	0	NA	NA	NA	NA	NA	0	0	0	0	0	0	0
DDB_G0271192	13.5851	9.13578	1.6463	5.54928	2.87e-08	1.61e-07	46.8801	21.0453	33.9627	0	0	0	0
DDB_G0271194	2.39801	3.50769	1.84408	1.90214	0.0571534	0.0971749	0	10.5226	5.26131	0.226714	0.88976	0.350966	0.489146
DDB_G0271196	0	NA	NA	NA	NA	NA	0	0	0	0	0	0	0
DDB_G0271198	0.0701931	3.01237	4.55954	0.660674	0.508821	NA	0	0	0	0	0	0.350966	0.116989
DDB_G0271202	11.0622	-2.66627	1.49896	-1.77875	0.075281	0.123177	0	5.26131	2.63066	14.9631	18.2401	16.8464	16.6832
DDB_G0271204	48.4008	2.56509	0.495279	5.17909	2.23e-07	1.12e-06	130.222	63.1358	96.6791	19.9508	12.9015	15.7935	16.2153
DDB_G0271210	1.04178	5.43537	4.56169	1.19152	0.233448	0.305271	5.2089	0	2.60445	0	0	0	0
DDB_G0271212	0	NA	NA	NA	NA	NA	0	0	0	0	0	0	0
DDB_G0271214	9.50864	0.229877	0.862312	0.266582	0.789791	0.83455	10.4178	10.5226	10.4702	10.4288	8.45272	7.72125	8.8676
DDB_G0271216	3.46048	-0.637677	1.94272	-0.32824	0.74273	0.794328	5.2089	0	2.60445	7.48156	3.55904	1.0529	4.03116
DDB_G0271218	18.3716	-1.17794	0.811245	-1.45202	0.146497	0.215857	20.8356	0	10.4178	23.5782	23.5786	23.8657	23.6742
DDB_G0271220	0	NA	NA	NA	NA	NA	0	0	0	0	0	0	0
DDB_G0271222	6.71554	4.41938	1.51452	2.918	0.0035228	0.00837129	5.2089	26.3066	15.7577	1.36028	0	0.701931	0.687405
DDB_G0271224	2.29025	4.06136	2.247	1.80746	0.070691	0.116687	0	10.5226	5.26131	0.226714	0	0.701931	0.309548
DDB_G0271226	0.0906855	2.4812	4.544	0.546038	0.58504	NA	0	0	0	0.453428	0	0	0.151143
DDB_G0271228	2.10138	0.596215	1.73515	0.34361	0.73114	0.784059	0	5.26131	2.63066	1.36028	1.77952	2.10579	1.74853
DDB_G0271232	5.24035	7.76064	2.05764	3.77161	0.000162194	0.000514603	10.4178	15.7839	13.1009	0	0	0	0
DDB_G0271234	16.5024	1.80366	0.784277	2.29977	0.0214611	0.041713	20.8356	36.8292	28.8324	9.06855	11.5669	4.21159	8.28234
DDB_G0271236	97.3066	2.56822	0.557436	4.6072	4.08e-06	1.72e-05	93.7601	294.634	194.197	34.0071	31.1416	32.9908	32.7131
DDB_G0271238	40.1785	3.22243	0.503237	6.40341	1.52e-10	1.08e-09	52.089	121.01	86.5496	9.06855	8.8976	9.82704	9.2644
DDB_G0271240	137.845	-5.43318	1.03599	-5.24441	1.57e-07	8.03e-07	0	10.5226	5.26131	232.382	238.901	207.421	226.234
DDB_G0271242	541.346	-1.00462	0.170921	-5.87767	4.16e-09	2.58e-08	385.458	289.372	337.415	680.141	677.552	674.205	677.3
DDB_G0271244	4.46411	0.378706	1.68884	0.22424	0.822571	0.862008	10.4178	0	5.2089	6.80141	0.88976	4.21159	3.96759
DDB_G0271246	40.3613	1.15815	0.584293	1.98214	0.047464	0.0827887	26.0445	94.7037	60.3741	28.1125	28.0274	24.9186	27.0195
DDB_G0271248	86.3762	-0.617248	0.348273	-1.77231	0.0763434	0.124491	57.2979	73.6584	65.4781	106.555	102.767	91.602	100.308
DDB_G0271250	34.6929	-2.28187	0.762862	-2.9912	0.00277885	0.00673687	5.2089	15.7839	10.4964	53.2777	47.6022	51.592	50.824
DDB_G0271252	1.84138	-1.68301	1.8233	-0.923057	0.355978	0.4336	0	0	0	4.08085	2.66928	2.45676	3.06896
DDB_G0271254	19.8986	9.6858	1.39426	6.9469	3.73e-12	3.15e-11	46.8801	52.6131	49.7466	0	0	0	0
DDB_G0271256	0	NA	NA	NA	NA	NA	0	0	0	0	0	0	0
DDB_G0271260	0	NA	NA	NA	NA	NA	0	0	0	0	0	0	0
DDB_G0271264	804.994	1.40486	0.522404	2.68922	0.00716199	0.0156884	1911.66	657.664	1284.66	488.568	542.754	424.318	485.213
DDB_G0271266	0	NA	NA	NA	NA	NA	0	0	0	0	0	0	0
DDB_G0271268	44.1272	-0.738423	0.779396	-0.94743	0.34342	0.422594	5.2089	57.8745	31.5417	56.9052	51.1612	49.4862	52.5175
DDB_G0271270	144.836	0.999347	0.395528	2.52661	0.0115168	0.0239672	234.4	178.885	206.642	83.204	139.247	88.4434	103.632
DDB_G0271272	1364.78	-7.17174	0.597997	-11.9929	3.87e-33	1.36e-31	10.4178	21.0453	15.7315	2342.63	2245.75	2204.06	2264.15
DDB_G0271274	0	NA	NA	NA	NA	NA	0	0	0	0	0	0	0
DDB_G0271276	3.95078	0.767192	1.26257	0.607644	0.543424	0.617873	5.2089	5.26131	5.23511	3.17399	4.00392	2.10579	3.09457
DDB_G0271280	546.701	0.413942	0.362394	1.14224	0.253353	0.327575	849.05	436.689	642.87	513.053	512.502	422.212	482.589
DDB_G0271282	253.984	-1.62709	0.413733	-3.9327	8.4e-05	0.000282583	62.5067	163.101	112.804	369.543	356.794	317.975	348.104
DDB_G0271286	16.6609	-0.14144	0.735278	-0.192362	0.847459	0.882829	26.0445	5.26131	15.6529	17.6837	19.5747	14.7406	17.333
DDB_G0271288	98.0185	0.094797	0.297639	0.318496	0.750108	0.800357	104.178	99.965	102.071	104.062	88.5311	93.3569	95.3165
DDB_G0271290	169.496	1.91202	0.500031	3.8238	0.000131409	0.000427265	442.756	163.101	302.928	80.2567	89.4209	71.948	80.5418
DDB_G0271292	145.525	-3.8855	0.609227	-6.37774	1.8e-10	1.27e-09	20.8356	10.5226	15.6791	237.823	239.79	218.652	232.088
DDB_G0271294	40.4079	1.65014	1.0082	1.63673	0.101688	0.159278	10.4178	126.272	68.3447	21.0844	28.4723	15.7935	21.7834
DDB_G0271296	18.1973	0.0146391	0.673457	0.0217372	0.982658	0.98686	26.0445	10.5226	18.2836	16.5501	16.4606	21.4089	18.1399
DDB_G0271298	47774.6	3.09614	0.383565	8.07201	6.92e-16	8.15e-15	136348	66876.6	101612	10422.5	12678.2	12547.7	11882.8
DDB_G0271300	18.5558	-0.0370259	0.637978	-0.0580363	0.95372	0.965086	20.8356	15.7839	18.3098	19.9508	16.9054	19.3031	18.7198
DDB_G0271302	8.42492	6.87726	2.85431	2.40943	0.0159775	0.032112	41.6712	0	20.8356	0.453428	0	0	0.151143
DDB_G0271304	49.5862	-6.42207	1.52146	-4.22098	2.43e-05	8.96e-05	0	0	0	82.5238	108.551	56.8564	82.6437
DDB_G0271306	489.62	-3.97576	0.380068	-10.4607	1.31e-25	3.1e-24	41.6712	57.8745	49.7728	743.395	880.417	724.744	782.852
DDB_G0271308	19.2366	-0.835869	0.754547	-1.10778	0.267958	0.343762	5.2089	21.0453	13.1271	24.0317	19.5747	26.3224	23.3096
DDB_G0271310	58.2062	-0.600167	0.600736	-0.999052	0.317769	0.395661	67.7156	21.0453	44.3805	51.2373	65.3974	85.6356	67.4234
DDB_G0271312	20.1516	3.50836	0.878114	3.99533	6.46e-05	0.00022139	31.2534	57.8745	44.5639	3.62742	1.33464	6.66835	3.8768
DDB_G0271314	7.30294	8.24036	2.33942	3.5224	0.000427665	0.0012416	31.2534	5.26131	18.2573	0	0	0	0
DDB_G0271316	6.56754	-3.51138	1.54496	-2.2728	0.0230382	0.0443642	0	0	0	11.5624	9.34248	11.9328	10.9459
DDB_G0271318	0	NA	NA	NA	NA	NA	0	0	0	0	0	0	0
DDB_G0271320	0	NA	NA	NA	NA	NA	0	0	0	0	0	0	0
DDB_G0271322	1.05226	5.44259	4.56113	1.19325	0.23277	0.305271	0	5.26131	2.63066	0	0	0	0
DDB_G0271324	1.05226	5.44259	4.56113	1.19325	0.23277	0.305271	0	5.26131	2.63066	0	0	0	0
DDB_G0271326	0	NA	NA	NA	NA	NA	0	0	0	0	0	0	0
DDB_G0271328	0	NA	NA	NA	NA	NA	0	0	0	0	0	0	0
DDB_G0271330	1.04178	5.43537	4.56169	1.19152	0.233448	0.305271	5.2089	0	2.60445	0	0	0	0
DDB_G0271332	0	NA	NA	NA	NA	NA	0	0	0	0	0	0	0
DDB_G0271334	518.125	-0.785258	0.168539	-4.65921	3.17e-06	1.36e-05	312.534	410.383	361.458	629.358	617.493	620.858	622.57
DDB_G0271336	135.03	-1.86325	0.471016	-3.95581	7.63e-05	0.0002581	83.3423	21.0453	52.1938	191.573	200.196	178.992	190.254
DDB_G0271338	221.885	0.689268	0.413854	1.66549	0.0958157	0.151239	401.085	173.623	287.354	187.719	175.728	171.271	178.239
DDB_G0271340	130.246	4.08651	0.595232	6.86541	6.63e-12	5.46e-11	156.267	441.95	299.109	16.0967	23.5786	13.3367	17.6707
DDB_G0271342	306.74	0.000325943	0.398825	0.000817259	0.999348	0.99962	187.52	426.166	306.843	307.424	308.302	304.287	306.671
DDB_G0271344	2950.83	-1.00153	0.142087	-7.04871	1.81e-12	1.56e-11	1875.2	1809.89	1842.55	3371.46	3994.58	3703.04	3689.69
DDB_G0271346	107.564	2.15505	0.323181	6.66824	2.59e-11	2.02e-10	250.027	152.578	201.303	49.1969	40.0392	45.9765	45.0709
DDB_G0271348	22.1032	-2.6656	1.08357	-2.46	0.0138935	0.0282842	5.2089	5.26131	5.23511	29.4728	40.0392	30.534	33.3487
DDB_G0271350	22.0134	-0.419741	0.638422	-0.657467	0.510881	0.587441	15.6267	21.0453	18.336	26.9789	25.3582	21.0579	24.465
DDB_G0271352	0	NA	NA	NA	NA	NA	0	0	0	0	0	0	0
DDB_G0271354	3.24747	5.48142	3.05072	1.79676	0.0723735	0.119065	0	15.7839	7.89197	0.453428	0	0	0.151143
DDB_G0271356	41.0086	1.10704	0.925616	1.19601	0.231693	0.305271	10.4178	110.488	60.4527	29.9262	30.6967	23.5147	28.0459
DDB_G0271358	97.2237	-2.16585	0.476547	-4.54487	5.5e-06	2.27e-05	10.4178	52.6131	31.5155	143.963	146.81	132.314	141.029
DDB_G0271360	9.00086	-2.33594	1.53016	-1.5266	0.12686	0.191453	5.2089	0	2.60445	10.6555	13.3464	15.7935	13.2651
DDB_G0271362	0	NA	NA	NA	NA	NA	0	0	0	0	0	0	0
DDB_G0271364	0	NA	NA	NA	NA	NA	0	0	0	0	0	0	0
DDB_G0271366	0	NA	NA	NA	NA	NA	0	0	0	0	0	0	0
DDB_G0271368	0	NA	NA	NA	NA	NA	0	0	0	0	0	0	0
DDB_G0271370	6.01207	-3.38546	1.55244	-2.18073	0.0292031	0.054128	0	0	0	11.3357	8.8976	9.82704	10.0201
DDB_G0271372	2.16432	0.517711	2.03796	0.254034	0.799469	0.84276	5.2089	0	2.60445	0.906855	4.00392	0.701931	1.8709
DDB_G0271374	675.084	1.15198	0.622901	1.84938	0.0644031	0.107971	1578.3	436.689	1007.49	376.798	573.005	410.63	453.478
DDB_G0271376	593.133	2.72906	0.142263	19.1832	5.11e-82	7.23e-80	1281.39	1136.44	1208.92	172.983	184.625	190.223	182.61
DDB_G0271378	33.1131	-1.83017	0.703429	-2.60178	0.00927412	0.0197469	10.4178	15.7839	13.1009	51.2373	46.7124	41.414	46.4546
DDB_G0271380	0	NA	NA	NA	NA	NA	0	0	0	0	0	0	0
DDB_G0271384	81.6182	0.0598189	0.44695	0.133838	0.893531	0.918665	119.805	47.3518	83.5782	71.6416	78.7438	90.5491	80.3115
DDB_G0271386	1.91157	-1.73676	1.79496	-0.967577	0.333256	0.412293	0	0	0	4.08085	2.66928	2.80773	3.18595
DDB_G0271388	88.6614	-0.747892	0.65935	-1.13429	0.256674	0.331094	20.8356	105.226	63.0309	97.2602	96.0941	123.891	105.748
DDB_G0271390	0	NA	NA	NA	NA	NA	0	0	0	0	0	0	0
DDB_G0271392	2.08356	6.43089	4.44712	1.44608	0.148155	0.215857	10.4178	0	5.2089	0	0	0	0
DDB_G0271394	1.05226	5.44259	4.56113	1.19325	0.23277	0.305271	0	5.26131	2.63066	0	0	0	0
DDB_G0271396	66.1553	0.445288	0.346596	1.28475	0.198881	0.27795	78.1334	78.9197	78.5266	51.2373	63.173	59.3132	57.9078
DDB_G0271398	541.291	-0.815128	0.18011	-4.52573	6.02e-06	2.47e-05	312.534	431.428	371.981	652.029	648.19	662.272	654.164
DDB_G0271400	7.59815	-0.807611	1.33408	-0.60537	0.544933	0.619334	10.4178	0	5.2089	4.9877	8.8976	13.6877	9.19099
DDB_G0271402	471.492	1.19415	0.164884	7.24236	4.41e-13	4.05e-12	776.125	647.142	711.634	297.675	331.88	304.638	311.398
DDB_G0271404	17.9945	1.05185	0.828375	1.26978	0.204163	0.283751	46.8801	5.26131	26.0707	11.3357	12.4566	14.0386	12.6103
DDB_G0271406	3.47198	1.22479	1.41924	0.862991	0.388142	0.466345	0	10.5226	5.26131	1.36028	2.66928	2.80773	2.2791
DDB_G0271408	41.5094	0.169125	0.510557	0.331255	0.740452	0.792198	67.7156	21.0453	44.3805	37.6345	43.5982	37.5533	39.5954
DDB_G0271410	24.9211	2.95441	0.877452	3.36704	0.000759801	0.00208884	83.3423	21.0453	52.1938	8.1617	8.8976	3.15869	6.73933
DDB_G0271412	2.22991	-1.9524	1.70926	-1.14224	0.253352	0.327575	0	0	0	4.08085	3.55904	3.50966	3.71652
DDB_G0271414	0.713708	-0.312659	3.99226	-0.0783161	0.937577	0.95233	0	0	0	1.81371	0	1.75483	1.18951
DDB_G0271418	14.6164	9.24132	1.82138	5.07381	3.9e-07	1.89e-06	57.2979	15.7839	36.5409	0	0	0	0
DDB_G0271422	2.10453	6.44403	4.44606	1.44938	0.147232	0.215857	0	10.5226	5.26131	0	0	0	0
DDB_G0271424	0	NA	NA	NA	NA	NA	0	0	0	0	0	0	0
DDB_G0271426	0	NA	NA	NA	NA	NA	0	0	0	0	0	0	0
DDB_G0271428	6.2815	1.58972	1.21152	1.31217	0.189462	0.266309	0	21.0453	10.5226	4.53428	2.66928	3.15869	3.45408
DDB_G0271430	11.2067	-0.788951	0.989459	-0.797356	0.425244	0.502876	10.4178	5.26131	7.83955	17.2302	9.78736	13.3367	13.4514
DDB_G0271434	17.325	0.830639	0.640981	1.29589	0.195015	0.273134	15.6267	31.5679	23.5973	15.4165	10.6771	13.3367	13.1435
DDB_G0271438	0	NA	NA	NA	NA	NA	0	0	0	0	0	0	0
DDB_G0271440	5.21938	7.75583	2.37523	3.2653	0.00109347	0.00290837	20.8356	5.26131	13.0484	0	0	0	0
DDB_G0271444	0	NA	NA	NA	NA	NA	0	0	0	0	0	0	0
DDB_G0271446	0	NA	NA	NA	NA	NA	0	0	0	0	0	0	0
DDB_G0271448	0	NA	NA	NA	NA	NA	0	0	0	0	0	0	0
DDB_G0271450	0	NA	NA	NA	NA	NA	0	0	0	0	0	0	0
DDB_G0271452	0	NA	NA	NA	NA	NA	0	0	0	0	0	0	0
DDB_G0271454	4.1776	7.43461	2.42688	3.06345	0.00218802	0.00543347	15.6267	5.26131	10.444	0	0	0	0
DDB_G0271456	1.04178	5.43537	4.56169	1.19152	0.233448	0.305271	5.2089	0	2.60445	0	0	0	0
DDB_G0271458	0	NA	NA	NA	NA	NA	0	0	0	0	0	0	0
DDB_G0271460	3.1463	7.02444	2.55196	2.75256	0.00591307	0.0132711	5.2089	10.5226	7.86576	0	0	0	0
DDB_G0271462	0	NA	NA	NA	NA	NA	0	0	0	0	0	0	0
DDB_G0271466	0	NA	NA	NA	NA	NA	0	0	0	0	0	0	0
DDB_G0271468	2.08356	6.43089	4.44712	1.44608	0.148155	0.215857	10.4178	0	5.2089	0	0	0	0
DDB_G0271470	2.10453	6.44403	4.44606	1.44938	0.147232	0.215857	0	10.5226	5.26131	0	0	0	0
DDB_G0271472	24.0867	9.96138	1.35645	7.34372	2.08e-13	1.97e-12	57.2979	63.1358	60.2168	0	0	0	0
DDB_G0271474	0	NA	NA	NA	NA	NA	0	0	0	0	0	0	0
DDB_G0271476	13.5746	9.13466	1.80575	5.05866	4.22e-07	2.03e-06	52.089	15.7839	33.9364	0	0	0	0
DDB_G0271478	0	NA	NA	NA	NA	NA	0	0	0	0	0	0	0
DDB_G0271480	40.8391	10.7231	1.28595	8.33869	7.51e-17	9.72e-16	98.969	105.226	102.098	0	0	0	0
DDB_G0271482	3.15679	7.02918	4.40704	1.59499	0.110715	0.171207	0	15.7839	7.89197	0	0	0	0
DDB_G0271484	4.19857	7.44054	2.42914	3.06304	0.00219101	0.00543347	5.2089	15.7839	10.4964	0	0	0	0
DDB_G0271486	6.26116	8.01835	2.35072	3.41102	0.000647198	0.00181038	26.0445	5.26131	15.6529	0	0	0	0
[truncated: 11,408 more rows]

## Sheet: Up_Ka_genes
Gene_ID	baseMean	log2FoldChange	lfcSE	stat	pvalue	padj	KA_1	KA_2	KA_mean	AX4_veg_1	AX4_veg_2	AX4_veg_3	AX_mean	index
DDB_G0267178	75.6476	11.6124	1.69347	6.85716	7.02e-12	5.77e-11	57.2979	320.94	189.119	0	0	0	0	0
DDB_G0267180	72.4594	11.5502	1.57394	7.33842	2.16e-13	2.05e-12	72.9245	289.372	181.148	0	0	0	0	0
DDB_G0267182	184.643	12.8998	1.35804	9.49881	2.12e-21	3.85e-20	276.071	647.142	461.607	0	0	0	0	0
DDB_G0267184	113.225	12.1942	1.29204	9.43793	3.8e-21	6.76e-20	208.356	357.769	283.063	0	0	0	0	0
DDB_G0267188	88.0651	11.8316	1.30257	9.08326	1.05e-19	1.67e-18	161.476	278.85	220.163	0	0	0	0	0
DDB_G0267208	68.2189	11.4632	1.46357	7.83231	4.79e-15	5.23e-14	88.5512	252.543	170.547	0	0	0	0	0
DDB_G0267210	216.148	13.1271	1.37404	9.55367	1.25e-21	2.32e-20	307.325	773.413	540.369	0	0	0	0	0
DDB_G0267236	216.864	13.1318	1.2253	10.7173	8.44e-27	2.14e-25	474.01	610.312	542.161	0	0	0	0	0
DDB_G0267238	90.2744	11.8674	1.47564	8.04216	8.83e-16	1.04e-14	109.387	341.985	225.686	0	0	0	0	0
DDB_G0267240	283.696	13.5196	1.20485	11.2209	3.22e-29	9.42e-28	729.245	689.232	709.239	0	0	0	0	0
DDB_G0267242	73.4173	11.5691	1.35782	8.52032	1.59e-17	2.16e-16	119.805	247.282	183.543	0	0	0	0	0
DDB_G0267244	148.076	12.5814	1.53705	8.18541	2.71e-16	3.3e-15	145.849	594.529	370.189	0	0	0	0	0
DDB_G0267246	84.9188	11.7791	1.30276	9.04163	1.54e-19	2.42e-18	156.267	268.327	212.297	0	0	0	0	0
DDB_G0267258	226.67	13.1957	1.39175	9.48134	2.51e-21	4.51e-20	307.325	826.026	566.676	0	0	0	0	0
DDB_G0267260	51.4246	11.0554	1.48033	7.46822	8.13e-14	7.99e-13	67.7156	189.407	128.561	0	0	0	0	0
DDB_G0267262	87.9917	11.8304	1.24373	9.51204	1.87e-21	3.42e-20	197.938	242.02	219.979	0	0	0	0	0
DDB_G0267264	43.017	10.7978	1.451	7.44166	9.94e-14	9.7e-13	62.5067	152.578	107.542	0	0	0	0	0
DDB_G0267292	210.907	13.0917	1.37858	9.49651	2.17e-21	3.93e-20	296.907	757.629	527.268	0	0	0	0	0
DDB_G0267294	406.936	14.0399	1.30974	10.7196	8.23e-27	2.09e-25	666.739	1367.94	1017.34	0	0	0	0	0
DDB_G0267300	162.472	12.7152	1.26723	10.0338	1.08e-23	2.26e-22	312.534	499.825	406.179	0	0	0	0	0
DDB_G0267304	192.851	12.9625	1.25594	10.321	5.67e-25	1.3e-23	380.249	584.006	482.128	0	0	0	0	0
DDB_G0267306	335.784	13.7628	1.23665	11.1291	9.05e-29	2.6e-27	989.69	689.232	839.461	0	0	0	0	0
DDB_G0267308	88.1385	11.8328	1.40804	8.40372	4.33e-17	5.68e-16	125.013	315.679	220.346	0	0	0	0	0
DDB_G0267310	86.929	11.813	1.23862	9.53719	1.47e-21	2.7e-20	203.147	231.498	217.322	0	0	0	0	0
DDB_G0267314	40.9544	10.727	1.62994	6.5812	4.67e-11	3.51e-10	41.6712	163.101	102.386	0	0	0	0	0
DDB_G0267324	88.2014	11.8339	1.53468	7.71096	1.25e-14	1.31e-13	93.7601	347.247	220.503	0	0	0	0	0
DDB_G0267326	203.216	13.0381	1.21983	10.6884	1.15e-26	2.91e-25	458.383	557.699	508.041	0	0	0	0	0
DDB_G0267328	223.958	13.1785	1.21635	10.8344	2.36e-27	6.24e-26	609.441	510.348	559.894	0	0	0	0	0
DDB_G0267330	102.933	12.0567	1.59059	7.58004	3.45e-14	3.51e-13	93.7601	420.905	257.333	0	0	0	0	0
DDB_G0267342	251.495	13.3456	1.23721	10.7868	3.97e-27	1.03e-25	520.89	736.584	628.737	0	0	0	0	0
DDB_G0267354	51.1206	11.0473	1.75891	6.28079	3.37e-10	2.33e-09	218.774	36.8292	127.801	0	0	0	0	0
DDB_G0267356	1528.95	15.9497	1.24817	12.7784	2.16e-37	9.26e-36	4698.42	2946.34	3822.38	0	0	0	0	0
DDB_G0267358	927.709	15.2288	1.25434	12.1409	6.42e-34	2.3e-32	1760.61	2877.94	2319.27	0	0	0	0	0
DDB_G0267362	1174.02	15.5686	1.27952	12.1675	4.63e-34	1.69e-32	3812.91	2057.17	2935.04	0	0	0	0	0
DDB_G0267364	339.707	13.7794	1.2796	10.7685	4.85e-27	1.25e-25	609.441	1089.09	849.266	0	0	0	0	0
DDB_G0267624	311.421	13.6539	1.28803	10.6006	2.96e-26	7.23e-25	546.934	1010.17	778.553	0	0	0	0	0
DDB_G0267726	60.6433	11.2939	1.32421	8.5288	1.48e-17	2.01e-16	192.729	110.488	151.608	0	0	0	0	0
DDB_G0269070	316.054	13.6754	1.2117	11.2862	1.54e-29	4.58e-28	859.468	720.8	790.134	0	0	0	0	0
DDB_G0269852	82.6465	11.7404	1.26126	9.30851	1.3e-20	2.2e-19	239.609	173.623	206.616	0	0	0	0	0
DDB_G0270328	169.838	12.7792	1.28152	9.97191	2.02e-23	4.12e-22	312.534	536.654	424.594	0	0	0	0	0
DDB_G0270366	92.3056	11.8994	1.35973	8.75132	2.11e-18	3.05e-17	145.849	315.679	230.764	0	0	0	0	0
DDB_G0270368	79.7623	11.6887	1.45019	8.06015	7.62e-16	8.95e-15	104.178	294.634	199.406	0	0	0	0	0
DDB_G0270518	130.925	12.4038	1.22581	10.1188	4.56e-24	9.77e-23	302.116	352.508	327.312	0	0	0	0	0
DDB_G0270952	1542.13	15.962	1.26077	12.6605	9.78e-37	4.09e-35	2854.47	4856.19	3855.33	0	0	0	0	0
DDB_G0270954	804.818	15.0239	1.20352	12.4833	9.21e-36	3.59e-34	2172.11	1851.98	2012.05	0	0	0	0	0
DDB_G0270962	76.4483	11.6276	1.2426	9.35749	8.16e-21	1.41e-19	182.311	199.93	191.121	0	0	0	0	0
DDB_G0271480	40.8391	10.7231	1.28595	8.33869	7.51e-17	9.72e-16	98.969	105.226	102.098	0	0	0	0	0
DDB_G0271488	286.255	13.5325	1.36988	9.87862	5.15e-23	1.02e-21	1026.15	405.121	715.637	0	0	0	0	0
DDB_G0271490	622.035	14.6521	1.19839	12.2265	2.24e-34	8.36e-33	1494.95	1615.22	1555.09	0	0	0	0	0
DDB_G0271702	54.5709	11.1411	1.468	7.58929	3.22e-14	3.28e-13	72.9245	199.93	136.427	0	0	0	0	0
DDB_G0272554	510.942	14.3683	1.34774	10.661	1.55e-26	3.85e-25	750.081	1804.63	1277.36	0	0	0	0	0
DDB_G0272560	9986.65	18.6571	1.22837	15.1885	4.21e-52	3.02e-50	29466.7	20466.5	24966.6	0	0	0	0	0
DDB_G0272572	77.5949	11.6489	1.32735	8.77609	1.69e-18	2.46e-17	135.431	252.543	193.987	0	0	0	0	0
DDB_G0272578	145.478	12.5561	1.22256	10.2703	9.59e-25	2.16e-23	390.667	336.724	363.696	0	0	0	0	0
DDB_G0272586	74.155	11.584	1.46508	7.90676	2.64e-15	2.94e-14	276.071	94.7037	185.388	0	0	0	0	0
DDB_G0272600	139.091	12.4914	1.26983	9.83707	7.79e-23	1.53e-21	427.129	268.327	347.728	0	0	0	0	0
DDB_G0272604	58.5388	11.2429	1.35258	8.31224	9.39e-17	1.2e-15	192.729	99.965	146.347	0	0	0	0	0
DDB_G0272606	56.7174	11.1968	1.63864	6.833	8.32e-12	6.76e-11	52.089	231.498	141.793	0	0	0	0	0
DDB_G0272608	76.3015	11.6252	1.34986	8.61218	7.17e-18	9.92e-17	255.236	126.272	190.754	0	0	0	0	0
DDB_G0272612	113.942	12.2037	1.31984	9.24632	2.32e-20	3.86e-19	375.04	194.669	284.855	0	0	0	0	0
DDB_G0272614	62.9366	11.3469	1.38307	8.20413	2.32e-16	2.86e-15	98.969	215.714	157.341	0	0	0	0	0
DDB_G0272618	1487.95	15.9104	1.22464	12.9919	1.36e-38	6.28e-37	3109.71	4330.06	3719.89	0	0	0	0	0
DDB_G0272622	242.36	13.2922	1.36067	9.76886	1.53e-22	2.96e-21	354.205	857.594	605.9	0	0	0	0	0
DDB_G0272624	105.954	12.0984	1.36871	8.83931	9.63e-19	1.43e-17	161.476	368.292	264.884	0	0	0	0	0
DDB_G0272628	258.923	13.3876	1.26507	10.5825	3.59e-26	8.7e-25	489.636	804.981	647.309	0	0	0	0	0
DDB_G0272638	198.144	13.0016	1.2785	10.1694	2.72e-24	5.91e-23	364.623	626.096	495.36	0	0	0	0	0
DDB_G0272791	83.6568	11.758	1.29438	9.08385	1.05e-19	1.66e-18	260.445	157.839	209.142	0	0	0	0	0
DDB_G0272795	42.0171	10.7639	1.70207	6.32404	2.55e-10	1.78e-09	36.4623	173.623	105.043	0	0	0	0	0
DDB_G0272797	996.389	15.3318	1.30593	11.7402	7.93e-32	2.64e-30	1619.97	3361.98	2490.97	0	0	0	0	0
DDB_G0272799	307.321	13.635	1.30088	10.4814	1.05e-25	2.5e-24	1015.73	520.87	768.302	0	0	0	0	0
DDB_G0272801	411.023	14.0545	1.24903	11.2523	2.26e-29	6.69e-28	1250.13	804.981	1027.56	0	0	0	0	0
DDB_G0272807	130.621	12.4007	1.35896	9.12516	7.16e-20	1.15e-18	453.174	199.93	326.552	0	0	0	0	0
DDB_G0272875	83.6988	11.7587	1.2563	9.35974	7.99e-21	1.39e-19	239.609	178.885	209.247	0	0	0	0	0
DDB_G0272883	370.509	13.9048	1.20654	11.5245	9.93e-31	3.14e-29	989.69	862.856	926.273	0	0	0	0	0
DDB_G0272893	28020.5	20.1455	1.24472	16.1848	6.46e-59	5.36e-57	85858.2	54244.2	70051.2	0	0	0	0	0
DDB_G0273041	500.344	14.3381	1.38365	10.3625	3.67e-25	8.48e-24	1833.53	668.187	1250.86	0	0	0	0	0
DDB_G0273051	60.9369	11.3004	1.70918	6.61155	3.8e-11	2.9e-10	46.8801	257.804	152.342	0	0	0	0	0
DDB_G0273059	169.586	12.7772	1.21418	10.5234	6.74e-26	1.61e-24	437.547	410.383	423.965	0	0	0	0	0
DDB_G0273061	238.955	13.272	1.5925	8.33402	7.81e-17	1.01e-15	1000.11	194.669	597.388	0	0	0	0	0
DDB_G0273063	12797.4	19.0149	1.19022	15.976	1.88e-57	1.51e-55	32545.2	31441.6	31993.4	0	0	0	0	0
DDB_G0273065	11316.2	18.8374	1.22201	15.4152	1.29e-53	9.46e-52	32847.3	23733.8	28290.5	0	0	0	0	0
DDB_G0273067	6484.3	18.034	1.19007	15.1538	7.16e-52	5.03e-50	16079.9	16341.6	16210.8	0	0	0	0	0
DDB_G0273069	7945.05	18.3271	1.27738	14.3475	1.1e-46	6.77e-45	13886.9	25838.3	19862.6	0	0	0	0	0
DDB_G0273071	140.322	12.5039	1.21904	10.2571	1.1e-24	2.46e-23	338.578	363.031	350.804	0	0	0	0	0
DDB_G0273083	93.1796	11.9133	1.23164	9.67267	3.94e-22	7.5e-21	234.4	231.498	232.949	0	0	0	0	0
DDB_G0273093	116.371	12.2337	1.29226	9.46693	2.88e-21	5.16e-20	213.565	368.292	290.928	0	0	0	0	0
DDB_G0273095	55.4659	11.165	1.26709	8.81154	1.23e-18	1.83e-17	151.058	126.272	138.665	0	0	0	0	0
DDB_G0273097	1130.39	15.5139	1.5042	10.3138	6.11e-25	1.39e-23	4578.62	1073.31	2825.96	0	0	0	0	0
DDB_G0273101	273.362	13.4659	1.21023	11.1268	9.29e-29	2.66e-27	635.485	731.323	683.404	0	0	0	0	0
DDB_G0273105	587.944	14.5709	1.22598	11.8852	1.41e-32	4.83e-31	1703.31	1236.41	1469.86	0	0	0	0	0
DDB_G0273109	108.649	12.135	1.402	8.65551	4.91e-18	6.92e-17	390.667	152.578	271.623	0	0	0	0	0
DDB_G0273127	495.659	14.3246	1.26081	11.3614	6.51e-30	1.98e-28	1547.04	931.253	1239.15	0	0	0	0	0
DDB_G0273131	346.989	13.81	1.26423	10.9236	8.89e-28	2.4e-26	651.112	1083.83	867.471	0	0	0	0	0
DDB_G0273137	51.5294	11.0585	2.09494	5.27865	1.3e-07	6.73e-07	15.6267	242.02	128.824	0	0	0	0	0
DDB_G0273139	3760.73	17.2481	1.44414	11.9435	7.02e-33	2.43e-31	14668.3	4135.39	9401.82	0	0	0	0	0
DDB_G0273149	86.9604	11.8134	1.25286	9.42916	4.13e-21	7.32e-20	187.52	247.282	217.401	0	0	0	0	0
DDB_G0273157	53.6654	11.1171	3.62566	3.06621	0.00216788	0.0054016	0	268.327	134.164	0	0	0	0	0
DDB_G0273163	74.4591	11.5894	1.34518	8.61551	6.96e-18	9.66e-17	125.013	247.282	186.148	0	0	0	0	0
DDB_G0273175	503.014	14.3458	1.25474	11.4333	2.85e-30	8.81e-29	1552.25	962.821	1257.54	0	0	0	0	0
DDB_G0273185	46.1213	10.8984	1.32488	8.22589	1.94e-16	2.41e-15	88.5512	142.055	115.303	0	0	0	0	0
DDB_G0273191	7934.41	18.3252	1.46613	12.499	7.56e-36	2.97e-34	8193.59	31478.4	19836	0	0	0	0	0
DDB_G0273193	121.381	12.2949	1.23559	9.95063	2.51e-23	5.05e-22	338.578	268.327	303.453	0	0	0	0	0
DDB_G0273197	89.8551	11.8611	1.39339	8.51236	1.7e-17	2.31e-16	317.743	131.533	224.638	0	0	0	0	0
DDB_G0273207	84.7301	11.7764	1.26705	9.29434	1.48e-20	2.5e-19	250.027	173.623	211.825	0	0	0	0	0
DDB_G0273209	76.3539	11.6262	1.27929	9.088	1.01e-19	1.6e-18	229.191	152.578	190.885	0	0	0	0	0
DDB_G0273221	640.662	14.6948	1.19745	12.2717	1.29e-34	4.81e-33	1651.22	1552.09	1601.65	0	0	0	0	0
DDB_G0273223	44.9013	10.8603	1.55031	7.00523	2.47e-12	2.11e-11	171.894	52.6131	112.253	0	0	0	0	0
DDB_G0273231	52.2567	11.0792	1.38609	7.99313	1.32e-15	1.51e-14	177.102	84.181	130.642	0	0	0	0	0
DDB_G0273235	176.162	12.8319	1.29992	9.87129	5.54e-23	1.1e-21	307.325	573.483	440.404	0	0	0	0	0
DDB_G0273247	2977.66	16.9113	1.21643	13.9024	6.13e-44	3.42e-42	6396.52	8491.76	7444.14	0	0	0	0	0
DDB_G0273249	27820.7	20.1352	1.21857	16.5236	2.48e-61	2.17e-59	80024.3	59079.3	69551.8	0	0	0	0	0
DDB_G0273251	561.532	14.5046	1.26083	11.504	1.26e-30	3.97e-29	1755.4	1052.26	1403.83	0	0	0	0	0
DDB_G0273277	288.324	13.5428	1.27915	10.5874	3.41e-26	8.31e-25	520.89	920.73	720.81	0	0	0	0	0
DDB_G0273285	40.8391	10.7231	1.28595	8.33869	7.51e-17	9.72e-16	98.969	105.226	102.098	0	0	0	0	0
DDB_G0273289	53.5396	11.1136	1.53346	7.24738	4.25e-13	3.92e-12	62.5067	205.191	133.849	0	0	0	0	0
DDB_G0273291	92.1693	11.8974	1.23723	9.61619	6.83e-22	1.29e-20	213.565	247.282	230.423	0	0	0	0	0
DDB_G0273381	56.5287	11.1923	1.25939	8.88707	6.27e-19	9.47e-18	145.849	136.794	141.322	0	0	0	0	0
DDB_G0273389	53.3823	11.1097	1.26513	8.78147	1.61e-18	2.36e-17	140.64	126.272	133.456	0	0	0	0	0
DDB_G0273391	53.5606	11.1142	1.61878	6.86576	6.61e-12	5.45e-11	52.089	215.714	133.901	0	0	0	0	0
DDB_G0273397	429.488	14.1177	1.21205	11.6478	2.35e-31	7.64e-30	963.646	1183.8	1073.72	0	0	0	0	0
DDB_G0273399	216.33	13.1285	1.33266	9.85137	6.76e-23	1.34e-21	739.663	341.985	540.824	0	0	0	0	0
DDB_G0273421	137.217	12.4715	1.22656	10.1678	2.76e-24	6e-23	312.534	373.553	343.044	0	0	0	0	0
DDB_G0273425	65.7264	11.4099	1.72888	6.5996	4.12e-11	3.13e-10	281.28	47.3518	164.316	0	0	0	0	0
DDB_G0273433	47.0897	10.9289	1.28264	8.52059	1.59e-17	2.16e-16	130.222	105.226	117.724	0	0	0	0	0
DDB_G0273439	347.314	13.8113	1.36805	10.0956	5.78e-24	1.23e-22	489.636	1246.93	868.284	0	0	0	0	0
DDB_G0273443	130.956	12.4041	1.23546	10.04	1.02e-23	2.13e-22	286.489	368.292	327.391	0	0	0	0	0
DDB_G0273445	408.478	14.0455	1.36725	10.2728	9.34e-25	2.1e-23	1468.91	573.483	1021.2	0	0	0	0	0
DDB_G0273447	1224.2	15.629	1.27914	12.2183	2.48e-34	9.22e-33	3974.39	2146.62	3060.5	0	0	0	0	0
DDB_G0273449	112.9	12.1904	1.3166	9.25902	2.06e-20	3.45e-19	369.832	194.669	282.25	0	0	0	0	0
DDB_G0273451	687.223	14.7959	1.21239	12.2039	2.96e-34	1.09e-32	1521	1915.12	1718.06	0	0	0	0	0
DDB_G0273453	170.145	12.782	1.52884	8.36062	6.24e-17	8.12e-16	682.365	168.362	425.364	0	0	0	0	0
DDB_G0273465	45.0271	10.864	1.27683	8.50855	1.76e-17	2.38e-16	109.387	115.749	112.568	0	0	0	0	0
DDB_G0273471	231.628	13.2269	1.25191	10.5653	4.31e-26	1.04e-24	458.383	699.755	579.069	0	0	0	0	0
DDB_G0273473	92.3056	11.8994	1.35973	8.75132	2.11e-18	3.05e-17	145.849	315.679	230.764	0	0	0	0	0
DDB_G0273475	859.54	15.1188	1.25985	12.0004	3.54e-33	1.25e-31	2693	1604.7	2148.85	0	0	0	0	0
DDB_G0273483	245.15	13.3087	1.22324	10.8799	1.44e-27	3.86e-26	536.516	689.232	612.874	0	0	0	0	0
DDB_G0273485	54.3612	11.1361	1.34923	8.25367	1.54e-16	1.94e-15	177.102	94.7037	135.903	0	0	0	0	0
DDB_G0273761	45.9536	10.8937	1.51274	7.20131	5.96e-13	5.4e-12	171.894	57.8745	114.884	0	0	0	0	0
DDB_G0274285	6529.59	18.0441	1.29482	13.9356	3.85e-44	2.17e-42	21809.6	10838.3	16324	0	0	0	0	0
DDB_G0274459	260.546	13.3968	1.22115	10.9707	5.29e-28	1.44e-26	729.245	573.483	651.364	0	0	0	0	0
DDB_G0275023	2068.45	16.3856	1.52623	10.736	6.9e-27	1.76e-25	8511.34	1830.94	5171.14	0	0	0	0	0
DDB_G0275077	458.752	14.2128	1.20558	11.7892	4.44e-32	1.49e-30	1062.61	1231.15	1146.88	0	0	0	0	0
DDB_G0276245	106.953	12.1119	1.31207	9.23117	2.68e-20	4.41e-19	187.52	347.247	267.383	0	0	0	0	0
DDB_G0276969	952.066	15.2663	1.22028	12.5105	6.54e-36	2.6e-34	2729.46	2030.87	2380.16	0	0	0	0	0
DDB_G0277365	58.5703	11.2437	1.29754	8.66539	4.5e-18	6.38e-17	177.102	115.749	146.426	0	0	0	0	0
DDB_G0277521	44.9328	10.8614	1.42487	7.62267	2.48e-14	2.54e-13	156.267	68.3971	112.332	0	0	0	0	0
DDB_G0277595	252.918	13.3539	1.32469	10.0808	6.72e-24	1.43e-22	859.468	405.121	632.294	0	0	0	0	0
DDB_G0277829	41.8599	10.759	1.29097	8.33403	7.81e-17	1.01e-15	114.596	94.7037	104.65	0	0	0	0	0
DDB_G0280011	60.5071	11.2905	1.75302	6.44063	1.19e-10	8.6e-10	260.445	42.0905	151.268	0	0	0	0	0
DDB_G0281399	2063.61	16.3823	1.28108	12.7879	1.92e-37	8.23e-36	6735.1	3582.96	5159.03	0	0	0	0	0
DDB_G0281533	2401.36	16.601	1.24045	13.383	7.6e-41	3.85e-39	7271.62	4735.18	6003.4	0	0	0	0	0
DDB_G0281535	891.611	15.1716	1.20674	12.5724	2.99e-36	1.22e-34	2442.97	2015.08	2229.03	0	0	0	0	0
DDB_G0282775	88.6456	11.8414	1.81812	6.51297	7.37e-11	5.43e-10	395.876	47.3518	221.614	0	0	0	0	0
DDB_G0282893	64.7056	11.3873	1.63677	6.9572	3.47e-12	2.93e-11	265.654	57.8745	161.764	0	0	0	0	0
DDB_G0283083	138.798	12.4883	1.59038	7.85235	4.08e-15	4.48e-14	572.979	121.01	346.994	0	0	0	0	0
DDB_G0283085	340.235	13.7817	1.20224	11.4633	2.02e-30	6.3e-29	869.886	831.288	850.587	0	0	0	0	0
DDB_G0283125	48.2678	10.964	1.45621	7.52911	5.11e-14	5.11e-13	67.7156	173.623	120.67	0	0	0	0	0
DDB_G0284479	44.0168	10.831	1.31343	8.24632	1.63e-16	2.06e-15	88.5512	131.533	110.042	0	0	0	0	0
DDB_G0284793	293.382	13.5678	3.13621	4.32618	1.52e-05	5.81e-05	98.969	1367.94	733.455	0	0	0	0	0
DDB_G0284927	3993.95	17.3349	1.19818	14.4677	1.94e-47	1.21e-45	10673	9296.74	9984.88	0	0	0	0	0
DDB_G0285475	106.377	12.1044	1.79452	6.74522	1.53e-11	1.21e-10	474.01	57.8745	265.942	0	0	0	0	0
DDB_G0285587	48.1525	10.9609	1.27178	8.61856	6.78e-18	9.43e-17	125.013	115.749	120.381	0	0	0	0	0
DDB_G0285817	53.2041	11.105	1.77093	6.2707	3.59e-10	2.47e-09	229.191	36.8292	133.01	0	0	0	0	0
DDB_G0286957	60.549	11.2916	1.57409	7.17339	7.32e-13	6.57e-12	239.609	63.1358	151.372	0	0	0	0	0
DDB_G0287137	85.7823	11.7942	1.26165	9.34821	8.91e-21	1.54e-19	250.027	178.885	214.456	0	0	0	0	0
DDB_G0288079	84.9397	11.7794	1.32955	8.85975	8.02e-19	1.2e-17	145.849	278.85	212.349	0	0	0	0	0
DDB_G0288775	75.6791	11.613	1.82273	6.37119	1.88e-10	1.33e-09	41.6712	336.724	189.198	0	0	0	0	0
DDB_G0289005	22791.4	19.8475	1.21621	16.3191	7.21e-60	6.08e-58	65111.2	48846	56978.6	0	0	0	0	0
DDB_G0289399	103.933	12.0707	1.48912	8.1059	5.24e-16	6.25e-15	119.805	399.86	259.832	0	0	0	0	0
DDB_G0289487	319.539	13.6912	1.43704	9.5274	1.61e-21	2.96e-20	1218.88	378.815	798.848	0	0	0	0	0
DDB_G0289533	106.911	12.1114	1.27397	9.50677	1.97e-21	3.58e-20	208.356	326.201	267.279	0	0	0	0	0
DDB_G0290269	64.1146	11.3737	1.82897	6.21864	5.01e-10	3.4e-09	36.4623	284.111	160.287	0	0	0	0	0
DDB_G0290271	129.187	12.3845	1.56904	7.89306	2.95e-15	3.26e-14	119.805	526.131	322.968	0	0	0	0	0
DDB_G0290975	154.4	12.6417	1.56702	8.06735	7.18e-16	8.45e-15	140.64	631.358	385.999	0	0	0	0	0
DDB_G0291121	133.197	12.4286	1.33015	9.34375	9.3e-21	1.6e-19	218.774	447.212	332.993	0	0	0	0	0
DDB_G0291217	43.0484	10.7989	1.59074	6.78863	1.13e-11	9.1e-11	46.8801	168.362	107.621	0	0	0	0	0
DDB_G0291221	74.4486	11.5892	1.32861	8.72284	2.71e-18	3.89e-17	130.222	242.02	186.121	0	0	0	0	0
DDB_G0291223	79.6575	11.6868	1.28327	9.10706	8.46e-20	1.35e-18	156.267	242.02	199.144	0	0	0	0	0
DDB_G0292090	287.544	13.5389	1.39096	9.73344	2.17e-22	4.18e-21	385.458	1052.26	718.861	0	0	0	0	0
DDB_G0293318	42.7234	10.7884	2.42609	4.44681	8.72e-06	3.47e-05	208.356	5.26131	106.809	0	0	0	0	0
DDB_G0293382	717.642	14.8585	1.3741	10.8132	2.98e-27	7.82e-26	2614.87	973.343	1794.1	0	0	0	0	0
DDB_G0293410	2354.63	16.5726	1.42721	11.6119	3.59e-31	1.15e-29	9053.06	2720.1	5886.58	0	0	0	0	0
DDB_G0294094	149.866	12.5987	1.25401	10.0467	9.5e-24	2e-22	302.116	447.212	374.664	0	0	0	0	0
DDB_G0294096	199.714	13.0132	1.27762	10.1855	2.3e-24	5.05e-23	630.276	368.292	499.284	0	0	0	0	0
DDB_G0294144	201.091	13.0229	1.21457	10.7222	8e-27	2.04e-25	468.801	536.654	502.727	0	0	0	0	0
DDB_G0294146	95.3261	11.946	1.2412	9.62448	6.3e-22	1.19e-20	213.565	263.066	238.315	0	0	0	0	0
DDB_G0294180	157.41	12.6696	1.40197	9.03699	1.61e-19	2.52e-18	213.565	573.483	393.524	0	0	0	0	0
DDB_G0294230	40.8705	10.724	1.31686	8.1436	3.84e-16	4.62e-15	83.3423	121.01	102.176	0	0	0	0	0
DDB_G0294248	49.3096	10.9948	1.42965	7.69053	1.47e-14	1.53e-13	72.9245	173.623	123.274	0	0	0	0	0
DDB_G0294256	158.812	12.6826	1.37241	9.24115	2.44e-20	4.04e-19	562.561	231.498	397.029	0	0	0	0	0
DDB_G0294270	40.7237	10.7194	1.56563	6.84672	7.56e-12	6.18e-11	156.267	47.3518	101.809	0	0	0	0	0
DDB_G0294280	58.8324	11.2496	1.69781	6.62598	3.45e-11	2.64e-10	46.8801	247.282	147.081	0	0	0	0	0
DDB_G0294320	93.3998	11.9165	1.43012	8.33247	7.92e-17	1.02e-15	125.013	341.985	233.499	0	0	0	0	0
DDB_G0294324	50.4352	11.0274	1.75916	6.2686	3.64e-10	2.51e-09	36.4623	215.714	126.088	0	0	0	0	0
DDB_G0294344	73.4068	11.5689	1.34009	8.63291	5.98e-18	8.36e-17	125.013	242.02	183.517	0	0	0	0	0
DDB_G0294346	98.5353	11.9937	1.28483	9.33484	1.01e-20	1.73e-19	187.52	305.156	246.338	0	0	0	0	0
DDB_G0294358	419.966	14.0854	1.20365	11.7022	1.24e-31	4.09e-30	989.69	1110.14	1049.91	0	0	0	0	0
DDB_G0294411	56.7907	11.1987	2.11273	5.30059	1.15e-07	6e-07	15.6267	268.327	141.977	0	0	0	0	0
DDB_G0294605	425.577	14.1047	1.26626	11.1389	8.11e-29	2.34e-27	1338.69	789.197	1063.94	0	0	0	0	0
DDB_G0294637	286.027	13.5312	3.15346	4.2909	1.78e-05	6.72e-05	93.7601	1336.37	715.067	0	0	0	0	0
DDB_G0295491	54.6548	11.1434	1.84713	6.03282	1.61e-09	1.05e-08	31.2534	242.02	136.637	0	0	0	0	0
DDB_G0295505	2581.48	16.7051	3.10145	5.38624	7.19e-08	3.83e-07	906.348	12001.1	6453.7	0	0	0	0	0
DDB_G0295549	158.839	12.6826	3.54465	3.57794	0.000346309	0.0010256	26.0445	768.152	397.098	0	0	0	0	0
DDB_G0295559	426.352	14.1071	1.21285	11.6314	2.85e-31	9.24e-30	953.228	1178.53	1065.88	0	0	0	0	0
DDB_G0295615	147.275	12.5735	3.6209	3.47248	0.000515668	0.00147651	20.8356	715.539	368.187	0	0	0	0	0
DDB_G0295641	1390.65	15.8127	3.53303	4.47567	7.62e-06	3.07e-05	218.774	6734.48	3476.63	0	0	0	0	0
DDB_G0295643	223185	23.1392	1.22424	18.9008	1.12e-79	1.49e-77	463810	652114	557962	0	0	0	0	0
DDB_G0295645	84702.5	21.7414	1.51622	14.3392	1.24e-46	7.55e-45	76039.5	347473	211756	0	0	0	0	0
DDB_G0295647	72971.5	21.5264	1.19868	17.9584	4.13e-72	4.56e-70	168758	196100	182429	0	0	0	0	0
DDB_G0295649	39087.9	20.6257	1.19919	17.1997	2.67e-66	2.75e-64	90181.6	105258	97719.7	0	0	0	0	0
DDB_G0295651	36359.5	20.5213	1.51693	13.5282	1.07e-41	5.52e-40	32592.1	149206	90898.8	0	0	0	0	0
DDB_G0295653	99584.6	21.9749	1.20823	18.1877	6.46e-74	7.43e-72	220368	277555	248961	0	0	0	0	0
DDB_G0295655	925.813	15.2257	3.75803	4.0515	5.09e-05	0.000177254	88.5512	4540.51	2314.53	0	0	0	0	0
DDB_G0295661	45.0062	10.8635	1.27994	8.48749	2.11e-17	2.84e-16	119.805	105.226	112.515	0	0	0	0	0
DDB_G0295833	50.1941	11.0211	1.32423	8.32262	8.6e-17	1.1e-15	156.267	94.7037	125.485	0	0	0	0	0
DDB_G0305706	155.127	12.6485	1.26415	10.0055	1.44e-23	2.97e-22	302.116	473.518	387.817	0	0	0	0	0
DDB_G0305708	42.0276	10.7643	1.77242	6.07323	1.25e-09	8.2e-09	31.2534	178.885	105.069	0	0	0	0	0
DDB_G0305714	762.214	14.9454	1.2695	11.7726	5.4e-32	1.81e-30	2427.35	1383.73	1905.54	0	0	0	0	0
DDB_G0274137	9636.76	17.6425	1.30516	13.5175	1.23e-41	6.36e-40	33425.5	14758	24091.7	0	0	0.350966	0.116989	4.85594e-06
DDB_G0288879	12833.3	17.2161	1.0918	15.7685	5.12e-56	3.98e-54	39827.2	24338.8	32083	0.226714	0.44488	0	0.223865	6.97762e-06
DDB_G0305150	525963	16.8446	0.774391	21.7521	6.6e-105	1.3e-102	2.05944e+06	570348	1.31489e+06	10.2021	18.2401	5.26449	11.2356	8.54478e-06
DDB_G0272248	6995.36	15.2644	1.0844	14.0764	5.3e-45	3.03e-43	23705.7	11269.7	17487.7	0	0	1.40386	0.467954	2.67583e-05
DDB_G0267366	1420.13	14.8809	1.22562	12.1415	6.36e-34	2.29e-32	2859.68	4240.62	3550.15	0	0	0.350966	0.116989	3.2952e-05
DDB_G0294413	14338.6	14.2608	0.84426	16.8915	5.2e-64	4.99e-62	41645.1	30042.1	35843.6	2.04042	3.55904	0	1.86649	5.20704e-05
DDB_G0274129	3115.77	13.0035	0.563684	23.0687	9.54e-118	2.45e-115	7063.26	8512.81	7788.03	0.680141	0	2.10579	0.928645	0.000119226
DDB_G0294034	1.68135e+06	12.8896	0.425933	30.262	3.63e-201	3.34e-198	5.58248e+06	2.82261e+06	4.20255e+06	614.848	641.962	404.663	553.824	0.000131766
DDB_G0277833	1076.62	12.9715	1.03666	12.5128	6.35e-36	2.53e-34	1614.76	3767.1	2690.93	0	0.88976	0.350966	0.413575	0.000153669
DDB_G0274727	5305.47	12.4003	0.601047	20.6312	1.44e-94	2.37e-92	17439.4	9081.03	13260.2	3.85413	1.33464	1.75483	2.31453	0.000174517
DDB_G0280545	2038.32	12.5292	0.674906	18.5644	6.24e-77	7.65e-75	6505.91	3682.92	5094.42	0.453428	0.88976	1.40386	0.915683	0.00017971
DDB_G0274135	4914.28	12.3385	0.556484	22.1721	6.38e-109	1.44e-106	15772.5	8791.66	12282.1	1.587	1.77952	3.86062	2.40905	0.000196104
DDB_G0295557	153.047	11.6678	1.23847	9.42114	4.46e-21	7.89e-20	312.534	452.473	382.503	0.226714	0	0	0.0755713	0.000197531
DDB_G0285043	1506.77	12.3238	0.812011	15.1769	5.03e-52	3.56e-50	2349.21	5182.39	3765.8	0.906855	1.33464	0	0.747165	0.000198369
DDB_G0292084	292.947	12.6011	1.39552	9.0297	1.72e-19	2.68e-18	359.414	1104.88	732.145	0	0.44488	0	0.148293	0.000202505
DDB_G0289811	8093.68	12.171	0.56532	21.5295	8.25e-103	1.6e-100	28154.1	12301	20227.5	2.94728	4.4488	5.96642	4.45417	0.000220155
DDB_G0268744	305.099	11.8172	1.23733	9.55058	1.29e-21	2.38e-20	1140.75	384.076	762.412	0.226714	0.44488	0	0.223865	0.000293541
DDB_G0283585	298.064	11.7622	1.15198	10.2104	1.78e-24	3.93e-23	979.272	510.348	744.81	0	0	0.701931	0.233977	0.000314045
DDB_G0295767	11710.4	11.3956	0.490479	23.2335	2.09e-119	6.06e-117	38946.9	19572.1	29259.5	7.02813	13.3464	12.6348	11.0031	0.000375911
DDB_G0269256	76.2839	10.6651	1.42456	7.48655	7.07e-14	6.99e-13	286.489	94.7037	190.596	0.226714	0	0	0.0755713	0.000396342
DDB_G0284931	2168.42	11.1914	0.366504	30.5356	8.77e-205	8.8e-202	5557.89	5277.1	5417.5	2.49385	3.55904	1.0529	2.3686	0.000437021
DDB_G0294012	6344.21	10.9926	0.421333	26.09	4.73e-150	2.01e-147	13235.8	18462	15848.9	9.29527	9.78736	4.21159	7.76474	0.000489684
DDB_G0295493	3879.26	11.0097	0.512141	21.4973	1.65e-102	3.14e-100	7407.05	11974.8	9690.9	2.49385	5.33856	6.66835	4.83359	0.000498527
DDB_G0269234	12087.8	10.8176	0.362839	29.8139	2.58e-195	1.9e-192	37217.6	23170.8	30194.2	13.6028	21.3542	15.7935	16.9168	0.000559954
DDB_G0295621	238.827	10.871	0.892048	12.1865	3.67e-34	1.34e-32	645.903	547.177	596.54	0	0	1.0529	0.350966	0.00058799
DDB_G0274561	5537.07	10.7593	0.40018	26.8862	3.18e-159	1.4e-156	15996.5	11664.3	13830.4	4.9877	9.34248	10.178	8.1694	0.000590334
DDB_G0294018	158.298	10.8662	1.06337	10.2187	1.64e-24	3.62e-23	364.623	426.166	395.395	0	0	0.701931	0.233977	0.000591406
DDB_G0289813	48.3131	10.0047	1.40442	7.12372	1.05e-12	9.25e-12	67.7156	173.623	120.67	0.226714	0	0	0.0755713	0.000625874
DDB_G0275119	338.458	10.4789	1.03011	10.1726	2.63e-24	5.74e-23	343.787	1346.9	845.342	0.906855	0	0.701931	0.536262	0.000633971
DDB_G0295593	1179.95	10.4739	0.95112	11.0122	3.34e-28	9.19e-27	1453.28	4440.55	2946.92	4.30756	0.88976	0.701931	1.96642	0.000666835
DDB_G0290563	83.9345	10.7982	1.2633	8.54766	1.26e-17	1.72e-16	166.685	252.543	209.614	0	0.44488	0	0.148293	0.000706959
DDB_G0275121	149.943	10.2222	0.893729	11.4377	2.71e-30	8.43e-29	343.787	405.121	374.454	0.453428	0	0.350966	0.268131	0.000715546
DDB_G0283153	382.897	10.436	1.46325	7.13206	9.89e-13	8.72e-12	1317.85	594.529	956.19	0	0	2.10579	0.701931	0.000733554
DDB_G0290691	75.3609	9.84961	1.1877	8.29298	1.1e-16	1.41e-15	244.818	131.533	188.175	0.453428	0	0	0.151143	0.000802555
DDB_G0288745	786.353	10.1258	1.35952	7.44804	9.47e-14	9.27e-13	3500.38	426.166	1963.27	1.36028	0	3.86062	1.7403	0.000885644
DDB_G0280543	5682.63	10.0334	0.444059	22.5948	4.88e-113	1.15e-110	19507.3	8865.31	14186.3	14.283	12.9015	13.3367	13.5071	0.000951213
DDB_G0294016	17118.2	9.96133	0.428883	23.2262	2.47e-119	7e-117	57735.4	27727.1	42731.3	45.5695	49.3817	33.6927	42.8813	0.0010025
DDB_G0295701	93.341	10.1013	1.07759	9.37394	6.99e-21	1.22e-19	223.983	242.02	233.001	0	0	0.701931	0.233977	0.00100318
DDB_G0267206	92.5823	10.0263	1.50102	6.67969	2.39e-11	1.87e-10	78.1334	384.076	231.105	0	0	0.701931	0.233977	0.00101141
DDB_G0272520	17429	9.73146	0.322876	30.1399	1.45e-199	1.15e-196	54766.3	32225.6	43495.9	57.1319	47.6022	48.4333	51.0558	0.00117243
DDB_G0284925	2030.82	9.67991	0.352957	27.4252	1.37e-165	7.23e-163	4448.4	5687.48	5067.94	7.70827	6.6732	3.86062	6.0807	0.0011984
DDB_G0281439	105.896	9.70334	0.903814	10.736	6.9e-27	1.76e-25	291.698	236.759	264.229	0.226714	0.44488	0.350966	0.340853	0.00128833
DDB_G0274601	6935.59	9.55731	0.37276	25.6393	5.57e-145	2.19e-142	21919	12690.3	17304.7	23.8049	17.7952	27.0244	22.8748	0.00132014
DDB_G0289283	98.6262	9.20969	0.803062	11.4682	1.91e-30	5.98e-29	244.818	247.282	246.05	0.680141	0	0.350966	0.343702	0.00139493
DDB_G0292578	43.1286	9.08754	1.38814	6.54657	5.89e-11	4.39e-10	52.089	163.101	107.595	0.453428	0	0	0.151143	0.00140277
DDB_G0283353	241.488	9.4173	1.76104	5.34758	8.91e-08	4.7e-07	5.2089	1199.58	602.394	0.453428	0.44488	1.75483	0.884379	0.00146595
DDB_G0268332	92.2812	9.12052	0.830283	10.9848	4.52e-28	1.24e-26	260.445	199.93	230.187	0.680141	0	0.350966	0.343702	0.00149092
DDB_G0276759	708.398	9.336	0.768645	12.146	6.02e-34	2.17e-32	2771.13	762.891	1767.01	4.08085	1.77952	2.10579	2.65539	0.0015005
DDB_G0291137	77.7029	8.91005	0.893334	9.97393	1.98e-23	4.04e-22	171.894	215.714	193.804	0.906855	0	0	0.302285	0.00155732
DDB_G0294078	70.3546	9.67038	1.10594	8.74407	2.25e-18	3.24e-17	161.476	189.407	175.442	0	0.88976	0	0.296587	0.00168766
DDB_G0289553	1291.01	9.09158	0.668428	13.6014	3.93e-42	2.07e-40	4974.5	1462.65	3218.57	4.30756	8.00784	5.61545	5.97695	0.00185358
DDB_G0290243	50.4603	9.19161	1.19201	7.71104	1.25e-14	1.31e-13	93.7601	157.839	125.8	0	0	0.701931	0.233977	0.00185646
DDB_G0269518	2643.96	9.05067	0.527276	17.165	4.86e-66	4.96e-64	3865	9317.79	6591.39	14.5097	8.45272	14.0386	12.3337	0.00186768
DDB_G0270314	65.2688	9.00613	1.16742	7.71453	1.21e-14	1.28e-13	78.1334	247.282	162.708	0.226714	0	0.701931	0.309548	0.00189887
DDB_G0285179	361.184	8.93368	0.565466	15.7988	3.17e-56	2.5e-54	911.557	889.162	900.359	2.04042	0	3.15869	1.73304	0.00192113
DDB_G0284315	142.566	8.81717	0.817342	10.7876	3.94e-27	1.03e-25	474.01	236.759	355.384	1.36028	0	0.701931	0.687405	0.00193052
DDB_G0280533	4437.5	9.00258	0.333084	27.028	6.93e-161	3.19e-158	13704.6	8418.1	11061.4	19.4974	20.0196	25.2695	21.5955	0.00194853
DDB_G0295727	58.8531	9.39705	1.14304	8.22109	2.02e-16	2.5e-15	125.013	168.362	146.688	0	0.88976	0	0.296587	0.00201781
DDB_G0287659	88.1275	8.64359	1.10313	7.83549	4.67e-15	5.11e-14	265.654	173.623	219.639	1.36028	0	0	0.453428	0.00206017
DDB_G0270126	45.3143	8.98595	1.58497	5.66948	1.43e-08	8.29e-08	36.4623	189.407	112.935	0	0	0.701931	0.233977	0.00206751
DDB_G0277201	612.411	8.88762	0.805248	11.0371	2.53e-28	7.02e-27	2526.31	526.131	1526.22	3.17399	2.2244	4.21159	3.20333	0.00209446
DDB_G0289663	14437.1	8.82841	0.343511	25.7005	1.15e-145	4.72e-143	46046.6	25901.5	35974	73.2286	72.9603	91.2511	79.1467	0.00219527
DDB_G0268754	96.4651	8.62495	1.30948	6.58655	4.5e-11	3.39e-10	328.16	152.578	240.369	1.587	0	0	0.528999	0.00219594
DDB_G0277083	179.912	8.66043	0.91653	9.44916	3.42e-21	6.09e-20	307.325	589.267	448.296	2.26714	0	0.701931	0.98969	0.00220281
DDB_G0292996	61.8699	8.40715	1.25596	6.6938	2.17e-11	1.71e-10	218.774	89.4423	154.108	1.13357	0	0	0.377856	0.0024459
DDB_G0271770	119.912	8.83174	0.80091	11.0271	2.83e-28	7.82e-27	244.818	352.508	298.663	0.453428	1.77952	0	0.744316	0.00248596
DDB_G0274481	96.5297	8.5699	0.884237	9.69186	3.27e-22	6.26e-21	322.952	157.839	240.395	0.453428	0	1.40386	0.619097	0.00256871
DDB_G0271152	127.828	8.36036	1.18059	7.08154	1.43e-12	1.25e-11	546.934	89.4423	318.188	1.36028	0	1.40386	0.921382	0.00288735
DDB_G0292814	40.9366	8.08527	1.21903	6.63256	3.3e-11	2.54e-10	140.64	63.1358	101.888	0.906855	0	0	0.302285	0.00295806
DDB_G0269136	41245.5	8.26133	0.129885	63.6051	0	0	105579	99644	102612	303.796	342.113	358.687	334.865	0.00325281
DDB_G0274599	13961	8.21797	0.277476	29.6168	9.07e-193	6.26e-190	38629.2	30826	34727.6	112.45	92.535	144.598	116.528	0.00334425
DDB_G0295531	171.379	8.10809	1.47607	5.49301	3.95e-08	2.17e-07	10.4178	841.81	426.114	1.13357	1.77952	1.75483	1.55597	0.00363825
DDB_G0269210	75.6931	7.895	0.806208	9.79277	1.21e-22	2.36e-21	239.609	136.794	188.202	1.36028	0	0.701931	0.687405	0.0036392
DDB_G0272340	112.261	8.13127	2.00687	4.05172	5.08e-05	0.000177196	474.01	84.181	279.095	0	3.11416	0	1.03805	0.00370557
DDB_G0268346	115.745	8.07685	0.599948	13.4626	2.6e-41	1.33e-39	338.578	236.759	287.669	0.906855	1.77952	0.701931	1.12944	0.00391081
DDB_G0294090	14038.3	7.95667	0.718877	11.0682	1.79e-28	5.08e-27	58568.8	11201.3	34885.1	133.534	151.259	136.526	140.44	0.00400964
DDB_G0268622	148.298	7.89949	0.916789	8.61648	6.9e-18	9.59e-17	484.427	252.543	368.485	1.36028	0	3.15869	1.50632	0.00407124
DDB_G0274133	1536.31	7.92262	0.361828	21.8961	2.83e-106	5.89e-104	3109.71	4524.73	3817.22	14.0563	12.0118	21.0579	15.7087	0.00409834
DDB_G0276433	119.692	7.84615	0.969211	8.09541	5.71e-16	6.77e-15	505.263	89.4423	297.353	1.81371	0.88976	1.0529	1.25212	0.00419324
DDB_G0270212	58.0424	7.69129	0.848581	9.0637	1.26e-19	1.98e-18	98.969	189.407	144.188	1.13357	0	0.701931	0.611833	0.00422537
DDB_G0305545	42.3398	7.83093	1.98541	3.94425	8.01e-05	0.000270135	15.6267	194.669	105.148	0	0	1.40386	0.467954	0.00443073
DDB_G0349475	114.559	7.79785	0.839065	9.29349	1.49e-20	2.52e-19	453.174	115.749	284.461	1.13357	1.33464	1.40386	1.29069	0.00451682
DDB_G0293242	67.5344	7.66215	0.717342	10.6813	1.24e-26	3.12e-25	135.431	199.93	167.681	0.906855	0	1.40386	0.770239	0.00457249
DDB_G0281611	919.925	7.73811	0.334439	23.1376	1.94e-118	5.22e-116	2036.68	2530.69	2283.69	8.61512	8.8976	14.7406	10.7511	0.00468572
DDB_G0270012	3507.47	7.66909	0.204763	37.4534	5.28e-307	1.46e-303	7896.69	9512.46	8704.57	40.8085	38.2597	49.1352	42.7345	0.00488544
DDB_G0280865	60.3732	7.7279	1.51222	5.11028	3.22e-07	1.58e-06	26.0445	273.588	149.816	0.453428	1.77952	0	0.744316	0.00494363
DDB_G0293610	55.6896	7.54452	1.33	5.67255	1.41e-08	8.16e-08	244.818	31.5679	138.193	1.36028	0	0.701931	0.687405	0.00494962
DDB_G0280817	127.682	7.63617	0.513656	14.8663	5.45e-50	3.63e-48	302.116	331.463	316.789	1.13357	0.88976	2.80773	1.61035	0.00505764
DDB_G0294567	46.292	7.55604	1.13297	6.66921	2.57e-11	2.01e-10	182.311	47.3518	114.832	0.906855	0.88976	0	0.598872	0.00518816
DDB_G0275227	299.563	7.64465	0.491246	15.5617	1.32e-54	1.02e-52	812.588	673.448	743.018	2.04042	6.22832	3.50966	3.92613	0.00525626
DDB_G0277489	102.566	7.47399	0.665739	11.2266	3.02e-29	8.88e-28	161.476	347.247	254.361	1.81371	0.88976	1.40386	1.36911	0.00535373
DDB_G0279741	55.6923	7.60225	1.62597	4.67552	2.93e-06	1.27e-05	260.445	15.7839	138.114	0.453428	1.77952	0	0.744316	0.00536024
DDB_G0284619	330.758	7.51173	0.520958	14.4191	3.92e-47	2.43e-45	630.276	1010.17	820.224	5.89456	5.33856	2.10579	4.4463	0.00539161
DDB_G0272030	3568.12	7.50341	0.49545	15.1446	8.22e-52	5.71e-50	12501.3	5192.92	8847.13	40.8085	42.7085	62.8229	48.7799	0.00548341
DDB_G0270726	2909.51	7.50075	0.261187	28.7179	2.28e-181	1.4e-178	6698.64	7728.87	7213.76	38.9948	49.8266	31.2359	40.0191	0.005517
DDB_G0291970	693.127	7.45246	0.58061	12.8356	1.04e-37	4.52e-36	979.272	2457.03	1718.15	12.2425	11.122	5.96642	9.77699	0.00565821
DDB_G0279667	30385.9	7.42908	0.203902	36.4346	1.21e-290	2.22e-287	81357.7	69259.9	75308.8	370.224	447.104	494.511	437.28	0.00577296
DDB_G0289883	100.498	7.39621	0.593932	12.453	1.35e-35	5.2e-34	177.102	320.94	249.021	1.36028	1.33464	1.75483	1.48325	0.00592105
DDB_G0285769	176.606	7.41101	0.969893	7.64105	2.15e-14	2.21e-13	343.787	531.393	437.59	0.453428	1.77952	5.61545	2.61613	0.00594297
DDB_G0277183	1549.29	7.38892	0.411542	17.9542	4.45e-72	4.86e-70	5104.72	2572.78	3838.75	19.044	23.5786	26.3224	22.9817	0.00595113
DDB_G0277169	97.4234	7.33955	0.66458	11.0439	2.35e-28	6.57e-27	145.849	336.724	241.287	1.36028	1.77952	1.40386	1.51456	0.00623784
DDB_G0269270	63.4287	7.36037	0.630672	11.6707	1.8e-31	5.9e-30	156.267	157.839	157.053	0.906855	1.77952	0.350966	1.01245	0.00640523
DDB_G0291826	161.533	7.30579	0.572079	12.7706	2.39e-37	1.02e-35	520.89	278.85	399.87	1.81371	4.00392	2.10579	2.64114	0.00656167
DDB_G0275497	202.33	7.20196	0.896672	8.03187	9.6e-16	1.12e-14	854.259	147.317	500.788	4.08085	1.77952	4.21159	3.35732	0.00665943
DDB_G0279995	102.458	7.21254	0.582252	12.3873	3.06e-35	1.17e-33	328.16	178.885	253.523	1.36028	1.77952	2.10579	1.74853	0.00684971
DDB_G0289205	748.478	7.12215	0.421469	16.8984	4.62e-64	4.48e-62	1692.89	2009.82	1851.36	12.0158	8.00784	19.6541	13.2259	0.00709323
DDB_G0283925	867.903	7.12829	0.307288	23.1974	4.83e-119	1.33e-116	2599.24	1694.14	2146.69	14.5097	15.1259	16.4954	15.377	0.00711217
DDB_G0292136	3386.49	7.11365	1.0453	6.80535	1.01e-11	8.15e-11	15788.2	962.821	8375.49	59.8524	68.9564	52.6449	60.4846	0.00716984
DDB_G0294030	1000.38	7.12099	0.193915	36.7222	3.23e-295	7.14e-292	2375.26	2572.78	2474.02	17.2302	20.4645	16.1444	17.9464	0.0072017
DDB_G0277781	465.455	7.11902	0.544996	13.0625	5.39e-39	2.55e-37	765.708	1536.3	1151.01	4.76099	10.6771	9.82704	8.42172	0.00726369
DDB_G0269766	91.9085	7.03907	0.668183	10.5347	5.98e-26	1.44e-24	317.743	136.794	227.268	2.26714	1.33464	1.40386	1.66855	0.00728824
DDB_G0292014	97.4021	7.13997	0.485465	14.7075	5.77e-49	3.79e-47	244.818	236.759	240.789	1.36028	2.66928	1.40386	1.81114	0.00746555
DDB_G0285615	385.505	6.99628	0.723844	9.66545	4.23e-22	8.02e-21	437.547	1467.91	952.727	11.5624	4.89368	5.61545	7.35718	0.00766306
DDB_G0274391	50.7757	6.9202	0.918929	7.53073	5.05e-14	5.05e-13	166.685	84.181	125.433	0.906855	0	2.10579	1.00422	0.00794242
DDB_G0292808	1418.92	6.91597	0.598915	11.5475	7.6e-31	2.42e-29	4792.18	2215.01	3503.6	24.7118	45.8226	16.8464	29.1269	0.00824489
DDB_G0270140	53.1965	6.90782	0.96571	7.1531	8.48e-13	7.56e-12	46.8801	215.714	131.297	0.906855	1.77952	0.701931	1.12944	0.00852878
DDB_G0274037	144.652	6.84395	0.732378	9.34482	9.2e-21	1.58e-19	156.267	557.699	356.983	3.62742	3.55904	2.10579	3.09742	0.00860202
DDB_G0269050	443.725	6.85388	0.49259	13.914	5.21e-44	2.92e-42	921.975	1267.98	1094.98	9.52198	14.2362	4.91352	9.55722	0.00865273
DDB_G0295785	72.8875	6.85017	1.14842	5.96487	2.45e-09	1.56e-08	333.369	26.3066	179.838	1.13357	2.2244	1.40386	1.58728	0.00874893
DDB_G0273775	627.871	6.64292	0.846699	7.84567	4.31e-15	4.72e-14	2698.21	394.599	1546.4	11.109	18.2401	17.1973	15.5155	0.00993359
DDB_G0269520	906.319	6.60545	0.633382	10.4288	1.83e-25	4.27e-24	927.183	3535.6	2231.39	20.4042	23.1338	25.2695	22.9358	0.0101741
DDB_G0292028	1986.16	6.58946	0.718075	9.17656	4.45e-20	7.21e-19	8084.21	1694.14	4889.17	43.9825	64.9525	43.5197	50.8182	0.0102871
DDB_G0294088	22226.9	6.58161	0.188077	34.9942	2.76e-268	4.35e-265	47942.7	61478.5	54710.6	584.241	519.62	609.276	571.046	0.0103298
DDB_G0270350	56.4734	6.56436	0.714965	9.18136	4.26e-20	6.92e-19	83.3423	194.669	139.005	1.36028	0.88976	2.10579	1.45195	0.0103373
DDB_G0287863	45.6933	6.58038	0.654601	10.0525	8.96e-24	1.89e-22	140.64	84.181	112.411	0.906855	1.33464	1.40386	1.21512	0.0106941
DDB_G0276863	2179.1	6.52446	0.286428	22.7787	7.46e-115	1.83e-112	6453.82	4266.93	5360.37	53.9579	53.3856	67.3854	58.243	0.0107487
DDB_G0280279	976.943	6.4929	0.230155	28.211	4.29e-175	2.37e-172	2411.72	2393.9	2402.81	29.2461	20.0196	29.8321	26.3659	0.0108539
DDB_G0290753	44.662	6.54957	0.630551	10.3871	2.84e-25	6.59e-24	130.222	89.4423	109.832	0.906855	1.33464	1.40386	1.21512	0.0109423
DDB_G0294014	128.087	6.50575	0.706041	9.2144	3.13e-20	5.12e-19	140.64	489.302	314.971	2.72057	3.55904	4.21159	3.49706	0.0109809
DDB_G0275915	286.223	6.46542	1.05989	6.10009	1.06e-09	7.01e-09	1317.85	89.4423	703.646	9.52198	6.22832	8.07221	7.94084	0.0111593
DDB_G0271672	60.5105	6.45243	0.861103	7.49322	6.72e-14	6.65e-13	244.818	52.6131	148.716	1.587	1.77952	1.75483	1.70711	0.0113488
DDB_G0282131	160.221	6.44533	0.945763	6.81495	9.43e-12	7.65e-11	692.783	94.7037	393.743	2.94728	4.00392	6.66835	4.53985	0.0113985
DDB_G0271722	41.4616	6.48272	0.896474	7.23134	4.78e-13	4.37e-12	151.058	52.6131	101.836	0.453428	1.77952	1.40386	1.21227	0.0117641
DDB_G0278833	785.982	6.3857	0.752503	8.48595	2.14e-17	2.88e-16	3245.14	615.574	1930.36	23.5782	18.2401	27.3753	23.0645	0.0118072
DDB_G0274117	54.3513	6.46679	0.566264	11.4201	3.32e-30	1.02e-28	135.431	131.533	133.482	0.906855	1.77952	2.10579	1.59739	0.0118256
DDB_G0290261	1426.04	6.3327	0.385704	16.4185	1.41e-60	1.21e-58	4479.65	2520.17	3499.91	36.5009	39.1494	54.7506	43.467	0.0122671
DDB_G0274895	126.163	6.30858	0.622722	10.1307	4.04e-24	8.67e-23	161.476	457.734	309.605	4.53428	3.55904	3.50966	3.86766	0.0123381
DDB_G0288281	832.01	6.32125	0.588025	10.75	5.93e-27	1.53e-25	3094.08	989.127	2041.61	19.7241	31.1416	25.9715	25.6124	0.0123898
DDB_G0288221	144.123	6.36741	0.450601	14.1309	2.45e-45	1.42e-43	296.907	410.383	353.645	2.72057	5.33856	5.26449	4.4412	0.0124026
DDB_G0279185	3668.28	6.2989	0.137518	45.8042	0	0	9365.59	8633.82	8999.71	116.984	103.212	121.785	113.994	0.012508
DDB_G0289511	105.699	6.36503	0.574382	11.0815	1.54e-28	4.39e-27	229.191	289.372	259.282	2.04042	5.78344	2.10579	3.30989	0.0126047
DDB_G0288817	57.789	6.15212	0.979498	6.28089	3.37e-10	2.33e-09	83.3423	199.93	141.636	4.08085	0.88976	0.701931	1.89085	0.0131742
DDB_G0293276	82.1755	6.20094	0.687373	9.02122	1.86e-19	2.89e-18	234.4	168.362	201.381	3.85413	3.55904	0.701931	2.70504	0.0132544
DDB_G0280721	111.106	6.23592	0.372127	16.7575	4.99e-63	4.59e-61	276.071	268.327	272.199	3.17399	4.4488	3.50966	3.71082	0.0134494
DDB_G0284759	114.252	6.13202	0.439848	13.9412	3.56e-44	2.01e-42	322.952	236.759	279.855	4.76099	2.2244	4.56255	3.84931	0.013568
DDB_G0281853	81.1668	6.17426	0.48203	12.8089	1.46e-37	6.36e-36	239.609	157.839	198.724	2.72057	3.55904	2.10579	2.79513	0.0138703
DDB_G0276065	554.453	6.14784	0.446125	13.7805	3.34e-43	1.82e-41	1041.78	1673.1	1357.44	22.6714	23.1338	11.5819	19.129	0.0138962
DDB_G0290265	383.403	6.14877	0.410978	14.9613	1.31e-50	8.79e-49	651.112	1225.89	938.499	11.109	15.5708	13.3367	13.3388	0.0140138
DDB_G0270008	2740.96	6.1161	0.269897	22.6608	1.09e-113	2.62e-111	5432.88	7981.41	6707.15	92.9527	111.22	86.3376	96.8367	0.0142324
DDB_G0290091	326.285	6.10843	0.728641	8.38332	5.15e-17	6.71e-16	270.863	1325.85	798.357	11.5624	11.5669	11.5819	11.5704	0.0142857
DDB_G0283609	108.333	6.09464	0.605336	10.0682	7.64e-24	1.62e-22	145.849	384.076	264.963	3.17399	4.00392	4.56255	3.91349	0.014555
DDB_G0275439	705.032	6.04327	0.537456	11.2442	2.47e-29	7.3e-28	2552.36	894.423	1723.39	24.7118	23.1338	30.534	26.1265	0.0149336
DDB_G0273887	5942.49	6.03508	0.294206	20.5131	1.65e-93	2.63e-91	17804	11243.4	14523.7	194.294	251.357	219.354	221.668	0.0150331
DDB_G0294092	4115.57	6.02457	0.34273	17.5782	3.62e-69	3.81e-67	13058.7	7055.42	10057.1	144.19	168.61	150.915	154.572	0.0151368
DDB_G0278163	2035.65	6.02013	0.479317	12.5598	3.51e-36	1.42e-34	6875.74	3072.61	4974.17	67.7874	61.3934	100.727	76.636	0.015173
DDB_G0269740	1149.58	5.99132	0.733028	8.17339	3e-16	3.64e-15	1963.75	3651.35	2807.55	30.3796	82.7477	19.6541	44.2605	0.0155201
DDB_G0302511	2343.99	5.98122	1.07809	5.54798	2.89e-08	1.62e-07	572.979	10875.1	5724.06	86.1512	83.1926	102.482	90.6086	0.0155828
DDB_G0275745	88.7005	5.9727	0.816474	7.31523	2.57e-13	2.42e-12	359.414	73.6584	216.536	3.17399	4.4488	2.80773	3.47684	0.0158029
DDB_G0269458	1898.26	5.95657	0.385461	15.4531	7.19e-54	5.4e-52	6000.65	3267.28	4633.96	92.2725	64.0627	67.0344	74.4566	0.0158135
DDB_G0293674	230.07	5.96812	0.751259	7.94416	1.96e-15	2.21e-14	807.379	315.679	561.529	5.21442	16.4606	5.61545	9.09681	0.0159418
DDB_G0281545	190.639	5.92135	0.468558	12.6374	1.31e-36	5.45e-35	599.023	331.463	465.243	9.97541	7.11808	5.61545	7.56965	0.0160098
DDB_G0292436	61.0307	5.86546	0.788015	7.44333	9.82e-14	9.59e-13	203.147	94.7037	148.925	4.30756	0.88976	2.10579	2.43437	0.0160834
DDB_G0287717	4939.37	5.93204	0.525066	11.2977	1.35e-29	4.03e-28	17512.3	6592.43	12052.4	189.533	153.039	249.537	197.369	0.0161121
DDB_G0271914	69.8067	5.87475	0.482089	12.186	3.69e-34	1.35e-32	140.64	199.93	170.285	3.17399	1.77952	3.50966	2.82106	0.0162967
DDB_G0285215	296	5.91511	0.259004	22.8379	1.93e-115	4.84e-113	796.961	647.142	722.051	12.4693	12.9015	10.529	11.9666	0.0163028
DDB_G0291592	65.4807	5.8261	0.728448	7.99796	1.27e-15	1.46e-14	151.058	168.362	159.71	4.9877	0.88976	2.10579	2.66109	0.0163889
DDB_G0274131	1030.37	5.87124	0.789905	7.43284	1.06e-13	1.04e-12	4328.59	694.494	2511.54	36.0475	43.5982	49.1352	42.927	0.0168047
DDB_G0291842	948.676	5.8599	0.451608	12.9756	1.68e-38	7.67e-37	3224.31	1399.51	2311.91	38.9948	45.8226	34.7456	39.8543	0.0169466
DDB_G0270480	83.751	5.89197	0.42939	13.7217	7.53e-43	4.03e-41	229.191	178.885	204.038	2.72057	4.4488	3.50966	3.55967	0.017147
DDB_G0269134	107980	5.81362	0.202908	28.6515	1.53e-180	8.92e-178	289464	236412	262938	3985.4	5043.16	4997.4	4675.32	0.0174705
DDB_G0274141	982.289	5.80208	0.378988	15.3094	6.62e-53	4.81e-51	3120.13	1662.58	2391.35	37.1811	41.3738	50.1881	42.9143	0.0176293
DDB_G0286509	23095.1	5.78916	0.510814	11.3332	8.99e-30	2.72e-28	29096.9	83328.7	56212.8	913.657	1089.51	1046.58	1016.58	0.0177633
DDB_G0272752	47.4706	5.74185	0.758901	7.566	3.85e-14	3.89e-13	52.089	178.885	115.487	2.49385	1.77952	2.10579	2.12639	0.0180795
DDB_G0283345	264.754	5.70447	0.295974	19.2736	8.96e-83	1.3e-80	724.036	562.961	643.499	12.2425	9.78736	14.7406	12.2568	0.0186911
DDB_G0292096	2640.62	5.71322	0.453137	12.6082	1.9e-36	7.81e-35	5391.21	7444.76	6417.98	85.4711	97.4287	184.257	122.386	0.0187123
DDB_G0288233	88.3742	5.6552	0.507469	11.1439	7.66e-29	2.21e-27	192.729	236.759	214.744	4.9877	1.77952	5.61545	4.12756	0.0188583
DDB_G0285975	289.176	5.67004	0.336194	16.8654	8.09e-64	7.63e-62	572.979	831.288	702.133	13.8295	16.9054	10.8799	13.8716	0.0193737
DDB_G0272494	234.624	5.66983	0.48306	11.7373	8.2e-32	2.72e-30	765.708	373.553	569.63	8.1617	12.0118	13.6877	11.287	0.0194297
DDB_G0273919	6410.98	5.62768	0.195693	28.7578	7.24e-182	4.7e-179	15605.9	15505.1	15555.5	286.34	283.833	373.778	314.65	0.0198266
DDB_G0289073	2233.12	5.62346	0.632741	8.88746	6.25e-19	9.45e-18	8615.51	2220.27	5417.89	92.0458	112.11	125.646	109.934	0.0198873
DDB_G0275177	103.715	5.61999	0.759273	7.4018	1.34e-13	1.3e-12	182.311	320.94	251.626	6.80141	7.11808	1.40386	5.10779	0.0198953
DDB_G0277895	1554.55	5.61933	0.185834	30.2385	7.39e-201	6.28e-198	3995.22	3546.13	3770.67	66.6539	85.417	79.3182	77.1297	0.0200451
DDB_G0283449	122.066	5.62413	0.353304	15.9186	4.7e-57	3.76e-55	260.445	331.463	295.954	4.9877	7.11808	6.31738	6.14106	0.0203282
DDB_G0274935	305.288	5.58513	0.602755	9.266	1.93e-20	3.24e-19	343.787	1136.44	740.116	14.9631	13.3464	17.8992	15.4029	0.0203872
DDB_G0280473	91.8162	5.54589	0.377294	14.6991	6.53e-49	4.27e-47	203.147	242.02	222.584	5.44113	3.55904	4.91352	4.6379	0.0204113
DDB_G0287671	549.855	5.55163	0.260849	21.283	1.63e-100	3e-98	1432.45	1231.15	1331.8	23.3515	27.5826	34.7456	28.5599	0.0209944
DDB_G0280211	477.041	5.5269	0.687802	8.0356	9.31e-16	1.09e-14	494.845	1815.15	1155	18.5905	20.4645	36.1495	25.0682	0.021243
DDB_G0279721	1346.16	5.51449	0.230262	23.9488	9.52e-127	3.18e-124	3812.91	2704.32	3258.61	75.0423	69.4013	69.1402	71.1946	0.021381
DDB_G0287491	101.833	5.48553	0.531513	10.3206	5.69e-25	1.3e-23	161.476	331.463	246.469	6.34799	3.55904	6.31738	5.40814	0.0214713
DDB_G0286229	2839.39	5.49698	0.434199	12.6601	9.84e-37	4.1e-35	9084.31	4656.26	6870.29	132.401	123.232	200.752	152.128	0.0216632
DDB_G0285981	348.796	5.4947	0.378849	14.5037	1.15e-47	7.29e-46	677.156	1010.17	843.664	16.5501	25.3582	14.7406	18.8829	0.0218921
DDB_G0289507	79.0097	5.53194	0.439235	12.5945	2.26e-36	9.25e-35	192.729	189.407	191.068	3.17399	6.22832	3.50966	4.30399	0.0220297
DDB_G0288001	2126.82	5.46604	0.806352	6.77872	1.21e-11	9.7e-11	8959.3	1325.85	5142.58	135.121	108.551	105.29	116.321	0.0221188
DDB_G0270086	47.6123	5.42684	0.626309	8.66481	4.52e-18	6.4e-17	125.013	105.226	115.12	2.72057	0.88976	4.21159	2.6073	0.022147
DDB_G0293148	82.0099	5.47408	0.946273	5.78489	7.26e-09	4.36e-08	338.578	57.8745	198.226	2.26714	7.11808	4.21159	4.53227	0.022353
DDB_G0280375	593.212	5.4288	0.415747	13.0579	5.73e-39	2.69e-37	1119.91	1746.76	1433.33	36.2742	21.3542	41.7649	33.1311	0.0225925
DDB_G0290259	381.867	5.42466	0.405442	13.3796	7.96e-41	4.01e-39	661.53	1183.8	922.663	26.9789	19.1298	17.8992	21.336	0.0226017
DDB_G0287995	3642.03	5.42867	0.545201	9.95718	2.35e-23	4.76e-22	4375.47	13221.7	8798.58	169.128	212.208	231.637	204.325	0.0226954
DDB_G0287695	136.643	5.40711	0.867697	6.23156	4.62e-10	3.15e-09	307.325	352.508	329.916	9.52198	12.4566	1.40386	7.79416	0.0230794
DDB_G0267990	77.884	5.3673	0.690877	7.76882	7.92e-15	8.46e-14	270.863	105.226	188.044	6.80141	2.66928	3.86062	4.44377	0.0230859
DDB_G0268968	988.209	5.39536	0.623416	8.65451	4.95e-18	6.97e-17	3750.4	1020.7	2385.55	58.4922	45.8226	65.6306	56.6485	0.0231957
DDB_G0267398	114.059	5.34382	0.409321	13.0553	5.92e-39	2.77e-37	213.565	336.724	275.144	8.1617	6.22832	5.61545	6.66849	0.0236628
DDB_G0284823	336.619	5.36152	0.943709	5.68133	1.34e-08	7.78e-08	171.894	1452.12	812.008	28.1125	12.0118	18.9521	19.6921	0.023677
DDB_G0292188	2387.31	5.35804	0.377551	14.1916	1.03e-45	6.07e-44	7495.6	4019.64	5757.62	143.963	163.271	114.064	140.433	0.02381
DDB_G0277993	915.614	5.33959	0.287368	18.581	4.58e-77	5.74e-75	1995.01	2420.2	2207.61	58.9456	40.0392	63.8758	54.2868	0.0240006
DDB_G0293366	731.832	5.31426	0.196251	27.0789	1.74e-161	8.36e-159	1880.41	1646.79	1763.6	48.5168	37.8148	45.6255	43.9857	0.0243339
DDB_G0289489	88.8887	5.2848	0.668809	7.9018	2.75e-15	3.05e-14	328.16	99.965	214.063	6.34799	4.00392	5.96642	5.43944	0.0247808
DDB_G0290247	488.354	5.29796	0.837183	6.32832	2.48e-10	1.74e-09	2067.93	284.111	1176.02	26.2988	31.1416	32.2888	29.9097	0.0248022
DDB_G0282033	1036.07	5.28222	0.361015	14.6316	1.77e-48	1.15e-46	3036.79	1951.95	2494.37	77.5361	46.7124	67.3854	63.878	0.0249695
DDB_G0274971	96.9976	5.2947	0.576996	9.17632	4.46e-20	7.22e-19	135.431	331.463	233.447	4.30756	7.11808	6.66835	6.03133	0.0251853
DDB_G0281481	62.9596	5.26385	0.599292	8.78345	1.59e-18	2.32e-17	213.565	89.4423	151.504	4.53428	4.4488	2.80773	3.93027	0.0252858
DDB_G0274525	517.643	5.24697	0.631067	8.31444	9.22e-17	1.18e-15	1958.54	531.393	1244.97	33.3269	26.6928	38.2553	32.7583	0.025638
DDB_G0268446	88.1115	5.20494	0.415202	12.5359	4.75e-36	1.91e-34	239.609	184.146	211.878	6.5747	3.55904	6.66835	5.6007	0.0257529
DDB_G0273701	1641.45	5.1857	0.251852	20.5903	3.35e-94	5.44e-92	4578.62	3304.11	3941.36	109.049	92.9799	122.487	108.172	0.0267122
DDB_G0269482	650.918	5.16993	0.450173	11.4843	1.58e-30	4.97e-29	2166.9	957.559	1562.23	48.0633	46.2675	35.7985	43.3764	0.0270156
DDB_G0292194	226.56	5.15107	0.500203	10.298	7.2e-25	1.63e-23	765.708	320.94	543.324	12.4693	18.2401	15.4425	15.3839	0.0275349
DDB_G0272562	764.101	5.13299	1.07748	4.76388	1.9e-06	8.4e-06	3463.92	199.93	1831.92	39.4482	49.8266	67.3854	52.2201	0.0277156
DDB_G0293492	2568.01	5.12994	0.2966	17.2958	5.06e-67	5.27e-65	4594.25	7718.35	6156.3	170.262	170.834	186.363	175.82	0.0277663
DDB_G0292952	223.617	5.10071	0.460989	11.0647	1.86e-28	5.27e-27	729.245	341.985	535.615	16.7768	17.7952	12.2838	15.6186	0.0283339
DDB_G0294661	91.05	5.08871	0.864672	5.88513	3.98e-09	2.47e-08	57.2979	378.815	218.056	7.48156	5.33856	6.31738	6.37917	0.0284232
DDB_G0272196	1552.23	5.07752	0.389158	13.0474	6.57e-39	3.06e-37	5031.79	2399.16	3715.48	105.422	112.11	112.66	110.064	0.0287708
DDB_G0274237	2269.53	5.0734	0.296376	17.1181	1.09e-65	1.1e-63	4307.76	6555.6	5431.68	136.482	159.712	188.118	161.437	0.0288635
DDB_G0287629	441.73	5.07028	1.16064	4.36851	1.25e-05	4.85e-05	78.1334	2036.13	1057.13	33.5536	33.8109	27.0244	31.463	0.0289024
DDB_G0268660	133.678	5.0797	0.47883	10.6086	2.72e-26	6.65e-25	218.774	420.905	319.839	6.80141	10.6771	11.2309	9.56981	0.0290514
DDB_G0280979	84.3958	4.99738	0.465553	10.7343	7.03e-27	1.79e-25	166.685	236.759	201.722	7.25484	3.55904	7.72125	6.17838	0.029718
DDB_G0282631	85.9166	4.98171	1.16241	4.28565	1.82e-05	6.88e-05	36.4623	373.553	205.008	5.89456	11.5669	2.10579	6.52241	0.0308344
DDB_G0289505	42.8664	5.00487	0.580972	8.61465	7.02e-18	9.72e-17	72.9245	131.533	102.229	2.26714	4.4488	3.15869	3.29154	0.0311935
DDB_G0294515	1757.61	4.93381	0.726091	6.79503	1.08e-11	8.73e-11	1479.33	6897.58	4188.45	109.729	114.334	187.065	137.043	0.0316825
DDB_G0282209	3252.24	4.91719	0.102157	48.1335	0	0	7969.61	7523.68	7746.64	268.429	251.357	248.133	255.973	0.0319862
DDB_G0295497	43.0327	4.92006	1.02128	4.81753	1.45e-06	6.52e-06	20.8356	184.146	102.491	3.62742	4.4488	2.10579	3.394	0.0320538
DDB_G0269406	249.363	4.9194	0.235903	20.8535	1.42e-96	2.48e-94	656.321	531.393	593.857	19.4974	21.3542	18.2502	19.7006	0.0321088
DDB_G0272436	86.4695	4.91319	1.12596	4.36356	1.28e-05	4.94e-05	380.249	31.5679	205.909	7.93498	9.78736	2.80773	6.84336	0.0321659
DDB_G0282365	313.648	4.90911	0.552727	8.88163	6.59e-19	9.94e-18	1093.87	399.86	746.864	23.3515	19.5747	31.5869	24.8377	0.0321856
DDB_G0277127	103.049	4.91574	0.679313	7.23635	4.61e-13	4.22e-12	385.458	105.226	245.342	6.34799	9.78736	8.42318	8.18617	0.032289
DDB_G0290143	103.549	4.91503	0.532777	9.2253	2.83e-20	4.65e-19	151.058	341.985	246.522	7.70827	10.6771	6.31738	8.23426	0.0323221
DDB_G0279211	165.806	4.87494	0.524074	9.30202	1.38e-20	2.33e-19	567.77	220.975	394.372	12.9227	11.5669	15.7935	13.4277	0.0329271
DDB_G0271696	99.0705	4.83544	0.330911	14.6125	2.34e-48	1.51e-46	265.654	205.191	235.422	8.61512	7.11808	8.77414	8.16912	0.0335361
DDB_G0278119	113.425	4.76942	0.721097	6.61413	3.74e-11	2.85e-10	437.547	99.965	268.756	9.97541	11.5669	8.07221	9.8715	0.035429
DDB_G0269700	186.856	4.75297	0.240792	19.7389	9.99e-87	1.53e-84	416.712	468.257	442.484	16.7768	17.7952	14.7406	16.4375	0.0358177
DDB_G0276049	2266.5	4.73525	0.494593	9.57403	1.03e-21	1.92e-20	7792.51	2935.81	5364.16	190.44	179.287	234.445	201.39	0.0361852
DDB_G0268144	272.999	4.72323	0.276777	17.0651	2.7e-65	2.68e-63	765.708	526.131	645.92	24.9385	22.244	25.9715	24.3847	0.0363785
DDB_G0270430	2424.99	4.71507	0.912191	5.16895	2.35e-07	1.18e-06	10433.4	1036.48	5734.95	214.018	218.881	222.161	218.353	0.0366777
DDB_G0284645	468.801	4.70023	0.248298	18.9298	6.48e-80	8.72e-78	937.601	1278.5	1108.05	44.4359	46.2675	37.2024	42.6353	0.0370521
DDB_G0285845	91.6837	4.70473	0.64625	7.28005	3.34e-13	3.12e-12	328.16	105.226	216.693	8.38841	10.6771	5.96642	8.34398	0.0370782
DDB_G0293700	11009.7	4.6951	0.253197	18.5432	9.25e-77	1.12e-74	21382.5	30652.4	26017.5	870.808	1025	1117.83	1004.55	0.0371751
DDB_G0277111	46.7843	4.65728	0.995015	4.68062	2.86e-06	1.24e-05	20.8356	199.93	110.383	4.30756	5.33856	3.50966	4.38526	0.0382098
DDB_G0283389	348.499	4.65028	0.643896	7.22211	5.12e-13	4.67e-12	1297.02	347.247	822.131	35.5941	37.3699	25.2695	32.7445	0.0383032
DDB_G0289397	3883.7	4.6438	0.539605	8.60592	7.57e-18	1.04e-16	13662.9	4656.26	9159.6	308.104	349.676	441.515	366.432	0.0384663
DDB_G0272308	11718.4	4.63975	0.226424	20.4914	2.57e-93	4.05e-91	23382.7	31883.6	27633.1	991.419	1097.96	1236.45	1108.61	0.0385715
DDB_G0270124	135.726	4.63405	0.550552	8.41709	3.86e-17	5.11e-16	187.52	452.473	319.997	14.7364	15.1259	8.77414	12.8788	0.0386896
DDB_G0278523	247.024	4.62885	0.550254	8.4122	4.02e-17	5.31e-16	875.094	289.372	582.233	22.6714	24.4684	23.5147	23.5515	0.0388777
DDB_G0290315	15280.5	4.61914	0.236922	19.4964	1.18e-84	1.73e-82	29737.6	42269.4	36003.5	1310.86	1486.34	1598.3	1465.17	0.0391038
DDB_G0279585	64.4311	4.59221	0.839573	5.4697	4.51e-08	2.46e-07	218.774	84.181	151.477	2.72057	11.5669	4.91352	6.40032	0.0405398
DDB_G0288101	1027	4.55293	0.468653	9.71493	2.6e-22	5e-21	1395.98	3430.38	2413.18	91.1389	119.228	98.2704	102.879	0.040889
DDB_G0287667	215.602	4.55217	0.644382	7.0644	1.61e-12	1.41e-11	239.609	773.413	506.511	18.5905	30.2518	16.1444	21.6623	0.0410135
DDB_G0280689	208.98	4.5483	0.557977	8.15141	3.6e-16	4.34e-15	729.245	252.543	490.894	17.0035	22.244	23.8657	21.0377	0.0410948
DDB_G0277253	408.83	4.54439	0.681936	6.66395	2.67e-11	2.07e-10	1547.04	373.553	960.298	40.8085	51.1612	31.5869	41.1855	0.0411245
DDB_G0289149	2039.8	4.53916	0.350058	12.9669	1.89e-38	8.57e-37	6287.14	3293.58	4790.36	194.294	217.991	206.017	206.101	0.0412493
DDB_G0273915	133.254	4.53812	1.15418	3.9319	8.43e-05	0.000283438	26.0445	599.79	312.917	11.109	14.2362	15.0915	13.4789	0.0412961
DDB_G0287685	779.492	4.52237	0.436977	10.3492	4.22e-25	9.72e-24	1349.1	2309.72	1829.41	74.1354	56.0549	108.448	79.5462	0.04167
DDB_G0281093	33591.6	4.52279	0.444591	10.1729	2.62e-24	5.74e-23	112033	45636.6	78834.8	3406.15	3445.15	3437.01	3429.44	0.0416881
DDB_G0274943	684.103	4.52154	0.577495	7.82958	4.9e-15	5.34e-14	2458.6	752.368	1605.48	79.5765	58.7242	71.246	69.8489	0.0416926
DDB_G0290839	167.754	4.52818	0.784729	5.77037	7.91e-09	4.73e-08	182.311	605.051	393.681	14.5097	28.4723	8.42318	17.1351	0.0417098
DDB_G0275475	226.147	4.51305	0.354688	12.724	4.35e-37	1.83e-35	661.53	399.86	530.695	25.3919	18.685	25.2695	23.1155	0.041739
DDB_G0278393	64.5279	4.5112	0.696701	6.47509	9.48e-11	6.89e-10	234.4	68.3971	151.399	8.1617	7.11808	4.56255	6.61411	0.0418581
DDB_G0283149	204.939	4.50088	0.513072	8.77241	1.75e-18	2.54e-17	682.365	278.85	480.607	22.8981	16.0157	24.5676	21.1605	0.0421718
DDB_G0277881	1038.62	4.49951	0.873333	5.15212	2.58e-07	1.28e-06	4365.05	505.086	2435.07	109.276	102.767	110.905	107.649	0.0423364
DDB_G0281767	116.168	4.48434	0.290765	15.4225	1.15e-53	8.5e-52	260.445	284.111	272.278	12.0158	10.2322	14.0386	12.0956	0.0425341
DDB_G0282759	2258.62	4.48031	0.229252	19.5431	4.72e-85	7.04e-83	5672.49	4908.81	5290.65	229.434	283.389	198.998	237.273	0.0429227
DDB_G0292870	3148.6	4.47846	0.621371	7.20738	5.7e-13	5.17e-12	11725.2	3025.26	7375.24	358.888	338.109	295.513	330.837	0.0429319
DDB_G0279577	127.494	4.44111	0.319938	13.8812	8.24e-44	4.55e-42	296.907	299.895	298.401	14.7364	9.78736	16.1444	13.5561	0.0434549
DDB_G0273611	1530.39	4.45847	0.563266	7.91539	2.46e-15	2.75e-14	5500.59	1662.58	3581.58	153.032	169.054	166.709	162.932	0.0435121
DDB_G0275123	698.352	4.45874	0.489038	9.11738	7.7e-20	1.23e-18	906.348	2362.33	1634.34	65.0669	75.1847	82.8279	74.3598	0.0435184
DDB_G0278499	4178.59	4.45095	0.989384	4.49871	6.84e-06	2.78e-05	18205.1	1346.9	9775.99	452.747	461.785	426.423	446.985	0.0437236
DDB_G0277599	133.587	4.44323	0.663854	6.69309	2.19e-11	1.72e-10	125.013	499.825	312.419	14.283	15.1259	13.6877	14.3655	0.0439602
DDB_G0290377	115.4	4.44152	0.336066	13.2162	7.07e-40	3.49e-38	223.983	315.679	269.831	12.9227	14.2362	10.178	12.4456	0.0440902
DDB_G0283393	27871.7	4.43769	0.49576	8.9513	3.51e-19	5.39e-18	93749.7	36587.2	65168.4	2354.88	3170.21	3496.67	3007.25	0.0441104
DDB_G0276125	50.4125	4.40828	0.442888	9.95348	2.44e-23	4.92e-22	104.178	131.533	117.855	6.80141	5.33856	4.21159	5.45052	0.0442032
DDB_G0292754	1745.07	4.42989	0.506718	8.74231	2.28e-18	3.29e-17	6026.69	2130.83	4078.76	173.889	200.196	193.733	189.273	0.0443466
DDB_G0271728	153.927	4.42557	0.975539	4.53654	5.72e-06	2.35e-05	661.53	57.8745	359.702	15.87	16.4606	17.8992	16.7433	0.0444773
DDB_G0287329	77.4971	4.39272	0.540796	8.12269	4.56e-16	5.46e-15	109.387	252.543	180.965	10.2021	6.22832	9.12511	8.51852	0.0449565
DDB_G0280825	67.0662	4.40041	0.815845	5.39368	6.9e-08	3.69e-07	265.654	47.3518	156.503	5.89456	8.00784	8.42318	7.44186	0.0453925
DDB_G0283813	1300.23	4.38978	0.412676	10.6374	2e-26	4.92e-25	4135.86	1930.9	3033.38	131.721	166.83	135.824	144.791	0.0455581
DDB_G0268828	438.276	4.35685	0.536656	8.11851	4.72e-16	5.64e-15	1510.58	531.393	1020.99	49.4236	41.3738	58.6113	49.8029	0.0465105
DDB_G0291998	336.894	4.34602	0.305179	14.2409	5.11e-46	3.05e-44	916.766	652.403	784.584	40.1283	30.2518	44.9236	38.4346	0.0466995
DDB_G0295781	788.553	4.35113	0.230483	18.8783	1.72e-79	2.26e-77	2047.1	1625.75	1836.42	84.1108	80.5233	105.29	89.9746	0.0467062
DDB_G0272724	8997.71	4.3317	0.228404	18.965	3.32e-80	4.58e-78	24122.4	17746.4	20934.4	904.135	1117.09	1098.52	1039.92	0.0473242
DDB_G0293212	529.329	4.32346	0.760234	5.68701	1.29e-08	7.53e-08	2099.18	363.031	1231.11	65.2936	55.61	63.5248	61.4761	0.0475606
DDB_G0292860	258.822	4.31666	0.230114	18.7587	1.64e-78	2.11e-76	614.65	589.267	601.958	33.7804	31.1416	25.2695	30.0638	0.0475677
DDB_G0286671	463.339	4.31143	0.371282	11.6123	3.57e-31	1.15e-29	786.543	1367.94	1077.24	65.5203	44.0431	52.6449	54.0694	0.0477936
DDB_G0292934	91.2779	4.31639	0.304763	14.1631	1.55e-45	9.05e-44	208.356	215.714	212.035	9.52198	11.5669	11.2309	10.7733	0.0483522
DDB_G0284255	319.934	4.295	0.201973	21.2652	2.38e-100	4.31e-98	802.17	683.971	743.07	39.4482	40.0392	34.0437	37.8437	0.0484608
DDB_G0273885	4877.19	4.27585	0.172154	24.8374	3.54e-136	1.35e-133	12147.1	10485.8	11316.5	593.537	642.852	516.621	584.337	0.0491006
DDB_G0268720	283.014	4.26365	0.297011	14.3552	9.89e-47	6.1e-45	807.379	505.086	656.233	32.6468	33.8109	36.1495	34.2024	0.0495374
DDB_G0282937	73.226	4.24677	0.583681	7.27584	3.44e-13	3.21e-12	244.818	94.7037	169.761	10.2021	6.22832	10.178	8.86948	0.0496527
DDB_G0272720	5095.59	4.25616	0.155376	27.3926	3.36e-165	1.69e-162	11605.4	12016.8	11811.1	541.166	644.186	670.344	618.566	0.0497651
DDB_G0271628	250.025	4.23983	0.339746	12.4794	9.67e-36	3.75e-34	427.129	731.323	579.226	34.2338	29.3621	28.0773	30.5577	0.0501124
DDB_G0291281	54.4718	4.25147	1.34909	3.15136	0.00162512	0.00415523	15.6267	236.759	126.193	5.66784	12.9015	1.40386	6.65774	0.0501145
DDB_G0269334	5743.39	4.24011	0.175749	24.1259	1.34e-128	4.76e-126	12803.5	13800.4	13301.9	601.698	746.954	764.403	704.352	0.0502882
DDB_G0269106	278.343	4.228	0.297508	14.2114	7.79e-46	4.6e-44	515.681	773.413	644.547	38.7681	29.807	34.0437	34.2062	0.0503957
DDB_G0277909	1507.62	4.23699	0.210205	20.1564	2.36e-90	3.67e-88	3151.38	3830.24	3490.81	157.566	203.755	195.137	185.486	0.0504546
DDB_G0287465	269.609	4.22393	0.425439	9.9284	3.13e-23	6.24e-22	479.218	768.152	623.685	22.218	39.1494	39.3082	33.5585	0.0510595
DDB_G0295473	912.896	4.21429	0.351383	11.9934	3.85e-33	1.35e-31	2771.13	1452.12	2111.63	114.49	108.106	118.626	113.741	0.051111
DDB_G0279061	8977.83	4.21408	0.540472	7.79703	6.34e-15	6.85e-14	31414.8	10117.5	20766.2	1033.59	1091.29	1231.89	1118.92	0.0511271
DDB_G0269596	74.622	4.19183	0.46049	9.10298	8.79e-20	1.4e-18	213.565	131.533	172.549	10.2021	6.22832	11.5819	9.33744	0.0513367
DDB_G0272250	23924.5	4.19904	0.567338	7.4013	1.35e-13	1.3e-12	84910.2	25680.5	55295.3	2613.33	3101.26	3317.33	3010.64	0.0516352
DDB_G0270088	116.741	4.16586	0.463944	8.97922	2.73e-19	4.22e-18	322.952	215.714	269.333	17.2302	18.685	9.12511	15.0134	0.0527999
DDB_G0286389	15587.3	4.14717	0.195444	21.2192	6.35e-100	1.13e-97	38306.2	33546.1	35926.2	1710.1	2123.86	2250.04	2028	0.0534329
DDB_G0268462	239.031	4.11026	0.486932	8.44114	3.14e-17	4.18e-16	531.307	568.222	549.765	21.7645	24.0235	49.8371	31.8751	0.0548021
DDB_G0292696	83.172	4.10246	0.362841	11.3065	1.22e-29	3.68e-28	151.058	231.498	191.278	10.8823	9.78736	12.6348	11.1015	0.0548547
DDB_G0291568	1024.5	4.10597	0.907	4.52697	5.98e-06	2.46e-05	3891.05	820.765	2355.91	98.6205	251.357	60.7171	136.898	0.0549174
DDB_G0293202	61.6043	4.10929	0.614629	6.68581	2.3e-11	1.8e-10	78.1334	205.191	141.662	6.34799	7.11808	11.2309	8.23232	0.0549207
DDB_G0274661	462.804	4.09436	0.295779	13.8426	1.41e-43	7.74e-42	948.019	1178.53	1063.28	47.3832	66.732	73.3518	62.489	0.055508
DDB_G0279033	142.018	4.08567	0.645868	6.32586	2.52e-10	1.76e-09	510.472	142.055	326.264	22.8981	19.5747	15.0915	19.1881	0.055545
DDB_G0271340	130.246	4.08651	0.595232	6.86541	6.63e-12	5.46e-11	156.267	441.95	299.109	16.0967	23.5786	13.3367	17.6707	0.0557823
DDB_G0270408	83.0417	4.06921	0.54055	7.5279	5.16e-14	5.16e-13	276.071	105.226	190.649	13.1494	10.2322	10.529	11.3035	0.0559713
DDB_G0288219	764.01	4.05416	0.593348	6.83269	8.33e-12	6.77e-11	2666.95	836.549	1751.75	77.7628	110.33	128.453	105.516	0.0568122
DDB_G0277989	109.598	4.04933	0.468334	8.64625	5.32e-18	7.46e-17	255.236	247.282	251.259	18.3638	18.685	8.42318	15.1573	0.0568934
DDB_G0268176	71.8579	4.06422	0.551755	7.36599	1.76e-13	1.68e-12	197.938	131.533	164.735	9.52198	14.681	5.61545	9.93949	0.0569028
DDB_G0272158	92.7536	4.0179	0.55714	7.21165	5.53e-13	5.02e-12	140.64	284.111	212.376	18.1371	12.4566	8.42318	13.0056	0.0577051
DDB_G0281229	1606.77	4.01161	0.451859	8.87803	6.81e-19	1.02e-17	5214.1	2136.09	3675.1	208.803	227.779	247.08	227.887	0.0583879
DDB_G0277189	412.378	4.00958	1.19875	3.3448	0.000823429	0.0022492	1828.32	57.8745	943.098	50.3305	61.8383	63.5248	58.5645	0.0584673
DDB_G0276477	2055.57	4.00287	0.421763	9.49081	2.29e-21	4.15e-20	2979.49	6418.8	4699.15	244.171	299.849	335.523	293.181	0.0587263
DDB_G0280779	65.3199	3.97601	0.366934	10.8358	2.33e-27	6.17e-26	130.222	168.362	149.292	10.8823	8.00784	9.12511	9.3384	0.0588689
DDB_G0273949	463.153	3.99651	0.422735	9.45395	3.26e-21	5.83e-20	1416.82	699.755	1058.29	63.0264	81.413	54.7506	66.3967	0.0590359
DDB_G0271882	128.422	3.98091	0.356984	11.1515	7.04e-29	2.04e-27	239.609	347.247	293.428	20.4042	13.7913	21.0579	18.4178	0.0590607
DDB_G0290127	100.678	4.00295	0.558548	7.16671	7.68e-13	6.88e-12	307.325	152.578	229.951	10.2021	21.3542	11.9328	14.4964	0.0593026
DDB_G0285783	229.893	3.9865	0.515993	7.72588	1.11e-14	1.17e-13	760.499	289.372	524.936	29.0194	40.0392	30.534	33.1975	0.0594796
DDB_G0292830	1482.86	3.97924	0.364242	10.9247	8.78e-28	2.38e-26	2708.63	4061.73	3385.18	182.958	175.283	285.686	214.642	0.0596258
DDB_G0276919	161.32	3.97911	0.608093	6.54359	6.01e-11	4.47e-10	531.307	205.191	368.249	17.9104	17.7952	34.3946	23.3667	0.0596675
DDB_G0284777	314.555	3.97397	0.269611	14.7397	3.59e-49	2.37e-47	567.77	868.117	717.943	47.3832	44.9329	44.5726	45.6296	0.059758
DDB_G0269202	1741.67	3.96771	0.585401	6.77776	1.22e-11	9.76e-11	1922.08	6024.21	3973.14	210.39	332.325	219.354	254.023	0.060093
DDB_G0290885	1269.31	3.95887	0.450503	8.78767	1.53e-18	2.24e-17	4094.19	1694.14	2894.17	206.536	177.952	173.728	186.072	0.0604083
DDB_G0268680	316.284	3.9544	0.480597	8.2281	1.9e-16	2.37e-15	1015.73	426.166	720.951	42.6222	40.0392	56.8564	46.5059	0.0605975
DDB_G0270214	46.0514	3.93782	0.542322	7.26104	3.84e-13	3.55e-12	78.1334	131.533	104.833	7.48156	8.8976	4.21159	6.86358	0.0614484
DDB_G0272756	128.444	3.92963	0.797931	4.92477	8.45e-07	3.92e-06	479.218	105.226	292.222	10.6555	25.3582	21.7599	19.2579	0.0618269
DDB_G0284277	59.9273	3.92477	0.414932	9.45881	3.11e-21	5.57e-20	114.596	157.839	136.218	8.61512	11.5669	7.01931	9.06711	0.0624092
DDB_G0283787	71.5319	3.87296	0.493955	7.84071	4.48e-15	4.91e-14	166.685	157.839	162.262	9.52198	7.11808	16.4954	11.0451	0.0637316
DDB_G0268850	48.5311	3.88637	0.756997	5.13394	2.84e-07	1.41e-06	83.3423	136.794	110.068	7.25484	12.4566	2.80773	7.5064	0.0638437
DDB_G0270700	54.488	3.82937	0.536431	7.13861	9.43e-13	8.35e-12	72.9245	173.623	123.274	9.97541	8.8976	7.01931	8.63077	0.0654319
DDB_G0276319	51.0144	3.83632	0.512446	7.4863	7.08e-14	6.99e-13	78.1334	152.578	115.356	8.1617	10.2322	5.96642	8.12012	0.0657628
DDB_G0286117	47068.3	3.82726	0.686788	5.57269	2.51e-08	1.42e-07	174910	37939.3	106424	6126.26	8178.23	8188.38	7497.62	0.0658136
DDB_G0270838	324.596	3.81778	0.183827	20.7684	8.36e-96	1.42e-93	677.156	789.197	733.177	49.4236	55.61	51.592	52.2085	0.066475
DDB_G0284831	64.8771	3.78066	0.429212	8.80836	1.27e-18	1.88e-17	187.52	105.226	146.373	12.4693	9.34248	9.82704	10.5463	0.0672081
DDB_G0274171	240.23	3.79506	0.711746	5.33205	9.71e-08	5.09e-07	536.516	547.177	541.846	30.8331	71.1808	15.4425	39.1521	0.0673876
DDB_G0275959	305.885	3.78697	0.453507	8.35041	6.8e-17	8.84e-16	406.294	973.343	689.819	52.3709	45.8226	51.592	49.9285	0.067494
DDB_G0275469	1127.15	3.76824	0.523969	7.19173	6.4e-13	5.77e-12	3667.06	1410.03	2538.55	211.977	134.354	212.334	186.222	0.0683441
DDB_G0289761	263.424	3.76824	0.41095	9.16959	4.75e-20	7.67e-19	802.17	384.076	593.123	38.7681	48.9368	43.1688	43.6245	0.0685115
DDB_G0275069	619.896	3.74748	0.345415	10.8492	2.01e-27	5.38e-26	1046.99	1741.5	1394.24	124.466	100.543	85.9866	103.665	0.0692067
DDB_G0278959	8452.81	3.74367	0.567312	6.59896	4.14e-11	3.14e-10	8875.96	29131.9	19003.9	1203.85	1516.15	1536.18	1418.73	0.0694682
DDB_G0286239	1070.35	3.74023	0.664809	5.62603	1.84e-08	1.05e-07	3911.88	899.685	2405.78	159.153	200.641	180.396	180.063	0.0696342
DDB_G0293898	11761.1	3.73655	0.328968	11.3584	6.74e-30	2.05e-28	33790.1	19067	26428.6	1774.04	1961.48	2212.84	1982.78	0.0697885
DDB_G0269572	92.1031	3.7297	0.311594	11.9697	5.12e-33	1.78e-31	171.894	242.02	206.957	15.87	14.2362	16.4954	15.5338	0.0698179
DDB_G0275093	431.985	3.7264	0.288904	12.8984	4.6e-38	2.03e-36	1177.21	762.891	970.051	78.443	77.854	63.5248	73.2739	0.0702312
DDB_G0278581	1605.41	3.72152	0.202345	18.3919	1.52e-75	1.83e-73	3146.17	4061.73	3603.95	275.684	245.129	298.321	273.045	0.0704268
DDB_G0282793	191.964	3.70834	0.680297	5.45106	5.01e-08	2.72e-07	697.992	163.101	430.546	36.0475	27.5826	35.0966	32.9089	0.0710077
DDB_G0277357	421.789	3.70663	0.286523	12.9366	2.8e-38	1.25e-36	744.872	1146.97	945.919	72.3217	64.0627	80.7221	72.3688	0.0710691
DDB_G0289599	3970.22	3.69922	0.299375	12.3565	4.49e-35	1.71e-33	6594.46	11201.3	8897.9	637.066	706.469	711.758	685.098	0.071491
DDB_G0276917	2689.22	3.69879	0.255356	14.4849	1.51e-47	9.47e-46	7328.92	4724.66	6026.79	462.043	479.136	451.342	464.173	0.0715107
DDB_G0274041	46.632	3.69293	0.626045	5.89883	3.66e-09	2.28e-08	145.849	63.1358	104.492	7.25484	5.33856	11.5819	8.05842	0.0715981
DDB_G0275335	254.447	3.68968	0.363769	10.1429	3.56e-24	7.7e-23	739.663	399.86	569.762	38.9948	44.9329	48.7842	44.2373	0.0720478
DDB_G0287399	5457.45	3.68687	0.193716	19.0324	9.2e-81	1.29e-78	13975.5	10464.8	12220.1	943.81	1005.43	897.77	949.003	0.0720628
DDB_G0292016	2304.5	3.66922	0.163128	22.4929	4.87e-112	1.12e-109	4651.54	5655.91	5153.73	425.995	415.963	373.077	405.012	0.0728603
DDB_G0287609	149.016	3.65792	0.485051	7.54132	4.65e-14	4.68e-13	197.938	468.257	333.098	30.1529	21.3542	27.3753	26.2942	0.073163
DDB_G0274389	848.473	3.66109	0.242347	15.1068	1.46e-51	1e-49	2224.2	1567.87	1896.04	138.069	167.275	144.949	150.097	0.0733567
DDB_G0287833	182.203	3.65958	0.656249	5.57651	2.45e-08	1.39e-07	645.903	168.362	407.133	26.2988	31.1416	39.3082	32.2495	0.0733974
DDB_G0283707	2839.14	3.6553	0.106674	34.2662	2.5e-257	3.45e-254	6729.89	5955.81	6342.85	509.199	499.6	501.179	503.326	0.0735193
DDB_G0283571	51.4114	3.66482	0.75686	4.84213	1.28e-06	5.79e-06	182.311	47.3518	114.832	7.02813	13.3464	7.01931	9.13128	0.0736614
DDB_G0274499	249.055	3.64757	0.551012	6.61978	3.6e-11	2.75e-10	828.214	284.111	556.163	50.3305	35.5904	47.0294	44.3168	0.0738023
DDB_G0272016	226.987	3.64406	0.508104	7.17187	7.4e-13	6.64e-12	739.663	273.588	506.626	36.2742	40.4841	44.9236	40.5606	0.0741258
DDB_G0291314	477.009	3.64144	0.579521	6.28353	3.31e-10	2.29e-09	1239.72	889.162	1064.44	84.5642	131.24	40.3611	85.3883	0.0742618
DDB_G0285597	6409.8	3.6366	0.900112	4.04016	5.34e-05	0.000185462	2693	25906.7	14299.9	1083.92	1101.52	1263.83	1149.76	0.0744198
DDB_G0270964	160.741	3.62523	0.382164	9.48604	2.4e-21	4.33e-20	411.503	305.156	358.329	25.8454	22.244	38.9572	29.0155	0.0749087
DDB_G0274549	388.571	3.62699	0.201811	17.9722	3.22e-72	3.59e-70	932.392	799.72	866.056	63.7066	68.0666	78.9673	70.2468	0.0750258
DDB_G0276899	709.453	3.61924	0.417573	8.66734	4.42e-18	6.28e-17	2177.32	983.866	1580.59	119.478	142.362	124.242	128.694	0.075291
DDB_G0283305	97.4856	3.59798	0.588201	6.11692	9.54e-10	6.34e-09	317.743	115.749	216.746	12.696	19.1298	22.1108	17.9789	0.0765956
DDB_G0347658	5049.45	3.58677	0.561131	6.39203	1.64e-10	1.16e-09	17225.8	5219.22	11222.5	858.565	947.594	996.041	934.067	0.0768363
DDB_G0270836	768.289	3.58674	0.463857	7.73243	1.06e-14	1.12e-13	1000.11	2414.94	1707.53	146.911	160.157	119.328	142.132	0.0768423
DDB_G0278821	104.36	3.58523	1.07781	3.32639	0.000879786	0.0023906	437.547	26.3066	231.927	22.6714	19.1298	16.1444	19.3152	0.0768789
DDB_G0279997	9507.89	3.56315	0.293107	12.1565	5.3e-34	1.92e-32	26112.2	16073.3	21092.8	1569.54	1875.17	1909.25	1784.65	0.0780094
DDB_G0276293	495.847	3.56155	0.978208	3.6409	0.000271691	0.000824108	2036.68	163.101	1099.89	101.568	91.2004	86.6885	93.1522	0.0780796
DDB_G0271068	233.001	3.55663	0.6289	5.65532	1.56e-08	8.98e-08	281.28	752.368	516.824	66.4271	31.5865	33.3417	43.7851	0.0781027
DDB_G0269276	141.745	3.54965	0.461511	7.69135	1.46e-14	1.52e-13	281.28	347.247	314.264	26.9789	16.0157	37.2024	26.7323	0.0783949
DDB_G0289863	135.616	3.55905	0.374365	9.50688	1.96e-21	3.58e-20	385.458	215.714	300.586	21.7645	28.4723	26.6734	25.6367	0.0785866
DDB_G0267426	1678.23	3.5508	0.211373	16.7988	2.49e-63	2.33e-61	3245.14	4193.27	3719.2	279.538	324.318	348.86	317.572	0.0786697
DDB_G0273675	85.3441	3.55121	0.810393	4.38208	1.18e-05	4.58e-05	72.9245	305.156	189.04	10.2021	25.803	12.6348	16.2133	0.0789916
DDB_G0276157	98.1161	3.5344	0.273168	12.9385	2.73e-38	1.22e-36	223.983	210.453	217.218	19.7241	19.5747	16.8464	18.7151	0.0793237
DDB_G0286015	187.523	3.53809	0.580437	6.09557	1.09e-09	7.19e-09	630.276	199.93	415.103	29.0194	40.4841	37.9043	35.8026	0.0794015
DDB_G0277525	60.2543	3.54156	0.400682	8.83884	9.67e-19	1.44e-17	166.685	99.965	133.325	9.97541	12.0118	12.6348	11.5406	0.0796646
DDB_G0287125	7022.9	3.52586	0.376844	9.35629	8.26e-21	1.43e-19	20856.4	10212.2	15534.3	1447.11	1344.43	1254.35	1348.63	0.0798813
DDB_G0269248	1034.96	3.52378	0.374617	9.40635	5.14e-21	9.03e-20	1510.58	3067.35	2288.96	211.297	192.188	193.382	198.956	0.0799688
DDB_G0275209	1934.87	3.51947	0.605914	5.80853	6.3e-09	3.81e-08	6761.15	1794.11	4277.63	373.624	367.471	377.99	373.028	0.0802099
DDB_G0280171	816.566	3.51666	0.269076	13.0694	4.93e-39	2.34e-37	1521	2088.74	1804.87	169.355	175.283	128.453	157.697	0.0803525
DDB_G0283637	81.5091	3.51135	0.623049	5.63575	1.74e-08	9.97e-08	281.28	78.9197	180.1	16.7768	15.1259	15.4425	15.7817	0.0805677
DDB_G0282997	1381.6	3.50095	0.191936	18.2401	2.48e-74	2.88e-72	3406.62	2693.79	3050.21	280.445	241.125	286.037	269.202	0.0810995
DDB_G0290547	855.253	3.5003	0.513813	6.8124	9.6e-12	7.77e-11	2791.97	983.866	1887.92	172.076	147.255	181.098	166.81	0.0811834
DDB_G0271148	11159.2	3.49817	0.163679	21.3722	2.43e-101	4.54e-99	23054.6	26201.3	24628	1923.67	2255.99	2360.24	2179.97	0.081318
DDB_G0270164	59.3339	3.47191	0.458084	7.5792	3.48e-14	3.53e-13	125.013	136.794	130.904	14.0563	7.11808	13.6877	11.6207	0.0815345
DDB_G0290297	69.9411	3.50433	0.422499	8.29429	1.09e-16	1.39e-15	182.311	126.272	154.291	13.1494	17.7952	10.178	13.7075	0.081593
DDB_G0279939	61.7087	3.47591	0.346021	10.0454	9.63e-24	2.02e-22	140.64	131.533	136.087	13.8295	12.0118	10.529	12.1234	0.081799
DDB_G0279195	1016.66	3.48575	0.411427	8.47235	2.4e-17	3.22e-16	3099.29	1383.73	2241.51	200.415	198.416	201.454	200.095	0.0819524
DDB_G0277851	1652.17	3.48323	0.436105	7.98714	1.38e-15	1.58e-14	5026.58	2257.1	3641.84	326.014	379.483	271.647	325.715	0.0820945
DDB_G0270424	16016.1	3.47859	0.334284	10.4061	2.33e-25	5.4e-24	45317.4	25264.8	35291.1	2791.75	3211.14	3495.27	3166.05	0.0823268
DDB_G0277907	8914.02	3.4711	0.361985	9.58907	8.89e-22	1.66e-20	13652.5	25606.8	19629.7	1487.92	1885.85	1936.98	1770.25	0.0827223
DDB_G0272396	194.593	3.44892	0.538067	6.40983	1.46e-10	1.04e-09	218.774	636.619	427.696	34.4605	39.5943	43.5197	39.1915	0.083942
DDB_G0281983	107.034	3.43717	0.499421	6.88231	5.89e-12	4.87e-11	312.534	157.839	235.187	24.9385	14.2362	25.6205	21.5984	0.0841108
DDB_G0278333	2140.44	3.43452	0.450125	7.63016	2.34e-14	2.4e-13	6651.76	2746.41	4699.08	426.675	481.805	395.538	434.673	0.0846696
DDB_G0271790	169.923	3.42742	0.887941	3.85997	0.000113402	0.000372317	666.739	78.9197	372.829	38.0879	36.0353	29.8321	34.6518	0.085039
DDB_G0270884	2321.36	3.42658	0.107013	32.0201	5.73e-225	6.33e-222	5287.03	4898.28	5092.66	455.921	467.569	498.02	473.837	0.085123
DDB_G0269378	349.816	3.42505	0.164634	20.804	3.98e-96	6.86e-94	713.619	820.765	767.192	69.6011	73.8501	71.246	71.5657	0.0853235
DDB_G0279683	58.3943	3.44173	0.56543	6.08694	1.15e-09	7.56e-09	166.685	89.4423	128.064	7.70827	16.9054	11.2309	11.9482	0.0853372
DDB_G0277749	195.207	3.42159	0.63764	5.36602	8.05e-08	4.27e-07	677.156	178.885	428.021	33.5536	45.3778	41.063	39.9981	0.0854627
DDB_G0269364	1108.52	3.41673	0.185892	18.3802	1.89e-75	2.25e-73	2724.25	2136.09	2430.17	230.568	209.538	242.166	227.424	0.0855751
DDB_G0285939	386.536	3.41448	0.416222	8.20351	2.33e-16	2.88e-15	994.899	699.755	847.327	82.9772	51.1612	103.886	79.3414	0.0856201
DDB_G0286619	397.001	3.4088	0.215944	15.7856	3.91e-56	3.06e-54	744.872	994.388	869.63	77.7628	79.1886	88.7943	81.9153	0.0860865
DDB_G0284671	3671.76	3.38619	0.365045	9.27609	1.76e-20	2.95e-19	10683.4	5371.8	8027.62	737.953	824.363	741.24	767.852	0.0873008
DDB_G0270522	55.2928	3.37841	0.798888	4.22889	2.35e-05	8.67e-05	36.4623	205.191	120.827	11.3357	9.78736	13.6877	11.6036	0.0876202
DDB_G0294489	452.06	3.37178	0.627149	5.37637	7.6e-08	4.04e-07	401.085	1573.13	987.109	91.3657	96.0941	98.6214	95.3604	0.0880952
DDB_G0286637	2449.18	3.36389	0.136001	24.7344	4.56e-135	1.68e-132	5328.7	5361.28	5344.99	572.452	499.155	484.333	518.647	0.0884514
DDB_G0285345	79.32	3.36319	0.475509	7.07283	1.52e-12	1.32e-11	104.178	242.02	173.099	16.3234	15.1259	18.9521	16.8005	0.0884703
DDB_G0274165	49.1165	3.363	0.430337	7.81481	5.5e-15	5.97e-14	140.64	73.6584	107.149	10.4288	10.6771	10.178	10.428	0.0886905
DDB_G0293742	66454.1	3.35995	0.188479	17.8267	4.39e-71	4.75e-69	145964	143950	144957	11761.5	15012.5	15583.2	14119.1	0.0887568
DDB_G0272965	218.128	3.3585	0.32121	10.4558	1.38e-25	3.24e-24	604.232	347.247	475.739	45.7962	44.9329	48.4333	46.3874	0.0888433
DDB_G0286163	487.923	3.3497	0.512253	6.53914	6.19e-11	4.6e-10	1442.86	683.971	1063.42	100.888	69.4013	142.492	104.26	0.0892886
DDB_G0289207	109.332	3.35344	0.401924	8.34347	7.21e-17	9.37e-16	244.818	231.498	238.158	16.3234	23.1338	30.885	23.4474	0.0896288
DDB_G0276959	108.955	3.34429	0.813082	4.1131	3.9e-05	0.000139225	411.503	63.1358	237.319	21.9912	23.5786	24.5676	23.3792	0.0896789
DDB_G0270750	66.2025	3.33104	0.37884	8.79274	1.46e-18	2.15e-17	109.387	178.885	144.136	15.87	14.2362	12.6348	14.247	0.0899528
DDB_G0269404	140.241	3.33351	0.773792	4.30801	1.65e-05	6.27e-05	520.89	89.4423	305.166	28.5659	32.4762	29.8321	30.2914	0.0902989
DDB_G0268274	87.8948	3.33336	0.296292	11.2502	2.31e-29	6.83e-28	166.685	215.714	191.199	17.6837	18.685	20.707	19.0252	0.0904995
DDB_G0292312	405.13	3.32887	0.251954	13.2122	7.46e-40	3.66e-38	1046.99	715.539	881.263	91.3657	92.0902	79.6692	87.7083	0.0905169
DDB_G0267402	6967.29	3.32246	0.621743	5.34378	9.1e-08	4.79e-07	24122.4	6171.52	15147	1361.64	1618.03	1562.85	1514.17	0.0908806
DDB_G0293470	529.554	3.32078	0.168809	19.6718	3.76e-86	5.69e-84	1255.34	1047	1151.17	114.037	108.551	122.838	115.142	0.0909268
DDB_G0286187	9975.89	3.32037	0.184301	18.016	1.46e-72	1.64e-70	24221.4	19145.9	21683.6	2073.52	2048.23	2390.43	2170.73	0.0909991
DDB_G0269132	63.8964	3.32061	0.377754	8.79041	1.49e-18	2.19e-17	151.058	126.272	138.665	10.8823	15.1259	16.1444	14.0509	0.0920067
DDB_G0291081	723.678	3.29388	0.945574	3.48347	0.000494953	0.00142162	260.445	2877.94	1569.19	143.737	154.818	181.449	160.001	0.0925295
DDB_G0274273	1124.1	3.28839	0.102336	32.1334	1.51e-226	1.85e-223	2495.06	2378.11	2436.59	255.28	244.239	247.782	249.1	0.092751
DDB_G0290257	354.304	3.28358	0.228959	14.3414	1.21e-46	7.36e-45	635.485	899.685	767.585	81.1635	80.0784	75.1067	78.7829	0.0930835
DDB_G0285539	137.549	3.27563	0.41253	7.94035	2.02e-15	2.28e-14	390.667	205.191	297.929	36.9543	25.803	29.1302	30.6292	0.0932229
DDB_G0274899	952.415	3.28061	0.528609	6.20612	5.43e-10	3.68e-09	3099.29	1025.96	2062.62	203.136	213.987	219.705	212.276	0.0933121
DDB_G0275499	182.395	3.28226	0.25291	12.978	1.63e-38	7.47e-37	442.756	347.247	395.001	41.9421	44.9329	35.0966	40.6572	0.0933235
DDB_G0268892	242.087	3.28176	0.347742	9.43735	3.82e-21	6.78e-20	406.294	641.88	524.087	45.3428	66.732	50.1881	54.0876	0.0935489
DDB_G0288935	1745.36	3.27637	0.505164	6.48575	8.83e-11	6.44e-10	5583.94	1972.99	3778.46	420.781	381.262	367.812	389.952	0.0935491
DDB_G0281219	2231.09	3.27663	0.172874	18.9539	4.1e-80	5.59e-78	5203.69	4456.33	4830.01	516.227	538.75	440.462	498.48	0.0935499
DDB_G0268110	120.612	3.2722	0.641084	5.10416	3.32e-07	1.63e-06	406.294	115.749	261.021	25.6187	21.3542	34.0437	27.0055	0.0937604
DDB_G0278349	4474.27	3.27244	0.732207	4.46928	7.85e-06	3.16e-05	16382	2983.17	9682.57	974.189	1061.93	970.069	1002.06	0.0937854
DDB_G0274191	78.8401	3.25892	0.485689	6.70989	1.95e-11	1.54e-10	109.387	231.498	170.442	20.4042	19.5747	13.3367	17.7719	0.0944237
DDB_G0283095	34623	3.25018	0.205185	15.8403	1.64e-56	1.3e-54	82878.7	66660.9	74769.8	6957.17	7656.83	8961.21	7858.4	0.0951056
DDB_G0270658	1264.03	3.24654	0.511528	6.34675	2.2e-10	1.55e-09	1401.19	4056.47	2728.83	292.914	275.826	293.758	287.499	0.0953142
DDB_G0285505	31438.5	3.24474	0.399534	8.12133	4.61e-16	5.52e-15	92499.6	43216.4	67858	6389.47	7511.35	7575.59	7158.81	0.0954294
DDB_G0284093	18137.8	3.23944	0.336924	9.61475	6.93e-22	1.3e-20	50469	27790.3	39129.6	3667.32	4256.17	4506.4	4143.3	0.095748
DDB_G0267688	205.055	3.23683	0.241019	13.4298	4.05e-41	2.06e-39	500.054	384.076	442.065	42.3955	47.1573	51.592	47.0482	0.0961909
DDB_G0288279	59.6122	3.20194	0.436207	7.34041	2.13e-13	2.02e-12	104.178	152.578	128.378	16.7768	9.78736	14.7406	13.7682	0.0968597
DDB_G0282211	245.131	3.21463	0.471551	6.81714	9.29e-12	7.54e-11	755.29	299.895	527.592	56.9052	52.4958	61.068	56.823	0.0972305
DDB_G0287027	70.4096	3.21393	0.492669	6.52351	6.87e-11	5.08e-10	213.565	89.4423	151.504	14.9631	15.1259	18.9521	16.3471	0.0973905
DDB_G0293414	721.187	3.2074	0.515446	6.22257	4.89e-10	3.32e-09	2302.33	799.72	1551.03	152.578	176.172	175.132	167.961	0.0977093
DDB_G0287227	3351.87	3.20631	0.895199	3.58167	0.000341405	0.00101193	13032.7	1383.73	7208.19	725.938	861.733	755.278	780.983	0.0977551
DDB_G0290647	321.4	3.2029	0.176695	18.1268	1.96e-73	2.23e-71	703.201	678.71	690.955	72.3217	70.291	82.4769	75.0299	0.0979522
DDB_G0282077	4264.67	3.1964	0.246968	12.9426	2.59e-38	1.17e-36	7334.13	10990.9	9162.51	1017.26	925.35	1055.7	999.44	0.0983512
DDB_G0277889	485.348	3.19624	0.383757	8.32879	8.17e-17	1.05e-15	1395.98	689.232	1042.61	101.794	121.452	118.275	113.841	0.0984399
DDB_G0289521	187.162	3.18165	0.627953	5.0667	4.05e-07	1.96e-06	187.52	615.574	401.547	51.464	50.7163	30.534	44.2381	0.0992364
DDB_G0270276	79.673	3.17502	0.895382	3.546	0.000391133	0.001147	36.4623	305.156	170.809	17.0035	18.685	21.0579	18.9155	0.0996996
DDB_G0291796	788.446	3.17	0.208748	15.1858	4.39e-52	3.13e-50	1922.08	1457.38	1689.73	192.253	169.054	201.454	187.587	0.0999229
DDB_G0289485	1639.37	3.16763	0.341964	9.26306	1.99e-20	3.32e-19	2588.82	4435.29	3512.05	332.136	375.924	464.679	390.913	0.100158
DDB_G0275091	105.154	3.14822	0.380419	8.27567	1.28e-16	1.62e-15	208.356	242.02	225.188	33.1002	19.1298	23.1637	25.1313	0.100397
DDB_G0286991	413.881	3.15271	0.264237	11.9314	8.12e-33	2.8e-31	786.543	983.866	885.205	84.1108	95.2043	119.679	99.6648	0.101196
DDB_G0269118	2074.5	3.14328	0.781861	4.02025	5.81e-05	0.000200974	7667.49	1199.58	4433.54	511.92	531.632	461.871	501.807	0.101676
DDB_G0286205	488.495	3.1373	0.344738	9.10053	8.99e-20	1.43e-18	724.036	1362.68	1043.36	113.81	117.003	124.944	118.586	0.102058
DDB_G0291512	3201.36	3.13573	0.838599	3.73925	0.000184571	0.000578449	12115.9	1557.35	6836.62	749.516	813.686	770.37	777.857	0.102155
DDB_G0286119	127.329	3.13766	0.366973	8.55012	1.23e-17	1.68e-16	343.787	199.93	271.859	26.5255	30.2518	36.1495	30.9756	0.102286
DDB_G0284741	3416.75	3.13291	0.289244	10.8314	2.44e-27	6.42e-26	8959.3	5629.61	7294.45	757.451	793.666	943.747	831.621	0.10234
DDB_G0287071	50.2967	3.11233	0.41146	7.5641	3.91e-14	3.94e-13	98.969	115.749	107.359	13.8295	8.8976	14.0386	12.2553	0.102457
DDB_G0269160	9808.11	3.12556	0.190492	16.4078	1.68e-60	1.43e-58	19491.7	22355.3	20923.5	2033.62	2595.43	2564.51	2397.85	0.102818
DDB_G0288795	732.663	3.11244	0.581625	5.35129	8.73e-08	4.61e-07	2422.14	699.755	1560.95	187.719	165.94	187.767	180.475	0.103637
DDB_G0291428	390.009	3.1125	0.370194	8.40775	4.18e-17	5.51e-16	599.023	1062.79	830.904	85.2444	85.417	117.574	96.0783	0.103646
DDB_G0274551	3561.1	3.10805	0.128914	24.1096	1.98e-128	6.84e-126	8042.53	7123.82	7583.18	831.133	868.851	939.184	879.723	0.10395
DDB_G0279107	82.3559	3.09122	0.447593	6.90631	4.97e-12	4.15e-11	187.52	163.101	175.31	24.4851	12.4566	24.2166	20.3861	0.104172
DDB_G0282171	1964.26	3.09878	0.484349	6.39783	1.58e-10	1.12e-09	6005.86	2351.81	4178.83	401.283	548.537	513.814	487.878	0.104544
DDB_G0291526	22529.6	3.09761	0.363071	8.53168	1.44e-17	1.96e-16	62663	33188.4	47925.7	4721.54	6046.36	6028.89	5598.93	0.104605
DDB_G0271298	47774.6	3.09614	0.383565	8.07201	6.92e-16	8.15e-15	136348	66876.6	101612	10422.5	12678.2	12547.7	11882.8	0.104699
DDB_G0279723	860.908	3.09052	0.555018	5.56833	2.57e-08	1.45e-07	2797.18	862.856	1830.02	225.58	212.208	206.719	214.836	0.105062
DDB_G0291199	87.4419	3.10136	0.315559	9.82813	8.52e-23	1.67e-21	197.938	173.623	185.781	19.044	26.2479	20.356	21.8826	0.105376
DDB_G0279207	23749.3	3.08321	0.307107	10.0395	1.02e-23	2.14e-22	63402.7	37486.9	50444.8	5269.74	6338.65	6248.59	5952.33	0.105543
DDB_G0277827	85.4294	3.0699	0.813276	3.77473	0.00016018	0.000511747	52.089	310.418	181.253	26.9789	20.4645	17.1973	21.5469	0.106247
DDB_G0277147	107.704	3.0473	0.454207	6.70906	1.96e-11	1.55e-10	166.685	289.372	228.028	34.6872	28.4723	19.3031	27.4875	0.107577
DDB_G0267458	693.766	3.04558	0.139981	21.7572	5.91e-105	1.19e-102	1468.91	1467.91	1468.41	189.306	163.716	178.992	177.338	0.107755
DDB_G0267552	208.824	3.04213	0.34928	8.70971	3.05e-18	4.36e-17	572.979	310.418	441.698	58.0387	52.4958	50.1881	53.5742	0.108171
DDB_G0277413	285.039	3.04017	0.695565	4.37079	1.24e-05	4.8e-05	994.899	210.453	602.676	73.4553	78.2989	68.0873	73.2805	0.10841
DDB_G0284533	42827.4	3.03593	0.908935	3.34009	0.0008375	0.00228481	164414	16615.2	90514.4	9680.45	11807.6	11620.1	11036	0.108675
DDB_G0269156	14992.2	3.03429	0.234731	12.9267	3.18e-38	1.42e-36	36852.9	26506.5	31679.7	3415.22	3901.6	4284.59	3867.13	0.10879
DDB_G0293354	335.382	3.02682	0.394588	7.67085	1.71e-14	1.77e-13	958.437	457.734	708.086	87.7382	92.9799	80.0202	86.9128	0.109324
DDB_G0268600	351.591	3.01482	0.18245	16.5241	2.46e-61	2.17e-59	713.619	768.152	740.885	84.1108	101.878	90.1982	92.0622	0.110526
DDB_G0281393	2001.49	3.00828	0.176064	17.0863	1.88e-65	1.88e-63	4667.17	3767.1	4217.14	478.366	534.301	560.492	524.386	0.110595
DDB_G0276661	523.054	3.00554	0.187136	16.0607	4.81e-58	3.9e-56	1213.67	989.127	1101.4	125.599	148.59	138.28	137.49	0.110978
DDB_G0272206	356.022	2.99918	0.497837	6.02441	1.7e-09	1.1e-08	1099.08	399.86	749.468	99.0739	91.2004	90.9001	93.7248	0.111155
DDB_G0271774	190.992	2.99968	0.87973	3.40977	0.000650173	0.00181732	88.5512	715.539	402.045	43.7558	61.8383	45.2746	50.2896	0.111178
DDB_G0293102	193.062	3.00236	0.420419	7.14135	9.24e-13	8.2e-12	270.863	541.915	406.389	41.4886	60.5037	50.5391	50.8438	0.111199
DDB_G0267390	983.373	2.99424	0.424345	7.05614	1.71e-12	1.49e-11	2885.73	1252.19	2068.96	272.057	259.81	247.08	259.649	0.111504
DDB_G0290815	62.1566	2.99183	0.581288	5.14689	2.65e-07	1.32e-06	151.058	110.488	130.773	13.8295	9.78736	25.6205	16.4125	0.111509
DDB_G0285421	298.81	2.99477	0.745653	4.0163	5.91e-05	0.000203927	1057.41	199.93	628.668	73.682	95.6492	67.3854	78.9055	0.111516
DDB_G0281337	781.583	2.98953	0.37742	7.92095	2.36e-15	2.64e-14	2203.36	1083.83	1643.6	223.54	200.641	196.541	206.907	0.111811
DDB_G0274113	65518.7	2.98829	0.34179	8.74305	2.27e-18	3.27e-17	176779	98733.8	137757	14732.1	18192	19156.1	17360.1	0.111916
DDB_G0287081	105.774	2.98059	0.308348	9.66634	4.19e-22	7.96e-21	244.818	199.93	222.374	28.7927	22.6889	32.6398	28.0404	0.111976
DDB_G0291330	268.879	2.98261	0.197145	15.129	1.04e-51	7.19e-50	625.067	505.086	565.077	75.0423	72.5154	66.6835	71.4137	0.112199
DDB_G0286243	53.6486	2.97779	0.387732	7.68003	1.59e-14	1.66e-13	83.3423	142.055	112.699	14.0563	13.3464	15.4425	14.2817	0.112472
DDB_G0288381	48.7355	2.98661	0.764552	3.90635	9.37e-05	0.000312277	57.2979	147.317	102.307	5.89456	19.1298	14.0386	13.021	0.112904
DDB_G0282815	677.973	2.9633	0.246693	12.0121	3.07e-33	1.09e-31	1281.39	1562.61	1422	211.524	149.035	185.31	181.956	0.113442
DDB_G0287991	556.915	2.96595	0.869857	3.4097	0.000650342	0.00181734	2088.77	247.282	1168.02	140.563	163.716	144.247	149.508	0.113476
DDB_G0281913	1965.54	2.96253	0.197038	15.0353	4.31e-51	2.92e-49	4464.02	3777.62	4120.82	490.382	485.364	610.329	528.692	0.113709
DDB_G0278115	774.348	2.96137	0.407697	7.26367	3.77e-13	3.49e-12	1010.53	2236.06	1623.29	216.738	207.314	201.103	208.385	0.113767
DDB_G0269582	146.316	2.95061	0.278739	10.5856	3.48e-26	8.43e-25	250.027	363.031	306.529	41.2619	35.1455	42.1159	39.5078	0.114172
DDB_G0271794	155.56	2.95128	0.761839	3.87388	0.000107114	0.000352512	98.969	552.438	325.704	37.6345	48.047	40.712	42.1312	0.114538
DDB_G0275523	501.396	2.95277	0.182741	16.1582	9.94e-59	8.18e-57	1041.78	1057.52	1049.65	130.814	154.373	122.487	135.891	0.114624
DDB_G0280043	256.747	2.94105	0.254849	11.5404	8.25e-31	2.62e-29	432.338	641.88	537.109	74.1354	69.4013	65.9815	69.8394	0.115066
DDB_G0281445	225.842	2.94275	0.571684	5.14751	2.64e-07	1.31e-06	229.191	715.539	472.365	52.3709	73.8501	58.2603	61.4938	0.115187
DDB_G0295755	2112.14	2.93877	0.721978	4.07045	4.69e-05	0.000165107	7422.68	1410.03	4416.35	555.222	634.399	538.381	576.001	0.115377
DDB_G0272062	59.9083	2.93429	0.842333	3.48353	0.000494856	0.00142162	213.565	36.8292	125.197	19.044	19.5747	10.529	16.3825	0.115713
DDB_G0278407	645.881	2.92582	0.375689	7.78789	6.81e-15	7.34e-14	1765.82	931.253	1348.53	169.582	153.928	208.825	177.445	0.116283
DDB_G0275927	55.1453	2.9041	0.406984	7.13566	9.63e-13	8.51e-12	130.222	99.965	115.094	19.044	12.4566	14.0386	15.1797	0.116522
DDB_G0281401	420.561	2.91741	0.556944	5.23825	1.62e-07	8.28e-07	1328.27	426.166	877.217	107.462	105.437	135.473	116.124	0.116902
DDB_G0274181	1853.11	2.91216	0.1242	23.4474	1.41e-121	4.2e-119	3792.08	3935.46	3863.77	554.995	483.585	499.424	512.668	0.117143
DDB_G0293530	1127.28	2.9128	0.251018	11.6039	3.93e-31	1.26e-29	1948.13	2751.67	2349.9	270.243	320.314	346.052	312.203	0.117277
DDB_G0287879	204.534	2.9073	0.356771	8.14891	3.67e-16	4.43e-15	520.89	331.463	426.176	53.5045	46.2675	70.5441	56.772	0.117553
DDB_G0274339	5665	2.90359	0.296895	9.77986	1.37e-22	2.67e-21	14840.1	8754.83	11797.5	1475.68	1608.69	1645.68	1576.68	0.11789
DDB_G0270984	11567.3	2.90213	0.269166	10.7819	4.19e-27	1.09e-25	29503.2	18667.1	24085.2	2983.1	3280.55	3402.61	3222.09	0.117994
DDB_G0293038	1033.56	2.89063	0.3089	9.35782	8.14e-21	1.41e-19	1573.09	2725.36	2149.22	282.485	276.27	310.605	289.787	0.118813
DDB_G0281811	1180.36	2.88871	0.566736	5.09709	3.45e-07	1.68e-06	3766.03	1141.71	2453.87	304.93	316.755	372.375	331.353	0.118968
DDB_G0269328	131.89	2.88952	0.574197	5.03228	4.85e-07	2.31e-06	411.503	136.794	274.148	35.5941	45.3778	30.183	37.0516	0.11906
DDB_G0269452	71.7679	2.88951	0.52766	5.47608	4.35e-08	2.37e-07	161.476	136.794	149.135	21.3111	28.0274	11.2309	20.1898	0.119237
DDB_G0286409	50.4798	2.87891	0.538115	5.35	8.8e-08	4.64e-07	67.7156	142.055	104.886	17.2302	15.5708	9.82704	14.2094	0.119311
DDB_G0282633	258.48	2.87087	0.268267	10.7015	1e-26	2.53e-25	557.352	515.609	536.48	75.269	57.8344	86.3376	73.147	0.119986
DDB_G0284779	154.813	2.87693	0.50387	5.70967	1.13e-08	6.64e-08	458.383	184.146	321.264	34.9139	52.051	44.5726	43.8458	0.120089
DDB_G0288683	464.935	2.86815	0.348904	8.22046	2.03e-16	2.51e-15	734.454	1194.32	964.386	134.215	104.102	157.584	131.967	0.120369
DDB_G0277887	143.811	2.8614	0.511676	5.59221	2.24e-08	1.27e-07	406.294	189.407	297.851	34.9139	56.4998	31.9379	41.1172	0.121301
DDB_G0290327	569.749	2.84919	0.753777	3.77989	0.000156898	0.000503736	2005.42	352.508	1178.97	182.051	164.161	144.598	163.603	0.121858
DDB_G0293376	462.205	2.84775	0.201533	14.1304	2.47e-45	1.43e-43	823.006	1089.09	956.049	123.786	137.913	137.228	132.975	0.122105
DDB_G0288319	862.458	2.84263	0.251417	11.3064	1.22e-29	3.68e-28	2161.69	1404.77	1783.23	246.438	244.239	255.152	248.61	0.122357
DDB_G0291752	187.323	2.83412	0.337603	8.39482	4.67e-17	6.12e-16	489.636	284.111	386.874	56.225	59.6139	47.0294	54.2894	0.12306
DDB_G0282359	8576.81	2.8309	0.372159	7.6067	2.81e-14	2.87e-13	11678.3	23739.1	17708.7	2382.99	2644.81	2438.86	2488.89	0.123227
DDB_G0269338	93.5972	2.83274	0.539024	5.25531	1.48e-07	7.59e-07	286.489	99.965	193.227	23.5782	28.4723	29.4811	27.1772	0.123306
DDB_G0281209	92.5373	2.81434	0.481228	5.84824	4.97e-09	3.05e-08	218.774	163.101	190.937	36.2742	16.4606	28.0773	26.9373	0.123637
DDB_G0291237	3520.2	2.82455	0.633419	4.45921	8.23e-06	3.3e-05	11621	2904.25	7262.65	949.931	960.941	1164.86	1025.24	0.123704
DDB_G0278125	469.003	2.82181	0.340921	8.27704	1.26e-16	1.6e-15	1156.37	778.675	967.525	152.352	101.433	156.18	136.655	0.123761
DDB_G0276479	154.822	2.81372	0.31475	8.93955	3.91e-19	5.97e-18	343.787	294.634	319.21	54.8647	45.3778	35.4475	45.23	0.124108
DDB_G0288755	679.915	2.81863	0.34674	8.12896	4.33e-16	5.2e-15	1119.91	1683.62	1401.77	174.343	165.495	256.205	198.681	0.124141
DDB_G0288697	540.207	2.81838	0.267821	10.5234	6.74e-26	1.61e-24	869.886	1357.42	1113.65	148.951	155.263	169.516	157.91	0.124186
DDB_G0293834	1141.84	2.81778	0.252825	11.1452	7.56e-29	2.19e-27	2760.71	1946.69	2353.7	297.675	322.983	381.149	333.936	0.124249
DDB_G0284035	11561.7	2.81637	0.294679	9.55739	1.21e-21	2.24e-20	29612.6	18046.3	23829.4	3006.22	3648.02	3495.27	3383.17	0.124324
DDB_G0295681	383.806	2.8138	0.623874	4.5102	6.48e-06	2.64e-05	1244.93	336.724	790.825	128.773	117.003	91.602	112.46	0.124501
DDB_G0292116	674.422	2.80332	0.331997	8.44381	3.07e-17	4.09e-16	1802.28	973.343	1387.81	197.694	196.637	202.156	198.829	0.125315
DDB_G0280187	3194.24	2.79951	0.22386	12.5056	6.96e-36	2.75e-34	5443.3	7697.3	6570.3	998.901	867.961	963.752	943.538	0.125573
DDB_G0278105	317.693	2.79465	0.472362	5.91634	3.29e-09	2.07e-08	932.392	373.553	652.973	88.8718	107.661	85.9866	94.1731	0.126044
DDB_G0349042	166.676	2.78951	0.428725	6.50652	7.69e-11	5.66e-10	406.294	278.85	342.572	53.7312	32.0314	62.4719	49.4115	0.126055
DDB_G0268848	212.863	2.79593	0.271516	10.2975	7.23e-25	1.64e-23	395.876	478.78	437.328	58.0387	76.5194	55.1016	63.2199	0.126301
DDB_G0348868	67.6905	2.78975	0.546424	5.10546	3.3e-07	1.62e-06	72.9245	205.191	139.058	18.1371	18.685	23.5147	20.1123	0.126357
DDB_G0285343	143.788	2.78615	0.338505	8.23075	1.86e-16	2.33e-15	375.04	215.714	295.377	45.7962	37.8148	44.5726	42.7279	0.126375
DDB_G0284433	1835.82	2.78806	0.814836	3.42162	0.000622499	0.00174749	6615.3	925.991	3770.64	524.162	583.683	529.958	545.934	0.126474
DDB_G0280047	143.837	2.78505	0.35837	7.77141	7.76e-15	8.3e-14	364.623	226.237	295.43	43.529	34.2558	50.5391	42.7746	0.126476
DDB_G0278651	58.4585	2.79242	0.752129	3.71268	0.000205072	0.000636913	187.52	52.6131	120.067	10.4288	16.4606	25.2695	17.3863	0.126489
DDB_G0291474	128.576	2.78137	0.331368	8.39359	4.72e-17	6.18e-16	328.16	199.93	264.045	43.0756	33.8109	37.9043	38.2636	0.126571
DDB_G0279751	137.825	2.78318	0.306896	9.06879	1.2e-19	1.9e-18	218.774	347.247	283.01	44.4359	41.8187	36.8514	41.0353	0.126634
DDB_G0274311	181.144	2.78361	0.208996	13.3189	1.8e-40	9.01e-39	348.996	394.599	371.797	51.464	52.051	58.6113	54.0421	0.126907
DDB_G0279943	360.462	2.77989	0.377198	7.36985	1.71e-13	1.64e-12	937.601	541.915	739.758	131.721	105.437	85.6356	107.598	0.12698
DDB_G0280117	148.068	2.77655	0.294938	9.414	4.78e-21	8.41e-20	255.236	352.508	303.872	50.5572	44.488	37.5533	44.1995	0.126984
DDB_G0277179	135.222	2.77284	0.230393	12.0352	2.32e-33	8.26e-32	281.28	273.588	277.434	41.9421	36.4802	42.8178	40.4133	0.127147
DDB_G0275591	654.21	2.77799	0.569442	4.87844	1.07e-06	4.87e-06	2010.63	673.448	1342.04	226.487	217.991	142.492	195.657	0.12724
DDB_G0292642	660.97	2.77743	0.213714	12.996	1.29e-38	5.98e-37	1375.15	1336.37	1355.76	179.784	178.397	235.147	197.776	0.127307
DDB_G0288651	494.269	2.77654	0.237645	11.6836	1.55e-31	5.08e-30	859.468	1168.01	1013.74	137.842	137.913	168.113	147.956	0.127362
DDB_G0288065	19761.9	2.77549	0.480341	5.77817	7.55e-09	4.53e-08	58855.3	22197.5	40526.4	5367.22	6291.94	6097.33	5918.83	0.127437
DDB_G0276259	173.32	2.76733	0.527407	5.24705	1.55e-07	7.92e-07	526.098	184.146	355.122	59.1723	48.047	49.1352	52.1182	0.127979
DDB_G0270056	183.167	2.76272	0.430717	6.41423	1.42e-10	1.01e-09	229.191	520.87	375.031	52.3709	53.3856	60.0151	55.2572	0.128419
DDB_G0284693	676.342	2.76223	0.416121	6.63805	3.18e-11	2.45e-10	859.468	1909.86	1384.66	184.545	209.538	218.301	204.128	0.12848
DDB_G0288301	86.8608	2.76167	0.313822	8.80013	1.37e-18	2.02e-17	218.774	136.794	177.784	26.0721	26.6928	25.9715	26.2454	0.128636
DDB_G0285953	69.0333	2.74522	0.363979	7.54225	4.62e-14	4.65e-13	171.894	110.488	141.191	24.2584	19.5747	18.9521	20.9284	0.129093
DDB_G0284045	59.9283	2.75379	0.833782	3.30276	0.000957366	0.00258182	213.565	31.5679	122.566	18.1371	16.0157	20.356	18.1696	0.129104
DDB_G0272718	4018.95	2.75053	0.294479	9.34033	9.6e-21	1.65e-19	6719.48	9712.39	8215.93	1012.5	1174.93	1475.46	1220.96	0.129382
DDB_G0277533	134.401	2.74797	0.262893	10.4528	1.42e-25	3.34e-24	296.907	252.543	274.725	44.2092	43.5982	34.7456	40.851	0.129449
DDB_G0288117	72.9748	2.75959	0.40066	6.88762	5.67e-12	4.71e-11	166.685	131.533	149.109	19.044	29.3621	18.2502	22.2188	0.129686
DDB_G0269776	68.9791	2.74528	0.64156	4.27907	1.88e-05	7.07e-05	223.983	57.8745	140.928	22.218	20.4645	20.356	21.0128	0.129756
DDB_G0277381	479.36	2.73971	0.507331	5.40023	6.66e-08	3.56e-07	515.681	1441.6	978.64	139.202	137.468	162.848	146.506	0.130211
DDB_G0282143	19698	2.73961	0.463732	5.90774	3.47e-09	2.17e-08	22747.2	57679.8	40213.5	5565.37	5907.56	6590.08	6021	0.130227
DDB_G0276441	26913.2	2.7374	0.411566	6.65117	2.91e-11	2.24e-10	75341.5	34514.2	54927.8	7173.68	8726.77	8809.94	8236.79	0.130402
DDB_G0286805	287.063	2.73423	0.249422	10.9623	5.8e-28	1.58e-26	697.992	473.518	585.755	91.1389	81.413	91.2511	87.9344	0.130527
DDB_G0279407	1392.32	2.73526	0.131762	20.7591	1.01e-95	1.7e-93	2677.37	3004.21	2840.79	410.125	413.294	456.606	426.675	0.130583
DDB_G0271376	593.133	2.72906	0.142263	19.1832	5.11e-82	7.23e-80	1281.39	1136.44	1208.92	172.983	184.625	190.223	182.61	0.13123
DDB_G0268350	112.885	2.72519	0.398807	6.83336	8.29e-12	6.75e-11	291.698	168.362	230.03	38.5413	39.1494	26.6734	34.7881	0.131366
DDB_G0287307	212.724	2.72559	0.510863	5.33528	9.54e-08	5.01e-07	640.694	226.237	433.465	62.573	66.732	67.3854	65.5635	0.131382
DDB_G0286537	59.0568	2.70964	0.368302	7.35713	1.88e-13	1.79e-12	135.431	105.226	120.329	21.7645	16.0157	16.8464	18.2089	0.131436
DDB_G0278229	507.621	2.72323	0.487559	5.58544	2.33e-08	1.32e-07	1510.58	557.699	1034.14	158.246	152.594	158.987	156.609	0.131522
DDB_G0279797	584.822	2.72187	0.493775	5.51238	3.54e-08	1.96e-07	1677.26	705.016	1191.14	142.376	168.165	231.286	180.609	0.131663
DDB_G0290253	438.027	2.71836	0.271597	10.0088	1.39e-23	2.88e-22	1005.32	778.675	891.996	138.069	109.44	158.636	135.382	0.131774
DDB_G0291127	11931.4	2.71196	0.354392	7.65242	1.97e-14	2.03e-13	16981	31562.6	24271.8	3202.11	3743.67	4167.72	3704.5	0.132415
DDB_G0285361	561.375	2.70096	0.642011	4.20703	2.59e-05	9.5e-05	1833.53	447.212	1140.37	187.719	176.617	161.795	175.377	0.133291
DDB_G0292130	367.836	2.69588	0.534099	5.04754	4.48e-07	2.15e-06	1119.91	373.553	746.733	124.919	116.559	104.237	115.238	0.133692
DDB_G0277505	66.8017	2.69637	0.875781	3.07882	0.00207822	0.00519462	239.609	31.5679	135.589	17.0035	20.9094	24.9186	20.9438	0.133799
DDB_G0288091	147.099	2.70021	0.397366	6.79527	1.08e-11	8.72e-11	265.654	331.463	298.558	40.8085	63.173	34.3946	46.1254	0.133819
DDB_G0286271	471.709	2.69014	0.85882	3.13237	0.00173404	0.00441224	1703.31	210.453	956.881	157.339	133.019	154.425	148.261	0.134156
DDB_G0279985	1774.56	2.68962	0.446525	6.02345	1.71e-09	1.11e-08	5063.05	2136.09	3599.57	638.879	516.061	518.727	557.889	0.13419
DDB_G0293476	375.287	2.69202	0.211413	12.7335	3.85e-37	1.62e-35	859.468	662.926	761.197	106.782	120.562	126.699	118.014	0.134228
DDB_G0268966	380.436	2.68854	0.243094	11.0597	1.97e-28	5.56e-27	880.303	662.926	771.614	115.397	106.326	137.228	119.65	0.134248
DDB_G0280225	192.741	2.68715	0.478052	5.62103	1.9e-08	1.08e-07	218.774	562.961	390.867	60.986	56.0549	64.9287	60.6565	0.134337
DDB_G0291864	45104.2	2.66959	0.490686	5.44054	5.31e-08	2.88e-07	132561	49935.1	91248.2	12124.4	15580.1	15320.4	14341.6	0.135824
DDB_G0274547	151.227	2.67198	0.287294	9.30054	1.4e-20	2.36e-19	375.04	236.759	305.9	45.7962	51.1612	47.3804	48.1126	0.135906
DDB_G0278495	1349.86	2.66776	0.410524	6.49842	8.12e-11	5.95e-10	3766.03	1694.14	2730.09	397.883	451.108	440.111	429.701	0.13599
DDB_G0291928	1982.95	2.66711	0.249952	10.6705	1.4e-26	3.49e-25	4490.07	3530.34	4010.21	666.085	717.591	510.655	631.444	0.136039
DDB_G0267524	623.29	2.66657	0.63994	4.1669	3.09e-05	0.000112111	2026.26	494.564	1260.41	184.545	203.31	207.772	198.542	0.136085
DDB_G0286953	1302.31	2.66561	0.308283	8.64663	5.3e-18	7.45e-17	2125.23	3141	2633.12	337.35	407.51	500.477	415.112	0.136181
DDB_G0273989	228.585	2.6606	0.64989	4.09392	4.24e-05	0.00015034	744.872	178.885	461.878	73.9087	72.9603	72.2989	73.056	0.13657
DDB_G0276791	701.368	2.65799	0.312952	8.49328	2.01e-17	2.71e-16	1791.86	1041.74	1416.8	232.608	201.976	238.657	224.414	0.136736
DDB_G0282905	190.095	2.65822	0.461682	5.75769	8.53e-09	5.07e-08	546.934	220.975	383.955	60.7593	64.9525	56.8564	60.8561	0.136813
DDB_G0289675	455.23	2.65839	0.46043	5.7737	7.76e-09	4.64e-08	1297.02	541.915	919.465	122.425	162.826	151.968	145.74	0.136819
DDB_G0268662	358.349	2.6553	0.448597	5.91912	3.24e-09	2.03e-08	1020.94	426.166	723.555	108.142	109.44	127.05	114.878	0.137015
DDB_G0270990	1871.11	2.65378	0.244895	10.8364	2.31e-27	6.14e-26	4260.88	3293.58	3777.23	607.82	693.123	500.126	600.356	0.137143
DDB_G0274871	274.87	2.64656	0.192999	13.7128	8.51e-43	4.54e-41	614.65	494.564	554.607	94.0862	85.417	85.6356	88.3796	0.137452
DDB_G0291824	140.229	2.64391	0.516639	5.11752	3.1e-07	1.52e-06	239.609	326.201	282.905	53.051	24.0235	58.2603	45.1116	0.137528
DDB_G0293300	651.123	2.64846	0.486827	5.44026	5.32e-08	2.88e-07	1916.87	710.277	1313.58	220.593	199.751	208.123	209.489	0.137544
DDB_G0287621	957.432	2.64369	0.463516	5.70355	1.17e-08	6.87e-08	2755.51	1104.88	1930.19	296.542	347.006	283.229	308.926	0.137968
DDB_G0269892	1794.04	2.64149	0.546035	4.83759	1.31e-06	5.92e-06	5490.18	1741.5	3615.84	532.324	578.344	627.878	579.515	0.138133
DDB_G0289543	258.503	2.63531	0.275355	9.57058	1.06e-21	1.98e-20	604.232	436.689	520.46	74.1354	79.1886	98.2704	83.8648	0.138774
DDB_G0275161	390.874	2.63241	0.595095	4.4235	9.71e-06	3.84e-05	463.592	1110.14	786.865	155.979	154.818	69.8422	126.88	0.138857
DDB_G0287183	338.185	2.62951	0.865146	3.03938	0.00237062	0.00583301	1213.67	147.317	680.495	103.835	106.771	119.328	109.978	0.13913
DDB_G0277501	4524.13	2.62131	0.65664	3.992	6.55e-05	0.000224176	14782.8	3404.07	9093.46	1351.21	1527.72	1554.78	1477.9	0.139803
DDB_G0281677	20596.7	2.61692	0.25309	10.3399	4.65e-25	1.07e-23	33550.5	49198.6	41374.5	5962.35	7407.7	6864.54	6744.86	0.140169
DDB_G0276709	75.7013	2.61394	0.461666	5.66197	1.5e-08	8.64e-08	104.178	199.93	152.054	28.5659	27.5826	18.2502	24.7996	0.140227
DDB_G0267508	71.8983	2.61347	0.5792	4.5122	6.42e-06	2.62e-05	67.7156	220.975	144.345	21.7645	24.4684	24.5676	23.6002	0.140523
DDB_G0278027	200.37	2.61018	0.52174	5.00284	5.65e-07	2.68e-06	599.023	205.191	402.107	63.7066	65.8422	68.0873	65.8787	0.140771
DDB_G0291364	1483.96	2.60555	0.232352	11.2138	3.49e-29	1.02e-27	2406.51	3546.13	2976.32	471.338	489.368	506.443	489.05	0.141125
DDB_G0276765	39521.6	2.60448	0.532289	4.89299	9.93e-07	4.55e-06	119258	39254.7	79256.2	11662.4	13717.9	13715.4	13031.9	0.141209
DDB_G0279225	174.579	2.60336	0.432843	6.01456	1.8e-09	1.17e-08	489.636	210.453	350.044	58.4922	56.0549	58.2603	57.6024	0.141305
DDB_G0278457	475.396	2.6	0.16844	15.4358	9.41e-54	6.97e-52	932.392	973.343	952.868	152.578	144.586	174.079	157.081	0.141521
DDB_G0284359	382.897	2.59727	0.6827	3.80442	0.000142139	0.000459606	1260.55	273.588	767.071	117.891	127.681	134.771	126.781	0.141837
DDB_G0275527	682.391	2.59316	0.155558	16.67	2.17e-62	1.96e-60	1302.22	1431.08	1366.65	228.754	205.979	243.921	226.218	0.142019
DDB_G0277775	199.696	2.59109	0.376408	6.88374	5.83e-12	4.84e-11	526.098	273.588	399.843	75.7224	60.9486	62.1209	66.264	0.142165
DDB_G0283629	1079.22	2.59039	0.218225	11.8703	1.69e-32	5.72e-31	2526.31	1794.11	2160.21	381.106	340.778	353.773	358.552	0.142353
DDB_G0292886	137.083	2.58931	0.388325	6.66789	2.6e-11	2.02e-10	364.623	184.146	274.384	50.5572	45.3778	40.712	45.549	0.14237
DDB_G0291263	285.566	2.59086	0.632012	4.09939	4.14e-05	0.000147071	906.348	236.759	571.553	81.1635	94.7594	108.799	94.9074	0.142405
DDB_G0286241	659.979	2.58846	0.624794	4.1429	3.43e-05	0.000123422	2093.98	547.177	1320.58	229.661	242.015	187.065	219.58	0.14257
DDB_G0283009	186.881	2.58671	0.343907	7.52155	5.41e-14	5.4e-13	484.427	263.066	373.747	59.6257	67.6218	59.6642	62.3039	0.142882
DDB_G0293286	66.722	2.5961	0.345401	7.51618	5.64e-14	5.61e-13	151.058	115.749	133.403	19.4974	26.2479	21.0579	22.2677	0.143043
DDB_G0276821	14332.6	2.5809	0.160068	16.1238	1.74e-58	1.42e-56	29154.2	28142.8	28648.5	4152.49	5018.25	5195.34	4788.69	0.143215
DDB_G0287257	1883.83	2.5776	0.325335	7.92293	2.32e-15	2.6e-14	4854.69	2672.75	3763.72	594.897	643.296	653.498	630.564	0.143496
DDB_G0295849	873.454	2.57369	0.54694	4.70562	2.53e-06	1.1e-05	2609.66	878.64	1744.15	259.587	260.7	358.687	292.991	0.143825
DDB_G0271236	97.3066	2.56822	0.557436	4.6072	4.08e-06	1.72e-05	93.7601	294.634	194.197	34.0071	31.1416	32.9908	32.7131	0.144168
DDB_G0269172	322.285	2.56176	0.476895	5.37175	7.8e-08	4.14e-07	927.183	357.769	642.476	105.875	102.322	118.275	108.824	0.144848
DDB_G0290837	76.1218	2.5581	0.36375	7.03256	2.03e-12	1.74e-11	187.52	115.749	151.635	23.5782	23.5786	30.183	25.78	0.145309
DDB_G0279345	233.477	2.55568	0.436205	5.85889	4.66e-09	2.87e-08	635.485	294.634	465.059	88.4184	84.9721	63.8758	79.0887	0.145344
DDB_G0288461	1610.04	2.55553	0.338982	7.53883	4.74e-14	4.77e-13	4156.7	2257.1	3206.9	550.234	495.151	591.026	545.471	0.145367
DDB_G0284415	1254.29	2.55227	0.249362	10.2352	1.38e-24	3.06e-23	1979.38	3014.73	2497.06	404.911	445.325	427.125	425.787	0.145676
DDB_G0273743	4400.07	2.54972	0.532919	4.78444	1.71e-06	7.62e-06	4307.76	13205.9	8756.83	1411.97	1472.55	1602.16	1495.56	0.145874
DDB_G0283455	143.823	2.54403	0.543294	4.6826	2.83e-06	1.23e-05	140.64	431.428	286.034	51.0106	47.6022	48.4333	49.0153	0.146293
DDB_G0283857	473.177	2.5441	0.330414	7.69974	1.36e-14	1.43e-13	1218.88	662.926	940.904	161.42	166.83	155.829	161.36	0.146389
DDB_G0272787	53.9705	2.55985	0.37265	6.86932	6.45e-12	5.33e-11	109.387	105.226	107.307	15.1898	21.7991	18.2502	18.4131	0.146461
DDB_G0287459	1363.75	2.54044	0.319337	7.95534	1.79e-15	2.03e-14	3479.54	1941.43	2710.48	454.788	451.998	491.001	465.929	0.146684
DDB_G0292774	65.6293	2.54173	0.743292	3.41955	0.000627239	0.00176035	218.774	42.0905	130.432	21.3111	24.9133	21.0579	22.4274	0.146719
DDB_G0281249	60.8908	2.52931	0.823061	3.07306	0.00211877	0.00528758	31.2534	210.453	120.853	21.7645	19.5747	21.4089	20.9161	0.147536
DDB_G0284571	390.783	2.5312	0.326808	7.74521	9.54e-15	1.01e-13	645.903	904.946	775.425	119.478	171.279	112.309	134.355	0.147679
DDB_G0275669	205.567	2.52545	0.382289	6.60614	3.94e-11	3e-10	531.307	284.111	407.709	77.9895	76.5194	57.9093	70.8061	0.14797
DDB_G0283727	392.395	2.52549	0.295866	8.53591	1.39e-17	1.9e-16	640.694	915.469	778.081	111.77	134.354	159.689	135.271	0.148104
DDB_G0291370	475.065	2.51795	0.373212	6.7467	1.51e-11	1.2e-10	666.739	1215.36	941.051	152.125	199.306	141.79	164.407	0.148723
DDB_G0274215	196.035	2.51344	0.473411	5.30922	1.1e-07	5.73e-07	223.983	552.438	388.21	71.8683	57.8344	74.0538	67.9188	0.148903
DDB_G0278481	687.615	2.51435	0.352241	7.13815	9.46e-13	8.37e-12	1797.07	925.991	1361.53	231.702	236.231	247.08	238.338	0.148973
DDB_G0281291	208.109	2.51401	0.571471	4.39919	1.09e-05	4.26e-05	203.147	620.835	411.991	62.1196	89.8658	64.5777	72.1877	0.149093
DDB_G0292112	466.844	2.50814	0.690928	3.6301	0.000283309	0.000856991	1526.21	320.94	923.573	158.246	156.153	172.675	162.358	0.14951
DDB_G0278837	80.7221	2.50215	0.375901	6.65643	2.81e-11	2.17e-10	156.267	163.101	159.684	27.8858	20.9094	35.4475	28.0809	0.149554
DDB_G0283401	1124.57	2.4978	0.435502	5.73544	9.73e-09	5.76e-08	1317.85	3125.22	2221.54	416.7	372.809	390.274	393.261	0.150398
DDB_G0291608	545.449	2.49561	0.343959	7.25555	4e-13	3.69e-12	838.632	1315.33	1076.98	149.178	193.523	230.584	191.095	0.150697
DDB_G0282061	329.185	2.49455	0.669878	3.72388	0.000196182	0.00061171	1015.73	284.111	649.923	123.786	148.59	73.7028	115.359	0.150741
DDB_G0294553	269.742	2.49026	0.679635	3.66412	0.000248193	0.000758879	869.886	194.669	532.277	106.782	92.0902	85.2847	94.719	0.151068
DDB_G0279189	22102.8	2.48797	0.212094	11.7305	8.89e-32	2.94e-30	49463.7	37734.1	43598.9	6791.89	8322.81	8201.72	7772.14	0.151294
DDB_G0288273	36108.2	2.48529	0.277646	8.95131	3.51e-19	5.39e-18	86483.3	55912	71197.6	11078.1	13940.8	13126.8	12715.2	0.151529
DDB_G0272194	69.244	2.4854	0.676591	3.67342	0.000239325	0.000733797	52.089	220.975	136.532	24.2584	27.1377	21.7599	24.3853	0.151539
DDB_G0292858	603.316	2.48538	0.267056	9.3066	1.32e-20	2.24e-19	1463.7	915.469	1189.58	209.71	212.208	215.493	212.47	0.151542
DDB_G0276141	10613.4	2.48496	0.503654	4.93387	8.06e-07	3.75e-06	30946	10906.7	20926.4	3484.36	3768.58	3961.35	3738.1	0.151558
DDB_G0279367	271.848	2.48205	0.340526	7.28889	3.13e-13	2.92e-12	697.992	373.553	535.773	95.6732	91.6453	100.376	95.8982	0.151817
DDB_G0286121	84.9529	2.4786	0.349319	7.09553	1.29e-12	1.13e-11	192.729	142.055	167.392	28.5659	24.9133	36.5004	29.9932	0.151952
DDB_G0292256	241.143	2.47907	0.600254	4.13003	3.63e-05	0.000130161	739.663	210.453	475.058	84.791	74.295	96.5156	85.2005	0.152074
DDB_G0283655	93.0397	2.46611	0.301077	8.19096	2.59e-16	3.17e-15	197.938	168.362	183.15	38.0879	32.0314	28.7792	32.9662	0.152539
DDB_G0276347	287.051	2.472	0.255494	9.67538	3.84e-22	7.31e-21	666.739	462.996	564.867	106.329	108.996	90.1982	101.841	0.152752
DDB_G0269590	167.486	2.46968	0.265036	9.31829	1.18e-20	2.02e-19	375.04	284.111	329.576	58.4922	52.051	67.7364	59.4265	0.152766
DDB_G0277843	1627.37	2.47033	0.479632	5.15047	2.6e-07	1.29e-06	4651.54	1752.02	3201.78	576.533	541.864	614.892	577.763	0.152866
DDB_G0272082	194.324	2.46424	0.389209	6.3314	2.43e-10	1.7e-09	375.04	389.337	382.189	75.269	44.9329	87.0395	69.0804	0.15308
DDB_G0291181	55.8177	2.46216	0.462798	5.32015	1.04e-07	5.42e-07	140.64	78.9197	109.78	20.631	14.681	24.2166	19.8429	0.153082
DDB_G0275257	150.591	2.45842	0.206717	11.8927	1.29e-32	4.43e-31	286.489	305.156	295.823	55.0915	54.2754	51.9429	53.7699	0.153807
DDB_G0269100	26576.2	2.45558	0.273616	8.97456	2.84e-19	4.39e-18	61298.3	43048.1	52173.2	7922.29	9545.79	11066.6	9511.58	0.154197
DDB_G0268264	6179.3	2.45131	0.185828	13.1912	9.85e-40	4.81e-38	13428.5	10817.3	12122.9	1979.44	2262.21	2409.03	2216.89	0.154597
DDB_G0272841	532.847	2.45095	0.360994	6.78947	1.13e-11	9.06e-11	1385.57	705.016	1045.29	181.371	189.074	203.209	191.218	0.154643
DDB_G0286459	454.271	2.4472	0.453593	5.39515	6.85e-08	3.66e-07	1265.76	515.609	890.685	160.06	153.039	176.887	163.328	0.154959
DDB_G0274441	296.18	2.44533	0.31695	7.71519	1.21e-14	1.27e-13	661.53	499.825	580.677	104.742	83.1926	131.612	106.515	0.155001
DDB_G0276099	1173.67	2.44393	0.543747	4.4946	6.97e-06	2.83e-05	3484.75	1115.4	2300.07	429.849	455.112	383.255	422.739	0.155258
DDB_G0268816	180.204	2.4368	0.370936	6.56932	5.05e-11	3.8e-10	432.338	273.588	352.963	72.5484	48.4919	74.0538	65.0314	0.155579
DDB_G0272833	201.334	2.43596	0.668675	3.64297	0.000269513	0.000817724	625.067	163.101	394.084	63.7066	58.2793	96.5156	72.8338	0.155988
DDB_G0283033	53.3621	2.43748	0.666884	3.65502	0.000257161	0.00078348	156.267	52.6131	104.44	21.0844	24.9133	11.9328	19.3102	0.156042
DDB_G0289393	8016.54	2.43425	0.21541	11.3005	1.3e-29	3.91e-28	18069.7	13305.9	15687.8	3027.76	2597.21	3082.18	2902.38	0.156125
DDB_G0270786	62.964	2.41374	0.383313	6.29704	3.03e-10	2.11e-09	119.805	126.272	123.038	25.1652	16.9054	26.6734	22.9147	0.157001
DDB_G0283679	1083.49	2.4251	0.110613	21.9241	1.53e-106	3.25e-104	2224.2	2009.82	2117.01	388.361	406.175	388.87	394.469	0.157066
DDB_G0275353	237.935	2.42339	0.486013	4.98628	6.16e-07	2.9e-06	671.948	257.804	464.876	88.6451	76.5194	94.7607	86.6417	0.157097
DDB_G0293216	89.8024	2.41934	0.368658	6.56256	5.29e-11	3.97e-10	187.52	163.101	175.31	35.8208	38.7046	23.8657	32.797	0.157596
DDB_G0292740	262.55	2.4192	0.255096	9.48347	2.46e-21	4.43e-20	619.859	405.121	512.49	92.0458	99.2082	96.5156	95.9232	0.157661
DDB_G0286057	5518.66	2.41619	0.284085	8.50518	1.81e-17	2.45e-16	12574.3	8965.28	10769.8	1630.07	2043.78	2379.9	2017.92	0.157801
DDB_G0276383	1225.56	2.41402	0.586445	4.11637	3.85e-05	0.000137488	3713.94	1068.05	2390.99	498.09	394.609	453.097	448.598	0.15798
DDB_G0276977	299.414	2.40894	0.246324	9.77956	1.38e-22	2.67e-21	578.187	589.267	583.727	120.612	120.562	88.4434	109.873	0.158409
DDB_G0275149	474.134	2.40873	0.543497	4.43192	9.34e-06	3.7e-05	1395.98	452.473	924.229	180.237	186.85	155.127	174.071	0.158492
DDB_G0288141	83.2696	2.40056	0.332121	7.22797	4.9e-13	4.48e-12	203.147	121.01	162.079	31.2865	32.4762	28.4282	30.7303	0.159382
DDB_G0294048	364.826	2.3935	0.246271	9.71899	2.5e-22	4.81e-21	645.903	773.413	709.658	131.494	114.334	158.987	134.939	0.159767
DDB_G0271890	256.419	2.3909	0.641693	3.72593	0.000194599	0.000607118	791.752	205.191	498.472	87.2848	82.7477	115.117	95.0497	0.160145
DDB_G0288123	4056.53	2.38724	0.157134	15.1924	3.97e-52	2.87e-50	8464.46	7297.44	7880.95	1376.15	1645.61	1498.97	1506.91	0.160517
DDB_G0279167	318.802	2.38547	0.378018	6.31046	2.78e-10	1.94e-09	823.006	415.644	619.325	128.773	104.102	122.487	118.454	0.160555
DDB_G0288563	4086.37	2.38363	0.27091	8.79861	1.39e-18	2.04e-17	9751.05	6118.91	7934.98	1432.83	1513.93	1615.14	1520.63	0.160818
DDB_G0282369	2384.93	2.37831	0.463423	5.13205	2.87e-07	1.42e-06	2604.45	6650.3	4627.37	884.184	843.048	942.694	889.975	0.161305
DDB_G0282847	374.622	2.37841	0.300083	7.92584	2.27e-15	2.54e-14	911.557	541.915	726.736	134.215	151.704	133.718	139.879	0.161408
DDB_G0269400	199.252	2.37131	0.690091	3.43622	0.000589882	0.00166658	635.485	136.794	386.14	68.4676	78.2989	77.2125	74.6596	0.162022
DDB_G0286123	528.526	2.37059	0.386475	6.13388	8.58e-10	5.72e-09	1385.57	662.926	1024.25	209.71	198.416	186.012	198.046	0.162029
DDB_G0280813	456.448	2.36608	0.185557	12.7512	3.07e-37	1.3e-35	974.063	794.458	884.261	181.824	155.708	176.185	171.239	0.162235
DDB_G0269710	165.321	2.36478	0.493554	4.79134	1.66e-06	7.38e-06	177.102	462.996	320.049	59.1723	71.1808	56.1545	62.1692	0.162654
DDB_G0285239	897.055	2.35611	0.44136	5.3383	9.38e-08	4.93e-07	2448.18	1020.7	1734.44	320.12	332.325	363.951	338.799	0.163415
DDB_G0276663	261.222	2.35414	0.188592	12.4828	9.27e-36	3.6e-34	531.307	478.78	505.043	104.742	101.433	89.8472	98.6739	0.163444
DDB_G0280823	37967	2.35309	0.398587	5.90359	3.56e-09	2.22e-08	99693.1	47057.2	73375.1	12806.2	15062.3	15216.1	14361.5	0.163689
DDB_G0274115	302.587	2.35223	0.363333	6.47404	9.54e-11	6.93e-10	411.503	757.629	584.566	101.794	133.909	108.097	114.6	0.16391
DDB_G0295697	199.762	2.34871	0.590244	3.97922	6.91e-05	0.000235699	177.102	594.529	385.815	70.508	67.1769	89.4962	75.727	0.164074
DDB_G0280853	99.9838	2.34692	0.699257	3.3563	0.000789915	0.00216569	312.534	73.6584	193.096	48.5168	32.9211	32.2888	37.9089	0.164104
DDB_G0283911	73.1196	2.35107	0.405981	5.79108	6.99e-09	4.21e-08	171.894	110.488	141.191	28.7927	33.366	21.0579	27.7389	0.164204
DDB_G0282727	58.5113	2.34543	0.81259	2.88636	0.0038972	0.00917997	31.2534	194.669	112.961	24.7118	24.0235	17.8992	22.2115	0.16432
DDB_G0287403	296.675	2.3443	0.74011	3.1675	0.00153753	0.00394865	177.102	968.082	572.592	117.664	103.657	116.872	112.731	0.164493
DDB_G0295757	100.31	2.34839	0.260053	9.03044	1.71e-19	2.67e-18	213.565	173.623	193.594	37.6345	40.929	35.7985	38.1206	0.164515
DDB_G0271988	53.0661	2.34059	0.548401	4.26803	1.97e-05	7.38e-05	52.089	152.578	102.334	19.7241	22.6889	18.2502	20.2211	0.164996
DDB_G0270146	177.206	2.33981	0.760796	3.07547	0.00210171	0.00524856	578.187	105.226	341.707	54.4113	70.291	77.9144	67.5389	0.165033
DDB_G0281701	82.9188	2.34529	0.396171	5.91988	3.22e-09	2.03e-08	135.431	184.146	159.789	23.5782	39.1494	32.2888	31.6722	0.165424
DDB_G0289947	1233.45	2.33376	0.49351	4.72891	2.26e-06	9.87e-06	3463.92	1289.02	2376.47	438.691	436.872	538.732	471.432	0.165537
DDB_G0276425	429.528	2.33319	0.573144	4.07087	4.68e-05	0.000164859	1276.18	378.815	827.497	175.25	166.83	150.564	164.215	0.165587
DDB_G0295713	73.2879	2.33787	0.344302	6.79016	1.12e-11	9.02e-11	177.102	105.226	141.164	25.6187	29.3621	29.1302	28.037	0.165702
DDB_G0268060	816.798	2.33045	0.406951	5.7266	1.02e-08	6.05e-08	2125.23	1020.7	1572.96	324.201	261.145	352.721	312.689	0.165825
DDB_G0277205	2692.97	2.32822	0.189513	12.2853	1.09e-34	4.11e-33	5938.14	4430.03	5184.08	1051.73	985.409	1059.57	1032.23	0.166052
DDB_G0293546	280.955	2.32726	0.419789	5.54388	2.96e-08	1.66e-07	750.081	331.463	540.772	110.636	100.988	111.607	107.744	0.166139
DDB_G0293002	495.135	2.32331	0.137555	16.89	5.33e-64	5.07e-62	994.899	910.207	952.553	190.666	181.956	197.945	190.189	0.166432
DDB_G0278757	2144.03	2.32312	0.150413	15.4449	8.16e-54	6.09e-52	4417.14	3830.24	4123.69	768.786	806.567	897.419	824.258	0.166586
DDB_G0278721	7134.36	2.32078	0.278853	8.32259	8.61e-17	1.1e-15	17022.7	10412.1	13717.4	2738.48	2626.57	2871.95	2745.67	0.166777
DDB_G0290427	538.007	2.31999	0.47127	4.92285	8.53e-07	3.95e-06	1489.74	578.745	1034.24	197.694	225.554	198.296	207.181	0.16689
DDB_G0286611	152.736	2.31904	0.395088	5.86969	4.37e-09	2.7e-08	203.147	384.076	293.611	53.9579	51.6061	70.8951	58.8197	0.166897
DDB_G0269760	282.57	2.31221	0.748874	3.08759	0.00201787	0.00506326	921.975	163.101	542.538	105.649	111.22	110.905	109.258	0.167626
DDB_G0275925	85.9984	2.30473	0.316183	7.28921	3.12e-13	2.92e-12	166.685	163.101	164.893	35.3674	37.8148	27.0244	33.4022	0.168447
DDB_G0291834	3703.47	2.30332	0.271684	8.47793	2.29e-17	3.08e-16	8745.74	5455.98	7100.86	1520.8	1373.79	1421.06	1438.55	0.16846
DDB_G0268920	1142.88	2.30134	0.457533	5.02988	4.91e-07	2.34e-06	2776.34	1604.7	2190.52	329.415	368.361	635.599	444.458	0.168676
DDB_G0277075	2500.97	2.29655	0.259594	8.84669	9.02e-19	1.34e-17	3781.66	5797.97	4789.81	889.398	1028.56	1007.27	975.077	0.169141
DDB_G0268790	882.491	2.29499	0.230657	9.94976	2.53e-23	5.08e-22	1369.94	2009.82	1689.88	353.22	329.211	350.264	344.232	0.169229
DDB_G0290745	1188.5	2.29431	0.424398	5.40604	6.44e-08	3.45e-07	3167.01	1383.73	2275.37	428.716	460.451	502.583	463.916	0.169357
DDB_G0280699	234.798	2.29644	0.382703	6.00058	1.97e-09	1.27e-08	588.605	310.418	449.511	81.3903	108.996	84.5827	91.6562	0.169367
DDB_G0275537	1118.68	2.29411	0.331223	6.9262	4.32e-12	3.63e-11	1510.58	2772.71	2141.65	407.405	450.663	452.044	436.704	0.169373
DDB_G0271960	2234.33	2.29185	0.327789	6.99185	2.71e-12	2.31e-11	5531.85	3019.99	4275.92	830.906	908	880.924	873.277	0.169595
DDB_G0288835	91.5466	2.28137	0.586136	3.89222	9.93e-05	0.000328957	270.863	78.9197	174.891	36.0475	34.7006	37.2024	35.9835	0.170639
DDB_G0294040	135.692	2.28848	0.249058	9.18854	3.98e-20	6.5e-19	244.818	273.588	259.203	46.9298	58.7242	54.3997	53.3512	0.170694
DDB_G0281693	533.268	2.27416	0.665855	3.41539	0.000636899	0.0017852	1661.64	373.553	1017.6	213.111	211.318	206.719	210.383	0.171324
DDB_G0288133	22298.5	2.2653	0.258014	8.77977	1.64e-18	2.39e-17	51005.5	33972.3	42488.9	7860.17	9480.84	9173.54	8838.18	0.172193
DDB_G0291768	522.136	2.26323	0.571727	3.95858	7.54e-05	0.000255363	1536.62	452.473	994.549	199.735	207.759	214.089	207.194	0.172411
DDB_G0284369	188.691	2.26139	0.480313	4.70816	2.5e-06	1.09e-05	203.147	515.609	359.378	83.8841	75.1847	65.6306	74.8998	0.17247
DDB_G0285897	445.393	2.26145	0.628545	3.59791	0.000320789	0.000955185	1354.31	341.985	848.149	188.399	169.944	172.324	176.889	0.172568
DDB_G0274655	705.993	2.25873	0.626499	3.60532	0.000311771	0.000930591	604.232	2083.48	1343.86	286.34	201.086	354.826	280.751	0.172811
DDB_G0280445	199.959	2.25282	0.40537	5.55745	2.74e-08	1.54e-07	239.609	520.87	380.24	76.1758	77.854	85.2847	79.7715	0.173412
DDB_G0276083	79.8426	2.24849	0.298365	7.53603	4.84e-14	4.87e-13	161.476	142.055	151.766	31.0598	28.4723	36.1495	31.8939	0.173658
DDB_G0278785	95.057	2.24079	0.375253	5.97141	2.35e-09	1.5e-08	166.685	194.669	180.677	49.4236	32.9211	31.5869	37.9772	0.173686
DDB_G0276579	110.266	2.24808	0.267434	8.40611	4.24e-17	5.58e-16	177.102	242.02	209.561	46.0229	45.8226	40.3611	44.0689	0.173752
DDB_G0290405	61.955	2.24034	0.332094	6.7461	1.52e-11	1.21e-10	130.222	105.226	117.724	26.2988	21.3542	26.6734	24.7755	0.173863
DDB_G0282125	683.821	2.2478	0.700535	3.20868	0.00133344	0.00346889	2156.48	441.95	1299.22	260.041	256.696	303.936	273.558	0.173933
DDB_G0268104	2711.55	2.24516	0.217721	10.3121	6.21e-25	1.41e-23	6016.27	4282.71	5149.49	1036.99	1054.81	1166.96	1086.25	0.174198
DDB_G0276013	850.845	2.24473	0.251079	8.94035	3.88e-19	5.94e-18	1468.91	1762.54	1615.72	303.57	302.963	416.245	340.926	0.17424
DDB_G0268216	206.718	2.24091	0.258121	8.68162	3.9e-18	5.56e-17	432.338	352.508	392.423	81.8437	70.7359	96.1646	82.9147	0.174433
DDB_G0292024	169.767	2.23963	0.279239	8.02048	1.05e-15	1.23e-14	260.445	384.076	322.26	69.1477	60.0588	75.1067	68.1044	0.174463
DDB_G0276027	256.676	2.24172	0.219769	10.2004	1.98e-24	4.35e-23	463.592	510.348	486.97	91.1389	101.433	116.872	103.148	0.174792
DDB_G0284015	398.352	2.23859	0.227971	9.8196	9.27e-23	1.82e-21	895.93	615.574	755.752	165.048	154.818	160.391	160.086	0.174797
DDB_G0268030	225.168	2.23421	0.210544	10.6116	2.63e-26	6.46e-25	395.876	457.734	426.805	93.6328	97.8736	80.7221	90.7428	0.175332
DDB_G0280045	209.454	2.23275	0.497918	4.48417	7.32e-06	2.96e-05	583.396	210.453	396.924	82.9772	85.8618	84.5827	84.4739	0.175476
DDB_G0275861	334.079	2.23305	0.243099	9.18577	4.09e-20	6.66e-19	708.41	557.699	633.055	120.612	126.791	156.882	134.761	0.175513
DDB_G0280125	149.596	2.22765	0.43069	5.17229	2.31e-07	1.16e-06	171.894	394.599	283.246	55.7716	61.8383	63.8758	60.4952	0.175991
DDB_G0277137	110.32	2.22184	0.711988	3.12061	0.00180477	0.00457744	343.787	73.6584	208.723	53.7312	41.8187	38.6062	44.7187	0.176446
DDB_G0267530	3716.6	2.22171	0.13632	16.2977	1.02e-59	8.57e-58	6573.63	7486.85	7030.24	1394.52	1532.17	1595.84	1507.51	0.17657
DDB_G0288169	332.895	2.22122	0.413603	5.37042	7.86e-08	4.17e-07	869.886	389.337	629.611	126.506	138.358	140.386	135.083	0.17665
DDB_G0282021	124.246	2.22059	0.555602	3.99674	6.42e-05	0.000220217	354.205	115.749	234.977	54.1846	54.2754	42.8178	50.4259	0.176683
DDB_G0276897	427.188	2.22091	0.279491	7.94626	1.92e-15	2.18e-14	994.899	620.835	807.867	160.06	174.838	185.31	173.403	0.176712
DDB_G0282255	2634.95	2.21904	0.417794	5.31132	1.09e-07	5.67e-07	6854.91	3109.44	4982.17	983.711	1003.2	1223.47	1070.13	0.176813
DDB_G0289141	2621.01	2.21797	0.168847	13.136	2.05e-39	9.87e-38	5511.01	4398.46	4954.74	998.221	1065.49	1131.86	1065.19	0.176944
DDB_G0281031	293.165	2.21246	0.480868	4.60097	4.21e-06	1.77e-05	802.17	305.156	553.663	119.025	128.57	110.905	119.5	0.17752
DDB_G0273583	146.922	2.20777	0.25606	8.62207	6.58e-18	9.15e-17	286.489	268.327	277.408	59.399	51.6061	68.7893	59.9315	0.177659
DDB_G0270730	110.937	2.19723	0.366819	5.98995	2.1e-09	1.34e-08	234.4	184.146	209.273	55.9983	33.8109	46.3275	45.3789	0.1782
DDB_G0291486	617.343	2.20477	0.543282	4.05825	4.94e-05	0.000172757	1755.4	573.483	1164.44	233.742	234.897	289.196	252.611	0.178265
DDB_G0271668	8346.76	2.20418	0.274939	8.01699	1.08e-15	1.26e-14	12449.3	19035.4	15742.3	2950.23	3616.87	3681.98	3416.36	0.178319
DDB_G0269426	100.018	2.20999	0.29372	7.52414	5.31e-14	5.3e-13	161.476	215.714	188.595	35.5941	44.488	42.8178	40.9666	0.178456
DDB_G0275663	303.026	2.20211	0.711132	3.09662	0.0019574	0.00492384	953.228	189.407	571.318	126.053	118.338	128.102	124.164	0.17853
DDB_G0269274	66.5303	2.20725	0.450554	4.89897	9.63e-07	4.43e-06	171.894	78.9197	125.407	23.5782	31.5865	26.6734	27.2794	0.178663
DDB_G0275383	550.545	2.20017	0.247408	8.89288	5.95e-19	9.02e-18	823.006	1252.19	1037.6	215.605	231.338	230.584	225.842	0.178752
DDB_G0277765	61.2476	2.19815	0.443823	4.95277	7.32e-07	3.43e-06	72.9245	157.839	115.382	22.6714	24.0235	28.7792	25.158	0.17901
DDB_G0276327	229.432	2.19425	0.25178	8.71494	2.91e-18	4.17e-17	390.667	473.518	432.093	90.9122	81.8579	110.203	94.3245	0.179182
DDB_G0277861	4405.32	2.19325	0.35447	6.18741	6.12e-10	4.12e-09	10199	6387.24	8293.13	1474.55	1648.73	2317.08	1813.45	0.179433
DDB_G0273003	477.501	2.18982	0.493052	4.44137	8.94e-06	3.56e-05	1307.43	489.302	898.368	184.545	181.956	224.267	196.923	0.17979
DDB_G0295711	135.891	2.18866	0.747805	2.92678	0.00342494	0.00815685	432.338	78.9197	255.629	60.5326	51.1612	56.5055	56.0664	0.179876
DDB_G0281605	8613.59	2.1882	0.36814	5.94393	2.78e-09	1.76e-08	21606.5	10796.2	16201.4	3384.38	3849.1	3431.74	3555.08	0.179945
DDB_G0284855	66.6367	2.18807	0.599333	3.65084	0.000261383	0.000794807	187.52	63.1358	125.328	24.4851	22.244	35.7985	27.5092	0.17999
DDB_G0289179	7053.02	2.18637	0.178032	12.2808	1.15e-34	4.31e-33	11876.3	14647.5	13261.9	2689.28	2839.67	3212.39	2913.78	0.180133
DDB_G0274259	189.841	2.18396	0.542323	4.02705	5.65e-05	0.000195801	177.102	536.654	356.878	87.965	75.1847	72.2989	78.4829	0.180271
DDB_G0285211	3461.58	2.18478	0.38321	5.70127	1.19e-08	6.96e-08	4411.93	8602.25	6507.09	1233.55	1372.01	1688.14	1431.23	0.180294
DDB_G0278021	256.056	2.18243	0.275299	7.92749	2.24e-15	2.52e-14	567.77	394.599	481.184	102.701	93.4248	121.785	105.97	0.180481
DDB_G0272524	2217.71	2.18083	0.170369	12.8006	1.63e-37	7.01e-36	4458.81	3872.33	4165.57	809.822	968.059	979.545	919.142	0.180766
DDB_G0292538	1302.44	2.17939	0.353511	6.16499	7.05e-10	4.74e-09	3224.31	1667.84	2446.07	567.238	551.651	501.179	540.023	0.180846
DDB_G0287053	264.367	2.17655	0.468778	4.64302	3.43e-06	1.46e-05	713.619	278.85	496.234	112.903	114.334	102.131	109.79	0.181164
DDB_G0294036	376.809	2.17492	0.664946	3.27081	0.00107239	0.00286056	1151.17	263.066	707.116	153.485	146.81	169.516	156.604	0.181313
DDB_G0272947	1543.11	2.17476	0.461802	4.70928	2.49e-06	1.08e-05	1692.89	4098.56	2895.73	547.514	633.954	742.643	641.37	0.181327
DDB_G0287469	12109.7	2.16837	0.34489	6.28714	3.23e-10	2.24e-09	29388.6	16010.2	22699.4	4385.32	5292.74	5471.55	5049.87	0.181982
DDB_G0271730	1075.16	2.16595	0.380905	5.68634	1.3e-08	7.56e-08	2719.04	1310.07	2014.56	474.285	428.419	443.972	448.892	0.182221
DDB_G0274185	242.135	2.15813	0.250205	8.62545	6.38e-18	8.9e-17	364.623	541.915	453.269	108.369	96.0941	99.6743	101.379	0.182781
DDB_G0286623	213.629	2.15823	0.381089	5.66332	1.48e-08	8.58e-08	520.89	278.85	399.87	99.9808	72.9603	95.4627	89.4679	0.182835
DDB_G0271346	107.564	2.15505	0.323181	6.66824	2.59e-11	2.02e-10	250.027	152.578	201.303	49.1969	40.0392	45.9765	45.0709	0.182937
DDB_G0277329	282.857	2.15912	0.249242	8.66275	4.61e-18	6.5e-17	421.921	636.619	529.27	112.903	124.566	118.275	118.582	0.183038
DDB_G0292760	79.551	2.15737	0.531909	4.0559	4.99e-05	0.000174339	218.774	78.9197	148.847	37.6345	34.7006	27.7263	33.3538	0.183061
DDB_G0268004	556.877	2.15182	0.717964	2.99711	0.00272554	0.00662363	1744.98	336.724	1040.85	238.73	219.326	244.623	234.226	0.183696
DDB_G0290929	987.804	2.14701	0.285239	7.52706	5.19e-14	5.18e-13	1437.66	2251.84	1844.75	384.507	390.16	474.857	416.508	0.184193
DDB_G0291265	321.634	2.14519	0.562847	3.81132	0.000138228	0.000448226	906.348	294.634	600.491	137.615	109.885	159.689	135.73	0.18436
DDB_G0273493	218.487	2.14558	0.280301	7.65456	1.94e-14	2e-13	494.845	320.94	407.893	87.5115	86.3067	102.833	92.2171	0.184394
DDB_G0284227	144.509	2.13762	0.24037	8.89306	5.95e-19	9.01e-18	244.818	294.634	269.726	65.2936	54.2754	63.5248	61.0312	0.18452
DDB_G0276513	126.36	2.14404	0.268569	7.98319	1.43e-15	1.63e-14	187.52	284.111	235.816	51.2373	53.8305	55.1016	53.3898	0.184609
DDB_G0270742	297.884	2.1434	0.42085	5.09301	3.52e-07	1.72e-06	369.832	741.845	555.838	97.7136	136.133	143.896	125.914	0.184692
DDB_G0283327	6390.91	2.13454	0.655214	3.25777	0.00112291	0.00297236	19345.8	4472.12	11909	2498.39	2942.44	2695.77	2712.2	0.185498
DDB_G0274743	246.655	2.13459	0.489726	4.35875	1.31e-05	5.05e-05	671.948	247.282	459.615	104.515	101.433	108.097	104.682	0.185508
DDB_G0279911	1825.3	2.13196	0.1583	13.4679	2.42e-41	1.24e-39	3568.09	3230.45	3399.27	735.233	867.961	724.744	775.979	0.185852
DDB_G0285957	255.713	2.12894	0.223174	9.5394	1.44e-21	2.65e-20	520.89	431.428	476.159	119.025	112.11	95.1117	108.749	0.185925
DDB_G0275357	60.452	2.11875	0.334697	6.33037	2.45e-10	1.71e-09	119.805	105.226	112.515	29.2461	24.4684	23.5147	25.7431	0.186195
DDB_G0271860	268.067	2.12693	0.571447	3.72201	0.000197642	0.000615567	729.245	268.327	498.786	83.8841	104.102	154.776	114.254	0.186373
DDB_G0270438	196.622	2.12551	0.373564	5.68981	1.27e-08	7.42e-08	489.636	242.02	365.828	88.8718	81.8579	80.7221	83.8173	0.186407
DDB_G0293124	1127.9	2.12443	0.395802	5.3674	7.99e-08	4.24e-07	2870.1	1325.85	2097.98	479.273	494.707	469.592	481.191	0.186568
DDB_G0281243	76.1384	2.12592	0.493413	4.3086	1.64e-05	6.26e-05	88.5512	194.669	141.61	25.6187	31.1416	40.712	32.4908	0.186621
DDB_G0280267	690.597	2.12081	0.268414	7.90128	2.76e-15	3.06e-14	1578.3	989.127	1283.71	287.473	287.837	310.254	295.188	0.186958
DDB_G0288379	63.5713	2.1163	0.663208	3.19101	0.00141777	0.00366752	46.8801	189.407	118.144	31.0598	23.1338	27.3753	27.1896	0.187085
DDB_G0286197	1392.86	2.11528	0.200943	10.5268	6.5e-26	1.56e-24	2943.03	2230.8	2586.91	652.482	556.1	581.901	596.828	0.187461
DDB_G0283397	100.008	2.10865	0.292379	7.21207	5.51e-13	5.01e-12	208.356	163.101	185.728	46.4763	36.4802	45.6255	42.8607	0.187501
DDB_G0282579	1885.19	2.11565	0.182084	11.6191	3.3e-31	1.06e-29	3734.78	3267.28	3501.03	737.5	764.749	921.636	807.962	0.187506
DDB_G0292552	4867.99	2.11498	0.51005	4.14662	3.37e-05	0.000121715	13433.7	4645.74	9039.74	2168.52	2134.98	1956.98	2086.83	0.187554
DDB_G0286181	148.981	2.11259	0.736547	2.86824	0.00412762	0.00967112	463.592	89.4423	276.517	58.0387	58.7242	75.1067	63.9565	0.187846
DDB_G0292300	62.1371	2.11308	0.380349	5.55562	2.77e-08	1.56e-07	83.3423	147.317	115.33	24.4851	25.3582	30.183	26.6754	0.187849
DDB_G0271996	71.9169	2.11679	0.324229	6.5287	6.63e-11	4.92e-10	156.267	110.488	133.377	27.4324	33.8109	31.5869	30.9434	0.188311
DDB_G0291862	49489.7	2.10494	0.289474	7.2716	3.55e-13	3.3e-12	112929	70543.7	91736.3	18580.6	22656	22739.4	21325.3	0.188617
DDB_G0282423	3191.6	2.09947	0.557922	3.76301	0.000167879	0.00053157	2771.13	9049.46	5910.3	1278.21	1355.99	1503.19	1379.13	0.189196
DDB_G0291247	3682.82	2.09935	0.324426	6.47098	9.74e-11	7.07e-10	8693.65	4945.64	6819.64	1423.99	1763.06	1587.77	1591.61	0.189224
DDB_G0278551	620.931	2.09962	0.37154	5.65114	1.59e-08	9.17e-08	1531.42	768.152	1149.78	241.677	279.83	283.58	268.362	0.189235
DDB_G0289189	84.9672	2.09645	0.330499	6.3433	2.25e-10	1.58e-09	114.596	199.93	157.263	36.9543	38.2597	35.0966	36.7702	0.189505
DDB_G0285319	6446.41	2.09679	0.149889	13.989	1.82e-44	1.04e-42	12798.3	11064.5	11931.4	2530.13	2936.65	2902.49	2789.75	0.189507
DDB_G0281521	277.277	2.09507	0.161865	12.9433	2.56e-38	1.16e-36	500.054	526.131	513.093	118.345	116.559	125.295	120.066	0.18963
DDB_G0290219	205.486	2.09443	0.362517	5.77747	7.58e-09	4.54e-08	255.236	505.086	380.161	84.5642	91.6453	90.9001	89.0365	0.189763
DDB_G0272949	686.861	2.09027	0.396074	5.27746	1.31e-07	6.78e-07	1734.56	804.981	1269.77	284.299	313.196	297.268	298.254	0.19021
DDB_G0278575	121.407	2.08744	0.725472	2.87735	0.00401026	0.00942415	375.04	73.6584	224.349	57.1319	47.1573	54.0487	52.7793	0.19045
DDB_G0348374	79.4168	2.08232	0.277944	7.49186	6.79e-14	6.72e-13	130.222	163.101	146.662	35.3674	34.7006	33.6927	34.5869	0.190826
DDB_G0267834	70.6738	2.08041	0.679422	3.06203	0.00219844	0.00544824	208.356	52.6131	130.484	39.2215	25.803	27.3753	30.7999	0.190967
DDB_G0269332	489.695	2.08274	0.273987	7.60161	2.92e-14	2.98e-13	692.783	1115.4	904.091	213.564	224.22	202.507	213.43	0.190986
DDB_G0286733	123.339	2.08562	0.266782	7.8177	5.38e-15	5.84e-14	260.445	194.669	227.557	48.9702	59.6139	52.9958	53.86	0.191389
DDB_G0267420	1647.79	2.07613	0.353658	5.87043	4.35e-09	2.68e-08	2052.3	4024.91	3038.61	719.136	717.147	725.446	720.576	0.191684
DDB_G0269686	365.404	2.0741	0.564228	3.676	0.000236923	0.000727443	1031.36	315.679	673.52	143.963	161.936	174.079	159.993	0.19195
DDB_G0278173	59.4736	2.07548	0.622238	3.3355	0.000851451	0.00232	171.894	47.3518	109.623	26.2988	29.3621	22.4618	26.0409	0.191952
DDB_G0277429	235.199	2.07299	0.517801	4.00345	6.24e-05	0.000214658	635.485	231.498	433.492	104.968	85.417	118.626	103.004	0.191994
DDB_G0274487	1456.7	2.06879	0.272751	7.58492	3.33e-14	3.38e-13	3286.81	2078.22	2682.52	594.67	629.95	693.859	639.493	0.192502
DDB_G0292926	59.6035	2.06021	0.58141	3.54347	0.000394901	0.00115683	145.849	73.6584	109.754	35.8208	16.0157	26.6734	26.17	0.192534
DDB_G0287721	100.855	2.0754	0.388316	5.34461	9.06e-08	4.77e-07	213.565	157.839	185.702	31.9666	50.7163	50.1881	44.2904	0.192573
DDB_G0278335	261.711	2.06935	0.248036	8.34293	7.25e-17	9.4e-16	458.383	505.086	481.735	95.6732	117.448	131.963	115.028	0.192754
DDB_G0274607	778.959	2.06204	0.635191	3.24634	0.00116901	0.00308253	2286.71	578.745	1432.72	325.108	305.188	399.048	343.114	0.193213
DDB_G0288437	77.0252	2.05692	0.538653	3.81864	0.000134192	0.000435906	104.178	178.885	141.531	26.0721	25.803	50.1881	34.0211	0.193794
DDB_G0285501	137.911	2.0542	0.540027	3.80388	0.000142448	0.00046042	380.249	126.272	253.26	56.225	58.7242	68.0873	61.0122	0.194138
DDB_G0293434	2374.82	2.05023	0.265369	7.72598	1.11e-14	1.17e-13	5344.33	3372.5	4358.41	997.994	1071.27	1087.99	1052.42	0.194502
DDB_G0305538	68.3071	2.04592	0.593833	3.44528	0.000570465	0.00161788	187.52	63.1358	125.328	38.5413	28.4723	23.8657	30.2931	0.194659
DDB_G0287615	81.0684	2.04928	0.660387	3.10315	0.00191471	0.00482415	239.609	57.8745	148.742	33.7804	33.366	40.712	35.9528	0.194661
DDB_G0275913	407.762	2.04344	0.420946	4.85439	1.21e-06	5.46e-06	453.174	1041.74	747.457	178.877	177.952	187.065	181.298	0.195205
DDB_G0267424	224.177	2.04894	0.215952	9.48791	2.36e-21	4.26e-20	416.712	405.121	410.916	87.0581	108.106	103.886	99.6833	0.195228
DDB_G0285277	14537.1	2.04341	0.197557	10.3434	4.48e-25	1.03e-23	26648.7	26643.3	26646	5316.21	7001.08	7076.17	6464.49	0.19524
DDB_G0289449	3953.99	2.04234	0.246144	8.29733	1.06e-16	1.36e-15	8651.98	5840.06	7246.02	1649.8	1924.55	1703.59	1759.31	0.195363
DDB_G0276333	94.0971	2.04015	0.459997	4.43514	9.2e-06	3.65e-05	239.609	105.226	172.418	48.29	42.2636	35.0966	41.8834	0.195442
DDB_G0283377	1088.28	2.04088	0.189503	10.7696	4.79e-27	1.24e-25	2208.57	1778.32	1993.45	433.703	524.514	496.265	484.827	0.195631
DDB_G0285509	1415.14	2.03821	0.232734	8.7577	1.99e-18	2.89e-17	3099.29	2083.48	2591.39	620.742	634.844	637.354	630.98	0.195813
DDB_G0280749	58.7685	2.0317	0.522864	3.88573	0.000102025	0.000337272	57.2979	157.839	107.569	29.9262	24.9133	23.8657	26.2351	0.196071
DDB_G0291303	632.409	2.03507	0.397125	5.12452	2.98e-07	1.47e-06	1583.5	731.323	1157.41	287.02	269.597	290.6	282.406	0.19614
DDB_G0286393	1756.98	2.03481	0.290831	6.99655	2.62e-12	2.24e-11	4042.1	2388.64	3215.37	772.867	778.985	802.308	784.72	0.196176
DDB_G0293812	159.951	2.03148	0.522963	3.88456	0.000102515	0.000338689	395.876	189.407	292.642	78.8964	45.3778	90.1982	71.4908	0.196332
DDB_G0275215	156.047	2.03559	0.219888	9.25741	2.09e-20	3.49e-19	260.445	310.418	285.431	64.8401	71.1808	73.3518	69.7909	0.196471
DDB_G0278761	611.715	2.02712	0.221721	9.14264	6.09e-20	9.82e-19	1041.78	1194.32	1118.05	268.202	234.897	319.379	274.159	0.196924
DDB_G0274099	87.2474	2.02965	0.390477	5.19786	2.02e-07	1.02e-06	208.356	110.488	159.422	38.7681	44.9329	33.6927	39.1312	0.197082
DDB_G0269368	64.3018	2.02646	0.598967	3.38326	0.000716303	0.00198308	177.102	57.8745	117.488	32.6468	32.4762	21.4089	28.844	0.197113
DDB_G0281239	295.263	2.02865	0.288155	7.04011	1.92e-12	1.66e-11	494.845	584.006	539.425	116.758	165.94	114.766	132.488	0.19718
DDB_G0283939	273.587	2.02634	0.216314	9.36761	7.42e-21	1.29e-19	531.307	468.257	499.782	112.223	116.114	140.035	122.791	0.197231
DDB_G0287507	329.517	2.02306	0.24118	8.38815	4.94e-17	6.47e-16	682.365	520.87	601.618	134.441	139.692	170.218	148.117	0.19756
DDB_G0277867	1030.03	2.0186	0.314078	6.42707	1.3e-10	9.37e-10	1359.52	2399.16	1879.34	439.145	459.561	492.756	463.82	0.197946
DDB_G0269060	83.0292	2.01679	0.496066	4.06557	4.79e-05	0.000167903	218.774	84.181	151.477	39.4482	32.0314	40.712	37.3972	0.198
DDB_G0284661	288.827	2.01538	0.262573	7.67549	1.65e-14	1.71e-13	416.712	636.619	526.665	123.559	125.456	141.79	130.268	0.198298
DDB_G0293000	23488.2	2.01478	0.687693	2.92976	0.00339219	0.00809053	15095.4	70554.2	42824.8	8950.21	11132.2	11708.9	10597.1	0.198366
DDB_G0278649	1003.04	2.01299	0.482701	4.17027	3.04e-05	0.000110615	2630.49	1025.96	1828.22	490.835	377.258	490.65	452.915	0.198548
DDB_G0286189	201.518	2.01219	0.494427	4.06974	4.71e-05	0.000165503	197.938	536.654	367.296	94.0862	82.7477	96.1646	90.9995	0.198561
DDB_G0277419	233.723	2.01385	0.346919	5.80496	6.44e-09	3.89e-08	557.352	294.634	425.993	99.0739	104.547	113.011	105.544	0.198564
DDB_G0294020	143.835	2.00965	0.369895	5.43302	5.54e-08	2.99e-07	192.729	331.463	262.096	64.3867	53.3856	77.2125	64.9949	0.198706
DDB_G0280481	114.704	2.00834	0.482642	4.16115	3.17e-05	0.000114671	286.489	131.533	209.011	66.8806	44.0431	44.5726	51.8321	0.19871
DDB_G0281067	3813.22	2.01053	0.346537	5.80177	6.56e-09	3.96e-08	9032.23	4861.45	6946.84	1575.66	1662.96	1933.82	1724.15	0.198841
DDB_G0292270	1377.98	2.00656	0.170945	11.7381	8.13e-32	2.7e-30	2838.85	2178.18	2508.52	628.224	615.714	628.931	624.289	0.199275
DDB_G0286555	149.802	2.00413	0.395156	5.07174	3.94e-07	1.91e-06	177.102	368.292	272.697	74.1354	61.3934	68.0873	67.8721	0.19929
DDB_G0285899	2648.68	2.00685	0.132479	15.1485	7.75e-52	5.42e-50	4818.23	4824.63	4821.43	1142.64	1322.18	1135.72	1200.18	0.199313
DDB_G0287943	70.5258	2.00187	0.291854	6.85916	6.93e-12	5.7e-11	135.431	121.01	128.221	32.1934	33.8109	30.183	32.0624	0.200036
DDB_G0292460	27300.1	1.99719	0.328901	6.07231	1.26e-09	8.24e-09	63043.3	36176.8	49610	10604.5	13285.9	13390	12426.8	0.200314
DDB_G0293374	118.482	1.98801	0.380684	5.22221	1.77e-07	9.01e-07	140.64	289.372	215.006	56.9052	52.4958	52.9958	54.1323	0.201132
DDB_G0268560	86.5983	1.99318	0.277165	7.19133	6.42e-13	5.79e-12	145.849	168.362	157.106	36.2742	40.0392	42.4668	39.5934	0.201289
DDB_G0277607	684.753	1.98853	0.254176	7.82344	5.14e-15	5.6e-14	1484.54	999.65	1242.09	297.222	347.896	294.46	313.193	0.201373
DDB_G0289815	156.202	1.9884	0.52539	3.78463	0.000153938	0.000494807	156.267	410.383	283.325	55.3182	73.4052	85.6356	71.453	0.201402
DDB_G0280845	248.805	1.98602	0.46206	4.29819	1.72e-05	6.53e-05	255.236	647.142	451.189	113.81	118.338	109.501	113.883	0.201538
DDB_G0270068	270.188	1.98436	0.254852	7.78631	6.9e-15	7.43e-14	484.427	494.564	489.495	100.888	128.57	142.492	123.983	0.202099
DDB_G0285837	232.176	1.98171	0.429039	4.61896	3.86e-06	1.64e-05	583.396	257.804	420.6	104.288	119.228	96.1646	106.56	0.20214
DDB_G0268394	475.085	1.97359	0.430821	4.581	4.63e-06	1.94e-05	1198.05	520.87	859.458	215.832	198.861	241.815	218.836	0.202947
DDB_G0285971	10134.4	1.97186	0.145201	13.5802	5.25e-42	2.74e-40	16824.7	19829.9	18327.3	4331.14	4937.28	4748.92	4672.45	0.203152
DDB_G0285703	1071.95	1.96984	0.252674	7.79599	6.39e-15	6.9e-14	2317.96	1557.35	1937.65	445.493	507.608	531.362	494.821	0.203423
DDB_G0284157	319.459	1.96852	0.43886	4.48554	7.27e-06	2.94e-05	812.588	341.985	577.287	136.708	156.153	149.862	147.575	0.20359
DDB_G0291191	11471.4	1.96615	0.339226	5.796	6.79e-09	4.1e-08	14387	27058.9	20723	5001.31	5428.87	5481.03	5303.74	0.203781
DDB_G0269238	1157.09	1.96402	0.470085	4.17801	2.94e-05	0.000107126	3015.95	1162.75	2089.35	501.037	562.773	542.944	535.585	0.204037
DDB_G0272264	389.024	1.96166	0.331011	5.92629	3.1e-09	1.95e-08	541.725	862.856	702.29	180.691	146.81	213.036	180.179	0.204176
DDB_G0289439	223.682	1.95722	0.307478	6.36539	1.95e-10	1.38e-09	307.325	499.825	403.575	111.543	89.8658	109.852	103.754	0.20451
DDB_G0267460	148.181	1.95753	0.265116	7.38366	1.54e-13	1.48e-12	208.356	326.201	267.279	68.6943	68.5115	69.1402	68.782	0.204671
DDB_G0292388	29423.3	1.95361	0.170531	11.456	2.19e-30	6.84e-29	52755.7	53291.9	53023.8	11666.7	14710.8	14691.4	13689.7	0.205201
DDB_G0284411	108.896	1.94614	0.438256	4.44064	8.97e-06	3.57e-05	265.654	126.272	195.963	56.6784	55.1651	40.712	50.8519	0.206033
DDB_G0292464	139.275	1.94673	0.584816	3.32879	0.000872249	0.00237257	385.458	115.749	250.604	63.4799	75.1847	56.5055	65.0567	0.206097
DDB_G0269462	1533.14	1.94518	0.214497	9.06856	1.21e-19	1.9e-18	2286.71	3230.45	2758.58	744.301	680.222	724.042	716.188	0.206111
DDB_G0279699	781.93	1.94527	0.591912	3.28642	0.00101468	0.00271979	2203.36	610.312	1406.84	372.037	371.92	352.019	365.325	0.206147
DDB_G0279187	13208.9	1.94456	0.31558	6.16186	7.19e-10	4.82e-09	30414.7	17109.8	23762.3	6015.62	5967.62	6536.74	6173.33	0.20622
DDB_G0289513	660.35	1.94407	0.195797	9.92903	3.11e-23	6.21e-22	1302.22	1073.31	1187.77	321.707	333.215	271.296	308.739	0.206307
DDB_G0273875	1754.13	1.94267	0.340069	5.71257	1.11e-08	6.53e-08	4125.45	2183.45	3154.45	856.071	816.355	789.322	820.583	0.206434
DDB_G0268852	74.3478	1.93909	0.35353	5.48495	4.14e-08	2.27e-07	93.7601	173.623	133.692	36.5009	33.8109	34.0437	34.7852	0.206468
DDB_G0285761	926.108	1.94077	0.346771	5.5967	2.18e-08	1.24e-07	2177.32	1152.23	1664.77	416.473	411.069	473.453	433.665	0.206661
DDB_G0285607	59.7192	1.92681	0.379933	5.07144	3.95e-07	1.91e-06	114.596	99.965	107.28	34.4605	25.3582	24.2166	28.0118	0.207047
DDB_G0293308	694.15	1.93307	0.113796	16.9872	1.02e-64	1.01e-62	1291.81	1199.58	1245.69	320.573	330.991	327.802	326.455	0.207649
DDB_G0272969	476.932	1.92758	0.464913	4.1461	3.38e-05	0.000121913	479.218	1231.15	855.183	228.528	217.991	227.777	224.765	0.208126
DDB_G0288459	313.307	1.92786	0.440263	4.37887	1.19e-05	4.64e-05	776.125	347.247	561.686	122.199	152.149	168.814	147.721	0.208231
DDB_G0270118	208.139	1.92664	0.67362	2.86013	0.00423468	0.00988838	609.441	136.794	373.117	104.515	100.098	89.8472	98.1534	0.208274
DDB_G0286979	74.4299	1.92035	0.375263	5.11735	3.1e-07	1.52e-06	156.267	110.488	133.377	36.0475	27.5826	41.7649	35.1317	0.208485
DDB_G0288237	555.776	1.92223	0.40601	4.73445	2.2e-06	9.62e-06	1359.52	631.358	995.44	249.839	243.349	294.811	262.666	0.208779
DDB_G0276241	713.45	1.91996	0.444202	4.32225	1.54e-05	5.9e-05	1807.49	747.107	1277.3	355.261	344.337	313.061	337.553	0.209031
DDB_G0295699	332.664	1.91933	0.491795	3.9027	9.51e-05	0.000316552	864.677	326.201	595.439	138.069	157.488	176.887	157.481	0.20916
DDB_G0288693	230.083	1.91844	0.43045	4.45683	8.32e-06	3.33e-05	250.027	573.483	411.755	98.6205	118.783	109.501	108.968	0.209263
DDB_G0292404	2913.13	1.91629	0.628576	3.04863	0.0022989	0.00567933	8302.98	2120.31	5211.64	1309.95	1596.67	1235.75	1380.79	0.209451
DDB_G0271980	2043.84	1.91329	0.635913	3.00873	0.00262344	0.00640229	5682.91	1625.75	3654.33	1148.53	1111.31	650.69	970.178	0.209791
DDB_G0275473	12875.9	1.91152	0.314414	6.07963	1.2e-09	7.9e-09	29154.2	16873	23013.6	5444.08	6501.03	6407.23	6117.45	0.209997
DDB_G0271290	169.496	1.91202	0.500031	3.8238	0.000131409	0.000427265	442.756	163.101	302.928	80.2567	89.4209	71.948	80.5418	0.210034
DDB_G0271666	246.938	1.90905	0.577423	3.30616	0.000945845	0.00255263	677.156	205.191	441.174	125.826	98.7634	127.752	117.447	0.210245
DDB_G0287541	160.751	1.90829	0.592219	3.22228	0.00127175	0.00332487	447.965	126.272	287.118	75.0423	73.4052	81.0731	76.5068	0.2104
DDB_G0281139	67.5451	1.90453	0.361286	5.27153	1.35e-07	6.99e-07	83.3423	157.839	120.591	31.9666	31.5865	32.9908	32.1813	0.210649
DDB_G0287259	279.752	1.90564	0.27166	7.0148	2.3e-12	1.97e-11	609.441	389.337	499.389	137.615	140.582	121.785	133.327	0.210722
DDB_G0290333	22412.8	1.90356	0.113575	16.7604	4.75e-63	4.41e-61	40936.7	39054.7	39995.7	9826.91	11102	11143.5	10690.8	0.21092
DDB_G0278975	102.748	1.89568	0.353248	5.36643	8.03e-08	4.26e-07	161.476	205.191	183.334	56.4517	36.925	53.6977	49.0248	0.210988
DDB_G0278539	30039.7	1.8983	0.406031	4.67527	2.94e-06	1.27e-05	34248.5	72853.4	53551	12250.3	15221.1	15625.3	14365.6	0.211518
DDB_G0293008	594.964	1.89019	0.269844	7.00477	2.47e-12	2.12e-11	1286.6	831.288	1058.94	283.619	260.255	313.061	285.645	0.212441
DDB_G0283451	137.093	1.88831	0.464128	4.06851	4.73e-05	0.000166058	145.849	341.985	243.917	59.399	59.6139	78.6163	65.8764	0.212646
DDB_G0291720	116.48	1.88596	0.436781	4.31787	1.58e-05	6.02e-05	125.013	289.372	207.193	60.5326	56.9446	50.5391	56.0054	0.212788
DDB_G0293050	328.961	1.88575	0.506805	3.72086	0.000198543	0.0006182	864.677	305.156	584.916	147.591	159.267	168.113	158.323	0.213018
DDB_G0267452	3003.74	1.88503	0.580187	3.249	0.00115812	0.00305601	8313.4	2367.59	5340.49	1434.19	1497.91	1405.62	1445.91	0.213059
DDB_G0282463	501.914	1.88231	0.484752	3.88303	0.000103163	0.000340729	489.636	1294.28	891.96	267.749	238.901	219.003	241.884	0.213331
DDB_G0274775	1563.63	1.87658	0.529842	3.54177	0.000397447	0.00116367	4182.74	1367.94	2775.34	761.305	732.272	773.879	755.819	0.214043
DDB_G0289467	618.898	1.87671	0.375319	5.00032	5.72e-07	2.71e-06	760.499	1436.34	1098.42	260.721	355.459	281.474	299.218	0.214089
DDB_G0285619	2085.34	1.86834	0.455333	4.10324	4.07e-05	0.000144923	2250.24	5140.3	3695.27	950.838	843.937	1241.37	1012.05	0.214994
DDB_G0274027	716.945	1.86477	0.443032	4.2091	2.56e-05	9.41e-05	1781.44	757.629	1269.54	359.341	303.408	382.904	348.551	0.215409
DDB_G0281829	260.943	1.86325	0.597404	3.11891	0.00181522	0.00459973	203.147	720.8	461.974	135.575	110.775	134.42	126.923	0.215527
DDB_G0272450	318.962	1.86199	0.438533	4.24595	2.18e-05	8.08e-05	734.454	394.599	564.526	150.765	113.889	201.103	155.252	0.215695
DDB_G0270220	894.481	1.86239	0.430566	4.32545	1.52e-05	5.83e-05	2208.57	957.559	1583.07	399.47	423.526	483.28	435.425	0.215718
DDB_G0293388	1363.64	1.86016	0.399954	4.65093	3.3e-06	1.41e-05	1573.09	3251.49	2412.29	594.67	776.316	622.613	664.533	0.21598
DDB_G0277589	232.665	1.85899	0.335087	5.54777	2.89e-08	1.62e-07	286.489	536.654	411.572	115.624	109.44	115.117	113.394	0.216002
DDB_G0282407	116.995	1.86558	0.367052	5.08261	3.72e-07	1.81e-06	171.894	242.02	206.957	43.0756	67.6218	60.3661	57.0212	0.216007
DDB_G0286907	1065.74	1.85948	0.379013	4.90613	9.29e-07	4.28e-06	1255.34	2514.91	1885.13	475.192	494.707	588.569	519.489	0.216038
DDB_G0284019	284.267	1.85407	0.247838	7.48097	7.38e-14	7.28e-13	494.845	510.348	502.596	150.311	112.11	153.723	138.715	0.216299
DDB_G0277975	16436.3	1.85514	0.228899	8.10459	5.29e-16	6.31e-15	34092.2	24002.1	29047.2	7276.61	8487.42	8323.15	8029.06	0.216555
DDB_G0274485	161.435	1.85512	0.211524	8.77023	1.78e-18	2.59e-17	307.325	263.066	285.195	75.4957	77.4091	83.8808	78.9285	0.216763
DDB_G0279429	870.173	1.85309	0.643508	2.87967	0.00398096	0.00936311	2448.18	626.096	1537.14	415.34	516.951	344.297	425.529	0.216812
DDB_G0272388	160.456	1.84965	0.519492	3.56049	0.000370161	0.00109072	151.058	415.644	283.351	93.4061	71.6257	70.5441	78.5253	0.216995
DDB_G0270130	211.008	1.85028	0.533281	3.46962	0.000521188	0.00148956	187.52	557.699	372.61	111.316	90.7555	107.746	103.273	0.217013
DDB_G0277037	588.747	1.84878	0.533633	3.46452	0.000531176	0.00151619	1567.88	510.348	1039.11	285.886	278.495	301.129	288.503	0.217309
DDB_G0287035	1103.77	1.83928	0.423437	4.34369	1.4e-05	5.39e-05	2515.9	1373.2	1944.55	722.537	427.085	480.121	543.248	0.218365
DDB_G0273995	194.335	1.83971	0.452803	4.06294	4.85e-05	0.000169644	468.801	215.714	342.257	75.9491	96.0941	115.117	95.72	0.21855
DDB_G0269522	128.075	1.83839	0.44204	4.15888	3.2e-05	0.000115741	135.431	315.679	225.555	62.1196	70.291	56.8564	63.089	0.21857
DDB_G0290959	101.205	1.83833	0.325484	5.64799	1.62e-08	9.32e-08	130.222	226.237	178.229	46.9298	48.9368	53.6977	49.8548	0.218581
DDB_G0271970	715.082	1.83304	0.22356	8.19931	2.42e-16	2.97e-15	1463.7	1052.26	1257.98	334.856	336.774	387.817	353.149	0.219193
DDB_G0292698	308.455	1.83063	0.234092	7.82013	5.28e-15	5.73e-14	437.547	647.142	542.344	147.591	158.377	151.617	152.528	0.219505
DDB_G0269896	66.9029	1.83359	0.382732	4.79078	1.66e-06	7.4e-06	151.058	84.181	117.62	29.2461	32.4762	37.5533	33.0919	0.219571
DDB_G0288251	2793.94	1.82879	0.138737	13.1818	1.12e-39	5.43e-38	5219.31	4603.65	4911.48	1427.16	1268.35	1451.24	1382.25	0.219624
DDB_G0287657	242.656	1.82921	0.308451	5.93031	3.02e-09	1.9e-08	479.218	373.553	426.386	117.438	147.255	95.8136	120.169	0.219866
DDB_G0284237	20922.8	1.82454	0.374919	4.8665	1.14e-06	5.16e-06	49088.6	24402	36745.3	9298.67	10612.6	11211.9	10374.4	0.220171
DDB_G0287533	71.746	1.82312	0.535596	3.40391	0.000664282	0.00185113	62.5067	189.407	125.957	33.5536	37.8148	35.4475	35.6053	0.220381
DDB_G0272282	1337.89	1.82056	0.273618	6.65365	2.86e-11	2.21e-10	2906.56	1788.85	2347.71	684.902	665.096	644.022	664.673	0.220647
DDB_G0270760	1510.04	1.82029	0.404752	4.49729	6.88e-06	2.8e-05	3557.68	1741.5	2649.59	640.24	717.591	893.208	750.346	0.220695
DDB_G0280961	103.045	1.8245	0.318057	5.73639	9.67e-09	5.73e-08	156.267	205.191	180.729	45.3428	61.3934	47.0294	51.2552	0.220943
DDB_G0288639	974.981	1.81764	0.570837	3.18416	0.00145173	0.00374748	2635.7	783.936	1709.82	480.18	532.521	442.568	485.09	0.221007
DDB_G0286491	132.944	1.81386	0.220531	8.22496	1.95e-16	2.43e-15	229.191	236.759	232.975	67.7874	68.5115	62.4719	66.2569	0.221423
DDB_G0267906	268.099	1.81363	0.617328	2.93786	0.00330483	0.00789753	734.454	205.191	469.823	149.858	104.992	146.002	133.617	0.221426
DDB_G0291251	1005.65	1.8138	0.282123	6.42909	1.28e-10	9.25e-10	2172.11	1352.16	1762.13	460.002	496.486	547.506	501.332	0.221489
DDB_G0280007	204.525	1.81354	0.247362	7.33152	2.28e-13	2.16e-12	416.712	299.895	358.303	95.6732	96.9838	113.362	102.006	0.221604
DDB_G0287033	3500.89	1.81096	0.333732	5.42639	5.75e-08	3.1e-07	4354.64	7907.76	6131.2	1689.24	1617.58	1935.22	1747.35	0.221786
DDB_G0284353	61.2729	1.80001	0.383641	4.69191	2.71e-06	1.18e-05	119.805	94.7037	107.254	34.2338	23.5786	34.0437	30.6187	0.222079
DDB_G0291390	3305.38	1.80441	0.519709	3.47196	0.000516673	0.00147901	8636.35	2925.29	5780.82	1525.56	1673.64	1766.06	1655.08	0.22258
DDB_G0289325	3715.82	1.80229	0.256097	7.03754	1.96e-12	1.69e-11	7745.63	5245.53	6495.58	1634.83	2004.18	1948.91	1862.64	0.222852
DDB_G0291988	468.405	1.80178	0.550742	3.27156	0.00106956	0.0028551	390.667	1246.93	818.799	250.972	234.452	219.003	234.809	0.222862
DDB_G0282539	417.463	1.8003	0.240068	7.49913	6.42e-14	6.37e-13	875.094	584.006	729.55	219.686	202.865	205.666	209.406	0.22302
DDB_G0267454	30592.8	1.79992	0.318764	5.64658	1.64e-08	9.38e-08	68601.2	38307.6	53454.4	14491.5	16013.9	15549.5	15351.7	0.223115
DDB_G0292042	438.025	1.79733	0.550079	3.2674	0.0010854	0.00289247	1166.79	363.031	764.912	216.285	224.664	219.354	220.101	0.22345
DDB_G0286079	1527.3	1.79589	0.479461	3.74565	0.000179928	0.000565503	3875.42	1457.38	2666.4	797.806	714.477	791.428	767.904	0.223598
DDB_G0285681	142.464	1.79065	0.299741	5.97399	2.32e-09	1.48e-08	244.818	252.543	248.681	86.1512	69.8462	58.9622	71.6532	0.223683
DDB_G0267590	549.004	1.79498	0.521583	3.44142	0.000578673	0.00163905	1432.45	484.041	958.244	277.044	293.176	258.311	276.177	0.22373
DDB_G0274595	7366.19	1.79448	0.0956689	18.7572	1.69e-78	2.15e-76	12642	13069.1	12855.5	3486.4	3841.98	3791.48	3706.62	0.223801
DDB_G0275881	29708.6	1.7933	0.196752	9.11449	7.9e-20	1.26e-18	57959.4	45715.6	51837.5	13157.6	15913.4	15797.3	14956.1	0.223915
DDB_G0281319	202.101	1.79227	0.47937	3.73879	0.000184905	0.000579167	510.472	194.669	352.57	104.288	92.9799	108.097	101.789	0.224027
DDB_G0272456	228.143	1.79344	0.248803	7.20825	5.67e-13	5.14e-12	406.294	389.337	397.816	109.276	136.133	99.6743	115.028	0.224294
DDB_G0267746	279.469	1.79099	0.225777	7.93255	2.15e-15	2.42e-14	437.547	536.654	487.101	130.134	161.047	131.963	141.048	0.224545
DDB_G0278077	1928.92	1.78794	0.179743	9.94718	2.59e-23	5.21e-22	3745.2	2977.9	3361.55	892.346	1045.02	984.108	973.825	0.224623
DDB_G0275085	151.3	1.7864	0.604633	2.95451	0.00313163	0.00751618	411.503	115.749	263.626	78.2163	65.3974	85.6356	76.4164	0.224726
DDB_G0287295	111.037	1.79191	0.349137	5.13239	2.86e-07	1.42e-06	239.609	147.317	193.463	46.4763	63.173	58.6113	56.0869	0.224752
DDB_G0275631	183.195	1.78165	0.303185	5.87646	4.19e-09	2.6e-08	364.623	273.588	319.106	102.928	73.4052	101.429	92.5874	0.224894
DDB_G0281565	33863	1.78349	0.244251	7.30186	2.84e-13	2.66e-12	47807.2	70122.8	58965	15416.5	18127.1	17841.3	17128.3	0.225096
DDB_G0268334	231.332	1.78307	0.267657	6.66175	2.71e-11	2.1e-10	489.636	315.679	402.658	115.851	126.346	109.15	117.116	0.225321
DDB_G0281099	293.694	1.78101	0.35801	4.97476	6.53e-07	3.08e-06	354.205	668.187	511.196	143.963	134.354	167.762	148.693	0.22533
DDB_G0286075	34701.4	1.77855	0.202353	8.78937	1.5e-18	2.2e-17	52490	68234	60362	15590	18705.9	18487.1	17594.3	0.225695
DDB_G0283741	12083.2	1.77503	0.602524	2.946	0.00321916	0.00770951	8943.67	33062.1	21002.9	5487.61	6352	6570.78	6136.79	0.226119
DDB_G0279425	889.185	1.7746	0.191153	9.28363	1.64e-20	2.76e-19	1317.85	1773.06	1545.46	440.051	442.211	472.751	451.671	0.22616
DDB_G0275167	468.085	1.7743	0.178392	9.94606	2.62e-23	5.26e-22	921.975	705.016	813.495	237.823	231.338	244.272	237.811	0.226205
DDB_G0270296	489.712	1.76703	0.314102	5.62566	1.85e-08	1.05e-07	989.69	710.277	849.984	277.951	189.519	281.124	249.531	0.226947
DDB_G0284431	720.547	1.76492	0.286147	6.16787	6.92e-10	4.65e-09	1536.62	962.821	1249.72	347.552	343.002	412.736	367.763	0.227367
DDB_G0267786	229.324	1.75822	0.387042	4.54271	5.55e-06	2.29e-05	489.636	305.156	397.396	143.737	86.3067	121.785	117.276	0.227866
DDB_G0285161	107.343	1.76103	0.282234	6.23959	4.39e-10	2.99e-09	177.102	194.669	185.886	48.29	53.8305	62.8229	54.9811	0.228264
DDB_G0269120	392.377	1.75642	0.391573	4.48555	7.27e-06	2.94e-05	927.183	431.428	679.306	202.909	202.42	197.945	201.091	0.22841
DDB_G0277503	863.463	1.75262	0.323453	5.41846	6.01e-08	3.24e-07	1614.76	1373.2	1493.98	500.357	310.971	518.025	443.118	0.228753
DDB_G0269232	61.8963	1.75101	0.538249	3.25316	0.00114131	0.0030167	161.476	52.6131	107.044	33.5536	30.2518	31.5869	31.7975	0.229019
DDB_G0279387	28175.8	1.74846	0.132014	13.2445	4.85e-40	2.4e-38	47677	49719.4	48698.2	13045.8	15535.7	14900.9	14494.1	0.229365
DDB_G0273773	112.164	1.75028	0.270251	6.47649	9.39e-11	6.83e-10	166.685	220.975	193.83	52.5976	57.3895	63.1738	57.7203	0.229458
DDB_G0273749	155.975	1.73991	0.354228	4.91183	9.02e-07	4.17e-06	328.16	210.453	269.307	96.1267	64.0627	81.0731	80.4208	0.229953
DDB_G0271904	1712.73	1.74348	0.271766	6.41535	1.4e-10	1.01e-09	3635.81	2278.15	2956.98	848.816	948.039	852.847	883.234	0.229996
DDB_G0277251	182.026	1.73085	0.444678	3.89238	9.93e-05	0.000328839	437.547	189.407	313.477	102.021	80.0784	101.078	94.3926	0.231428
DDB_G0269110	618.066	1.73153	0.224473	7.71373	1.22e-14	1.29e-13	1265.76	862.856	1064.31	317.853	323.428	320.432	320.571	0.231479
DDB_G0271664	383.433	1.72897	0.208642	8.28678	1.16e-16	1.48e-15	557.352	762.891	660.121	210.39	198.416	188.118	198.975	0.23161
DDB_G0290365	123.338	1.73105	0.306144	5.65438	1.56e-08	9.02e-08	161.476	263.066	212.271	57.5853	67.1769	67.3854	64.0492	0.231794
DDB_G0282493	3129.56	1.72823	0.121259	14.2523	4.33e-46	2.6e-44	5214.1	5555.95	5385.03	1504.7	1727.02	1646.03	1625.92	0.231911
DDB_G0284357	271.239	1.72599	0.386428	4.46653	7.95e-06	3.2e-05	317.743	615.574	466.658	162.781	141.472	118.626	140.96	0.231987
DDB_G0286669	475.582	1.72607	0.407486	4.23591	2.28e-05	8.42e-05	1031.36	605.051	818.206	289.514	172.613	279.369	247.165	0.231999
DDB_G0292128	458.294	1.7272	0.537998	3.21042	0.00132542	0.00345047	1192.84	384.076	788.457	227.847	247.353	239.359	238.186	0.232005
DDB_G0269046	1322.2	1.72134	0.125727	13.691	1.15e-42	6.1e-41	2166.9	2378.11	2272.51	735.006	665.54	665.431	688.659	0.232563
DDB_G0292786	190.322	1.72332	0.186951	9.21802	3.03e-20	4.96e-19	348.996	305.156	327.076	97.9404	100.543	98.9723	99.1519	0.232626
DDB_G0287805	167.433	1.72159	0.331862	5.18767	2.13e-07	1.07e-06	364.623	210.453	287.538	79.3498	99.2082	83.5298	87.3626	0.233029
DDB_G0287303	219.439	1.71451	0.22451	7.63667	2.23e-14	2.29e-13	406.294	347.247	376.77	128.547	111.22	103.886	114.551	0.233149
DDB_G0278079	74.8105	1.71957	0.402095	4.27652	1.9e-05	7.14e-05	93.7601	163.101	128.43	38.5413	46.7124	31.9379	39.0639	0.233225
DDB_G0269444	784.943	1.71646	0.193428	8.87391	7.06e-19	1.06e-17	1526.21	1168.01	1347.11	396.749	444.88	388.87	410.166	0.23341
DDB_G0286467	74.8061	1.71777	0.366104	4.69202	2.71e-06	1.18e-05	114.596	142.055	128.326	38.5413	47.6022	31.2359	39.1265	0.233658
DDB_G0290989	100.728	1.72055	0.279979	6.14528	7.98e-10	5.33e-09	171.894	173.623	172.758	45.7962	58.2793	54.0487	52.7081	0.233773
DDB_G0293752	2684.63	1.71218	0.0785572	21.7953	2.57e-105	5.25e-103	4724.47	4482.64	4603.55	1394.52	1432.07	1389.47	1405.35	0.233878
DDB_G0293758	1578.51	1.71053	0.291782	5.86236	4.56e-09	2.81e-08	3349.32	2062.44	2705.88	733.646	849.721	897.419	826.929	0.234071
DDB_G0291239	944.589	1.70951	0.203861	8.38566	5.04e-17	6.59e-16	1885.62	1352.16	1618.89	500.811	504.939	479.419	495.056	0.234186
DDB_G0275455	936.753	1.70721	0.345995	4.93421	8.05e-07	3.75e-06	2104.39	1104.88	1604.63	460.456	494.262	519.78	491.499	0.234479
DDB_G0268090	94.7876	1.71063	0.312187	5.47949	4.27e-08	2.33e-07	161.476	163.101	162.288	46.9298	59.6139	42.8178	49.7872	0.234762
DDB_G0269708	2370.89	1.70364	0.49674	3.42965	0.000604362	0.00170308	5922.51	2193.97	4058.24	1066.46	1281.7	1389.82	1246	0.234906
DDB_G0274203	400.347	1.70243	0.249086	6.83471	8.22e-12	6.7e-11	823.006	547.177	685.091	206.763	198.416	226.373	210.517	0.235055
DDB_G0270006	408.573	1.69967	0.26537	6.4049	1.5e-10	1.08e-09	661.53	736.584	699.057	261.628	205.535	177.589	214.917	0.235146
DDB_G0272208	5415.55	1.69862	0.298809	5.68463	1.31e-08	7.63e-08	11569	6950.2	9259.58	2543.5	2988.7	3026.38	2852.86	0.235532
DDB_G0267418	24454.1	1.69522	0.300803	5.63563	1.74e-08	9.97e-08	50984.7	32578.1	41781.4	10676.6	13566.6	14464.7	12902.6	0.235949
DDB_G0295753	134.646	1.69189	0.548245	3.08601	0.00202862	0.00508675	317.743	142.055	229.899	63.9333	49.8266	99.6743	71.1447	0.236327
DDB_G0278313	370.967	1.69063	0.278237	6.07621	1.23e-09	8.06e-09	677.156	589.267	633.212	180.237	164.606	243.57	196.138	0.236496
DDB_G0277825	4189.24	1.68824	0.379158	4.4526	8.48e-06	3.39e-05	9599.99	4693.09	7146.54	2012.99	2262.66	2377.44	2217.7	0.236826
DDB_G0267892	89.0138	1.67842	0.425283	3.94659	7.93e-05	0.00026783	166.685	136.794	151.739	57.3586	31.5865	52.6449	47.1966	0.237245
DDB_G0293074	239.249	1.68206	0.37271	4.51305	6.39e-06	2.61e-05	541.725	273.588	407.657	141.696	117.448	121.785	126.977	0.237502
DDB_G0290233	799.496	1.6827	0.206214	8.15998	3.35e-16	4.06e-15	1177.21	1546.83	1362.02	399.243	470.238	403.962	424.481	0.237605
DDB_G0280921	711.268	1.68134	0.401208	4.19069	2.78e-05	0.000101817	760.499	1662.58	1211.54	361.835	399.057	372.375	377.756	0.237688
DDB_G0269150	1179.9	1.68221	0.145356	11.573	5.65e-31	1.8e-29	2125.23	1894.07	2009.65	590.136	681.111	608.925	626.724	0.237722
DDB_G0287363	2538.56	1.68022	0.4501	3.73299	0.000189222	0.000591681	6120.45	2525.43	4322.94	1212.47	1338.64	1495.82	1348.98	0.237834
DDB_G0279191	187.995	1.67921	0.561667	2.98968	0.00279268	0.00676593	161.476	478.78	320.128	98.3938	79.1886	122.136	99.9062	0.237853
DDB_G0293538	4058.09	1.67852	0.0765284	21.9333	1.25e-106	2.71e-104	6709.06	7108.04	6908.55	2187.79	2112.74	2172.83	2157.78	0.238
DDB_G0282141	14598.9	1.67715	0.154825	10.8325	2.41e-27	6.36e-26	22497.2	27190.5	24843.8	7201.79	8211.59	7893.57	7768.98	0.238219
DDB_G0285763	147.605	1.67728	0.339275	4.94371	7.67e-07	3.58e-06	312.534	189.407	250.971	66.2004	89.8658	80.0202	78.6955	0.238713
DDB_G0287055	883.565	1.67285	0.409025	4.08985	4.32e-05	0.000152762	2078.35	925.991	1502.17	469.751	467.124	476.611	471.162	0.238765
DDB_G0272422	170.877	1.67072	0.222237	7.51771	5.57e-14	5.55e-13	296.907	284.111	290.509	90.6855	82.3028	100.376	91.1215	0.238769
DDB_G0280397	63.2266	1.66642	0.492169	3.38587	0.000709532	0.00196631	78.1334	136.794	107.464	43.529	33.8109	23.8657	33.7352	0.23892
DDB_G0280535	5010.59	1.67062	0.412327	4.05169	5.08e-05	0.000177196	11688.8	5340.23	8514.5	2338.55	2790.29	2895.12	2674.65	0.23904
DDB_G0269162	318.128	1.67078	0.481358	3.47097	0.000518579	0.00148331	786.543	294.634	540.588	164.368	165.05	180.045	169.821	0.239047
DDB_G0276267	983.126	1.66857	0.378629	4.40687	1.05e-05	4.13e-05	2198.15	1141.71	1669.93	537.765	438.207	599.8	525.257	0.239277
DDB_G0281559	150.662	1.66853	0.524582	3.18069	0.00146927	0.00378831	380.249	131.533	255.891	77.7628	72.5154	91.2511	80.5098	0.239327
DDB_G0285117	93.9209	1.66493	0.322296	5.16583	2.39e-07	1.2e-06	203.147	115.749	159.448	52.8243	48.047	49.8371	50.2362	0.23958
DDB_G0275909	179.121	1.6552	0.201464	8.21586	2.11e-16	2.6e-15	302.116	305.156	303.636	101.341	89.4209	97.5685	96.1101	0.240428
DDB_G0268078	163.48	1.65973	0.282379	5.87766	4.16e-09	2.58e-08	343.787	210.453	277.12	90.9122	89.4209	82.8279	87.7203	0.240435
DDB_G0283315	779.51	1.65913	0.183084	9.06214	1.28e-19	2.01e-18	1463.7	1178.53	1321.12	425.542	449.329	380.447	418.439	0.240544
DDB_G0275533	502.654	1.65753	0.423121	3.91738	8.95e-05	0.000299962	1187.63	515.609	851.619	253.013	274.491	282.527	270.01	0.240731
DDB_G0277911	385.612	1.65587	0.424011	3.90525	9.41e-05	0.00031351	911.557	394.599	653.078	197.014	205.535	219.354	207.301	0.240941
DDB_G0278189	89.4989	1.65336	0.390161	4.23763	2.26e-05	8.36e-05	203.147	99.965	151.556	50.7839	42.7085	50.89	48.1275	0.241019
DDB_G0274381	4150.83	1.65344	0.186425	8.86919	7.37e-19	1.11e-17	7870.64	6182.04	7026.34	2027.27	2277.79	2396.39	2233.82	0.241229
DDB_G0286115	276.471	1.65163	0.346918	4.76086	1.93e-06	8.52e-06	614.65	320.94	467.795	145.324	142.806	158.636	148.922	0.241476
DDB_G0294026	1641.29	1.64745	0.0997161	16.5214	2.57e-61	2.24e-59	2729.46	2820.06	2774.76	871.488	858.174	927.251	885.638	0.241951
DDB_G0283937	665.076	1.64323	0.123535	13.3018	2.26e-40	1.13e-38	1140.75	1104.88	1122.81	343.018	371.03	365.706	359.918	0.24274
DDB_G0278259	714.868	1.64096	0.134486	12.2017	3.04e-34	1.12e-32	1166.79	1246.93	1206.86	379.519	368.361	412.736	386.872	0.242746
DDB_G0268140	478.685	1.64022	0.232461	7.05591	1.71e-12	1.49e-11	942.81	673.448	808.129	283.166	235.342	258.662	259.056	0.242747
DDB_G0283621	1970.05	1.64006	0.1707	9.6078	7.41e-22	1.39e-20	3739.99	2909.51	3324.75	1018.63	1074.83	1107.3	1066.92	0.242941
DDB_G0285907	137.79	1.6391	0.397468	4.12385	3.73e-05	0.000133354	317.743	147.317	232.53	79.8033	70.7359	73.3518	74.6303	0.242969
DDB_G0286035	317.695	1.63999	0.286566	5.72288	1.05e-08	6.18e-08	656.321	415.644	535.982	151.445	181.511	183.555	172.17	0.243126
DDB_G0275695	367.924	1.63932	0.16291	10.0627	8.07e-24	1.7e-22	567.77	673.448	620.609	189.986	207.314	201.103	199.468	0.243231
DDB_G0283175	174.975	1.63814	0.453733	3.61036	0.000305772	0.000915657	421.921	168.362	295.141	92.4992	96.9838	95.1117	94.8649	0.24324
DDB_G0278741	1768.92	1.63008	0.54536	2.98901	0.00279884	0.00677641	4536.95	1420.55	2978.75	963.534	982.295	941.29	962.373	0.244187
DDB_G0267686	490.998	1.62579	0.307562	5.28605	1.25e-07	6.48e-07	1052.2	599.79	825.993	277.271	270.932	254.801	267.668	0.244745
DDB_G0293168	635.512	1.62491	0.379504	4.28168	1.85e-05	6.99e-05	1422.03	715.539	1068.78	317.626	397.723	324.643	346.664	0.244915
DDB_G0282373	953.573	1.62383	0.482119	3.36811	0.000756866	0.00208129	2333.59	873.378	1603.48	520.308	485.364	555.228	520.3	0.244988
DDB_G0277355	7111.44	1.61611	0.241886	6.68129	2.37e-11	1.85e-10	11094.9	12779.7	11937.3	3389.37	3503.87	4789.28	3894.17	0.245976
DDB_G0270112	286.468	1.61494	0.449547	3.59238	0.000327674	0.000974372	677.156	284.111	480.634	138.976	176.617	155.478	157.024	0.246251
DDB_G0291726	408.798	1.61058	0.185901	8.66362	4.57e-18	6.46e-17	765.708	605.051	685.379	221.499	211.318	240.411	224.41	0.246661
DDB_G0282397	531.774	1.609	0.364627	4.41272	1.02e-05	4.02e-05	1182.42	599.79	891.105	266.162	296.735	313.763	292.22	0.246948
DDB_G0292594	2667.6	1.60781	0.331124	4.85561	1.2e-06	5.43e-06	5787.08	3151.53	4469.31	1361.42	1513.04	1524.95	1466.47	0.247056
DDB_G0271022	190.962	1.60733	0.363185	4.42564	9.62e-06	3.8e-05	218.774	420.905	319.839	92.7259	112.555	109.852	105.044	0.247231
DDB_G0281049	245.986	1.60427	0.474275	3.38257	0.000718122	0.00198762	229.191	594.529	411.86	146.911	134.354	124.944	135.403	0.247418
DDB_G0284549	2347.02	1.60481	0.421998	3.8029	0.000143014	0.000461982	5349.54	2509.65	3929.59	1449.83	1385.8	1040.26	1291.97	0.247429
DDB_G0272666	187.375	1.60299	0.340635	4.70589	2.53e-06	1.1e-05	401.085	226.237	313.661	107.916	88.976	112.66	103.184	0.247536
DDB_G0270176	332.406	1.60312	0.45794	3.50071	0.000464019	0.00133695	791.752	320.94	556.346	191.12	162.381	195.839	183.113	0.247631
DDB_G0289117	1420.31	1.6008	0.33775	4.73961	2.14e-06	9.41e-06	3068.04	1683.62	2375.83	769.92	709.584	870.395	783.3	0.247948
DDB_G0282627	853.044	1.5981	0.460431	3.47087	0.000518769	0.00148346	2047.1	804.981	1426.04	484.487	448.884	479.77	471.047	0.2483
DDB_G0276541	396.171	1.59364	0.208166	7.65565	1.92e-14	1.99e-13	770.917	552.438	661.677	228.981	214.432	214.089	219.167	0.248815
DDB_G0269226	845.565	1.58876	0.480128	3.30905	0.000936141	0.00252829	2005.42	815.504	1410.46	493.103	541.419	372.375	468.965	0.249525
DDB_G0285381	312.353	1.58255	0.265301	5.9651	2.44e-09	1.56e-08	593.814	447.212	520.513	187.266	143.251	190.223	173.58	0.250082
DDB_G0268472	870.552	1.57963	0.21655	7.29454	3e-13	2.81e-12	1687.68	1210.1	1448.89	457.735	522.734	474.506	484.992	0.250786
DDB_G0282103	913.544	1.57162	0.155045	10.1366	3.8e-24	8.2e-23	1604.34	1431.08	1517.71	479.046	493.817	559.439	510.767	0.251799
DDB_G0268888	264.153	1.57063	0.480992	3.2654	0.0010931	0.00290837	630.276	247.282	438.779	140.789	130.795	171.622	147.735	0.251887
DDB_G0285323	256.902	1.56887	0.263544	5.95297	2.63e-09	1.67e-08	411.503	441.95	426.727	142.15	118.338	170.569	143.686	0.251898
DDB_G0269588	513.542	1.56707	0.263363	5.95024	2.68e-09	1.69e-08	1041.78	662.926	852.352	301.529	292.286	269.191	287.669	0.252336
DDB_G0288541	1289.91	1.56638	0.3259	4.80633	1.54e-06	6.87e-06	2771.13	1510	2140.56	732.059	737.611	698.773	722.814	0.252434
DDB_G0293130	269.389	1.56569	0.351204	4.45807	8.27e-06	3.32e-05	583.396	310.418	446.907	138.749	145.921	168.464	151.044	0.252603
DDB_G0286363	412.566	1.56517	0.536373	2.91807	0.00352201	0.00837122	979.272	389.337	684.305	167.995	306.522	219.705	231.407	0.252707
DDB_G0289109	351.645	1.56464	0.201793	7.75372	8.92e-15	9.52e-14	677.156	489.302	583.229	193.16	195.747	202.858	197.255	0.252734
DDB_G0281441	405.318	1.56239	0.244173	6.39872	1.57e-10	1.12e-09	791.752	552.438	672.095	233.062	203.31	246.027	227.466	0.252864
DDB_G0276965	278.522	1.55954	0.415141	3.75665	0.000172203	0.000543233	286.489	636.619	461.554	163.007	140.137	166.358	156.501	0.253215
DDB_G0269474	1084.69	1.55746	0.114825	13.5638	6.57e-42	3.42e-40	1677.26	1915.12	1796.19	603.285	622.387	605.416	610.363	0.253625
DDB_G0281385	712.916	1.5566	0.488955	3.18353	0.00145491	0.00375392	1724.14	636.619	1180.38	411.259	366.136	426.423	401.273	0.253704
DDB_G0286357	2776.19	1.55604	0.188931	8.23601	1.78e-16	2.23e-15	5240.15	3951.25	4595.7	1469.11	1635.82	1584.61	1563.18	0.253809
DDB_G0278737	224.401	1.55249	0.238712	6.50362	7.84e-11	5.75e-10	421.921	320.94	371.43	141.923	117.893	119.328	126.381	0.253874
DDB_G0289943	671.154	1.55491	0.331536	4.69002	2.73e-06	1.18e-05	1432.45	789.197	1110.82	387	342.113	405.014	378.043	0.253913
DDB_G0269842	337.312	1.55149	0.302667	5.12606	2.96e-07	1.46e-06	458.383	657.664	558.024	200.415	152.149	217.95	190.171	0.254173
DDB_G0283681	72.7536	1.54427	0.421889	3.66036	0.00025186	0.000768814	145.849	94.7037	120.276	52.5976	36.925	33.6927	41.0718	0.254554
DDB_G0291342	91.9252	1.54918	0.271142	5.71354	1.11e-08	6.5e-08	156.267	147.317	151.792	47.8366	52.051	56.1545	52.014	0.255214
DDB_G0274841	287.017	1.54634	0.173632	8.90585	5.3e-19	8.04e-18	447.965	499.825	473.895	160.513	173.058	153.723	162.432	0.255264
DDB_G0267636	79.2372	1.53616	0.355285	4.32373	1.53e-05	5.87e-05	140.64	121.01	130.825	54.1846	36.4802	43.8707	44.8452	0.25528
DDB_G0277629	16329	1.54461	0.183211	8.43075	3.43e-17	4.56e-16	27065.4	26853.7	26959.6	7767.44	10206.9	9751.58	9241.97	0.255292
DDB_G0287693	136.134	1.54037	0.538403	2.861	0.00422301	0.00986323	338.578	110.488	224.533	83.204	77.854	70.5441	77.2007	0.255857
DDB_G0281783	863.906	1.5381	0.121785	12.6297	1.45e-36	5.99e-35	1323.06	1525.78	1424.42	499.45	482.695	488.544	490.23	0.256041
DDB_G0275451	763.328	1.53727	0.216783	7.0913	1.33e-12	1.16e-11	1474.12	1041.74	1257.93	407.178	445.77	447.832	433.593	0.256333
DDB_G0289029	472.238	1.53606	0.52736	2.91273	0.00358286	0.00850303	1166.79	389.337	778.065	245.304	275.826	283.931	268.354	0.25645
DDB_G0282341	78.0444	1.53351	0.470858	3.25684	0.0011266	0.00298067	72.9245	184.146	128.535	45.7962	48.047	39.3082	44.3838	0.256674
DDB_G0291372	339.578	1.53411	0.404882	3.78902	0.000151244	0.000486999	744.872	373.553	559.213	201.549	222.44	155.478	193.155	0.25673
DDB_G0280505	214.911	1.53203	0.346755	4.4182	9.95e-06	3.93e-05	244.818	462.996	353.907	133.081	114.334	119.328	122.248	0.25674
DDB_G0294633	218.188	1.53311	0.424205	3.61408	0.000301412	0.00090358	218.774	499.825	359.299	129.68	130.35	112.309	124.113	0.256744
DDB_G0272182	420.915	1.53226	0.266629	5.74677	9.1e-09	5.4e-08	854.259	531.393	692.826	231.021	244.684	243.219	239.642	0.256997
DDB_G0274981	76.317	1.5263	0.31597	4.83051	1.36e-06	6.12e-06	140.64	110.488	125.564	44.2092	37.8148	48.4333	43.4858	0.257237
DDB_G0292736	1152.56	1.52931	0.31179	4.90495	9.35e-07	4.31e-06	2229.41	1562.61	1896.01	566.784	577.454	826.524	656.921	0.25732
DDB_G0282115	545.808	1.52639	0.14932	10.2223	1.58e-24	3.49e-23	927.183	868.117	897.65	334.63	304.298	294.811	311.246	0.257463
DDB_G0269576	88.9509	1.52577	0.517886	2.94615	0.00321758	0.0077074	213.565	78.9197	146.242	59.6257	49.8266	42.8178	50.7567	0.25765
DDB_G0290177	2277.02	1.52479	0.214072	7.12277	1.06e-12	9.31e-12	3932.72	3551.39	3742.05	1281.61	1096.18	1523.19	1300.33	0.25788
DDB_G0288453	229.832	1.52412	0.436921	3.48832	0.000486068	0.00139755	223.983	531.393	377.688	131.947	121.452	140.386	131.262	0.257908
DDB_G0269874	498.069	1.52413	0.260351	5.85413	4.8e-09	2.95e-08	1000.11	636.619	818.364	297.222	286.503	269.893	284.539	0.257991
DDB_G0280491	1250.54	1.52335	0.330294	4.61211	3.99e-06	1.69e-05	2656.54	1452.12	2054.33	697.372	676.662	770.019	714.684	0.258101
DDB_G0273533	218.326	1.51993	0.250137	6.0764	1.23e-09	8.06e-09	359.414	357.769	358.592	129	103.657	141.79	124.816	0.2582
DDB_G0272825	39292.8	1.52186	0.200902	7.57511	3.59e-14	3.64e-13	69830.5	59221.4	64525.9	18922.9	23970.6	24518.8	22470.8	0.258295
DDB_G0277869	3273.92	1.52168	0.18963	8.02445	1.02e-15	1.19e-14	5995.44	4756.23	5375.83	1669.97	1954.8	1993.13	1872.64	0.258349
DDB_G0285463	280.355	1.52	0.242591	6.26572	3.71e-10	2.55e-09	546.934	373.553	460.244	161.874	148.145	171.271	160.43	0.258477
DDB_G0287869	387.788	1.50855	0.425981	3.54135	0.00039809	0.00116524	885.512	384.076	634.794	223.313	205.979	240.061	223.118	0.260071
DDB_G0293210	651.182	1.50597	0.246464	6.11032	9.94e-10	6.6e-09	984.481	1146.97	1065.72	439.598	306.522	378.341	374.82	0.260194
DDB_G0292820	586.356	1.50682	0.285202	5.28333	1.27e-07	6.57e-07	1198.05	720.8	959.423	331.682	324.318	356.932	337.644	0.260313
DDB_G0277071	487.138	1.50538	0.431172	3.49136	0.000480568	0.00138318	1114.7	478.78	796.742	258	305.188	279.018	280.735	0.260549
DDB_G0282881	895.617	1.50441	0.212105	7.0928	1.31e-12	1.15e-11	1718.94	1210.1	1464.52	498.317	526.738	523.992	516.349	0.260668
DDB_G0276481	76.7089	1.50446	0.360332	4.17522	2.98e-05	0.000108306	166.685	84.181	125.433	45.116	44.0431	43.5197	44.2263	0.260677
DDB_G0285243	286.083	1.5039	0.379444	3.96344	7.39e-05	0.000250451	630.276	305.156	467.716	161.647	177.507	155.829	164.994	0.260774
DDB_G0291916	426.102	1.49638	0.260177	5.75141	8.85e-09	5.26e-08	838.632	552.438	695.535	248.932	223.775	266.734	246.48	0.261652
DDB_G0277507	224.748	1.49824	0.307363	4.87451	1.09e-06	4.96e-06	296.907	436.689	366.798	105.875	144.586	139.684	130.049	0.261748
DDB_G0269992	168.47	1.49708	0.198755	7.53226	4.99e-14	5e-13	270.863	278.85	274.856	93.4061	99.2082	100.025	97.5465	0.261938
DDB_G0269916	17908.2	1.49265	0.154133	9.68415	3.52e-22	6.74e-21	29206.3	29200.3	29203.3	9038.63	11037.5	11058.6	10378.2	0.262199
DDB_G0275703	142.88	1.49222	0.225399	6.62037	3.58e-11	2.74e-10	255.236	210.453	232.844	78.6697	82.3028	87.7414	82.9046	0.262565
DDB_G0267616	104.233	1.49223	0.390002	3.8262	0.000130136	0.000423354	229.191	110.488	169.84	54.4113	64.9525	62.1209	60.4949	0.262639
DDB_G0277823	3217.53	1.48745	0.337108	4.41239	1.02e-05	4.03e-05	6792.4	3688.18	5240.29	1692.65	1917.43	1996.99	1869.02	0.262898
DDB_G0287075	788.754	1.4867	0.16026	9.2768	1.75e-20	2.93e-19	1411.61	1157.49	1284.55	464.537	429.309	480.823	458.223	0.262928
DDB_G0281985	2925.99	1.48718	0.411103	3.61754	0.000297413	0.00089402	6584.04	2946.34	4765.19	1620.55	1821.78	1657.26	1699.86	0.262931
DDB_G0289709	80.2682	1.48328	0.408785	3.6285	0.000285073	0.000861619	166.685	94.7037	130.694	49.4236	36.4802	54.0487	46.6508	0.263051
DDB_G0278215	131.846	1.49194	0.248795	5.99665	2.01e-09	1.29e-08	208.356	220.975	214.666	69.3744	85.417	75.1067	76.6327	0.263073
DDB_G0275733	461.821	1.48635	0.262924	5.65317	1.58e-08	9.07e-08	656.321	847.072	751.696	218.099	298.07	289.547	268.572	0.263236
DDB_G0289339	136.95	1.48182	0.268571	5.51741	3.44e-08	1.9e-07	171.894	273.588	222.741	78.443	81.8579	78.9673	79.7561	0.263659
DDB_G0277569	85.1315	1.47936	0.498512	2.96756	0.00300177	0.00723757	197.938	78.9197	138.429	53.051	39.5943	56.1545	49.6	0.263789
DDB_G0274349	194.433	1.48063	0.444891	3.32807	0.000874505	0.00237753	442.756	189.407	316.082	112.903	128.125	98.9723	113.334	0.263926
DDB_G0286889	167.177	1.48072	0.372416	3.97598	7.01e-05	0.000238559	364.623	178.885	271.754	90.6855	99.2082	102.482	97.4586	0.263964
DDB_G0275929	98.3661	1.47547	0.360479	4.09308	4.26e-05	0.00015084	114.596	205.191	159.893	60.986	48.9368	62.1209	57.3479	0.263982
DDB_G0273829	170.887	1.47763	0.392148	3.76804	0.000164532	0.000521568	229.191	326.201	277.696	87.2848	78.7438	133.016	99.6815	0.264142
DDB_G0289063	337.793	1.4782	0.320383	4.61386	3.95e-06	1.68e-05	708.41	389.337	548.874	197.241	203.755	190.223	197.073	0.264192
DDB_G0289723	477.609	1.47636	0.444862	3.31869	0.0009044	0.00245397	1099.08	452.473	775.775	274.55	262.924	299.023	278.832	0.264395
DDB_G0274859	9850.06	1.47587	0.376294	3.92212	8.78e-05	0.000294485	21294	10701.5	15997.7	5186.08	6512.6	5556.14	5751.6	0.26445
DDB_G0277731	124.237	1.47055	0.329627	4.46125	8.15e-06	3.27e-05	161.476	242.02	201.748	86.378	66.732	64.5777	72.5625	0.264527
DDB_G0292600	12847.6	1.47392	0.370071	3.98279	6.81e-05	0.000232614	27633.2	14079.3	20856.2	6562.23	8114.17	7849	7508.46	0.264712
DDB_G0274993	483.681	1.46948	0.47227	3.11152	0.00186126	0.00470342	432.338	1136.44	784.391	289.514	275.826	284.282	283.207	0.265275
DDB_G0291918	159.741	1.46753	0.20968	6.99888	2.58e-12	2.2e-11	281.28	236.759	259.02	97.4869	92.9799	90.1982	93.555	0.265348
DDB_G0284947	2674.11	1.46778	0.505203	2.90532	0.00366877	0.00869571	6427.78	2241.32	4334.55	1563.87	1614.02	1523.54	1567.15	0.265542
DDB_G0292400	127.866	1.46641	0.444703	3.29751	0.000975472	0.00262233	119.805	294.634	207.219	72.7751	73.8501	78.2653	74.9635	0.265656
DDB_G0282233	187.475	1.46816	0.211311	6.94785	3.71e-12	3.13e-11	265.654	341.985	303.82	104.288	110.33	115.117	109.912	0.26566
DDB_G0286411	179.736	1.46307	0.388948	3.76161	0.000168825	0.000533951	197.938	384.076	291.007	93.4061	98.3185	124.944	105.556	0.266177
DDB_G0275049	1035.99	1.46161	0.225152	6.49167	8.49e-11	6.21e-10	1369.94	1983.52	1676.73	577.667	612.155	636.652	608.824	0.26638
DDB_G0281409	3337.58	1.46116	0.373621	3.91081	9.2e-05	0.000307307	7224.74	3577.69	5401.22	1901.22	2148.33	1835.9	1961.82	0.266441
DDB_G0269670	1552.65	1.46091	0.274381	5.3244	1.01e-07	5.3e-07	3099.29	1925.64	2512.47	914.11	967.169	857.058	912.779	0.266486
DDB_G0279717	9604.36	1.45877	0.0943916	15.4545	7.04e-54	5.32e-52	14668.3	16399.5	15533.9	5592.35	5731.83	5629.84	5651.34	0.266759
DDB_G0274105	3697.42	1.45674	0.348426	4.18092	2.9e-05	0.000105872	7792.51	4161.7	5977.1	2194.59	2392.56	1945.75	2177.64	0.267039
DDB_G0270816	121.584	1.44967	0.299302	4.8435	1.28e-06	5.75e-06	182.311	210.453	196.382	82.9772	72.5154	59.6642	71.719	0.267507
DDB_G0274353	396.624	1.45172	0.31003	4.6825	2.83e-06	1.23e-05	812.588	468.257	640.422	242.357	213.542	246.378	234.092	0.267683
DDB_G0269976	208.864	1.44927	0.408801	3.54517	0.000392361	0.00114999	463.592	210.453	337.022	123.559	113	133.718	123.425	0.268055
DDB_G0284839	405.092	1.44904	0.277481	5.2221	1.77e-07	9.01e-07	812.588	494.564	653.576	243.717	246.464	228.128	239.436	0.268122
DDB_G0276571	257.78	1.44861	0.255229	5.67574	1.38e-08	8.02e-08	484.427	347.247	415.837	142.376	141.472	173.377	152.408	0.268209
DDB_G0267788	241.439	1.44798	0.3545	4.08456	4.42e-05	0.000155979	515.681	263.066	389.373	136.708	151.704	140.035	142.816	0.268356
DDB_G0294050	1363.79	1.44643	0.267938	5.39836	6.73e-08	3.6e-07	2635.7	1762.54	2199.12	791.231	716.257	913.213	806.9	0.268428
DDB_G0290669	122.054	1.44386	0.388092	3.72041	0.0001989	0.000619136	151.058	242.02	196.539	64.3867	92.0902	60.7171	72.398	0.2692
DDB_G0287097	247.381	1.4376	0.400954	3.58545	0.000336499	0.000998999	312.534	484.041	398.287	195.881	113.889	130.559	146.776	0.269283
DDB_G0293540	520.571	1.43743	0.143748	9.99963	1.53e-23	3.14e-22	812.588	862.856	837.722	306.97	292.286	328.153	309.137	0.269551
DDB_G0270784	2420.17	1.43768	0.341247	4.21302	2.52e-05	9.26e-05	5094.3	2693.79	3894.05	1454.82	1499.69	1358.24	1437.58	0.269633
DDB_G0293874	2916.2	1.43608	0.275632	5.21013	1.89e-07	9.58e-07	5792.29	3588.22	4690.25	1703.53	1848.48	1648.49	1733.5	0.269857
DDB_G0282357	353.51	1.4362	0.208497	6.88834	5.64e-12	4.69e-11	489.636	647.142	568.389	196.788	228.668	205.315	210.257	0.270029
DDB_G0271690	383.316	1.43466	0.493903	2.90473	0.00367567	0.00871018	906.348	326.201	616.275	232.382	230.893	220.757	228.011	0.270063
DDB_G0289719	467.132	1.43418	0.231421	6.19727	5.74e-10	3.88e-09	823.006	678.71	750.858	248.252	260.7	324.994	277.982	0.27019
DDB_G0283411	1379.58	1.43194	0.321031	4.46045	8.18e-06	3.28e-05	2838.85	1594.18	2216.51	790.551	895.543	778.793	821.629	0.270438
DDB_G0271552	1203.26	1.43155	0.424593	3.37158	0.000747383	0.00205624	2687.79	1178.53	1933.16	788.284	653.084	708.6	716.656	0.270455
DDB_G0288187	710.15	1.43159	0.310315	4.61335	3.96e-06	1.68e-05	1234.51	1047	1140.75	417.153	533.411	318.677	423.08	0.27054
DDB_G0270934	73.3192	1.4288	0.29427	4.85541	1.2e-06	5.43e-06	119.805	115.749	117.777	43.529	40.4841	47.0294	43.6808	0.270541
DDB_G0272318	1217.91	1.42827	0.341447	4.18299	2.88e-05	0.000105154	2536.73	1373.2	1954.97	651.802	736.721	791.077	726.533	0.270943
DDB_G0292804	852.461	1.42167	0.392865	3.61872	0.000296061	0.000890928	864.677	1867.77	1366.22	502.398	512.947	514.516	509.953	0.271805
DDB_G0284773	971.459	1.4217	0.431653	3.29362	0.00098907	0.002655	2177.32	936.514	1556.92	590.816	524.069	628.58	581.155	0.271813
DDB_G0271682	209.138	1.42022	0.217152	6.54021	6.14e-11	4.57e-10	333.369	336.724	335.047	131.041	134.354	110.203	125.199	0.272027
DDB_G0284917	511.102	1.42046	0.217074	6.54369	6e-11	4.47e-10	932.392	705.016	818.704	279.311	299.404	339.384	306.033	0.272093
DDB_G0289085	3045.31	1.41867	0.136014	10.4303	1.8e-25	4.22e-24	4854.69	4898.28	4876.49	1650.25	1851.59	1971.73	1824.52	0.272276
DDB_G0281825	760.465	1.4122	0.271727	5.19712	2.02e-07	1.02e-06	1489.74	941.775	1215.76	422.141	455.557	493.107	456.935	0.273173
DDB_G0281569	1818.7	1.41132	0.197859	7.13296	9.82e-13	8.67e-12	2578.4	3235.71	2907.06	971.695	1101.08	1206.62	1093.13	0.27327
DDB_G0287839	268.075	1.41005	0.476352	2.96009	0.00307546	0.00740069	619.859	236.759	428.309	148.271	174.393	161.093	161.252	0.273512
DDB_G0267382	11567.6	1.40566	0.269087	5.22383	1.75e-07	8.94e-07	14611	22318.5	18464.7	6109.03	7381.89	7417.66	6969.53	0.274021
DDB_G0282151	198.798	1.40507	0.384844	3.65101	0.000261213	0.000794507	203.147	431.428	317.287	115.171	124.566	119.679	119.805	0.274096
DDB_G0277635	11693.9	1.40382	0.407619	3.44396	0.000573269	0.00162458	11782.5	25533.2	18657.8	6206.29	7255.55	7692.11	7051.32	0.274273
DDB_G0279159	3412.06	1.40339	0.146301	9.59244	8.6e-22	1.61e-20	5203.69	5682.22	5442.95	1842.05	2171.46	2160.9	2058.13	0.274378
DDB_G0276153	1103	1.40238	0.323316	4.33748	1.44e-05	5.54e-05	2255.45	1262.72	1759.08	610.994	719.371	666.484	665.616	0.274515
DDB_G0267966	2310.35	1.4018	0.246858	5.67858	1.36e-08	7.89e-08	4448.4	2920.03	3684.21	1329.68	1404.49	1449.14	1394.43	0.274568
DDB_G0285375	90.4342	1.40149	0.285918	4.90171	9.5e-07	4.37e-06	140.64	147.317	143.978	50.7839	61.8383	51.592	54.7381	0.275458
DDB_G0280319	5180.46	1.39364	0.180607	7.71643	1.2e-14	1.26e-13	7912.31	8575.94	8244.13	3065.85	3592.41	2755.78	3138.01	0.275696
DDB_G0289047	917.866	1.39235	0.438359	3.17627	0.0014918	0.00384282	2052.3	868.117	1460.21	574.493	595.694	498.722	556.303	0.275874
DDB_G0272106	6178.18	1.39098	0.188123	7.39399	1.42e-13	1.38e-12	11006.4	8644.34	9825.37	3407.05	3763.68	4069.45	3746.73	0.276061
DDB_G0292002	220.144	1.39048	0.416746	3.33652	0.000848358	0.00231328	484.427	215.714	350.071	136.028	121.007	143.545	133.527	0.276112
DDB_G0285429	1666.15	1.39047	0.383765	3.62324	0.000290933	0.00087789	3594.14	1704.67	2649.4	992.78	1041.02	998.146	1010.65	0.27613
DDB_G0275717	174.464	1.38962	0.206428	6.73174	1.68e-11	1.33e-10	312.534	242.02	277.277	105.422	108.106	104.237	105.922	0.276414
DDB_G0287407	678.689	1.38388	0.336069	4.11785	3.82e-05	0.000136699	750.081	1404.77	1077.43	395.842	435.982	406.769	412.865	0.277036
DDB_G0268702	915.511	1.38069	0.460059	3.00112	0.00268992	0.0065457	2083.56	820.765	1452.16	539.579	590.356	543.295	557.743	0.277497
DDB_G0280975	734.285	1.37813	0.195986	7.03179	2.04e-12	1.75e-11	1343.9	983.866	1163.88	432.797	444.435	466.433	447.888	0.277886
DDB_G0279013	1217.18	1.37391	0.475932	2.88677	0.00389222	0.00917018	2791.97	1062.79	1927.38	694.198	733.607	803.36	743.722	0.278433
DDB_G0272104	1116.61	1.3735	0.172541	7.96044	1.71e-15	1.95e-14	1557.46	1978.25	1767.86	639.106	695.792	712.46	682.453	0.278517
DDB_G0269354	127.416	1.36693	0.310322	4.40487	1.06e-05	4.16e-05	171.894	231.498	201.696	91.5924	66.2871	75.8086	77.896	0.278606
DDB_G0269174	218.729	1.36827	0.282006	4.85193	1.22e-06	5.52e-06	265.654	426.166	345.91	128.773	126.346	146.704	133.941	0.27913
DDB_G0275045	38112.9	1.36862	0.411595	3.32515	0.000883695	0.00239956	38670.8	81871.3	60271.1	19276.6	25209.6	25536.3	23340.8	0.279157
DDB_G0269994	168.647	1.36801	0.306379	4.46508	8e-06	3.22e-05	338.578	194.669	266.623	101.114	98.3185	110.554	103.329	0.279303
DDB_G0269742	472.753	1.36544	0.32203	4.24009	2.23e-05	8.27e-05	531.307	962.821	747.064	301.983	294.955	272.7	289.88	0.279552
DDB_G0271812	2056.51	1.3646	0.477266	2.8592	0.00424711	0.00991322	4724.47	1773.06	3248.77	1250.55	1229.2	1305.24	1261.67	0.279722
DDB_G0286311	92.874	1.36968	0.32312	4.23893	2.25e-05	8.31e-05	119.805	173.623	146.714	48.9702	64.0627	57.9093	56.9807	0.279736
DDB_G0281865	2294.44	1.36409	0.114823	11.8799	1.51e-32	5.11e-31	3885.84	3361.98	3623.91	1376.15	1432.07	1416.15	1408.12	0.279832
DDB_G0271106	576.84	1.36342	0.11698	11.6552	2.16e-31	7.05e-30	911.557	910.207	910.882	350.046	355.459	356.932	354.146	0.279951
DDB_G0293934	1534.45	1.36212	0.17822	7.64291	2.12e-14	2.18e-13	2708.63	2136.09	2422.36	885.317	925.795	1016.4	942.503	0.280101
DDB_G0270034	619.229	1.3599	0.198925	6.83624	8.13e-12	6.63e-11	817.797	1136.44	977.12	376.572	376.813	388.519	380.635	0.280341
DDB_G0288315	581.041	1.35979	0.452679	3.00387	0.00266567	0.00649099	1307.43	526.131	916.782	381.559	341.223	348.86	357.214	0.280389
DDB_G0271610	193.792	1.35872	0.377991	3.59459	0.000324909	0.000966409	411.503	199.93	305.716	127.867	110.33	119.328	119.175	0.280484
DDB_G0268430	66.4954	1.35439	0.397577	3.4066	0.000657777	0.00183532	67.7156	142.055	104.886	44.4359	38.2597	40.0101	40.9019	0.280558
DDB_G0292152	142.959	1.3585	0.362263	3.75003	0.000176815	0.000556195	156.267	294.634	225.45	77.5361	88.0862	98.2704	87.9642	0.280664
DDB_G0284861	17842	1.35653	0.393166	3.45028	0.000559998	0.00159106	18085.3	38170.8	28128.1	9847.99	11516.2	11589.6	10984.6	0.280845
DDB_G0275921	116.127	1.35936	0.291132	4.66921	3.02e-06	1.3e-05	223.983	142.055	183.019	65.5203	76.0745	73.0009	71.5319	0.281012
DDB_G0271884	1020.18	1.35541	0.299792	4.52116	6.15e-06	2.52e-05	2015.84	1199.58	1607.71	595.35	693.123	596.993	628.489	0.281052
DDB_G0280897	907.856	1.3532	0.343125	3.94375	8.02e-05	0.000270526	1771.02	1089.09	1430.06	649.535	593.025	436.601	559.72	0.281298
DDB_G0274897	419.606	1.35338	0.411538	3.2886	0.00100688	0.00270085	916.766	405.121	660.943	255.733	254.026	266.383	258.714	0.281316
DDB_G0285071	263.036	1.35135	0.352163	3.83728	0.000124404	0.000405784	281.28	547.177	414.229	169.809	151.259	165.656	162.241	0.281439
DDB_G0286191	156.564	1.35224	0.43888	3.08111	0.00206231	0.00516109	145.849	347.247	246.548	87.965	97.8736	103.886	96.5748	0.281458
DDB_G0288731	127.887	1.35259	0.261528	5.1719	2.32e-07	1.16e-06	244.818	157.839	201.329	77.9895	80.5233	78.2653	78.9261	0.281622
DDB_G0280895	84.9448	1.34249	0.407168	3.29714	0.000976735	0.00262508	104.178	163.101	133.639	61.4394	39.1494	56.8564	52.4818	0.281976
DDB_G0290123	378.733	1.34863	0.345921	3.89867	9.67e-05	0.000321385	786.543	405.121	595.832	235.329	232.227	234.445	234	0.281985
DDB_G0292118	204.654	1.34866	0.196659	6.85784	6.99e-12	5.75e-11	343.787	299.895	321.841	120.158	125.011	134.42	126.53	0.282199
DDB_G0288875	997.854	1.3467	0.22386	6.01583	1.79e-09	1.16e-08	1854.37	1283.76	1569.06	591.95	608.151	651.041	617.047	0.282258
DDB_G0286727	1100.21	1.34575	0.416124	3.23402	0.00122061	0.00320483	2344	1115.4	1729.7	768.333	721.595	551.718	680.549	0.282356
DDB_G0279937	143.141	1.34389	0.282905	4.75034	2.03e-06	8.94e-06	239.609	210.453	225.031	99.7541	92.535	73.3518	88.547	0.282376
DDB_G0290085	479.798	1.34209	0.14281	9.3977	5.58e-21	9.79e-20	718.828	789.197	754.012	310.825	284.278	295.864	296.989	0.282577
DDB_G0269158	1685.1	1.33814	0.234525	5.70574	1.16e-08	6.79e-08	3094.08	2193.97	2644.03	1003.44	966.724	1167.31	1045.82	0.283433
DDB_G0284381	827.065	1.33816	0.172024	7.77895	7.31e-15	7.85e-14	1437.66	1157.49	1297.57	516.907	546.313	476.962	513.394	0.283492
DDB_G0275787	208.288	1.33786	0.379782	3.5227	0.000427172	0.0012405	421.921	231.498	326.709	132.174	151.259	104.588	129.34	0.28361
DDB_G0276273	289.156	1.33427	0.263971	5.05461	4.31e-07	2.08e-06	348.996	557.699	453.348	186.585	180.176	172.324	179.695	0.28386
DDB_G0289715	143.656	1.33325	0.218455	6.10309	1.04e-09	6.89e-09	218.774	231.498	225.136	91.5924	92.535	83.8808	89.3361	0.284083
DDB_G0279263	250.585	1.33168	0.182112	7.31242	2.62e-13	2.47e-12	411.503	373.553	392.528	152.125	149.035	166.709	155.956	0.28434
DDB_G0280955	107.054	1.33372	0.305408	4.36701	1.26e-05	4.88e-05	135.431	199.93	167.681	64.6134	75.6296	59.6642	66.6357	0.284384
DDB_G0279927	193.777	1.32689	0.339903	3.90373	9.47e-05	0.000315299	395.876	210.453	303.164	121.292	112.11	129.155	120.852	0.285018
DDB_G0278709	157.536	1.32484	0.386976	3.42357	0.000618036	0.00173673	171.894	320.94	246.417	95.6732	82.3028	116.872	98.2825	0.285125
DDB_G0291870	31330.3	1.32515	0.233464	5.67603	1.38e-08	8.01e-08	55245.5	42742.9	48994.2	16520.4	22374.3	19768.5	19554.4	0.285263
DDB_G0274249	82.1174	1.32077	0.279927	4.71827	2.38e-06	1.04e-05	109.387	147.317	128.352	52.3709	50.2714	51.241	51.2944	0.28553
DDB_G0288417	100.612	1.32306	0.266156	4.97099	6.66e-07	3.13e-06	130.222	184.146	157.184	60.3059	64.5076	63.8758	62.8964	0.285788
DDB_G0290141	14465.6	1.32114	0.163225	8.09402	5.77e-16	6.84e-15	20335.5	24859.7	22597.6	8285.71	9415.44	9431.5	9044.22	0.285831
DDB_G0267442	85.2932	1.32199	0.426067	3.10278	0.00191714	0.00482915	187.52	78.9197	133.22	52.8243	55.61	51.592	53.3421	0.285921
DDB_G0292442	149.237	1.31694	0.219749	5.9929	2.06e-09	1.32e-08	213.565	252.543	233.054	95.2198	87.6414	97.2175	93.3595	0.286016
[truncated: 190 more rows]

## Sheet: Down_Ka_genes
Gene_ID	baseMean	log2FoldChange	lfcSE	stat	pvalue	padj	KA_1	KA_2	KA_mean	AX4_veg_1	AX4_veg_2	AX4_veg_3	AX_mean	index
[truncated: 1,366 more rows]
