# Supplementary material for: Mutant resources for functional genomics in Dictyostelium discoideum using REMI-seq technology
Source: BMC Biol. 2021 Aug 24;19:172. doi: 10.1186/s12915-021-01108-y (PMC8386026; doi:10.1186/s12915-021-01108-y)
Supplement: Supplementary file 14 — Additional file 14. GO term analysis of genes associated with growth in axenic culture or on bacteria [file 12915_2021_1108_MOESM14_ESM.xlsx]

## Sheet: Library_vs_Genome_under_BP
Gene_ID	GO_code	expCount	oddsRatio	p_value	GO_term	start_library	Name
DDB_G0267374	GO:0044351	1394.85	0.713855	7.86683e-11	macropinocytosis	0	acpA
DDB_G0267380	GO:0044351	1394.85	0.713855	7.86683e-11	macropinocytosis	1	argE
DDB_G0267382	GO:0044351	1394.85	0.713855	7.86683e-11	macropinocytosis	0	corA
DDB_G0267386	GO:0044351	1394.85	0.713855	7.86683e-11	macropinocytosis	1	cysB
DDB_G0267390	GO:0044351	1394.85	0.713855	7.86683e-11	macropinocytosis	0	psmB6
DDB_G0267392	GO:0044351	1394.85	0.713855	7.86683e-11	macropinocytosis	1	plbG
DDB_G0267394	GO:0044351	1394.85	0.713855	7.86683e-11	macropinocytosis	0	vps46
DDB_G0267400	GO:0044351	1394.85	0.713855	7.86683e-11	macropinocytosis	1	hspD
DDB_G0267402	GO:0044351	1394.85	0.713855	7.86683e-11	macropinocytosis	0	H3a
DDB_G0267406	GO:0044351	1394.85	0.713855	7.86683e-11	macropinocytosis	1	lmpA
DDB_G0267408	GO:0044351	1394.85	0.713855	7.86683e-11	macropinocytosis	1	psmA3
DDB_G0267410	GO:0044351	1394.85	0.713855	7.86683e-11	macropinocytosis	1	pslA
DDB_G0267418	GO:0044351	1394.85	0.713855	7.86683e-11	macropinocytosis	0	sahA
DDB_G0267420	GO:0044351	1394.85	0.713855	7.86683e-11	macropinocytosis	0	sodA
DDB_G0267426	GO:0044351	1394.85	0.713855	7.86683e-11	macropinocytosis	1	cshA
DDB_G0267428	GO:0044351	1394.85	0.713855	7.86683e-11	macropinocytosis	0	abcH2
DDB_G0267430	GO:0044351	1394.85	0.713855	7.86683e-11	macropinocytosis	1	abcG20
DDB_G0267438	GO:0044351	1394.85	0.713855	7.86683e-11	macropinocytosis	1	abcA2
DDB_G0267440	GO:0044351	1394.85	0.713855	7.86683e-11	macropinocytosis	1	lmpC
DDB_G0267444	GO:0044351	1394.85	0.713855	7.86683e-11	macropinocytosis	1	phg1A
DDB_G0267448	GO:0044351	1394.85	0.713855	7.86683e-11	macropinocytosis	1	DDB_G0267448
DDB_G0267450	GO:0044351	1394.85	0.713855	7.86683e-11	macropinocytosis	1	pakC
DDB_G0267454	GO:0044351	1394.85	0.713855	7.86683e-11	macropinocytosis	1	ancA
DDB_G0267480	GO:0044351	1394.85	0.713855	7.86683e-11	macropinocytosis	1	nup93
DDB_G0267482	GO:0044351	1394.85	0.713855	7.86683e-11	macropinocytosis	0	DDB_G0267482
DDB_G0267492	GO:0044351	1394.85	0.713855	7.86683e-11	macropinocytosis	1	DDB_G0267492
DDB_G0267500	GO:0044351	1394.85	0.713855	7.86683e-11	macropinocytosis	0	DDB_G0267500
DDB_G0267502	GO:0044351	1394.85	0.713855	7.86683e-11	macropinocytosis	1	DDB_G0267502
DDB_G0267504	GO:0044351	1394.85	0.713855	7.86683e-11	macropinocytosis	1	DDB_G0267504
DDB_G0267524	GO:0044351	1394.85	0.713855	7.86683e-11	macropinocytosis	1	ssr3
DDB_G0267528	GO:0044351	1394.85	0.713855	7.86683e-11	macropinocytosis	1	DDB_G0267528
DDB_G0267534	GO:0044351	1394.85	0.713855	7.86683e-11	macropinocytosis	0	DDB_G0267534
DDB_G0267552	GO:0044351	1394.85	0.713855	7.86683e-11	macropinocytosis	0	DDB_G0267552
DDB_G0267560	GO:0044351	1394.85	0.713855	7.86683e-11	macropinocytosis	1	uprt
DDB_G0267570	GO:0044351	1394.85	0.713855	7.86683e-11	macropinocytosis	1	DDB_G0267570
DDB_G0267582	GO:0044351	1394.85	0.713855	7.86683e-11	macropinocytosis	1	DDB_G0267582
DDB_G0267594	GO:0044351	1394.85	0.713855	7.86683e-11	macropinocytosis	0	pfdn2
DDB_G0267622	GO:0044351	1394.85	0.713855	7.86683e-11	macropinocytosis	0	srp9
DDB_G0267646	GO:0044351	1394.85	0.713855	7.86683e-11	macropinocytosis	0	sec20
DDB_G0267668	GO:0044351	1394.85	0.713855	7.86683e-11	macropinocytosis	1	hspL
DDB_G0267704	GO:0044351	1394.85	0.713855	7.86683e-11	macropinocytosis	1	mcfT
DDB_G0267712	GO:0044351	1394.85	0.713855	7.86683e-11	macropinocytosis	1	DDB_G0267712
DDB_G0267728	GO:0044351	1394.85	0.713855	7.86683e-11	macropinocytosis	1	uduA3
DDB_G0267734	GO:0044351	1394.85	0.713855	7.86683e-11	macropinocytosis	1	DDB_G0267734
DDB_G0267756	GO:0044351	1394.85	0.713855	7.86683e-11	macropinocytosis	1	NA
DDB_G0267786	GO:0044351	1394.85	0.713855	7.86683e-11	macropinocytosis	1	DDB_G0267786
DDB_G0267796	GO:0044351	1394.85	0.713855	7.86683e-11	macropinocytosis	0	DDB_G0267796
DDB_G0267804	GO:0044351	1394.85	0.713855	7.86683e-11	macropinocytosis	1	NA
DDB_G0267848	GO:0044351	1394.85	0.713855	7.86683e-11	macropinocytosis	1	DDB_G0267848
DDB_G0267850	GO:0044351	1394.85	0.713855	7.86683e-11	macropinocytosis	1	DDB_G0267850
DDB_G0267914	GO:0044351	1394.85	0.713855	7.86683e-11	macropinocytosis	1	DDB_G0267914
DDB_G0267918	GO:0044351	1394.85	0.713855	7.86683e-11	macropinocytosis	0	DDB_G0267918
DDB_G0267928	GO:0044351	1394.85	0.713855	7.86683e-11	macropinocytosis	1	tmem144B
DDB_G0267950	GO:0044351	1394.85	0.713855	7.86683e-11	macropinocytosis	1	copE
DDB_G0267982	GO:0044351	1394.85	0.713855	7.86683e-11	macropinocytosis	1	copA
DDB_G0267984	GO:0044351	1394.85	0.713855	7.86683e-11	macropinocytosis	1	DDB_G0267984
DDB_G0268008	GO:0044351	1394.85	0.713855	7.86683e-11	macropinocytosis	1	DDB_G0268008
DDB_G0268018	GO:0044351	1394.85	0.713855	7.86683e-11	macropinocytosis	1	DDB_G0268018
DDB_G0268020	GO:0044351	1394.85	0.713855	7.86683e-11	macropinocytosis	1	bkdB
DDB_G0268026	GO:0044351	1394.85	0.713855	7.86683e-11	macropinocytosis	1	DDB_G0268026
DDB_G0268034	GO:0044351	1394.85	0.713855	7.86683e-11	macropinocytosis	1	DDB_G0268034
DDB_G0268038	GO:0044351	1394.85	0.713855	7.86683e-11	macropinocytosis	0	mtpn
DDB_G0268044	GO:0044351	1394.85	0.713855	7.86683e-11	macropinocytosis	1	NA
DDB_G0268048	GO:0044351	1394.85	0.713855	7.86683e-11	macropinocytosis	0	DDB_G0268048
DDB_G0268054	GO:0044351	1394.85	0.713855	7.86683e-11	macropinocytosis	1	NA
DDB_G0268056	GO:0044351	1394.85	0.713855	7.86683e-11	macropinocytosis	1	sptA
DDB_G0268060	GO:0044351	1394.85	0.713855	7.86683e-11	macropinocytosis	1	DDB_G0268060
DDB_G0268064	GO:0044351	1394.85	0.713855	7.86683e-11	macropinocytosis	1	DDB_G0268064
DDB_G0268068	GO:0044351	1394.85	0.713855	7.86683e-11	macropinocytosis	0	rab6
DDB_G0268080	GO:0044351	1394.85	0.713855	7.86683e-11	macropinocytosis	1	rpc3
DDB_G0268084	GO:0044351	1394.85	0.713855	7.86683e-11	macropinocytosis	1	wdr91
DDB_G0268088	GO:0044351	1394.85	0.713855	7.86683e-11	macropinocytosis	1	lvsG
DDB_G0268098	GO:0044351	1394.85	0.713855	7.86683e-11	macropinocytosis	0	nop58
DDB_G0268104	GO:0044351	1394.85	0.713855	7.86683e-11	macropinocytosis	1	gabT
DDB_G0268114	GO:0044351	1394.85	0.713855	7.86683e-11	macropinocytosis	0	DDB_G0268114
DDB_G0268116	GO:0044351	1394.85	0.713855	7.86683e-11	macropinocytosis	0	NA
DDB_G0268118	GO:0044351	1394.85	0.713855	7.86683e-11	macropinocytosis	1	DDB_G0268118
DDB_G0268130	GO:0044351	1394.85	0.713855	7.86683e-11	macropinocytosis	1	NA
DDB_G0268132	GO:0044351	1394.85	0.713855	7.86683e-11	macropinocytosis	1	DDB_G0268132
DDB_G0268138	GO:0044351	1394.85	0.713855	7.86683e-11	macropinocytosis	1	DDB_G0268138
DDB_G0268140	GO:0044351	1394.85	0.713855	7.86683e-11	macropinocytosis	1	NA
DDB_G0268146	GO:0044351	1394.85	0.713855	7.86683e-11	macropinocytosis	1	NA
DDB_G0268148	GO:0044351	1394.85	0.713855	7.86683e-11	macropinocytosis	1	NA
DDB_G0268182	GO:0044351	1394.85	0.713855	7.86683e-11	macropinocytosis	0	NA
DDB_G0268206	GO:0044351	1394.85	0.713855	7.86683e-11	macropinocytosis	1	NA
DDB_G0268220	GO:0044351	1394.85	0.713855	7.86683e-11	macropinocytosis	0	DDB_G0268220
DDB_G0268222	GO:0044351	1394.85	0.713855	7.86683e-11	macropinocytosis	1	DDB_G0268222
DDB_G0268236	GO:0044351	1394.85	0.713855	7.86683e-11	macropinocytosis	1	DDB_G0268236
DDB_G0268270	GO:0044351	1394.85	0.713855	7.86683e-11	macropinocytosis	1	DDB_G0268270
DDB_G0268302	GO:0044351	1394.85	0.713855	7.86683e-11	macropinocytosis	1	rpl38
DDB_G0268306	GO:0044351	1394.85	0.713855	7.86683e-11	macropinocytosis	1	rpb9
DDB_G0268330	GO:0044351	1394.85	0.713855	7.86683e-11	macropinocytosis	1	sgmD
DDB_G0268332	GO:0044351	1394.85	0.713855	7.86683e-11	macropinocytosis	0	uduA1
DDB_G0268360	GO:0044351	1394.85	0.713855	7.86683e-11	macropinocytosis	0	DDB_G0268360
DDB_G0268384	GO:0044351	1394.85	0.713855	7.86683e-11	macropinocytosis	0	NA
DDB_G0268396	GO:0044351	1394.85	0.713855	7.86683e-11	macropinocytosis	1	2015-09-01
DDB_G0268402	GO:0044351	1394.85	0.713855	7.86683e-11	macropinocytosis	1	rab24
DDB_G0268420	GO:0044351	1394.85	0.713855	7.86683e-11	macropinocytosis	1	DDB_G0268420
DDB_G0268448	GO:0044351	1394.85	0.713855	7.86683e-11	macropinocytosis	0	fam45
DDB_G0268478	GO:0044351	1394.85	0.713855	7.86683e-11	macropinocytosis	0	DDB_G0268478
DDB_G0268496	GO:0044351	1394.85	0.713855	7.86683e-11	macropinocytosis	0	DDB_G0268496
DDB_G0268498	GO:0044351	1394.85	0.713855	7.86683e-11	macropinocytosis	1	areB
DDB_G0268518	GO:0044351	1394.85	0.713855	7.86683e-11	macropinocytosis	1	DDB_G0268518
DDB_G0268538	GO:0044351	1394.85	0.713855	7.86683e-11	macropinocytosis	1	psmA5
DDB_G0268548	GO:0044351	1394.85	0.713855	7.86683e-11	macropinocytosis	0	pikF
DDB_G0268574	GO:0044351	1394.85	0.713855	7.86683e-11	macropinocytosis	0	eIF4e
DDB_G0268592	GO:0044351	1394.85	0.713855	7.86683e-11	macropinocytosis	0	dlpA
DDB_G0268620	GO:0044351	1394.85	0.713855	7.86683e-11	macropinocytosis	0	pkbA
DDB_G0268632	GO:0044351	1394.85	0.713855	7.86683e-11	macropinocytosis	1	abpA
DDB_G0268646	GO:0044351	1394.85	0.713855	7.86683e-11	macropinocytosis	1	DDB_G0268646
DDB_G0268652	GO:0044351	1394.85	0.713855	7.86683e-11	macropinocytosis	1	ippB
DDB_G0268664	GO:0044351	1394.85	0.713855	7.86683e-11	macropinocytosis	1	aatA
DDB_G0268702	GO:0044351	1394.85	0.713855	7.86683e-11	macropinocytosis	1	copD
DDB_G0268758	GO:0044351	1394.85	0.713855	7.86683e-11	macropinocytosis	0	ola1
DDB_G0268760	GO:0044351	1394.85	0.713855	7.86683e-11	macropinocytosis	0	rabQ
DDB_G0268790	GO:0044351	1394.85	0.713855	7.86683e-11	macropinocytosis	1	DDB_G0268790
DDB_G0268810	GO:0044351	1394.85	0.713855	7.86683e-11	macropinocytosis	1	DDB_G0268810
DDB_G0268816	GO:0044351	1394.85	0.713855	7.86683e-11	macropinocytosis	1	DDB_G0268816
DDB_G0268870	GO:0044351	1394.85	0.713855	7.86683e-11	macropinocytosis	1	DDB_G0268870
DDB_G0268878	GO:0044351	1394.85	0.713855	7.86683e-11	macropinocytosis	1	NA
DDB_G0268904	GO:0044351	1394.85	0.713855	7.86683e-11	macropinocytosis	1	NA
DDB_G0268948	GO:0044351	1394.85	0.713855	7.86683e-11	macropinocytosis	1	DDB_G0268948
DDB_G0268966	GO:0044351	1394.85	0.713855	7.86683e-11	macropinocytosis	1	lip1
DDB_G0268988	GO:0044351	1394.85	0.713855	7.86683e-11	macropinocytosis	1	DDB_G0268988
DDB_G0268996	GO:0044351	1394.85	0.713855	7.86683e-11	macropinocytosis	0	DDB_G0268996
DDB_G0269016	GO:0044351	1394.85	0.713855	7.86683e-11	macropinocytosis	1	cyp524A1
DDB_G0269038	GO:0044351	1394.85	0.713855	7.86683e-11	macropinocytosis	1	atp5D
DDB_G0269046	GO:0044351	1394.85	0.713855	7.86683e-11	macropinocytosis	1	DDB_G0269046
DDB_G0269048	GO:0044351	1394.85	0.713855	7.86683e-11	macropinocytosis	0	NA
DDB_G0269050	GO:0044351	1394.85	0.713855	7.86683e-11	macropinocytosis	0	NA
DDB_G0269086	GO:0044351	1394.85	0.713855	7.86683e-11	macropinocytosis	1	DDB_G0269086
DDB_G0269100	GO:0044351	1394.85	0.713855	7.86683e-11	macropinocytosis	1	abpC
DDB_G0269102	GO:0044351	1394.85	0.713855	7.86683e-11	macropinocytosis	1	arcD
DDB_G0269104	GO:0044351	1394.85	0.713855	7.86683e-11	macropinocytosis	1	calB
DDB_G0269110	GO:0044351	1394.85	0.713855	7.86683e-11	macropinocytosis	1	tspA
DDB_G0269118	GO:0044351	1394.85	0.713855	7.86683e-11	macropinocytosis	1	cxeA
DDB_G0269120	GO:0044351	1394.85	0.713855	7.86683e-11	macropinocytosis	1	cypB
DDB_G0269122	GO:0044351	1394.85	0.713855	7.86683e-11	macropinocytosis	0	cysA
DDB_G0269136	GO:0044351	1394.85	0.713855	7.86683e-11	macropinocytosis	0	efaAII
DDB_G0269138	GO:0044351	1394.85	0.713855	7.86683e-11	macropinocytosis	1	fttB
DDB_G0269140	GO:0044351	1394.85	0.713855	7.86683e-11	macropinocytosis	1	gapA
DDB_G0269144	GO:0044351	1394.85	0.713855	7.86683e-11	macropinocytosis	1	hspB
DDB_G0269146	GO:0044351	1394.85	0.713855	7.86683e-11	macropinocytosis	0	ifdA
DDB_G0269148	GO:0044351	1394.85	0.713855	7.86683e-11	macropinocytosis	1	lkhA
DDB_G0269150	GO:0044351	1394.85	0.713855	7.86683e-11	macropinocytosis	1	lvsA
DDB_G0269154	GO:0044351	1394.85	0.713855	7.86683e-11	macropinocytosis	1	modA
DDB_G0269156	GO:0044351	1394.85	0.713855	7.86683e-11	macropinocytosis	1	mvpA
DDB_G0269158	GO:0044351	1394.85	0.713855	7.86683e-11	macropinocytosis	1	npcA
DDB_G0269160	GO:0044351	1394.85	0.713855	7.86683e-11	macropinocytosis	1	nxnA
DDB_G0269168	GO:0044351	1394.85	0.713855	7.86683e-11	macropinocytosis	0	vps26
DDB_G0269170	GO:0044351	1394.85	0.713855	7.86683e-11	macropinocytosis	1	pmpA
DDB_G0269174	GO:0044351	1394.85	0.713855	7.86683e-11	macropinocytosis	1	rab1C
DDB_G0269186	GO:0044351	1394.85	0.713855	7.86683e-11	macropinocytosis	1	snpC
DDB_G0269192	GO:0044351	1394.85	0.713855	7.86683e-11	macropinocytosis	0	tifA
DDB_G0269194	GO:0044351	1394.85	0.713855	7.86683e-11	macropinocytosis	1	trfA
DDB_G0269196	GO:0044351	1394.85	0.713855	7.86683e-11	macropinocytosis	0	tubB
DDB_G0269202	GO:0044351	1394.85	0.713855	7.86683e-11	macropinocytosis	1	gdcA
DDB_G0269216	GO:0044351	1394.85	0.713855	7.86683e-11	macropinocytosis	1	cypE
DDB_G0269226	GO:0044351	1394.85	0.713855	7.86683e-11	macropinocytosis	1	cas1
DDB_G0269234	GO:0044351	1394.85	0.713855	7.86683e-11	macropinocytosis	1	act8
DDB_G0269236	GO:0044351	1394.85	0.713855	7.86683e-11	macropinocytosis	0	rab7A
DDB_G0269238	GO:0044351	1394.85	0.713855	7.86683e-11	macropinocytosis	0	rab11A
DDB_G0269240	GO:0044351	1394.85	0.713855	7.86683e-11	macropinocytosis	1	racH
DDB_G0269242	GO:0044351	1394.85	0.713855	7.86683e-11	macropinocytosis	1	fcsA
DDB_G0269286	GO:0044351	1394.85	0.713855	7.86683e-11	macropinocytosis	1	DDB_G0269286
DDB_G0269290	GO:0044351	1394.85	0.713855	7.86683e-11	macropinocytosis	0	nap1
DDB_G0269334	GO:0044351	1394.85	0.713855	7.86683e-11	macropinocytosis	0	NA
DDB_G0269342	GO:0044351	1394.85	0.713855	7.86683e-11	macropinocytosis	0	DDB_G0269342
DDB_G0269372	GO:0044351	1394.85	0.713855	7.86683e-11	macropinocytosis	1	NA
DDB_G0269380	GO:0044351	1394.85	0.713855	7.86683e-11	macropinocytosis	1	DDB_G0269380
DDB_G0269382	GO:0044351	1394.85	0.713855	7.86683e-11	macropinocytosis	1	pepD
DDB_G0269400	GO:0044351	1394.85	0.713855	7.86683e-11	macropinocytosis	0	NA
DDB_G0269410	GO:0044351	1394.85	0.713855	7.86683e-11	macropinocytosis	0	DDB_G0269410
DDB_G0269414	GO:0044351	1394.85	0.713855	7.86683e-11	macropinocytosis	1	ebp
DDB_G0269416	GO:0044351	1394.85	0.713855	7.86683e-11	macropinocytosis	1	rab32B
DDB_G0269444	GO:0044351	1394.85	0.713855	7.86683e-11	macropinocytosis	0	hemB
DDB_G0269460	GO:0044351	1394.85	0.713855	7.86683e-11	macropinocytosis	1	NA
DDB_G0269470	GO:0044351	1394.85	0.713855	7.86683e-11	macropinocytosis	1	mcfF
DDB_G0269472	GO:0044351	1394.85	0.713855	7.86683e-11	macropinocytosis	0	psmB2
DDB_G0269474	GO:0044351	1394.85	0.713855	7.86683e-11	macropinocytosis	1	fcsB
DDB_G0269488	GO:0044351	1394.85	0.713855	7.86683e-11	macropinocytosis	0	DDB_G0269488
DDB_G0269502	GO:0044351	1394.85	0.713855	7.86683e-11	macropinocytosis	1	nup160
DDB_G0269512	GO:0044351	1394.85	0.713855	7.86683e-11	macropinocytosis	0	DDB_G0269512
DDB_G0269526	GO:0044351	1394.85	0.713855	7.86683e-11	macropinocytosis	1	argD
DDB_G0269588	GO:0044351	1394.85	0.713855	7.86683e-11	macropinocytosis	1	DDB_G0269588
DDB_G0269602	GO:0044351	1394.85	0.713855	7.86683e-11	macropinocytosis	1	slc35b2
DDB_G0269616	GO:0044351	1394.85	0.713855	7.86683e-11	macropinocytosis	0	aplG
DDB_G0269644	GO:0044351	1394.85	0.713855	7.86683e-11	macropinocytosis	1	DDB_G0269644
DDB_G0269652	GO:0044351	1394.85	0.713855	7.86683e-11	macropinocytosis	1	NA
DDB_G0269664	GO:0044351	1394.85	0.713855	7.86683e-11	macropinocytosis	0	DDB_G0269664
DDB_G0269670	GO:0044351	1394.85	0.713855	7.86683e-11	macropinocytosis	1	NA
DDB_G0269708	GO:0044351	1394.85	0.713855	7.86683e-11	macropinocytosis	0	DDB_G0269708
DDB_G0269712	GO:0044351	1394.85	0.713855	7.86683e-11	macropinocytosis	0	ahsa
DDB_G0269716	GO:0044351	1394.85	0.713855	7.86683e-11	macropinocytosis	1	DDB_G0269716
DDB_G0269724	GO:0044351	1394.85	0.713855	7.86683e-11	macropinocytosis	0	DDB_G0269724
DDB_G0269734	GO:0044351	1394.85	0.713855	7.86683e-11	macropinocytosis	1	NA
DDB_G0269740	GO:0044351	1394.85	0.713855	7.86683e-11	macropinocytosis	1	DDB_G0269740
DDB_G0269742	GO:0044351	1394.85	0.713855	7.86683e-11	macropinocytosis	0	cdsA
DDB_G0269750	GO:0044351	1394.85	0.713855	7.86683e-11	macropinocytosis	1	DDB_G0269750
DDB_G0269756	GO:0044351	1394.85	0.713855	7.86683e-11	macropinocytosis	1	DDB_G0269756
DDB_G0269762	GO:0044351	1394.85	0.713855	7.86683e-11	macropinocytosis	1	DDB_G0269762
DDB_G0269766	GO:0044351	1394.85	0.713855	7.86683e-11	macropinocytosis	1	DDB_G0269766
DDB_G0269768	GO:0044351	1394.85	0.713855	7.86683e-11	macropinocytosis	1	cnrI
DDB_G0269772	GO:0044351	1394.85	0.713855	7.86683e-11	macropinocytosis	0	psmB3
DDB_G0269790	GO:0044351	1394.85	0.713855	7.86683e-11	macropinocytosis	1	gaa
DDB_G0269814	GO:0044351	1394.85	0.713855	7.86683e-11	macropinocytosis	1	ncbp1
DDB_G0269878	GO:0044351	1394.85	0.713855	7.86683e-11	macropinocytosis	0	fbl
DDB_G0269890	GO:0044351	1394.85	0.713855	7.86683e-11	macropinocytosis	1	DDB_G0269890
DDB_G0269908	GO:0044351	1394.85	0.713855	7.86683e-11	macropinocytosis	1	DDB_G0269908
DDB_G0269912	GO:0044351	1394.85	0.713855	7.86683e-11	macropinocytosis	1	redB
DDB_G0269916	GO:0044351	1394.85	0.713855	7.86683e-11	macropinocytosis	1	atp5b
DDB_G0269924	GO:0044351	1394.85	0.713855	7.86683e-11	macropinocytosis	1	vps18
DDB_G0269932	GO:0044351	1394.85	0.713855	7.86683e-11	macropinocytosis	0	uap56
DDB_G0269942	GO:0044351	1394.85	0.713855	7.86683e-11	macropinocytosis	1	DDB_G0269942
DDB_G0269948	GO:0044351	1394.85	0.713855	7.86683e-11	macropinocytosis	1	tnpo
DDB_G0269950	GO:0044351	1394.85	0.713855	7.86683e-11	macropinocytosis	1	serC
DDB_G0269976	GO:0044351	1394.85	0.713855	7.86683e-11	macropinocytosis	1	NA
DDB_G0270018	GO:0044351	1394.85	0.713855	7.86683e-11	macropinocytosis	0	DDB_G0270018
DDB_G0270022	GO:0044351	1394.85	0.713855	7.86683e-11	macropinocytosis	0	DDB_G0270022
DDB_G0270026	GO:0044351	1394.85	0.713855	7.86683e-11	macropinocytosis	0	NA
DDB_G0270028	GO:0044351	1394.85	0.713855	7.86683e-11	macropinocytosis	0	DDB_G0270028
DDB_G0270036	GO:0044351	1394.85	0.713855	7.86683e-11	macropinocytosis	1	ppp2r4
DDB_G0270062	GO:0044351	1394.85	0.713855	7.86683e-11	macropinocytosis	1	NA
DDB_G0270070	GO:0044351	1394.85	0.713855	7.86683e-11	macropinocytosis	1	DDB_G0270070
DDB_G0270074	GO:0044351	1394.85	0.713855	7.86683e-11	macropinocytosis	1	DDB_G0270074
DDB_G0270098	GO:0044351	1394.85	0.713855	7.86683e-11	macropinocytosis	1	sqstm1
DDB_G0270106	GO:0044351	1394.85	0.713855	7.86683e-11	macropinocytosis	1	DDB_G0270106
DDB_G0270116	GO:0044351	1394.85	0.713855	7.86683e-11	macropinocytosis	1	NA
DDB_G0270120	GO:0044351	1394.85	0.713855	7.86683e-11	macropinocytosis	1	sdhB
DDB_G0270152	GO:0044351	1394.85	0.713855	7.86683e-11	macropinocytosis	0	maspS
DDB_G0270188	GO:0044351	1394.85	0.713855	7.86683e-11	macropinocytosis	0	psmD6
DDB_G0270192	GO:0044351	1394.85	0.713855	7.86683e-11	macropinocytosis	1	DDB_G0270192
DDB_G0270196	GO:0044351	1394.85	0.713855	7.86683e-11	macropinocytosis	0	DDB_G0270196
DDB_G0270204	GO:0044351	1394.85	0.713855	7.86683e-11	macropinocytosis	1	crtp3
DDB_G0270212	GO:0044351	1394.85	0.713855	7.86683e-11	macropinocytosis	1	DDB_G0270212
DDB_G0270256	GO:0044351	1394.85	0.713855	7.86683e-11	macropinocytosis	1	DDB_G0270256
DDB_G0270260	GO:0044351	1394.85	0.713855	7.86683e-11	macropinocytosis	0	nhp6
DDB_G0270270	GO:0044351	1394.85	0.713855	7.86683e-11	macropinocytosis	1	gpsn2
DDB_G0270272	GO:0044351	1394.85	0.713855	7.86683e-11	macropinocytosis	1	uae1
DDB_G0270296	GO:0044351	1394.85	0.713855	7.86683e-11	macropinocytosis	0	dcd1A
DDB_G0270298	GO:0044351	1394.85	0.713855	7.86683e-11	macropinocytosis	0	pctA
DDB_G0270312	GO:0044351	1394.85	0.713855	7.86683e-11	macropinocytosis	0	DDB_G0270312
DDB_G0270314	GO:0044351	1394.85	0.713855	7.86683e-11	macropinocytosis	1	crip
DDB_G0270316	GO:0044351	1394.85	0.713855	7.86683e-11	macropinocytosis	0	rpsA
DDB_G0270320	GO:0044351	1394.85	0.713855	7.86683e-11	macropinocytosis	0	nup54
DDB_G0270324	GO:0044351	1394.85	0.713855	7.86683e-11	macropinocytosis	1	DDB_G0270324
DDB_G0270352	GO:0044351	1394.85	0.713855	7.86683e-11	macropinocytosis	1	DDB_G0270352
DDB_G0270356	GO:0044351	1394.85	0.713855	7.86683e-11	macropinocytosis	1	erg2
DDB_G0270380	GO:0044351	1394.85	0.713855	7.86683e-11	macropinocytosis	0	rpl30
DDB_G0270382	GO:0044351	1394.85	0.713855	7.86683e-11	macropinocytosis	1	DDB_G0270382
DDB_G0270384	GO:0044351	1394.85	0.713855	7.86683e-11	macropinocytosis	0	tsn
DDB_G0270390	GO:0044351	1394.85	0.713855	7.86683e-11	macropinocytosis	1	DDB_G0270390
DDB_G0270398	GO:0044351	1394.85	0.713855	7.86683e-11	macropinocytosis	1	raptor
DDB_G0270404	GO:0044351	1394.85	0.713855	7.86683e-11	macropinocytosis	1	docB
DDB_G0270412	GO:0044351	1394.85	0.713855	7.86683e-11	macropinocytosis	1	DDB_G0270412
DDB_G0270418	GO:0044351	1394.85	0.713855	7.86683e-11	macropinocytosis	0	top2
DDB_G0270420	GO:0044351	1394.85	0.713855	7.86683e-11	macropinocytosis	0	DDB_G0270420
DDB_G0270424	GO:0044351	1394.85	0.713855	7.86683e-11	macropinocytosis	1	rpl35a
DDB_G0270438	GO:0044351	1394.85	0.713855	7.86683e-11	macropinocytosis	0	DDB_G0270438
DDB_G0270470	GO:0044351	1394.85	0.713855	7.86683e-11	macropinocytosis	1	NA
DDB_G0270482	GO:0044351	1394.85	0.713855	7.86683e-11	macropinocytosis	0	gfm1
DDB_G0270488	GO:0044351	1394.85	0.713855	7.86683e-11	macropinocytosis	1	DDB_G0270488
DDB_G0270490	GO:0044351	1394.85	0.713855	7.86683e-11	macropinocytosis	1	DDB_G0270490
DDB_G0270510	GO:0044351	1394.85	0.713855	7.86683e-11	macropinocytosis	0	spc2
DDB_G0270562	GO:0044351	1394.85	0.713855	7.86683e-11	macropinocytosis	1	acy1
DDB_G0270578	GO:0044351	1394.85	0.713855	7.86683e-11	macropinocytosis	1	NA
DDB_G0270618	GO:0044351	1394.85	0.713855	7.86683e-11	macropinocytosis	1	NA
DDB_G0270658	GO:0044351	1394.85	0.713855	7.86683e-11	macropinocytosis	1	acbA
DDB_G0270670	GO:0044351	1394.85	0.713855	7.86683e-11	macropinocytosis	1	psaB
DDB_G0270682	GO:0044351	1394.85	0.713855	7.86683e-11	macropinocytosis	1	tspD
DDB_G0270686	GO:0044351	1394.85	0.713855	7.86683e-11	macropinocytosis	0	DDB_G0270686
DDB_G0270690	GO:0044351	1394.85	0.713855	7.86683e-11	macropinocytosis	0	DDB_G0270690
DDB_G0270694	GO:0044351	1394.85	0.713855	7.86683e-11	macropinocytosis	0	DDB_G0270694
DDB_G0270708	GO:0044351	1394.85	0.713855	7.86683e-11	macropinocytosis	1	DDB_G0270708
DDB_G0270720	GO:0044351	1394.85	0.713855	7.86683e-11	macropinocytosis	1	DDB_G0270720
DDB_G0270752	GO:0044351	1394.85	0.713855	7.86683e-11	macropinocytosis	1	DDB_G0270752
DDB_G0270754	GO:0044351	1394.85	0.713855	7.86683e-11	macropinocytosis	1	vps16
DDB_G0270800	GO:0044351	1394.85	0.713855	7.86683e-11	macropinocytosis	0	DDB_G0270800
DDB_G0270834	GO:0044351	1394.85	0.713855	7.86683e-11	macropinocytosis	0	sgmA
DDB_G0270838	GO:0044351	1394.85	0.713855	7.86683e-11	macropinocytosis	0	H3b
DDB_G0270870	GO:0044351	1394.85	0.713855	7.86683e-11	macropinocytosis	1	atp9b
DDB_G0270902	GO:0044351	1394.85	0.713855	7.86683e-11	macropinocytosis	1	DDB_G0270902
DDB_G0270910	GO:0044351	1394.85	0.713855	7.86683e-11	macropinocytosis	1	DDB_G0270910
DDB_G0270922	GO:0044351	1394.85	0.713855	7.86683e-11	macropinocytosis	0	NA
DDB_G0270934	GO:0044351	1394.85	0.713855	7.86683e-11	macropinocytosis	1	DDB_G0270934
DDB_G0270984	GO:0044351	1394.85	0.713855	7.86683e-11	macropinocytosis	1	rpl36a
DDB_G0270992	GO:0044351	1394.85	0.713855	7.86683e-11	macropinocytosis	1	sec31
DDB_G0271022	GO:0044351	1394.85	0.713855	7.86683e-11	macropinocytosis	1	adcC
DDB_G0271040	GO:0044351	1394.85	0.713855	7.86683e-11	macropinocytosis	1	ints2
DDB_G0271084	GO:0044351	1394.85	0.713855	7.86683e-11	macropinocytosis	1	DDB_G0271084
DDB_G0271086	GO:0044351	1394.85	0.713855	7.86683e-11	macropinocytosis	0	NA
DDB_G0271106	GO:0044351	1394.85	0.713855	7.86683e-11	macropinocytosis	0	sod2
DDB_G0271120	GO:0044351	1394.85	0.713855	7.86683e-11	macropinocytosis	1	DDB_G0271120
DDB_G0271122	GO:0044351	1394.85	0.713855	7.86683e-11	macropinocytosis	0	ufd1
DDB_G0271126	GO:0044351	1394.85	0.713855	7.86683e-11	macropinocytosis	1	plbB
DDB_G0271142	GO:0044351	1394.85	0.713855	7.86683e-11	macropinocytosis	1	proC
DDB_G0271144	GO:0044351	1394.85	0.713855	7.86683e-11	macropinocytosis	0	cnxA
DDB_G0271148	GO:0044351	1394.85	0.713855	7.86683e-11	macropinocytosis	1	rps25
DDB_G0271242	GO:0044351	1394.85	0.713855	7.86683e-11	macropinocytosis	1	DDB_G0271242
DDB_G0271250	GO:0044351	1394.85	0.713855	7.86683e-11	macropinocytosis	1	NA
DDB_G0271270	GO:0044351	1394.85	0.713855	7.86683e-11	macropinocytosis	1	DDB_G0271270
DDB_G0271272	GO:0044351	1394.85	0.713855	7.86683e-11	macropinocytosis	1	DDB_G0271272
DDB_G0271282	GO:0044351	1394.85	0.713855	7.86683e-11	macropinocytosis	1	csn7
DDB_G0271298	GO:0044351	1394.85	0.713855	7.86683e-11	macropinocytosis	0	rpl27
DDB_G0271312	GO:0044351	1394.85	0.713855	7.86683e-11	macropinocytosis	1	sf3b5
DDB_G0271334	GO:0044351	1394.85	0.713855	7.86683e-11	macropinocytosis	1	DDB_G0271334
DDB_G0271344	GO:0044351	1394.85	0.713855	7.86683e-11	macropinocytosis	0	idhA
DDB_G0271358	GO:0044351	1394.85	0.713855	7.86683e-11	macropinocytosis	1	DDB_G0271358
DDB_G0271374	GO:0044351	1394.85	0.713855	7.86683e-11	macropinocytosis	0	DDB_G0271374
DDB_G0271514	GO:0044351	1394.85	0.713855	7.86683e-11	macropinocytosis	1	rpc5
DDB_G0271546	GO:0044351	1394.85	0.713855	7.86683e-11	macropinocytosis	1	DDB_G0271546
DDB_G0271548	GO:0044351	1394.85	0.713855	7.86683e-11	macropinocytosis	0	NA
DDB_G0271552	GO:0044351	1394.85	0.713855	7.86683e-11	macropinocytosis	1	DDB_G0271552
DDB_G0271564	GO:0044351	1394.85	0.713855	7.86683e-11	macropinocytosis	1	pdhX
DDB_G0271630	GO:0044351	1394.85	0.713855	7.86683e-11	macropinocytosis	0	sac1
DDB_G0271664	GO:0044351	1394.85	0.713855	7.86683e-11	macropinocytosis	1	DDB_G0271664
DDB_G0271668	GO:0044351	1394.85	0.713855	7.86683e-11	macropinocytosis	0	rpl36
DDB_G0271678	GO:0044351	1394.85	0.713855	7.86683e-11	macropinocytosis	1	pckA
DDB_G0271720	GO:0044351	1394.85	0.713855	7.86683e-11	macropinocytosis	0	DDB_G0271720
DDB_G0271736	GO:0044351	1394.85	0.713855	7.86683e-11	macropinocytosis	1	rabC
DDB_G0271738	GO:0044351	1394.85	0.713855	7.86683e-11	macropinocytosis	1	tubC
DDB_G0271774	GO:0044351	1394.85	0.713855	7.86683e-11	macropinocytosis	1	uqcrh
DDB_G0271790	GO:0044351	1394.85	0.713855	7.86683e-11	macropinocytosis	0	tmem14B
DDB_G0271812	GO:0044351	1394.85	0.713855	7.86683e-11	macropinocytosis	1	DDB_G0271812
DDB_G0271814	GO:0044351	1394.85	0.713855	7.86683e-11	macropinocytosis	1	DDB_G0271814
DDB_G0271842	GO:0044351	1394.85	0.713855	7.86683e-11	macropinocytosis	1	scsC
DDB_G0271848	GO:0044351	1394.85	0.713855	7.86683e-11	macropinocytosis	1	porA
DDB_G0271856	GO:0044351	1394.85	0.713855	7.86683e-11	macropinocytosis	1	vps52C
DDB_G0271862	GO:0044351	1394.85	0.713855	7.86683e-11	macropinocytosis	1	eif2s1
DDB_G0271866	GO:0044351	1394.85	0.713855	7.86683e-11	macropinocytosis	1	DDB_G0271866
DDB_G0271882	GO:0044351	1394.85	0.713855	7.86683e-11	macropinocytosis	1	vatF
DDB_G0271892	GO:0044351	1394.85	0.713855	7.86683e-11	macropinocytosis	1	gst4
DDB_G0271894	GO:0044351	1394.85	0.713855	7.86683e-11	macropinocytosis	0	DDB_G0271894
DDB_G0271904	GO:0044351	1394.85	0.713855	7.86683e-11	macropinocytosis	1	DDB_G0271904
DDB_G0271942	GO:0044351	1394.85	0.713855	7.86683e-11	macropinocytosis	1	arl5
DDB_G0271958	GO:0044351	1394.85	0.713855	7.86683e-11	macropinocytosis	1	DDB_G0271958
DDB_G0271968	GO:0044351	1394.85	0.713855	7.86683e-11	macropinocytosis	1	DDB_G0271968
DDB_G0271976	GO:0044351	1394.85	0.713855	7.86683e-11	macropinocytosis	0	rpl32
DDB_G0271984	GO:0044351	1394.85	0.713855	7.86683e-11	macropinocytosis	0	rab5A
DDB_G0272004	GO:0044351	1394.85	0.713855	7.86683e-11	macropinocytosis	1	p2xA
DDB_G0272012	GO:0044351	1394.85	0.713855	7.86683e-11	macropinocytosis	1	DDB_G0272012
DDB_G0272022	GO:0044351	1394.85	0.713855	7.86683e-11	macropinocytosis	1	rpc34
DDB_G0272028	GO:0044351	1394.85	0.713855	7.86683e-11	macropinocytosis	0	tpp1_ps
DDB_G0272036	GO:0044351	1394.85	0.713855	7.86683e-11	macropinocytosis	0	rpb10
DDB_G0272038	GO:0044351	1394.85	0.713855	7.86683e-11	macropinocytosis	1	rgfA
DDB_G0272076	GO:0044351	1394.85	0.713855	7.86683e-11	macropinocytosis	0	eif3L
DDB_G0272078	GO:0044351	1394.85	0.713855	7.86683e-11	macropinocytosis	1	eif3A
DDB_G0272104	GO:0044351	1394.85	0.713855	7.86683e-11	macropinocytosis	1	acpB
DDB_G0272106	GO:0044351	1394.85	0.713855	7.86683e-11	macropinocytosis	1	arpB
DDB_G0272112	GO:0044351	1394.85	0.713855	7.86683e-11	macropinocytosis	1	myoJ
DDB_G0272114	GO:0044351	1394.85	0.713855	7.86683e-11	macropinocytosis	1	orfR1062
DDB_G0272118	GO:0044351	1394.85	0.713855	7.86683e-11	macropinocytosis	0	ppp6c
DDB_G0272138	GO:0044351	1394.85	0.713855	7.86683e-11	macropinocytosis	0	rab2B
DDB_G0272152	GO:0044351	1394.85	0.713855	7.86683e-11	macropinocytosis	0	DDB_G0272152
DDB_G0272190	GO:0044351	1394.85	0.713855	7.86683e-11	macropinocytosis	0	fam49
DDB_G0272192	GO:0044351	1394.85	0.713855	7.86683e-11	macropinocytosis	1	cln7
DDB_G0272196	GO:0044351	1394.85	0.713855	7.86683e-11	macropinocytosis	1	NA
DDB_G0272200	GO:0044351	1394.85	0.713855	7.86683e-11	macropinocytosis	0	NA
DDB_G0272208	GO:0044351	1394.85	0.713855	7.86683e-11	macropinocytosis	1	idhC
DDB_G0272210	GO:0044351	1394.85	0.713855	7.86683e-11	macropinocytosis	1	idhM
DDB_G0272232	GO:0044351	1394.85	0.713855	7.86683e-11	macropinocytosis	0	DDB_G0272232
DDB_G0272236	GO:0044351	1394.85	0.713855	7.86683e-11	macropinocytosis	0	aspS1
DDB_G0272246	GO:0044351	1394.85	0.713855	7.86683e-11	macropinocytosis	1	prsB
DDB_G0272248	GO:0044351	1394.85	0.713855	7.86683e-11	macropinocytosis	1	act16
DDB_G0272250	GO:0044351	1394.85	0.713855	7.86683e-11	macropinocytosis	0	rps23
DDB_G0272266	GO:0044351	1394.85	0.713855	7.86683e-11	macropinocytosis	1	ndufa9
DDB_G0272296	GO:0044351	1394.85	0.713855	7.86683e-11	macropinocytosis	0	sarA
DDB_G0272308	GO:0044351	1394.85	0.713855	7.86683e-11	macropinocytosis	0	rps29
DDB_G0272318	GO:0044351	1394.85	0.713855	7.86683e-11	macropinocytosis	0	DDB_G0272318
DDB_G0272324	GO:0044351	1394.85	0.713855	7.86683e-11	macropinocytosis	1	sbds
DDB_G0272342	GO:0044351	1394.85	0.713855	7.86683e-11	macropinocytosis	1	DDB_G0272342
DDB_G0272344	GO:0044351	1394.85	0.713855	7.86683e-11	macropinocytosis	1	htt
DDB_G0272346	GO:0044351	1394.85	0.713855	7.86683e-11	macropinocytosis	1	mcfQ
DDB_G0272368	GO:0044351	1394.85	0.713855	7.86683e-11	macropinocytosis	1	ndm
DDB_G0272394	GO:0044351	1394.85	0.713855	7.86683e-11	macropinocytosis	0	ndufa5
DDB_G0272398	GO:0044351	1394.85	0.713855	7.86683e-11	macropinocytosis	1	NA
DDB_G0272440	GO:0044351	1394.85	0.713855	7.86683e-11	macropinocytosis	1	DDB_G0272440
DDB_G0272458	GO:0044351	1394.85	0.713855	7.86683e-11	macropinocytosis	1	DDB_G0272458
DDB_G0272476	GO:0044351	1394.85	0.713855	7.86683e-11	macropinocytosis	0	DDB_G0272476
DDB_G0272492	GO:0044351	1394.85	0.713855	7.86683e-11	macropinocytosis	1	DDB_G0272492
DDB_G0272504	GO:0044351	1394.85	0.713855	7.86683e-11	macropinocytosis	1	DDB_G0272504
DDB_G0272520	GO:0044351	1394.85	0.713855	7.86683e-11	macropinocytosis	0	act15
DDB_G0272524	GO:0044351	1394.85	0.713855	7.86683e-11	macropinocytosis	1	malA
DDB_G0272550	GO:0044351	1394.85	0.713855	7.86683e-11	macropinocytosis	1	DDB_G0272550
DDB_G0272560	GO:0044351	1394.85	0.713855	7.86683e-11	macropinocytosis	0	capA-1
DDB_G0272564	GO:0044351	1394.85	0.713855	7.86683e-11	macropinocytosis	0	psmD8-1
DDB_G0272566	GO:0044351	1394.85	0.713855	7.86683e-11	macropinocytosis	1	psmD14
DDB_G0272578	GO:0044351	1394.85	0.713855	7.86683e-11	macropinocytosis	0	ap3b-1
DDB_G0272590	GO:0044351	1394.85	0.713855	7.86683e-11	macropinocytosis	0	srp14-1
DDB_G0272592	GO:0044351	1394.85	0.713855	7.86683e-11	macropinocytosis	0	DDB_G0272592
DDB_G0272604	GO:0044351	1394.85	0.713855	7.86683e-11	macropinocytosis	0	cyp508A2-1
DDB_G0272612	GO:0044351	1394.85	0.713855	7.86683e-11	macropinocytosis	0	NA
DDB_G0272618	GO:0044351	1394.85	0.713855	7.86683e-11	macropinocytosis	0	tkt-1
DDB_G0272620	GO:0044351	1394.85	0.713855	7.86683e-11	macropinocytosis	0	hsbp1-1
DDB_G0272624	GO:0044351	1394.85	0.713855	7.86683e-11	macropinocytosis	0	adrm1-1
DDB_G0272628	GO:0044351	1394.85	0.713855	7.86683e-11	macropinocytosis	0	DDB_G0272628
DDB_G0272632	GO:0044351	1394.85	0.713855	7.86683e-11	macropinocytosis	0	DDB_G0272632
DDB_G0272634	GO:0044351	1394.85	0.713855	7.86683e-11	macropinocytosis	0	dohh-1
DDB_G0272636	GO:0044351	1394.85	0.713855	7.86683e-11	macropinocytosis	0	DDB_G0272636
DDB_G0272660	GO:0044351	1394.85	0.713855	7.86683e-11	macropinocytosis	0	serS
DDB_G0272684	GO:0044351	1394.85	0.713855	7.86683e-11	macropinocytosis	1	qdpr
DDB_G0272686	GO:0044351	1394.85	0.713855	7.86683e-11	macropinocytosis	1	DDB_G0272686
DDB_G0272726	GO:0044351	1394.85	0.713855	7.86683e-11	macropinocytosis	0	NA
DDB_G0272730	GO:0044351	1394.85	0.713855	7.86683e-11	macropinocytosis	0	alg2
DDB_G0272740	GO:0044351	1394.85	0.713855	7.86683e-11	macropinocytosis	1	DDB_G0272740
DDB_G0272754	GO:0044351	1394.85	0.713855	7.86683e-11	macropinocytosis	1	gsr
DDB_G0272769	GO:0044351	1394.85	0.713855	7.86683e-11	macropinocytosis	1	DDB_G0272769
DDB_G0272783	GO:0044351	1394.85	0.713855	7.86683e-11	macropinocytosis	1	rliA
DDB_G0272785	GO:0044351	1394.85	0.713855	7.86683e-11	macropinocytosis	1	DDB_G0272785
DDB_G0272795	GO:0044351	1394.85	0.713855	7.86683e-11	macropinocytosis	0	NA
DDB_G0272801	GO:0044351	1394.85	0.713855	7.86683e-11	macropinocytosis	0	NA
DDB_G0272813	GO:0044351	1394.85	0.713855	7.86683e-11	macropinocytosis	0	cdk1
DDB_G0272815	GO:0044351	1394.85	0.713855	7.86683e-11	macropinocytosis	1	cprE
DDB_G0272825	GO:0044351	1394.85	0.713855	7.86683e-11	macropinocytosis	1	rps4
DDB_G0272831	GO:0044351	1394.85	0.713855	7.86683e-11	macropinocytosis	0	psmA7
DDB_G0272857	GO:0044351	1394.85	0.713855	7.86683e-11	macropinocytosis	0	rapB
DDB_G0272861	GO:0044351	1394.85	0.713855	7.86683e-11	macropinocytosis	1	cosA
DDB_G0272869	GO:0044351	1394.85	0.713855	7.86683e-11	macropinocytosis	0	sun1
DDB_G0272875	GO:0044351	1394.85	0.713855	7.86683e-11	macropinocytosis	0	cpnB-1
DDB_G0272877	GO:0044351	1394.85	0.713855	7.86683e-11	macropinocytosis	0	NA
DDB_G0272883	GO:0044351	1394.85	0.713855	7.86683e-11	macropinocytosis	0	ksrA-1
DDB_G0272889	GO:0044351	1394.85	0.713855	7.86683e-11	macropinocytosis	0	surf1-1
DDB_G0272893	GO:0044351	1394.85	0.713855	7.86683e-11	macropinocytosis	0	rpl15-1
DDB_G0272901	GO:0044351	1394.85	0.713855	7.86683e-11	macropinocytosis	0	DDB_G0272901
DDB_G0272931	GO:0044351	1394.85	0.713855	7.86683e-11	macropinocytosis	0	timm9
DDB_G0272933	GO:0044351	1394.85	0.713855	7.86683e-11	macropinocytosis	0	DDB_G0272933
DDB_G0272965	GO:0044351	1394.85	0.713855	7.86683e-11	macropinocytosis	1	DDB_G0272965
DDB_G0272969	GO:0044351	1394.85	0.713855	7.86683e-11	macropinocytosis	1	psmB1
DDB_G0272989	GO:0044351	1394.85	0.713855	7.86683e-11	macropinocytosis	1	vps5
DDB_G0273003	GO:0044351	1394.85	0.713855	7.86683e-11	macropinocytosis	0	snrpD3
DDB_G0273045	GO:0044351	1394.85	0.713855	7.86683e-11	macropinocytosis	0	cyp508A1-1
DDB_G0273047	GO:0044351	1394.85	0.713855	7.86683e-11	macropinocytosis	0	cyp508A3-1
DDB_G0273059	GO:0044351	1394.85	0.713855	7.86683e-11	macropinocytosis	0	cak1-1
DDB_G0273063	GO:0044351	1394.85	0.713855	7.86683e-11	macropinocytosis	0	dscA-1
DDB_G0273067	GO:0044351	1394.85	0.713855	7.86683e-11	macropinocytosis	0	dscD-1
DDB_G0273069	GO:0044351	1394.85	0.713855	7.86683e-11	macropinocytosis	0	ndkC-1
DDB_G0273071	GO:0044351	1394.85	0.713855	7.86683e-11	macropinocytosis	0	vatD-1
DDB_G0273073	GO:0044351	1394.85	0.713855	7.86683e-11	macropinocytosis	0	abcG17-1
DDB_G0273085	GO:0044351	1394.85	0.713855	7.86683e-11	macropinocytosis	0	DDB_G0273085
DDB_G0273089	GO:0044351	1394.85	0.713855	7.86683e-11	macropinocytosis	0	coq10-1
DDB_G0273093	GO:0044351	1394.85	0.713855	7.86683e-11	macropinocytosis	0	DDB_G0273093
DDB_G0273101	GO:0044351	1394.85	0.713855	7.86683e-11	macropinocytosis	0	DDB_G0273101
DDB_G0273105	GO:0044351	1394.85	0.713855	7.86683e-11	macropinocytosis	0	scdB-1
DDB_G0273107	GO:0044351	1394.85	0.713855	7.86683e-11	macropinocytosis	0	fip-1
DDB_G0273131	GO:0044351	1394.85	0.713855	7.86683e-11	macropinocytosis	0	g6pd-1
DDB_G0273147	GO:0044351	1394.85	0.713855	7.86683e-11	macropinocytosis	0	DDB_G0273147
DDB_G0273163	GO:0044351	1394.85	0.713855	7.86683e-11	macropinocytosis	0	psmB4-1
DDB_G0273189	GO:0044351	1394.85	0.713855	7.86683e-11	macropinocytosis	0	DDB_G0273189
DDB_G0273193	GO:0044351	1394.85	0.713855	7.86683e-11	macropinocytosis	0	DDB_G0273193
DDB_G0273203	GO:0044351	1394.85	0.713855	7.86683e-11	macropinocytosis	0	snf12-1
DDB_G0273205	GO:0044351	1394.85	0.713855	7.86683e-11	macropinocytosis	0	DDB_G0273205
DDB_G0273209	GO:0044351	1394.85	0.713855	7.86683e-11	macropinocytosis	0	trappc10-1
DDB_G0273247	GO:0044351	1394.85	0.713855	7.86683e-11	macropinocytosis	0	DDB_G0273247
DDB_G0273249	GO:0044351	1394.85	0.713855	7.86683e-11	macropinocytosis	0	hspE-1
DDB_G0273251	GO:0044351	1394.85	0.713855	7.86683e-11	macropinocytosis	0	fpaB-1
DDB_G0273285	GO:0044351	1394.85	0.713855	7.86683e-11	macropinocytosis	0	DDB_G0273285
DDB_G0273295	GO:0044351	1394.85	0.713855	7.86683e-11	macropinocytosis	0	DDB_G0273295
DDB_G0273319	GO:0044351	1394.85	0.713855	7.86683e-11	macropinocytosis	0	DDB_G0273319
DDB_G0273321	GO:0044351	1394.85	0.713855	7.86683e-11	macropinocytosis	0	NA
DDB_G0273411	GO:0044351	1394.85	0.713855	7.86683e-11	macropinocytosis	0	DDB_G0273411
DDB_G0273419	GO:0044351	1394.85	0.713855	7.86683e-11	macropinocytosis	0	DDB_G0273419
DDB_G0273421	GO:0044351	1394.85	0.713855	7.86683e-11	macropinocytosis	0	NA
DDB_G0273439	GO:0044351	1394.85	0.713855	7.86683e-11	macropinocytosis	0	ap2a1-1
DDB_G0273445	GO:0044351	1394.85	0.713855	7.86683e-11	macropinocytosis	0	spkA-1
DDB_G0273447	GO:0044351	1394.85	0.713855	7.86683e-11	macropinocytosis	0	abpE-1
DDB_G0273459	GO:0044351	1394.85	0.713855	7.86683e-11	macropinocytosis	0	DDB_G0273459
DDB_G0273467	GO:0044351	1394.85	0.713855	7.86683e-11	macropinocytosis	0	trappc1-1
DDB_G0273471	GO:0044351	1394.85	0.713855	7.86683e-11	macropinocytosis	0	dpp3-1
DDB_G0273473	GO:0044351	1394.85	0.713855	7.86683e-11	macropinocytosis	0	DDB_G0273473
DDB_G0273483	GO:0044351	1394.85	0.713855	7.86683e-11	macropinocytosis	0	DDB_G0273483
DDB_G0273501	GO:0044351	1394.85	0.713855	7.86683e-11	macropinocytosis	0	ap2a1-2
DDB_G0273515	GO:0044351	1394.85	0.713855	7.86683e-11	macropinocytosis	0	DDB_G0273515
DDB_G0273517	GO:0044351	1394.85	0.713855	7.86683e-11	macropinocytosis	0	abpE-2
DDB_G0273529	GO:0044351	1394.85	0.713855	7.86683e-11	macropinocytosis	0	NA
DDB_G0273531	GO:0044351	1394.85	0.713855	7.86683e-11	macropinocytosis	0	spkA-2
DDB_G0273537	GO:0044351	1394.85	0.713855	7.86683e-11	macropinocytosis	0	DDB_G0273537
DDB_G0273539	GO:0044351	1394.85	0.713855	7.86683e-11	macropinocytosis	0	DDB_G0273539
DDB_G0273555	GO:0044351	1394.85	0.713855	7.86683e-11	macropinocytosis	0	DDB_G0273555
DDB_G0273559	GO:0044351	1394.85	0.713855	7.86683e-11	macropinocytosis	0	DDB_G0273559
DDB_G0273563	GO:0044351	1394.85	0.713855	7.86683e-11	macropinocytosis	0	dpp3-2
DDB_G0273579	GO:0044351	1394.85	0.713855	7.86683e-11	macropinocytosis	0	trappc1-2
DDB_G0273597	GO:0044351	1394.85	0.713855	7.86683e-11	macropinocytosis	0	DDB_G0273597
DDB_G0273603	GO:0044351	1394.85	0.713855	7.86683e-11	macropinocytosis	0	DDB_G0273603
DDB_G0273615	GO:0044351	1394.85	0.713855	7.86683e-11	macropinocytosis	0	fpaB-2
DDB_G0273623	GO:0044351	1394.85	0.713855	7.86683e-11	macropinocytosis	0	hspE-2
DDB_G0273639	GO:0044351	1394.85	0.713855	7.86683e-11	macropinocytosis	0	g6pd-2
DDB_G0273651	GO:0044351	1394.85	0.713855	7.86683e-11	macropinocytosis	0	DDB_G0273651
DDB_G0273657	GO:0044351	1394.85	0.713855	7.86683e-11	macropinocytosis	0	vatD-2
DDB_G0273719	GO:0044351	1394.85	0.713855	7.86683e-11	macropinocytosis	0	trappc10-2
DDB_G0273723	GO:0044351	1394.85	0.713855	7.86683e-11	macropinocytosis	0	DDB_G0273723
DDB_G0273725	GO:0044351	1394.85	0.713855	7.86683e-11	macropinocytosis	0	snf12-2
DDB_G0273737	GO:0044351	1394.85	0.713855	7.86683e-11	macropinocytosis	0	cak1-2
DDB_G0273739	GO:0044351	1394.85	0.713855	7.86683e-11	macropinocytosis	0	DDB_G0273739
DDB_G0273745	GO:0044351	1394.85	0.713855	7.86683e-11	macropinocytosis	0	DDB_G0273745
DDB_G0273771	GO:0044351	1394.85	0.713855	7.86683e-11	macropinocytosis	0	DDB_G0273771
DDB_G0273781	GO:0044351	1394.85	0.713855	7.86683e-11	macropinocytosis	0	abcG17-2
DDB_G0273791	GO:0044351	1394.85	0.713855	7.86683e-11	macropinocytosis	0	DDB_G0273791
DDB_G0273795	GO:0044351	1394.85	0.713855	7.86683e-11	macropinocytosis	0	DDB_G0273795
DDB_G0273803	GO:0044351	1394.85	0.713855	7.86683e-11	macropinocytosis	0	coq10-2
DDB_G0273805	GO:0044351	1394.85	0.713855	7.86683e-11	macropinocytosis	0	ndkC-2
DDB_G0273813	GO:0044351	1394.85	0.713855	7.86683e-11	macropinocytosis	0	DDB_G0273813
DDB_G0273831	GO:0044351	1394.85	0.713855	7.86683e-11	macropinocytosis	0	DDB_G0273831
DDB_G0273837	GO:0044351	1394.85	0.713855	7.86683e-11	macropinocytosis	0	scdB-2
DDB_G0273839	GO:0044351	1394.85	0.713855	7.86683e-11	macropinocytosis	0	fip-2
DDB_G0273887	GO:0044351	1394.85	0.713855	7.86683e-11	macropinocytosis	0	dscD-2
DDB_G0273909	GO:0044351	1394.85	0.713855	7.86683e-11	macropinocytosis	0	psmB4-2
DDB_G0273917	GO:0044351	1394.85	0.713855	7.86683e-11	macropinocytosis	0	NA
DDB_G0273919	GO:0044351	1394.85	0.713855	7.86683e-11	macropinocytosis	0	dscA-2
DDB_G0273941	GO:0044351	1394.85	0.713855	7.86683e-11	macropinocytosis	0	cyp508A3-2
DDB_G0273943	GO:0044351	1394.85	0.713855	7.86683e-11	macropinocytosis	0	cyp508A1-2
DDB_G0273945	GO:0044351	1394.85	0.713855	7.86683e-11	macropinocytosis	0	cyp508A2-2
DDB_G0273955	GO:0044351	1394.85	0.713855	7.86683e-11	macropinocytosis	0	DDB_G0273955
DDB_G0273975	GO:0044351	1394.85	0.713855	7.86683e-11	macropinocytosis	0	DDB_G0273975
DDB_G0273977	GO:0044351	1394.85	0.713855	7.86683e-11	macropinocytosis	0	srp14-2
DDB_G0273979	GO:0044351	1394.85	0.713855	7.86683e-11	macropinocytosis	0	psmD8-2
DDB_G0273983	GO:0044351	1394.85	0.713855	7.86683e-11	macropinocytosis	0	rpl15-2
DDB_G0273985	GO:0044351	1394.85	0.713855	7.86683e-11	macropinocytosis	0	NA
DDB_G0274001	GO:0044351	1394.85	0.713855	7.86683e-11	macropinocytosis	0	surf1-2
DDB_G0274003	GO:0044351	1394.85	0.713855	7.86683e-11	macropinocytosis	0	ap3b-2
DDB_G0274013	GO:0044351	1394.85	0.713855	7.86683e-11	macropinocytosis	0	hsbp1-2
DDB_G0274015	GO:0044351	1394.85	0.713855	7.86683e-11	macropinocytosis	0	ksrA-2
DDB_G0274019	GO:0044351	1394.85	0.713855	7.86683e-11	macropinocytosis	0	tkt-2
DDB_G0274023	GO:0044351	1394.85	0.713855	7.86683e-11	macropinocytosis	0	capA-2
DDB_G0274027	GO:0044351	1394.85	0.713855	7.86683e-11	macropinocytosis	0	NA
DDB_G0274045	GO:0044351	1394.85	0.713855	7.86683e-11	macropinocytosis	0	NA
DDB_G0274049	GO:0044351	1394.85	0.713855	7.86683e-11	macropinocytosis	0	NA
DDB_G0274051	GO:0044351	1394.85	0.713855	7.86683e-11	macropinocytosis	0	cpnB-2
DDB_G0274069	GO:0044351	1394.85	0.713855	7.86683e-11	macropinocytosis	0	DDB_G0274069
DDB_G0274079	GO:0044351	1394.85	0.713855	7.86683e-11	macropinocytosis	0	dohh-2
DDB_G0274081	GO:0044351	1394.85	0.713855	7.86683e-11	macropinocytosis	0	DDB_G0274081
DDB_G0274085	GO:0044351	1394.85	0.713855	7.86683e-11	macropinocytosis	0	DDB_G0274085
DDB_G0274093	GO:0044351	1394.85	0.713855	7.86683e-11	macropinocytosis	0	adrm1-2
DDB_G0274103	GO:0044351	1394.85	0.713855	7.86683e-11	macropinocytosis	1	ggtA
DDB_G0274105	GO:0044351	1394.85	0.713855	7.86683e-11	macropinocytosis	1	glgB
DDB_G0274107	GO:0044351	1394.85	0.713855	7.86683e-11	macropinocytosis	1	sfbA
DDB_G0274109	GO:0044351	1394.85	0.713855	7.86683e-11	macropinocytosis	0	paxB
DDB_G0274111	GO:0044351	1394.85	0.713855	7.86683e-11	macropinocytosis	0	pfkA
DDB_G0274113	GO:0044351	1394.85	0.713855	7.86683e-11	macropinocytosis	0	rpl8
DDB_G0274123	GO:0044351	1394.85	0.713855	7.86683e-11	macropinocytosis	0	pyd3
DDB_G0274125	GO:0044351	1394.85	0.713855	7.86683e-11	macropinocytosis	0	gpgA
DDB_G0274129	GO:0044351	1394.85	0.713855	7.86683e-11	macropinocytosis	0	act12
DDB_G0274133	GO:0044351	1394.85	0.713855	7.86683e-11	macropinocytosis	0	act2
DDB_G0274135	GO:0044351	1394.85	0.713855	7.86683e-11	macropinocytosis	1	act6
DDB_G0274137	GO:0044351	1394.85	0.713855	7.86683e-11	macropinocytosis	0	act14
DDB_G0274167	GO:0044351	1394.85	0.713855	7.86683e-11	macropinocytosis	1	cand1
DDB_G0274181	GO:0044351	1394.85	0.713855	7.86683e-11	macropinocytosis	1	DDB_G0274181
DDB_G0274187	GO:0044351	1394.85	0.713855	7.86683e-11	macropinocytosis	1	DDB_G0274187
DDB_G0274195	GO:0044351	1394.85	0.713855	7.86683e-11	macropinocytosis	1	DDB_G0274195
DDB_G0274215	GO:0044351	1394.85	0.713855	7.86683e-11	macropinocytosis	1	NA
DDB_G0274223	GO:0044351	1394.85	0.713855	7.86683e-11	macropinocytosis	0	DDB_G0274223
DDB_G0274229	GO:0044351	1394.85	0.713855	7.86683e-11	macropinocytosis	1	prpf8
DDB_G0274233	GO:0044351	1394.85	0.713855	7.86683e-11	macropinocytosis	0	ctbsA
DDB_G0274237	GO:0044351	1394.85	0.713855	7.86683e-11	macropinocytosis	0	DDB_G0274237
DDB_G0274239	GO:0044351	1394.85	0.713855	7.86683e-11	macropinocytosis	1	eIF1
DDB_G0274247	GO:0044351	1394.85	0.713855	7.86683e-11	macropinocytosis	1	fam91
DDB_G0274273	GO:0044351	1394.85	0.713855	7.86683e-11	macropinocytosis	0	NA
DDB_G0274279	GO:0044351	1394.85	0.713855	7.86683e-11	macropinocytosis	1	tssc1
DDB_G0274285	GO:0044351	1394.85	0.713855	7.86683e-11	macropinocytosis	0	act20
DDB_G0274311	GO:0044351	1394.85	0.713855	7.86683e-11	macropinocytosis	1	DDB_G0274311
DDB_G0274331	GO:0044351	1394.85	0.713855	7.86683e-11	macropinocytosis	0	DDB_G0274331
DDB_G0274339	GO:0044351	1394.85	0.713855	7.86683e-11	macropinocytosis	0	DDB_G0274339
DDB_G0274345	GO:0044351	1394.85	0.713855	7.86683e-11	macropinocytosis	1	DDB_G0274345
DDB_G0274375	GO:0044351	1394.85	0.713855	7.86683e-11	macropinocytosis	1	fba
DDB_G0274381	GO:0044351	1394.85	0.713855	7.86683e-11	macropinocytosis	0	vatP
DDB_G0274407	GO:0044351	1394.85	0.713855	7.86683e-11	macropinocytosis	1	DDB_G0274407
DDB_G0274437	GO:0044351	1394.85	0.713855	7.86683e-11	macropinocytosis	1	twfA
DDB_G0274441	GO:0044351	1394.85	0.713855	7.86683e-11	macropinocytosis	1	psiL
DDB_G0274449	GO:0044351	1394.85	0.713855	7.86683e-11	macropinocytosis	1	scsB
DDB_G0274465	GO:0044351	1394.85	0.713855	7.86683e-11	macropinocytosis	1	DDB_G0274465
DDB_G0274471	GO:0044351	1394.85	0.713855	7.86683e-11	macropinocytosis	1	tpiA
DDB_G0274511	GO:0044351	1394.85	0.713855	7.86683e-11	macropinocytosis	1	DDB_G0274511
DDB_G0274519	GO:0044351	1394.85	0.713855	7.86683e-11	macropinocytosis	1	napA
DDB_G0274549	GO:0044351	1394.85	0.713855	7.86683e-11	macropinocytosis	1	DDB_G0274549
DDB_G0274553	GO:0044351	1394.85	0.713855	7.86683e-11	macropinocytosis	1	vatH
DDB_G0274559	GO:0044351	1394.85	0.713855	7.86683e-11	macropinocytosis	1	udkB
DDB_G0274561	GO:0044351	1394.85	0.713855	7.86683e-11	macropinocytosis	0	act21
DDB_G0274565	GO:0044351	1394.85	0.713855	7.86683e-11	macropinocytosis	0	erh
DDB_G0274579	GO:0044351	1394.85	0.713855	7.86683e-11	macropinocytosis	1	pitB
DDB_G0274587	GO:0044351	1394.85	0.713855	7.86683e-11	macropinocytosis	1	nup62
DDB_G0274595	GO:0044351	1394.85	0.713855	7.86683e-11	macropinocytosis	1	catA
DDB_G0274597	GO:0044351	1394.85	0.713855	7.86683e-11	macropinocytosis	1	ctnA
DDB_G0274599	GO:0044351	1394.85	0.713855	7.86683e-11	macropinocytosis	0	act13
DDB_G0274601	GO:0044351	1394.85	0.713855	7.86683e-11	macropinocytosis	0	act9
DDB_G0274603	GO:0044351	1394.85	0.713855	7.86683e-11	macropinocytosis	0	kif9
DDB_G0274605	GO:0044351	1394.85	0.713855	7.86683e-11	macropinocytosis	1	gefR
DDB_G0274627	GO:0044351	1394.85	0.713855	7.86683e-11	macropinocytosis	1	eif3D
DDB_G0274657	GO:0044351	1394.85	0.713855	7.86683e-11	macropinocytosis	0	DDB_G0274657
DDB_G0274663	GO:0044351	1394.85	0.713855	7.86683e-11	macropinocytosis	1	DDB_G0274663
DDB_G0274669	GO:0044351	1394.85	0.713855	7.86683e-11	macropinocytosis	0	DDB_G0274669
DDB_G0274705	GO:0044351	1394.85	0.713855	7.86683e-11	macropinocytosis	0	DDB_G0274705
DDB_G0274709	GO:0044351	1394.85	0.713855	7.86683e-11	macropinocytosis	0	DDB_G0274709
DDB_G0274725	GO:0044351	1394.85	0.713855	7.86683e-11	macropinocytosis	0	NA
DDB_G0274727	GO:0044351	1394.85	0.713855	7.86683e-11	macropinocytosis	0	act19
DDB_G0274741	GO:0044351	1394.85	0.713855	7.86683e-11	macropinocytosis	1	gnt15
DDB_G0274757	GO:0044351	1394.85	0.713855	7.86683e-11	macropinocytosis	1	DDB_G0274757
DDB_G0274775	GO:0044351	1394.85	0.713855	7.86683e-11	macropinocytosis	1	phdI
DDB_G0274781	GO:0044351	1394.85	0.713855	7.86683e-11	macropinocytosis	1	DDB_G0274781
DDB_G0274791	GO:0044351	1394.85	0.713855	7.86683e-11	macropinocytosis	0	NA
DDB_G0274797	GO:0044351	1394.85	0.713855	7.86683e-11	macropinocytosis	1	aqr
DDB_G0274803	GO:0044351	1394.85	0.713855	7.86683e-11	macropinocytosis	1	trappc9
DDB_G0274815	GO:0044351	1394.85	0.713855	7.86683e-11	macropinocytosis	0	dlcB
DDB_G0274833	GO:0044351	1394.85	0.713855	7.86683e-11	macropinocytosis	0	mapksp1
DDB_G0274859	GO:0044351	1394.85	0.713855	7.86683e-11	macropinocytosis	1	prdx4
DDB_G0274893	GO:0044351	1394.85	0.713855	7.86683e-11	macropinocytosis	1	DDB_G0274893
DDB_G0274897	GO:0044351	1394.85	0.713855	7.86683e-11	macropinocytosis	1	DDB_G0274897
DDB_G0274917	GO:0044351	1394.85	0.713855	7.86683e-11	macropinocytosis	1	vps13B
DDB_G0274959	GO:0044351	1394.85	0.713855	7.86683e-11	macropinocytosis	0	mrpl13
DDB_G0274969	GO:0044351	1394.85	0.713855	7.86683e-11	macropinocytosis	0	DDB_G0274969
DDB_G0274975	GO:0044351	1394.85	0.713855	7.86683e-11	macropinocytosis	1	DDB_G0274975
DDB_G0275025	GO:0044351	1394.85	0.713855	7.86683e-11	macropinocytosis	1	DDB_G0275025
DDB_G0275027	GO:0044351	1394.85	0.713855	7.86683e-11	macropinocytosis	1	DDB_G0275027
DDB_G0275029	GO:0044351	1394.85	0.713855	7.86683e-11	macropinocytosis	1	odhB
DDB_G0275039	GO:0044351	1394.85	0.713855	7.86683e-11	macropinocytosis	1	DDB_G0275039
DDB_G0275045	GO:0044351	1394.85	0.713855	7.86683e-11	macropinocytosis	1	gpbB
DDB_G0275049	GO:0044351	1394.85	0.713855	7.86683e-11	macropinocytosis	0	DDB_G0275049
DDB_G0275055	GO:0044351	1394.85	0.713855	7.86683e-11	macropinocytosis	0	NA
DDB_G0275057	GO:0044351	1394.85	0.713855	7.86683e-11	macropinocytosis	1	DDB_G0275057
DDB_G0275059	GO:0044351	1394.85	0.713855	7.86683e-11	macropinocytosis	0	NA
DDB_G0275065	GO:0044351	1394.85	0.713855	7.86683e-11	macropinocytosis	1	dmpA
DDB_G0275069	GO:0044351	1394.85	0.713855	7.86683e-11	macropinocytosis	1	pks16
DDB_G0275071	GO:0044351	1394.85	0.713855	7.86683e-11	macropinocytosis	1	fahd1
DDB_G0275075	GO:0044351	1394.85	0.713855	7.86683e-11	macropinocytosis	1	DDB_G0275075
DDB_G0275107	GO:0044351	1394.85	0.713855	7.86683e-11	macropinocytosis	1	NA
DDB_G0275115	GO:0044351	1394.85	0.713855	7.86683e-11	macropinocytosis	0	sdhC
DDB_G0275121	GO:0044351	1394.85	0.713855	7.86683e-11	macropinocytosis	1	alyC
DDB_G0275125	GO:0044351	1394.85	0.713855	7.86683e-11	macropinocytosis	1	plbF
DDB_G0275127	GO:0044351	1394.85	0.713855	7.86683e-11	macropinocytosis	1	NA
DDB_G0275141	GO:0044351	1394.85	0.713855	7.86683e-11	macropinocytosis	1	utp5
DDB_G0275153	GO:0044351	1394.85	0.713855	7.86683e-11	macropinocytosis	0	gpdA
DDB_G0275167	GO:0044351	1394.85	0.713855	7.86683e-11	macropinocytosis	1	dstD
DDB_G0275179	GO:0044351	1394.85	0.713855	7.86683e-11	macropinocytosis	1	DDB_G0275179
DDB_G0275181	GO:0044351	1394.85	0.713855	7.86683e-11	macropinocytosis	1	mcee
DDB_G0275227	GO:0044351	1394.85	0.713855	7.86683e-11	macropinocytosis	1	DDB_G0275227
DDB_G0275249	GO:0044351	1394.85	0.713855	7.86683e-11	macropinocytosis	0	NA
DDB_G0275263	GO:0044351	1394.85	0.713855	7.86683e-11	macropinocytosis	0	asnS1
DDB_G0275299	GO:0044351	1394.85	0.713855	7.86683e-11	macropinocytosis	1	cln5
DDB_G0275301	GO:0044351	1394.85	0.713855	7.86683e-11	macropinocytosis	1	NA
DDB_G0275311	GO:0044351	1394.85	0.713855	7.86683e-11	macropinocytosis	1	DDB_G0275311
DDB_G0275329	GO:0044351	1394.85	0.713855	7.86683e-11	macropinocytosis	0	DDB_G0275329
DDB_G0275335	GO:0044351	1394.85	0.713855	7.86683e-11	macropinocytosis	0	DDB_G0275335
DDB_G0275355	GO:0044351	1394.85	0.713855	7.86683e-11	macropinocytosis	1	pccA
DDB_G0275359	GO:0044351	1394.85	0.713855	7.86683e-11	macropinocytosis	1	DDB_G0275359
DDB_G0275381	GO:0044351	1394.85	0.713855	7.86683e-11	macropinocytosis	0	DDB_G0275381
DDB_G0275383	GO:0044351	1394.85	0.713855	7.86683e-11	macropinocytosis	1	DDB_G0275383
DDB_G0275389	GO:0044351	1394.85	0.713855	7.86683e-11	macropinocytosis	0	tom70
DDB_G0275429	GO:0044351	1394.85	0.713855	7.86683e-11	macropinocytosis	1	syn8A
DDB_G0275459	GO:0044351	1394.85	0.713855	7.86683e-11	macropinocytosis	1	DDB_G0275459
DDB_G0275471	GO:0044351	1394.85	0.713855	7.86683e-11	macropinocytosis	1	csn8
DDB_G0275473	GO:0044351	1394.85	0.713855	7.86683e-11	macropinocytosis	1	rps24
DDB_G0275495	GO:0044351	1394.85	0.713855	7.86683e-11	macropinocytosis	1	cepE
DDB_G0275499	GO:0044351	1394.85	0.713855	7.86683e-11	macropinocytosis	1	omt5
DDB_G0275501	GO:0044351	1394.85	0.713855	7.86683e-11	macropinocytosis	1	omt6
DDB_G0275505	GO:0044351	1394.85	0.713855	7.86683e-11	macropinocytosis	1	NA
DDB_G0275513	GO:0044351	1394.85	0.713855	7.86683e-11	macropinocytosis	1	DDB_G0275513
DDB_G0275519	GO:0044351	1394.85	0.713855	7.86683e-11	macropinocytosis	1	DDB_G0275519
DDB_G0275525	GO:0044351	1394.85	0.713855	7.86683e-11	macropinocytosis	0	hspK
DDB_G0275537	GO:0044351	1394.85	0.713855	7.86683e-11	macropinocytosis	1	cytC
DDB_G0275545	GO:0044351	1394.85	0.713855	7.86683e-11	macropinocytosis	0	NA
DDB_G0275555	GO:0044351	1394.85	0.713855	7.86683e-11	macropinocytosis	0	DDB_G0275555
DDB_G0275559	GO:0044351	1394.85	0.713855	7.86683e-11	macropinocytosis	1	DDB_G0275559
DDB_G0275573	GO:0044351	1394.85	0.713855	7.86683e-11	macropinocytosis	0	vps32
DDB_G0275577	GO:0044351	1394.85	0.713855	7.86683e-11	macropinocytosis	1	DDB_G0275577
DDB_G0275617	GO:0044351	1394.85	0.713855	7.86683e-11	macropinocytosis	0	tbpA
DDB_G0275619	GO:0044351	1394.85	0.713855	7.86683e-11	macropinocytosis	0	pppB
DDB_G0275673	GO:0044351	1394.85	0.713855	7.86683e-11	macropinocytosis	1	DDB_G0275673
DDB_G0275675	GO:0044351	1394.85	0.713855	7.86683e-11	macropinocytosis	1	rab32C
DDB_G0275693	GO:0044351	1394.85	0.713855	7.86683e-11	macropinocytosis	1	tpp1C
DDB_G0275695	GO:0044351	1394.85	0.713855	7.86683e-11	macropinocytosis	1	ampA
DDB_G0275701	GO:0044351	1394.85	0.713855	7.86683e-11	macropinocytosis	0	vatE
DDB_G0275707	GO:0044351	1394.85	0.713855	7.86683e-11	macropinocytosis	1	DDB_G0275707
DDB_G0275711	GO:0044351	1394.85	0.713855	7.86683e-11	macropinocytosis	1	nhe1
DDB_G0275713	GO:0044351	1394.85	0.713855	7.86683e-11	macropinocytosis	1	DDB_G0275713
DDB_G0275739	GO:0044351	1394.85	0.713855	7.86683e-11	macropinocytosis	1	DDB_G0275739
DDB_G0275749	GO:0044351	1394.85	0.713855	7.86683e-11	macropinocytosis	1	DDB_G0275749
DDB_G0275755	GO:0044351	1394.85	0.713855	7.86683e-11	macropinocytosis	0	DDB_G0275755
DDB_G0275759	GO:0044351	1394.85	0.713855	7.86683e-11	macropinocytosis	1	rpa1
DDB_G0275801	GO:0044351	1394.85	0.713855	7.86683e-11	macropinocytosis	1	DDB_G0275801
DDB_G0275805	GO:0044351	1394.85	0.713855	7.86683e-11	macropinocytosis	1	DDB_G0275805
DDB_G0275809	GO:0044351	1394.85	0.713855	7.86683e-11	macropinocytosis	1	msh2
DDB_G0275829	GO:0044351	1394.85	0.713855	7.86683e-11	macropinocytosis	1	DDB_G0275829
DDB_G0275831	GO:0044351	1394.85	0.713855	7.86683e-11	macropinocytosis	1	NA
DDB_G0275863	GO:0044351	1394.85	0.713855	7.86683e-11	macropinocytosis	0	nmt
DDB_G0275865	GO:0044351	1394.85	0.713855	7.86683e-11	macropinocytosis	1	DDB_G0275865
DDB_G0275881	GO:0044351	1394.85	0.713855	7.86683e-11	macropinocytosis	1	rpl13a
DDB_G0275885	GO:0044351	1394.85	0.713855	7.86683e-11	macropinocytosis	1	DDB_G0275885
DDB_G0275887	GO:0044351	1394.85	0.713855	7.86683e-11	macropinocytosis	0	masA
DDB_G0275911	GO:0044351	1394.85	0.713855	7.86683e-11	macropinocytosis	1	NA
DDB_G0275913	GO:0044351	1394.85	0.713855	7.86683e-11	macropinocytosis	0	DDB_G0275913
DDB_G0275921	GO:0044351	1394.85	0.713855	7.86683e-11	macropinocytosis	0	DDB_G0275921
DDB_G0275929	GO:0044351	1394.85	0.713855	7.86683e-11	macropinocytosis	1	pds5
DDB_G0275953	GO:0044351	1394.85	0.713855	7.86683e-11	macropinocytosis	1	DDB_G0275953
DDB_G0275959	GO:0044351	1394.85	0.713855	7.86683e-11	macropinocytosis	0	DDB_G0275959
DDB_G0275967	GO:0044351	1394.85	0.713855	7.86683e-11	macropinocytosis	1	DDB_G0275967
DDB_G0275973	GO:0044351	1394.85	0.713855	7.86683e-11	macropinocytosis	0	NA
DDB_G0275979	GO:0044351	1394.85	0.713855	7.86683e-11	macropinocytosis	1	thoc7
DDB_G0276031	GO:0044351	1394.85	0.713855	7.86683e-11	macropinocytosis	1	DDB_G0276031
DDB_G0276033	GO:0044351	1394.85	0.713855	7.86683e-11	macropinocytosis	0	cyb5A
DDB_G0276035	GO:0044351	1394.85	0.713855	7.86683e-11	macropinocytosis	1	DDB_G0276035
DDB_G0276065	GO:0044351	1394.85	0.713855	7.86683e-11	macropinocytosis	0	DDB_G0276065
DDB_G0276067	GO:0044351	1394.85	0.713855	7.86683e-11	macropinocytosis	1	ddcB
DDB_G0276077	GO:0044351	1394.85	0.713855	7.86683e-11	macropinocytosis	1	mlcR
DDB_G0276099	GO:0044351	1394.85	0.713855	7.86683e-11	macropinocytosis	1	DDB_G0276099
DDB_G0276101	GO:0044351	1394.85	0.713855	7.86683e-11	macropinocytosis	1	smc3
DDB_G0276105	GO:0044351	1394.85	0.713855	7.86683e-11	macropinocytosis	1	gtr2
DDB_G0276141	GO:0044351	1394.85	0.713855	7.86683e-11	macropinocytosis	1	pdi1
DDB_G0276153	GO:0044351	1394.85	0.713855	7.86683e-11	macropinocytosis	0	nsfA
DDB_G0276179	GO:0044351	1394.85	0.713855	7.86683e-11	macropinocytosis	0	DDB_G0276179
DDB_G0276189	GO:0044351	1394.85	0.713855	7.86683e-11	macropinocytosis	0	NA
DDB_G0276193	GO:0044351	1394.85	0.713855	7.86683e-11	macropinocytosis	1	DDB_G0276193
DDB_G0276205	GO:0044351	1394.85	0.713855	7.86683e-11	macropinocytosis	1	DDB_G0276205
DDB_G0276229	GO:0044351	1394.85	0.713855	7.86683e-11	macropinocytosis	1	clcC
DDB_G0276233	GO:0044351	1394.85	0.713855	7.86683e-11	macropinocytosis	0	cct8
DDB_G0276241	GO:0044351	1394.85	0.713855	7.86683e-11	macropinocytosis	0	atp5e
DDB_G0276243	GO:0044351	1394.85	0.713855	7.86683e-11	macropinocytosis	1	DDB_G0276243
DDB_G0276259	GO:0044351	1394.85	0.713855	7.86683e-11	macropinocytosis	1	DDB_G0276259
DDB_G0276267	GO:0044351	1394.85	0.713855	7.86683e-11	macropinocytosis	1	gpaB
DDB_G0276275	GO:0044351	1394.85	0.713855	7.86683e-11	macropinocytosis	1	NA
DDB_G0276291	GO:0044351	1394.85	0.713855	7.86683e-11	macropinocytosis	0	DDB_G0276291
DDB_G0276305	GO:0044351	1394.85	0.713855	7.86683e-11	macropinocytosis	1	DDB_G0276305
DDB_G0276317	GO:0044351	1394.85	0.713855	7.86683e-11	macropinocytosis	0	NA
DDB_G0276335	GO:0044351	1394.85	0.713855	7.86683e-11	macropinocytosis	1	pyr1-3
DDB_G0276341	GO:0044351	1394.85	0.713855	7.86683e-11	macropinocytosis	1	pccB
DDB_G0276345	GO:0044351	1394.85	0.713855	7.86683e-11	macropinocytosis	0	naa20
DDB_G0276355	GO:0044351	1394.85	0.713855	7.86683e-11	macropinocytosis	1	dhcA
DDB_G0276359	GO:0044351	1394.85	0.713855	7.86683e-11	macropinocytosis	0	sec11
DDB_G0276361	GO:0044351	1394.85	0.713855	7.86683e-11	macropinocytosis	1	DDB_G0276361
DDB_G0276411	GO:0044351	1394.85	0.713855	7.86683e-11	macropinocytosis	1	mrt4
DDB_G0276415	GO:0044351	1394.85	0.713855	7.86683e-11	macropinocytosis	0	rps18
DDB_G0276417	GO:0044351	1394.85	0.713855	7.86683e-11	macropinocytosis	0	pdhB
DDB_G0276425	GO:0044351	1394.85	0.713855	7.86683e-11	macropinocytosis	0	nutf2
DDB_G0276427	GO:0044351	1394.85	0.713855	7.86683e-11	macropinocytosis	0	osbF
DDB_G0276441	GO:0044351	1394.85	0.713855	7.86683e-11	macropinocytosis	1	rpl7
DDB_G0276445	GO:0044351	1394.85	0.713855	7.86683e-11	macropinocytosis	1	DDB_G0276445
DDB_G0276455	GO:0044351	1394.85	0.713855	7.86683e-11	macropinocytosis	1	gpaG
DDB_G0276457	GO:0044351	1394.85	0.713855	7.86683e-11	macropinocytosis	0	rps15a
DDB_G0276463	GO:0044351	1394.85	0.713855	7.86683e-11	macropinocytosis	1	DG1112
DDB_G0276471	GO:0044351	1394.85	0.713855	7.86683e-11	macropinocytosis	0	DDB_G0276471
DDB_G0276473	GO:0044351	1394.85	0.713855	7.86683e-11	macropinocytosis	0	DDB_G0276473
DDB_G0276475	GO:0044351	1394.85	0.713855	7.86683e-11	macropinocytosis	1	cfaC
DDB_G0276503	GO:0044351	1394.85	0.713855	7.86683e-11	macropinocytosis	0	DDB_G0276503
DDB_G0276515	GO:0044351	1394.85	0.713855	7.86683e-11	macropinocytosis	0	DDB_G0276515
DDB_G0276567	GO:0044351	1394.85	0.713855	7.86683e-11	macropinocytosis	0	DDB_G0276567
DDB_G0276573	GO:0044351	1394.85	0.713855	7.86683e-11	macropinocytosis	1	DDB_G0276573
DDB_G0276575	GO:0044351	1394.85	0.713855	7.86683e-11	macropinocytosis	0	syn16A
DDB_G0276615	GO:0044351	1394.85	0.713855	7.86683e-11	macropinocytosis	0	hmgB
DDB_G0276617	GO:0044351	1394.85	0.713855	7.86683e-11	macropinocytosis	1	myoC
DDB_G0276673	GO:0044351	1394.85	0.713855	7.86683e-11	macropinocytosis	1	NA
DDB_G0276721	GO:0044351	1394.85	0.713855	7.86683e-11	macropinocytosis	1	tyrS
DDB_G0276765	GO:0044351	1394.85	0.713855	7.86683e-11	macropinocytosis	0	ubqC
DDB_G0276767	GO:0044351	1394.85	0.713855	7.86683e-11	macropinocytosis	1	plbA
DDB_G0276769	GO:0044351	1394.85	0.713855	7.86683e-11	macropinocytosis	1	NA
DDB_G0276779	GO:0044351	1394.85	0.713855	7.86683e-11	macropinocytosis	1	DDB_G0276779
DDB_G0276781	GO:0044351	1394.85	0.713855	7.86683e-11	macropinocytosis	0	DDB_G0276781
DDB_G0276789	GO:0044351	1394.85	0.713855	7.86683e-11	macropinocytosis	1	NA
DDB_G0276791	GO:0044351	1394.85	0.713855	7.86683e-11	macropinocytosis	1	DDB_G0276791
DDB_G0276795	GO:0044351	1394.85	0.713855	7.86683e-11	macropinocytosis	1	ctbsB
DDB_G0276803	GO:0044351	1394.85	0.713855	7.86683e-11	macropinocytosis	0	prp19
DDB_G0276821	GO:0044351	1394.85	0.713855	7.86683e-11	macropinocytosis	1	DDB_G0276821
DDB_G0276837	GO:0044351	1394.85	0.713855	7.86683e-11	macropinocytosis	0	DDB_G0276837
DDB_G0276847	GO:0044351	1394.85	0.713855	7.86683e-11	macropinocytosis	1	DDB_G0276847
DDB_G0276861	GO:0044351	1394.85	0.713855	7.86683e-11	macropinocytosis	1	DDB_G0276861
DDB_G0276871	GO:0044351	1394.85	0.713855	7.86683e-11	macropinocytosis	0	rpl10a
DDB_G0276885	GO:0044351	1394.85	0.713855	7.86683e-11	macropinocytosis	1	casK
DDB_G0276893	GO:0044351	1394.85	0.713855	7.86683e-11	macropinocytosis	0	ctxB
DDB_G0276897	GO:0044351	1394.85	0.713855	7.86683e-11	macropinocytosis	1	DDB_G0276897
DDB_G0276899	GO:0044351	1394.85	0.713855	7.86683e-11	macropinocytosis	1	DDB_G0276899
DDB_G0276901	GO:0044351	1394.85	0.713855	7.86683e-11	macropinocytosis	0	NA
DDB_G0276905	GO:0044351	1394.85	0.713855	7.86683e-11	macropinocytosis	1	DDB_G0276905
DDB_G0276917	GO:0044351	1394.85	0.713855	7.86683e-11	macropinocytosis	1	psmC2
DDB_G0276925	GO:0044351	1394.85	0.713855	7.86683e-11	macropinocytosis	0	DDB_G0276925
DDB_G0276927	GO:0044351	1394.85	0.713855	7.86683e-11	macropinocytosis	0	DDB_G0276927
DDB_G0276933	GO:0044351	1394.85	0.713855	7.86683e-11	macropinocytosis	1	mcfX
DDB_G0276943	GO:0044351	1394.85	0.713855	7.86683e-11	macropinocytosis	0	crtp1
DDB_G0276947	GO:0044351	1394.85	0.713855	7.86683e-11	macropinocytosis	0	trap1
DDB_G0276973	GO:0044351	1394.85	0.713855	7.86683e-11	macropinocytosis	1	nramp1
DDB_G0276977	GO:0044351	1394.85	0.713855	7.86683e-11	macropinocytosis	1	rad21
DDB_G0277011	GO:0044351	1394.85	0.713855	7.86683e-11	macropinocytosis	1	DDB_G0277011
DDB_G0277015	GO:0044351	1394.85	0.713855	7.86683e-11	macropinocytosis	0	msp
DDB_G0277033	GO:0044351	1394.85	0.713855	7.86683e-11	macropinocytosis	1	swi3
DDB_G0277041	GO:0044351	1394.85	0.713855	7.86683e-11	macropinocytosis	1	rheb
DDB_G0277087	GO:0044351	1394.85	0.713855	7.86683e-11	macropinocytosis	1	purH
DDB_G0277089	GO:0044351	1394.85	0.713855	7.86683e-11	macropinocytosis	0	NA
DDB_G0277101	GO:0044351	1394.85	0.713855	7.86683e-11	macropinocytosis	1	rab11C
DDB_G0277135	GO:0044351	1394.85	0.713855	7.86683e-11	macropinocytosis	1	trappc3
DDB_G0277139	GO:0044351	1394.85	0.713855	7.86683e-11	macropinocytosis	0	apm2
DDB_G0277143	GO:0044351	1394.85	0.713855	7.86683e-11	macropinocytosis	1	gpbA
DDB_G0277149	GO:0044351	1394.85	0.713855	7.86683e-11	macropinocytosis	1	DDB_G0277149
DDB_G0277155	GO:0044351	1394.85	0.713855	7.86683e-11	macropinocytosis	0	tom40
DDB_G0277173	GO:0044351	1394.85	0.713855	7.86683e-11	macropinocytosis	1	vamp7B
DDB_G0277183	GO:0044351	1394.85	0.713855	7.86683e-11	macropinocytosis	1	H4a
DDB_G0277185	GO:0044351	1394.85	0.713855	7.86683e-11	macropinocytosis	1	NA
DDB_G0277189	GO:0044351	1394.85	0.713855	7.86683e-11	macropinocytosis	0	NA
DDB_G0277199	GO:0044351	1394.85	0.713855	7.86683e-11	macropinocytosis	1	rpc1
DDB_G0277203	GO:0044351	1394.85	0.713855	7.86683e-11	macropinocytosis	1	DDB_G0277203
DDB_G0277205	GO:0044351	1394.85	0.713855	7.86683e-11	macropinocytosis	0	DDB_G0277205
DDB_G0277213	GO:0044351	1394.85	0.713855	7.86683e-11	macropinocytosis	1	DDB_G0277213
DDB_G0277221	GO:0044351	1394.85	0.713855	7.86683e-11	macropinocytosis	1	chcA
DDB_G0277231	GO:0044351	1394.85	0.713855	7.86683e-11	macropinocytosis	1	ndufs8
DDB_G0277257	GO:0044351	1394.85	0.713855	7.86683e-11	macropinocytosis	0	NA
DDB_G0277267	GO:0044351	1394.85	0.713855	7.86683e-11	macropinocytosis	0	ube2n
DDB_G0277311	GO:0044351	1394.85	0.713855	7.86683e-11	macropinocytosis	1	DDB_G0277311
DDB_G0277321	GO:0044351	1394.85	0.713855	7.86683e-11	macropinocytosis	1	crtp2
DDB_G0277327	GO:0044351	1394.85	0.713855	7.86683e-11	macropinocytosis	0	NA
DDB_G0277345	GO:0044351	1394.85	0.713855	7.86683e-11	macropinocytosis	1	rps3a
DDB_G0277377	GO:0044351	1394.85	0.713855	7.86683e-11	macropinocytosis	0	srpR
DDB_G0277399	GO:0044351	1394.85	0.713855	7.86683e-11	macropinocytosis	1	piaA
DDB_G0277401	GO:0044351	1394.85	0.713855	7.86683e-11	macropinocytosis	0	vatB
DDB_G0277435	GO:0044351	1394.85	0.713855	7.86683e-11	macropinocytosis	0	dpm3
DDB_G0277441	GO:0044351	1394.85	0.713855	7.86683e-11	macropinocytosis	1	rabJ
DDB_G0277451	GO:0044351	1394.85	0.713855	7.86683e-11	macropinocytosis	0	mgm101
DDB_G0277455	GO:0044351	1394.85	0.713855	7.86683e-11	macropinocytosis	1	plbE
DDB_G0277473	GO:0044351	1394.85	0.713855	7.86683e-11	macropinocytosis	1	DDB_G0277473
DDB_G0277477	GO:0044351	1394.85	0.713855	7.86683e-11	macropinocytosis	1	DDB_G0277477
DDB_G0277493	GO:0044351	1394.85	0.713855	7.86683e-11	macropinocytosis	1	cct6
DDB_G0277511	GO:0044351	1394.85	0.713855	7.86683e-11	macropinocytosis	1	hpd
DDB_G0277541	GO:0044351	1394.85	0.713855	7.86683e-11	macropinocytosis	1	DDB_G0277541
DDB_G0277545	GO:0044351	1394.85	0.713855	7.86683e-11	macropinocytosis	1	cyp518A1
DDB_G0277565	GO:0044351	1394.85	0.713855	7.86683e-11	macropinocytosis	0	syn5
DDB_G0277607	GO:0044351	1394.85	0.713855	7.86683e-11	macropinocytosis	1	NA
DDB_G0277615	GO:0044351	1394.85	0.713855	7.86683e-11	macropinocytosis	1	DDB_G0277615
DDB_G0277629	GO:0044351	1394.85	0.713855	7.86683e-11	macropinocytosis	1	rpl7a
DDB_G0277635	GO:0044351	1394.85	0.713855	7.86683e-11	macropinocytosis	1	rps27
DDB_G0277663	GO:0044351	1394.85	0.713855	7.86683e-11	macropinocytosis	0	DDB_G0277663
DDB_G0277677	GO:0044351	1394.85	0.713855	7.86683e-11	macropinocytosis	1	rpb11
DDB_G0277699	GO:0044351	1394.85	0.713855	7.86683e-11	macropinocytosis	1	DDB_G0277699
DDB_G0277725	GO:0044351	1394.85	0.713855	7.86683e-11	macropinocytosis	1	thfA
DDB_G0277729	GO:0044351	1394.85	0.713855	7.86683e-11	macropinocytosis	1	DDB_G0277729
DDB_G0277731	GO:0044351	1394.85	0.713855	7.86683e-11	macropinocytosis	1	DDB_G0277731
DDB_G0277745	GO:0044351	1394.85	0.713855	7.86683e-11	macropinocytosis	1	DDB_G0277745
DDB_G0277761	GO:0044351	1394.85	0.713855	7.86683e-11	macropinocytosis	1	NA
DDB_G0277793	GO:0044351	1394.85	0.713855	7.86683e-11	macropinocytosis	0	DDB_G0277793
DDB_G0277797	GO:0044351	1394.85	0.713855	7.86683e-11	macropinocytosis	1	sec24l
DDB_G0277803	GO:0044351	1394.85	0.713855	7.86683e-11	macropinocytosis	0	rpl4
DDB_G0277823	GO:0044351	1394.85	0.713855	7.86683e-11	macropinocytosis	1	alaS
DDB_G0277825	GO:0044351	1394.85	0.713855	7.86683e-11	macropinocytosis	0	arcA
DDB_G0277837	GO:0044351	1394.85	0.713855	7.86683e-11	macropinocytosis	1	cxgE
DDB_G0277847	GO:0044351	1394.85	0.713855	7.86683e-11	macropinocytosis	0	pdhC
DDB_G0277849	GO:0044351	1394.85	0.713855	7.86683e-11	macropinocytosis	0	dymA
DDB_G0277855	GO:0044351	1394.85	0.713855	7.86683e-11	macropinocytosis	1	fimA
DDB_G0277859	GO:0044351	1394.85	0.713855	7.86683e-11	macropinocytosis	1	mlcE
DDB_G0277861	GO:0044351	1394.85	0.713855	7.86683e-11	macropinocytosis	0	patA
DDB_G0277867	GO:0044351	1394.85	0.713855	7.86683e-11	macropinocytosis	1	rab1B
DDB_G0277869	GO:0044351	1394.85	0.713855	7.86683e-11	macropinocytosis	0	rac1A
DDB_G0277879	GO:0044351	1394.85	0.713855	7.86683e-11	macropinocytosis	0	ugpB
DDB_G0277881	GO:0044351	1394.85	0.713855	7.86683e-11	macropinocytosis	1	limC
DDB_G0277885	GO:0044351	1394.85	0.713855	7.86683e-11	macropinocytosis	0	gnd
DDB_G0277907	GO:0044351	1394.85	0.713855	7.86683e-11	macropinocytosis	1	rplP1
DDB_G0277909	GO:0044351	1394.85	0.713855	7.86683e-11	macropinocytosis	1	cbpP
DDB_G0277911	GO:0044351	1394.85	0.713855	7.86683e-11	macropinocytosis	1	mfeB
DDB_G0277923	GO:0044351	1394.85	0.713855	7.86683e-11	macropinocytosis	1	empD
DDB_G0277947	GO:0044351	1394.85	0.713855	7.86683e-11	macropinocytosis	1	shmt1
DDB_G0277955	GO:0044351	1394.85	0.713855	7.86683e-11	macropinocytosis	1	nup43
DDB_G0277971	GO:0044351	1394.85	0.713855	7.86683e-11	macropinocytosis	0	vatG
DDB_G0277975	GO:0044351	1394.85	0.713855	7.86683e-11	macropinocytosis	0	rpl14
DDB_G0277991	GO:0044351	1394.85	0.713855	7.86683e-11	macropinocytosis	0	etfb
DDB_G0278015	GO:0044351	1394.85	0.713855	7.86683e-11	macropinocytosis	1	DDB_G0278015
DDB_G0278023	GO:0044351	1394.85	0.713855	7.86683e-11	macropinocytosis	1	mrpl33
DDB_G0278027	GO:0044351	1394.85	0.713855	7.86683e-11	macropinocytosis	1	snrpD1
DDB_G0278031	GO:0044351	1394.85	0.713855	7.86683e-11	macropinocytosis	1	NA
DDB_G0278039	GO:0044351	1394.85	0.713855	7.86683e-11	macropinocytosis	0	rpb8
DDB_G0278047	GO:0044351	1394.85	0.713855	7.86683e-11	macropinocytosis	1	DDB_G0278047
DDB_G0278053	GO:0044351	1394.85	0.713855	7.86683e-11	macropinocytosis	1	ilvB
DDB_G0278095	GO:0044351	1394.85	0.713855	7.86683e-11	macropinocytosis	1	mecr
DDB_G0278103	GO:0044351	1394.85	0.713855	7.86683e-11	macropinocytosis	1	NA
DDB_G0278115	GO:0044351	1394.85	0.713855	7.86683e-11	macropinocytosis	1	netD
DDB_G0278117	GO:0044351	1394.85	0.713855	7.86683e-11	macropinocytosis	0	sec61b
DDB_G0278141	GO:0044351	1394.85	0.713855	7.86683e-11	macropinocytosis	1	vps11
DDB_G0278153	GO:0044351	1394.85	0.713855	7.86683e-11	macropinocytosis	0	tmem111
DDB_G0278155	GO:0044351	1394.85	0.713855	7.86683e-11	macropinocytosis	1	mai
DDB_G0278159	GO:0044351	1394.85	0.713855	7.86683e-11	macropinocytosis	0	pssA
DDB_G0278189	GO:0044351	1394.85	0.713855	7.86683e-11	macropinocytosis	1	ints11
DDB_G0278205	GO:0044351	1394.85	0.713855	7.86683e-11	macropinocytosis	1	eIF1a
DDB_G0278255	GO:0044351	1394.85	0.713855	7.86683e-11	macropinocytosis	1	DDB_G0278255
DDB_G0278259	GO:0044351	1394.85	0.713855	7.86683e-11	macropinocytosis	1	manB
DDB_G0278261	GO:0044351	1394.85	0.713855	7.86683e-11	macropinocytosis	1	DDB_G0278261
DDB_G0278263	GO:0044351	1394.85	0.713855	7.86683e-11	macropinocytosis	0	rpa12
DDB_G0278285	GO:0044351	1394.85	0.713855	7.86683e-11	macropinocytosis	1	copB2
DDB_G0278293	GO:0044351	1394.85	0.713855	7.86683e-11	macropinocytosis	0	ileS
DDB_G0278295	GO:0044351	1394.85	0.713855	7.86683e-11	macropinocytosis	1	DDB_G0278295
DDB_G0278313	GO:0044351	1394.85	0.713855	7.86683e-11	macropinocytosis	0	DDB_G0278313
DDB_G0278321	GO:0044351	1394.85	0.713855	7.86683e-11	macropinocytosis	1	gtf3C3
DDB_G0278333	GO:0044351	1394.85	0.713855	7.86683e-11	macropinocytosis	1	DDB_G0278333
DDB_G0278341	GO:0044351	1394.85	0.713855	7.86683e-11	macropinocytosis	0	DDB_G0278341
DDB_G0278345	GO:0044351	1394.85	0.713855	7.86683e-11	macropinocytosis	1	acly
DDB_G0278349	GO:0044351	1394.85	0.713855	7.86683e-11	macropinocytosis	0	tra2
DDB_G0278355	GO:0044351	1394.85	0.713855	7.86683e-11	macropinocytosis	0	DDB_G0278355
DDB_G0278371	GO:0044351	1394.85	0.713855	7.86683e-11	macropinocytosis	0	spc1
DDB_G0278395	GO:0044351	1394.85	0.713855	7.86683e-11	macropinocytosis	1	NA
DDB_G0278429	GO:0044351	1394.85	0.713855	7.86683e-11	macropinocytosis	0	rps20
DDB_G0278457	GO:0044351	1394.85	0.713855	7.86683e-11	macropinocytosis	1	ndrA
DDB_G0278471	GO:0044351	1394.85	0.713855	7.86683e-11	macropinocytosis	1	DDB_G0278471
DDB_G0278477	GO:0044351	1394.85	0.713855	7.86683e-11	macropinocytosis	1	sarB
DDB_G0278495	GO:0044351	1394.85	0.713855	7.86683e-11	macropinocytosis	1	alp
DDB_G0278539	GO:0044351	1394.85	0.713855	7.86683e-11	macropinocytosis	1	rpl5
DDB_G0278541	GO:0044351	1394.85	0.713855	7.86683e-11	macropinocytosis	0	DDB_G0278541
DDB_G0278543	GO:0044351	1394.85	0.713855	7.86683e-11	macropinocytosis	1	srpRB
DDB_G0278569	GO:0044351	1394.85	0.713855	7.86683e-11	macropinocytosis	1	DDB_G0278569
DDB_G0278571	GO:0044351	1394.85	0.713855	7.86683e-11	macropinocytosis	0	DDB_G0278571
DDB_G0278597	GO:0044351	1394.85	0.713855	7.86683e-11	macropinocytosis	0	NA
DDB_G0278607	GO:0044351	1394.85	0.713855	7.86683e-11	macropinocytosis	0	mvd
DDB_G0278609	GO:0044351	1394.85	0.713855	7.86683e-11	macropinocytosis	1	DDB_G0278609
DDB_G0278639	GO:0044351	1394.85	0.713855	7.86683e-11	macropinocytosis	1	clcD
DDB_G0278643	GO:0044351	1394.85	0.713855	7.86683e-11	macropinocytosis	0	trappc5
DDB_G0278663	GO:0044351	1394.85	0.713855	7.86683e-11	macropinocytosis	1	NA
DDB_G0278699	GO:0044351	1394.85	0.713855	7.86683e-11	macropinocytosis	1	DDB_G0278699
DDB_G0278721	GO:0044351	1394.85	0.713855	7.86683e-11	macropinocytosis	1	cprD
DDB_G0278725	GO:0044351	1394.85	0.713855	7.86683e-11	macropinocytosis	1	p17
DDB_G0278727	GO:0044351	1394.85	0.713855	7.86683e-11	macropinocytosis	1	pikA
DDB_G0278735	GO:0044351	1394.85	0.713855	7.86683e-11	macropinocytosis	0	fps
DDB_G0278773	GO:0044351	1394.85	0.713855	7.86683e-11	macropinocytosis	0	DDB_G0278773
DDB_G0278779	GO:0044351	1394.85	0.713855	7.86683e-11	macropinocytosis	1	aco2
DDB_G0278793	GO:0044351	1394.85	0.713855	7.86683e-11	macropinocytosis	1	rmd1
DDB_G0278805	GO:0044351	1394.85	0.713855	7.86683e-11	macropinocytosis	1	mdm10
DDB_G0278809	GO:0044351	1394.85	0.713855	7.86683e-11	macropinocytosis	1	cepG
DDB_G0278815	GO:0044351	1394.85	0.713855	7.86683e-11	macropinocytosis	1	eIF5b
DDB_G0278819	GO:0044351	1394.85	0.713855	7.86683e-11	macropinocytosis	1	DDB_G0278819
DDB_G0278821	GO:0044351	1394.85	0.713855	7.86683e-11	macropinocytosis	1	snrpF
DDB_G0278831	GO:0044351	1394.85	0.713855	7.86683e-11	macropinocytosis	0	DDB_G0278831
DDB_G0278843	GO:0044351	1394.85	0.713855	7.86683e-11	macropinocytosis	1	taf11
DDB_G0278847	GO:0044351	1394.85	0.713855	7.86683e-11	macropinocytosis	0	psmA6
DDB_G0278849	GO:0044351	1394.85	0.713855	7.86683e-11	macropinocytosis	0	etfdh
DDB_G0278873	GO:0044351	1394.85	0.713855	7.86683e-11	macropinocytosis	0	gnpda1
DDB_G0278885	GO:0044351	1394.85	0.713855	7.86683e-11	macropinocytosis	0	sec61a
DDB_G0278891	GO:0044351	1394.85	0.713855	7.86683e-11	macropinocytosis	1	DDB_G0278891
DDB_G0278893	GO:0044351	1394.85	0.713855	7.86683e-11	macropinocytosis	1	suox
DDB_G0278907	GO:0044351	1394.85	0.713855	7.86683e-11	macropinocytosis	0	mobA
DDB_G0278959	GO:0044351	1394.85	0.713855	7.86683e-11	macropinocytosis	1	rpl9
DDB_G0278967	GO:0044351	1394.85	0.713855	7.86683e-11	macropinocytosis	0	eif2s3
DDB_G0278969	GO:0044351	1394.85	0.713855	7.86683e-11	macropinocytosis	0	empC
DDB_G0278981	GO:0044351	1394.85	0.713855	7.86683e-11	macropinocytosis	0	DDB_G0278981
DDB_G0278987	GO:0044351	1394.85	0.713855	7.86683e-11	macropinocytosis	1	DDB_G0278987
DDB_G0278991	GO:0044351	1394.85	0.713855	7.86683e-11	macropinocytosis	0	culE
DDB_G0279001	GO:0044351	1394.85	0.713855	7.86683e-11	macropinocytosis	1	gmkA
DDB_G0279011	GO:0044351	1394.85	0.713855	7.86683e-11	macropinocytosis	0	DDB_G0279011
DDB_G0279013	GO:0044351	1394.85	0.713855	7.86683e-11	macropinocytosis	1	nola1
DDB_G0279039	GO:0044351	1394.85	0.713855	7.86683e-11	macropinocytosis	1	NA
DDB_G0279047	GO:0044351	1394.85	0.713855	7.86683e-11	macropinocytosis	0	DDB_G0279047
DDB_G0279059	GO:0044351	1394.85	0.713855	7.86683e-11	macropinocytosis	1	DDB_G0279059
DDB_G0279061	GO:0044351	1394.85	0.713855	7.86683e-11	macropinocytosis	0	rpl31
DDB_G0279081	GO:0044351	1394.85	0.713855	7.86683e-11	macropinocytosis	0	abpB
DDB_G0279095	GO:0044351	1394.85	0.713855	7.86683e-11	macropinocytosis	0	ptsA
DDB_G0279103	GO:0044351	1394.85	0.713855	7.86683e-11	macropinocytosis	1	DDB_G0279103
DDB_G0279109	GO:0044351	1394.85	0.713855	7.86683e-11	macropinocytosis	0	eif3C
DDB_G0279133	GO:0044351	1394.85	0.713855	7.86683e-11	macropinocytosis	0	syn7B
DDB_G0279137	GO:0044351	1394.85	0.713855	7.86683e-11	macropinocytosis	0	DDB_G0279137
DDB_G0279141	GO:0044351	1394.85	0.713855	7.86683e-11	macropinocytosis	0	ap1b1
DDB_G0279143	GO:0044351	1394.85	0.713855	7.86683e-11	macropinocytosis	0	DDB_G0279143
DDB_G0279145	GO:0044351	1394.85	0.713855	7.86683e-11	macropinocytosis	1	DDB_G0279145
DDB_G0279151	GO:0044351	1394.85	0.713855	7.86683e-11	macropinocytosis	1	cenB
DDB_G0279159	GO:0044351	1394.85	0.713855	7.86683e-11	macropinocytosis	1	aco1
DDB_G0279169	GO:0044351	1394.85	0.713855	7.86683e-11	macropinocytosis	1	vps39
DDB_G0279175	GO:0044351	1394.85	0.713855	7.86683e-11	macropinocytosis	0	hspc300
DDB_G0279183	GO:0044351	1394.85	0.713855	7.86683e-11	macropinocytosis	1	kil2
DDB_G0279185	GO:0044351	1394.85	0.713855	7.86683e-11	macropinocytosis	0	cprF
DDB_G0279187	GO:0044351	1394.85	0.713855	7.86683e-11	macropinocytosis	1	cprG
DDB_G0279189	GO:0044351	1394.85	0.713855	7.86683e-11	macropinocytosis	0	rpl11
DDB_G0279191	GO:0044351	1394.85	0.713855	7.86683e-11	macropinocytosis	0	vacB
DDB_G0279193	GO:0044351	1394.85	0.713855	7.86683e-11	macropinocytosis	1	rpb1
DDB_G0279205	GO:0044351	1394.85	0.713855	7.86683e-11	macropinocytosis	1	DDB_G0279205
DDB_G0279207	GO:0044351	1394.85	0.713855	7.86683e-11	macropinocytosis	0	rps19
DDB_G0279211	GO:0044351	1394.85	0.713855	7.86683e-11	macropinocytosis	1	DDB_G0279211
DDB_G0279227	GO:0044351	1394.85	0.713855	7.86683e-11	macropinocytosis	1	DDB_G0279227
DDB_G0279271	GO:0044351	1394.85	0.713855	7.86683e-11	macropinocytosis	0	DDB_G0279271
DDB_G0279277	GO:0044351	1394.85	0.713855	7.86683e-11	macropinocytosis	1	DDB_G0279277
DDB_G0279287	GO:0044351	1394.85	0.713855	7.86683e-11	macropinocytosis	0	DDB_G0279287
DDB_G0279289	GO:0044351	1394.85	0.713855	7.86683e-11	macropinocytosis	0	pmmA
DDB_G0279291	GO:0044351	1394.85	0.713855	7.86683e-11	macropinocytosis	1	DDB_G0279291
DDB_G0279301	GO:0044351	1394.85	0.713855	7.86683e-11	macropinocytosis	1	cax1
DDB_G0279303	GO:0044351	1394.85	0.713855	7.86683e-11	macropinocytosis	1	slob2
DDB_G0279307	GO:0044351	1394.85	0.713855	7.86683e-11	macropinocytosis	1	NA
DDB_G0279315	GO:0044351	1394.85	0.713855	7.86683e-11	macropinocytosis	1	gacN
DDB_G0279365	GO:0044351	1394.85	0.713855	7.86683e-11	macropinocytosis	1	NA
DDB_G0279373	GO:0044351	1394.85	0.713855	7.86683e-11	macropinocytosis	1	snf5
DDB_G0279387	GO:0044351	1394.85	0.713855	7.86683e-11	macropinocytosis	0	rpl21
DDB_G0279403	GO:0044351	1394.85	0.713855	7.86683e-11	macropinocytosis	0	cyp51
DDB_G0279407	GO:0044351	1394.85	0.713855	7.86683e-11	macropinocytosis	0	calA
DDB_G0279409	GO:0044351	1394.85	0.713855	7.86683e-11	macropinocytosis	0	cbfA
DDB_G0279411	GO:0044351	1394.85	0.713855	7.86683e-11	macropinocytosis	1	ctsD
DDB_G0279415	GO:0044351	1394.85	0.713855	7.86683e-11	macropinocytosis	0	limE
DDB_G0279437	GO:0044351	1394.85	0.713855	7.86683e-11	macropinocytosis	1	DDB_G0279437
DDB_G0279443	GO:0044351	1394.85	0.713855	7.86683e-11	macropinocytosis	1	aqpB
DDB_G0279485	GO:0044351	1394.85	0.713855	7.86683e-11	macropinocytosis	1	DDB_G0279485
DDB_G0279487	GO:0044351	1394.85	0.713855	7.86683e-11	macropinocytosis	1	DDB_G0279487
DDB_G0279527	GO:0044351	1394.85	0.713855	7.86683e-11	macropinocytosis	1	DDB_G0279527
DDB_G0279537	GO:0044351	1394.85	0.713855	7.86683e-11	macropinocytosis	1	ap3d1
DDB_G0279539	GO:0044351	1394.85	0.713855	7.86683e-11	macropinocytosis	0	DDB_G0279539
DDB_G0279549	GO:0044351	1394.85	0.713855	7.86683e-11	macropinocytosis	0	eif3G
DDB_G0279561	GO:0044351	1394.85	0.713855	7.86683e-11	macropinocytosis	1	DDB_G0279561
DDB_G0279565	GO:0044351	1394.85	0.713855	7.86683e-11	macropinocytosis	1	NA
DDB_G0279571	GO:0044351	1394.85	0.713855	7.86683e-11	macropinocytosis	1	DDB_G0279571
DDB_G0279587	GO:0044351	1394.85	0.713855	7.86683e-11	macropinocytosis	0	NA
DDB_G0279591	GO:0044351	1394.85	0.713855	7.86683e-11	macropinocytosis	0	glnA3
DDB_G0279601	GO:0044351	1394.85	0.713855	7.86683e-11	macropinocytosis	1	utp6
DDB_G0279605	GO:0044351	1394.85	0.713855	7.86683e-11	macropinocytosis	0	racB
DDB_G0279607	GO:0044351	1394.85	0.713855	7.86683e-11	macropinocytosis	1	forA
DDB_G0279611	GO:0044351	1394.85	0.713855	7.86683e-11	macropinocytosis	0	DDB_G0279611
DDB_G0279613	GO:0044351	1394.85	0.713855	7.86683e-11	macropinocytosis	1	DDB_G0279613
DDB_G0279627	GO:0044351	1394.85	0.713855	7.86683e-11	macropinocytosis	0	NA
DDB_G0279633	GO:0044351	1394.85	0.713855	7.86683e-11	macropinocytosis	1	psmD7
DDB_G0279659	GO:0044351	1394.85	0.713855	7.86683e-11	macropinocytosis	1	snd1
DDB_G0279667	GO:0044351	1394.85	0.713855	7.86683e-11	macropinocytosis	0	H2AX
DDB_G0279675	GO:0044351	1394.85	0.713855	7.86683e-11	macropinocytosis	1	DDB_G0279675
DDB_G0279695	GO:0044351	1394.85	0.713855	7.86683e-11	macropinocytosis	0	DDB_G0279695
DDB_G0279707	GO:0044351	1394.85	0.713855	7.86683e-11	macropinocytosis	1	NA
DDB_G0279715	GO:0044351	1394.85	0.713855	7.86683e-11	macropinocytosis	0	mtyrS
DDB_G0279717	GO:0044351	1394.85	0.713855	7.86683e-11	macropinocytosis	1	DDB_G0279717
DDB_G0279731	GO:0044351	1394.85	0.713855	7.86683e-11	macropinocytosis	0	DDB_G0279731
DDB_G0279747	GO:0044351	1394.85	0.713855	7.86683e-11	macropinocytosis	0	DDB_G0279747
DDB_G0279749	GO:0044351	1394.85	0.713855	7.86683e-11	macropinocytosis	0	NA
DDB_G0279765	GO:0044351	1394.85	0.713855	7.86683e-11	macropinocytosis	0	NA
DDB_G0279769	GO:0044351	1394.85	0.713855	7.86683e-11	macropinocytosis	0	psmG1
DDB_G0279793	GO:0044351	1394.85	0.713855	7.86683e-11	macropinocytosis	1	lap
DDB_G0279823	GO:0044351	1394.85	0.713855	7.86683e-11	macropinocytosis	0	DDB_G0279823
DDB_G0279827	GO:0044351	1394.85	0.713855	7.86683e-11	macropinocytosis	1	ivdA
DDB_G0279855	GO:0044351	1394.85	0.713855	7.86683e-11	macropinocytosis	0	mrps10
DDB_G0279909	GO:0044351	1394.85	0.713855	7.86683e-11	macropinocytosis	1	lipA
DDB_G0279911	GO:0044351	1394.85	0.713855	7.86683e-11	macropinocytosis	0	ndkM
DDB_G0279917	GO:0044351	1394.85	0.713855	7.86683e-11	macropinocytosis	1	abcD1
DDB_G0279919	GO:0044351	1394.85	0.713855	7.86683e-11	macropinocytosis	1	abcD3
DDB_G0279921	GO:0044351	1394.85	0.713855	7.86683e-11	macropinocytosis	1	gp130
DDB_G0279925	GO:0044351	1394.85	0.713855	7.86683e-11	macropinocytosis	1	mlkA
DDB_G0279943	GO:0044351	1394.85	0.713855	7.86683e-11	macropinocytosis	1	DDB_G0279943
DDB_G0279945	GO:0044351	1394.85	0.713855	7.86683e-11	macropinocytosis	1	DDB_G0279945
DDB_G0279963	GO:0044351	1394.85	0.713855	7.86683e-11	macropinocytosis	1	DDB_G0279963
DDB_G0279965	GO:0044351	1394.85	0.713855	7.86683e-11	macropinocytosis	1	DDB_G0279965
DDB_G0279997	GO:0044351	1394.85	0.713855	7.86683e-11	macropinocytosis	0	rpl18
DDB_G0279999	GO:0044351	1394.85	0.713855	7.86683e-11	macropinocytosis	1	DDB_G0279999
DDB_G0280003	GO:0044351	1394.85	0.713855	7.86683e-11	macropinocytosis	1	DDB_G0280003
DDB_G0280021	GO:0044351	1394.85	0.713855	7.86683e-11	macropinocytosis	0	mcfL
DDB_G0280037	GO:0044351	1394.85	0.713855	7.86683e-11	macropinocytosis	1	ddj1
DDB_G0280041	GO:0044351	1394.85	0.713855	7.86683e-11	macropinocytosis	1	pyr56
DDB_G0280043	GO:0044351	1394.85	0.713855	7.86683e-11	macropinocytosis	1	rab8A
DDB_G0280045	GO:0044351	1394.85	0.713855	7.86683e-11	macropinocytosis	0	thyA
DDB_G0280055	GO:0044351	1394.85	0.713855	7.86683e-11	macropinocytosis	1	abcC2
DDB_G0280057	GO:0044351	1394.85	0.713855	7.86683e-11	macropinocytosis	1	grp94
DDB_G0280061	GO:0044351	1394.85	0.713855	7.86683e-11	macropinocytosis	0	sybA
DDB_G0280105	GO:0044351	1394.85	0.713855	7.86683e-11	macropinocytosis	1	DDB_G0280105
DDB_G0280119	GO:0044351	1394.85	0.713855	7.86683e-11	macropinocytosis	1	NA
DDB_G0280135	GO:0044351	1394.85	0.713855	7.86683e-11	macropinocytosis	0	DDB_G0280135
DDB_G0280145	GO:0044351	1394.85	0.713855	7.86683e-11	macropinocytosis	1	DDB_G0280145
DDB_G0280159	GO:0044351	1394.85	0.713855	7.86683e-11	macropinocytosis	1	DDB_G0280159
DDB_G0280177	GO:0044351	1394.85	0.713855	7.86683e-11	macropinocytosis	1	NA
DDB_G0280179	GO:0044351	1394.85	0.713855	7.86683e-11	macropinocytosis	0	NA
DDB_G0280185	GO:0044351	1394.85	0.713855	7.86683e-11	macropinocytosis	1	DDB_G0280185
DDB_G0280187	GO:0044351	1394.85	0.713855	7.86683e-11	macropinocytosis	1	DDB_G0280187
DDB_G0280195	GO:0044351	1394.85	0.713855	7.86683e-11	macropinocytosis	1	hdaC
DDB_G0280229	GO:0044351	1394.85	0.713855	7.86683e-11	macropinocytosis	0	rpl24
DDB_G0280235	GO:0044351	1394.85	0.713855	7.86683e-11	macropinocytosis	1	DDB_G0280235
DDB_G0280247	GO:0044351	1394.85	0.713855	7.86683e-11	macropinocytosis	1	DDB_G0280247
DDB_G0280255	GO:0044351	1394.85	0.713855	7.86683e-11	macropinocytosis	1	mdhC
DDB_G0280283	GO:0044351	1394.85	0.713855	7.86683e-11	macropinocytosis	0	NA
DDB_G0280313	GO:0044351	1394.85	0.713855	7.86683e-11	macropinocytosis	0	ssr2
DDB_G0280317	GO:0044351	1394.85	0.713855	7.86683e-11	macropinocytosis	1	DDB_G0280317
DDB_G0280319	GO:0044351	1394.85	0.713855	7.86683e-11	macropinocytosis	1	glud2
DDB_G0280343	GO:0044351	1394.85	0.713855	7.86683e-11	macropinocytosis	1	NA
DDB_G0280345	GO:0044351	1394.85	0.713855	7.86683e-11	macropinocytosis	1	sgtA
DDB_G0280351	GO:0044351	1394.85	0.713855	7.86683e-11	macropinocytosis	0	gpaL
DDB_G0280353	GO:0044351	1394.85	0.713855	7.86683e-11	macropinocytosis	1	odhA
DDB_G0280393	GO:0044351	1394.85	0.713855	7.86683e-11	macropinocytosis	1	DDB_G0280393
DDB_G0280401	GO:0044351	1394.85	0.713855	7.86683e-11	macropinocytosis	0	cypD
DDB_G0280423	GO:0044351	1394.85	0.713855	7.86683e-11	macropinocytosis	0	DDB_G0280423
DDB_G0280439	GO:0044351	1394.85	0.713855	7.86683e-11	macropinocytosis	0	cpiB
DDB_G0280445	GO:0044351	1394.85	0.713855	7.86683e-11	macropinocytosis	1	DDB_G0280445
DDB_G0280465	GO:0044351	1394.85	0.713855	7.86683e-11	macropinocytosis	1	DDB_G0280465
DDB_G0280471	GO:0044351	1394.85	0.713855	7.86683e-11	macropinocytosis	1	DDB_G0280471
DDB_G0280475	GO:0044351	1394.85	0.713855	7.86683e-11	macropinocytosis	0	coq7
DDB_G0280495	GO:0044351	1394.85	0.713855	7.86683e-11	macropinocytosis	0	fumH
DDB_G0280533	GO:0044351	1394.85	0.713855	7.86683e-11	macropinocytosis	0	lmcB
DDB_G0280535	GO:0044351	1394.85	0.713855	7.86683e-11	macropinocytosis	0	sdhA
DDB_G0280545	GO:0044351	1394.85	0.713855	7.86683e-11	macropinocytosis	1	act7
DDB_G0280567	GO:0044351	1394.85	0.713855	7.86683e-11	macropinocytosis	1	ctps
DDB_G0280569	GO:0044351	1394.85	0.713855	7.86683e-11	macropinocytosis	1	uqcrq
DDB_G0280579	GO:0044351	1394.85	0.713855	7.86683e-11	macropinocytosis	1	NA
DDB_G0280585	GO:0044351	1394.85	0.713855	7.86683e-11	macropinocytosis	1	ubqK
DDB_G0280595	GO:0044351	1394.85	0.713855	7.86683e-11	macropinocytosis	1	ndufb7
DDB_G0280755	GO:0044351	1394.85	0.713855	7.86683e-11	macropinocytosis	0	ubqB
DDB_G0280775	GO:0044351	1394.85	0.713855	7.86683e-11	macropinocytosis	1	rvb2
DDB_G0280797	GO:0044351	1394.85	0.713855	7.86683e-11	macropinocytosis	1	DDB_G0280797
DDB_G0280801	GO:0044351	1394.85	0.713855	7.86683e-11	macropinocytosis	1	NA
DDB_G0280815	GO:0044351	1394.85	0.713855	7.86683e-11	macropinocytosis	0	trrA
DDB_G0280819	GO:0044351	1394.85	0.713855	7.86683e-11	macropinocytosis	0	aoxA
DDB_G0280823	GO:0044351	1394.85	0.713855	7.86683e-11	macropinocytosis	0	rps6
DDB_G0280825	GO:0044351	1394.85	0.713855	7.86683e-11	macropinocytosis	0	DDB_G0280825
DDB_G0280827	GO:0044351	1394.85	0.713855	7.86683e-11	macropinocytosis	1	trappc4
DDB_G0280881	GO:0044351	1394.85	0.713855	7.86683e-11	macropinocytosis	1	DDB_G0280881
DDB_G0280887	GO:0044351	1394.85	0.713855	7.86683e-11	macropinocytosis	0	arpD
DDB_G0280909	GO:0044351	1394.85	0.713855	7.86683e-11	macropinocytosis	0	tal
DDB_G0280923	GO:0044351	1394.85	0.713855	7.86683e-11	macropinocytosis	1	NA
DDB_G0280969	GO:0044351	1394.85	0.713855	7.86683e-11	macropinocytosis	1	psmA4
DDB_G0280975	GO:0044351	1394.85	0.713855	7.86683e-11	macropinocytosis	1	racE
DDB_G0280985	GO:0044351	1394.85	0.713855	7.86683e-11	macropinocytosis	0	udpB
DDB_G0280989	GO:0044351	1394.85	0.713855	7.86683e-11	macropinocytosis	1	hop2
DDB_G0280993	GO:0044351	1394.85	0.713855	7.86683e-11	macropinocytosis	0	DDB_G0280993
DDB_G0281027	GO:0044351	1394.85	0.713855	7.86683e-11	macropinocytosis	0	NA
DDB_G0281045	GO:0044351	1394.85	0.713855	7.86683e-11	macropinocytosis	1	DDB_G0281045
DDB_G0281051	GO:0044351	1394.85	0.713855	7.86683e-11	macropinocytosis	0	psmD12
DDB_G0281067	GO:0044351	1394.85	0.713855	7.86683e-11	macropinocytosis	1	DDB_G0281067
DDB_G0281069	GO:0044351	1394.85	0.713855	7.86683e-11	macropinocytosis	1	DDB_G0281069
DDB_G0281071	GO:0044351	1394.85	0.713855	7.86683e-11	macropinocytosis	0	serA
DDB_G0281093	GO:0044351	1394.85	0.713855	7.86683e-11	macropinocytosis	1	rpl37A
DDB_G0281101	GO:0044351	1394.85	0.713855	7.86683e-11	macropinocytosis	1	ldhA
DDB_G0281103	GO:0044351	1394.85	0.713855	7.86683e-11	macropinocytosis	1	gpt10
DDB_G0281109	GO:0044351	1394.85	0.713855	7.86683e-11	macropinocytosis	0	odc
DDB_G0281151	GO:0044351	1394.85	0.713855	7.86683e-11	macropinocytosis	0	DDB_G0281151
DDB_G0281153	GO:0044351	1394.85	0.713855	7.86683e-11	macropinocytosis	1	eif3H
DDB_G0281165	GO:0044351	1394.85	0.713855	7.86683e-11	macropinocytosis	0	DDB_G0281165
DDB_G0281171	GO:0044351	1394.85	0.713855	7.86683e-11	macropinocytosis	0	oxaB
DDB_G0281177	GO:0044351	1394.85	0.713855	7.86683e-11	macropinocytosis	0	tmem208
DDB_G0281207	GO:0044351	1394.85	0.713855	7.86683e-11	macropinocytosis	1	DDB_G0281207
DDB_G0281255	GO:0044351	1394.85	0.713855	7.86683e-11	macropinocytosis	1	sec24
DDB_G0281287	GO:0044351	1394.85	0.713855	7.86683e-11	macropinocytosis	1	NA
DDB_G0281291	GO:0044351	1394.85	0.713855	7.86683e-11	macropinocytosis	1	DDB_G0281291
DDB_G0281293	GO:0044351	1394.85	0.713855	7.86683e-11	macropinocytosis	1	ddiA
DDB_G0281313	GO:0044351	1394.85	0.713855	7.86683e-11	macropinocytosis	1	DDB_G0281313
DDB_G0281315	GO:0044351	1394.85	0.713855	7.86683e-11	macropinocytosis	1	psmD11
DDB_G0281325	GO:0044351	1394.85	0.713855	7.86683e-11	macropinocytosis	1	DDB_G0281325
DDB_G0281337	GO:0044351	1394.85	0.713855	7.86683e-11	macropinocytosis	0	rab14
DDB_G0281341	GO:0044351	1394.85	0.713855	7.86683e-11	macropinocytosis	0	NA
DDB_G0281351	GO:0044351	1394.85	0.713855	7.86683e-11	macropinocytosis	0	trappc12
DDB_G0281367	GO:0044351	1394.85	0.713855	7.86683e-11	macropinocytosis	0	DDB_G0281367
DDB_G0281381	GO:0044351	1394.85	0.713855	7.86683e-11	macropinocytosis	0	dstA
DDB_G0281383	GO:0044351	1394.85	0.713855	7.86683e-11	macropinocytosis	1	glpV
DDB_G0281385	GO:0044351	1394.85	0.713855	7.86683e-11	macropinocytosis	1	rasC
DDB_G0281393	GO:0044351	1394.85	0.713855	7.86683e-11	macropinocytosis	1	cxdA
DDB_G0281403	GO:0044351	1394.85	0.713855	7.86683e-11	macropinocytosis	1	nacA
DDB_G0281425	GO:0044351	1394.85	0.713855	7.86683e-11	macropinocytosis	0	DDB_G0281425
DDB_G0281435	GO:0044351	1394.85	0.713855	7.86683e-11	macropinocytosis	1	mrpl17
DDB_G0281465	GO:0044351	1394.85	0.713855	7.86683e-11	macropinocytosis	1	DDB_G0281465
DDB_G0281487	GO:0044351	1394.85	0.713855	7.86683e-11	macropinocytosis	0	DDB_G0281487
DDB_G0281489	GO:0044351	1394.85	0.713855	7.86683e-11	macropinocytosis	1	DDB_G0281489
DDB_G0281495	GO:0044351	1394.85	0.713855	7.86683e-11	macropinocytosis	0	NA
DDB_G0281499	GO:0044351	1394.85	0.713855	7.86683e-11	macropinocytosis	1	vinB
DDB_G0281537	GO:0044351	1394.85	0.713855	7.86683e-11	macropinocytosis	1	NA
DDB_G0281547	GO:0044351	1394.85	0.713855	7.86683e-11	macropinocytosis	1	amyA
DDB_G0281551	GO:0044351	1394.85	0.713855	7.86683e-11	macropinocytosis	0	guaA
DDB_G0281555	GO:0044351	1394.85	0.713855	7.86683e-11	macropinocytosis	1	kif7
DDB_G0281565	GO:0044351	1394.85	0.713855	7.86683e-11	macropinocytosis	0	rpl19
DDB_G0281569	GO:0044351	1394.85	0.713855	7.86683e-11	macropinocytosis	1	tor
DDB_G0281587	GO:0044351	1394.85	0.713855	7.86683e-11	macropinocytosis	0	yipf1
DDB_G0281601	GO:0044351	1394.85	0.713855	7.86683e-11	macropinocytosis	1	DDB_G0281601
DDB_G0281605	GO:0044351	1394.85	0.713855	7.86683e-11	macropinocytosis	1	cfaD
DDB_G0281609	GO:0044351	1394.85	0.713855	7.86683e-11	macropinocytosis	0	DDB_G0281609
DDB_G0281639	GO:0044351	1394.85	0.713855	7.86683e-11	macropinocytosis	1	gnbp
DDB_G0281669	GO:0044351	1394.85	0.713855	7.86683e-11	macropinocytosis	1	lmbd2B
DDB_G0281677	GO:0044351	1394.85	0.713855	7.86683e-11	macropinocytosis	1	rps26
DDB_G0281699	GO:0044351	1394.85	0.713855	7.86683e-11	macropinocytosis	1	DDB_G0281699
DDB_G0281739	GO:0044351	1394.85	0.713855	7.86683e-11	macropinocytosis	0	gacY
DDB_G0281741	GO:0044351	1394.85	0.713855	7.86683e-11	macropinocytosis	1	cct3
DDB_G0281775	GO:0044351	1394.85	0.713855	7.86683e-11	macropinocytosis	1	DDB_G0281775
DDB_G0281795	GO:0044351	1394.85	0.713855	7.86683e-11	macropinocytosis	0	nacB
DDB_G0281815	GO:0044351	1394.85	0.713855	7.86683e-11	macropinocytosis	0	DDB_G0281815
DDB_G0281821	GO:0044351	1394.85	0.713855	7.86683e-11	macropinocytosis	1	eloB
DDB_G0281823	GO:0044351	1394.85	0.713855	7.86683e-11	macropinocytosis	1	tpp1F
DDB_G0281849	GO:0044351	1394.85	0.713855	7.86683e-11	macropinocytosis	0	cct5
DDB_G0281861	GO:0044351	1394.85	0.713855	7.86683e-11	macropinocytosis	1	DDB_G0281861
DDB_G0281875	GO:0044351	1394.85	0.713855	7.86683e-11	macropinocytosis	0	NA
DDB_G0281899	GO:0044351	1394.85	0.713855	7.86683e-11	macropinocytosis	1	drkC
DDB_G0281909	GO:0044351	1394.85	0.713855	7.86683e-11	macropinocytosis	1	DDB_G0281909
DDB_G0281913	GO:0044351	1394.85	0.713855	7.86683e-11	macropinocytosis	1	DDB_G0281913
DDB_G0281925	GO:0044351	1394.85	0.713855	7.86683e-11	macropinocytosis	1	DDB_G0281925
DDB_G0281933	GO:0044351	1394.85	0.713855	7.86683e-11	macropinocytosis	1	nola4
DDB_G0281935	GO:0044351	1394.85	0.713855	7.86683e-11	macropinocytosis	1	DDB_G0281935
DDB_G0281945	GO:0044351	1394.85	0.713855	7.86683e-11	macropinocytosis	1	DDB_G0281945
DDB_G0281957	GO:0044351	1394.85	0.713855	7.86683e-11	macropinocytosis	0	ap1g1
DDB_G0281961	GO:0044351	1394.85	0.713855	7.86683e-11	macropinocytosis	0	DDB_G0281961
DDB_G0281967	GO:0044351	1394.85	0.713855	7.86683e-11	macropinocytosis	1	DDB_G0281967
DDB_G0281969	GO:0044351	1394.85	0.713855	7.86683e-11	macropinocytosis	0	mybE
DDB_G0281981	GO:0044351	1394.85	0.713855	7.86683e-11	macropinocytosis	1	NA
DDB_G0281985	GO:0044351	1394.85	0.713855	7.86683e-11	macropinocytosis	0	sec23
DDB_G0282033	GO:0044351	1394.85	0.713855	7.86683e-11	macropinocytosis	1	DDB_G0282033
DDB_G0282067	GO:0044351	1394.85	0.713855	7.86683e-11	macropinocytosis	1	zntB
DDB_G0282097	GO:0044351	1394.85	0.713855	7.86683e-11	macropinocytosis	0	cxfA
DDB_G0282103	GO:0044351	1394.85	0.713855	7.86683e-11	macropinocytosis	1	abcG24
DDB_G0282141	GO:0044351	1394.85	0.713855	7.86683e-11	macropinocytosis	1	hatA
DDB_G0282143	GO:0044351	1394.85	0.713855	7.86683e-11	macropinocytosis	1	hatB
DDB_G0282153	GO:0044351	1394.85	0.713855	7.86683e-11	macropinocytosis	1	aplH
DDB_G0282183	GO:0044351	1394.85	0.713855	7.86683e-11	macropinocytosis	1	cyp513A1
DDB_G0282189	GO:0044351	1394.85	0.713855	7.86683e-11	macropinocytosis	0	tupA
DDB_G0282195	GO:0044351	1394.85	0.713855	7.86683e-11	macropinocytosis	1	timm16
DDB_G0282201	GO:0044351	1394.85	0.713855	7.86683e-11	macropinocytosis	1	DDB_G0282201
DDB_G0282221	GO:0044351	1394.85	0.713855	7.86683e-11	macropinocytosis	1	NA
DDB_G0282229	GO:0044351	1394.85	0.713855	7.86683e-11	macropinocytosis	1	DDB_G0282229
DDB_G0282237	GO:0044351	1394.85	0.713855	7.86683e-11	macropinocytosis	0	DDB_G0282237
DDB_G0282243	GO:0044351	1394.85	0.713855	7.86683e-11	macropinocytosis	0	nhp2l1
DDB_G0282261	GO:0044351	1394.85	0.713855	7.86683e-11	macropinocytosis	0	ech1
DDB_G0282267	GO:0044351	1394.85	0.713855	7.86683e-11	macropinocytosis	1	DDB_G0282267
DDB_G0282313	GO:0044351	1394.85	0.713855	7.86683e-11	macropinocytosis	1	DDB_G0282313
DDB_G0282337	GO:0044351	1394.85	0.713855	7.86683e-11	macropinocytosis	1	DDB_G0282337
DDB_G0282339	GO:0044351	1394.85	0.713855	7.86683e-11	macropinocytosis	0	rpa5
DDB_G0282357	GO:0044351	1394.85	0.713855	7.86683e-11	macropinocytosis	1	pksB
DDB_G0282359	GO:0044351	1394.85	0.713855	7.86683e-11	macropinocytosis	0	ppiA
DDB_G0282361	GO:0044351	1394.85	0.713855	7.86683e-11	macropinocytosis	1	prlA
DDB_G0282379	GO:0044351	1394.85	0.713855	7.86683e-11	macropinocytosis	1	rpl28
DDB_G0282409	GO:0044351	1394.85	0.713855	7.86683e-11	macropinocytosis	1	DDB_G0282409
DDB_G0282423	GO:0044351	1394.85	0.713855	7.86683e-11	macropinocytosis	1	ponD
DDB_G0282433	GO:0044351	1394.85	0.713855	7.86683e-11	macropinocytosis	0	NA
DDB_G0282447	GO:0044351	1394.85	0.713855	7.86683e-11	macropinocytosis	0	NA
DDB_G0282451	GO:0044351	1394.85	0.713855	7.86683e-11	macropinocytosis	0	DDB_G0282451
DDB_G0282473	GO:0044351	1394.85	0.713855	7.86683e-11	macropinocytosis	1	ints9
DDB_G0282483	GO:0044351	1394.85	0.713855	7.86683e-11	macropinocytosis	1	DDB_G0282483
DDB_G0282485	GO:0044351	1394.85	0.713855	7.86683e-11	macropinocytosis	1	cepB
DDB_G0282493	GO:0044351	1394.85	0.713855	7.86683e-11	macropinocytosis	1	aatB
DDB_G0282517	GO:0044351	1394.85	0.713855	7.86683e-11	macropinocytosis	1	DDB_G0282517
DDB_G0282527	GO:0044351	1394.85	0.713855	7.86683e-11	macropinocytosis	0	pemtA
DDB_G0282529	GO:0044351	1394.85	0.713855	7.86683e-11	macropinocytosis	1	rbbD
DDB_G0282539	GO:0044351	1394.85	0.713855	7.86683e-11	macropinocytosis	1	nagB
DDB_G0282559	GO:0044351	1394.85	0.713855	7.86683e-11	macropinocytosis	1	dduA
DDB_G0282563	GO:0044351	1394.85	0.713855	7.86683e-11	macropinocytosis	1	DDB_G0282563
DDB_G0282579	GO:0044351	1394.85	0.713855	7.86683e-11	macropinocytosis	1	pldZ
DDB_G0282581	GO:0044351	1394.85	0.713855	7.86683e-11	macropinocytosis	1	wdr45l
DDB_G0282595	GO:0044351	1394.85	0.713855	7.86683e-11	macropinocytosis	1	gmfA
DDB_G0282601	GO:0044351	1394.85	0.713855	7.86683e-11	macropinocytosis	0	rps11
DDB_G0282619	GO:0044351	1394.85	0.713855	7.86683e-11	macropinocytosis	1	NA
DDB_G0282683	GO:0044351	1394.85	0.713855	7.86683e-11	macropinocytosis	1	DDB_G0282683
DDB_G0282707	GO:0044351	1394.85	0.713855	7.86683e-11	macropinocytosis	1	DDB_G0282707
DDB_G0282723	GO:0044351	1394.85	0.713855	7.86683e-11	macropinocytosis	1	tmem104
DDB_G0282739	GO:0044351	1394.85	0.713855	7.86683e-11	macropinocytosis	0	rpb4
DDB_G0282767	GO:0044351	1394.85	0.713855	7.86683e-11	macropinocytosis	0	NA
DDB_G0282801	GO:0044351	1394.85	0.713855	7.86683e-11	macropinocytosis	1	DDB_G0282801
DDB_G0282813	GO:0044351	1394.85	0.713855	7.86683e-11	macropinocytosis	1	arcB
DDB_G0282815	GO:0044351	1394.85	0.713855	7.86683e-11	macropinocytosis	1	NA
DDB_G0282817	GO:0044351	1394.85	0.713855	7.86683e-11	macropinocytosis	0	patB
DDB_G0282819	GO:0044351	1394.85	0.713855	7.86683e-11	macropinocytosis	1	sglA
DDB_G0282825	GO:0044351	1394.85	0.713855	7.86683e-11	macropinocytosis	1	yipf6
DDB_G0282831	GO:0044351	1394.85	0.713855	7.86683e-11	macropinocytosis	0	pcbd
DDB_G0282835	GO:0044351	1394.85	0.713855	7.86683e-11	macropinocytosis	0	srfB
DDB_G0282847	GO:0044351	1394.85	0.713855	7.86683e-11	macropinocytosis	1	rab5B
DDB_G0282851	GO:0044351	1394.85	0.713855	7.86683e-11	macropinocytosis	1	cepL
DDB_G0282853	GO:0044351	1394.85	0.713855	7.86683e-11	macropinocytosis	0	tpt1
DDB_G0282859	GO:0044351	1394.85	0.713855	7.86683e-11	macropinocytosis	1	DDB_G0282859
DDB_G0282863	GO:0044351	1394.85	0.713855	7.86683e-11	macropinocytosis	0	snrpG
DDB_G0282887	GO:0044351	1394.85	0.713855	7.86683e-11	macropinocytosis	1	trappc2
DDB_G0282897	GO:0044351	1394.85	0.713855	7.86683e-11	macropinocytosis	1	tom7
DDB_G0282957	GO:0044351	1394.85	0.713855	7.86683e-11	macropinocytosis	0	DDB_G0282957
DDB_G0282959	GO:0044351	1394.85	0.713855	7.86683e-11	macropinocytosis	1	DDB_G0282959
DDB_G0282967	GO:0044351	1394.85	0.713855	7.86683e-11	macropinocytosis	1	acadsb
DDB_G0282971	GO:0044351	1394.85	0.713855	7.86683e-11	macropinocytosis	1	DDB_G0282971
DDB_G0282979	GO:0044351	1394.85	0.713855	7.86683e-11	macropinocytosis	0	efa1G
DDB_G0282993	GO:0044351	1394.85	0.713855	7.86683e-11	macropinocytosis	0	sodC
DDB_G0283003	GO:0044351	1394.85	0.713855	7.86683e-11	macropinocytosis	1	DDB_G0283003
DDB_G0283013	GO:0044351	1394.85	0.713855	7.86683e-11	macropinocytosis	1	NA
DDB_G0283021	GO:0044351	1394.85	0.713855	7.86683e-11	macropinocytosis	1	sodB
DDB_G0283023	GO:0044351	1394.85	0.713855	7.86683e-11	macropinocytosis	0	hcpA
DDB_G0283081	GO:0044351	1394.85	0.713855	7.86683e-11	macropinocytosis	1	pikB
DDB_G0283087	GO:0044351	1394.85	0.713855	7.86683e-11	macropinocytosis	1	DDB_G0283087
DDB_G0283095	GO:0044351	1394.85	0.713855	7.86683e-11	macropinocytosis	1	DD3-3
DDB_G0283115	GO:0044351	1394.85	0.713855	7.86683e-11	macropinocytosis	1	cnrB
DDB_G0283121	GO:0044351	1394.85	0.713855	7.86683e-11	macropinocytosis	0	DDB_G0283121
DDB_G0283127	GO:0044351	1394.85	0.713855	7.86683e-11	macropinocytosis	1	DDB_G0283127
DDB_G0283137	GO:0044351	1394.85	0.713855	7.86683e-11	macropinocytosis	1	enoA
DDB_G0283171	GO:0044351	1394.85	0.713855	7.86683e-11	macropinocytosis	1	DDB_G0283171
DDB_G0283177	GO:0044351	1394.85	0.713855	7.86683e-11	macropinocytosis	0	NA
DDB_G0283205	GO:0044351	1394.85	0.713855	7.86683e-11	macropinocytosis	0	top1
DDB_G0283245	GO:0044351	1394.85	0.713855	7.86683e-11	macropinocytosis	0	DDB_G0283245
DDB_G0283247	GO:0044351	1394.85	0.713855	7.86683e-11	macropinocytosis	1	pyk
DDB_G0283253	GO:0044351	1394.85	0.713855	7.86683e-11	macropinocytosis	0	DDB_G0283253
DDB_G0283267	GO:0044351	1394.85	0.713855	7.86683e-11	macropinocytosis	1	shkA
DDB_G0283273	GO:0044351	1394.85	0.713855	7.86683e-11	macropinocytosis	0	mrpl51
DDB_G0283283	GO:0044351	1394.85	0.713855	7.86683e-11	macropinocytosis	1	atp5O
DDB_G0283293	GO:0044351	1394.85	0.713855	7.86683e-11	macropinocytosis	1	DDB_G0283293
DDB_G0283309	GO:0044351	1394.85	0.713855	7.86683e-11	macropinocytosis	1	DDB_G0283309
DDB_G0283311	GO:0044351	1394.85	0.713855	7.86683e-11	macropinocytosis	0	DDB_G0283311
DDB_G0283327	GO:0044351	1394.85	0.713855	7.86683e-11	macropinocytosis	0	eppA
DDB_G0283329	GO:0044351	1394.85	0.713855	7.86683e-11	macropinocytosis	1	mcfO
DDB_G0283349	GO:0044351	1394.85	0.713855	7.86683e-11	macropinocytosis	0	gpaA
DDB_G0283355	GO:0044351	1394.85	0.713855	7.86683e-11	macropinocytosis	1	swip
DDB_G0283359	GO:0044351	1394.85	0.713855	7.86683e-11	macropinocytosis	1	eftud2
DDB_G0283363	GO:0044351	1394.85	0.713855	7.86683e-11	macropinocytosis	0	vti1B
DDB_G0283365	GO:0044351	1394.85	0.713855	7.86683e-11	macropinocytosis	0	rpb12
DDB_G0283389	GO:0044351	1394.85	0.713855	7.86683e-11	macropinocytosis	1	rhgA
DDB_G0283391	GO:0044351	1394.85	0.713855	7.86683e-11	macropinocytosis	1	kinX
DDB_G0283393	GO:0044351	1394.85	0.713855	7.86683e-11	macropinocytosis	0	rplP2
DDB_G0283401	GO:0044351	1394.85	0.713855	7.86683e-11	macropinocytosis	1	ctsZ
DDB_G0283411	GO:0044351	1394.85	0.713855	7.86683e-11	macropinocytosis	1	gcdh
DDB_G0283419	GO:0044351	1394.85	0.713855	7.86683e-11	macropinocytosis	0	gpaI
DDB_G0283439	GO:0044351	1394.85	0.713855	7.86683e-11	macropinocytosis	1	DDB_G0283439
DDB_G0283473	GO:0044351	1394.85	0.713855	7.86683e-11	macropinocytosis	1	treh
DDB_G0283481	GO:0044351	1394.85	0.713855	7.86683e-11	macropinocytosis	1	DDB_G0283481
DDB_G0283497	GO:0044351	1394.85	0.713855	7.86683e-11	macropinocytosis	0	ssr1
DDB_G0283525	GO:0044351	1394.85	0.713855	7.86683e-11	macropinocytosis	1	arl8
DDB_G0283535	GO:0044351	1394.85	0.713855	7.86683e-11	macropinocytosis	1	DDB_G0283535
DDB_G0283537	GO:0044351	1394.85	0.713855	7.86683e-11	macropinocytosis	1	rasS
DDB_G0283539	GO:0044351	1394.85	0.713855	7.86683e-11	macropinocytosis	1	crtA
DDB_G0283567	GO:0044351	1394.85	0.713855	7.86683e-11	macropinocytosis	0	DDB_G0283567
DDB_G0283573	GO:0044351	1394.85	0.713855	7.86683e-11	macropinocytosis	0	tom20
DDB_G0283581	GO:0044351	1394.85	0.713855	7.86683e-11	macropinocytosis	1	utp15
DDB_G0283587	GO:0044351	1394.85	0.713855	7.86683e-11	macropinocytosis	0	csn1
DDB_G0283597	GO:0044351	1394.85	0.713855	7.86683e-11	macropinocytosis	1	eif3B
DDB_G0283601	GO:0044351	1394.85	0.713855	7.86683e-11	macropinocytosis	1	pppA
DDB_G0283603	GO:0044351	1394.85	0.713855	7.86683e-11	macropinocytosis	1	rab32A
DDB_G0283615	GO:0044351	1394.85	0.713855	7.86683e-11	macropinocytosis	1	rpkA
DDB_G0283619	GO:0044351	1394.85	0.713855	7.86683e-11	macropinocytosis	1	crlC
DDB_G0283621	GO:0044351	1394.85	0.713855	7.86683e-11	macropinocytosis	1	cutA
DDB_G0283625	GO:0044351	1394.85	0.713855	7.86683e-11	macropinocytosis	0	DDB_G0283625
DDB_G0283627	GO:0044351	1394.85	0.713855	7.86683e-11	macropinocytosis	1	prsC
DDB_G0283629	GO:0044351	1394.85	0.713855	7.86683e-11	macropinocytosis	1	zntA
DDB_G0283661	GO:0044351	1394.85	0.713855	7.86683e-11	macropinocytosis	1	ddx3
DDB_G0283669	GO:0044351	1394.85	0.713855	7.86683e-11	macropinocytosis	0	DDB_G0283669
DDB_G0283673	GO:0044351	1394.85	0.713855	7.86683e-11	macropinocytosis	0	gpi
DDB_G0283679	GO:0044351	1394.85	0.713855	7.86683e-11	macropinocytosis	1	psmB7
DDB_G0283681	GO:0044351	1394.85	0.713855	7.86683e-11	macropinocytosis	1	DDB_G0283681
DDB_G0283685	GO:0044351	1394.85	0.713855	7.86683e-11	macropinocytosis	1	utp23
DDB_G0283701	GO:0044351	1394.85	0.713855	7.86683e-11	macropinocytosis	0	guaB
DDB_G0283709	GO:0044351	1394.85	0.713855	7.86683e-11	macropinocytosis	1	osbH
DDB_G0283717	GO:0044351	1394.85	0.713855	7.86683e-11	macropinocytosis	1	pigX
DDB_G0283731	GO:0044351	1394.85	0.713855	7.86683e-11	macropinocytosis	1	DDB_G0283731
DDB_G0283735	GO:0044351	1394.85	0.713855	7.86683e-11	macropinocytosis	0	dnajc19
DDB_G0283741	GO:0044351	1394.85	0.713855	7.86683e-11	macropinocytosis	0	rpl26
DDB_G0283751	GO:0044351	1394.85	0.713855	7.86683e-11	macropinocytosis	1	mcfM
DDB_G0283755	GO:0044351	1394.85	0.713855	7.86683e-11	macropinocytosis	1	arpC
DDB_G0283757	GO:0044351	1394.85	0.713855	7.86683e-11	macropinocytosis	0	rab1A
DDB_G0283767	GO:0044351	1394.85	0.713855	7.86683e-11	macropinocytosis	0	dct
DDB_G0283795	GO:0044351	1394.85	0.713855	7.86683e-11	macropinocytosis	1	commd3
DDB_G0283803	GO:0044351	1394.85	0.713855	7.86683e-11	macropinocytosis	1	NA
DDB_G0283805	GO:0044351	1394.85	0.713855	7.86683e-11	macropinocytosis	1	adkA
DDB_G0283823	GO:0044351	1394.85	0.713855	7.86683e-11	macropinocytosis	1	DDB_G0283823
DDB_G0283829	GO:0044351	1394.85	0.713855	7.86683e-11	macropinocytosis	1	DDB_G0283829
DDB_G0283831	GO:0044351	1394.85	0.713855	7.86683e-11	macropinocytosis	1	DDB_G0283831
DDB_G0283835	GO:0044351	1394.85	0.713855	7.86683e-11	macropinocytosis	1	rae1
DDB_G0283843	GO:0044351	1394.85	0.713855	7.86683e-11	macropinocytosis	0	DDB_G0283843
DDB_G0283851	GO:0044351	1394.85	0.713855	7.86683e-11	macropinocytosis	1	DDB_G0283851
DDB_G0283871	GO:0044351	1394.85	0.713855	7.86683e-11	macropinocytosis	1	DDB_G0283871
DDB_G0283889	GO:0044351	1394.85	0.713855	7.86683e-11	macropinocytosis	0	DDB_G0283889
DDB_G0283909	GO:0044351	1394.85	0.713855	7.86683e-11	macropinocytosis	0	spc98
DDB_G0283915	GO:0044351	1394.85	0.713855	7.86683e-11	macropinocytosis	1	DDB_G0283915
DDB_G0283921	GO:0044351	1394.85	0.713855	7.86683e-11	macropinocytosis	1	ctsB
DDB_G0283951	GO:0044351	1394.85	0.713855	7.86683e-11	macropinocytosis	0	DDB_G0283951
DDB_G0283973	GO:0044351	1394.85	0.713855	7.86683e-11	macropinocytosis	1	NA
DDB_G0283987	GO:0044351	1394.85	0.713855	7.86683e-11	macropinocytosis	1	purC/E
DDB_G0283989	GO:0044351	1394.85	0.713855	7.86683e-11	macropinocytosis	1	DDB_G0283989
DDB_G0283991	GO:0044351	1394.85	0.713855	7.86683e-11	macropinocytosis	0	DDB_G0283991
DDB_G0284011	GO:0044351	1394.85	0.713855	7.86683e-11	macropinocytosis	1	DDB_G0284011
DDB_G0284015	GO:0044351	1394.85	0.713855	7.86683e-11	macropinocytosis	1	DDB_G0284015
DDB_G0284035	GO:0044351	1394.85	0.713855	7.86683e-11	macropinocytosis	0	efa1B
DDB_G0284043	GO:0044351	1394.85	0.713855	7.86683e-11	macropinocytosis	1	aplA
DDB_G0284051	GO:0044351	1394.85	0.713855	7.86683e-11	macropinocytosis	1	DDB_G0284051
DDB_G0284065	GO:0044351	1394.85	0.713855	7.86683e-11	macropinocytosis	1	rapgap9
DDB_G0284093	GO:0044351	1394.85	0.713855	7.86683e-11	macropinocytosis	0	rps16
DDB_G0284101	GO:0044351	1394.85	0.713855	7.86683e-11	macropinocytosis	1	snrpA1
DDB_G0284115	GO:0044351	1394.85	0.713855	7.86683e-11	macropinocytosis	0	NA
DDB_G0284117	GO:0044351	1394.85	0.713855	7.86683e-11	macropinocytosis	0	phbB
DDB_G0284135	GO:0044351	1394.85	0.713855	7.86683e-11	macropinocytosis	1	DDB_G0284135
DDB_G0284167	GO:0044351	1394.85	0.713855	7.86683e-11	macropinocytosis	0	rnp1A
DDB_G0284169	GO:0044351	1394.85	0.713855	7.86683e-11	macropinocytosis	0	DDB_G0284169
DDB_G0284201	GO:0044351	1394.85	0.713855	7.86683e-11	macropinocytosis	1	DDB_G0284201
DDB_G0284221	GO:0044351	1394.85	0.713855	7.86683e-11	macropinocytosis	1	atox1
DDB_G0284225	GO:0044351	1394.85	0.713855	7.86683e-11	macropinocytosis	1	ucpC
DDB_G0284237	GO:0044351	1394.85	0.713855	7.86683e-11	macropinocytosis	1	rps12
DDB_G0284241	GO:0044351	1394.85	0.713855	7.86683e-11	macropinocytosis	1	DDB_G0284241
DDB_G0284245	GO:0044351	1394.85	0.713855	7.86683e-11	macropinocytosis	1	DDB_G0284245
DDB_G0284249	GO:0044351	1394.85	0.713855	7.86683e-11	macropinocytosis	1	DDB_G0284249
DDB_G0284259	GO:0044351	1394.85	0.713855	7.86683e-11	macropinocytosis	1	DDB_G0284259
DDB_G0284265	GO:0044351	1394.85	0.713855	7.86683e-11	macropinocytosis	1	ppa1
DDB_G0284281	GO:0044351	1394.85	0.713855	7.86683e-11	macropinocytosis	0	DDB_G0284281
DDB_G0284307	GO:0044351	1394.85	0.713855	7.86683e-11	macropinocytosis	1	NA
DDB_G0284339	GO:0044351	1394.85	0.713855	7.86683e-11	macropinocytosis	1	aplN
DDB_G0284359	GO:0044351	1394.85	0.713855	7.86683e-11	macropinocytosis	1	phaZ
DDB_G0284363	GO:0044351	1394.85	0.713855	7.86683e-11	macropinocytosis	1	cf60
DDB_G0284367	GO:0044351	1394.85	0.713855	7.86683e-11	macropinocytosis	0	DDB_G0284367
DDB_G0284383	GO:0044351	1394.85	0.713855	7.86683e-11	macropinocytosis	0	DDB_G0284383
DDB_G0284385	GO:0044351	1394.85	0.713855	7.86683e-11	macropinocytosis	1	syn10
DDB_G0284407	GO:0044351	1394.85	0.713855	7.86683e-11	macropinocytosis	1	erg24
DDB_G0284431	GO:0044351	1394.85	0.713855	7.86683e-11	macropinocytosis	0	udpA
DDB_G0284443	GO:0044351	1394.85	0.713855	7.86683e-11	macropinocytosis	1	DDB_G0284443
DDB_G0284449	GO:0044351	1394.85	0.713855	7.86683e-11	macropinocytosis	1	plbD
DDB_G0284469	GO:0044351	1394.85	0.713855	7.86683e-11	macropinocytosis	1	gpaH
DDB_G0284473	GO:0044351	1394.85	0.713855	7.86683e-11	macropinocytosis	0	vatC
DDB_G0284483	GO:0044351	1394.85	0.713855	7.86683e-11	macropinocytosis	1	ints7
DDB_G0284485	GO:0044351	1394.85	0.713855	7.86683e-11	macropinocytosis	0	NA
DDB_G0284495	GO:0044351	1394.85	0.713855	7.86683e-11	macropinocytosis	1	ragC
DDB_G0284499	GO:0044351	1394.85	0.713855	7.86683e-11	macropinocytosis	1	smc2
DDB_G0284511	GO:0044351	1394.85	0.713855	7.86683e-11	macropinocytosis	1	NA
DDB_G0284517	GO:0044351	1394.85	0.713855	7.86683e-11	macropinocytosis	1	psmC6
DDB_G0284533	GO:0044351	1394.85	0.713855	7.86683e-11	macropinocytosis	0	rps13
DDB_G0284537	GO:0044351	1394.85	0.713855	7.86683e-11	macropinocytosis	1	DDB_G0284537
DDB_G0284547	GO:0044351	1394.85	0.713855	7.86683e-11	macropinocytosis	1	DDB_G0284547
DDB_G0284563	GO:0044351	1394.85	0.713855	7.86683e-11	macropinocytosis	0	cwc2
DDB_G0284571	GO:0044351	1394.85	0.713855	7.86683e-11	macropinocytosis	1	gacC
DDB_G0284579	GO:0044351	1394.85	0.713855	7.86683e-11	macropinocytosis	0	DDB_G0284579
DDB_G0284583	GO:0044351	1394.85	0.713855	7.86683e-11	macropinocytosis	0	glyS
DDB_G0284597	GO:0044351	1394.85	0.713855	7.86683e-11	macropinocytosis	1	csn5
DDB_G0284605	GO:0044351	1394.85	0.713855	7.86683e-11	macropinocytosis	1	DDB_G0284605
DDB_G0284625	GO:0044351	1394.85	0.713855	7.86683e-11	macropinocytosis	1	DDB_G0284625
DDB_G0284627	GO:0044351	1394.85	0.713855	7.86683e-11	macropinocytosis	0	DDB_G0284627
DDB_G0284629	GO:0044351	1394.85	0.713855	7.86683e-11	macropinocytosis	0	NA
DDB_G0284631	GO:0044351	1394.85	0.713855	7.86683e-11	macropinocytosis	0	NA
DDB_G0284669	GO:0044351	1394.85	0.713855	7.86683e-11	macropinocytosis	0	prsA
DDB_G0284681	GO:0044351	1394.85	0.713855	7.86683e-11	macropinocytosis	0	DDB_G0284681
DDB_G0284691	GO:0044351	1394.85	0.713855	7.86683e-11	macropinocytosis	1	DDB_G0284691
DDB_G0284693	GO:0044351	1394.85	0.713855	7.86683e-11	macropinocytosis	0	DDB_G0284693
DDB_G0284705	GO:0044351	1394.85	0.713855	7.86683e-11	macropinocytosis	0	DDB_G0284705
DDB_G0284735	GO:0044351	1394.85	0.713855	7.86683e-11	macropinocytosis	1	copB
DDB_G0284755	GO:0044351	1394.85	0.713855	7.86683e-11	macropinocytosis	1	DDB_G0284755
DDB_G0284757	GO:0044351	1394.85	0.713855	7.86683e-11	macropinocytosis	0	DDB_G0284757
DDB_G0284769	GO:0044351	1394.85	0.713855	7.86683e-11	macropinocytosis	1	vps24
DDB_G0284777	GO:0044351	1394.85	0.713855	7.86683e-11	macropinocytosis	0	DDB_G0284777
DDB_G0284799	GO:0044351	1394.85	0.713855	7.86683e-11	macropinocytosis	0	ndufa8
DDB_G0284805	GO:0044351	1394.85	0.713855	7.86683e-11	macropinocytosis	1	DDB_G0284805
DDB_G0284835	GO:0044351	1394.85	0.713855	7.86683e-11	macropinocytosis	1	aass
DDB_G0284845	GO:0044351	1394.85	0.713855	7.86683e-11	macropinocytosis	1	gxcC
DDB_G0284847	GO:0044351	1394.85	0.713855	7.86683e-11	macropinocytosis	1	DDB_G0284847
DDB_G0284861	GO:0044351	1394.85	0.713855	7.86683e-11	macropinocytosis	0	eif5a
DDB_G0284865	GO:0044351	1394.85	0.713855	7.86683e-11	macropinocytosis	0	ubcB
DDB_G0284867	GO:0044351	1394.85	0.713855	7.86683e-11	macropinocytosis	1	abcC8
DDB_G0284871	GO:0044351	1394.85	0.713855	7.86683e-11	macropinocytosis	1	DDB_G0284871
DDB_G0284879	GO:0044351	1394.85	0.713855	7.86683e-11	macropinocytosis	0	NA
DDB_G0284891	GO:0044351	1394.85	0.713855	7.86683e-11	macropinocytosis	0	rpb7
DDB_G0284911	GO:0044351	1394.85	0.713855	7.86683e-11	macropinocytosis	1	timm10
DDB_G0284917	GO:0044351	1394.85	0.713855	7.86683e-11	macropinocytosis	1	DDB_G0284917
DDB_G0284939	GO:0044351	1394.85	0.713855	7.86683e-11	macropinocytosis	0	DDB_G0284939
DDB_G0284947	GO:0044351	1394.85	0.713855	7.86683e-11	macropinocytosis	0	ucr
DDB_G0284951	GO:0044351	1394.85	0.713855	7.86683e-11	macropinocytosis	1	vamp7A
DDB_G0284963	GO:0044351	1394.85	0.713855	7.86683e-11	macropinocytosis	0	DDB_G0284963
DDB_G0284985	GO:0044351	1394.85	0.713855	7.86683e-11	macropinocytosis	0	rab1D
DDB_G0284997	GO:0044351	1394.85	0.713855	7.86683e-11	macropinocytosis	1	DDB_G0284997
DDB_G0285003	GO:0044351	1394.85	0.713855	7.86683e-11	macropinocytosis	0	aifC
DDB_G0285007	GO:0044351	1394.85	0.713855	7.86683e-11	macropinocytosis	1	prafB
DDB_G0285011	GO:0044351	1394.85	0.713855	7.86683e-11	macropinocytosis	0	DDB_G0285011
DDB_G0285019	GO:0044351	1394.85	0.713855	7.86683e-11	macropinocytosis	0	NA
DDB_G0285021	GO:0044351	1394.85	0.713855	7.86683e-11	macropinocytosis	1	DDB_G0285021
DDB_G0285025	GO:0044351	1394.85	0.713855	7.86683e-11	macropinocytosis	0	alrE
DDB_G0285033	GO:0044351	1394.85	0.713855	7.86683e-11	macropinocytosis	1	DDB_G0285033
DDB_G0285051	GO:0044351	1394.85	0.713855	7.86683e-11	macropinocytosis	0	rab32D
DDB_G0285071	GO:0044351	1394.85	0.713855	7.86683e-11	macropinocytosis	0	echs1
DDB_G0285079	GO:0044351	1394.85	0.713855	7.86683e-11	macropinocytosis	0	NA
DDB_G0285095	GO:0044351	1394.85	0.713855	7.86683e-11	macropinocytosis	1	DDB_G0285095
DDB_G0285105	GO:0044351	1394.85	0.713855	7.86683e-11	macropinocytosis	0	psmD13
DDB_G0285111	GO:0044351	1394.85	0.713855	7.86683e-11	macropinocytosis	0	snpA
DDB_G0285159	GO:0044351	1394.85	0.713855	7.86683e-11	macropinocytosis	1	stt3
DDB_G0285175	GO:0044351	1394.85	0.713855	7.86683e-11	macropinocytosis	1	vmp1
DDB_G0285193	GO:0044351	1394.85	0.713855	7.86683e-11	macropinocytosis	1	hprT
DDB_G0285205	GO:0044351	1394.85	0.713855	7.86683e-11	macropinocytosis	1	snf2a
DDB_G0285211	GO:0044351	1394.85	0.713855	7.86683e-11	macropinocytosis	0	fadA
DDB_G0285239	GO:0044351	1394.85	0.713855	7.86683e-11	macropinocytosis	0	ndufs7
DDB_G0285251	GO:0044351	1394.85	0.713855	7.86683e-11	macropinocytosis	1	rsc43
DDB_G0285253	GO:0044351	1394.85	0.713855	7.86683e-11	macropinocytosis	1	scrA
DDB_G0285267	GO:0044351	1394.85	0.713855	7.86683e-11	macropinocytosis	1	sdh
DDB_G0285277	GO:0044351	1394.85	0.713855	7.86683e-11	macropinocytosis	0	rpl17
DDB_G0285279	GO:0044351	1394.85	0.713855	7.86683e-11	macropinocytosis	0	NA
DDB_G0285281	GO:0044351	1394.85	0.713855	7.86683e-11	macropinocytosis	1	DDB_G0285281
DDB_G0285291	GO:0044351	1394.85	0.713855	7.86683e-11	macropinocytosis	0	NA
DDB_G0285293	GO:0044351	1394.85	0.713855	7.86683e-11	macropinocytosis	0	spt4
DDB_G0285311	GO:0044351	1394.85	0.713855	7.86683e-11	macropinocytosis	1	gpmA
DDB_G0285313	GO:0044351	1394.85	0.713855	7.86683e-11	macropinocytosis	1	cepH
DDB_G0285319	GO:0044351	1394.85	0.713855	7.86683e-11	macropinocytosis	0	H1
DDB_G0285339	GO:0044351	1394.85	0.713855	7.86683e-11	macropinocytosis	1	mipp1
DDB_G0285343	GO:0044351	1394.85	0.713855	7.86683e-11	macropinocytosis	1	gtf2a2
DDB_G0285345	GO:0044351	1394.85	0.713855	7.86683e-11	macropinocytosis	0	DDB_G0285345
DDB_G0285357	GO:0044351	1394.85	0.713855	7.86683e-11	macropinocytosis	1	DDB_G0285357
DDB_G0285359	GO:0044351	1394.85	0.713855	7.86683e-11	macropinocytosis	0	DDB_G0285359
DDB_G0285361	GO:0044351	1394.85	0.713855	7.86683e-11	macropinocytosis	1	rnp1B
DDB_G0285365	GO:0044351	1394.85	0.713855	7.86683e-11	macropinocytosis	1	DDB_G0285365
DDB_G0285393	GO:0044351	1394.85	0.713855	7.86683e-11	macropinocytosis	1	ints1
DDB_G0285399	GO:0044351	1394.85	0.713855	7.86683e-11	macropinocytosis	0	cyb5r1
DDB_G0285415	GO:0044351	1394.85	0.713855	7.86683e-11	macropinocytosis	0	nup85
DDB_G0285425	GO:0044351	1394.85	0.713855	7.86683e-11	macropinocytosis	0	gpaD
DDB_G0285429	GO:0044351	1394.85	0.713855	7.86683e-11	macropinocytosis	1	purA
DDB_G0285451	GO:0044351	1394.85	0.713855	7.86683e-11	macropinocytosis	1	leuS
DDB_G0285455	GO:0044351	1394.85	0.713855	7.86683e-11	macropinocytosis	1	impA
DDB_G0285459	GO:0044351	1394.85	0.713855	7.86683e-11	macropinocytosis	1	DDB_G0285459
DDB_G0285461	GO:0044351	1394.85	0.713855	7.86683e-11	macropinocytosis	0	pigK
DDB_G0285471	GO:0044351	1394.85	0.713855	7.86683e-11	macropinocytosis	1	DDB_G0285471
DDB_G0285485	GO:0044351	1394.85	0.713855	7.86683e-11	macropinocytosis	1	NA
DDB_G0285489	GO:0044351	1394.85	0.713855	7.86683e-11	macropinocytosis	0	DDB_G0285489
DDB_G0285509	GO:0044351	1394.85	0.713855	7.86683e-11	macropinocytosis	0	bcaA
DDB_G0285519	GO:0044351	1394.85	0.713855	7.86683e-11	macropinocytosis	0	DDB_G0285519
DDB_G0285533	GO:0044351	1394.85	0.713855	7.86683e-11	macropinocytosis	0	ppt1
DDB_G0285537	GO:0044351	1394.85	0.713855	7.86683e-11	macropinocytosis	0	ost3
DDB_G0285545	GO:0044351	1394.85	0.713855	7.86683e-11	macropinocytosis	1	DDB_G0285545
DDB_G0285561	GO:0044351	1394.85	0.713855	7.86683e-11	macropinocytosis	0	rps15
DDB_G0285579	GO:0044351	1394.85	0.713855	7.86683e-11	macropinocytosis	1	nup107
DDB_G0285597	GO:0044351	1394.85	0.713855	7.86683e-11	macropinocytosis	1	rps28
DDB_G0285599	GO:0044351	1394.85	0.713855	7.86683e-11	macropinocytosis	1	mcfB
DDB_G0285603	GO:0044351	1394.85	0.713855	7.86683e-11	macropinocytosis	1	DDB_G0285603
DDB_G0285619	GO:0044351	1394.85	0.713855	7.86683e-11	macropinocytosis	1	DDB_G0285619
DDB_G0285621	GO:0044351	1394.85	0.713855	7.86683e-11	macropinocytosis	0	DDB_G0285621
DDB_G0285649	GO:0044351	1394.85	0.713855	7.86683e-11	macropinocytosis	0	DDB_G0285649
DDB_G0285657	GO:0044351	1394.85	0.713855	7.86683e-11	macropinocytosis	0	DDB_G0285657
DDB_G0285677	GO:0044351	1394.85	0.713855	7.86683e-11	macropinocytosis	1	NA
DDB_G0285679	GO:0044351	1394.85	0.713855	7.86683e-11	macropinocytosis	0	nol5a
DDB_G0285683	GO:0044351	1394.85	0.713855	7.86683e-11	macropinocytosis	0	eif3I
DDB_G0285705	GO:0044351	1394.85	0.713855	7.86683e-11	macropinocytosis	1	DDB_G0285705
DDB_G0285709	GO:0044351	1394.85	0.713855	7.86683e-11	macropinocytosis	0	DDB_G0285709
DDB_G0285741	GO:0044351	1394.85	0.713855	7.86683e-11	macropinocytosis	1	prdx5
DDB_G0285761	GO:0044351	1394.85	0.713855	7.86683e-11	macropinocytosis	1	DDB_G0285761
DDB_G0285783	GO:0044351	1394.85	0.713855	7.86683e-11	macropinocytosis	0	ndufa12
DDB_G0285793	GO:0044351	1394.85	0.713855	7.86683e-11	macropinocytosis	0	cadA
DDB_G0285813	GO:0044351	1394.85	0.713855	7.86683e-11	macropinocytosis	0	DDB_G0285813
DDB_G0285821	GO:0044351	1394.85	0.713855	7.86683e-11	macropinocytosis	0	srp68
DDB_G0285823	GO:0044351	1394.85	0.713855	7.86683e-11	macropinocytosis	1	DDB_G0285823
DDB_G0285827	GO:0044351	1394.85	0.713855	7.86683e-11	macropinocytosis	1	DDB_G0285827
DDB_G0285851	GO:0044351	1394.85	0.713855	7.86683e-11	macropinocytosis	1	DDB_G0285851
DDB_G0285855	GO:0044351	1394.85	0.713855	7.86683e-11	macropinocytosis	0	dlcC
DDB_G0285877	GO:0044351	1394.85	0.713855	7.86683e-11	macropinocytosis	0	nadsyn1
DDB_G0285881	GO:0044351	1394.85	0.713855	7.86683e-11	macropinocytosis	1	rpl18a
DDB_G0285887	GO:0044351	1394.85	0.713855	7.86683e-11	macropinocytosis	1	DDB_G0285887
DDB_G0285901	GO:0044351	1394.85	0.713855	7.86683e-11	macropinocytosis	1	DDB_G0285901
DDB_G0285903	GO:0044351	1394.85	0.713855	7.86683e-11	macropinocytosis	1	DDB_G0285903
DDB_G0285931	GO:0044351	1394.85	0.713855	7.86683e-11	macropinocytosis	1	dlpB
DDB_G0285955	GO:0044351	1394.85	0.713855	7.86683e-11	macropinocytosis	1	DDB_G0285955
DDB_G0285999	GO:0044351	1394.85	0.713855	7.86683e-11	macropinocytosis	1	cnbB
DDB_G0286003	GO:0044351	1394.85	0.713855	7.86683e-11	macropinocytosis	1	DDB_G0286003
DDB_G0286033	GO:0044351	1394.85	0.713855	7.86683e-11	macropinocytosis	1	pex5
DDB_G0286057	GO:0044351	1394.85	0.713855	7.86683e-11	macropinocytosis	0	adk
DDB_G0286059	GO:0044351	1394.85	0.713855	7.86683e-11	macropinocytosis	0	asns
DDB_G0286063	GO:0044351	1394.85	0.713855	7.86683e-11	macropinocytosis	0	DDB_G0286063
DDB_G0286075	GO:0044351	1394.85	0.713855	7.86683e-11	macropinocytosis	0	rps5
DDB_G0286077	GO:0044351	1394.85	0.713855	7.86683e-11	macropinocytosis	0	NA
DDB_G0286079	GO:0044351	1394.85	0.713855	7.86683e-11	macropinocytosis	1	DDB_G0286079
DDB_G0286111	GO:0044351	1394.85	0.713855	7.86683e-11	macropinocytosis	1	pigW
DDB_G0286117	GO:0044351	1394.85	0.713855	7.86683e-11	macropinocytosis	1	rps10
DDB_G0286131	GO:0044351	1394.85	0.713855	7.86683e-11	macropinocytosis	0	sec63
DDB_G0286141	GO:0044351	1394.85	0.713855	7.86683e-11	macropinocytosis	1	DDB_G0286141
DDB_G0286149	GO:0044351	1394.85	0.713855	7.86683e-11	macropinocytosis	1	dnpep
DDB_G0286167	GO:0044351	1394.85	0.713855	7.86683e-11	macropinocytosis	1	DDB_G0286167
DDB_G0286171	GO:0044351	1394.85	0.713855	7.86683e-11	macropinocytosis	0	uqcrb
DDB_G0286181	GO:0044351	1394.85	0.713855	7.86683e-11	macropinocytosis	0	romo1
DDB_G0286183	GO:0044351	1394.85	0.713855	7.86683e-11	macropinocytosis	1	agps
DDB_G0286185	GO:0044351	1394.85	0.713855	7.86683e-11	macropinocytosis	0	gpaE
DDB_G0286187	GO:0044351	1394.85	0.713855	7.86683e-11	macropinocytosis	0	proB
DDB_G0286197	GO:0044351	1394.85	0.713855	7.86683e-11	macropinocytosis	1	DDB_G0286197
DDB_G0286219	GO:0044351	1394.85	0.713855	7.86683e-11	macropinocytosis	1	DDB_G0286219
DDB_G0286231	GO:0044351	1394.85	0.713855	7.86683e-11	macropinocytosis	1	DDB_G0286231
DDB_G0286251	GO:0044351	1394.85	0.713855	7.86683e-11	macropinocytosis	1	dnajc3
DDB_G0286257	GO:0044351	1394.85	0.713855	7.86683e-11	macropinocytosis	1	argC
DDB_G0286269	GO:0044351	1394.85	0.713855	7.86683e-11	macropinocytosis	1	DDB_G0286269
DDB_G0286293	GO:0044351	1394.85	0.713855	7.86683e-11	macropinocytosis	1	dnajc13
DDB_G0286299	GO:0044351	1394.85	0.713855	7.86683e-11	macropinocytosis	0	DDB_G0286299
DDB_G0286305	GO:0044351	1394.85	0.713855	7.86683e-11	macropinocytosis	1	DDB_G0286305
DDB_G0286307	GO:0044351	1394.85	0.713855	7.86683e-11	macropinocytosis	0	DDB_G0286307
DDB_G0286335	GO:0044351	1394.85	0.713855	7.86683e-11	macropinocytosis	1	bkdA
DDB_G0286341	GO:0044351	1394.85	0.713855	7.86683e-11	macropinocytosis	0	DDB_G0286341
DDB_G0286355	GO:0044351	1394.85	0.713855	7.86683e-11	macropinocytosis	1	mhcA
DDB_G0286357	GO:0044351	1394.85	0.713855	7.86683e-11	macropinocytosis	0	rcbA
DDB_G0286389	GO:0044351	1394.85	0.713855	7.86683e-11	macropinocytosis	0	rpl34
DDB_G0286421	GO:0044351	1394.85	0.713855	7.86683e-11	macropinocytosis	1	DDB_G0286421
DDB_G0286427	GO:0044351	1394.85	0.713855	7.86683e-11	macropinocytosis	1	uox
DDB_G0286429	GO:0044351	1394.85	0.713855	7.86683e-11	macropinocytosis	1	DDB_G0286429
DDB_G0286445	GO:0044351	1394.85	0.713855	7.86683e-11	macropinocytosis	1	NA
DDB_G0286463	GO:0044351	1394.85	0.713855	7.86683e-11	macropinocytosis	0	DDB_G0286463
DDB_G0286501	GO:0044351	1394.85	0.713855	7.86683e-11	macropinocytosis	0	rplP0
DDB_G0286509	GO:0044351	1394.85	0.713855	7.86683e-11	macropinocytosis	0	H2Bv3
DDB_G0286519	GO:0044351	1394.85	0.713855	7.86683e-11	macropinocytosis	0	dgtB
DDB_G0286535	GO:0044351	1394.85	0.713855	7.86683e-11	macropinocytosis	0	gghA
DDB_G0286541	GO:0044351	1394.85	0.713855	7.86683e-11	macropinocytosis	0	timm23
DDB_G0286553	GO:0044351	1394.85	0.713855	7.86683e-11	macropinocytosis	0	rab21
DDB_G0286575	GO:0044351	1394.85	0.713855	7.86683e-11	macropinocytosis	0	NA
DDB_G0286581	GO:0044351	1394.85	0.713855	7.86683e-11	macropinocytosis	0	DDB_G0286581
DDB_G0286603	GO:0044351	1394.85	0.713855	7.86683e-11	macropinocytosis	0	DDB_G0286603
DDB_G0286619	GO:0044351	1394.85	0.713855	7.86683e-11	macropinocytosis	0	DDB_G0286619
DDB_G0286629	GO:0044351	1394.85	0.713855	7.86683e-11	macropinocytosis	0	NA
DDB_G0286651	GO:0044351	1394.85	0.713855	7.86683e-11	macropinocytosis	1	aplB
DDB_G0286669	GO:0044351	1394.85	0.713855	7.86683e-11	macropinocytosis	1	DDB_G0286669
DDB_G0286677	GO:0044351	1394.85	0.713855	7.86683e-11	macropinocytosis	0	DDB_G0286677
DDB_G0286681	GO:0044351	1394.85	0.713855	7.86683e-11	macropinocytosis	1	NA
DDB_G0286691	GO:0044351	1394.85	0.713855	7.86683e-11	macropinocytosis	1	DDB_G0286691
DDB_G0286693	GO:0044351	1394.85	0.713855	7.86683e-11	macropinocytosis	1	adcD
DDB_G0286699	GO:0044351	1394.85	0.713855	7.86683e-11	macropinocytosis	1	DDB_G0286699
DDB_G0286721	GO:0044351	1394.85	0.713855	7.86683e-11	macropinocytosis	1	ponC3
DDB_G0286723	GO:0044351	1394.85	0.713855	7.86683e-11	macropinocytosis	0	ponC5
DDB_G0286725	GO:0044351	1394.85	0.713855	7.86683e-11	macropinocytosis	1	vps13A
DDB_G0286747	GO:0044351	1394.85	0.713855	7.86683e-11	macropinocytosis	0	H2AZ
DDB_G0286759	GO:0044351	1394.85	0.713855	7.86683e-11	macropinocytosis	1	DDB_G0286759
DDB_G0286803	GO:0044351	1394.85	0.713855	7.86683e-11	macropinocytosis	0	vps41
DDB_G0286885	GO:0044351	1394.85	0.713855	7.86683e-11	macropinocytosis	1	DDB_G0286885
DDB_G0286953	GO:0044351	1394.85	0.713855	7.86683e-11	macropinocytosis	1	uduG
DDB_G0286973	GO:0044351	1394.85	0.713855	7.86683e-11	macropinocytosis	1	DDB_G0286973
DDB_G0286983	GO:0044351	1394.85	0.713855	7.86683e-11	macropinocytosis	1	DDB_G0286983
DDB_G0286985	GO:0044351	1394.85	0.713855	7.86683e-11	macropinocytosis	0	zipA
DDB_G0287005	GO:0044351	1394.85	0.713855	7.86683e-11	macropinocytosis	1	DDB_G0287005
DDB_G0287013	GO:0044351	1394.85	0.713855	7.86683e-11	macropinocytosis	1	DDB_G0287013
DDB_G0287017	GO:0044351	1394.85	0.713855	7.86683e-11	macropinocytosis	1	DDB_G0287017
DDB_G0287021	GO:0044351	1394.85	0.713855	7.86683e-11	macropinocytosis	1	vps20
DDB_G0287033	GO:0044351	1394.85	0.713855	7.86683e-11	macropinocytosis	1	nagA
DDB_G0287035	GO:0044351	1394.85	0.713855	7.86683e-11	macropinocytosis	1	lmpB
DDB_G0287067	GO:0044351	1394.85	0.713855	7.86683e-11	macropinocytosis	0	NA
DDB_G0287125	GO:0044351	1394.85	0.713855	7.86683e-11	macropinocytosis	1	proA
DDB_G0287127	GO:0044351	1394.85	0.713855	7.86683e-11	macropinocytosis	0	vatA
DDB_G0287159	GO:0044351	1394.85	0.713855	7.86683e-11	macropinocytosis	0	cysS
DDB_G0287189	GO:0044351	1394.85	0.713855	7.86683e-11	macropinocytosis	0	DDB_G0287189
DDB_G0287195	GO:0044351	1394.85	0.713855	7.86683e-11	macropinocytosis	1	DDB_G0287195
DDB_G0287201	GO:0044351	1394.85	0.713855	7.86683e-11	macropinocytosis	1	DDB_G0287201
DDB_G0287211	GO:0044351	1394.85	0.713855	7.86683e-11	macropinocytosis	1	rab11B
DDB_G0287219	GO:0044351	1394.85	0.713855	7.86683e-11	macropinocytosis	1	DDB_G0287219
DDB_G0287227	GO:0044351	1394.85	0.713855	7.86683e-11	macropinocytosis	0	trxE
DDB_G0287229	GO:0044351	1394.85	0.713855	7.86683e-11	macropinocytosis	1	chdh
DDB_G0287239	GO:0044351	1394.85	0.713855	7.86683e-11	macropinocytosis	1	DDB_G0287239
DDB_G0287255	GO:0044351	1394.85	0.713855	7.86683e-11	macropinocytosis	1	gcvP
DDB_G0287257	GO:0044351	1394.85	0.713855	7.86683e-11	macropinocytosis	1	DDB_G0287257
DDB_G0287271	GO:0044351	1394.85	0.713855	7.86683e-11	macropinocytosis	1	gol
DDB_G0287273	GO:0044351	1394.85	0.713855	7.86683e-11	macropinocytosis	0	wdr5
DDB_G0287291	GO:0044351	1394.85	0.713855	7.86683e-11	macropinocytosis	1	abpD
DDB_G0287297	GO:0044351	1394.85	0.713855	7.86683e-11	macropinocytosis	0	p80
DDB_G0287305	GO:0044351	1394.85	0.713855	7.86683e-11	macropinocytosis	0	DDB_G0287305
DDB_G0287309	GO:0044351	1394.85	0.713855	7.86683e-11	macropinocytosis	0	DDB_G0287309
DDB_G0287333	GO:0044351	1394.85	0.713855	7.86683e-11	macropinocytosis	0	eif3J
DDB_G0287335	GO:0044351	1394.85	0.713855	7.86683e-11	macropinocytosis	1	DDB_G0287335
DDB_G0287377	GO:0044351	1394.85	0.713855	7.86683e-11	macropinocytosis	1	mccA
DDB_G0287391	GO:0044351	1394.85	0.713855	7.86683e-11	macropinocytosis	0	ranbp1
DDB_G0287399	GO:0044351	1394.85	0.713855	7.86683e-11	macropinocytosis	1	DDB_G0287399
DDB_G0287403	GO:0044351	1394.85	0.713855	7.86683e-11	macropinocytosis	0	DDB_G0287403
DDB_G0287405	GO:0044351	1394.85	0.713855	7.86683e-11	macropinocytosis	0	DDB_G0287405
DDB_G0287415	GO:0044351	1394.85	0.713855	7.86683e-11	macropinocytosis	1	NA
DDB_G0287439	GO:0044351	1394.85	0.713855	7.86683e-11	macropinocytosis	1	DDB_G0287439
DDB_G0287445	GO:0044351	1394.85	0.713855	7.86683e-11	macropinocytosis	1	DDB_G0287445
DDB_G0287461	GO:0044351	1394.85	0.713855	7.86683e-11	macropinocytosis	1	abcG3
DDB_G0287467	GO:0044351	1394.85	0.713855	7.86683e-11	macropinocytosis	0	gluS
DDB_G0287469	GO:0044351	1394.85	0.713855	7.86683e-11	macropinocytosis	1	glud1
DDB_G0287491	GO:0044351	1394.85	0.713855	7.86683e-11	macropinocytosis	1	DDB_G0287491
DDB_G0287497	GO:0044351	1394.85	0.713855	7.86683e-11	macropinocytosis	1	nup133
DDB_G0287505	GO:0044351	1394.85	0.713855	7.86683e-11	macropinocytosis	1	talB
DDB_G0287509	GO:0044351	1394.85	0.713855	7.86683e-11	macropinocytosis	1	DDB_G0287509
DDB_G0287517	GO:0044351	1394.85	0.713855	7.86683e-11	macropinocytosis	0	NA
DDB_G0287519	GO:0044351	1394.85	0.713855	7.86683e-11	macropinocytosis	1	DDB_G0287519
DDB_G0287543	GO:0044351	1394.85	0.713855	7.86683e-11	macropinocytosis	1	DDB_G0287543
DDB_G0287585	GO:0044351	1394.85	0.713855	7.86683e-11	macropinocytosis	1	rgaA
DDB_G0287587	GO:0044351	1394.85	0.713855	7.86683e-11	macropinocytosis	1	smlA
DDB_G0287593	GO:0044351	1394.85	0.713855	7.86683e-11	macropinocytosis	1	abcC6
DDB_G0287595	GO:0044351	1394.85	0.713855	7.86683e-11	macropinocytosis	0	pgkA
DDB_G0287607	GO:0044351	1394.85	0.713855	7.86683e-11	macropinocytosis	0	pcna
DDB_G0287627	GO:0044351	1394.85	0.713855	7.86683e-11	macropinocytosis	0	timm17
DDB_G0287629	GO:0044351	1394.85	0.713855	7.86683e-11	macropinocytosis	0	rbx1
DDB_G0287631	GO:0044351	1394.85	0.713855	7.86683e-11	macropinocytosis	1	glk
DDB_G0287637	GO:0044351	1394.85	0.713855	7.86683e-11	macropinocytosis	1	mybD
DDB_G0287647	GO:0044351	1394.85	0.713855	7.86683e-11	macropinocytosis	1	DDB_G0287647
DDB_G0287649	GO:0044351	1394.85	0.713855	7.86683e-11	macropinocytosis	1	pldY
DDB_G0287661	GO:0044351	1394.85	0.713855	7.86683e-11	macropinocytosis	1	spt5
DDB_G0287663	GO:0044351	1394.85	0.713855	7.86683e-11	macropinocytosis	0	NA
DDB_G0287685	GO:0044351	1394.85	0.713855	7.86683e-11	macropinocytosis	1	cinC
DDB_G0287689	GO:0044351	1394.85	0.713855	7.86683e-11	macropinocytosis	0	tubA
DDB_G0287691	GO:0044351	1394.85	0.713855	7.86683e-11	macropinocytosis	1	abcC3
DDB_G0287707	GO:0044351	1394.85	0.713855	7.86683e-11	macropinocytosis	0	rpc11
DDB_G0287733	GO:0044351	1394.85	0.713855	7.86683e-11	macropinocytosis	0	syn7A
DDB_G0287741	GO:0044351	1394.85	0.713855	7.86683e-11	macropinocytosis	1	DDB_G0287741
DDB_G0287749	GO:0044351	1394.85	0.713855	7.86683e-11	macropinocytosis	0	NA
DDB_G0287755	GO:0044351	1394.85	0.713855	7.86683e-11	macropinocytosis	1	mad1
DDB_G0287773	GO:0044351	1394.85	0.713855	7.86683e-11	macropinocytosis	1	gcvH1
DDB_G0287777	GO:0044351	1394.85	0.713855	7.86683e-11	macropinocytosis	0	sec61g
DDB_G0287793	GO:0044351	1394.85	0.713855	7.86683e-11	macropinocytosis	1	DDB_G0287793
DDB_G0287801	GO:0044351	1394.85	0.713855	7.86683e-11	macropinocytosis	0	ncstn
DDB_G0287803	GO:0044351	1394.85	0.713855	7.86683e-11	macropinocytosis	1	argS2
DDB_G0287811	GO:0044351	1394.85	0.713855	7.86683e-11	macropinocytosis	0	DDB_G0287811
DDB_G0287817	GO:0044351	1394.85	0.713855	7.86683e-11	macropinocytosis	1	wdr24
DDB_G0287825	GO:0044351	1394.85	0.713855	7.86683e-11	macropinocytosis	1	DDB_G0287825
DDB_G0287827	GO:0044351	1394.85	0.713855	7.86683e-11	macropinocytosis	0	pfdn1
DDB_G0287843	GO:0044351	1394.85	0.713855	7.86683e-11	macropinocytosis	1	DDB_G0287843
DDB_G0287855	GO:0044351	1394.85	0.713855	7.86683e-11	macropinocytosis	1	pirA
DDB_G0287859	GO:0044351	1394.85	0.713855	7.86683e-11	macropinocytosis	1	DDB_G0287859
DDB_G0287913	GO:0044351	1394.85	0.713855	7.86683e-11	macropinocytosis	0	oatA
DDB_G0287947	GO:0044351	1394.85	0.713855	7.86683e-11	macropinocytosis	1	DDB_G0287947
DDB_G0287965	GO:0044351	1394.85	0.713855	7.86683e-11	macropinocytosis	1	nae1
DDB_G0287989	GO:0044351	1394.85	0.713855	7.86683e-11	macropinocytosis	0	DDB_G0287989
DDB_G0287991	GO:0044351	1394.85	0.713855	7.86683e-11	macropinocytosis	0	NA
DDB_G0287995	GO:0044351	1394.85	0.713855	7.86683e-11	macropinocytosis	1	rplp1B
DDB_G0288003	GO:0044351	1394.85	0.713855	7.86683e-11	macropinocytosis	1	DDB_G0288003
DDB_G0288005	GO:0044351	1394.85	0.713855	7.86683e-11	macropinocytosis	1	DDB_G0288005
DDB_G0288019	GO:0044351	1394.85	0.713855	7.86683e-11	macropinocytosis	1	DDB_G0288019
DDB_G0288051	GO:0044351	1394.85	0.713855	7.86683e-11	macropinocytosis	0	NA
DDB_G0288053	GO:0044351	1394.85	0.713855	7.86683e-11	macropinocytosis	0	empA
DDB_G0288061	GO:0044351	1394.85	0.713855	7.86683e-11	macropinocytosis	1	p2xE
DDB_G0288065	GO:0044351	1394.85	0.713855	7.86683e-11	macropinocytosis	1	cdcD
DDB_G0288073	GO:0044351	1394.85	0.713855	7.86683e-11	macropinocytosis	1	DDB_G0288073
DDB_G0288081	GO:0044351	1394.85	0.713855	7.86683e-11	macropinocytosis	1	NA
DDB_G0288095	GO:0044351	1394.85	0.713855	7.86683e-11	macropinocytosis	0	DDB_G0288095
DDB_G0288101	GO:0044351	1394.85	0.713855	7.86683e-11	macropinocytosis	0	rpl22
DDB_G0288105	GO:0044351	1394.85	0.713855	7.86683e-11	macropinocytosis	1	oxct
DDB_G0288109	GO:0044351	1394.85	0.713855	7.86683e-11	macropinocytosis	1	DDB_G0288109
DDB_G0288127	GO:0044351	1394.85	0.713855	7.86683e-11	macropinocytosis	1	ogdh
DDB_G0288133	GO:0044351	1394.85	0.713855	7.86683e-11	macropinocytosis	0	DDB_G0288133
DDB_G0288137	GO:0044351	1394.85	0.713855	7.86683e-11	macropinocytosis	0	DDB_G0288137
DDB_G0288141	GO:0044351	1394.85	0.713855	7.86683e-11	macropinocytosis	1	DDB_G0288141
DDB_G0288145	GO:0044351	1394.85	0.713855	7.86683e-11	macropinocytosis	0	purL
DDB_G0288155	GO:0044351	1394.85	0.713855	7.86683e-11	macropinocytosis	0	NA
DDB_G0288161	GO:0044351	1394.85	0.713855	7.86683e-11	macropinocytosis	1	NA
DDB_G0288165	GO:0044351	1394.85	0.713855	7.86683e-11	macropinocytosis	1	DDB_G0288165
DDB_G0288181	GO:0044351	1394.85	0.713855	7.86683e-11	macropinocytosis	0	hspA
DDB_G0288195	GO:0044351	1394.85	0.713855	7.86683e-11	macropinocytosis	1	sibC
DDB_G0288201	GO:0044351	1394.85	0.713855	7.86683e-11	macropinocytosis	0	DDB_G0288201
DDB_G0288247	GO:0044351	1394.85	0.713855	7.86683e-11	macropinocytosis	0	aif
DDB_G0288257	GO:0044351	1394.85	0.713855	7.86683e-11	macropinocytosis	0	rpb2
DDB_G0288265	GO:0044351	1394.85	0.713855	7.86683e-11	macropinocytosis	0	DDB_G0288265
DDB_G0288267	GO:0044351	1394.85	0.713855	7.86683e-11	macropinocytosis	0	thrS1
DDB_G0288273	GO:0044351	1394.85	0.713855	7.86683e-11	macropinocytosis	0	rpl10
DDB_G0288289	GO:0044351	1394.85	0.713855	7.86683e-11	macropinocytosis	1	rliF
DDB_G0288293	GO:0044351	1394.85	0.713855	7.86683e-11	macropinocytosis	0	DDB_G0288293
DDB_G0288295	GO:0044351	1394.85	0.713855	7.86683e-11	macropinocytosis	1	rpl12
DDB_G0288299	GO:0044351	1394.85	0.713855	7.86683e-11	macropinocytosis	0	pdx1
DDB_G0288305	GO:0044351	1394.85	0.713855	7.86683e-11	macropinocytosis	1	pdx2
DDB_G0288319	GO:0044351	1394.85	0.713855	7.86683e-11	macropinocytosis	1	arcE
DDB_G0288321	GO:0044351	1394.85	0.713855	7.86683e-11	macropinocytosis	1	dgtA
DDB_G0288333	GO:0044351	1394.85	0.713855	7.86683e-11	macropinocytosis	0	purB
DDB_G0288347	GO:0044351	1394.85	0.713855	7.86683e-11	macropinocytosis	0	nola3
DDB_G0288349	GO:0044351	1394.85	0.713855	7.86683e-11	macropinocytosis	0	rpl35
DDB_G0288373	GO:0044351	1394.85	0.713855	7.86683e-11	macropinocytosis	1	efbA
DDB_G0288435	GO:0044351	1394.85	0.713855	7.86683e-11	macropinocytosis	1	DDB_G0288435
DDB_G0288439	GO:0044351	1394.85	0.713855	7.86683e-11	macropinocytosis	1	syn8B
DDB_G0288447	GO:0044351	1394.85	0.713855	7.86683e-11	macropinocytosis	0	DDB_G0288447
DDB_G0288449	GO:0044351	1394.85	0.713855	7.86683e-11	macropinocytosis	1	rpc2
DDB_G0288461	GO:0044351	1394.85	0.713855	7.86683e-11	macropinocytosis	1	hgsA
DDB_G0288481	GO:0044351	1394.85	0.713855	7.86683e-11	macropinocytosis	0	gchA
DDB_G0288511	GO:0044351	1394.85	0.713855	7.86683e-11	macropinocytosis	1	sadA
DDB_G0288519	GO:0044351	1394.85	0.713855	7.86683e-11	macropinocytosis	1	DDB_G0288519
DDB_G0288521	GO:0044351	1394.85	0.713855	7.86683e-11	macropinocytosis	1	DDB_G0288521
DDB_G0288541	GO:0044351	1394.85	0.713855	7.86683e-11	macropinocytosis	0	maoA
DDB_G0288545	GO:0044351	1394.85	0.713855	7.86683e-11	macropinocytosis	1	nup210
DDB_G0288551	GO:0044351	1394.85	0.713855	7.86683e-11	macropinocytosis	1	DDB_G0288551
DDB_G0288563	GO:0044351	1394.85	0.713855	7.86683e-11	macropinocytosis	1	DDB_G0288563
DDB_G0288569	GO:0044351	1394.85	0.713855	7.86683e-11	macropinocytosis	1	DDB_G0288569
DDB_G0288579	GO:0044351	1394.85	0.713855	7.86683e-11	macropinocytosis	0	DDB_G0288579
DDB_G0288599	GO:0044351	1394.85	0.713855	7.86683e-11	macropinocytosis	1	DDB_G0288599
DDB_G0288615	GO:0044351	1394.85	0.713855	7.86683e-11	macropinocytosis	1	NA
DDB_G0288617	GO:0044351	1394.85	0.713855	7.86683e-11	macropinocytosis	1	shkB
DDB_G0288621	GO:0044351	1394.85	0.713855	7.86683e-11	macropinocytosis	1	psmD3
DDB_G0288629	GO:0044351	1394.85	0.713855	7.86683e-11	macropinocytosis	1	NA
DDB_G0288635	GO:0044351	1394.85	0.713855	7.86683e-11	macropinocytosis	0	DDB_G0288635
DDB_G0288641	GO:0044351	1394.85	0.713855	7.86683e-11	macropinocytosis	1	DDB_G0288641
DDB_G0288677	GO:0044351	1394.85	0.713855	7.86683e-11	macropinocytosis	0	cdk5
DDB_G0288679	GO:0044351	1394.85	0.713855	7.86683e-11	macropinocytosis	1	myoE
DDB_G0288697	GO:0044351	1394.85	0.713855	7.86683e-11	macropinocytosis	1	DDB_G0288697
DDB_G0288701	GO:0044351	1394.85	0.713855	7.86683e-11	macropinocytosis	1	ragA
DDB_G0288717	GO:0044351	1394.85	0.713855	7.86683e-11	macropinocytosis	0	DDB_G0288717
DDB_G0288719	GO:0044351	1394.85	0.713855	7.86683e-11	macropinocytosis	1	scfd1
DDB_G0288735	GO:0044351	1394.85	0.713855	7.86683e-11	macropinocytosis	0	DDB_G0288735
DDB_G0288759	GO:0044351	1394.85	0.713855	7.86683e-11	macropinocytosis	0	tmem14A
DDB_G0288769	GO:0044351	1394.85	0.713855	7.86683e-11	macropinocytosis	1	cap
DDB_G0288777	GO:0044351	1394.85	0.713855	7.86683e-11	macropinocytosis	1	mppB
DDB_G0288783	GO:0044351	1394.85	0.713855	7.86683e-11	macropinocytosis	1	mybG
DDB_G0288785	GO:0044351	1394.85	0.713855	7.86683e-11	macropinocytosis	1	cbpL
DDB_G0288787	GO:0044351	1394.85	0.713855	7.86683e-11	macropinocytosis	0	vps29
DDB_G0288799	GO:0044351	1394.85	0.713855	7.86683e-11	macropinocytosis	1	mrpl21
DDB_G0288807	GO:0044351	1394.85	0.713855	7.86683e-11	macropinocytosis	1	ppt2
DDB_G0288821	GO:0044351	1394.85	0.713855	7.86683e-11	macropinocytosis	1	DDB_G0288821
DDB_G0288831	GO:0044351	1394.85	0.713855	7.86683e-11	macropinocytosis	0	cox17
DDB_G0288875	GO:0044351	1394.85	0.713855	7.86683e-11	macropinocytosis	0	ndufv1
DDB_G0288879	GO:0044351	1394.85	0.713855	7.86683e-11	macropinocytosis	0	act11
DDB_G0288907	GO:0044351	1394.85	0.713855	7.86683e-11	macropinocytosis	0	smtA
DDB_G0288917	GO:0044351	1394.85	0.713855	7.86683e-11	macropinocytosis	1	DDB_G0288917
DDB_G0288925	GO:0044351	1394.85	0.713855	7.86683e-11	macropinocytosis	0	NA
DDB_G0288941	GO:0044351	1394.85	0.713855	7.86683e-11	macropinocytosis	0	DDB_G0288941
DDB_G0288947	GO:0044351	1394.85	0.713855	7.86683e-11	macropinocytosis	1	DDB_G0288947
DDB_G0288983	GO:0044351	1394.85	0.713855	7.86683e-11	macropinocytosis	0	mrpl3
DDB_G0288987	GO:0044351	1394.85	0.713855	7.86683e-11	macropinocytosis	1	DDB_G0288987
DDB_G0288989	GO:0044351	1394.85	0.713855	7.86683e-11	macropinocytosis	1	nipsnap
DDB_G0289003	GO:0044351	1394.85	0.713855	7.86683e-11	macropinocytosis	0	psmC4
DDB_G0289005	GO:0044351	1394.85	0.713855	7.86683e-11	macropinocytosis	1	act4
DDB_G0289011	GO:0044351	1394.85	0.713855	7.86683e-11	macropinocytosis	0	DDB_G0289011
DDB_G0289025	GO:0044351	1394.85	0.713855	7.86683e-11	macropinocytosis	0	rps7
DDB_G0289027	GO:0044351	1394.85	0.713855	7.86683e-11	macropinocytosis	0	DDB_G0289027
DDB_G0289053	GO:0044351	1394.85	0.713855	7.86683e-11	macropinocytosis	1	DDB_G0289053
DDB_G0289059	GO:0044351	1394.85	0.713855	7.86683e-11	macropinocytosis	0	DDB_G0289059
DDB_G0289063	GO:0044351	1394.85	0.713855	7.86683e-11	macropinocytosis	1	DDB_G0289063
DDB_G0289081	GO:0044351	1394.85	0.713855	7.86683e-11	macropinocytosis	1	fatA
DDB_G0289085	GO:0044351	1394.85	0.713855	7.86683e-11	macropinocytosis	0	mmsdh
DDB_G0289127	GO:0044351	1394.85	0.713855	7.86683e-11	macropinocytosis	1	DDB_G0289127
DDB_G0289141	GO:0044351	1394.85	0.713855	7.86683e-11	macropinocytosis	1	DDB_G0289141
DDB_G0289157	GO:0044351	1394.85	0.713855	7.86683e-11	macropinocytosis	1	cmfB
DDB_G0289171	GO:0044351	1394.85	0.713855	7.86683e-11	macropinocytosis	0	DDB_G0289171
DDB_G0289173	GO:0044351	1394.85	0.713855	7.86683e-11	macropinocytosis	0	arfA
DDB_G0289199	GO:0044351	1394.85	0.713855	7.86683e-11	macropinocytosis	1	DDB_G0289199
DDB_G0289201	GO:0044351	1394.85	0.713855	7.86683e-11	macropinocytosis	1	mfsd1
DDB_G0289231	GO:0044351	1394.85	0.713855	7.86683e-11	macropinocytosis	1	DDB_G0289231
DDB_G0289233	GO:0044351	1394.85	0.713855	7.86683e-11	macropinocytosis	1	DDB_G0289233
DDB_G0289247	GO:0044351	1394.85	0.713855	7.86683e-11	macropinocytosis	0	apm1
DDB_G0289265	GO:0044351	1394.85	0.713855	7.86683e-11	macropinocytosis	1	DDB_G0289265
DDB_G0289269	GO:0044351	1394.85	0.713855	7.86683e-11	macropinocytosis	1	DDB_G0289269
DDB_G0289285	GO:0044351	1394.85	0.713855	7.86683e-11	macropinocytosis	0	NA
DDB_G0289317	GO:0044351	1394.85	0.713855	7.86683e-11	macropinocytosis	0	drg1
DDB_G0289325	GO:0044351	1394.85	0.713855	7.86683e-11	macropinocytosis	1	scsA
DDB_G0289327	GO:0044351	1394.85	0.713855	7.86683e-11	macropinocytosis	0	sevA
DDB_G0289345	GO:0044351	1394.85	0.713855	7.86683e-11	macropinocytosis	0	NA
DDB_G0289357	GO:0044351	1394.85	0.713855	7.86683e-11	macropinocytosis	0	DDB_G0289357
DDB_G0289371	GO:0044351	1394.85	0.713855	7.86683e-11	macropinocytosis	0	copG
DDB_G0289379	GO:0044351	1394.85	0.713855	7.86683e-11	macropinocytosis	0	syn1A
DDB_G0289391	GO:0044351	1394.85	0.713855	7.86683e-11	macropinocytosis	0	pkiA
DDB_G0289429	GO:0044351	1394.85	0.713855	7.86683e-11	macropinocytosis	0	lmnB
DDB_G0289439	GO:0044351	1394.85	0.713855	7.86683e-11	macropinocytosis	0	DDB_G0289439
DDB_G0289451	GO:0044351	1394.85	0.713855	7.86683e-11	macropinocytosis	0	tmem167
DDB_G0289469	GO:0044351	1394.85	0.713855	7.86683e-11	macropinocytosis	1	DDB_G0289469
DDB_G0289479	GO:0044351	1394.85	0.713855	7.86683e-11	macropinocytosis	1	swp1
DDB_G0289483	GO:0044351	1394.85	0.713855	7.86683e-11	macropinocytosis	0	ctxA
DDB_G0289485	GO:0044351	1394.85	0.713855	7.86683e-11	macropinocytosis	0	vacA
DDB_G0289513	GO:0044351	1394.85	0.713855	7.86683e-11	macropinocytosis	0	rfa1
DDB_G0289523	GO:0044351	1394.85	0.713855	7.86683e-11	macropinocytosis	0	copZa
DDB_G0289541	GO:0044351	1394.85	0.713855	7.86683e-11	macropinocytosis	0	vasP
DDB_G0289553	GO:0044351	1394.85	0.713855	7.86683e-11	macropinocytosis	1	act1
DDB_G0289563	GO:0044351	1394.85	0.713855	7.86683e-11	macropinocytosis	1	mlcC
DDB_G0289593	GO:0044351	1394.85	0.713855	7.86683e-11	macropinocytosis	1	tufM
DDB_G0289599	GO:0044351	1394.85	0.713855	7.86683e-11	macropinocytosis	1	comA
DDB_G0289609	GO:0044351	1394.85	0.713855	7.86683e-11	macropinocytosis	1	DDB_G0289609
DDB_G0289621	GO:0044351	1394.85	0.713855	7.86683e-11	macropinocytosis	0	DDB_G0289621
DDB_G0289623	GO:0044351	1394.85	0.713855	7.86683e-11	macropinocytosis	0	pex11
DDB_G0289663	GO:0044351	1394.85	0.713855	7.86683e-11	macropinocytosis	0	act5
DDB_G0289671	GO:0044351	1394.85	0.713855	7.86683e-11	macropinocytosis	1	DDB_G0289671
DDB_G0289679	GO:0044351	1394.85	0.713855	7.86683e-11	macropinocytosis	1	NA
DDB_G0289699	GO:0044351	1394.85	0.713855	7.86683e-11	macropinocytosis	0	nola2
DDB_G0289701	GO:0044351	1394.85	0.713855	7.86683e-11	macropinocytosis	0	DDB_G0289701
DDB_G0289707	GO:0044351	1394.85	0.713855	7.86683e-11	macropinocytosis	0	DDB_G0289707
DDB_G0289715	GO:0044351	1394.85	0.713855	7.86683e-11	macropinocytosis	0	DDB_G0289715
DDB_G0289749	GO:0044351	1394.85	0.713855	7.86683e-11	macropinocytosis	0	DDB_G0289749
DDB_G0289755	GO:0044351	1394.85	0.713855	7.86683e-11	macropinocytosis	1	NA
DDB_G0289773	GO:0044351	1394.85	0.713855	7.86683e-11	macropinocytosis	1	NA
DDB_G0289791	GO:0044351	1394.85	0.713855	7.86683e-11	macropinocytosis	1	drkA
DDB_G0289823	GO:0044351	1394.85	0.713855	7.86683e-11	macropinocytosis	1	omt9
DDB_G0289827	GO:0044351	1394.85	0.713855	7.86683e-11	macropinocytosis	0	rab18
DDB_G0289833	GO:0044351	1394.85	0.713855	7.86683e-11	macropinocytosis	1	DDB_G0289833
DDB_G0289875	GO:0044351	1394.85	0.713855	7.86683e-11	macropinocytosis	1	uppA
DDB_G0289877	GO:0044351	1394.85	0.713855	7.86683e-11	macropinocytosis	0	rps9
DDB_G0289881	GO:0044351	1394.85	0.713855	7.86683e-11	macropinocytosis	0	atg5
DDB_G0289923	GO:0044351	1394.85	0.713855	7.86683e-11	macropinocytosis	0	agxt
DDB_G0289935	GO:0044351	1394.85	0.713855	7.86683e-11	macropinocytosis	1	gtf3C5
DDB_G0289945	GO:0044351	1394.85	0.713855	7.86683e-11	macropinocytosis	0	DDB_G0289945
DDB_G0289947	GO:0044351	1394.85	0.713855	7.86683e-11	macropinocytosis	0	DDB_G0289947
DDB_G0289991	GO:0044351	1394.85	0.713855	7.86683e-11	macropinocytosis	0	NA
DDB_G0289993	GO:0044351	1394.85	0.713855	7.86683e-11	macropinocytosis	1	DDB_G0289993
DDB_G0290015	GO:0044351	1394.85	0.713855	7.86683e-11	macropinocytosis	1	grxA
DDB_G0290017	GO:0044351	1394.85	0.713855	7.86683e-11	macropinocytosis	0	DDB_G0290017
DDB_G0290027	GO:0044351	1394.85	0.713855	7.86683e-11	macropinocytosis	0	DDB_G0290027
DDB_G0290069	GO:0044351	1394.85	0.713855	7.86683e-11	macropinocytosis	1	pitA
DDB_G0290081	GO:0044351	1394.85	0.713855	7.86683e-11	macropinocytosis	0	sort1
DDB_G0290091	GO:0044351	1394.85	0.713855	7.86683e-11	macropinocytosis	1	rpl22a
DDB_G0290121	GO:0044351	1394.85	0.713855	7.86683e-11	macropinocytosis	0	purD
DDB_G0290123	GO:0044351	1394.85	0.713855	7.86683e-11	macropinocytosis	0	phbA
DDB_G0290139	GO:0044351	1394.85	0.713855	7.86683e-11	macropinocytosis	1	DDB_G0290139
DDB_G0290141	GO:0044351	1394.85	0.713855	7.86683e-11	macropinocytosis	0	rps17
DDB_G0290157	GO:0044351	1394.85	0.713855	7.86683e-11	macropinocytosis	0	pkgB
DDB_G0290177	GO:0044351	1394.85	0.713855	7.86683e-11	macropinocytosis	0	DDB_G0290177
DDB_G0290187	GO:0044351	1394.85	0.713855	7.86683e-11	macropinocytosis	0	hspH
DDB_G0290197	GO:0044351	1394.85	0.713855	7.86683e-11	macropinocytosis	0	DDB_G0290197
DDB_G0290205	GO:0044351	1394.85	0.713855	7.86683e-11	macropinocytosis	1	DDB_G0290205
DDB_G0290207	GO:0044351	1394.85	0.713855	7.86683e-11	macropinocytosis	1	mdhA
DDB_G0290213	GO:0044351	1394.85	0.713855	7.86683e-11	macropinocytosis	1	vps45
DDB_G0290217	GO:0044351	1394.85	0.713855	7.86683e-11	macropinocytosis	1	glb1
DDB_G0290223	GO:0044351	1394.85	0.713855	7.86683e-11	macropinocytosis	1	DDB_G0290223
DDB_G0290257	GO:0044351	1394.85	0.713855	7.86683e-11	macropinocytosis	1	cfrA
DDB_G0290261	GO:0044351	1394.85	0.713855	7.86683e-11	macropinocytosis	1	cfrC
DDB_G0290311	GO:0044351	1394.85	0.713855	7.86683e-11	macropinocytosis	0	DDB_G0290311
DDB_G0290315	GO:0044351	1394.85	0.713855	7.86683e-11	macropinocytosis	1	rpl23
DDB_G0290325	GO:0044351	1394.85	0.713855	7.86683e-11	macropinocytosis	1	espl1
DDB_G0290331	GO:0044351	1394.85	0.713855	7.86683e-11	macropinocytosis	1	ssrp1
DDB_G0290333	GO:0044351	1394.85	0.713855	7.86683e-11	macropinocytosis	0	tpp1B
DDB_G0290339	GO:0044351	1394.85	0.713855	7.86683e-11	macropinocytosis	1	ugt1
DDB_G0290363	GO:0044351	1394.85	0.713855	7.86683e-11	macropinocytosis	1	sybB
DDB_G0290369	GO:0044351	1394.85	0.713855	7.86683e-11	macropinocytosis	1	DDB_G0290369
DDB_G0290371	GO:0044351	1394.85	0.713855	7.86683e-11	macropinocytosis	1	DDB_G0290371
DDB_G0290387	GO:0044351	1394.85	0.713855	7.86683e-11	macropinocytosis	1	DDB_G0290387
DDB_G0290391	GO:0044351	1394.85	0.713855	7.86683e-11	macropinocytosis	1	NA
DDB_G0290395	GO:0044351	1394.85	0.713855	7.86683e-11	macropinocytosis	0	NA
DDB_G0290397	GO:0044351	1394.85	0.713855	7.86683e-11	macropinocytosis	1	fthS
DDB_G0290409	GO:0044351	1394.85	0.713855	7.86683e-11	macropinocytosis	1	DDB_G0290409
DDB_G0290411	GO:0044351	1394.85	0.713855	7.86683e-11	macropinocytosis	1	NA
DDB_G0290417	GO:0044351	1394.85	0.713855	7.86683e-11	macropinocytosis	1	chid1
DDB_G0290427	GO:0044351	1394.85	0.713855	7.86683e-11	macropinocytosis	1	DDB_G0290427
DDB_G0290433	GO:0044351	1394.85	0.713855	7.86683e-11	macropinocytosis	1	DDB_G0290433
DDB_G0290457	GO:0044351	1394.85	0.713855	7.86683e-11	macropinocytosis	0	DDB_G0290457
DDB_G0290459	GO:0044351	1394.85	0.713855	7.86683e-11	macropinocytosis	1	DDB_G0290459
DDB_G0290479	GO:0044351	1394.85	0.713855	7.86683e-11	macropinocytosis	1	hydA
DDB_G0290495	GO:0044351	1394.85	0.713855	7.86683e-11	macropinocytosis	0	DDB_G0290495
DDB_G0290523	GO:0044351	1394.85	0.713855	7.86683e-11	macropinocytosis	0	DDB_G0290523
DDB_G0290535	GO:0044351	1394.85	0.713855	7.86683e-11	macropinocytosis	1	DDB_G0290535
DDB_G0290537	GO:0044351	1394.85	0.713855	7.86683e-11	macropinocytosis	1	DDB_G0290537
DDB_G0290547	GO:0044351	1394.85	0.713855	7.86683e-11	macropinocytosis	0	DDB_G0290547
DDB_G0290575	GO:0044351	1394.85	0.713855	7.86683e-11	macropinocytosis	1	DDB_G0290575
DDB_G0290577	GO:0044351	1394.85	0.713855	7.86683e-11	macropinocytosis	1	dnase2
DDB_G0290591	GO:0044351	1394.85	0.713855	7.86683e-11	macropinocytosis	1	DDB_G0290591
DDB_G0290593	GO:0044351	1394.85	0.713855	7.86683e-11	macropinocytosis	0	DDB_G0290593
DDB_G0290597	GO:0044351	1394.85	0.713855	7.86683e-11	macropinocytosis	1	DDB_G0290597
DDB_G0290603	GO:0044351	1394.85	0.713855	7.86683e-11	macropinocytosis	1	NA
DDB_G0290649	GO:0044351	1394.85	0.713855	7.86683e-11	macropinocytosis	1	DDB_G0290649
DDB_G0290655	GO:0044351	1394.85	0.713855	7.86683e-11	macropinocytosis	0	NA
DDB_G0290659	GO:0044351	1394.85	0.713855	7.86683e-11	macropinocytosis	1	sdrA
DDB_G0290725	GO:0044351	1394.85	0.713855	7.86683e-11	macropinocytosis	0	lyrm4
DDB_G0290783	GO:0044351	1394.85	0.713855	7.86683e-11	macropinocytosis	1	rabG2
DDB_G0290801	GO:0044351	1394.85	0.713855	7.86683e-11	macropinocytosis	0	DDB_G0290801
DDB_G0290829	GO:0044351	1394.85	0.713855	7.86683e-11	macropinocytosis	1	rabM
DDB_G0290849	GO:0044351	1394.85	0.713855	7.86683e-11	macropinocytosis	1	zmpste24
DDB_G0290851	GO:0044351	1394.85	0.713855	7.86683e-11	macropinocytosis	0	spc3
DDB_G0290857	GO:0044351	1394.85	0.713855	7.86683e-11	macropinocytosis	1	DDB_G0290857
DDB_G0290909	GO:0044351	1394.85	0.713855	7.86683e-11	macropinocytosis	0	rpa49
DDB_G0290911	GO:0044351	1394.85	0.713855	7.86683e-11	macropinocytosis	0	DDB_G0290911
DDB_G0290913	GO:0044351	1394.85	0.713855	7.86683e-11	macropinocytosis	1	mcfS
DDB_G0290919	GO:0044351	1394.85	0.713855	7.86683e-11	macropinocytosis	0	smc5
DDB_G0290927	GO:0044351	1394.85	0.713855	7.86683e-11	macropinocytosis	0	etfa
DDB_G0290967	GO:0044351	1394.85	0.713855	7.86683e-11	macropinocytosis	0	NA
DDB_G0290995	GO:0044351	1394.85	0.713855	7.86683e-11	macropinocytosis	0	DDB_G0290995
DDB_G0290997	GO:0044351	1394.85	0.713855	7.86683e-11	macropinocytosis	1	mppA2
DDB_G0291029	GO:0044351	1394.85	0.713855	7.86683e-11	macropinocytosis	1	DDB_G0291029
DDB_G0291049	GO:0044351	1394.85	0.713855	7.86683e-11	macropinocytosis	1	ost2
DDB_G0291057	GO:0044351	1394.85	0.713855	7.86683e-11	macropinocytosis	1	NA
DDB_G0291061	GO:0044351	1394.85	0.713855	7.86683e-11	macropinocytosis	0	NA
DDB_G0291063	GO:0044351	1394.85	0.713855	7.86683e-11	macropinocytosis	1	thoc2
DDB_G0291077	GO:0044351	1394.85	0.713855	7.86683e-11	macropinocytosis	0	rdiA
DDB_G0291081	GO:0044351	1394.85	0.713855	7.86683e-11	macropinocytosis	1	pefA
DDB_G0291091	GO:0044351	1394.85	0.713855	7.86683e-11	macropinocytosis	0	mapbpip
DDB_G0291097	GO:0044351	1394.85	0.713855	7.86683e-11	macropinocytosis	0	vps33
DDB_G0291105	GO:0044351	1394.85	0.713855	7.86683e-11	macropinocytosis	1	cyp513C1
DDB_G0291107	GO:0044351	1394.85	0.713855	7.86683e-11	macropinocytosis	1	DDB_G0291107
DDB_G0291113	GO:0044351	1394.85	0.713855	7.86683e-11	macropinocytosis	1	aplM
DDB_G0291121	GO:0044351	1394.85	0.713855	7.86683e-11	macropinocytosis	1	cinB
DDB_G0291127	GO:0044351	1394.85	0.713855	7.86683e-11	macropinocytosis	1	mvpB
DDB_G0291129	GO:0044351	1394.85	0.713855	7.86683e-11	macropinocytosis	0	ndufa6
DDB_G0291151	GO:0044351	1394.85	0.713855	7.86683e-11	macropinocytosis	0	NA
DDB_G0291155	GO:0044351	1394.85	0.713855	7.86683e-11	macropinocytosis	0	DDB_G0291155
DDB_G0291157	GO:0044351	1394.85	0.713855	7.86683e-11	macropinocytosis	1	cln3
DDB_G0291161	GO:0044351	1394.85	0.713855	7.86683e-11	macropinocytosis	1	NA
DDB_G0291163	GO:0044351	1394.85	0.713855	7.86683e-11	macropinocytosis	1	nup155
DDB_G0291173	GO:0044351	1394.85	0.713855	7.86683e-11	macropinocytosis	0	ndufv2
DDB_G0291175	GO:0044351	1394.85	0.713855	7.86683e-11	macropinocytosis	1	NA
DDB_G0291179	GO:0044351	1394.85	0.713855	7.86683e-11	macropinocytosis	1	metK
DDB_G0291191	GO:0044351	1394.85	0.713855	7.86683e-11	macropinocytosis	1	DDB_G0291191
DDB_G0291201	GO:0044351	1394.85	0.713855	7.86683e-11	macropinocytosis	1	ctrC
DDB_G0291229	GO:0044351	1394.85	0.713855	7.86683e-11	macropinocytosis	1	abpF
DDB_G0291235	GO:0044351	1394.85	0.713855	7.86683e-11	macropinocytosis	1	ranA
DDB_G0291237	GO:0044351	1394.85	0.713855	7.86683e-11	macropinocytosis	0	rapA
DDB_G0291241	GO:0044351	1394.85	0.713855	7.86683e-11	macropinocytosis	1	gnt2
DDB_G0291245	GO:0044351	1394.85	0.713855	7.86683e-11	macropinocytosis	1	abcA6
DDB_G0291247	GO:0044351	1394.85	0.713855	7.86683e-11	macropinocytosis	0	mfeA
DDB_G0291255	GO:0044351	1394.85	0.713855	7.86683e-11	macropinocytosis	0	29C
DDB_G0291269	GO:0044351	1394.85	0.713855	7.86683e-11	macropinocytosis	0	spg1
DDB_G0291281	GO:0044351	1394.85	0.713855	7.86683e-11	macropinocytosis	1	DDB_G0291281
DDB_G0291283	GO:0044351	1394.85	0.713855	7.86683e-11	macropinocytosis	0	sptB
DDB_G0291301	GO:0044351	1394.85	0.713855	7.86683e-11	macropinocytosis	1	DDB_G0291301
DDB_G0291306	GO:0044351	1394.85	0.713855	7.86683e-11	macropinocytosis	1	xpo1
DDB_G0291324	GO:0044351	1394.85	0.713855	7.86683e-11	macropinocytosis	1	DDB_G0291324
DDB_G0291332	GO:0044351	1394.85	0.713855	7.86683e-11	macropinocytosis	0	DDB_G0291332
DDB_G0291340	GO:0044351	1394.85	0.713855	7.86683e-11	macropinocytosis	0	DDB_G0291340
DDB_G0291344	GO:0044351	1394.85	0.713855	7.86683e-11	macropinocytosis	1	DDB_G0291344
DDB_G0291358	GO:0044351	1394.85	0.713855	7.86683e-11	macropinocytosis	1	cct2
DDB_G0291362	GO:0044351	1394.85	0.713855	7.86683e-11	macropinocytosis	0	rpc19
DDB_G0291366	GO:0044351	1394.85	0.713855	7.86683e-11	macropinocytosis	0	DDB_G0291366
DDB_G0291390	GO:0044351	1394.85	0.713855	7.86683e-11	macropinocytosis	1	nup98
DDB_G0291394	GO:0044351	1394.85	0.713855	7.86683e-11	macropinocytosis	1	DDB_G0291394
DDB_G0291404	GO:0044351	1394.85	0.713855	7.86683e-11	macropinocytosis	1	eif3K
DDB_G0291412	GO:0044351	1394.85	0.713855	7.86683e-11	macropinocytosis	0	srp72
DDB_G0291414	GO:0044351	1394.85	0.713855	7.86683e-11	macropinocytosis	1	NA
DDB_G0291434	GO:0044351	1394.85	0.713855	7.86683e-11	macropinocytosis	1	pdi2
DDB_G0291444	GO:0044351	1394.85	0.713855	7.86683e-11	macropinocytosis	0	NA
DDB_G0291462	GO:0044351	1394.85	0.713855	7.86683e-11	macropinocytosis	0	DDB_G0291462
DDB_G0291490	GO:0044351	1394.85	0.713855	7.86683e-11	macropinocytosis	0	pigT
DDB_G0291512	GO:0044351	1394.85	0.713855	7.86683e-11	macropinocytosis	1	epnA
DDB_G0291526	GO:0044351	1394.85	0.713855	7.86683e-11	macropinocytosis	0	rps14
DDB_G0291532	GO:0044351	1394.85	0.713855	7.86683e-11	macropinocytosis	0	NA
DDB_G0291554	GO:0044351	1394.85	0.713855	7.86683e-11	macropinocytosis	0	DDB_G0291554
DDB_G0291574	GO:0044351	1394.85	0.713855	7.86683e-11	macropinocytosis	1	DDB_G0291574
DDB_G0291606	GO:0044351	1394.85	0.713855	7.86683e-11	macropinocytosis	1	vps8
DDB_G0291636	GO:0044351	1394.85	0.713855	7.86683e-11	macropinocytosis	0	rpb5
DDB_G0291648	GO:0044351	1394.85	0.713855	7.86683e-11	macropinocytosis	1	lpd
DDB_G0291650	GO:0044351	1394.85	0.713855	7.86683e-11	macropinocytosis	1	DDB_G0291650
DDB_G0291652	GO:0044351	1394.85	0.713855	7.86683e-11	macropinocytosis	1	shmt2
DDB_G0291656	GO:0044351	1394.85	0.713855	7.86683e-11	macropinocytosis	0	ykt6
DDB_G0291720	GO:0044351	1394.85	0.713855	7.86683e-11	macropinocytosis	1	DDB_G0291720
DDB_G0291732	GO:0044351	1394.85	0.713855	7.86683e-11	macropinocytosis	0	NA
DDB_G0291738	GO:0044351	1394.85	0.713855	7.86683e-11	macropinocytosis	0	rabG1
DDB_G0291752	GO:0044351	1394.85	0.713855	7.86683e-11	macropinocytosis	1	smc1
DDB_G0291780	GO:0044351	1394.85	0.713855	7.86683e-11	macropinocytosis	0	wbp1
DDB_G0291788	GO:0044351	1394.85	0.713855	7.86683e-11	macropinocytosis	1	adprt3
DDB_G0291804	GO:0044351	1394.85	0.713855	7.86683e-11	macropinocytosis	1	ddx6
DDB_G0291814	GO:0044351	1394.85	0.713855	7.86683e-11	macropinocytosis	1	hao
DDB_G0291828	GO:0044351	1394.85	0.713855	7.86683e-11	macropinocytosis	0	NA
DDB_G0291834	GO:0044351	1394.85	0.713855	7.86683e-11	macropinocytosis	1	cpiA
DDB_G0291838	GO:0044351	1394.85	0.713855	7.86683e-11	macropinocytosis	1	xpo2
DDB_G0291856	GO:0044351	1394.85	0.713855	7.86683e-11	macropinocytosis	1	gerD
DDB_G0291858	GO:0044351	1394.85	0.713855	7.86683e-11	macropinocytosis	1	vatM
DDB_G0291862	GO:0044351	1394.85	0.713855	7.86683e-11	macropinocytosis	0	rpl3
DDB_G0291864	GO:0044351	1394.85	0.713855	7.86683e-11	macropinocytosis	0	rps8
DDB_G0291866	GO:0044351	1394.85	0.713855	7.86683e-11	macropinocytosis	0	ndufab1
DDB_G0291868	GO:0044351	1394.85	0.713855	7.86683e-11	macropinocytosis	0	rfc2
DDB_G0291870	GO:0044351	1394.85	0.713855	7.86683e-11	macropinocytosis	0	rpl13
DDB_G0291872	GO:0044351	1394.85	0.713855	7.86683e-11	macropinocytosis	1	DDB_G0291872
DDB_G0291912	GO:0044351	1394.85	0.713855	7.86683e-11	macropinocytosis	1	DDB_G0291912
DDB_G0291916	GO:0044351	1394.85	0.713855	7.86683e-11	macropinocytosis	1	argJ
DDB_G0291926	GO:0044351	1394.85	0.713855	7.86683e-11	macropinocytosis	1	DDB_G0291926
DDB_G0291948	GO:0044351	1394.85	0.713855	7.86683e-11	macropinocytosis	0	DDB_G0291948
DDB_G0291966	GO:0044351	1394.85	0.713855	7.86683e-11	macropinocytosis	1	DDB_G0291966
DDB_G0291970	GO:0044351	1394.85	0.713855	7.86683e-11	macropinocytosis	0	cofB
DDB_G0291980	GO:0044351	1394.85	0.713855	7.86683e-11	macropinocytosis	1	abcA9
DDB_G0291988	GO:0044351	1394.85	0.713855	7.86683e-11	macropinocytosis	0	NA
DDB_G0291994	GO:0044351	1394.85	0.713855	7.86683e-11	macropinocytosis	1	abcA1
DDB_G0292002	GO:0044351	1394.85	0.713855	7.86683e-11	macropinocytosis	1	ergic3
DDB_G0292016	GO:0044351	1394.85	0.713855	7.86683e-11	macropinocytosis	1	NA
DDB_G0292024	GO:0044351	1394.85	0.713855	7.86683e-11	macropinocytosis	1	DDB_G0292024
DDB_G0292034	GO:0044351	1394.85	0.713855	7.86683e-11	macropinocytosis	1	mcfP
DDB_G0292052	GO:0044351	1394.85	0.713855	7.86683e-11	macropinocytosis	1	sec13
DDB_G0292058	GO:0044351	1394.85	0.713855	7.86683e-11	macropinocytosis	1	DDB_G0292058
DDB_G0292072	GO:0044351	1394.85	0.713855	7.86683e-11	macropinocytosis	0	fdfT
DDB_G0292074	GO:0044351	1394.85	0.713855	7.86683e-11	macropinocytosis	1	commd1
DDB_G0292104	GO:0044351	1394.85	0.713855	7.86683e-11	macropinocytosis	1	tkrA
DDB_G0292116	GO:0044351	1394.85	0.713855	7.86683e-11	macropinocytosis	1	NA
DDB_G0292118	GO:0044351	1394.85	0.713855	7.86683e-11	macropinocytosis	1	alg11
DDB_G0292142	GO:0044351	1394.85	0.713855	7.86683e-11	macropinocytosis	1	cepA
DDB_G0292146	GO:0044351	1394.85	0.713855	7.86683e-11	macropinocytosis	0	NA
DDB_G0292160	GO:0044351	1394.85	0.713855	7.86683e-11	macropinocytosis	0	DDB_G0292160
DDB_G0292206	GO:0044351	1394.85	0.713855	7.86683e-11	macropinocytosis	1	manA
DDB_G0292208	GO:0044351	1394.85	0.713855	7.86683e-11	macropinocytosis	0	DDB_G0292208
DDB_G0292212	GO:0044351	1394.85	0.713855	7.86683e-11	macropinocytosis	0	vps26l
DDB_G0292216	GO:0044351	1394.85	0.713855	7.86683e-11	macropinocytosis	0	bxdc1
DDB_G0292232	GO:0044351	1394.85	0.713855	7.86683e-11	macropinocytosis	0	DDB_G0292232
DDB_G0292244	GO:0044351	1394.85	0.713855	7.86683e-11	macropinocytosis	1	rpb3
DDB_G0292250	GO:0044351	1394.85	0.713855	7.86683e-11	macropinocytosis	1	sqrdl
DDB_G0292268	GO:0044351	1394.85	0.713855	7.86683e-11	macropinocytosis	1	rab2A
[truncated: 37,917 more rows]

## Sheet: Ka_screen_over_BP
Gene_ID	GO_code	expCount	oddsRatio	p_value	GO_term	Ka_phenotype	start_library	Name
DDB_G0267376	GO:0030154	10.5918	2.434	0.000606248	cell differentiation	0	1	acrA
DDB_G0267384	GO:0030154	10.5918	2.434	0.000606248	cell differentiation	1	1	culB
DDB_G0267410	GO:0030154	10.5918	2.434	0.000606248	cell differentiation	0	1	pslA
DDB_G0267474	GO:0030154	10.5918	2.434	0.000606248	cell differentiation	1	1	sigD
DDB_G0268168	GO:0030154	10.5918	2.434	0.000606248	cell differentiation	1	1	png
DDB_G0268920	GO:0030154	10.5918	2.434	0.000606248	cell differentiation	0	1	mef2A
DDB_G0269112	GO:0030154	10.5918	2.434	0.000606248	cell differentiation	1	1	celB
DDB_G0269124	GO:0030154	10.5918	2.434	0.000606248	cell differentiation	0	1	dcsA
DDB_G0269244	GO:0030154	10.5918	2.434	0.000606248	cell differentiation	0	1	atg6A
DDB_G0269364	GO:0030154	10.5918	2.434	0.000606248	cell differentiation	0	1	stlA
DDB_G0270658	GO:0030154	10.5918	2.434	0.000606248	cell differentiation	0	1	acbA
DDB_G0271096	GO:0030154	10.5918	2.434	0.000606248	cell differentiation	0	1	atg7
DDB_G0271134	GO:0030154	10.5918	2.434	0.000606248	cell differentiation	0	1	celA
DDB_G0271546	GO:0030154	10.5918	2.434	0.000606248	cell differentiation	0	1	DDB_G0271546
DDB_G0271684	GO:0030154	10.5918	2.434	0.000606248	cell differentiation	0	1	grlA
DDB_G0272150	GO:0030154	10.5918	2.434	0.000606248	cell differentiation	0	1	grlJ
DDB_G0272344	GO:0030154	10.5918	2.434	0.000606248	cell differentiation	0	1	htt
DDB_G0274101	GO:0030154	10.5918	2.434	0.000606248	cell differentiation	1	1	dokA
DDB_G0274569	GO:0030154	10.5918	2.434	0.000606248	cell differentiation	0	1	acgA
DDB_G0275299	GO:0030154	10.5918	2.434	0.000606248	cell differentiation	1	1	cln5
DDB_G0275451	GO:0030154	10.5918	2.434	0.000606248	cell differentiation	1	1	alxA
DDB_G0275687	GO:0030154	10.5918	2.434	0.000606248	cell differentiation	1	1	abcG18
DDB_G0275689	GO:0030154	10.5918	2.434	0.000606248	cell differentiation	0	1	abcG2
DDB_G0276025	GO:0030154	10.5918	2.434	0.000606248	cell differentiation	0	1	zakA
DDB_G0276155	GO:0030154	10.5918	2.434	0.000606248	cell differentiation	1	1	spnA
DDB_G0276761	GO:0030154	10.5918	2.434	0.000606248	cell differentiation	0	1	cotB
DDB_G0276869	GO:0030154	10.5918	2.434	0.000606248	cell differentiation	1	1	psvA
DDB_G0276887	GO:0030154	10.5918	2.434	0.000606248	cell differentiation	0	1	fbxA
DDB_G0276941	GO:0030154	10.5918	2.434	0.000606248	cell differentiation	0	1	cotA
DDB_G0277075	GO:0030154	10.5918	2.434	0.000606248	cell differentiation	0	1	detA
DDB_G0277141	GO:0030154	10.5918	2.434	0.000606248	cell differentiation	0	1	cotC
DDB_G0277221	GO:0030154	10.5918	2.434	0.000606248	cell differentiation	0	1	chcA
DDB_G0277379	GO:0030154	10.5918	2.434	0.000606248	cell differentiation	0	1	pspD
DDB_G0277589	GO:0030154	10.5918	2.434	0.000606248	cell differentiation	0	1	gtaC
DDB_G0278077	GO:0030154	10.5918	2.434	0.000606248	cell differentiation	0	1	crtf
DDB_G0278581	GO:0030154	10.5918	2.434	0.000606248	cell differentiation	0	1	psiF
DDB_G0278971	GO:0030154	10.5918	2.434	0.000606248	cell differentiation	0	1	dimA
DDB_G0279629	GO:0030154	10.5918	2.434	0.000606248	cell differentiation	0	1	lkb1
DDB_G0280047	GO:0030154	10.5918	2.434	0.000606248	cell differentiation	0	1	yelA
DDB_G0280469	GO:0030154	10.5918	2.434	0.000606248	cell differentiation	1	1	psrA
DDB_G0280961	GO:0030154	10.5918	2.434	0.000606248	cell differentiation	0	1	dhkA
DDB_G0281387	GO:0030154	10.5918	2.434	0.000606248	cell differentiation	0	1	srfA
DDB_G0281545	GO:0030154	10.5918	2.434	0.000606248	cell differentiation	0	1	acaA
DDB_G0281605	GO:0030154	10.5918	2.434	0.000606248	cell differentiation	0	1	cfaD
DDB_G0281663	GO:0030154	10.5918	2.434	0.000606248	cell differentiation	0	1	aprA
DDB_G0281683	GO:0030154	10.5918	2.434	0.000606248	cell differentiation	1	1	msh3
DDB_G0282615	GO:0030154	10.5918	2.434	0.000606248	cell differentiation	0	1	midA
DDB_G0282819	GO:0030154	10.5918	2.434	0.000606248	cell differentiation	0	1	sglA
DDB_G0282923	GO:0030154	10.5918	2.434	0.000606248	cell differentiation	0	1	rdeA
DDB_G0283149	GO:0030154	10.5918	2.434	0.000606248	cell differentiation	1	1	cotD
DDB_G0283265	GO:0030154	10.5918	2.434	0.000606248	cell differentiation	0	1	mkkA
DDB_G0283385	GO:0030154	10.5918	2.434	0.000606248	cell differentiation	1	1	splA
DDB_G0283555	GO:0030154	10.5918	2.434	0.000606248	cell differentiation	0	1	DDB_G0283555
DDB_G0283907	GO:0030154	10.5918	2.434	0.000606248	cell differentiation	0	1	pkaC
DDB_G0283983	GO:0030154	10.5918	2.434	0.000606248	cell differentiation	0	1	hfnA
DDB_G0284183	GO:0030154	10.5918	2.434	0.000606248	cell differentiation	0	1	mrfA
DDB_G0284331	GO:0030154	10.5918	2.434	0.000606248	cell differentiation	0	1	regA
DDB_G0284465	GO:0030154	10.5918	2.434	0.000606248	cell differentiation	0	1	cudA
DDB_G0284613	GO:0030154	10.5918	2.434	0.000606248	cell differentiation	0	1	D7
DDB_G0285161	GO:0030154	10.5918	2.434	0.000606248	cell differentiation	0	1	dagA
DDB_G0285427	GO:0030154	10.5918	2.434	0.000606248	cell differentiation	0	1	mkcA
DDB_G0285431	GO:0030154	10.5918	2.434	0.000606248	cell differentiation	1	1	dia1
DDB_G0285815	GO:0030154	10.5918	2.434	0.000606248	cell differentiation	1	1	gpt1
DDB_G0285939	GO:0030154	10.5918	2.434	0.000606248	cell differentiation	0	1	ctnnA
DDB_G0286119	GO:0030154	10.5918	2.434	0.000606248	cell differentiation	1	1	tagB
DDB_G0286121	GO:0030154	10.5918	2.434	0.000606248	cell differentiation	0	1	tagC
DDB_G0286385	GO:0030154	10.5918	2.434	0.000606248	cell differentiation	1	1	padA
DDB_G0286961	GO:0030154	10.5918	2.434	0.000606248	cell differentiation	0	1	rbrA
DDB_G0287101	GO:0030154	10.5918	2.434	0.000606248	cell differentiation	0	1	noxB
DDB_G0287295	GO:0030154	10.5918	2.434	0.000606248	cell differentiation	0	1	forC
DDB_G0287583	GO:0030154	10.5918	2.434	0.000606248	cell differentiation	0	1	gerC
DDB_G0287585	GO:0030154	10.5918	2.434	0.000606248	cell differentiation	0	1	rgaA
DDB_G0287687	GO:0030154	10.5918	2.434	0.000606248	cell differentiation	0	1	gerB
DDB_G0287969	GO:0030154	10.5918	2.434	0.000606248	cell differentiation	0	1	cnrN
DDB_G0288047	GO:0030154	10.5918	2.434	0.000606248	cell differentiation	1	1	dnmA
DDB_G0288375	GO:0030154	10.5918	2.434	0.000606248	cell differentiation	0	1	lis1
DDB_G0288495	GO:0030154	10.5918	2.434	0.000606248	cell differentiation	0	1	smdA
DDB_G0288877	GO:0030154	10.5918	2.434	0.000606248	cell differentiation	0	1	aarA
DDB_G0289329	GO:0030154	10.5918	2.434	0.000606248	cell differentiation	1	1	dmtA
DDB_G0289521	GO:0030154	10.5918	2.434	0.000606248	cell differentiation	0	1	srsA
DDB_G0289653	GO:0030154	10.5918	2.434	0.000606248	cell differentiation	0	1	noxA
DDB_G0290079	GO:0030154	10.5918	2.434	0.000606248	cell differentiation	1	1	pgtB
DDB_G0290551	GO:0030154	10.5918	2.434	0.000606248	cell differentiation	0	1	rblA
DDB_G0290853	GO:0030154	10.5918	2.434	0.000606248	cell differentiation	1	1	stlB
DDB_G0291075	GO:0030154	10.5918	2.434	0.000606248	cell differentiation	0	1	warA
DDB_G0291117	GO:0030154	10.5918	2.434	0.000606248	cell differentiation	0	1	noxC
DDB_G0291253	GO:0030154	10.5918	2.434	0.000606248	cell differentiation	0	1	dia2
DDB_G0291352	GO:0030154	10.5918	2.434	0.000606248	cell differentiation	0	1	psenA
DDB_G0291372	GO:0030154	10.5918	2.434	0.000606248	cell differentiation	0	1	dimB
DDB_G0291512	GO:0030154	10.5918	2.434	0.000606248	cell differentiation	0	1	epnA
DDB_G0291556	GO:0030154	10.5918	2.434	0.000606248	cell differentiation	0	1	prmt1
DDB_G0291972	GO:0030154	10.5918	2.434	0.000606248	cell differentiation	0	1	culA
DDB_G0291982	GO:0030154	10.5918	2.434	0.000606248	cell differentiation	0	1	psiA
DDB_G0292266	GO:0030154	10.5918	2.434	0.000606248	cell differentiation	0	1	amdA
DDB_G0292310	GO:0030154	10.5918	2.434	0.000606248	cell differentiation	0	1	psenB
DDB_G0292390	GO:0030154	10.5918	2.434	0.000606248	cell differentiation	0	1	atg1
DDB_G0292436	GO:0030154	10.5918	2.434	0.000606248	cell differentiation	0	1	triA
DDB_G0293002	GO:0030154	10.5918	2.434	0.000606248	cell differentiation	0	1	tagA
DDB_G0293008	GO:0030154	10.5918	2.434	0.000606248	cell differentiation	0	1	cpnA
DDB_G0293236	GO:0030154	10.5918	2.434	0.000606248	cell differentiation	0	1	DDB_G0293236
DDB_G0293524	GO:0030154	10.5918	2.434	0.000606248	cell differentiation	0	1	ppk1
DDB_G0294407	GO:0030154	10.5918	2.434	0.000606248	cell differentiation	0	1	helF
DDB_G0294473	GO:0030154	10.5918	2.434	0.000606248	cell differentiation	0	1	staA
DDB_G0270854	GO:0042558	1.234	8.82025	0.000616566	pteridine-containing compound metabolic process	1	1	nif3
DDB_G0272684	GO:0042558	1.234	8.82025	0.000616566	pteridine-containing compound metabolic process	0	1	qdpr
DDB_G0277725	GO:0042558	1.234	8.82025	0.000616566	pteridine-containing compound metabolic process	0	1	thfA
DDB_G0277947	GO:0042558	1.234	8.82025	0.000616566	pteridine-containing compound metabolic process	1	1	shmt1
DDB_G0278283	GO:0042558	1.234	8.82025	0.000616566	pteridine-containing compound metabolic process	0	1	fol1
DDB_G0284699	GO:0042558	1.234	8.82025	0.000616566	pteridine-containing compound metabolic process	1	1	mtr
DDB_G0286755	GO:0042558	1.234	8.82025	0.000616566	pteridine-containing compound metabolic process	0	1	DDB_G0286755
DDB_G0287977	GO:0042558	1.234	8.82025	0.000616566	pteridine-containing compound metabolic process	0	1	ftcd
DDB_G0290009	GO:0042558	1.234	8.82025	0.000616566	pteridine-containing compound metabolic process	1	1	sr
DDB_G0290397	GO:0042558	1.234	8.82025	0.000616566	pteridine-containing compound metabolic process	1	1	fthS
DDB_G0291652	GO:0042558	1.234	8.82025	0.000616566	pteridine-containing compound metabolic process	1	1	shmt2
DDB_G0292632	GO:0042558	1.234	8.82025	0.000616566	pteridine-containing compound metabolic process	0	1	folC
DDB_G0267376	GO:0032502	39.2823	1.63722	0.00114243	developmental process	0	1	acrA
DDB_G0267384	GO:0032502	39.2823	1.63722	0.00114243	developmental process	1	1	culB
DDB_G0267400	GO:0032502	39.2823	1.63722	0.00114243	developmental process	0	1	hspD
DDB_G0267410	GO:0032502	39.2823	1.63722	0.00114243	developmental process	0	1	pslA
DDB_G0267422	GO:0032502	39.2823	1.63722	0.00114243	developmental process	0	1	tipC
DDB_G0267424	GO:0032502	39.2823	1.63722	0.00114243	developmental process	1	1	amtC
DDB_G0267426	GO:0032502	39.2823	1.63722	0.00114243	developmental process	0	1	cshA
DDB_G0267432	GO:0032502	39.2823	1.63722	0.00114243	developmental process	0	1	abcG15
DDB_G0267436	GO:0032502	39.2823	1.63722	0.00114243	developmental process	0	1	abcF4
DDB_G0267444	GO:0032502	39.2823	1.63722	0.00114243	developmental process	0	1	phg1A
DDB_G0267452	GO:0032502	39.2823	1.63722	0.00114243	developmental process	0	1	sonA
DDB_G0267460	GO:0032502	39.2823	1.63722	0.00114243	developmental process	0	1	cybA
DDB_G0267462	GO:0032502	39.2823	1.63722	0.00114243	developmental process	0	1	Dd5P4
DDB_G0267470	GO:0032502	39.2823	1.63722	0.00114243	developmental process	0	1	dicB
DDB_G0267474	GO:0032502	39.2823	1.63722	0.00114243	developmental process	1	1	sigD
DDB_G0267476	GO:0032502	39.2823	1.63722	0.00114243	developmental process	0	1	sigK
DDB_G0267830	GO:0032502	39.2823	1.63722	0.00114243	developmental process	0	1	gemA
DDB_G0267962	GO:0032502	39.2823	1.63722	0.00114243	developmental process	0	1	tsuA
DDB_G0268144	GO:0032502	39.2823	1.63722	0.00114243	developmental process	0	1	vwkA
DDB_G0268168	GO:0032502	39.2823	1.63722	0.00114243	developmental process	1	1	png
DDB_G0268266	GO:0032502	39.2823	1.63722	0.00114243	developmental process	0	1	DDB_G0268266
DDB_G0268446	GO:0032502	39.2823	1.63722	0.00114243	developmental process	0	1	cbhA
DDB_G0268578	GO:0032502	39.2823	1.63722	0.00114243	developmental process	1	1	gefV
DDB_G0268632	GO:0032502	39.2823	1.63722	0.00114243	developmental process	0	1	abpA
DDB_G0268636	GO:0032502	39.2823	1.63722	0.00114243	developmental process	0	1	roco11
DDB_G0268790	GO:0032502	39.2823	1.63722	0.00114243	developmental process	0	1	DDB_G0268790
DDB_G0268920	GO:0032502	39.2823	1.63722	0.00114243	developmental process	0	1	mef2A
DDB_G0269100	GO:0032502	39.2823	1.63722	0.00114243	developmental process	1	1	abpC
DDB_G0269108	GO:0032502	39.2823	1.63722	0.00114243	developmental process	0	1	catB
DDB_G0269112	GO:0032502	39.2823	1.63722	0.00114243	developmental process	1	1	celB
DDB_G0269124	GO:0032502	39.2823	1.63722	0.00114243	developmental process	0	1	dcsA
DDB_G0269152	GO:0032502	39.2823	1.63722	0.00114243	developmental process	0	1	mekA
DDB_G0269154	GO:0032502	39.2823	1.63722	0.00114243	developmental process	0	1	modA
DDB_G0269160	GO:0032502	39.2823	1.63722	0.00114243	developmental process	0	1	nxnA
DDB_G0269166	GO:0032502	39.2823	1.63722	0.00114243	developmental process	1	1	pakA
DDB_G0269184	GO:0032502	39.2823	1.63722	0.00114243	developmental process	0	1	rzpA
DDB_G0269202	GO:0032502	39.2823	1.63722	0.00114243	developmental process	0	1	gdcA
DDB_G0269222	GO:0032502	39.2823	1.63722	0.00114243	developmental process	0	1	gefB
DDB_G0269234	GO:0032502	39.2823	1.63722	0.00114243	developmental process	0	1	act8
DDB_G0269244	GO:0032502	39.2823	1.63722	0.00114243	developmental process	0	1	atg6A
DDB_G0269248	GO:0032502	39.2823	1.63722	0.00114243	developmental process	0	1	cf45-1
DDB_G0269364	GO:0032502	39.2823	1.63722	0.00114243	developmental process	0	1	stlA
DDB_G0269610	GO:0032502	39.2823	1.63722	0.00114243	developmental process	0	1	gxcT
DDB_G0269696	GO:0032502	39.2823	1.63722	0.00114243	developmental process	0	1	pakD
DDB_G0269902	GO:0032502	39.2823	1.63722	0.00114243	developmental process	0	1	act26
DDB_G0269914	GO:0032502	39.2823	1.63722	0.00114243	developmental process	0	1	tpp1
DDB_G0270024	GO:0032502	39.2823	1.63722	0.00114243	developmental process	0	1	mgp2
DDB_G0270434	GO:0032502	39.2823	1.63722	0.00114243	developmental process	0	1	med23
DDB_G0270658	GO:0032502	39.2823	1.63722	0.00114243	developmental process	0	1	acbA
DDB_G0270666	GO:0032502	39.2823	1.63722	0.00114243	developmental process	0	1	gdt2
DDB_G0270756	GO:0032502	39.2823	1.63722	0.00114243	developmental process	0	1	gtaG
DDB_G0270994	GO:0032502	39.2823	1.63722	0.00114243	developmental process	1	1	psaA
DDB_G0271022	GO:0032502	39.2823	1.63722	0.00114243	developmental process	0	1	adcC
DDB_G0271096	GO:0032502	39.2823	1.63722	0.00114243	developmental process	0	1	atg7
DDB_G0271134	GO:0032502	39.2823	1.63722	0.00114243	developmental process	0	1	celA
DDB_G0271140	GO:0032502	39.2823	1.63722	0.00114243	developmental process	0	1	abcA7
DDB_G0271346	GO:0032502	39.2823	1.63722	0.00114243	developmental process	1	1	yod1
DDB_G0271500	GO:0032502	39.2823	1.63722	0.00114243	developmental process	1	1	keaA
DDB_G0271502	GO:0032502	39.2823	1.63722	0.00114243	developmental process	0	1	lvsD
DDB_G0271504	GO:0032502	39.2823	1.63722	0.00114243	developmental process	1	1	lvsB
DDB_G0271546	GO:0032502	39.2823	1.63722	0.00114243	developmental process	0	1	DDB_G0271546
DDB_G0271586	GO:0032502	39.2823	1.63722	0.00114243	developmental process	0	1	tgrK1
DDB_G0271598	GO:0032502	39.2823	1.63722	0.00114243	developmental process	0	1	tgrS1
DDB_G0271626	GO:0032502	39.2823	1.63722	0.00114243	developmental process	1	1	dotA
DDB_G0271646	GO:0032502	39.2823	1.63722	0.00114243	developmental process	0	1	tgrK2
DDB_G0271654	GO:0032502	39.2823	1.63722	0.00114243	developmental process	0	1	tgrK3
DDB_G0271684	GO:0032502	39.2823	1.63722	0.00114243	developmental process	0	1	grlA
DDB_G0271692	GO:0032502	39.2823	1.63722	0.00114243	developmental process	1	1	comC
DDB_G0272002	GO:0032502	39.2823	1.63722	0.00114243	developmental process	0	1	egeA
DDB_G0272038	GO:0032502	39.2823	1.63722	0.00114243	developmental process	0	1	rgfA
DDB_G0272106	GO:0032502	39.2823	1.63722	0.00114243	developmental process	0	1	arpB
DDB_G0272116	GO:0032502	39.2823	1.63722	0.00114243	developmental process	0	1	ppp4c
DDB_G0272150	GO:0032502	39.2823	1.63722	0.00114243	developmental process	0	1	grlJ
DDB_G0272248	GO:0032502	39.2823	1.63722	0.00114243	developmental process	0	1	act16
DDB_G0272344	GO:0032502	39.2823	1.63722	0.00114243	developmental process	0	1	htt
DDB_G0272754	GO:0032502	39.2823	1.63722	0.00114243	developmental process	0	1	gsr
DDB_G0272837	GO:0032502	39.2823	1.63722	0.00114243	developmental process	0	1	ifkA
DDB_G0272861	GO:0032502	39.2823	1.63722	0.00114243	developmental process	0	1	cosA
DDB_G0274101	GO:0032502	39.2823	1.63722	0.00114243	developmental process	1	1	dokA
DDB_G0274103	GO:0032502	39.2823	1.63722	0.00114243	developmental process	0	1	ggtA
DDB_G0274107	GO:0032502	39.2823	1.63722	0.00114243	developmental process	0	1	sfbA
DDB_G0274119	GO:0032502	39.2823	1.63722	0.00114243	developmental process	0	1	abcA5
DDB_G0274121	GO:0032502	39.2823	1.63722	0.00114243	developmental process	1	1	abcA4
DDB_G0274135	GO:0032502	39.2823	1.63722	0.00114243	developmental process	0	1	act6
DDB_G0274139	GO:0032502	39.2823	1.63722	0.00114243	developmental process	0	1	cycC
DDB_G0274177	GO:0032502	39.2823	1.63722	0.00114243	developmental process	0	1	DDB_G0274177
DDB_G0274191	GO:0032502	39.2823	1.63722	0.00114243	developmental process	0	1	dhkC
DDB_G0274383	GO:0032502	39.2823	1.63722	0.00114243	developmental process	0	1	pdeD
DDB_G0274395	GO:0032502	39.2823	1.63722	0.00114243	developmental process	0	1	adcB
DDB_G0274455	GO:0032502	39.2823	1.63722	0.00114243	developmental process	1	1	myoI
DDB_G0274569	GO:0032502	39.2823	1.63722	0.00114243	developmental process	0	1	acgA
DDB_G0274577	GO:0032502	39.2823	1.63722	0.00114243	developmental process	1	1	DG1124
DDB_G0274597	GO:0032502	39.2823	1.63722	0.00114243	developmental process	0	1	ctnA
DDB_G0274741	GO:0032502	39.2823	1.63722	0.00114243	developmental process	0	1	gnt15
DDB_G0274805	GO:0032502	39.2823	1.63722	0.00114243	developmental process	0	1	ibrA
DDB_G0275045	GO:0032502	39.2823	1.63722	0.00114243	developmental process	0	1	gpbB
DDB_G0275065	GO:0032502	39.2823	1.63722	0.00114243	developmental process	0	1	dmpA
DDB_G0275077	GO:0032502	39.2823	1.63722	0.00114243	developmental process	0	1	pks17
DDB_G0275299	GO:0032502	39.2823	1.63722	0.00114243	developmental process	1	1	cln5
DDB_G0275437	GO:0032502	39.2823	1.63722	0.00114243	developmental process	0	1	7E
DDB_G0275451	GO:0032502	39.2823	1.63722	0.00114243	developmental process	1	1	alxA
DDB_G0275519	GO:0032502	39.2823	1.63722	0.00114243	developmental process	0	1	DDB_G0275519
DDB_G0275635	GO:0032502	39.2823	1.63722	0.00114243	developmental process	0	1	pik6
DDB_G0275687	GO:0032502	39.2823	1.63722	0.00114243	developmental process	1	1	abcG18
DDB_G0275689	GO:0032502	39.2823	1.63722	0.00114243	developmental process	0	1	abcG2
DDB_G0275695	GO:0032502	39.2823	1.63722	0.00114243	developmental process	0	1	ampA
DDB_G0275747	GO:0032502	39.2823	1.63722	0.00114243	developmental process	0	1	DDB_G0275747
DDB_G0275815	GO:0032502	39.2823	1.63722	0.00114243	developmental process	0	1	nrampB
DDB_G0275931	GO:0032502	39.2823	1.63722	0.00114243	developmental process	0	1	ncsA
DDB_G0276025	GO:0032502	39.2823	1.63722	0.00114243	developmental process	0	1	zakA
DDB_G0276077	GO:0032502	39.2823	1.63722	0.00114243	developmental process	0	1	mlcR
DDB_G0276155	GO:0032502	39.2823	1.63722	0.00114243	developmental process	1	1	spnA
DDB_G0276251	GO:0032502	39.2823	1.63722	0.00114243	developmental process	1	1	DDB_G0276251
DDB_G0276267	GO:0032502	39.2823	1.63722	0.00114243	developmental process	0	1	gpaB
DDB_G0276333	GO:0032502	39.2823	1.63722	0.00114243	developmental process	0	1	tipB
DDB_G0276363	GO:0032502	39.2823	1.63722	0.00114243	developmental process	0	1	myoG
DDB_G0276371	GO:0032502	39.2823	1.63722	0.00114243	developmental process	0	1	gefL
DDB_G0276399	GO:0032502	39.2823	1.63722	0.00114243	developmental process	0	1	rab8B
DDB_G0276465	GO:0032502	39.2823	1.63722	0.00114243	developmental process	0	1	sepA
DDB_G0276761	GO:0032502	39.2823	1.63722	0.00114243	developmental process	0	1	cotB
DDB_G0276869	GO:0032502	39.2823	1.63722	0.00114243	developmental process	1	1	psvA
DDB_G0276883	GO:0032502	39.2823	1.63722	0.00114243	developmental process	1	1	canA
DDB_G0276887	GO:0032502	39.2823	1.63722	0.00114243	developmental process	0	1	fbxA
DDB_G0276941	GO:0032502	39.2823	1.63722	0.00114243	developmental process	0	1	cotA
DDB_G0277071	GO:0032502	39.2823	1.63722	0.00114243	developmental process	0	1	dupA
DDB_G0277075	GO:0032502	39.2823	1.63722	0.00114243	developmental process	0	1	detA
DDB_G0277141	GO:0032502	39.2823	1.63722	0.00114243	developmental process	0	1	cotC
DDB_G0277143	GO:0032502	39.2823	1.63722	0.00114243	developmental process	0	1	gpbA
DDB_G0277165	GO:0032502	39.2823	1.63722	0.00114243	developmental process	0	1	DDB_G0277165
DDB_G0277221	GO:0032502	39.2823	1.63722	0.00114243	developmental process	0	1	chcA
DDB_G0277223	GO:0032502	39.2823	1.63722	0.00114243	developmental process	0	1	dgkA
DDB_G0277273	GO:0032502	39.2823	1.63722	0.00114243	developmental process	0	1	phg1B
DDB_G0277379	GO:0032502	39.2823	1.63722	0.00114243	developmental process	0	1	pspD
DDB_G0277399	GO:0032502	39.2823	1.63722	0.00114243	developmental process	0	1	piaA
DDB_G0277403	GO:0032502	39.2823	1.63722	0.00114243	developmental process	0	1	clc
DDB_G0277503	GO:0032502	39.2823	1.63722	0.00114243	developmental process	0	1	amtA
DDB_G0277589	GO:0032502	39.2823	1.63722	0.00114243	developmental process	0	1	gtaC
DDB_G0277829	GO:0032502	39.2823	1.63722	0.00114243	developmental process	0	1	carC
DDB_G0277831	GO:0032502	39.2823	1.63722	0.00114243	developmental process	0	1	carD
DDB_G0277843	GO:0032502	39.2823	1.63722	0.00114243	developmental process	1	1	scaA
DDB_G0277845	GO:0032502	39.2823	1.63722	0.00114243	developmental process	0	1	dhkB
DDB_G0277859	GO:0032502	39.2823	1.63722	0.00114243	developmental process	0	1	mlcE
DDB_G0277863	GO:0032502	39.2823	1.63722	0.00114243	developmental process	0	1	pdiA
DDB_G0277865	GO:0032502	39.2823	1.63722	0.00114243	developmental process	1	1	ptpB
DDB_G0277871	GO:0032502	39.2823	1.63722	0.00114243	developmental process	0	1	rsc12
DDB_G0277887	GO:0032502	39.2823	1.63722	0.00114243	developmental process	0	1	dhkK
DDB_G0277987	GO:0032502	39.2823	1.63722	0.00114243	developmental process	0	1	gxcA
DDB_G0278051	GO:0032502	39.2823	1.63722	0.00114243	developmental process	0	1	elmoA
DDB_G0278077	GO:0032502	39.2823	1.63722	0.00114243	developmental process	0	1	crtf
DDB_G0278333	GO:0032502	39.2823	1.63722	0.00114243	developmental process	0	1	DDB_G0278333
DDB_G0278525	GO:0032502	39.2823	1.63722	0.00114243	developmental process	0	1	plaA
DDB_G0278581	GO:0032502	39.2823	1.63722	0.00114243	developmental process	0	1	psiF
DDB_G0278639	GO:0032502	39.2823	1.63722	0.00114243	developmental process	0	1	clcD
DDB_G0278723	GO:0032502	39.2823	1.63722	0.00114243	developmental process	0	1	gdt1
DDB_G0278727	GO:0032502	39.2823	1.63722	0.00114243	developmental process	0	1	pikA
DDB_G0278737	GO:0032502	39.2823	1.63722	0.00114243	developmental process	0	1	rckA
DDB_G0278741	GO:0032502	39.2823	1.63722	0.00114243	developmental process	0	1	adprt1A
DDB_G0278945	GO:0032502	39.2823	1.63722	0.00114243	developmental process	1	1	DDB_G0278945
DDB_G0278971	GO:0032502	39.2823	1.63722	0.00114243	developmental process	0	1	dimA
DDB_G0279257	GO:0032502	39.2823	1.63722	0.00114243	developmental process	0	1	hbx8
DDB_G0279483	GO:0032502	39.2823	1.63722	0.00114243	developmental process	0	1	pldB
DDB_G0279629	GO:0032502	39.2823	1.63722	0.00114243	developmental process	0	1	lkb1
DDB_G0279649	GO:0032502	39.2823	1.63722	0.00114243	developmental process	0	1	acapA
DDB_G0279733	GO:0032502	39.2823	1.63722	0.00114243	developmental process	1	1	gxcDD
DDB_G0279797	GO:0032502	39.2823	1.63722	0.00114243	developmental process	1	1	ctnB
DDB_G0279915	GO:0032502	39.2823	1.63722	0.00114243	developmental process	0	1	abcB4
DDB_G0279945	GO:0032502	39.2823	1.63722	0.00114243	developmental process	0	1	DDB_G0279945
DDB_G0280043	GO:0032502	39.2823	1.63722	0.00114243	developmental process	0	1	rab8A
DDB_G0280047	GO:0032502	39.2823	1.63722	0.00114243	developmental process	0	1	yelA
DDB_G0280055	GO:0032502	39.2823	1.63722	0.00114243	developmental process	0	1	abcC2
DDB_G0280267	GO:0032502	39.2823	1.63722	0.00114243	developmental process	1	1	allC
DDB_G0280469	GO:0032502	39.2823	1.63722	0.00114243	developmental process	1	1	psrA
DDB_G0280473	GO:0032502	39.2823	1.63722	0.00114243	developmental process	0	1	hbx9
DDB_G0280531	GO:0032502	39.2823	1.63722	0.00114243	developmental process	0	1	tgrC1
DDB_G0280539	GO:0032502	39.2823	1.63722	0.00114243	developmental process	0	1	abcC13
DDB_G0280545	GO:0032502	39.2823	1.63722	0.00114243	developmental process	0	1	act7
DDB_G0280547	GO:0032502	39.2823	1.63722	0.00114243	developmental process	0	1	comH
DDB_G0280635	GO:0032502	39.2823	1.63722	0.00114243	developmental process	0	1	tgrC2
DDB_G0280705	GO:0032502	39.2823	1.63722	0.00114243	developmental process	0	1	chdB
DDB_G0280847	GO:0032502	39.2823	1.63722	0.00114243	developmental process	0	1	2C
DDB_G0280961	GO:0032502	39.2823	1.63722	0.00114243	developmental process	0	1	dhkA
DDB_G0280975	GO:0032502	39.2823	1.63722	0.00114243	developmental process	0	1	racE
DDB_G0281221	GO:0032502	39.2823	1.63722	0.00114243	developmental process	0	1	tbccd
DDB_G0281385	GO:0032502	39.2823	1.63722	0.00114243	developmental process	0	1	rasC
DDB_G0281387	GO:0032502	39.2823	1.63722	0.00114243	developmental process	0	1	srfA
DDB_G0281389	GO:0032502	39.2823	1.63722	0.00114243	developmental process	0	1	abcG6
DDB_G0281407	GO:0032502	39.2823	1.63722	0.00114243	developmental process	0	1	tgrC5
DDB_G0281545	GO:0032502	39.2823	1.63722	0.00114243	developmental process	0	1	acaA
DDB_G0281553	GO:0032502	39.2823	1.63722	0.00114243	developmental process	0	1	helC
DDB_G0281561	GO:0032502	39.2823	1.63722	0.00114243	developmental process	0	1	tipA
DDB_G0281563	GO:0032502	39.2823	1.63722	0.00114243	developmental process	0	1	mybC
DDB_G0281571	GO:0032502	39.2823	1.63722	0.00114243	developmental process	0	1	comE
DDB_G0281605	GO:0032502	39.2823	1.63722	0.00114243	developmental process	0	1	cfaD
DDB_G0281663	GO:0032502	39.2823	1.63722	0.00114243	developmental process	0	1	aprA
DDB_G0281671	GO:0032502	39.2823	1.63722	0.00114243	developmental process	0	1	DDB_G0281671
DDB_G0281683	GO:0032502	39.2823	1.63722	0.00114243	developmental process	1	1	msh3
DDB_G0281825	GO:0032502	39.2823	1.63722	0.00114243	developmental process	0	1	comB
DDB_G0281891	GO:0032502	39.2823	1.63722	0.00114243	developmental process	0	1	rbg3
DDB_G0282009	GO:0032502	39.2823	1.63722	0.00114243	developmental process	0	1	ahhA
DDB_G0282093	GO:0032502	39.2823	1.63722	0.00114243	developmental process	0	1	DDB_G0282093
DDB_G0282103	GO:0032502	39.2823	1.63722	0.00114243	developmental process	0	1	abcG24
DDB_G0282223	GO:0032502	39.2823	1.63722	0.00114243	developmental process	0	1	DDB_G0282223
DDB_G0282375	GO:0032502	39.2823	1.63722	0.00114243	developmental process	0	1	amiB
DDB_G0282419	GO:0032502	39.2823	1.63722	0.00114243	developmental process	0	1	cyp508B1
DDB_G0282615	GO:0032502	39.2823	1.63722	0.00114243	developmental process	0	1	midA
DDB_G0282819	GO:0032502	39.2823	1.63722	0.00114243	developmental process	0	1	sglA
DDB_G0282923	GO:0032502	39.2823	1.63722	0.00114243	developmental process	0	1	rdeA
DDB_G0283015	GO:0032502	39.2823	1.63722	0.00114243	developmental process	0	1	DDB_G0283015
DDB_G0283081	GO:0032502	39.2823	1.63722	0.00114243	developmental process	0	1	pikB
DDB_G0283149	GO:0032502	39.2823	1.63722	0.00114243	developmental process	1	1	cotD
DDB_G0283263	GO:0032502	39.2823	1.63722	0.00114243	developmental process	0	1	migA
DDB_G0283265	GO:0032502	39.2823	1.63722	0.00114243	developmental process	0	1	mkkA
DDB_G0283345	GO:0032502	39.2823	1.63722	0.00114243	developmental process	0	1	comD
DDB_G0283385	GO:0032502	39.2823	1.63722	0.00114243	developmental process	1	1	splA
DDB_G0283387	GO:0032502	39.2823	1.63722	0.00114243	developmental process	0	1	abcA10
DDB_G0283537	GO:0032502	39.2823	1.63722	0.00114243	developmental process	0	1	rasS
DDB_G0283555	GO:0032502	39.2823	1.63722	0.00114243	developmental process	0	1	DDB_G0283555
DDB_G0283605	GO:0032502	39.2823	1.63722	0.00114243	developmental process	0	1	yakA
DDB_G0283615	GO:0032502	39.2823	1.63722	0.00114243	developmental process	0	1	rpkA
DDB_G0283699	GO:0032502	39.2823	1.63722	0.00114243	developmental process	0	1	phg2
DDB_G0283855	GO:0032502	39.2823	1.63722	0.00114243	developmental process	0	1	gpr89
DDB_G0283907	GO:0032502	39.2823	1.63722	0.00114243	developmental process	0	1	pkaC
DDB_G0283983	GO:0032502	39.2823	1.63722	0.00114243	developmental process	0	1	hfnA
DDB_G0284047	GO:0032502	39.2823	1.63722	0.00114243	developmental process	0	1	abcF2
DDB_G0284065	GO:0032502	39.2823	1.63722	0.00114243	developmental process	1	1	rapgap9
DDB_G0284171	GO:0032502	39.2823	1.63722	0.00114243	developmental process	0	1	chdA
DDB_G0284177	GO:0032502	39.2823	1.63722	0.00114243	developmental process	0	1	DDB_G0284177
DDB_G0284181	GO:0032502	39.2823	1.63722	0.00114243	developmental process	0	1	krsA
DDB_G0284183	GO:0032502	39.2823	1.63722	0.00114243	developmental process	0	1	mrfA
DDB_G0284329	GO:0032502	39.2823	1.63722	0.00114243	developmental process	0	1	gefA
DDB_G0284331	GO:0032502	39.2823	1.63722	0.00114243	developmental process	0	1	regA
DDB_G0284363	GO:0032502	39.2823	1.63722	0.00114243	developmental process	0	1	cf60
DDB_G0284465	GO:0032502	39.2823	1.63722	0.00114243	developmental process	0	1	cudA
DDB_G0284469	GO:0032502	39.2823	1.63722	0.00114243	developmental process	0	1	gpaH
DDB_G0284611	GO:0032502	39.2823	1.63722	0.00114243	developmental process	0	1	ripA
DDB_G0284613	GO:0032502	39.2823	1.63722	0.00114243	developmental process	0	1	D7
DDB_G0284619	GO:0032502	39.2823	1.63722	0.00114243	developmental process	0	1	DDB_G0284619
DDB_G0284659	GO:0032502	39.2823	1.63722	0.00114243	developmental process	0	1	tgrL1
DDB_G0284845	GO:0032502	39.2823	1.63722	0.00114243	developmental process	0	1	gxcC
DDB_G0284867	GO:0032502	39.2823	1.63722	0.00114243	developmental process	0	1	abcC8
DDB_G0285083	GO:0032502	39.2823	1.63722	0.00114243	developmental process	1	1	DDB_G0285083
DDB_G0285161	GO:0032502	39.2823	1.63722	0.00114243	developmental process	0	1	dagA
DDB_G0285163	GO:0032502	39.2823	1.63722	0.00114243	developmental process	0	1	gacT
DDB_G0285165	GO:0032502	39.2823	1.63722	0.00114243	developmental process	0	1	abcC9
DDB_G0285175	GO:0032502	39.2823	1.63722	0.00114243	developmental process	0	1	vmp1
DDB_G0285253	GO:0032502	39.2823	1.63722	0.00114243	developmental process	0	1	scrA
DDB_G0285323	GO:0032502	39.2823	1.63722	0.00114243	developmental process	0	1	atg9
DDB_G0285427	GO:0032502	39.2823	1.63722	0.00114243	developmental process	0	1	mkcA
DDB_G0285431	GO:0032502	39.2823	1.63722	0.00114243	developmental process	1	1	dia1
DDB_G0285455	GO:0032502	39.2823	1.63722	0.00114243	developmental process	0	1	impA
DDB_G0285589	GO:0032502	39.2823	1.63722	0.00114243	developmental process	0	1	forH
DDB_G0285815	GO:0032502	39.2823	1.63722	0.00114243	developmental process	1	1	gpt1
DDB_G0285837	GO:0032502	39.2823	1.63722	0.00114243	developmental process	0	1	DDB_G0285837
DDB_G0285845	GO:0032502	39.2823	1.63722	0.00114243	developmental process	0	1	phdA
DDB_G0285925	GO:0032502	39.2823	1.63722	0.00114243	developmental process	0	1	sunB
DDB_G0285939	GO:0032502	39.2823	1.63722	0.00114243	developmental process	0	1	ctnnA
DDB_G0285997	GO:0032502	39.2823	1.63722	0.00114243	developmental process	1	1	abcF1
DDB_G0286119	GO:0032502	39.2823	1.63722	0.00114243	developmental process	1	1	tagB
DDB_G0286121	GO:0032502	39.2823	1.63722	0.00114243	developmental process	0	1	tagC
DDB_G0286303	GO:0032502	39.2823	1.63722	0.00114243	developmental process	0	1	ku80
DDB_G0286353	GO:0032502	39.2823	1.63722	0.00114243	developmental process	0	1	erkA
DDB_G0286355	GO:0032502	39.2823	1.63722	0.00114243	developmental process	0	1	mhcA
DDB_G0286359	GO:0032502	39.2823	1.63722	0.00114243	developmental process	0	1	svkA
DDB_G0286385	GO:0032502	39.2823	1.63722	0.00114243	developmental process	1	1	padA
DDB_G0286557	GO:0032502	39.2823	1.63722	0.00114243	developmental process	0	1	pten
DDB_G0286733	GO:0032502	39.2823	1.63722	0.00114243	developmental process	0	1	hbx12
DDB_G0286825	GO:0032502	39.2823	1.63722	0.00114243	developmental process	0	1	tgrD1
DDB_G0286961	GO:0032502	39.2823	1.63722	0.00114243	developmental process	0	1	rbrA
DDB_G0287101	GO:0032502	39.2823	1.63722	0.00114243	developmental process	0	1	noxB
DDB_G0287125	GO:0032502	39.2823	1.63722	0.00114243	developmental process	0	1	proA
DDB_G0287291	GO:0032502	39.2823	1.63722	0.00114243	developmental process	0	1	abpD
DDB_G0287295	GO:0032502	39.2823	1.63722	0.00114243	developmental process	0	1	forC
DDB_G0287327	GO:0032502	39.2823	1.63722	0.00114243	developmental process	0	1	prmt5
DDB_G0287427	GO:0032502	39.2823	1.63722	0.00114243	developmental process	0	1	DDB_G0287427
DDB_G0287459	GO:0032502	39.2823	1.63722	0.00114243	developmental process	1	1	secG
DDB_G0287505	GO:0032502	39.2823	1.63722	0.00114243	developmental process	0	1	talB
DDB_G0287583	GO:0032502	39.2823	1.63722	0.00114243	developmental process	0	1	gerC
DDB_G0287585	GO:0032502	39.2823	1.63722	0.00114243	developmental process	0	1	rgaA
DDB_G0287587	GO:0032502	39.2823	1.63722	0.00114243	developmental process	0	1	smlA
DDB_G0287593	GO:0032502	39.2823	1.63722	0.00114243	developmental process	0	1	abcC6
DDB_G0287687	GO:0032502	39.2823	1.63722	0.00114243	developmental process	0	1	gerB
DDB_G0287691	GO:0032502	39.2823	1.63722	0.00114243	developmental process	0	1	abcC3
DDB_G0287855	GO:0032502	39.2823	1.63722	0.00114243	developmental process	0	1	pirA
DDB_G0287969	GO:0032502	39.2823	1.63722	0.00114243	developmental process	0	1	cnrN
DDB_G0288047	GO:0032502	39.2823	1.63722	0.00114243	developmental process	1	1	dnmA
DDB_G0288249	GO:0032502	39.2823	1.63722	0.00114243	developmental process	1	1	mkpA
DDB_G0288251	GO:0032502	39.2823	1.63722	0.00114243	developmental process	0	1	roco4
DDB_G0288331	GO:0032502	39.2823	1.63722	0.00114243	developmental process	0	1	expl7
DDB_G0288375	GO:0032502	39.2823	1.63722	0.00114243	developmental process	0	1	lis1
DDB_G0288485	GO:0032502	39.2823	1.63722	0.00114243	developmental process	0	1	pikD
DDB_G0288495	GO:0032502	39.2823	1.63722	0.00114243	developmental process	0	1	smdA
DDB_G0288511	GO:0032502	39.2823	1.63722	0.00114243	developmental process	0	1	sadA
DDB_G0288581	GO:0032502	39.2823	1.63722	0.00114243	developmental process	0	1	DDB_G0288581
DDB_G0288715	GO:0032502	39.2823	1.63722	0.00114243	developmental process	0	1	gadB
DDB_G0288755	GO:0032502	39.2823	1.63722	0.00114243	developmental process	1	1	gbfA
DDB_G0288769	GO:0032502	39.2823	1.63722	0.00114243	developmental process	0	1	cap
DDB_G0288771	GO:0032502	39.2823	1.63722	0.00114243	developmental process	0	1	darA
DDB_G0288877	GO:0032502	39.2823	1.63722	0.00114243	developmental process	0	1	aarA
DDB_G0288975	GO:0032502	39.2823	1.63722	0.00114243	developmental process	1	1	hbx13
DDB_G0289001	GO:0032502	39.2823	1.63722	0.00114243	developmental process	0	1	pyk3
DDB_G0289005	GO:0032502	39.2823	1.63722	0.00114243	developmental process	0	1	act4
DDB_G0289073	GO:0032502	39.2823	1.63722	0.00114243	developmental process	0	1	csaA
DDB_G0289121	GO:0032502	39.2823	1.63722	0.00114243	developmental process	0	1	pde4
DDB_G0289257	GO:0032502	39.2823	1.63722	0.00114243	developmental process	0	1	set1
DDB_G0289329	GO:0032502	39.2823	1.63722	0.00114243	developmental process	1	1	dmtA
DDB_G0289331	GO:0032502	39.2823	1.63722	0.00114243	developmental process	0	1	abcG16
DDB_G0289377	GO:0032502	39.2823	1.63722	0.00114243	developmental process	0	1	DDB_G0289377
DDB_G0289389	GO:0032502	39.2823	1.63722	0.00114243	developmental process	0	1	dtfA
DDB_G0289521	GO:0032502	39.2823	1.63722	0.00114243	developmental process	0	1	srsA
DDB_G0289553	GO:0032502	39.2823	1.63722	0.00114243	developmental process	0	1	act1
DDB_G0289555	GO:0032502	39.2823	1.63722	0.00114243	developmental process	0	1	arkA
DDB_G0289653	GO:0032502	39.2823	1.63722	0.00114243	developmental process	0	1	noxA
DDB_G0289655	GO:0032502	39.2823	1.63722	0.00114243	developmental process	0	1	abcG7
DDB_G0289665	GO:0032502	39.2823	1.63722	0.00114243	developmental process	0	1	gefQ
DDB_G0289811	GO:0032502	39.2823	1.63722	0.00114243	developmental process	0	1	act10
DDB_G0290015	GO:0032502	39.2823	1.63722	0.00114243	developmental process	1	1	grxA
DDB_G0290079	GO:0032502	39.2823	1.63722	0.00114243	developmental process	1	1	pgtB
DDB_G0290165	GO:0032502	39.2823	1.63722	0.00114243	developmental process	0	1	bzpR
DDB_G0290453	GO:0032502	39.2823	1.63722	0.00114243	developmental process	1	1	usp12
DDB_G0290481	GO:0032502	39.2823	1.63722	0.00114243	developmental process	0	1	talA
DDB_G0290551	GO:0032502	39.2823	1.63722	0.00114243	developmental process	0	1	rblA
DDB_G0290825	GO:0032502	39.2823	1.63722	0.00114243	developmental process	0	1	chlA
DDB_G0290835	GO:0032502	39.2823	1.63722	0.00114243	developmental process	0	1	DDB_G0290835
DDB_G0290853	GO:0032502	39.2823	1.63722	0.00114243	developmental process	1	1	stlB
DDB_G0291075	GO:0032502	39.2823	1.63722	0.00114243	developmental process	0	1	warA
DDB_G0291117	GO:0032502	39.2823	1.63722	0.00114243	developmental process	0	1	noxC
DDB_G0291157	GO:0032502	39.2823	1.63722	0.00114243	developmental process	0	1	cln3
DDB_G0291197	GO:0032502	39.2823	1.63722	0.00114243	developmental process	0	1	hbx3
DDB_G0291227	GO:0032502	39.2823	1.63722	0.00114243	developmental process	0	1	ctrA
DDB_G0291245	GO:0032502	39.2823	1.63722	0.00114243	developmental process	0	1	abcA6
DDB_G0291253	GO:0032502	39.2823	1.63722	0.00114243	developmental process	0	1	dia2
DDB_G0291303	GO:0032502	39.2823	1.63722	0.00114243	developmental process	0	1	frmA
DDB_G0291342	GO:0032502	39.2823	1.63722	0.00114243	developmental process	0	1	tacA
DDB_G0291352	GO:0032502	39.2823	1.63722	0.00114243	developmental process	0	1	psenA
DDB_G0291356	GO:0032502	39.2823	1.63722	0.00114243	developmental process	0	1	grlE
DDB_G0291372	GO:0032502	39.2823	1.63722	0.00114243	developmental process	0	1	dimB
DDB_G0291454	GO:0032502	39.2823	1.63722	0.00114243	developmental process	0	1	tgrC4
DDB_G0291512	GO:0032502	39.2823	1.63722	0.00114243	developmental process	0	1	epnA
DDB_G0291556	GO:0032502	39.2823	1.63722	0.00114243	developmental process	0	1	prmt1
DDB_G0291714	GO:0032502	39.2823	1.63722	0.00114243	developmental process	1	1	abcB3
DDB_G0291788	GO:0032502	39.2823	1.63722	0.00114243	developmental process	0	1	adprt3
DDB_G0291926	GO:0032502	39.2823	1.63722	0.00114243	developmental process	0	1	DDB_G0291926
DDB_G0291972	GO:0032502	39.2823	1.63722	0.00114243	developmental process	0	1	culA
DDB_G0291980	GO:0032502	39.2823	1.63722	0.00114243	developmental process	1	1	abcA9
DDB_G0291982	GO:0032502	39.2823	1.63722	0.00114243	developmental process	0	1	psiA
DDB_G0292162	GO:0032502	39.2823	1.63722	0.00114243	developmental process	1	1	DDB_G0292162
DDB_G0292206	GO:0032502	39.2823	1.63722	0.00114243	developmental process	0	1	manA
DDB_G0292260	GO:0032502	39.2823	1.63722	0.00114243	developmental process	0	1	DDB_G0292260_RTE
DDB_G0292266	GO:0032502	39.2823	1.63722	0.00114243	developmental process	0	1	amdA
DDB_G0292268	GO:0032502	39.2823	1.63722	0.00114243	developmental process	0	1	rab2A
DDB_G0292270	GO:0032502	39.2823	1.63722	0.00114243	developmental process	0	1	comG
DDB_G0292310	GO:0032502	39.2823	1.63722	0.00114243	developmental process	0	1	psenB
DDB_G0292390	GO:0032502	39.2823	1.63722	0.00114243	developmental process	0	1	atg1
DDB_G0292436	GO:0032502	39.2823	1.63722	0.00114243	developmental process	0	1	triA
DDB_G0292562	GO:0032502	39.2823	1.63722	0.00114243	developmental process	1	1	tgrQ1
DDB_G0292564	GO:0032502	39.2823	1.63722	0.00114243	developmental process	0	1	iplA
DDB_G0292592	GO:0032502	39.2823	1.63722	0.00114243	developmental process	0	1	lst8
DDB_G0292736	GO:0032502	39.2823	1.63722	0.00114243	developmental process	0	1	plc
DDB_G0292986	GO:0032502	39.2823	1.63722	0.00114243	developmental process	0	1	abcG10
DDB_G0293002	GO:0032502	39.2823	1.63722	0.00114243	developmental process	0	1	tagA
DDB_G0293008	GO:0032502	39.2823	1.63722	0.00114243	developmental process	0	1	cpnA
DDB_G0293012	GO:0032502	39.2823	1.63722	0.00114243	developmental process	0	1	chdC
DDB_G0293084	GO:0032502	39.2823	1.63722	0.00114243	developmental process	0	1	zizB
DDB_G0293192	GO:0032502	39.2823	1.63722	0.00114243	developmental process	0	1	DG1098
DDB_G0293194	GO:0032502	39.2823	1.63722	0.00114243	developmental process	0	1	abcD2
DDB_G0293236	GO:0032502	39.2823	1.63722	0.00114243	developmental process	0	1	DDB_G0293236
DDB_G0293248	GO:0032502	39.2823	1.63722	0.00114243	developmental process	0	1	grpA
DDB_G0293302	GO:0032502	39.2823	1.63722	0.00114243	developmental process	0	1	DDB_G0293302
DDB_G0293416	GO:0032502	39.2823	1.63722	0.00114243	developmental process	0	1	abcB1
DDB_G0293436	GO:0032502	39.2823	1.63722	0.00114243	developmental process	0	1	abcA3
DDB_G0293522	GO:0032502	39.2823	1.63722	0.00114243	developmental process	0	1	ponA
DDB_G0293524	GO:0032502	39.2823	1.63722	0.00114243	developmental process	0	1	ppk1
DDB_G0293530	GO:0032502	39.2823	1.63722	0.00114243	developmental process	1	1	pefB
DDB_G0293532	GO:0032502	39.2823	1.63722	0.00114243	developmental process	0	1	dstC
DDB_G0293544	GO:0032502	39.2823	1.63722	0.00114243	developmental process	0	1	cepK
DDB_G0293850	GO:0032502	39.2823	1.63722	0.00114243	developmental process	0	1	alrA
DDB_G0293904	GO:0032502	39.2823	1.63722	0.00114243	developmental process	0	1	redA
DDB_G0294046	GO:0032502	39.2823	1.63722	0.00114243	developmental process	0	1	mrps4
DDB_G0294407	GO:0032502	39.2823	1.63722	0.00114243	developmental process	0	1	helF
DDB_G0294473	GO:0032502	39.2823	1.63722	0.00114243	developmental process	0	1	staA
DDB_G0294515	GO:0032502	39.2823	1.63722	0.00114243	developmental process	1	1	dutA
DDB_G0294533	GO:0032502	39.2823	1.63722	0.00114243	developmental process	0	1	roco5
DDB_G0286183	GO:0018904	0.616999	17.5844	0.00139952	ether metabolic process	0	1	agps
DDB_G0288595	GO:0018904	0.616999	17.5844	0.00139952	ether metabolic process	1	1	DDB_G0288595
DDB_G0289329	GO:0018904	0.616999	17.5844	0.00139952	ether metabolic process	1	1	dmtA
DDB_G0290825	GO:0018904	0.616999	17.5844	0.00139952	ether metabolic process	0	1	chlA
DDB_G0290853	GO:0018904	0.616999	17.5844	0.00139952	ether metabolic process	1	1	stlB
DDB_G0294489	GO:0018904	0.616999	17.5844	0.00139952	ether metabolic process	1	1	trxC
DDB_G0267376	GO:0006950	53.4732	1.52718	0.00158771	response to stress	0	1	acrA
DDB_G0267384	GO:0006950	53.4732	1.52718	0.00158771	response to stress	1	1	culB
DDB_G0267386	GO:0006950	53.4732	1.52718	0.00158771	response to stress	0	1	cysB
DDB_G0267400	GO:0006950	53.4732	1.52718	0.00158771	response to stress	0	1	hspD
DDB_G0267414	GO:0006950	53.4732	1.52718	0.00158771	response to stress	0	1	repD
DDB_G0267422	GO:0006950	53.4732	1.52718	0.00158771	response to stress	0	1	tipC
DDB_G0267424	GO:0006950	53.4732	1.52718	0.00158771	response to stress	1	1	amtC
DDB_G0267426	GO:0006950	53.4732	1.52718	0.00158771	response to stress	0	1	cshA
DDB_G0267432	GO:0006950	53.4732	1.52718	0.00158771	response to stress	0	1	abcG15
DDB_G0267436	GO:0006950	53.4732	1.52718	0.00158771	response to stress	0	1	abcF4
DDB_G0267444	GO:0006950	53.4732	1.52718	0.00158771	response to stress	0	1	phg1A
DDB_G0267460	GO:0006950	53.4732	1.52718	0.00158771	response to stress	0	1	cybA
DDB_G0267462	GO:0006950	53.4732	1.52718	0.00158771	response to stress	0	1	Dd5P4
DDB_G0267470	GO:0006950	53.4732	1.52718	0.00158771	response to stress	0	1	dicB
DDB_G0267630	GO:0006950	53.4732	1.52718	0.00158771	response to stress	0	1	kil1
DDB_G0267674	GO:0006950	53.4732	1.52718	0.00158771	response to stress	0	1	glcS
DDB_G0267682	GO:0006950	53.4732	1.52718	0.00158771	response to stress	0	1	ercc1
DDB_G0267748	GO:0006950	53.4732	1.52718	0.00158771	response to stress	0	1	cdc45
DDB_G0267924	GO:0006950	53.4732	1.52718	0.00158771	response to stress	0	1	DDB_G0267924
DDB_G0267952	GO:0006950	53.4732	1.52718	0.00158771	response to stress	0	1	DDB_G0267952
DDB_G0267962	GO:0006950	53.4732	1.52718	0.00158771	response to stress	0	1	tsuA
DDB_G0268014	GO:0006950	53.4732	1.52718	0.00158771	response to stress	0	1	gtf2h1
DDB_G0268144	GO:0006950	53.4732	1.52718	0.00158771	response to stress	0	1	vwkA
DDB_G0268168	GO:0006950	53.4732	1.52718	0.00158771	response to stress	1	1	png
DDB_G0268216	GO:0006950	53.4732	1.52718	0.00158771	response to stress	0	1	fncD2
DDB_G0268266	GO:0006950	53.4732	1.52718	0.00158771	response to stress	0	1	DDB_G0268266
DDB_G0268306	GO:0006950	53.4732	1.52718	0.00158771	response to stress	0	1	rpb9
DDB_G0268446	GO:0006950	53.4732	1.52718	0.00158771	response to stress	0	1	cbhA
DDB_G0268512	GO:0006950	53.4732	1.52718	0.00158771	response to stress	0	1	wrn
DDB_G0268578	GO:0006950	53.4732	1.52718	0.00158771	response to stress	1	1	gefV
DDB_G0268614	GO:0006950	53.4732	1.52718	0.00158771	response to stress	0	1	msh6
DDB_G0268636	GO:0006950	53.4732	1.52718	0.00158771	response to stress	0	1	roco11
DDB_G0268920	GO:0006950	53.4732	1.52718	0.00158771	response to stress	0	1	mef2A
DDB_G0269100	GO:0006950	53.4732	1.52718	0.00158771	response to stress	1	1	abpC
DDB_G0269108	GO:0006950	53.4732	1.52718	0.00158771	response to stress	0	1	catB
DDB_G0269124	GO:0006950	53.4732	1.52718	0.00158771	response to stress	0	1	dcsA
DDB_G0269130	GO:0006950	53.4732	1.52718	0.00158771	response to stress	1	1	phgA
DDB_G0269140	GO:0006950	53.4732	1.52718	0.00158771	response to stress	0	1	gapA
DDB_G0269152	GO:0006950	53.4732	1.52718	0.00158771	response to stress	0	1	mekA
DDB_G0269154	GO:0006950	53.4732	1.52718	0.00158771	response to stress	0	1	modA
DDB_G0269160	GO:0006950	53.4732	1.52718	0.00158771	response to stress	0	1	nxnA
DDB_G0269166	GO:0006950	53.4732	1.52718	0.00158771	response to stress	1	1	pakA
DDB_G0269184	GO:0006950	53.4732	1.52718	0.00158771	response to stress	0	1	rzpA
DDB_G0269206	GO:0006950	53.4732	1.52718	0.00158771	response to stress	0	1	abcG21
DDB_G0269222	GO:0006950	53.4732	1.52718	0.00158771	response to stress	0	1	gefB
DDB_G0269234	GO:0006950	53.4732	1.52718	0.00158771	response to stress	0	1	act8
DDB_G0269240	GO:0006950	53.4732	1.52718	0.00158771	response to stress	0	1	racH
DDB_G0269244	GO:0006950	53.4732	1.52718	0.00158771	response to stress	0	1	atg6A
DDB_G0269248	GO:0006950	53.4732	1.52718	0.00158771	response to stress	0	1	cf45-1
DDB_G0269254	GO:0006950	53.4732	1.52718	0.00158771	response to stress	1	1	sigJ
DDB_G0269364	GO:0006950	53.4732	1.52718	0.00158771	response to stress	0	1	stlA
DDB_G0269378	GO:0006950	53.4732	1.52718	0.00158771	response to stress	0	1	rad1
DDB_G0269418	GO:0006950	53.4732	1.52718	0.00158771	response to stress	0	1	DDB_G0269418
DDB_G0269610	GO:0006950	53.4732	1.52718	0.00158771	response to stress	0	1	gxcT
DDB_G0269696	GO:0006950	53.4732	1.52718	0.00158771	response to stress	0	1	pakD
DDB_G0269914	GO:0006950	53.4732	1.52718	0.00158771	response to stress	0	1	tpp1
DDB_G0269966	GO:0006950	53.4732	1.52718	0.00158771	response to stress	0	1	ddx1
DDB_G0270024	GO:0006950	53.4732	1.52718	0.00158771	response to stress	0	1	mgp2
DDB_G0270098	GO:0006950	53.4732	1.52718	0.00158771	response to stress	0	1	sqstm1
DDB_G0270428	GO:0006950	53.4732	1.52718	0.00158771	response to stress	0	1	DDB_G0270428
DDB_G0270434	GO:0006950	53.4732	1.52718	0.00158771	response to stress	0	1	med23
DDB_G0270658	GO:0006950	53.4732	1.52718	0.00158771	response to stress	0	1	acbA
DDB_G0270756	GO:0006950	53.4732	1.52718	0.00158771	response to stress	0	1	gtaG
DDB_G0270764	GO:0006950	53.4732	1.52718	0.00158771	response to stress	0	1	myh
DDB_G0270994	GO:0006950	53.4732	1.52718	0.00158771	response to stress	1	1	psaA
DDB_G0271022	GO:0006950	53.4732	1.52718	0.00158771	response to stress	0	1	adcC
DDB_G0271050	GO:0006950	53.4732	1.52718	0.00158771	response to stress	0	1	magA
DDB_G0271096	GO:0006950	53.4732	1.52718	0.00158771	response to stress	0	1	atg7
DDB_G0271140	GO:0006950	53.4732	1.52718	0.00158771	response to stress	0	1	abcA7
DDB_G0271346	GO:0006950	53.4732	1.52718	0.00158771	response to stress	1	1	yod1
DDB_G0271500	GO:0006950	53.4732	1.52718	0.00158771	response to stress	1	1	keaA
DDB_G0271502	GO:0006950	53.4732	1.52718	0.00158771	response to stress	0	1	lvsD
DDB_G0271504	GO:0006950	53.4732	1.52718	0.00158771	response to stress	1	1	lvsB
DDB_G0271586	GO:0006950	53.4732	1.52718	0.00158771	response to stress	0	1	tgrK1
DDB_G0271598	GO:0006950	53.4732	1.52718	0.00158771	response to stress	0	1	tgrS1
DDB_G0271608	GO:0006950	53.4732	1.52718	0.00158771	response to stress	0	1	rev3
DDB_G0271626	GO:0006950	53.4732	1.52718	0.00158771	response to stress	1	1	dotA
DDB_G0271646	GO:0006950	53.4732	1.52718	0.00158771	response to stress	0	1	tgrK2
DDB_G0271654	GO:0006950	53.4732	1.52718	0.00158771	response to stress	0	1	tgrK3
DDB_G0271684	GO:0006950	53.4732	1.52718	0.00158771	response to stress	0	1	grlA
DDB_G0271700	GO:0006950	53.4732	1.52718	0.00158771	response to stress	1	1	DDB_G0271700
DDB_G0271852	GO:0006950	53.4732	1.52718	0.00158771	response to stress	0	1	rtaA
DDB_G0271958	GO:0006950	53.4732	1.52718	0.00158771	response to stress	0	1	DDB_G0271958
DDB_G0271980	GO:0006950	53.4732	1.52718	0.00158771	response to stress	0	1	rabR
DDB_G0272002	GO:0006950	53.4732	1.52718	0.00158771	response to stress	0	1	egeA
DDB_G0272004	GO:0006950	53.4732	1.52718	0.00158771	response to stress	0	1	p2xA
DDB_G0272038	GO:0006950	53.4732	1.52718	0.00158771	response to stress	0	1	rgfA
DDB_G0272106	GO:0006950	53.4732	1.52718	0.00158771	response to stress	0	1	arpB
DDB_G0272116	GO:0006950	53.4732	1.52718	0.00158771	response to stress	0	1	ppp4c
DDB_G0272150	GO:0006950	53.4732	1.52718	0.00158771	response to stress	0	1	grlJ
DDB_G0272158	GO:0006950	53.4732	1.52718	0.00158771	response to stress	1	1	wrnip1
DDB_G0272208	GO:0006950	53.4732	1.52718	0.00158771	response to stress	0	1	idhC
DDB_G0272242	GO:0006950	53.4732	1.52718	0.00158771	response to stress	0	1	cupI
DDB_G0272248	GO:0006950	53.4732	1.52718	0.00158771	response to stress	0	1	act16
DDB_G0272344	GO:0006950	53.4732	1.52718	0.00158771	response to stress	0	1	htt
DDB_G0272484	GO:0006950	53.4732	1.52718	0.00158771	response to stress	1	1	DDB_G0272484
DDB_G0272684	GO:0006950	53.4732	1.52718	0.00158771	response to stress	0	1	qdpr
DDB_G0272754	GO:0006950	53.4732	1.52718	0.00158771	response to stress	0	1	gsr
DDB_G0272783	GO:0006950	53.4732	1.52718	0.00158771	response to stress	0	1	rliA
DDB_G0272837	GO:0006950	53.4732	1.52718	0.00158771	response to stress	0	1	ifkA
DDB_G0272839	GO:0006950	53.4732	1.52718	0.00158771	response to stress	0	1	DDB_G0272839
DDB_G0272861	GO:0006950	53.4732	1.52718	0.00158771	response to stress	0	1	cosA
DDB_G0272949	GO:0006950	53.4732	1.52718	0.00158771	response to stress	0	1	DDB_G0272949
DDB_G0272999	GO:0006950	53.4732	1.52718	0.00158771	response to stress	0	1	pkd2
DDB_G0273013	GO:0006950	53.4732	1.52718	0.00158771	response to stress	0	1	uglB
DDB_G0274101	GO:0006950	53.4732	1.52718	0.00158771	response to stress	1	1	dokA
DDB_G0274103	GO:0006950	53.4732	1.52718	0.00158771	response to stress	0	1	ggtA
DDB_G0274107	GO:0006950	53.4732	1.52718	0.00158771	response to stress	0	1	sfbA
DDB_G0274119	GO:0006950	53.4732	1.52718	0.00158771	response to stress	0	1	abcA5
DDB_G0274121	GO:0006950	53.4732	1.52718	0.00158771	response to stress	1	1	abcA4
DDB_G0274135	GO:0006950	53.4732	1.52718	0.00158771	response to stress	0	1	act6
DDB_G0274139	GO:0006950	53.4732	1.52718	0.00158771	response to stress	0	1	cycC
DDB_G0274177	GO:0006950	53.4732	1.52718	0.00158771	response to stress	0	1	DDB_G0274177
DDB_G0274181	GO:0006950	53.4732	1.52718	0.00158771	response to stress	0	1	DDB_G0274181
DDB_G0274191	GO:0006950	53.4732	1.52718	0.00158771	response to stress	0	1	dhkC
DDB_G0274383	GO:0006950	53.4732	1.52718	0.00158771	response to stress	0	1	pdeD
DDB_G0274395	GO:0006950	53.4732	1.52718	0.00158771	response to stress	0	1	adcB
DDB_G0274493	GO:0006950	53.4732	1.52718	0.00158771	response to stress	0	1	lig1
DDB_G0274519	GO:0006950	53.4732	1.52718	0.00158771	response to stress	0	1	napA
DDB_G0274569	GO:0006950	53.4732	1.52718	0.00158771	response to stress	0	1	acgA
DDB_G0274577	GO:0006950	53.4732	1.52718	0.00158771	response to stress	1	1	DG1124
DDB_G0274595	GO:0006950	53.4732	1.52718	0.00158771	response to stress	0	1	catA
DDB_G0274597	GO:0006950	53.4732	1.52718	0.00158771	response to stress	0	1	ctnA
DDB_G0274741	GO:0006950	53.4732	1.52718	0.00158771	response to stress	0	1	gnt15
DDB_G0274757	GO:0006950	53.4732	1.52718	0.00158771	response to stress	0	1	DDB_G0274757
DDB_G0274805	GO:0006950	53.4732	1.52718	0.00158771	response to stress	0	1	ibrA
DDB_G0274841	GO:0006950	53.4732	1.52718	0.00158771	response to stress	0	1	fncM
DDB_G0274901	GO:0006950	53.4732	1.52718	0.00158771	response to stress	0	1	DDB_G0274901
DDB_G0275025	GO:0006950	53.4732	1.52718	0.00158771	response to stress	1	1	DDB_G0275025
DDB_G0275045	GO:0006950	53.4732	1.52718	0.00158771	response to stress	0	1	gpbB
DDB_G0275065	GO:0006950	53.4732	1.52718	0.00158771	response to stress	0	1	dmpA
DDB_G0275077	GO:0006950	53.4732	1.52718	0.00158771	response to stress	0	1	pks17
DDB_G0275095	GO:0006950	53.4732	1.52718	0.00158771	response to stress	0	1	mgmt
DDB_G0275119	GO:0006950	53.4732	1.52718	0.00158771	response to stress	0	1	alyB
DDB_G0275121	GO:0006950	53.4732	1.52718	0.00158771	response to stress	0	1	alyC
DDB_G0275123	GO:0006950	53.4732	1.52718	0.00158771	response to stress	0	1	alyA
DDB_G0275311	GO:0006950	53.4732	1.52718	0.00158771	response to stress	0	1	DDB_G0275311
DDB_G0275437	GO:0006950	53.4732	1.52718	0.00158771	response to stress	0	1	7E
DDB_G0275451	GO:0006950	53.4732	1.52718	0.00158771	response to stress	1	1	alxA
DDB_G0275469	GO:0006950	53.4732	1.52718	0.00158771	response to stress	0	1	DDB_G0275469
DDB_G0275517	GO:0006950	53.4732	1.52718	0.00158771	response to stress	0	1	gtf2h3
DDB_G0275635	GO:0006950	53.4732	1.52718	0.00158771	response to stress	0	1	pik6
DDB_G0275653	GO:0006950	53.4732	1.52718	0.00158771	response to stress	1	1	xrcc1
DDB_G0275687	GO:0006950	53.4732	1.52718	0.00158771	response to stress	1	1	abcG18
DDB_G0275689	GO:0006950	53.4732	1.52718	0.00158771	response to stress	0	1	abcG2
DDB_G0275695	GO:0006950	53.4732	1.52718	0.00158771	response to stress	0	1	ampA
DDB_G0275697	GO:0006950	53.4732	1.52718	0.00158771	response to stress	0	1	abcH3
DDB_G0275747	GO:0006950	53.4732	1.52718	0.00158771	response to stress	0	1	DDB_G0275747
DDB_G0275787	GO:0006950	53.4732	1.52718	0.00158771	response to stress	0	1	rad6
DDB_G0275809	GO:0006950	53.4732	1.52718	0.00158771	response to stress	0	1	msh2
DDB_G0275815	GO:0006950	53.4732	1.52718	0.00158771	response to stress	0	1	nrampB
DDB_G0275845	GO:0006950	53.4732	1.52718	0.00158771	response to stress	0	1	smg1
DDB_G0275931	GO:0006950	53.4732	1.52718	0.00158771	response to stress	0	1	ncsA
DDB_G0275999	GO:0006950	53.4732	1.52718	0.00158771	response to stress	0	1	msh1
DDB_G0276025	GO:0006950	53.4732	1.52718	0.00158771	response to stress	0	1	zakA
DDB_G0276073	GO:0006950	53.4732	1.52718	0.00158771	response to stress	0	1	recA
DDB_G0276077	GO:0006950	53.4732	1.52718	0.00158771	response to stress	0	1	mlcR
DDB_G0276101	GO:0006950	53.4732	1.52718	0.00158771	response to stress	0	1	smc3
DDB_G0276141	GO:0006950	53.4732	1.52718	0.00158771	response to stress	0	1	pdi1
DDB_G0276143	GO:0006950	53.4732	1.52718	0.00158771	response to stress	1	1	dhkF
DDB_G0276251	GO:0006950	53.4732	1.52718	0.00158771	response to stress	1	1	DDB_G0276251
DDB_G0276267	GO:0006950	53.4732	1.52718	0.00158771	response to stress	0	1	gpaB
DDB_G0276333	GO:0006950	53.4732	1.52718	0.00158771	response to stress	0	1	tipB
DDB_G0276363	GO:0006950	53.4732	1.52718	0.00158771	response to stress	0	1	myoG
DDB_G0276371	GO:0006950	53.4732	1.52718	0.00158771	response to stress	0	1	gefL
DDB_G0276399	GO:0006950	53.4732	1.52718	0.00158771	response to stress	0	1	rab8B
DDB_G0276439	GO:0006950	53.4732	1.52718	0.00158771	response to stress	0	1	DDB_G0276439
DDB_G0276465	GO:0006950	53.4732	1.52718	0.00158771	response to stress	0	1	sepA
DDB_G0276481	GO:0006950	53.4732	1.52718	0.00158771	response to stress	0	1	ercc8
DDB_G0276519	GO:0006950	53.4732	1.52718	0.00158771	response to stress	1	1	mus81
DDB_G0276579	GO:0006950	53.4732	1.52718	0.00158771	response to stress	0	1	msrA
DDB_G0276883	GO:0006950	53.4732	1.52718	0.00158771	response to stress	1	1	canA
DDB_G0276887	GO:0006950	53.4732	1.52718	0.00158771	response to stress	0	1	fbxA
DDB_G0277001	GO:0006950	53.4732	1.52718	0.00158771	response to stress	0	1	cpiC
DDB_G0277059	GO:0006950	53.4732	1.52718	0.00158771	response to stress	0	1	DDB_G0277059
DDB_G0277071	GO:0006950	53.4732	1.52718	0.00158771	response to stress	0	1	dupA
DDB_G0277075	GO:0006950	53.4732	1.52718	0.00158771	response to stress	0	1	detA
DDB_G0277141	GO:0006950	53.4732	1.52718	0.00158771	response to stress	0	1	cotC
DDB_G0277143	GO:0006950	53.4732	1.52718	0.00158771	response to stress	0	1	gpbA
DDB_G0277165	GO:0006950	53.4732	1.52718	0.00158771	response to stress	0	1	DDB_G0277165
DDB_G0277221	GO:0006950	53.4732	1.52718	0.00158771	response to stress	0	1	chcA
DDB_G0277247	GO:0006950	53.4732	1.52718	0.00158771	response to stress	1	1	apnB
DDB_G0277273	GO:0006950	53.4732	1.52718	0.00158771	response to stress	0	1	phg1B
DDB_G0277275	GO:0006950	53.4732	1.52718	0.00158771	response to stress	0	1	poxA
DDB_G0277307	GO:0006950	53.4732	1.52718	0.00158771	response to stress	0	1	DDB_G0277307
DDB_G0277319	GO:0006950	53.4732	1.52718	0.00158771	response to stress	0	1	atg3
DDB_G0277349	GO:0006950	53.4732	1.52718	0.00158771	response to stress	0	1	DDB_G0277349
DDB_G0277399	GO:0006950	53.4732	1.52718	0.00158771	response to stress	0	1	piaA
DDB_G0277403	GO:0006950	53.4732	1.52718	0.00158771	response to stress	0	1	clc
DDB_G0277419	GO:0006950	53.4732	1.52718	0.00158771	response to stress	1	1	DDB_G0277419
DDB_G0277501	GO:0006950	53.4732	1.52718	0.00158771	response to stress	0	1	capB
DDB_G0277503	GO:0006950	53.4732	1.52718	0.00158771	response to stress	0	1	amtA
DDB_G0277589	GO:0006950	53.4732	1.52718	0.00158771	response to stress	0	1	gtaC
DDB_G0277667	GO:0006950	53.4732	1.52718	0.00158771	response to stress	0	1	DDB_G0277667
DDB_G0277755	GO:0006950	53.4732	1.52718	0.00158771	response to stress	0	1	dclre1
DDB_G0277787	GO:0006950	53.4732	1.52718	0.00158771	response to stress	0	1	DDB_G0277787
DDB_G0277829	GO:0006950	53.4732	1.52718	0.00158771	response to stress	0	1	carC
DDB_G0277831	GO:0006950	53.4732	1.52718	0.00158771	response to stress	0	1	carD
DDB_G0277843	GO:0006950	53.4732	1.52718	0.00158771	response to stress	1	1	scaA
DDB_G0277845	GO:0006950	53.4732	1.52718	0.00158771	response to stress	0	1	dhkB
DDB_G0277851	GO:0006950	53.4732	1.52718	0.00158771	response to stress	0	1	dymB
DDB_G0277859	GO:0006950	53.4732	1.52718	0.00158771	response to stress	0	1	mlcE
DDB_G0277865	GO:0006950	53.4732	1.52718	0.00158771	response to stress	1	1	ptpB
DDB_G0277871	GO:0006950	53.4732	1.52718	0.00158771	response to stress	0	1	rsc12
DDB_G0277877	GO:0006950	53.4732	1.52718	0.00158771	response to stress	0	1	uglA
DDB_G0277881	GO:0006950	53.4732	1.52718	0.00158771	response to stress	0	1	limC
DDB_G0277883	GO:0006950	53.4732	1.52718	0.00158771	response to stress	0	1	dhkJ
DDB_G0277887	GO:0006950	53.4732	1.52718	0.00158771	response to stress	0	1	dhkK
DDB_G0277901	GO:0006950	53.4732	1.52718	0.00158771	response to stress	0	1	apm3
DDB_G0277925	GO:0006950	53.4732	1.52718	0.00158771	response to stress	0	1	pif1
DDB_G0277959	GO:0006950	53.4732	1.52718	0.00158771	response to stress	0	1	cupJ
DDB_G0277977	GO:0006950	53.4732	1.52718	0.00158771	response to stress	0	1	xab2
DDB_G0277987	GO:0006950	53.4732	1.52718	0.00158771	response to stress	0	1	gxcA
DDB_G0278051	GO:0006950	53.4732	1.52718	0.00158771	response to stress	0	1	elmoA
DDB_G0278333	GO:0006950	53.4732	1.52718	0.00158771	response to stress	0	1	DDB_G0278333
DDB_G0278367	GO:0006950	53.4732	1.52718	0.00158771	response to stress	0	1	DDB_G0278367
DDB_G0278525	GO:0006950	53.4732	1.52718	0.00158771	response to stress	0	1	plaA
DDB_G0278639	GO:0006950	53.4732	1.52718	0.00158771	response to stress	0	1	clcD
DDB_G0278727	GO:0006950	53.4732	1.52718	0.00158771	response to stress	0	1	pikA
DDB_G0278729	GO:0006950	53.4732	1.52718	0.00158771	response to stress	0	1	repB
DDB_G0278741	GO:0006950	53.4732	1.52718	0.00158771	response to stress	0	1	adprt1A
DDB_G0278869	GO:0006950	53.4732	1.52718	0.00158771	response to stress	1	1	DDB_G0278869
DDB_G0278935	GO:0006950	53.4732	1.52718	0.00158771	response to stress	0	1	rad18
DDB_G0278945	GO:0006950	53.4732	1.52718	0.00158771	response to stress	1	1	DDB_G0278945
DDB_G0278971	GO:0006950	53.4732	1.52718	0.00158771	response to stress	0	1	dimA
DDB_G0278979	GO:0006950	53.4732	1.52718	0.00158771	response to stress	0	1	DDB_G0278979
DDB_G0279183	GO:0006950	53.4732	1.52718	0.00158771	response to stress	0	1	kil2
DDB_G0279195	GO:0006950	53.4732	1.52718	0.00158771	response to stress	0	1	adprt1B
DDB_G0279311	GO:0006950	53.4732	1.52718	0.00158771	response to stress	0	1	cdc5l
DDB_G0279373	GO:0006950	53.4732	1.52718	0.00158771	response to stress	0	1	snf5
DDB_G0279427	GO:0006950	53.4732	1.52718	0.00158771	response to stress	0	1	DDB_G0279427
DDB_G0279483	GO:0006950	53.4732	1.52718	0.00158771	response to stress	0	1	pldB
DDB_G0279629	GO:0006950	53.4732	1.52718	0.00158771	response to stress	0	1	lkb1
DDB_G0279669	GO:0006950	53.4732	1.52718	0.00158771	response to stress	0	1	fncE
DDB_G0279733	GO:0006950	53.4732	1.52718	0.00158771	response to stress	1	1	gxcDD
DDB_G0279797	GO:0006950	53.4732	1.52718	0.00158771	response to stress	1	1	ctnB
DDB_G0279915	GO:0006950	53.4732	1.52718	0.00158771	response to stress	0	1	abcB4
DDB_G0279923	GO:0006950	53.4732	1.52718	0.00158771	response to stress	0	1	apnA
DDB_G0279945	GO:0006950	53.4732	1.52718	0.00158771	response to stress	0	1	DDB_G0279945
DDB_G0280037	GO:0006950	53.4732	1.52718	0.00158771	response to stress	0	1	ddj1
DDB_G0280043	GO:0006950	53.4732	1.52718	0.00158771	response to stress	0	1	rab8A
DDB_G0280047	GO:0006950	53.4732	1.52718	0.00158771	response to stress	0	1	yelA
DDB_G0280055	GO:0006950	53.4732	1.52718	0.00158771	response to stress	0	1	abcC2
DDB_G0280057	GO:0006950	53.4732	1.52718	0.00158771	response to stress	0	1	grp94
DDB_G0280267	GO:0006950	53.4732	1.52718	0.00158771	response to stress	1	1	allC
DDB_G0280321	GO:0006950	53.4732	1.52718	0.00158771	response to stress	0	1	fhkE
DDB_G0280469	GO:0006950	53.4732	1.52718	0.00158771	response to stress	1	1	psrA
DDB_G0280531	GO:0006950	53.4732	1.52718	0.00158771	response to stress	0	1	tgrC1
DDB_G0280539	GO:0006950	53.4732	1.52718	0.00158771	response to stress	0	1	abcC13
DDB_G0280545	GO:0006950	53.4732	1.52718	0.00158771	response to stress	0	1	act7
DDB_G0280547	GO:0006950	53.4732	1.52718	0.00158771	response to stress	0	1	comH
DDB_G0280635	GO:0006950	53.4732	1.52718	0.00158771	response to stress	0	1	tgrC2
DDB_G0280705	GO:0006950	53.4732	1.52718	0.00158771	response to stress	0	1	chdB
DDB_G0280773	GO:0006950	53.4732	1.52718	0.00158771	response to stress	1	1	DDB_G0280773
DDB_G0280775	GO:0006950	53.4732	1.52718	0.00158771	response to stress	0	1	rvb2
DDB_G0280847	GO:0006950	53.4732	1.52718	0.00158771	response to stress	0	1	2C
DDB_G0280955	GO:0006950	53.4732	1.52718	0.00158771	response to stress	0	1	dsgg
DDB_G0280961	GO:0006950	53.4732	1.52718	0.00158771	response to stress	0	1	dhkA
DDB_G0280975	GO:0006950	53.4732	1.52718	0.00158771	response to stress	0	1	racE
DDB_G0281167	GO:0006950	53.4732	1.52718	0.00158771	response to stress	1	1	dnapkcs
DDB_G0281229	GO:0006950	53.4732	1.52718	0.00158771	response to stress	0	1	pnkp
DDB_G0281315	GO:0006950	53.4732	1.52718	0.00158771	response to stress	0	1	psmD11
DDB_G0281385	GO:0006950	53.4732	1.52718	0.00158771	response to stress	0	1	rasC
DDB_G0281387	GO:0006950	53.4732	1.52718	0.00158771	response to stress	0	1	srfA
DDB_G0281389	GO:0006950	53.4732	1.52718	0.00158771	response to stress	0	1	abcG6
DDB_G0281407	GO:0006950	53.4732	1.52718	0.00158771	response to stress	0	1	tgrC5
DDB_G0281441	GO:0006950	53.4732	1.52718	0.00158771	response to stress	0	1	ercc6
DDB_G0281461	GO:0006950	53.4732	1.52718	0.00158771	response to stress	1	1	sodF
DDB_G0281493	GO:0006950	53.4732	1.52718	0.00158771	response to stress	1	1	sodD
DDB_G0281545	GO:0006950	53.4732	1.52718	0.00158771	response to stress	0	1	acaA
DDB_G0281561	GO:0006950	53.4732	1.52718	0.00158771	response to stress	0	1	tipA
DDB_G0281563	GO:0006950	53.4732	1.52718	0.00158771	response to stress	0	1	mybC
DDB_G0281567	GO:0006950	53.4732	1.52718	0.00158771	response to stress	1	1	fhkC
DDB_G0281569	GO:0006950	53.4732	1.52718	0.00158771	response to stress	0	1	tor
DDB_G0281571	GO:0006950	53.4732	1.52718	0.00158771	response to stress	0	1	comE
DDB_G0281605	GO:0006950	53.4732	1.52718	0.00158771	response to stress	0	1	cfaD
DDB_G0281663	GO:0006950	53.4732	1.52718	0.00158771	response to stress	0	1	aprA
DDB_G0281683	GO:0006950	53.4732	1.52718	0.00158771	response to stress	1	1	msh3
DDB_G0281825	GO:0006950	53.4732	1.52718	0.00158771	response to stress	0	1	comB
DDB_G0281891	GO:0006950	53.4732	1.52718	0.00158771	response to stress	0	1	rbg3
DDB_G0281947	GO:0006950	53.4732	1.52718	0.00158771	response to stress	0	1	tra1
DDB_G0281991	GO:0006950	53.4732	1.52718	0.00158771	response to stress	0	1	nse4
DDB_G0282009	GO:0006950	53.4732	1.52718	0.00158771	response to stress	0	1	ahhA
DDB_G0282093	GO:0006950	53.4732	1.52718	0.00158771	response to stress	0	1	DDB_G0282093
DDB_G0282103	GO:0006950	53.4732	1.52718	0.00158771	response to stress	0	1	abcG24
DDB_G0282145	GO:0006950	53.4732	1.52718	0.00158771	response to stress	0	1	ptpC
DDB_G0282191	GO:0006950	53.4732	1.52718	0.00158771	response to stress	0	1	polA1
DDB_G0282193	GO:0006950	53.4732	1.52718	0.00158771	response to stress	0	1	DDB_G0282193
DDB_G0282299	GO:0006950	53.4732	1.52718	0.00158771	response to stress	0	1	DDB_G0282299
DDB_G0282313	GO:0006950	53.4732	1.52718	0.00158771	response to stress	0	1	DDB_G0282313
DDB_G0282375	GO:0006950	53.4732	1.52718	0.00158771	response to stress	0	1	amiB
DDB_G0282419	GO:0006950	53.4732	1.52718	0.00158771	response to stress	0	1	cyp508B1
DDB_G0282581	GO:0006950	53.4732	1.52718	0.00158771	response to stress	0	1	wdr45l
DDB_G0282615	GO:0006950	53.4732	1.52718	0.00158771	response to stress	0	1	midA
DDB_G0282627	GO:0006950	53.4732	1.52718	0.00158771	response to stress	0	1	vps15
DDB_G0282677	GO:0006950	53.4732	1.52718	0.00158771	response to stress	0	1	spt16
DDB_G0282819	GO:0006950	53.4732	1.52718	0.00158771	response to stress	0	1	sglA
DDB_G0282923	GO:0006950	53.4732	1.52718	0.00158771	response to stress	0	1	rdeA
DDB_G0282929	GO:0006950	53.4732	1.52718	0.00158771	response to stress	0	1	atg12
DDB_G0282997	GO:0006950	53.4732	1.52718	0.00158771	response to stress	0	1	rad54
DDB_G0283015	GO:0006950	53.4732	1.52718	0.00158771	response to stress	0	1	DDB_G0283015
DDB_G0283021	GO:0006950	53.4732	1.52718	0.00158771	response to stress	0	1	sodB
DDB_G0283189	GO:0006950	53.4732	1.52718	0.00158771	response to stress	0	1	DDB_G0283189
DDB_G0283263	GO:0006950	53.4732	1.52718	0.00158771	response to stress	0	1	migA
DDB_G0283265	GO:0006950	53.4732	1.52718	0.00158771	response to stress	0	1	mkkA
DDB_G0283345	GO:0006950	53.4732	1.52718	0.00158771	response to stress	0	1	comD
DDB_G0283385	GO:0006950	53.4732	1.52718	0.00158771	response to stress	1	1	splA
DDB_G0283387	GO:0006950	53.4732	1.52718	0.00158771	response to stress	0	1	abcA10
DDB_G0283389	GO:0006950	53.4732	1.52718	0.00158771	response to stress	0	1	rhgA
DDB_G0283605	GO:0006950	53.4732	1.52718	0.00158771	response to stress	0	1	yakA
DDB_G0283615	GO:0006950	53.4732	1.52718	0.00158771	response to stress	0	1	rpkA
DDB_G0283637	GO:0006950	53.4732	1.52718	0.00158771	response to stress	0	1	xrcc3
DDB_G0283699	GO:0006950	53.4732	1.52718	0.00158771	response to stress	0	1	phg2
DDB_G0283753	GO:0006950	53.4732	1.52718	0.00158771	response to stress	0	1	DDB_G0283753
DDB_G0283855	GO:0006950	53.4732	1.52718	0.00158771	response to stress	0	1	gpr89
DDB_G0283857	GO:0006950	53.4732	1.52718	0.00158771	response to stress	0	1	lig3
DDB_G0283907	GO:0006950	53.4732	1.52718	0.00158771	response to stress	0	1	pkaC
DDB_G0283957	GO:0006950	53.4732	1.52718	0.00158771	response to stress	0	1	msh4
DDB_G0283981	GO:0006950	53.4732	1.52718	0.00158771	response to stress	0	1	pms1
DDB_G0283983	GO:0006950	53.4732	1.52718	0.00158771	response to stress	0	1	hfnA
DDB_G0284047	GO:0006950	53.4732	1.52718	0.00158771	response to stress	0	1	abcF2
DDB_G0284065	GO:0006950	53.4732	1.52718	0.00158771	response to stress	1	1	rapgap9
DDB_G0284171	GO:0006950	53.4732	1.52718	0.00158771	response to stress	0	1	chdA
DDB_G0284177	GO:0006950	53.4732	1.52718	0.00158771	response to stress	0	1	DDB_G0284177
DDB_G0284181	GO:0006950	53.4732	1.52718	0.00158771	response to stress	0	1	krsA
DDB_G0284183	GO:0006950	53.4732	1.52718	0.00158771	response to stress	0	1	mrfA
DDB_G0284329	GO:0006950	53.4732	1.52718	0.00158771	response to stress	0	1	gefA
DDB_G0284331	GO:0006950	53.4732	1.52718	0.00158771	response to stress	0	1	regA
DDB_G0284363	GO:0006950	53.4732	1.52718	0.00158771	response to stress	0	1	cf60
DDB_G0284419	GO:0006950	53.4732	1.52718	0.00158771	response to stress	0	1	xpf
DDB_G0284465	GO:0006950	53.4732	1.52718	0.00158771	response to stress	0	1	cudA
DDB_G0284495	GO:0006950	53.4732	1.52718	0.00158771	response to stress	0	1	ragC
DDB_G0284611	GO:0006950	53.4732	1.52718	0.00158771	response to stress	0	1	ripA
DDB_G0284619	GO:0006950	53.4732	1.52718	0.00158771	response to stress	0	1	DDB_G0284619
DDB_G0284659	GO:0006950	53.4732	1.52718	0.00158771	response to stress	0	1	tgrL1
DDB_G0284713	GO:0006950	53.4732	1.52718	0.00158771	response to stress	0	1	polB
DDB_G0284731	GO:0006950	53.4732	1.52718	0.00158771	response to stress	0	1	DDB_G0284731
DDB_G0284747	GO:0006950	53.4732	1.52718	0.00158771	response to stress	0	1	msh5
DDB_G0284785	GO:0006950	53.4732	1.52718	0.00158771	response to stress	1	1	nhej1
DDB_G0284845	GO:0006950	53.4732	1.52718	0.00158771	response to stress	0	1	gxcC
DDB_G0284867	GO:0006950	53.4732	1.52718	0.00158771	response to stress	0	1	abcC8
DDB_G0285083	GO:0006950	53.4732	1.52718	0.00158771	response to stress	1	1	DDB_G0285083
DDB_G0285117	GO:0006950	53.4732	1.52718	0.00158771	response to stress	0	1	rad54b
DDB_G0285131	GO:0006950	53.4732	1.52718	0.00158771	response to stress	0	1	derl2
DDB_G0285161	GO:0006950	53.4732	1.52718	0.00158771	response to stress	0	1	dagA
DDB_G0285163	GO:0006950	53.4732	1.52718	0.00158771	response to stress	0	1	gacT
DDB_G0285165	GO:0006950	53.4732	1.52718	0.00158771	response to stress	0	1	abcC9
DDB_G0285175	GO:0006950	53.4732	1.52718	0.00158771	response to stress	0	1	vmp1
DDB_G0285253	GO:0006950	53.4732	1.52718	0.00158771	response to stress	0	1	scrA
DDB_G0285323	GO:0006950	53.4732	1.52718	0.00158771	response to stress	0	1	atg9
DDB_G0285375	GO:0006950	53.4732	1.52718	0.00158771	response to stress	0	1	atg18
DDB_G0285381	GO:0006950	53.4732	1.52718	0.00158771	response to stress	0	1	polD1
DDB_G0285513	GO:0006950	53.4732	1.52718	0.00158771	response to stress	0	1	asf1
DDB_G0285575	GO:0006950	53.4732	1.52718	0.00158771	response to stress	0	1	alkB
DDB_G0285741	GO:0006950	53.4732	1.52718	0.00158771	response to stress	0	1	prdx5
DDB_G0285845	GO:0006950	53.4732	1.52718	0.00158771	response to stress	0	1	phdA
DDB_G0285925	GO:0006950	53.4732	1.52718	0.00158771	response to stress	0	1	sunB
DDB_G0285939	GO:0006950	53.4732	1.52718	0.00158771	response to stress	0	1	ctnnA
DDB_G0285961	GO:0006950	53.4732	1.52718	0.00158771	response to stress	0	1	rfc1
DDB_G0285963	GO:0006950	53.4732	1.52718	0.00158771	response to stress	1	1	fhkD
DDB_G0285997	GO:0006950	53.4732	1.52718	0.00158771	response to stress	1	1	abcF1
DDB_G0286013	GO:0006950	53.4732	1.52718	0.00158771	response to stress	0	1	repE
DDB_G0286069	GO:0006950	53.4732	1.52718	0.00158771	response to stress	0	1	ku70
DDB_G0286119	GO:0006950	53.4732	1.52718	0.00158771	response to stress	1	1	tagB
DDB_G0286251	GO:0006950	53.4732	1.52718	0.00158771	response to stress	0	1	dnajc3
DDB_G0286303	GO:0006950	53.4732	1.52718	0.00158771	response to stress	0	1	ku80
DDB_G0286353	GO:0006950	53.4732	1.52718	0.00158771	response to stress	0	1	erkA
DDB_G0286355	GO:0006950	53.4732	1.52718	0.00158771	response to stress	0	1	mhcA
DDB_G0286359	GO:0006950	53.4732	1.52718	0.00158771	response to stress	0	1	svkA
DDB_G0286385	GO:0006950	53.4732	1.52718	0.00158771	response to stress	1	1	padA
DDB_G0286557	GO:0006950	53.4732	1.52718	0.00158771	response to stress	0	1	pten
DDB_G0286825	GO:0006950	53.4732	1.52718	0.00158771	response to stress	0	1	tgrD1
DDB_G0287101	GO:0006950	53.4732	1.52718	0.00158771	response to stress	0	1	noxB
DDB_G0287125	GO:0006950	53.4732	1.52718	0.00158771	response to stress	0	1	proA
DDB_G0287149	GO:0006950	53.4732	1.52718	0.00158771	response to stress	0	1	DDB_G0287149
DDB_G0287295	GO:0006950	53.4732	1.52718	0.00158771	response to stress	0	1	forC
DDB_G0287327	GO:0006950	53.4732	1.52718	0.00158771	response to stress	0	1	prmt5
DDB_G0287393	GO:0006950	53.4732	1.52718	0.00158771	response to stress	0	1	mlh1
DDB_G0287459	GO:0006950	53.4732	1.52718	0.00158771	response to stress	1	1	secG
DDB_G0287505	GO:0006950	53.4732	1.52718	0.00158771	response to stress	0	1	talB
DDB_G0287585	GO:0006950	53.4732	1.52718	0.00158771	response to stress	0	1	rgaA
DDB_G0287587	GO:0006950	53.4732	1.52718	0.00158771	response to stress	0	1	smlA
DDB_G0287593	GO:0006950	53.4732	1.52718	0.00158771	response to stress	0	1	abcC6
DDB_G0287691	GO:0006950	53.4732	1.52718	0.00158771	response to stress	0	1	abcC3
DDB_G0287779	GO:0006950	53.4732	1.52718	0.00158771	response to stress	0	1	arpG
DDB_G0287969	GO:0006950	53.4732	1.52718	0.00158771	response to stress	0	1	cnrN
DDB_G0288047	GO:0006950	53.4732	1.52718	0.00158771	response to stress	1	1	dnmA
DDB_G0288065	GO:0006950	53.4732	1.52718	0.00158771	response to stress	0	1	cdcD
DDB_G0288217	GO:0006950	53.4732	1.52718	0.00158771	response to stress	0	1	mms19
DDB_G0288249	GO:0006950	53.4732	1.52718	0.00158771	response to stress	1	1	mkpA
DDB_G0288251	GO:0006950	53.4732	1.52718	0.00158771	response to stress	0	1	roco4
DDB_G0288287	GO:0006950	53.4732	1.52718	0.00158771	response to stress	0	1	atg101
DDB_G0288331	GO:0006950	53.4732	1.52718	0.00158771	response to stress	0	1	expl7
DDB_G0288381	GO:0006950	53.4732	1.52718	0.00158771	response to stress	0	1	DDB_G0288381
DDB_G0288485	GO:0006950	53.4732	1.52718	0.00158771	response to stress	0	1	pikD
DDB_G0288495	GO:0006950	53.4732	1.52718	0.00158771	response to stress	0	1	smdA
DDB_G0288581	GO:0006950	53.4732	1.52718	0.00158771	response to stress	0	1	DDB_G0288581
DDB_G0288595	GO:0006950	53.4732	1.52718	0.00158771	response to stress	1	1	DDB_G0288595
DDB_G0288697	GO:0006950	53.4732	1.52718	0.00158771	response to stress	0	1	DDB_G0288697
DDB_G0288701	GO:0006950	53.4732	1.52718	0.00158771	response to stress	0	1	ragA
DDB_G0288715	GO:0006950	53.4732	1.52718	0.00158771	response to stress	0	1	gadB
DDB_G0288747	GO:0006950	53.4732	1.52718	0.00158771	response to stress	0	1	DDB_G0288747
DDB_G0288755	GO:0006950	53.4732	1.52718	0.00158771	response to stress	1	1	gbfA
DDB_G0288771	GO:0006950	53.4732	1.52718	0.00158771	response to stress	0	1	darA
DDB_G0288833	GO:0006950	53.4732	1.52718	0.00158771	response to stress	1	1	derl1
DDB_G0288877	GO:0006950	53.4732	1.52718	0.00158771	response to stress	0	1	aarA
DDB_G0289001	GO:0006950	53.4732	1.52718	0.00158771	response to stress	0	1	pyk3
DDB_G0289005	GO:0006950	53.4732	1.52718	0.00158771	response to stress	0	1	act4
DDB_G0289073	GO:0006950	53.4732	1.52718	0.00158771	response to stress	0	1	csaA
DDB_G0289121	GO:0006950	53.4732	1.52718	0.00158771	response to stress	0	1	pde4
DDB_G0289237	GO:0006950	53.4732	1.52718	0.00158771	response to stress	0	1	tirA
DDB_G0289257	GO:0006950	53.4732	1.52718	0.00158771	response to stress	0	1	set1
DDB_G0289283	GO:0006950	53.4732	1.52718	0.00158771	response to stress	0	1	cupC
DDB_G0289309	GO:0006950	53.4732	1.52718	0.00158771	response to stress	1	1	DDB_G0289309
DDB_G0289329	GO:0006950	53.4732	1.52718	0.00158771	response to stress	1	1	dmtA
DDB_G0289331	GO:0006950	53.4732	1.52718	0.00158771	response to stress	0	1	abcG16
DDB_G0289377	GO:0006950	53.4732	1.52718	0.00158771	response to stress	0	1	DDB_G0289377
DDB_G0289521	GO:0006950	53.4732	1.52718	0.00158771	response to stress	0	1	srsA
DDB_G0289553	GO:0006950	53.4732	1.52718	0.00158771	response to stress	0	1	act1
DDB_G0289599	GO:0006950	53.4732	1.52718	0.00158771	response to stress	0	1	comA
DDB_G0289653	GO:0006950	53.4732	1.52718	0.00158771	response to stress	0	1	noxA
DDB_G0289655	GO:0006950	53.4732	1.52718	0.00158771	response to stress	0	1	abcG7
DDB_G0289665	GO:0006950	53.4732	1.52718	0.00158771	response to stress	0	1	gefQ
DDB_G0289813	GO:0006950	53.4732	1.52718	0.00158771	response to stress	0	1	cupF
DDB_G0290009	GO:0006950	53.4732	1.52718	0.00158771	response to stress	1	1	sr
DDB_G0290015	GO:0006950	53.4732	1.52718	0.00158771	response to stress	1	1	grxA
DDB_G0290079	GO:0006950	53.4732	1.52718	0.00158771	response to stress	1	1	pgtB
DDB_G0290165	GO:0006950	53.4732	1.52718	0.00158771	response to stress	0	1	bzpR
DDB_G0290227	GO:0006950	53.4732	1.52718	0.00158771	response to stress	0	1	npl4
DDB_G0290331	GO:0006950	53.4732	1.52718	0.00158771	response to stress	0	1	ssrp1
DDB_G0290343	GO:0006950	53.4732	1.52718	0.00158771	response to stress	0	1	sodE
DDB_G0290453	GO:0006950	53.4732	1.52718	0.00158771	response to stress	1	1	usp12
DDB_G0290481	GO:0006950	53.4732	1.52718	0.00158771	response to stress	0	1	talA
DDB_G0290551	GO:0006950	53.4732	1.52718	0.00158771	response to stress	0	1	rblA
DDB_G0290825	GO:0006950	53.4732	1.52718	0.00158771	response to stress	0	1	chlA
DDB_G0290835	GO:0006950	53.4732	1.52718	0.00158771	response to stress	0	1	DDB_G0290835
DDB_G0290853	GO:0006950	53.4732	1.52718	0.00158771	response to stress	1	1	stlB
DDB_G0290957	GO:0006950	53.4732	1.52718	0.00158771	response to stress	0	1	cprA
DDB_G0291031	GO:0006950	53.4732	1.52718	0.00158771	response to stress	1	1	ccs
DDB_G0291117	GO:0006950	53.4732	1.52718	0.00158771	response to stress	0	1	noxC
DDB_G0291157	GO:0006950	53.4732	1.52718	0.00158771	response to stress	0	1	cln3
DDB_G0291199	GO:0006950	53.4732	1.52718	0.00158771	response to stress	0	1	ube2t
DDB_G0291227	GO:0006950	53.4732	1.52718	0.00158771	response to stress	0	1	ctrA
DDB_G0291245	GO:0006950	53.4732	1.52718	0.00158771	response to stress	0	1	abcA6
DDB_G0291253	GO:0006950	53.4732	1.52718	0.00158771	response to stress	0	1	dia2
DDB_G0291275	GO:0006950	53.4732	1.52718	0.00158771	response to stress	0	1	mcln
DDB_G0291303	GO:0006950	53.4732	1.52718	0.00158771	response to stress	0	1	frmA
DDB_G0291314	GO:0006950	53.4732	1.52718	0.00158771	response to stress	0	1	DDB_G0291314
DDB_G0291342	GO:0006950	53.4732	1.52718	0.00158771	response to stress	0	1	tacA
DDB_G0291352	GO:0006950	53.4732	1.52718	0.00158771	response to stress	0	1	psenA
DDB_G0291356	GO:0006950	53.4732	1.52718	0.00158771	response to stress	0	1	grlE
DDB_G0291372	GO:0006950	53.4732	1.52718	0.00158771	response to stress	0	1	dimB
DDB_G0291380	GO:0006950	53.4732	1.52718	0.00158771	response to stress	0	1	atr1
DDB_G0291434	GO:0006950	53.4732	1.52718	0.00158771	response to stress	0	1	pdi2
DDB_G0291454	GO:0006950	53.4732	1.52718	0.00158771	response to stress	0	1	tgrC4
DDB_G0291568	GO:0006950	53.4732	1.52718	0.00158771	response to stress	0	1	dnaja1
DDB_G0291570	GO:0006950	53.4732	1.52718	0.00158771	response to stress	0	1	exo1
DDB_G0291714	GO:0006950	53.4732	1.52718	0.00158771	response to stress	1	1	abcB3
DDB_G0291728	GO:0006950	53.4732	1.52718	0.00158771	response to stress	1	1	arpE
DDB_G0291752	GO:0006950	53.4732	1.52718	0.00158771	response to stress	0	1	smc1
DDB_G0291788	GO:0006950	53.4732	1.52718	0.00158771	response to stress	0	1	adprt3
DDB_G0291926	GO:0006950	53.4732	1.52718	0.00158771	response to stress	0	1	DDB_G0291926
DDB_G0291972	GO:0006950	53.4732	1.52718	0.00158771	response to stress	0	1	culA
DDB_G0291980	GO:0006950	53.4732	1.52718	0.00158771	response to stress	1	1	abcA9
DDB_G0292130	GO:0006950	53.4732	1.52718	0.00158771	response to stress	0	1	blm
DDB_G0292162	GO:0006950	53.4732	1.52718	0.00158771	response to stress	1	1	DDB_G0292162
DDB_G0292206	GO:0006950	53.4732	1.52718	0.00158771	response to stress	0	1	manA
DDB_G0292250	GO:0006950	53.4732	1.52718	0.00158771	response to stress	0	1	sqrdl
DDB_G0292260	GO:0006950	53.4732	1.52718	0.00158771	response to stress	0	1	DDB_G0292260_RTE
DDB_G0292262	GO:0006950	53.4732	1.52718	0.00158771	response to stress	0	1	myoM
DDB_G0292268	GO:0006950	53.4732	1.52718	0.00158771	response to stress	0	1	rab2A
DDB_G0292270	GO:0006950	53.4732	1.52718	0.00158771	response to stress	0	1	comG
DDB_G0292296	GO:0006950	53.4732	1.52718	0.00158771	response to stress	0	1	xpc
DDB_G0292310	GO:0006950	53.4732	1.52718	0.00158771	response to stress	0	1	psenB
DDB_G0292358	GO:0006950	53.4732	1.52718	0.00158771	response to stress	0	1	ino80
DDB_G0292390	GO:0006950	53.4732	1.52718	0.00158771	response to stress	0	1	atg1
DDB_G0292436	GO:0006950	53.4732	1.52718	0.00158771	response to stress	0	1	triA
DDB_G0292562	GO:0006950	53.4732	1.52718	0.00158771	response to stress	1	1	tgrQ1
DDB_G0292564	GO:0006950	53.4732	1.52718	0.00158771	response to stress	0	1	iplA
DDB_G0292574	GO:0006950	53.4732	1.52718	0.00158771	response to stress	1	1	DDB_G0292574
DDB_G0292592	GO:0006950	53.4732	1.52718	0.00158771	response to stress	0	1	lst8
DDB_G0292596	GO:0006950	53.4732	1.52718	0.00158771	response to stress	0	1	ube2v
DDB_G0292618	GO:0006950	53.4732	1.52718	0.00158771	response to stress	0	1	ogg1
DDB_G0292682	GO:0006950	53.4732	1.52718	0.00158771	response to stress	0	1	trappc8
DDB_G0292736	GO:0006950	53.4732	1.52718	0.00158771	response to stress	0	1	plc
DDB_G0292744	GO:0006950	53.4732	1.52718	0.00158771	response to stress	0	1	fncL
DDB_G0292760	GO:0006950	53.4732	1.52718	0.00158771	response to stress	0	1	lig4
DDB_G0292786	GO:0006950	53.4732	1.52718	0.00158771	response to stress	0	1	rad50
DDB_G0292924	GO:0006950	53.4732	1.52718	0.00158771	response to stress	0	1	adcA
DDB_G0292986	GO:0006950	53.4732	1.52718	0.00158771	response to stress	0	1	abcG10
DDB_G0293008	GO:0006950	53.4732	1.52718	0.00158771	response to stress	0	1	cpnA
DDB_G0293012	GO:0006950	53.4732	1.52718	0.00158771	response to stress	0	1	chdC
DDB_G0293084	GO:0006950	53.4732	1.52718	0.00158771	response to stress	0	1	zizB
DDB_G0293192	GO:0006950	53.4732	1.52718	0.00158771	response to stress	0	1	DG1098
DDB_G0293194	GO:0006950	53.4732	1.52718	0.00158771	response to stress	0	1	abcD2
DDB_G0293212	GO:0006950	53.4732	1.52718	0.00158771	response to stress	0	1	DDB_G0293212
DDB_G0293300	GO:0006950	53.4732	1.52718	0.00158771	response to stress	0	1	DDB_G0293300
DDB_G0293302	GO:0006950	53.4732	1.52718	0.00158771	response to stress	0	1	DDB_G0293302
DDB_G0293416	GO:0006950	53.4732	1.52718	0.00158771	response to stress	0	1	abcB1
DDB_G0293436	GO:0006950	53.4732	1.52718	0.00158771	response to stress	0	1	abcA3
DDB_G0293476	GO:0006950	53.4732	1.52718	0.00158771	response to stress	0	1	fncI
DDB_G0293492	GO:0006950	53.4732	1.52718	0.00158771	response to stress	0	1	DDB_G0293492
DDB_G0293498	GO:0006950	53.4732	1.52718	0.00158771	response to stress	0	1	DDB_G0293498
DDB_G0293522	GO:0006950	53.4732	1.52718	0.00158771	response to stress	0	1	ponA
DDB_G0293530	GO:0006950	53.4732	1.52718	0.00158771	response to stress	1	1	pefB
DDB_G0293532	GO:0006950	53.4732	1.52718	0.00158771	response to stress	0	1	dstC
DDB_G0293544	GO:0006950	53.4732	1.52718	0.00158771	response to stress	0	1	cepK
DDB_G0293546	GO:0006950	53.4732	1.52718	0.00158771	response to stress	0	1	mre11
DDB_G0293566	GO:0006950	53.4732	1.52718	0.00158771	response to stress	0	1	DDB_G0293566
DDB_G0293656	GO:0006950	53.4732	1.52718	0.00158771	response to stress	0	1	fhkA
DDB_G0293752	GO:0006950	53.4732	1.52718	0.00158771	response to stress	0	1	psmD2
DDB_G0293850	GO:0006950	53.4732	1.52718	0.00158771	response to stress	0	1	alrA
DDB_G0293904	GO:0006950	53.4732	1.52718	0.00158771	response to stress	0	1	redA
DDB_G0294046	GO:0006950	53.4732	1.52718	0.00158771	response to stress	0	1	mrps4
DDB_G0294290	GO:0006950	53.4732	1.52718	0.00158771	response to stress	0	1	DDB_G0294290
DDB_G0294376	GO:0006950	53.4732	1.52718	0.00158771	response to stress	1	1	fcpA
DDB_G0294407	GO:0006950	53.4732	1.52718	0.00158771	response to stress	0	1	helF
DDB_G0294515	GO:0006950	53.4732	1.52718	0.00158771	response to stress	1	1	dutA
DDB_G0294533	GO:0006950	53.4732	1.52718	0.00158771	response to stress	0	1	roco5
DDB_G0295485	GO:0006950	53.4732	1.52718	0.00158771	response to stress	0	1	DDB_G0295485
DDB_G0267376	GO:0048856	38.3568	1.61107	0.00182068	anatomical structure development	0	1	acrA
DDB_G0267384	GO:0048856	38.3568	1.61107	0.00182068	anatomical structure development	1	1	culB
DDB_G0267400	GO:0048856	38.3568	1.61107	0.00182068	anatomical structure development	0	1	hspD
DDB_G0267410	GO:0048856	38.3568	1.61107	0.00182068	anatomical structure development	0	1	pslA
DDB_G0267422	GO:0048856	38.3568	1.61107	0.00182068	anatomical structure development	0	1	tipC
DDB_G0267424	GO:0048856	38.3568	1.61107	0.00182068	anatomical structure development	1	1	amtC
DDB_G0267426	GO:0048856	38.3568	1.61107	0.00182068	anatomical structure development	0	1	cshA
DDB_G0267432	GO:0048856	38.3568	1.61107	0.00182068	anatomical structure development	0	1	abcG15
DDB_G0267436	GO:0048856	38.3568	1.61107	0.00182068	anatomical structure development	0	1	abcF4
DDB_G0267444	GO:0048856	38.3568	1.61107	0.00182068	anatomical structure development	0	1	phg1A
DDB_G0267452	GO:0048856	38.3568	1.61107	0.00182068	anatomical structure development	0	1	sonA
DDB_G0267460	GO:0048856	38.3568	1.61107	0.00182068	anatomical structure development	0	1	cybA
DDB_G0267462	GO:0048856	38.3568	1.61107	0.00182068	anatomical structure development	0	1	Dd5P4
DDB_G0267470	GO:0048856	38.3568	1.61107	0.00182068	anatomical structure development	0	1	dicB
DDB_G0267474	GO:0048856	38.3568	1.61107	0.00182068	anatomical structure development	1	1	sigD
DDB_G0267476	GO:0048856	38.3568	1.61107	0.00182068	anatomical structure development	0	1	sigK
DDB_G0267830	GO:0048856	38.3568	1.61107	0.00182068	anatomical structure development	0	1	gemA
DDB_G0267962	GO:0048856	38.3568	1.61107	0.00182068	anatomical structure development	0	1	tsuA
DDB_G0268144	GO:0048856	38.3568	1.61107	0.00182068	anatomical structure development	0	1	vwkA
DDB_G0268168	GO:0048856	38.3568	1.61107	0.00182068	anatomical structure development	1	1	png
DDB_G0268266	GO:0048856	38.3568	1.61107	0.00182068	anatomical structure development	0	1	DDB_G0268266
DDB_G0268446	GO:0048856	38.3568	1.61107	0.00182068	anatomical structure development	0	1	cbhA
DDB_G0268578	GO:0048856	38.3568	1.61107	0.00182068	anatomical structure development	1	1	gefV
DDB_G0268632	GO:0048856	38.3568	1.61107	0.00182068	anatomical structure development	0	1	abpA
DDB_G0268636	GO:0048856	38.3568	1.61107	0.00182068	anatomical structure development	0	1	roco11
DDB_G0268790	GO:0048856	38.3568	1.61107	0.00182068	anatomical structure development	0	1	DDB_G0268790
DDB_G0268920	GO:0048856	38.3568	1.61107	0.00182068	anatomical structure development	0	1	mef2A
DDB_G0269100	GO:0048856	38.3568	1.61107	0.00182068	anatomical structure development	1	1	abpC
DDB_G0269108	GO:0048856	38.3568	1.61107	0.00182068	anatomical structure development	0	1	catB
DDB_G0269112	GO:0048856	38.3568	1.61107	0.00182068	anatomical structure development	1	1	celB
DDB_G0269124	GO:0048856	38.3568	1.61107	0.00182068	anatomical structure development	0	1	dcsA
DDB_G0269152	GO:0048856	38.3568	1.61107	0.00182068	anatomical structure development	0	1	mekA
DDB_G0269154	GO:0048856	38.3568	1.61107	0.00182068	anatomical structure development	0	1	modA
DDB_G0269160	GO:0048856	38.3568	1.61107	0.00182068	anatomical structure development	0	1	nxnA
DDB_G0269166	GO:0048856	38.3568	1.61107	0.00182068	anatomical structure development	1	1	pakA
DDB_G0269184	GO:0048856	38.3568	1.61107	0.00182068	anatomical structure development	0	1	rzpA
DDB_G0269202	GO:0048856	38.3568	1.61107	0.00182068	anatomical structure development	0	1	gdcA
DDB_G0269222	GO:0048856	38.3568	1.61107	0.00182068	anatomical structure development	0	1	gefB
DDB_G0269234	GO:0048856	38.3568	1.61107	0.00182068	anatomical structure development	0	1	act8
DDB_G0269244	GO:0048856	38.3568	1.61107	0.00182068	anatomical structure development	0	1	atg6A
DDB_G0269248	GO:0048856	38.3568	1.61107	0.00182068	anatomical structure development	0	1	cf45-1
DDB_G0269364	GO:0048856	38.3568	1.61107	0.00182068	anatomical structure development	0	1	stlA
DDB_G0269610	GO:0048856	38.3568	1.61107	0.00182068	anatomical structure development	0	1	gxcT
DDB_G0269696	GO:0048856	38.3568	1.61107	0.00182068	anatomical structure development	0	1	pakD
DDB_G0269902	GO:0048856	38.3568	1.61107	0.00182068	anatomical structure development	0	1	act26
DDB_G0269914	GO:0048856	38.3568	1.61107	0.00182068	anatomical structure development	0	1	tpp1
DDB_G0270024	GO:0048856	38.3568	1.61107	0.00182068	anatomical structure development	0	1	mgp2
DDB_G0270434	GO:0048856	38.3568	1.61107	0.00182068	anatomical structure development	0	1	med23
DDB_G0270658	GO:0048856	38.3568	1.61107	0.00182068	anatomical structure development	0	1	acbA
DDB_G0270666	GO:0048856	38.3568	1.61107	0.00182068	anatomical structure development	0	1	gdt2
DDB_G0270756	GO:0048856	38.3568	1.61107	0.00182068	anatomical structure development	0	1	gtaG
DDB_G0270994	GO:0048856	38.3568	1.61107	0.00182068	anatomical structure development	1	1	psaA
DDB_G0271022	GO:0048856	38.3568	1.61107	0.00182068	anatomical structure development	0	1	adcC
DDB_G0271096	GO:0048856	38.3568	1.61107	0.00182068	anatomical structure development	0	1	atg7
DDB_G0271134	GO:0048856	38.3568	1.61107	0.00182068	anatomical structure development	0	1	celA
DDB_G0271140	GO:0048856	38.3568	1.61107	0.00182068	anatomical structure development	0	1	abcA7
DDB_G0271346	GO:0048856	38.3568	1.61107	0.00182068	anatomical structure development	1	1	yod1
DDB_G0271500	GO:0048856	38.3568	1.61107	0.00182068	anatomical structure development	1	1	keaA
DDB_G0271502	GO:0048856	38.3568	1.61107	0.00182068	anatomical structure development	0	1	lvsD
DDB_G0271504	GO:0048856	38.3568	1.61107	0.00182068	anatomical structure development	1	1	lvsB
DDB_G0271546	GO:0048856	38.3568	1.61107	0.00182068	anatomical structure development	0	1	DDB_G0271546
DDB_G0271586	GO:0048856	38.3568	1.61107	0.00182068	anatomical structure development	0	1	tgrK1
DDB_G0271598	GO:0048856	38.3568	1.61107	0.00182068	anatomical structure development	0	1	tgrS1
DDB_G0271626	GO:0048856	38.3568	1.61107	0.00182068	anatomical structure development	1	1	dotA
DDB_G0271646	GO:0048856	38.3568	1.61107	0.00182068	anatomical structure development	0	1	tgrK2
DDB_G0271654	GO:0048856	38.3568	1.61107	0.00182068	anatomical structure development	0	1	tgrK3
DDB_G0271684	GO:0048856	38.3568	1.61107	0.00182068	anatomical structure development	0	1	grlA
DDB_G0271692	GO:0048856	38.3568	1.61107	0.00182068	anatomical structure development	1	1	comC
DDB_G0272002	GO:0048856	38.3568	1.61107	0.00182068	anatomical structure development	0	1	egeA
DDB_G0272038	GO:0048856	38.3568	1.61107	0.00182068	anatomical structure development	0	1	rgfA
DDB_G0272106	GO:0048856	38.3568	1.61107	0.00182068	anatomical structure development	0	1	arpB
DDB_G0272116	GO:0048856	38.3568	1.61107	0.00182068	anatomical structure development	0	1	ppp4c
DDB_G0272150	GO:0048856	38.3568	1.61107	0.00182068	anatomical structure development	0	1	grlJ
DDB_G0272248	GO:0048856	38.3568	1.61107	0.00182068	anatomical structure development	0	1	act16
DDB_G0272344	GO:0048856	38.3568	1.61107	0.00182068	anatomical structure development	0	1	htt
DDB_G0272754	GO:0048856	38.3568	1.61107	0.00182068	anatomical structure development	0	1	gsr
DDB_G0272837	GO:0048856	38.3568	1.61107	0.00182068	anatomical structure development	0	1	ifkA
DDB_G0272861	GO:0048856	38.3568	1.61107	0.00182068	anatomical structure development	0	1	cosA
DDB_G0274101	GO:0048856	38.3568	1.61107	0.00182068	anatomical structure development	1	1	dokA
DDB_G0274103	GO:0048856	38.3568	1.61107	0.00182068	anatomical structure development	0	1	ggtA
DDB_G0274107	GO:0048856	38.3568	1.61107	0.00182068	anatomical structure development	0	1	sfbA
DDB_G0274119	GO:0048856	38.3568	1.61107	0.00182068	anatomical structure development	0	1	abcA5
DDB_G0274121	GO:0048856	38.3568	1.61107	0.00182068	anatomical structure development	1	1	abcA4
DDB_G0274135	GO:0048856	38.3568	1.61107	0.00182068	anatomical structure development	0	1	act6
DDB_G0274139	GO:0048856	38.3568	1.61107	0.00182068	anatomical structure development	0	1	cycC
DDB_G0274177	GO:0048856	38.3568	1.61107	0.00182068	anatomical structure development	0	1	DDB_G0274177
DDB_G0274383	GO:0048856	38.3568	1.61107	0.00182068	anatomical structure development	0	1	pdeD
DDB_G0274395	GO:0048856	38.3568	1.61107	0.00182068	anatomical structure development	0	1	adcB
DDB_G0274455	GO:0048856	38.3568	1.61107	0.00182068	anatomical structure development	1	1	myoI
DDB_G0274569	GO:0048856	38.3568	1.61107	0.00182068	anatomical structure development	0	1	acgA
DDB_G0274577	GO:0048856	38.3568	1.61107	0.00182068	anatomical structure development	1	1	DG1124
DDB_G0274597	GO:0048856	38.3568	1.61107	0.00182068	anatomical structure development	0	1	ctnA
DDB_G0274741	GO:0048856	38.3568	1.61107	0.00182068	anatomical structure development	0	1	gnt15
DDB_G0274805	GO:0048856	38.3568	1.61107	0.00182068	anatomical structure development	0	1	ibrA
DDB_G0275045	GO:0048856	38.3568	1.61107	0.00182068	anatomical structure development	0	1	gpbB
DDB_G0275065	GO:0048856	38.3568	1.61107	0.00182068	anatomical structure development	0	1	dmpA
DDB_G0275077	GO:0048856	38.3568	1.61107	0.00182068	anatomical structure development	0	1	pks17
DDB_G0275299	GO:0048856	38.3568	1.61107	0.00182068	anatomical structure development	1	1	cln5
DDB_G0275437	GO:0048856	38.3568	1.61107	0.00182068	anatomical structure development	0	1	7E
DDB_G0275451	GO:0048856	38.3568	1.61107	0.00182068	anatomical structure development	1	1	alxA
DDB_G0275519	GO:0048856	38.3568	1.61107	0.00182068	anatomical structure development	0	1	DDB_G0275519
DDB_G0275635	GO:0048856	38.3568	1.61107	0.00182068	anatomical structure development	0	1	pik6
DDB_G0275687	GO:0048856	38.3568	1.61107	0.00182068	anatomical structure development	1	1	abcG18
DDB_G0275689	GO:0048856	38.3568	1.61107	0.00182068	anatomical structure development	0	1	abcG2
DDB_G0275695	GO:0048856	38.3568	1.61107	0.00182068	anatomical structure development	0	1	ampA
DDB_G0275747	GO:0048856	38.3568	1.61107	0.00182068	anatomical structure development	0	1	DDB_G0275747
DDB_G0275815	GO:0048856	38.3568	1.61107	0.00182068	anatomical structure development	0	1	nrampB
DDB_G0275931	GO:0048856	38.3568	1.61107	0.00182068	anatomical structure development	0	1	ncsA
DDB_G0276025	GO:0048856	38.3568	1.61107	0.00182068	anatomical structure development	0	1	zakA
DDB_G0276077	GO:0048856	38.3568	1.61107	0.00182068	anatomical structure development	0	1	mlcR
DDB_G0276155	GO:0048856	38.3568	1.61107	0.00182068	anatomical structure development	1	1	spnA
DDB_G0276251	GO:0048856	38.3568	1.61107	0.00182068	anatomical structure development	1	1	DDB_G0276251
DDB_G0276267	GO:0048856	38.3568	1.61107	0.00182068	anatomical structure development	0	1	gpaB
DDB_G0276333	GO:0048856	38.3568	1.61107	0.00182068	anatomical structure development	0	1	tipB
DDB_G0276363	GO:0048856	38.3568	1.61107	0.00182068	anatomical structure development	0	1	myoG
DDB_G0276371	GO:0048856	38.3568	1.61107	0.00182068	anatomical structure development	0	1	gefL
DDB_G0276399	GO:0048856	38.3568	1.61107	0.00182068	anatomical structure development	0	1	rab8B
DDB_G0276465	GO:0048856	38.3568	1.61107	0.00182068	anatomical structure development	0	1	sepA
DDB_G0276761	GO:0048856	38.3568	1.61107	0.00182068	anatomical structure development	0	1	cotB
DDB_G0276869	GO:0048856	38.3568	1.61107	0.00182068	anatomical structure development	1	1	psvA
DDB_G0276883	GO:0048856	38.3568	1.61107	0.00182068	anatomical structure development	1	1	canA
DDB_G0276887	GO:0048856	38.3568	1.61107	0.00182068	anatomical structure development	0	1	fbxA
DDB_G0276941	GO:0048856	38.3568	1.61107	0.00182068	anatomical structure development	0	1	cotA
DDB_G0277071	GO:0048856	38.3568	1.61107	0.00182068	anatomical structure development	0	1	dupA
DDB_G0277075	GO:0048856	38.3568	1.61107	0.00182068	anatomical structure development	0	1	detA
DDB_G0277141	GO:0048856	38.3568	1.61107	0.00182068	anatomical structure development	0	1	cotC
DDB_G0277143	GO:0048856	38.3568	1.61107	0.00182068	anatomical structure development	0	1	gpbA
DDB_G0277165	GO:0048856	38.3568	1.61107	0.00182068	anatomical structure development	0	1	DDB_G0277165
DDB_G0277221	GO:0048856	38.3568	1.61107	0.00182068	anatomical structure development	0	1	chcA
DDB_G0277223	GO:0048856	38.3568	1.61107	0.00182068	anatomical structure development	0	1	dgkA
DDB_G0277273	GO:0048856	38.3568	1.61107	0.00182068	anatomical structure development	0	1	phg1B
DDB_G0277379	GO:0048856	38.3568	1.61107	0.00182068	anatomical structure development	0	1	pspD
DDB_G0277399	GO:0048856	38.3568	1.61107	0.00182068	anatomical structure development	0	1	piaA
DDB_G0277403	GO:0048856	38.3568	1.61107	0.00182068	anatomical structure development	0	1	clc
DDB_G0277503	GO:0048856	38.3568	1.61107	0.00182068	anatomical structure development	0	1	amtA
DDB_G0277589	GO:0048856	38.3568	1.61107	0.00182068	anatomical structure development	0	1	gtaC
DDB_G0277829	GO:0048856	38.3568	1.61107	0.00182068	anatomical structure development	0	1	carC
DDB_G0277831	GO:0048856	38.3568	1.61107	0.00182068	anatomical structure development	0	1	carD
DDB_G0277843	GO:0048856	38.3568	1.61107	0.00182068	anatomical structure development	1	1	scaA
DDB_G0277845	GO:0048856	38.3568	1.61107	0.00182068	anatomical structure development	0	1	dhkB
DDB_G0277859	GO:0048856	38.3568	1.61107	0.00182068	anatomical structure development	0	1	mlcE
DDB_G0277863	GO:0048856	38.3568	1.61107	0.00182068	anatomical structure development	0	1	pdiA
DDB_G0277865	GO:0048856	38.3568	1.61107	0.00182068	anatomical structure development	1	1	ptpB
DDB_G0277871	GO:0048856	38.3568	1.61107	0.00182068	anatomical structure development	0	1	rsc12
DDB_G0277887	GO:0048856	38.3568	1.61107	0.00182068	anatomical structure development	0	1	dhkK
DDB_G0277987	GO:0048856	38.3568	1.61107	0.00182068	anatomical structure development	0	1	gxcA
DDB_G0278051	GO:0048856	38.3568	1.61107	0.00182068	anatomical structure development	0	1	elmoA
DDB_G0278077	GO:0048856	38.3568	1.61107	0.00182068	anatomical structure development	0	1	crtf
DDB_G0278333	GO:0048856	38.3568	1.61107	0.00182068	anatomical structure development	0	1	DDB_G0278333
DDB_G0278525	GO:0048856	38.3568	1.61107	0.00182068	anatomical structure development	0	1	plaA
DDB_G0278581	GO:0048856	38.3568	1.61107	0.00182068	anatomical structure development	0	1	psiF
DDB_G0278639	GO:0048856	38.3568	1.61107	0.00182068	anatomical structure development	0	1	clcD
DDB_G0278723	GO:0048856	38.3568	1.61107	0.00182068	anatomical structure development	0	1	gdt1
DDB_G0278727	GO:0048856	38.3568	1.61107	0.00182068	anatomical structure development	0	1	pikA
DDB_G0278737	GO:0048856	38.3568	1.61107	0.00182068	anatomical structure development	0	1	rckA
DDB_G0278741	GO:0048856	38.3568	1.61107	0.00182068	anatomical structure development	0	1	adprt1A
DDB_G0278945	GO:0048856	38.3568	1.61107	0.00182068	anatomical structure development	1	1	DDB_G0278945
DDB_G0278971	GO:0048856	38.3568	1.61107	0.00182068	anatomical structure development	0	1	dimA
DDB_G0279257	GO:0048856	38.3568	1.61107	0.00182068	anatomical structure development	0	1	hbx8
DDB_G0279483	GO:0048856	38.3568	1.61107	0.00182068	anatomical structure development	0	1	pldB
DDB_G0279629	GO:0048856	38.3568	1.61107	0.00182068	anatomical structure development	0	1	lkb1
DDB_G0279733	GO:0048856	38.3568	1.61107	0.00182068	anatomical structure development	1	1	gxcDD
DDB_G0279797	GO:0048856	38.3568	1.61107	0.00182068	anatomical structure development	1	1	ctnB
DDB_G0279915	GO:0048856	38.3568	1.61107	0.00182068	anatomical structure development	0	1	abcB4
DDB_G0279945	GO:0048856	38.3568	1.61107	0.00182068	anatomical structure development	0	1	DDB_G0279945
DDB_G0280043	GO:0048856	38.3568	1.61107	0.00182068	anatomical structure development	0	1	rab8A
DDB_G0280047	GO:0048856	38.3568	1.61107	0.00182068	anatomical structure development	0	1	yelA
DDB_G0280055	GO:0048856	38.3568	1.61107	0.00182068	anatomical structure development	0	1	abcC2
DDB_G0280267	GO:0048856	38.3568	1.61107	0.00182068	anatomical structure development	1	1	allC
DDB_G0280469	GO:0048856	38.3568	1.61107	0.00182068	anatomical structure development	1	1	psrA
DDB_G0280473	GO:0048856	38.3568	1.61107	0.00182068	anatomical structure development	0	1	hbx9
DDB_G0280531	GO:0048856	38.3568	1.61107	0.00182068	anatomical structure development	0	1	tgrC1
DDB_G0280539	GO:0048856	38.3568	1.61107	0.00182068	anatomical structure development	0	1	abcC13
DDB_G0280545	GO:0048856	38.3568	1.61107	0.00182068	anatomical structure development	0	1	act7
DDB_G0280547	GO:0048856	38.3568	1.61107	0.00182068	anatomical structure development	0	1	comH
DDB_G0280635	GO:0048856	38.3568	1.61107	0.00182068	anatomical structure development	0	1	tgrC2
DDB_G0280705	GO:0048856	38.3568	1.61107	0.00182068	anatomical structure development	0	1	chdB
DDB_G0280847	GO:0048856	38.3568	1.61107	0.00182068	anatomical structure development	0	1	2C
DDB_G0280961	GO:0048856	38.3568	1.61107	0.00182068	anatomical structure development	0	1	dhkA
DDB_G0280975	GO:0048856	38.3568	1.61107	0.00182068	anatomical structure development	0	1	racE
DDB_G0281221	GO:0048856	38.3568	1.61107	0.00182068	anatomical structure development	0	1	tbccd
DDB_G0281385	GO:0048856	38.3568	1.61107	0.00182068	anatomical structure development	0	1	rasC
DDB_G0281387	GO:0048856	38.3568	1.61107	0.00182068	anatomical structure development	0	1	srfA
DDB_G0281389	GO:0048856	38.3568	1.61107	0.00182068	anatomical structure development	0	1	abcG6
DDB_G0281407	GO:0048856	38.3568	1.61107	0.00182068	anatomical structure development	0	1	tgrC5
DDB_G0281545	GO:0048856	38.3568	1.61107	0.00182068	anatomical structure development	0	1	acaA
DDB_G0281553	GO:0048856	38.3568	1.61107	0.00182068	anatomical structure development	0	1	helC
DDB_G0281561	GO:0048856	38.3568	1.61107	0.00182068	anatomical structure development	0	1	tipA
DDB_G0281563	GO:0048856	38.3568	1.61107	0.00182068	anatomical structure development	0	1	mybC
DDB_G0281571	GO:0048856	38.3568	1.61107	0.00182068	anatomical structure development	0	1	comE
DDB_G0281605	GO:0048856	38.3568	1.61107	0.00182068	anatomical structure development	0	1	cfaD
DDB_G0281663	GO:0048856	38.3568	1.61107	0.00182068	anatomical structure development	0	1	aprA
DDB_G0281671	GO:0048856	38.3568	1.61107	0.00182068	anatomical structure development	0	1	DDB_G0281671
DDB_G0281825	GO:0048856	38.3568	1.61107	0.00182068	anatomical structure development	0	1	comB
DDB_G0281891	GO:0048856	38.3568	1.61107	0.00182068	anatomical structure development	0	1	rbg3
DDB_G0282009	GO:0048856	38.3568	1.61107	0.00182068	anatomical structure development	0	1	ahhA
DDB_G0282093	GO:0048856	38.3568	1.61107	0.00182068	anatomical structure development	0	1	DDB_G0282093
DDB_G0282103	GO:0048856	38.3568	1.61107	0.00182068	anatomical structure development	0	1	abcG24
DDB_G0282223	GO:0048856	38.3568	1.61107	0.00182068	anatomical structure development	0	1	DDB_G0282223
DDB_G0282375	GO:0048856	38.3568	1.61107	0.00182068	anatomical structure development	0	1	amiB
DDB_G0282419	GO:0048856	38.3568	1.61107	0.00182068	anatomical structure development	0	1	cyp508B1
DDB_G0282615	GO:0048856	38.3568	1.61107	0.00182068	anatomical structure development	0	1	midA
DDB_G0282819	GO:0048856	38.3568	1.61107	0.00182068	anatomical structure development	0	1	sglA
DDB_G0282923	GO:0048856	38.3568	1.61107	0.00182068	anatomical structure development	0	1	rdeA
DDB_G0283015	GO:0048856	38.3568	1.61107	0.00182068	anatomical structure development	0	1	DDB_G0283015
DDB_G0283081	GO:0048856	38.3568	1.61107	0.00182068	anatomical structure development	0	1	pikB
DDB_G0283149	GO:0048856	38.3568	1.61107	0.00182068	anatomical structure development	1	1	cotD
DDB_G0283263	GO:0048856	38.3568	1.61107	0.00182068	anatomical structure development	0	1	migA
DDB_G0283265	GO:0048856	38.3568	1.61107	0.00182068	anatomical structure development	0	1	mkkA
DDB_G0283345	GO:0048856	38.3568	1.61107	0.00182068	anatomical structure development	0	1	comD
DDB_G0283385	GO:0048856	38.3568	1.61107	0.00182068	anatomical structure development	1	1	splA
DDB_G0283387	GO:0048856	38.3568	1.61107	0.00182068	anatomical structure development	0	1	abcA10
DDB_G0283537	GO:0048856	38.3568	1.61107	0.00182068	anatomical structure development	0	1	rasS
DDB_G0283555	GO:0048856	38.3568	1.61107	0.00182068	anatomical structure development	0	1	DDB_G0283555
DDB_G0283605	GO:0048856	38.3568	1.61107	0.00182068	anatomical structure development	0	1	yakA
DDB_G0283615	GO:0048856	38.3568	1.61107	0.00182068	anatomical structure development	0	1	rpkA
DDB_G0283699	GO:0048856	38.3568	1.61107	0.00182068	anatomical structure development	0	1	phg2
DDB_G0283855	GO:0048856	38.3568	1.61107	0.00182068	anatomical structure development	0	1	gpr89
DDB_G0283907	GO:0048856	38.3568	1.61107	0.00182068	anatomical structure development	0	1	pkaC
DDB_G0283983	GO:0048856	38.3568	1.61107	0.00182068	anatomical structure development	0	1	hfnA
DDB_G0284047	GO:0048856	38.3568	1.61107	0.00182068	anatomical structure development	0	1	abcF2
DDB_G0284065	GO:0048856	38.3568	1.61107	0.00182068	anatomical structure development	1	1	rapgap9
DDB_G0284171	GO:0048856	38.3568	1.61107	0.00182068	anatomical structure development	0	1	chdA
DDB_G0284177	GO:0048856	38.3568	1.61107	0.00182068	anatomical structure development	0	1	DDB_G0284177
DDB_G0284181	GO:0048856	38.3568	1.61107	0.00182068	anatomical structure development	0	1	krsA
DDB_G0284183	GO:0048856	38.3568	1.61107	0.00182068	anatomical structure development	0	1	mrfA
DDB_G0284329	GO:0048856	38.3568	1.61107	0.00182068	anatomical structure development	0	1	gefA
DDB_G0284331	GO:0048856	38.3568	1.61107	0.00182068	anatomical structure development	0	1	regA
DDB_G0284363	GO:0048856	38.3568	1.61107	0.00182068	anatomical structure development	0	1	cf60
DDB_G0284465	GO:0048856	38.3568	1.61107	0.00182068	anatomical structure development	0	1	cudA
DDB_G0284611	GO:0048856	38.3568	1.61107	0.00182068	anatomical structure development	0	1	ripA
DDB_G0284613	GO:0048856	38.3568	1.61107	0.00182068	anatomical structure development	0	1	D7
DDB_G0284619	GO:0048856	38.3568	1.61107	0.00182068	anatomical structure development	0	1	DDB_G0284619
DDB_G0284659	GO:0048856	38.3568	1.61107	0.00182068	anatomical structure development	0	1	tgrL1
DDB_G0284845	GO:0048856	38.3568	1.61107	0.00182068	anatomical structure development	0	1	gxcC
DDB_G0284867	GO:0048856	38.3568	1.61107	0.00182068	anatomical structure development	0	1	abcC8
DDB_G0285083	GO:0048856	38.3568	1.61107	0.00182068	anatomical structure development	1	1	DDB_G0285083
DDB_G0285161	GO:0048856	38.3568	1.61107	0.00182068	anatomical structure development	0	1	dagA
DDB_G0285163	GO:0048856	38.3568	1.61107	0.00182068	anatomical structure development	0	1	gacT
DDB_G0285165	GO:0048856	38.3568	1.61107	0.00182068	anatomical structure development	0	1	abcC9
DDB_G0285175	GO:0048856	38.3568	1.61107	0.00182068	anatomical structure development	0	1	vmp1
DDB_G0285253	GO:0048856	38.3568	1.61107	0.00182068	anatomical structure development	0	1	scrA
DDB_G0285323	GO:0048856	38.3568	1.61107	0.00182068	anatomical structure development	0	1	atg9
DDB_G0285427	GO:0048856	38.3568	1.61107	0.00182068	anatomical structure development	0	1	mkcA
DDB_G0285431	GO:0048856	38.3568	1.61107	0.00182068	anatomical structure development	1	1	dia1
DDB_G0285455	GO:0048856	38.3568	1.61107	0.00182068	anatomical structure development	0	1	impA
DDB_G0285589	GO:0048856	38.3568	1.61107	0.00182068	anatomical structure development	0	1	forH
DDB_G0285837	GO:0048856	38.3568	1.61107	0.00182068	anatomical structure development	0	1	DDB_G0285837
DDB_G0285845	GO:0048856	38.3568	1.61107	0.00182068	anatomical structure development	0	1	phdA
DDB_G0285925	GO:0048856	38.3568	1.61107	0.00182068	anatomical structure development	0	1	sunB
DDB_G0285939	GO:0048856	38.3568	1.61107	0.00182068	anatomical structure development	0	1	ctnnA
DDB_G0285997	GO:0048856	38.3568	1.61107	0.00182068	anatomical structure development	1	1	abcF1
DDB_G0286119	GO:0048856	38.3568	1.61107	0.00182068	anatomical structure development	1	1	tagB
DDB_G0286303	GO:0048856	38.3568	1.61107	0.00182068	anatomical structure development	0	1	ku80
DDB_G0286353	GO:0048856	38.3568	1.61107	0.00182068	anatomical structure development	0	1	erkA
DDB_G0286355	GO:0048856	38.3568	1.61107	0.00182068	anatomical structure development	0	1	mhcA
DDB_G0286359	GO:0048856	38.3568	1.61107	0.00182068	anatomical structure development	0	1	svkA
DDB_G0286385	GO:0048856	38.3568	1.61107	0.00182068	anatomical structure development	1	1	padA
DDB_G0286557	GO:0048856	38.3568	1.61107	0.00182068	anatomical structure development	0	1	pten
DDB_G0286733	GO:0048856	38.3568	1.61107	0.00182068	anatomical structure development	0	1	hbx12
DDB_G0286825	GO:0048856	38.3568	1.61107	0.00182068	anatomical structure development	0	1	tgrD1
DDB_G0286961	GO:0048856	38.3568	1.61107	0.00182068	anatomical structure development	0	1	rbrA
DDB_G0287101	GO:0048856	38.3568	1.61107	0.00182068	anatomical structure development	0	1	noxB
DDB_G0287125	GO:0048856	38.3568	1.61107	0.00182068	anatomical structure development	0	1	proA
DDB_G0287291	GO:0048856	38.3568	1.61107	0.00182068	anatomical structure development	0	1	abpD
DDB_G0287295	GO:0048856	38.3568	1.61107	0.00182068	anatomical structure development	0	1	forC
DDB_G0287327	GO:0048856	38.3568	1.61107	0.00182068	anatomical structure development	0	1	prmt5
DDB_G0287427	GO:0048856	38.3568	1.61107	0.00182068	anatomical structure development	0	1	DDB_G0287427
DDB_G0287459	GO:0048856	38.3568	1.61107	0.00182068	anatomical structure development	1	1	secG
DDB_G0287505	GO:0048856	38.3568	1.61107	0.00182068	anatomical structure development	0	1	talB
DDB_G0287583	GO:0048856	38.3568	1.61107	0.00182068	anatomical structure development	0	1	gerC
DDB_G0287585	GO:0048856	38.3568	1.61107	0.00182068	anatomical structure development	0	1	rgaA
DDB_G0287587	GO:0048856	38.3568	1.61107	0.00182068	anatomical structure development	0	1	smlA
DDB_G0287593	GO:0048856	38.3568	1.61107	0.00182068	anatomical structure development	0	1	abcC6
DDB_G0287687	GO:0048856	38.3568	1.61107	0.00182068	anatomical structure development	0	1	gerB
DDB_G0287691	GO:0048856	38.3568	1.61107	0.00182068	anatomical structure development	0	1	abcC3
DDB_G0287855	GO:0048856	38.3568	1.61107	0.00182068	anatomical structure development	0	1	pirA
DDB_G0287969	GO:0048856	38.3568	1.61107	0.00182068	anatomical structure development	0	1	cnrN
DDB_G0288047	GO:0048856	38.3568	1.61107	0.00182068	anatomical structure development	1	1	dnmA
DDB_G0288249	GO:0048856	38.3568	1.61107	0.00182068	anatomical structure development	1	1	mkpA
DDB_G0288251	GO:0048856	38.3568	1.61107	0.00182068	anatomical structure development	0	1	roco4
DDB_G0288331	GO:0048856	38.3568	1.61107	0.00182068	anatomical structure development	0	1	expl7
DDB_G0288485	GO:0048856	38.3568	1.61107	0.00182068	anatomical structure development	0	1	pikD
DDB_G0288495	GO:0048856	38.3568	1.61107	0.00182068	anatomical structure development	0	1	smdA
DDB_G0288511	GO:0048856	38.3568	1.61107	0.00182068	anatomical structure development	0	1	sadA
DDB_G0288581	GO:0048856	38.3568	1.61107	0.00182068	anatomical structure development	0	1	DDB_G0288581
DDB_G0288715	GO:0048856	38.3568	1.61107	0.00182068	anatomical structure development	0	1	gadB
DDB_G0288755	GO:0048856	38.3568	1.61107	0.00182068	anatomical structure development	1	1	gbfA
DDB_G0288769	GO:0048856	38.3568	1.61107	0.00182068	anatomical structure development	0	1	cap
DDB_G0288771	GO:0048856	38.3568	1.61107	0.00182068	anatomical structure development	0	1	darA
DDB_G0288877	GO:0048856	38.3568	1.61107	0.00182068	anatomical structure development	0	1	aarA
DDB_G0288975	GO:0048856	38.3568	1.61107	0.00182068	anatomical structure development	1	1	hbx13
DDB_G0289001	GO:0048856	38.3568	1.61107	0.00182068	anatomical structure development	0	1	pyk3
DDB_G0289005	GO:0048856	38.3568	1.61107	0.00182068	anatomical structure development	0	1	act4
DDB_G0289073	GO:0048856	38.3568	1.61107	0.00182068	anatomical structure development	0	1	csaA
DDB_G0289121	GO:0048856	38.3568	1.61107	0.00182068	anatomical structure development	0	1	pde4
DDB_G0289257	GO:0048856	38.3568	1.61107	0.00182068	anatomical structure development	0	1	set1
DDB_G0289329	GO:0048856	38.3568	1.61107	0.00182068	anatomical structure development	1	1	dmtA
DDB_G0289331	GO:0048856	38.3568	1.61107	0.00182068	anatomical structure development	0	1	abcG16
DDB_G0289377	GO:0048856	38.3568	1.61107	0.00182068	anatomical structure development	0	1	DDB_G0289377
DDB_G0289389	GO:0048856	38.3568	1.61107	0.00182068	anatomical structure development	0	1	dtfA
DDB_G0289521	GO:0048856	38.3568	1.61107	0.00182068	anatomical structure development	0	1	srsA
DDB_G0289553	GO:0048856	38.3568	1.61107	0.00182068	anatomical structure development	0	1	act1
DDB_G0289555	GO:0048856	38.3568	1.61107	0.00182068	anatomical structure development	0	1	arkA
DDB_G0289653	GO:0048856	38.3568	1.61107	0.00182068	anatomical structure development	0	1	noxA
DDB_G0289655	GO:0048856	38.3568	1.61107	0.00182068	anatomical structure development	0	1	abcG7
DDB_G0289665	GO:0048856	38.3568	1.61107	0.00182068	anatomical structure development	0	1	gefQ
DDB_G0289811	GO:0048856	38.3568	1.61107	0.00182068	anatomical structure development	0	1	act10
DDB_G0290015	GO:0048856	38.3568	1.61107	0.00182068	anatomical structure development	1	1	grxA
DDB_G0290079	GO:0048856	38.3568	1.61107	0.00182068	anatomical structure development	1	1	pgtB
DDB_G0290165	GO:0048856	38.3568	1.61107	0.00182068	anatomical structure development	0	1	bzpR
DDB_G0290453	GO:0048856	38.3568	1.61107	0.00182068	anatomical structure development	1	1	usp12
DDB_G0290481	GO:0048856	38.3568	1.61107	0.00182068	anatomical structure development	0	1	talA
DDB_G0290551	GO:0048856	38.3568	1.61107	0.00182068	anatomical structure development	0	1	rblA
DDB_G0290825	GO:0048856	38.3568	1.61107	0.00182068	anatomical structure development	0	1	chlA
DDB_G0290835	GO:0048856	38.3568	1.61107	0.00182068	anatomical structure development	0	1	DDB_G0290835
DDB_G0290853	GO:0048856	38.3568	1.61107	0.00182068	anatomical structure development	1	1	stlB
DDB_G0291075	GO:0048856	38.3568	1.61107	0.00182068	anatomical structure development	0	1	warA
DDB_G0291117	GO:0048856	38.3568	1.61107	0.00182068	anatomical structure development	0	1	noxC
DDB_G0291157	GO:0048856	38.3568	1.61107	0.00182068	anatomical structure development	0	1	cln3
DDB_G0291197	GO:0048856	38.3568	1.61107	0.00182068	anatomical structure development	0	1	hbx3
DDB_G0291227	GO:0048856	38.3568	1.61107	0.00182068	anatomical structure development	0	1	ctrA
DDB_G0291245	GO:0048856	38.3568	1.61107	0.00182068	anatomical structure development	0	1	abcA6
DDB_G0291253	GO:0048856	38.3568	1.61107	0.00182068	anatomical structure development	0	1	dia2
DDB_G0291303	GO:0048856	38.3568	1.61107	0.00182068	anatomical structure development	0	1	frmA
DDB_G0291342	GO:0048856	38.3568	1.61107	0.00182068	anatomical structure development	0	1	tacA
DDB_G0291352	GO:0048856	38.3568	1.61107	0.00182068	anatomical structure development	0	1	psenA
DDB_G0291356	GO:0048856	38.3568	1.61107	0.00182068	anatomical structure development	0	1	grlE
DDB_G0291372	GO:0048856	38.3568	1.61107	0.00182068	anatomical structure development	0	1	dimB
DDB_G0291454	GO:0048856	38.3568	1.61107	0.00182068	anatomical structure development	0	1	tgrC4
DDB_G0291512	GO:0048856	38.3568	1.61107	0.00182068	anatomical structure development	0	1	epnA
DDB_G0291556	GO:0048856	38.3568	1.61107	0.00182068	anatomical structure development	0	1	prmt1
DDB_G0291714	GO:0048856	38.3568	1.61107	0.00182068	anatomical structure development	1	1	abcB3
DDB_G0291788	GO:0048856	38.3568	1.61107	0.00182068	anatomical structure development	0	1	adprt3
DDB_G0291926	GO:0048856	38.3568	1.61107	0.00182068	anatomical structure development	0	1	DDB_G0291926
DDB_G0291972	GO:0048856	38.3568	1.61107	0.00182068	anatomical structure development	0	1	culA
DDB_G0291980	GO:0048856	38.3568	1.61107	0.00182068	anatomical structure development	1	1	abcA9
DDB_G0291982	GO:0048856	38.3568	1.61107	0.00182068	anatomical structure development	0	1	psiA
DDB_G0292162	GO:0048856	38.3568	1.61107	0.00182068	anatomical structure development	1	1	DDB_G0292162
DDB_G0292206	GO:0048856	38.3568	1.61107	0.00182068	anatomical structure development	0	1	manA
DDB_G0292260	GO:0048856	38.3568	1.61107	0.00182068	anatomical structure development	0	1	DDB_G0292260_RTE
DDB_G0292266	GO:0048856	38.3568	1.61107	0.00182068	anatomical structure development	0	1	amdA
DDB_G0292268	GO:0048856	38.3568	1.61107	0.00182068	anatomical structure development	0	1	rab2A
DDB_G0292270	GO:0048856	38.3568	1.61107	0.00182068	anatomical structure development	0	1	comG
DDB_G0292310	GO:0048856	38.3568	1.61107	0.00182068	anatomical structure development	0	1	psenB
DDB_G0292390	GO:0048856	38.3568	1.61107	0.00182068	anatomical structure development	0	1	atg1
DDB_G0292436	GO:0048856	38.3568	1.61107	0.00182068	anatomical structure development	0	1	triA
DDB_G0292562	GO:0048856	38.3568	1.61107	0.00182068	anatomical structure development	1	1	tgrQ1
DDB_G0292564	GO:0048856	38.3568	1.61107	0.00182068	anatomical structure development	0	1	iplA
DDB_G0292592	GO:0048856	38.3568	1.61107	0.00182068	anatomical structure development	0	1	lst8
DDB_G0292736	GO:0048856	38.3568	1.61107	0.00182068	anatomical structure development	0	1	plc
DDB_G0292986	GO:0048856	38.3568	1.61107	0.00182068	anatomical structure development	0	1	abcG10
DDB_G0293008	GO:0048856	38.3568	1.61107	0.00182068	anatomical structure development	0	1	cpnA
DDB_G0293012	GO:0048856	38.3568	1.61107	0.00182068	anatomical structure development	0	1	chdC
DDB_G0293084	GO:0048856	38.3568	1.61107	0.00182068	anatomical structure development	0	1	zizB
DDB_G0293192	GO:0048856	38.3568	1.61107	0.00182068	anatomical structure development	0	1	DG1098
DDB_G0293194	GO:0048856	38.3568	1.61107	0.00182068	anatomical structure development	0	1	abcD2
DDB_G0293236	GO:0048856	38.3568	1.61107	0.00182068	anatomical structure development	0	1	DDB_G0293236
DDB_G0293302	GO:0048856	38.3568	1.61107	0.00182068	anatomical structure development	0	1	DDB_G0293302
DDB_G0293416	GO:0048856	38.3568	1.61107	0.00182068	anatomical structure development	0	1	abcB1
DDB_G0293436	GO:0048856	38.3568	1.61107	0.00182068	anatomical structure development	0	1	abcA3
DDB_G0293522	GO:0048856	38.3568	1.61107	0.00182068	anatomical structure development	0	1	ponA
DDB_G0293524	GO:0048856	38.3568	1.61107	0.00182068	anatomical structure development	0	1	ppk1
DDB_G0293530	GO:0048856	38.3568	1.61107	0.00182068	anatomical structure development	1	1	pefB
DDB_G0293532	GO:0048856	38.3568	1.61107	0.00182068	anatomical structure development	0	1	dstC
DDB_G0293544	GO:0048856	38.3568	1.61107	0.00182068	anatomical structure development	0	1	cepK
DDB_G0293850	GO:0048856	38.3568	1.61107	0.00182068	anatomical structure development	0	1	alrA
DDB_G0293904	GO:0048856	38.3568	1.61107	0.00182068	anatomical structure development	0	1	redA
DDB_G0294046	GO:0048856	38.3568	1.61107	0.00182068	anatomical structure development	0	1	mrps4
DDB_G0294407	GO:0048856	38.3568	1.61107	0.00182068	anatomical structure development	0	1	helF
DDB_G0294473	GO:0048856	38.3568	1.61107	0.00182068	anatomical structure development	0	1	staA
DDB_G0294515	GO:0048856	38.3568	1.61107	0.00182068	anatomical structure development	1	1	dutA
DDB_G0294533	GO:0048856	38.3568	1.61107	0.00182068	anatomical structure development	0	1	roco5
DDB_G0267376	GO:0051703	32.4953	1.62369	0.00303767	intraspecies interaction between organisms	0	1	acrA
DDB_G0267384	GO:0051703	32.4953	1.62369	0.00303767	intraspecies interaction between organisms	1	1	culB
DDB_G0267400	GO:0051703	32.4953	1.62369	0.00303767	intraspecies interaction between organisms	0	1	hspD
DDB_G0267422	GO:0051703	32.4953	1.62369	0.00303767	intraspecies interaction between organisms	0	1	tipC
DDB_G0267424	GO:0051703	32.4953	1.62369	0.00303767	intraspecies interaction between organisms	1	1	amtC
DDB_G0267426	GO:0051703	32.4953	1.62369	0.00303767	intraspecies interaction between organisms	0	1	cshA
DDB_G0267432	GO:0051703	32.4953	1.62369	0.00303767	intraspecies interaction between organisms	0	1	abcG15
DDB_G0267436	GO:0051703	32.4953	1.62369	0.00303767	intraspecies interaction between organisms	0	1	abcF4
DDB_G0267444	GO:0051703	32.4953	1.62369	0.00303767	intraspecies interaction between organisms	0	1	phg1A
DDB_G0267460	GO:0051703	32.4953	1.62369	0.00303767	intraspecies interaction between organisms	0	1	cybA
DDB_G0267462	GO:0051703	32.4953	1.62369	0.00303767	intraspecies interaction between organisms	0	1	Dd5P4
DDB_G0267470	GO:0051703	32.4953	1.62369	0.00303767	intraspecies interaction between organisms	0	1	dicB
DDB_G0267962	GO:0051703	32.4953	1.62369	0.00303767	intraspecies interaction between organisms	0	1	tsuA
DDB_G0268144	GO:0051703	32.4953	1.62369	0.00303767	intraspecies interaction between organisms	0	1	vwkA
DDB_G0268168	GO:0051703	32.4953	1.62369	0.00303767	intraspecies interaction between organisms	1	1	png
DDB_G0268266	GO:0051703	32.4953	1.62369	0.00303767	intraspecies interaction between organisms	0	1	DDB_G0268266
DDB_G0268446	GO:0051703	32.4953	1.62369	0.00303767	intraspecies interaction between organisms	0	1	cbhA
DDB_G0268578	GO:0051703	32.4953	1.62369	0.00303767	intraspecies interaction between organisms	1	1	gefV
DDB_G0268636	GO:0051703	32.4953	1.62369	0.00303767	intraspecies interaction between organisms	0	1	roco11
DDB_G0268920	GO:0051703	32.4953	1.62369	0.00303767	intraspecies interaction between organisms	0	1	mef2A
DDB_G0269100	GO:0051703	32.4953	1.62369	0.00303767	intraspecies interaction between organisms	1	1	abpC
DDB_G0269108	GO:0051703	32.4953	1.62369	0.00303767	intraspecies interaction between organisms	0	1	catB
DDB_G0269124	GO:0051703	32.4953	1.62369	0.00303767	intraspecies interaction between organisms	0	1	dcsA
DDB_G0269152	GO:0051703	32.4953	1.62369	0.00303767	intraspecies interaction between organisms	0	1	mekA
DDB_G0269154	GO:0051703	32.4953	1.62369	0.00303767	intraspecies interaction between organisms	0	1	modA
DDB_G0269160	GO:0051703	32.4953	1.62369	0.00303767	intraspecies interaction between organisms	0	1	nxnA
DDB_G0269166	GO:0051703	32.4953	1.62369	0.00303767	intraspecies interaction between organisms	1	1	pakA
DDB_G0269184	GO:0051703	32.4953	1.62369	0.00303767	intraspecies interaction between organisms	0	1	rzpA
DDB_G0269204	GO:0051703	32.4953	1.62369	0.00303767	intraspecies interaction between organisms	0	1	dhkE
DDB_G0269222	GO:0051703	32.4953	1.62369	0.00303767	intraspecies interaction between organisms	0	1	gefB
DDB_G0269244	GO:0051703	32.4953	1.62369	0.00303767	intraspecies interaction between organisms	0	1	atg6A
DDB_G0269248	GO:0051703	32.4953	1.62369	0.00303767	intraspecies interaction between organisms	0	1	cf45-1
DDB_G0269250	GO:0051703	32.4953	1.62369	0.00303767	intraspecies interaction between organisms	1	1	pats1
DDB_G0269364	GO:0051703	32.4953	1.62369	0.00303767	intraspecies interaction between organisms	0	1	stlA
DDB_G0269610	GO:0051703	32.4953	1.62369	0.00303767	intraspecies interaction between organisms	0	1	gxcT
DDB_G0269696	GO:0051703	32.4953	1.62369	0.00303767	intraspecies interaction between organisms	0	1	pakD
DDB_G0269914	GO:0051703	32.4953	1.62369	0.00303767	intraspecies interaction between organisms	0	1	tpp1
DDB_G0270024	GO:0051703	32.4953	1.62369	0.00303767	intraspecies interaction between organisms	0	1	mgp2
DDB_G0270434	GO:0051703	32.4953	1.62369	0.00303767	intraspecies interaction between organisms	0	1	med23
DDB_G0270572	GO:0051703	32.4953	1.62369	0.00303767	intraspecies interaction between organisms	0	1	pks2
DDB_G0270692	GO:0051703	32.4953	1.62369	0.00303767	intraspecies interaction between organisms	0	1	DDB_G0270692
DDB_G0270756	GO:0051703	32.4953	1.62369	0.00303767	intraspecies interaction between organisms	0	1	gtaG
DDB_G0270994	GO:0051703	32.4953	1.62369	0.00303767	intraspecies interaction between organisms	1	1	psaA
DDB_G0271022	GO:0051703	32.4953	1.62369	0.00303767	intraspecies interaction between organisms	0	1	adcC
DDB_G0271096	GO:0051703	32.4953	1.62369	0.00303767	intraspecies interaction between organisms	0	1	atg7
DDB_G0271140	GO:0051703	32.4953	1.62369	0.00303767	intraspecies interaction between organisms	0	1	abcA7
DDB_G0271346	GO:0051703	32.4953	1.62369	0.00303767	intraspecies interaction between organisms	1	1	yod1
DDB_G0271500	GO:0051703	32.4953	1.62369	0.00303767	intraspecies interaction between organisms	1	1	keaA
DDB_G0271502	GO:0051703	32.4953	1.62369	0.00303767	intraspecies interaction between organisms	0	1	lvsD
DDB_G0271504	GO:0051703	32.4953	1.62369	0.00303767	intraspecies interaction between organisms	1	1	lvsB
DDB_G0271586	GO:0051703	32.4953	1.62369	0.00303767	intraspecies interaction between organisms	0	1	tgrK1
DDB_G0271598	GO:0051703	32.4953	1.62369	0.00303767	intraspecies interaction between organisms	0	1	tgrS1
DDB_G0271626	GO:0051703	32.4953	1.62369	0.00303767	intraspecies interaction between organisms	1	1	dotA
DDB_G0271646	GO:0051703	32.4953	1.62369	0.00303767	intraspecies interaction between organisms	0	1	tgrK2
DDB_G0271654	GO:0051703	32.4953	1.62369	0.00303767	intraspecies interaction between organisms	0	1	tgrK3
DDB_G0271684	GO:0051703	32.4953	1.62369	0.00303767	intraspecies interaction between organisms	0	1	grlA
DDB_G0272002	GO:0051703	32.4953	1.62369	0.00303767	intraspecies interaction between organisms	0	1	egeA
DDB_G0272038	GO:0051703	32.4953	1.62369	0.00303767	intraspecies interaction between organisms	0	1	rgfA
DDB_G0272106	GO:0051703	32.4953	1.62369	0.00303767	intraspecies interaction between organisms	0	1	arpB
DDB_G0272116	GO:0051703	32.4953	1.62369	0.00303767	intraspecies interaction between organisms	0	1	ppp4c
DDB_G0272150	GO:0051703	32.4953	1.62369	0.00303767	intraspecies interaction between organisms	0	1	grlJ
DDB_G0272344	GO:0051703	32.4953	1.62369	0.00303767	intraspecies interaction between organisms	0	1	htt
DDB_G0272754	GO:0051703	32.4953	1.62369	0.00303767	intraspecies interaction between organisms	0	1	gsr
DDB_G0272837	GO:0051703	32.4953	1.62369	0.00303767	intraspecies interaction between organisms	0	1	ifkA
DDB_G0272861	GO:0051703	32.4953	1.62369	0.00303767	intraspecies interaction between organisms	0	1	cosA
DDB_G0274103	GO:0051703	32.4953	1.62369	0.00303767	intraspecies interaction between organisms	0	1	ggtA
DDB_G0274107	GO:0051703	32.4953	1.62369	0.00303767	intraspecies interaction between organisms	0	1	sfbA
DDB_G0274119	GO:0051703	32.4953	1.62369	0.00303767	intraspecies interaction between organisms	0	1	abcA5
DDB_G0274121	GO:0051703	32.4953	1.62369	0.00303767	intraspecies interaction between organisms	1	1	abcA4
DDB_G0274139	GO:0051703	32.4953	1.62369	0.00303767	intraspecies interaction between organisms	0	1	cycC
DDB_G0274177	GO:0051703	32.4953	1.62369	0.00303767	intraspecies interaction between organisms	0	1	DDB_G0274177
DDB_G0274383	GO:0051703	32.4953	1.62369	0.00303767	intraspecies interaction between organisms	0	1	pdeD
DDB_G0274395	GO:0051703	32.4953	1.62369	0.00303767	intraspecies interaction between organisms	0	1	adcB
DDB_G0274429	GO:0051703	32.4953	1.62369	0.00303767	intraspecies interaction between organisms	0	1	DDB_G0274429
DDB_G0274577	GO:0051703	32.4953	1.62369	0.00303767	intraspecies interaction between organisms	1	1	DG1124
DDB_G0274597	GO:0051703	32.4953	1.62369	0.00303767	intraspecies interaction between organisms	0	1	ctnA
DDB_G0274741	GO:0051703	32.4953	1.62369	0.00303767	intraspecies interaction between organisms	0	1	gnt15
DDB_G0274805	GO:0051703	32.4953	1.62369	0.00303767	intraspecies interaction between organisms	0	1	ibrA
DDB_G0275045	GO:0051703	32.4953	1.62369	0.00303767	intraspecies interaction between organisms	0	1	gpbB
DDB_G0275065	GO:0051703	32.4953	1.62369	0.00303767	intraspecies interaction between organisms	0	1	dmpA
DDB_G0275077	GO:0051703	32.4953	1.62369	0.00303767	intraspecies interaction between organisms	0	1	pks17
DDB_G0275437	GO:0051703	32.4953	1.62369	0.00303767	intraspecies interaction between organisms	0	1	7E
DDB_G0275451	GO:0051703	32.4953	1.62369	0.00303767	intraspecies interaction between organisms	1	1	alxA
DDB_G0275635	GO:0051703	32.4953	1.62369	0.00303767	intraspecies interaction between organisms	0	1	pik6
DDB_G0275687	GO:0051703	32.4953	1.62369	0.00303767	intraspecies interaction between organisms	1	1	abcG18
DDB_G0275689	GO:0051703	32.4953	1.62369	0.00303767	intraspecies interaction between organisms	0	1	abcG2
DDB_G0275695	GO:0051703	32.4953	1.62369	0.00303767	intraspecies interaction between organisms	0	1	ampA
DDB_G0275747	GO:0051703	32.4953	1.62369	0.00303767	intraspecies interaction between organisms	0	1	DDB_G0275747
DDB_G0275815	GO:0051703	32.4953	1.62369	0.00303767	intraspecies interaction between organisms	0	1	nrampB
DDB_G0275931	GO:0051703	32.4953	1.62369	0.00303767	intraspecies interaction between organisms	0	1	ncsA
DDB_G0276025	GO:0051703	32.4953	1.62369	0.00303767	intraspecies interaction between organisms	0	1	zakA
DDB_G0276077	GO:0051703	32.4953	1.62369	0.00303767	intraspecies interaction between organisms	0	1	mlcR
DDB_G0276251	GO:0051703	32.4953	1.62369	0.00303767	intraspecies interaction between organisms	1	1	DDB_G0276251
DDB_G0276267	GO:0051703	32.4953	1.62369	0.00303767	intraspecies interaction between organisms	0	1	gpaB
DDB_G0276333	GO:0051703	32.4953	1.62369	0.00303767	intraspecies interaction between organisms	0	1	tipB
DDB_G0276363	GO:0051703	32.4953	1.62369	0.00303767	intraspecies interaction between organisms	0	1	myoG
DDB_G0276371	GO:0051703	32.4953	1.62369	0.00303767	intraspecies interaction between organisms	0	1	gefL
DDB_G0276399	GO:0051703	32.4953	1.62369	0.00303767	intraspecies interaction between organisms	0	1	rab8B
DDB_G0276465	GO:0051703	32.4953	1.62369	0.00303767	intraspecies interaction between organisms	0	1	sepA
DDB_G0276883	GO:0051703	32.4953	1.62369	0.00303767	intraspecies interaction between organisms	1	1	canA
DDB_G0276887	GO:0051703	32.4953	1.62369	0.00303767	intraspecies interaction between organisms	0	1	fbxA
DDB_G0277071	GO:0051703	32.4953	1.62369	0.00303767	intraspecies interaction between organisms	0	1	dupA
DDB_G0277075	GO:0051703	32.4953	1.62369	0.00303767	intraspecies interaction between organisms	0	1	detA
DDB_G0277141	GO:0051703	32.4953	1.62369	0.00303767	intraspecies interaction between organisms	0	1	cotC
DDB_G0277143	GO:0051703	32.4953	1.62369	0.00303767	intraspecies interaction between organisms	0	1	gpbA
DDB_G0277165	GO:0051703	32.4953	1.62369	0.00303767	intraspecies interaction between organisms	0	1	DDB_G0277165
DDB_G0277221	GO:0051703	32.4953	1.62369	0.00303767	intraspecies interaction between organisms	0	1	chcA
DDB_G0277239	GO:0051703	32.4953	1.62369	0.00303767	intraspecies interaction between organisms	0	1	DDB_G0277239
DDB_G0277273	GO:0051703	32.4953	1.62369	0.00303767	intraspecies interaction between organisms	0	1	phg1B
DDB_G0277399	GO:0051703	32.4953	1.62369	0.00303767	intraspecies interaction between organisms	0	1	piaA
DDB_G0277403	GO:0051703	32.4953	1.62369	0.00303767	intraspecies interaction between organisms	0	1	clc
DDB_G0277503	GO:0051703	32.4953	1.62369	0.00303767	intraspecies interaction between organisms	0	1	amtA
DDB_G0277589	GO:0051703	32.4953	1.62369	0.00303767	intraspecies interaction between organisms	0	1	gtaC
DDB_G0277829	GO:0051703	32.4953	1.62369	0.00303767	intraspecies interaction between organisms	0	1	carC
DDB_G0277831	GO:0051703	32.4953	1.62369	0.00303767	intraspecies interaction between organisms	0	1	carD
DDB_G0277843	GO:0051703	32.4953	1.62369	0.00303767	intraspecies interaction between organisms	1	1	scaA
DDB_G0277859	GO:0051703	32.4953	1.62369	0.00303767	intraspecies interaction between organisms	0	1	mlcE
DDB_G0277865	GO:0051703	32.4953	1.62369	0.00303767	intraspecies interaction between organisms	1	1	ptpB
DDB_G0277871	GO:0051703	32.4953	1.62369	0.00303767	intraspecies interaction between organisms	0	1	rsc12
DDB_G0277887	GO:0051703	32.4953	1.62369	0.00303767	intraspecies interaction between organisms	0	1	dhkK
DDB_G0277987	GO:0051703	32.4953	1.62369	0.00303767	intraspecies interaction between organisms	0	1	gxcA
DDB_G0278051	GO:0051703	32.4953	1.62369	0.00303767	intraspecies interaction between organisms	0	1	elmoA
DDB_G0278333	GO:0051703	32.4953	1.62369	0.00303767	intraspecies interaction between organisms	0	1	DDB_G0278333
DDB_G0278525	GO:0051703	32.4953	1.62369	0.00303767	intraspecies interaction between organisms	0	1	plaA
DDB_G0278585	GO:0051703	32.4953	1.62369	0.00303767	intraspecies interaction between organisms	1	1	DDB_G0278585
DDB_G0278639	GO:0051703	32.4953	1.62369	0.00303767	intraspecies interaction between organisms	0	1	clcD
DDB_G0278727	GO:0051703	32.4953	1.62369	0.00303767	intraspecies interaction between organisms	0	1	pikA
DDB_G0278741	GO:0051703	32.4953	1.62369	0.00303767	intraspecies interaction between organisms	0	1	adprt1A
DDB_G0278945	GO:0051703	32.4953	1.62369	0.00303767	intraspecies interaction between organisms	1	1	DDB_G0278945
DDB_G0278971	GO:0051703	32.4953	1.62369	0.00303767	intraspecies interaction between organisms	0	1	dimA
DDB_G0279483	GO:0051703	32.4953	1.62369	0.00303767	intraspecies interaction between organisms	0	1	pldB
DDB_G0279629	GO:0051703	32.4953	1.62369	0.00303767	intraspecies interaction between organisms	0	1	lkb1
DDB_G0279733	GO:0051703	32.4953	1.62369	0.00303767	intraspecies interaction between organisms	1	1	gxcDD
DDB_G0279797	GO:0051703	32.4953	1.62369	0.00303767	intraspecies interaction between organisms	1	1	ctnB
DDB_G0279915	GO:0051703	32.4953	1.62369	0.00303767	intraspecies interaction between organisms	0	1	abcB4
DDB_G0279945	GO:0051703	32.4953	1.62369	0.00303767	intraspecies interaction between organisms	0	1	DDB_G0279945
DDB_G0280043	GO:0051703	32.4953	1.62369	0.00303767	intraspecies interaction between organisms	0	1	rab8A
DDB_G0280047	GO:0051703	32.4953	1.62369	0.00303767	intraspecies interaction between organisms	0	1	yelA
DDB_G0280055	GO:0051703	32.4953	1.62369	0.00303767	intraspecies interaction between organisms	0	1	abcC2
DDB_G0280089	GO:0051703	32.4953	1.62369	0.00303767	intraspecies interaction between organisms	0	1	DDB_G0280089
DDB_G0280267	GO:0051703	32.4953	1.62369	0.00303767	intraspecies interaction between organisms	1	1	allC
DDB_G0280299	GO:0051703	32.4953	1.62369	0.00303767	intraspecies interaction between organisms	0	1	DDB_G0280299
DDB_G0280469	GO:0051703	32.4953	1.62369	0.00303767	intraspecies interaction between organisms	1	1	psrA
DDB_G0280531	GO:0051703	32.4953	1.62369	0.00303767	intraspecies interaction between organisms	0	1	tgrC1
DDB_G0280539	GO:0051703	32.4953	1.62369	0.00303767	intraspecies interaction between organisms	0	1	abcC13
DDB_G0280547	GO:0051703	32.4953	1.62369	0.00303767	intraspecies interaction between organisms	0	1	comH
DDB_G0280635	GO:0051703	32.4953	1.62369	0.00303767	intraspecies interaction between organisms	0	1	tgrC2
DDB_G0280689	GO:0051703	32.4953	1.62369	0.00303767	intraspecies interaction between organisms	0	1	tgrB1
DDB_G0280705	GO:0051703	32.4953	1.62369	0.00303767	intraspecies interaction between organisms	0	1	chdB
DDB_G0280847	GO:0051703	32.4953	1.62369	0.00303767	intraspecies interaction between organisms	0	1	2C
DDB_G0280961	GO:0051703	32.4953	1.62369	0.00303767	intraspecies interaction between organisms	0	1	dhkA
DDB_G0280975	GO:0051703	32.4953	1.62369	0.00303767	intraspecies interaction between organisms	0	1	racE
DDB_G0281385	GO:0051703	32.4953	1.62369	0.00303767	intraspecies interaction between organisms	0	1	rasC
DDB_G0281387	GO:0051703	32.4953	1.62369	0.00303767	intraspecies interaction between organisms	0	1	srfA
DDB_G0281389	GO:0051703	32.4953	1.62369	0.00303767	intraspecies interaction between organisms	0	1	abcG6
DDB_G0281407	GO:0051703	32.4953	1.62369	0.00303767	intraspecies interaction between organisms	0	1	tgrC5
DDB_G0281545	GO:0051703	32.4953	1.62369	0.00303767	intraspecies interaction between organisms	0	1	acaA
DDB_G0281561	GO:0051703	32.4953	1.62369	0.00303767	intraspecies interaction between organisms	0	1	tipA
DDB_G0281563	GO:0051703	32.4953	1.62369	0.00303767	intraspecies interaction between organisms	0	1	mybC
DDB_G0281571	GO:0051703	32.4953	1.62369	0.00303767	intraspecies interaction between organisms	0	1	comE
DDB_G0281605	GO:0051703	32.4953	1.62369	0.00303767	intraspecies interaction between organisms	0	1	cfaD
DDB_G0281663	GO:0051703	32.4953	1.62369	0.00303767	intraspecies interaction between organisms	0	1	aprA
DDB_G0281825	GO:0051703	32.4953	1.62369	0.00303767	intraspecies interaction between organisms	0	1	comB
DDB_G0281891	GO:0051703	32.4953	1.62369	0.00303767	intraspecies interaction between organisms	0	1	rbg3
DDB_G0282009	GO:0051703	32.4953	1.62369	0.00303767	intraspecies interaction between organisms	0	1	ahhA
DDB_G0282093	GO:0051703	32.4953	1.62369	0.00303767	intraspecies interaction between organisms	0	1	DDB_G0282093
DDB_G0282103	GO:0051703	32.4953	1.62369	0.00303767	intraspecies interaction between organisms	0	1	abcG24
DDB_G0282375	GO:0051703	32.4953	1.62369	0.00303767	intraspecies interaction between organisms	0	1	amiB
DDB_G0282419	GO:0051703	32.4953	1.62369	0.00303767	intraspecies interaction between organisms	0	1	cyp508B1
DDB_G0282615	GO:0051703	32.4953	1.62369	0.00303767	intraspecies interaction between organisms	0	1	midA
DDB_G0282625	GO:0051703	32.4953	1.62369	0.00303767	intraspecies interaction between organisms	0	1	pikG
DDB_G0282819	GO:0051703	32.4953	1.62369	0.00303767	intraspecies interaction between organisms	0	1	sglA
DDB_G0282923	GO:0051703	32.4953	1.62369	0.00303767	intraspecies interaction between organisms	0	1	rdeA
DDB_G0283015	GO:0051703	32.4953	1.62369	0.00303767	intraspecies interaction between organisms	0	1	DDB_G0283015
DDB_G0283263	GO:0051703	32.4953	1.62369	0.00303767	intraspecies interaction between organisms	0	1	migA
DDB_G0283265	GO:0051703	32.4953	1.62369	0.00303767	intraspecies interaction between organisms	0	1	mkkA
DDB_G0283345	GO:0051703	32.4953	1.62369	0.00303767	intraspecies interaction between organisms	0	1	comD
DDB_G0283373	GO:0051703	32.4953	1.62369	0.00303767	intraspecies interaction between organisms	0	1	DDB_G0283373
DDB_G0283385	GO:0051703	32.4953	1.62369	0.00303767	intraspecies interaction between organisms	1	1	splA
DDB_G0283387	GO:0051703	32.4953	1.62369	0.00303767	intraspecies interaction between organisms	0	1	abcA10
DDB_G0283595	GO:0051703	32.4953	1.62369	0.00303767	intraspecies interaction between organisms	1	1	DDB_G0283595
DDB_G0283605	GO:0051703	32.4953	1.62369	0.00303767	intraspecies interaction between organisms	0	1	yakA
DDB_G0283615	GO:0051703	32.4953	1.62369	0.00303767	intraspecies interaction between organisms	0	1	rpkA
DDB_G0283699	GO:0051703	32.4953	1.62369	0.00303767	intraspecies interaction between organisms	0	1	phg2
DDB_G0283855	GO:0051703	32.4953	1.62369	0.00303767	intraspecies interaction between organisms	0	1	gpr89
DDB_G0283907	GO:0051703	32.4953	1.62369	0.00303767	intraspecies interaction between organisms	0	1	pkaC
DDB_G0283983	GO:0051703	32.4953	1.62369	0.00303767	intraspecies interaction between organisms	0	1	hfnA
DDB_G0284047	GO:0051703	32.4953	1.62369	0.00303767	intraspecies interaction between organisms	0	1	abcF2
DDB_G0284065	GO:0051703	32.4953	1.62369	0.00303767	intraspecies interaction between organisms	1	1	rapgap9
DDB_G0284171	GO:0051703	32.4953	1.62369	0.00303767	intraspecies interaction between organisms	0	1	chdA
DDB_G0284177	GO:0051703	32.4953	1.62369	0.00303767	intraspecies interaction between organisms	0	1	DDB_G0284177
DDB_G0284181	GO:0051703	32.4953	1.62369	0.00303767	intraspecies interaction between organisms	0	1	krsA
DDB_G0284183	GO:0051703	32.4953	1.62369	0.00303767	intraspecies interaction between organisms	0	1	mrfA
DDB_G0284329	GO:0051703	32.4953	1.62369	0.00303767	intraspecies interaction between organisms	0	1	gefA
DDB_G0284331	GO:0051703	32.4953	1.62369	0.00303767	intraspecies interaction between organisms	0	1	regA
DDB_G0284363	GO:0051703	32.4953	1.62369	0.00303767	intraspecies interaction between organisms	0	1	cf60
DDB_G0284465	GO:0051703	32.4953	1.62369	0.00303767	intraspecies interaction between organisms	0	1	cudA
DDB_G0284611	GO:0051703	32.4953	1.62369	0.00303767	intraspecies interaction between organisms	0	1	ripA
DDB_G0284619	GO:0051703	32.4953	1.62369	0.00303767	intraspecies interaction between organisms	0	1	DDB_G0284619
DDB_G0284659	GO:0051703	32.4953	1.62369	0.00303767	intraspecies interaction between organisms	0	1	tgrL1
DDB_G0284845	GO:0051703	32.4953	1.62369	0.00303767	intraspecies interaction between organisms	0	1	gxcC
DDB_G0284867	GO:0051703	32.4953	1.62369	0.00303767	intraspecies interaction between organisms	0	1	abcC8
DDB_G0284897	GO:0051703	32.4953	1.62369	0.00303767	intraspecies interaction between organisms	0	1	abkD
DDB_G0285083	GO:0051703	32.4953	1.62369	0.00303767	intraspecies interaction between organisms	1	1	DDB_G0285083
DDB_G0285161	GO:0051703	32.4953	1.62369	0.00303767	intraspecies interaction between organisms	0	1	dagA
DDB_G0285163	GO:0051703	32.4953	1.62369	0.00303767	intraspecies interaction between organisms	0	1	gacT
DDB_G0285165	GO:0051703	32.4953	1.62369	0.00303767	intraspecies interaction between organisms	0	1	abcC9
DDB_G0285175	GO:0051703	32.4953	1.62369	0.00303767	intraspecies interaction between organisms	0	1	vmp1
DDB_G0285253	GO:0051703	32.4953	1.62369	0.00303767	intraspecies interaction between organisms	0	1	scrA
DDB_G0285323	GO:0051703	32.4953	1.62369	0.00303767	intraspecies interaction between organisms	0	1	atg9
DDB_G0285845	GO:0051703	32.4953	1.62369	0.00303767	intraspecies interaction between organisms	0	1	phdA
DDB_G0285925	GO:0051703	32.4953	1.62369	0.00303767	intraspecies interaction between organisms	0	1	sunB
DDB_G0285939	GO:0051703	32.4953	1.62369	0.00303767	intraspecies interaction between organisms	0	1	ctnnA
DDB_G0285997	GO:0051703	32.4953	1.62369	0.00303767	intraspecies interaction between organisms	1	1	abcF1
DDB_G0286119	GO:0051703	32.4953	1.62369	0.00303767	intraspecies interaction between organisms	1	1	tagB
DDB_G0286303	GO:0051703	32.4953	1.62369	0.00303767	intraspecies interaction between organisms	0	1	ku80
DDB_G0286353	GO:0051703	32.4953	1.62369	0.00303767	intraspecies interaction between organisms	0	1	erkA
DDB_G0286355	GO:0051703	32.4953	1.62369	0.00303767	intraspecies interaction between organisms	0	1	mhcA
DDB_G0286359	GO:0051703	32.4953	1.62369	0.00303767	intraspecies interaction between organisms	0	1	svkA
DDB_G0286385	GO:0051703	32.4953	1.62369	0.00303767	intraspecies interaction between organisms	1	1	padA
DDB_G0286557	GO:0051703	32.4953	1.62369	0.00303767	intraspecies interaction between organisms	0	1	pten
DDB_G0286825	GO:0051703	32.4953	1.62369	0.00303767	intraspecies interaction between organisms	0	1	tgrD1
DDB_G0287101	GO:0051703	32.4953	1.62369	0.00303767	intraspecies interaction between organisms	0	1	noxB
DDB_G0287125	GO:0051703	32.4953	1.62369	0.00303767	intraspecies interaction between organisms	0	1	proA
DDB_G0287295	GO:0051703	32.4953	1.62369	0.00303767	intraspecies interaction between organisms	0	1	forC
DDB_G0287327	GO:0051703	32.4953	1.62369	0.00303767	intraspecies interaction between organisms	0	1	prmt5
DDB_G0287459	GO:0051703	32.4953	1.62369	0.00303767	intraspecies interaction between organisms	1	1	secG
DDB_G0287505	GO:0051703	32.4953	1.62369	0.00303767	intraspecies interaction between organisms	0	1	talB
DDB_G0287585	GO:0051703	32.4953	1.62369	0.00303767	intraspecies interaction between organisms	0	1	rgaA
DDB_G0287587	GO:0051703	32.4953	1.62369	0.00303767	intraspecies interaction between organisms	0	1	smlA
DDB_G0287593	GO:0051703	32.4953	1.62369	0.00303767	intraspecies interaction between organisms	0	1	abcC6
DDB_G0287691	GO:0051703	32.4953	1.62369	0.00303767	intraspecies interaction between organisms	0	1	abcC3
DDB_G0287969	GO:0051703	32.4953	1.62369	0.00303767	intraspecies interaction between organisms	0	1	cnrN
DDB_G0288047	GO:0051703	32.4953	1.62369	0.00303767	intraspecies interaction between organisms	1	1	dnmA
DDB_G0288249	GO:0051703	32.4953	1.62369	0.00303767	intraspecies interaction between organisms	1	1	mkpA
DDB_G0288251	GO:0051703	32.4953	1.62369	0.00303767	intraspecies interaction between organisms	0	1	roco4
DDB_G0288331	GO:0051703	32.4953	1.62369	0.00303767	intraspecies interaction between organisms	0	1	expl7
DDB_G0288457	GO:0051703	32.4953	1.62369	0.00303767	intraspecies interaction between organisms	0	1	pks26
DDB_G0288485	GO:0051703	32.4953	1.62369	0.00303767	intraspecies interaction between organisms	0	1	pikD
DDB_G0288495	GO:0051703	32.4953	1.62369	0.00303767	intraspecies interaction between organisms	0	1	smdA
DDB_G0288547	GO:0051703	32.4953	1.62369	0.00303767	intraspecies interaction between organisms	0	1	DDB_G0288547
DDB_G0288581	GO:0051703	32.4953	1.62369	0.00303767	intraspecies interaction between organisms	0	1	DDB_G0288581
DDB_G0288715	GO:0051703	32.4953	1.62369	0.00303767	intraspecies interaction between organisms	0	1	gadB
DDB_G0288755	GO:0051703	32.4953	1.62369	0.00303767	intraspecies interaction between organisms	1	1	gbfA
DDB_G0288771	GO:0051703	32.4953	1.62369	0.00303767	intraspecies interaction between organisms	0	1	darA
DDB_G0288877	GO:0051703	32.4953	1.62369	0.00303767	intraspecies interaction between organisms	0	1	aarA
DDB_G0289001	GO:0051703	32.4953	1.62369	0.00303767	intraspecies interaction between organisms	0	1	pyk3
DDB_G0289073	GO:0051703	32.4953	1.62369	0.00303767	intraspecies interaction between organisms	0	1	csaA
DDB_G0289121	GO:0051703	32.4953	1.62369	0.00303767	intraspecies interaction between organisms	0	1	pde4
DDB_G0289257	GO:0051703	32.4953	1.62369	0.00303767	intraspecies interaction between organisms	0	1	set1
DDB_G0289329	GO:0051703	32.4953	1.62369	0.00303767	intraspecies interaction between organisms	1	1	dmtA
DDB_G0289331	GO:0051703	32.4953	1.62369	0.00303767	intraspecies interaction between organisms	0	1	abcG16
DDB_G0289377	GO:0051703	32.4953	1.62369	0.00303767	intraspecies interaction between organisms	0	1	DDB_G0289377
DDB_G0289521	GO:0051703	32.4953	1.62369	0.00303767	intraspecies interaction between organisms	0	1	srsA
DDB_G0289653	GO:0051703	32.4953	1.62369	0.00303767	intraspecies interaction between organisms	0	1	noxA
DDB_G0289655	GO:0051703	32.4953	1.62369	0.00303767	intraspecies interaction between organisms	0	1	abcG7
DDB_G0289665	GO:0051703	32.4953	1.62369	0.00303767	intraspecies interaction between organisms	0	1	gefQ
DDB_G0289789	GO:0051703	32.4953	1.62369	0.00303767	intraspecies interaction between organisms	0	1	DDB_G0289789
DDB_G0289975	GO:0051703	32.4953	1.62369	0.00303767	intraspecies interaction between organisms	0	1	DDB_G0289975
DDB_G0290015	GO:0051703	32.4953	1.62369	0.00303767	intraspecies interaction between organisms	1	1	grxA
DDB_G0290165	GO:0051703	32.4953	1.62369	0.00303767	intraspecies interaction between organisms	0	1	bzpR
DDB_G0290453	GO:0051703	32.4953	1.62369	0.00303767	intraspecies interaction between organisms	1	1	usp12
DDB_G0290481	GO:0051703	32.4953	1.62369	0.00303767	intraspecies interaction between organisms	0	1	talA
DDB_G0290551	GO:0051703	32.4953	1.62369	0.00303767	intraspecies interaction between organisms	0	1	rblA
DDB_G0290825	GO:0051703	32.4953	1.62369	0.00303767	intraspecies interaction between organisms	0	1	chlA
DDB_G0290835	GO:0051703	32.4953	1.62369	0.00303767	intraspecies interaction between organisms	0	1	DDB_G0290835
DDB_G0290853	GO:0051703	32.4953	1.62369	0.00303767	intraspecies interaction between organisms	1	1	stlB
DDB_G0290959	GO:0051703	32.4953	1.62369	0.00303767	intraspecies interaction between organisms	1	1	chtC
DDB_G0291117	GO:0051703	32.4953	1.62369	0.00303767	intraspecies interaction between organisms	0	1	noxC
DDB_G0291157	GO:0051703	32.4953	1.62369	0.00303767	intraspecies interaction between organisms	0	1	cln3
DDB_G0291227	GO:0051703	32.4953	1.62369	0.00303767	intraspecies interaction between organisms	0	1	ctrA
DDB_G0291245	GO:0051703	32.4953	1.62369	0.00303767	intraspecies interaction between organisms	0	1	abcA6
DDB_G0291253	GO:0051703	32.4953	1.62369	0.00303767	intraspecies interaction between organisms	0	1	dia2
DDB_G0291303	GO:0051703	32.4953	1.62369	0.00303767	intraspecies interaction between organisms	0	1	frmA
DDB_G0291342	GO:0051703	32.4953	1.62369	0.00303767	intraspecies interaction between organisms	0	1	tacA
DDB_G0291352	GO:0051703	32.4953	1.62369	0.00303767	intraspecies interaction between organisms	0	1	psenA
DDB_G0291356	GO:0051703	32.4953	1.62369	0.00303767	intraspecies interaction between organisms	0	1	grlE
DDB_G0291372	GO:0051703	32.4953	1.62369	0.00303767	intraspecies interaction between organisms	0	1	dimB
DDB_G0291454	GO:0051703	32.4953	1.62369	0.00303767	intraspecies interaction between organisms	0	1	tgrC4
DDB_G0291714	GO:0051703	32.4953	1.62369	0.00303767	intraspecies interaction between organisms	1	1	abcB3
DDB_G0291788	GO:0051703	32.4953	1.62369	0.00303767	intraspecies interaction between organisms	0	1	adprt3
DDB_G0291926	GO:0051703	32.4953	1.62369	0.00303767	intraspecies interaction between organisms	0	1	DDB_G0291926
DDB_G0291972	GO:0051703	32.4953	1.62369	0.00303767	intraspecies interaction between organisms	0	1	culA
DDB_G0291974	GO:0051703	32.4953	1.62369	0.00303767	intraspecies interaction between organisms	0	1	docA
DDB_G0291980	GO:0051703	32.4953	1.62369	0.00303767	intraspecies interaction between organisms	1	1	abcA9
DDB_G0292148	GO:0051703	32.4953	1.62369	0.00303767	intraspecies interaction between organisms	0	1	DDB_G0292148
DDB_G0292162	GO:0051703	32.4953	1.62369	0.00303767	intraspecies interaction between organisms	1	1	DDB_G0292162
DDB_G0292206	GO:0051703	32.4953	1.62369	0.00303767	intraspecies interaction between organisms	0	1	manA
DDB_G0292260	GO:0051703	32.4953	1.62369	0.00303767	intraspecies interaction between organisms	0	1	DDB_G0292260_RTE
DDB_G0292268	GO:0051703	32.4953	1.62369	0.00303767	intraspecies interaction between organisms	0	1	rab2A
DDB_G0292270	GO:0051703	32.4953	1.62369	0.00303767	intraspecies interaction between organisms	0	1	comG
DDB_G0292310	GO:0051703	32.4953	1.62369	0.00303767	intraspecies interaction between organisms	0	1	psenB
DDB_G0292390	GO:0051703	32.4953	1.62369	0.00303767	intraspecies interaction between organisms	0	1	atg1
DDB_G0292436	GO:0051703	32.4953	1.62369	0.00303767	intraspecies interaction between organisms	0	1	triA
DDB_G0292562	GO:0051703	32.4953	1.62369	0.00303767	intraspecies interaction between organisms	1	1	tgrQ1
DDB_G0292564	GO:0051703	32.4953	1.62369	0.00303767	intraspecies interaction between organisms	0	1	iplA
DDB_G0292592	GO:0051703	32.4953	1.62369	0.00303767	intraspecies interaction between organisms	0	1	lst8
DDB_G0292736	GO:0051703	32.4953	1.62369	0.00303767	intraspecies interaction between organisms	0	1	plc
DDB_G0292986	GO:0051703	32.4953	1.62369	0.00303767	intraspecies interaction between organisms	0	1	abcG10
DDB_G0293008	GO:0051703	32.4953	1.62369	0.00303767	intraspecies interaction between organisms	0	1	cpnA
DDB_G0293012	GO:0051703	32.4953	1.62369	0.00303767	intraspecies interaction between organisms	0	1	chdC
DDB_G0293084	GO:0051703	32.4953	1.62369	0.00303767	intraspecies interaction between organisms	0	1	zizB
DDB_G0293192	GO:0051703	32.4953	1.62369	0.00303767	intraspecies interaction between organisms	0	1	DG1098
DDB_G0293194	GO:0051703	32.4953	1.62369	0.00303767	intraspecies interaction between organisms	0	1	abcD2
DDB_G0293302	GO:0051703	32.4953	1.62369	0.00303767	intraspecies interaction between organisms	0	1	DDB_G0293302
DDB_G0293416	GO:0051703	32.4953	1.62369	0.00303767	intraspecies interaction between organisms	0	1	abcB1
DDB_G0293436	GO:0051703	32.4953	1.62369	0.00303767	intraspecies interaction between organisms	0	1	abcA3
DDB_G0293522	GO:0051703	32.4953	1.62369	0.00303767	intraspecies interaction between organisms	0	1	ponA
DDB_G0293530	GO:0051703	32.4953	1.62369	0.00303767	intraspecies interaction between organisms	1	1	pefB
DDB_G0293544	GO:0051703	32.4953	1.62369	0.00303767	intraspecies interaction between organisms	0	1	cepK
DDB_G0293850	GO:0051703	32.4953	1.62369	0.00303767	intraspecies interaction between organisms	0	1	alrA
DDB_G0293904	GO:0051703	32.4953	1.62369	0.00303767	intraspecies interaction between organisms	0	1	redA
DDB_G0294046	GO:0051703	32.4953	1.62369	0.00303767	intraspecies interaction between organisms	0	1	mrps4
DDB_G0294407	GO:0051703	32.4953	1.62369	0.00303767	intraspecies interaction between organisms	0	1	helF
DDB_G0294515	GO:0051703	32.4953	1.62369	0.00303767	intraspecies interaction between organisms	1	1	dutA
DDB_G0294533	GO:0051703	32.4953	1.62369	0.00303767	intraspecies interaction between organisms	0	1	roco5
DDB_G0267376	GO:0003006	30.4386	1.6212	0.00400863	developmental process involved in reproduction	0	1	acrA
DDB_G0267384	GO:0003006	30.4386	1.6212	0.00400863	developmental process involved in reproduction	1	1	culB
DDB_G0267400	GO:0003006	30.4386	1.6212	0.00400863	developmental process involved in reproduction	0	1	hspD
DDB_G0267422	GO:0003006	30.4386	1.6212	0.00400863	developmental process involved in reproduction	0	1	tipC
DDB_G0267424	GO:0003006	30.4386	1.6212	0.00400863	developmental process involved in reproduction	1	1	amtC
DDB_G0267426	GO:0003006	30.4386	1.6212	0.00400863	developmental process involved in reproduction	0	1	cshA
DDB_G0267432	GO:0003006	30.4386	1.6212	0.00400863	developmental process involved in reproduction	0	1	abcG15
DDB_G0267436	GO:0003006	30.4386	1.6212	0.00400863	developmental process involved in reproduction	0	1	abcF4
DDB_G0267444	GO:0003006	30.4386	1.6212	0.00400863	developmental process involved in reproduction	0	1	phg1A
DDB_G0267460	GO:0003006	30.4386	1.6212	0.00400863	developmental process involved in reproduction	0	1	cybA
DDB_G0267462	GO:0003006	30.4386	1.6212	0.00400863	developmental process involved in reproduction	0	1	Dd5P4
DDB_G0267470	GO:0003006	30.4386	1.6212	0.00400863	developmental process involved in reproduction	0	1	dicB
DDB_G0267962	GO:0003006	30.4386	1.6212	0.00400863	developmental process involved in reproduction	0	1	tsuA
DDB_G0268144	GO:0003006	30.4386	1.6212	0.00400863	developmental process involved in reproduction	0	1	vwkA
DDB_G0268168	GO:0003006	30.4386	1.6212	0.00400863	developmental process involved in reproduction	1	1	png
DDB_G0268266	GO:0003006	30.4386	1.6212	0.00400863	developmental process involved in reproduction	0	1	DDB_G0268266
DDB_G0268446	GO:0003006	30.4386	1.6212	0.00400863	developmental process involved in reproduction	0	1	cbhA
DDB_G0268578	GO:0003006	30.4386	1.6212	0.00400863	developmental process involved in reproduction	1	1	gefV
DDB_G0268636	GO:0003006	30.4386	1.6212	0.00400863	developmental process involved in reproduction	0	1	roco11
DDB_G0268920	GO:0003006	30.4386	1.6212	0.00400863	developmental process involved in reproduction	0	1	mef2A
DDB_G0269100	GO:0003006	30.4386	1.6212	0.00400863	developmental process involved in reproduction	1	1	abpC
DDB_G0269108	GO:0003006	30.4386	1.6212	0.00400863	developmental process involved in reproduction	0	1	catB
DDB_G0269124	GO:0003006	30.4386	1.6212	0.00400863	developmental process involved in reproduction	0	1	dcsA
DDB_G0269152	GO:0003006	30.4386	1.6212	0.00400863	developmental process involved in reproduction	0	1	mekA
DDB_G0269154	GO:0003006	30.4386	1.6212	0.00400863	developmental process involved in reproduction	0	1	modA
DDB_G0269160	GO:0003006	30.4386	1.6212	0.00400863	developmental process involved in reproduction	0	1	nxnA
DDB_G0269166	GO:0003006	30.4386	1.6212	0.00400863	developmental process involved in reproduction	1	1	pakA
DDB_G0269184	GO:0003006	30.4386	1.6212	0.00400863	developmental process involved in reproduction	0	1	rzpA
DDB_G0269222	GO:0003006	30.4386	1.6212	0.00400863	developmental process involved in reproduction	0	1	gefB
DDB_G0269244	GO:0003006	30.4386	1.6212	0.00400863	developmental process involved in reproduction	0	1	atg6A
DDB_G0269248	GO:0003006	30.4386	1.6212	0.00400863	developmental process involved in reproduction	0	1	cf45-1
DDB_G0269364	GO:0003006	30.4386	1.6212	0.00400863	developmental process involved in reproduction	0	1	stlA
DDB_G0269610	GO:0003006	30.4386	1.6212	0.00400863	developmental process involved in reproduction	0	1	gxcT
DDB_G0269696	GO:0003006	30.4386	1.6212	0.00400863	developmental process involved in reproduction	0	1	pakD
DDB_G0269914	GO:0003006	30.4386	1.6212	0.00400863	developmental process involved in reproduction	0	1	tpp1
DDB_G0270024	GO:0003006	30.4386	1.6212	0.00400863	developmental process involved in reproduction	0	1	mgp2
DDB_G0270434	GO:0003006	30.4386	1.6212	0.00400863	developmental process involved in reproduction	0	1	med23
DDB_G0270756	GO:0003006	30.4386	1.6212	0.00400863	developmental process involved in reproduction	0	1	gtaG
DDB_G0270994	GO:0003006	30.4386	1.6212	0.00400863	developmental process involved in reproduction	1	1	psaA
DDB_G0271022	GO:0003006	30.4386	1.6212	0.00400863	developmental process involved in reproduction	0	1	adcC
DDB_G0271096	GO:0003006	30.4386	1.6212	0.00400863	developmental process involved in reproduction	0	1	atg7
DDB_G0271140	GO:0003006	30.4386	1.6212	0.00400863	developmental process involved in reproduction	0	1	abcA7
DDB_G0271346	GO:0003006	30.4386	1.6212	0.00400863	developmental process involved in reproduction	1	1	yod1
DDB_G0271500	GO:0003006	30.4386	1.6212	0.00400863	developmental process involved in reproduction	1	1	keaA
DDB_G0271502	GO:0003006	30.4386	1.6212	0.00400863	developmental process involved in reproduction	0	1	lvsD
DDB_G0271504	GO:0003006	30.4386	1.6212	0.00400863	developmental process involved in reproduction	1	1	lvsB
DDB_G0271586	GO:0003006	30.4386	1.6212	0.00400863	developmental process involved in reproduction	0	1	tgrK1
DDB_G0271598	GO:0003006	30.4386	1.6212	0.00400863	developmental process involved in reproduction	0	1	tgrS1
DDB_G0271626	GO:0003006	30.4386	1.6212	0.00400863	developmental process involved in reproduction	1	1	dotA
DDB_G0271646	GO:0003006	30.4386	1.6212	0.00400863	developmental process involved in reproduction	0	1	tgrK2
DDB_G0271654	GO:0003006	30.4386	1.6212	0.00400863	developmental process involved in reproduction	0	1	tgrK3
DDB_G0271684	GO:0003006	30.4386	1.6212	0.00400863	developmental process involved in reproduction	0	1	grlA
DDB_G0272002	GO:0003006	30.4386	1.6212	0.00400863	developmental process involved in reproduction	0	1	egeA
DDB_G0272038	GO:0003006	30.4386	1.6212	0.00400863	developmental process involved in reproduction	0	1	rgfA
DDB_G0272106	GO:0003006	30.4386	1.6212	0.00400863	developmental process involved in reproduction	0	1	arpB
DDB_G0272116	GO:0003006	30.4386	1.6212	0.00400863	developmental process involved in reproduction	0	1	ppp4c
DDB_G0272150	GO:0003006	30.4386	1.6212	0.00400863	developmental process involved in reproduction	0	1	grlJ
DDB_G0272344	GO:0003006	30.4386	1.6212	0.00400863	developmental process involved in reproduction	0	1	htt
DDB_G0272754	GO:0003006	30.4386	1.6212	0.00400863	developmental process involved in reproduction	0	1	gsr
DDB_G0272837	GO:0003006	30.4386	1.6212	0.00400863	developmental process involved in reproduction	0	1	ifkA
DDB_G0272861	GO:0003006	30.4386	1.6212	0.00400863	developmental process involved in reproduction	0	1	cosA
DDB_G0274103	GO:0003006	30.4386	1.6212	0.00400863	developmental process involved in reproduction	0	1	ggtA
DDB_G0274107	GO:0003006	30.4386	1.6212	0.00400863	developmental process involved in reproduction	0	1	sfbA
DDB_G0274119	GO:0003006	30.4386	1.6212	0.00400863	developmental process involved in reproduction	0	1	abcA5
DDB_G0274121	GO:0003006	30.4386	1.6212	0.00400863	developmental process involved in reproduction	1	1	abcA4
DDB_G0274139	GO:0003006	30.4386	1.6212	0.00400863	developmental process involved in reproduction	0	1	cycC
DDB_G0274177	GO:0003006	30.4386	1.6212	0.00400863	developmental process involved in reproduction	0	1	DDB_G0274177
DDB_G0274383	GO:0003006	30.4386	1.6212	0.00400863	developmental process involved in reproduction	0	1	pdeD
DDB_G0274395	GO:0003006	30.4386	1.6212	0.00400863	developmental process involved in reproduction	0	1	adcB
DDB_G0274577	GO:0003006	30.4386	1.6212	0.00400863	developmental process involved in reproduction	1	1	DG1124
DDB_G0274597	GO:0003006	30.4386	1.6212	0.00400863	developmental process involved in reproduction	0	1	ctnA
DDB_G0274741	GO:0003006	30.4386	1.6212	0.00400863	developmental process involved in reproduction	0	1	gnt15
DDB_G0274805	GO:0003006	30.4386	1.6212	0.00400863	developmental process involved in reproduction	0	1	ibrA
DDB_G0275045	GO:0003006	30.4386	1.6212	0.00400863	developmental process involved in reproduction	0	1	gpbB
DDB_G0275065	GO:0003006	30.4386	1.6212	0.00400863	developmental process involved in reproduction	0	1	dmpA
DDB_G0275077	GO:0003006	30.4386	1.6212	0.00400863	developmental process involved in reproduction	0	1	pks17
DDB_G0275437	GO:0003006	30.4386	1.6212	0.00400863	developmental process involved in reproduction	0	1	7E
DDB_G0275451	GO:0003006	30.4386	1.6212	0.00400863	developmental process involved in reproduction	1	1	alxA
DDB_G0275635	GO:0003006	30.4386	1.6212	0.00400863	developmental process involved in reproduction	0	1	pik6
DDB_G0275687	GO:0003006	30.4386	1.6212	0.00400863	developmental process involved in reproduction	1	1	abcG18
DDB_G0275689	GO:0003006	30.4386	1.6212	0.00400863	developmental process involved in reproduction	0	1	abcG2
DDB_G0275695	GO:0003006	30.4386	1.6212	0.00400863	developmental process involved in reproduction	0	1	ampA
DDB_G0275747	GO:0003006	30.4386	1.6212	0.00400863	developmental process involved in reproduction	0	1	DDB_G0275747
DDB_G0275815	GO:0003006	30.4386	1.6212	0.00400863	developmental process involved in reproduction	0	1	nrampB
DDB_G0275931	GO:0003006	30.4386	1.6212	0.00400863	developmental process involved in reproduction	0	1	ncsA
DDB_G0276025	GO:0003006	30.4386	1.6212	0.00400863	developmental process involved in reproduction	0	1	zakA
DDB_G0276077	GO:0003006	30.4386	1.6212	0.00400863	developmental process involved in reproduction	0	1	mlcR
DDB_G0276251	GO:0003006	30.4386	1.6212	0.00400863	developmental process involved in reproduction	1	1	DDB_G0276251
DDB_G0276267	GO:0003006	30.4386	1.6212	0.00400863	developmental process involved in reproduction	0	1	gpaB
DDB_G0276333	GO:0003006	30.4386	1.6212	0.00400863	developmental process involved in reproduction	0	1	tipB
DDB_G0276363	GO:0003006	30.4386	1.6212	0.00400863	developmental process involved in reproduction	0	1	myoG
DDB_G0276371	GO:0003006	30.4386	1.6212	0.00400863	developmental process involved in reproduction	0	1	gefL
DDB_G0276399	GO:0003006	30.4386	1.6212	0.00400863	developmental process involved in reproduction	0	1	rab8B
DDB_G0276465	GO:0003006	30.4386	1.6212	0.00400863	developmental process involved in reproduction	0	1	sepA
DDB_G0276883	GO:0003006	30.4386	1.6212	0.00400863	developmental process involved in reproduction	1	1	canA
DDB_G0276887	GO:0003006	30.4386	1.6212	0.00400863	developmental process involved in reproduction	0	1	fbxA
DDB_G0277071	GO:0003006	30.4386	1.6212	0.00400863	developmental process involved in reproduction	0	1	dupA
DDB_G0277075	GO:0003006	30.4386	1.6212	0.00400863	developmental process involved in reproduction	0	1	detA
DDB_G0277141	GO:0003006	30.4386	1.6212	0.00400863	developmental process involved in reproduction	0	1	cotC
DDB_G0277143	GO:0003006	30.4386	1.6212	0.00400863	developmental process involved in reproduction	0	1	gpbA
DDB_G0277165	GO:0003006	30.4386	1.6212	0.00400863	developmental process involved in reproduction	0	1	DDB_G0277165
DDB_G0277221	GO:0003006	30.4386	1.6212	0.00400863	developmental process involved in reproduction	0	1	chcA
DDB_G0277273	GO:0003006	30.4386	1.6212	0.00400863	developmental process involved in reproduction	0	1	phg1B
DDB_G0277399	GO:0003006	30.4386	1.6212	0.00400863	developmental process involved in reproduction	0	1	piaA
DDB_G0277403	GO:0003006	30.4386	1.6212	0.00400863	developmental process involved in reproduction	0	1	clc
DDB_G0277503	GO:0003006	30.4386	1.6212	0.00400863	developmental process involved in reproduction	0	1	amtA
DDB_G0277589	GO:0003006	30.4386	1.6212	0.00400863	developmental process involved in reproduction	0	1	gtaC
DDB_G0277829	GO:0003006	30.4386	1.6212	0.00400863	developmental process involved in reproduction	0	1	carC
DDB_G0277831	GO:0003006	30.4386	1.6212	0.00400863	developmental process involved in reproduction	0	1	carD
DDB_G0277843	GO:0003006	30.4386	1.6212	0.00400863	developmental process involved in reproduction	1	1	scaA
DDB_G0277859	GO:0003006	30.4386	1.6212	0.00400863	developmental process involved in reproduction	0	1	mlcE
DDB_G0277865	GO:0003006	30.4386	1.6212	0.00400863	developmental process involved in reproduction	1	1	ptpB
DDB_G0277871	GO:0003006	30.4386	1.6212	0.00400863	developmental process involved in reproduction	0	1	rsc12
DDB_G0277887	GO:0003006	30.4386	1.6212	0.00400863	developmental process involved in reproduction	0	1	dhkK
DDB_G0277987	GO:0003006	30.4386	1.6212	0.00400863	developmental process involved in reproduction	0	1	gxcA
DDB_G0278051	GO:0003006	30.4386	1.6212	0.00400863	developmental process involved in reproduction	0	1	elmoA
DDB_G0278333	GO:0003006	30.4386	1.6212	0.00400863	developmental process involved in reproduction	0	1	DDB_G0278333
DDB_G0278525	GO:0003006	30.4386	1.6212	0.00400863	developmental process involved in reproduction	0	1	plaA
DDB_G0278639	GO:0003006	30.4386	1.6212	0.00400863	developmental process involved in reproduction	0	1	clcD
DDB_G0278727	GO:0003006	30.4386	1.6212	0.00400863	developmental process involved in reproduction	0	1	pikA
DDB_G0278741	GO:0003006	30.4386	1.6212	0.00400863	developmental process involved in reproduction	0	1	adprt1A
DDB_G0278945	GO:0003006	30.4386	1.6212	0.00400863	developmental process involved in reproduction	1	1	DDB_G0278945
DDB_G0278971	GO:0003006	30.4386	1.6212	0.00400863	developmental process involved in reproduction	0	1	dimA
DDB_G0279483	GO:0003006	30.4386	1.6212	0.00400863	developmental process involved in reproduction	0	1	pldB
DDB_G0279629	GO:0003006	30.4386	1.6212	0.00400863	developmental process involved in reproduction	0	1	lkb1
DDB_G0279733	GO:0003006	30.4386	1.6212	0.00400863	developmental process involved in reproduction	1	1	gxcDD
DDB_G0279797	GO:0003006	30.4386	1.6212	0.00400863	developmental process involved in reproduction	1	1	ctnB
DDB_G0279915	GO:0003006	30.4386	1.6212	0.00400863	developmental process involved in reproduction	0	1	abcB4
DDB_G0279945	GO:0003006	30.4386	1.6212	0.00400863	developmental process involved in reproduction	0	1	DDB_G0279945
DDB_G0280043	GO:0003006	30.4386	1.6212	0.00400863	developmental process involved in reproduction	0	1	rab8A
DDB_G0280047	GO:0003006	30.4386	1.6212	0.00400863	developmental process involved in reproduction	0	1	yelA
DDB_G0280055	GO:0003006	30.4386	1.6212	0.00400863	developmental process involved in reproduction	0	1	abcC2
DDB_G0280267	GO:0003006	30.4386	1.6212	0.00400863	developmental process involved in reproduction	1	1	allC
DDB_G0280469	GO:0003006	30.4386	1.6212	0.00400863	developmental process involved in reproduction	1	1	psrA
DDB_G0280531	GO:0003006	30.4386	1.6212	0.00400863	developmental process involved in reproduction	0	1	tgrC1
DDB_G0280539	GO:0003006	30.4386	1.6212	0.00400863	developmental process involved in reproduction	0	1	abcC13
DDB_G0280547	GO:0003006	30.4386	1.6212	0.00400863	developmental process involved in reproduction	0	1	comH
DDB_G0280635	GO:0003006	30.4386	1.6212	0.00400863	developmental process involved in reproduction	0	1	tgrC2
DDB_G0280705	GO:0003006	30.4386	1.6212	0.00400863	developmental process involved in reproduction	0	1	chdB
DDB_G0280847	GO:0003006	30.4386	1.6212	0.00400863	developmental process involved in reproduction	0	1	2C
DDB_G0280961	GO:0003006	30.4386	1.6212	0.00400863	developmental process involved in reproduction	0	1	dhkA
DDB_G0280975	GO:0003006	30.4386	1.6212	0.00400863	developmental process involved in reproduction	0	1	racE
DDB_G0281385	GO:0003006	30.4386	1.6212	0.00400863	developmental process involved in reproduction	0	1	rasC
DDB_G0281387	GO:0003006	30.4386	1.6212	0.00400863	developmental process involved in reproduction	0	1	srfA
DDB_G0281389	GO:0003006	30.4386	1.6212	0.00400863	developmental process involved in reproduction	0	1	abcG6
DDB_G0281407	GO:0003006	30.4386	1.6212	0.00400863	developmental process involved in reproduction	0	1	tgrC5
DDB_G0281545	GO:0003006	30.4386	1.6212	0.00400863	developmental process involved in reproduction	0	1	acaA
DDB_G0281561	GO:0003006	30.4386	1.6212	0.00400863	developmental process involved in reproduction	0	1	tipA
DDB_G0281563	GO:0003006	30.4386	1.6212	0.00400863	developmental process involved in reproduction	0	1	mybC
DDB_G0281571	GO:0003006	30.4386	1.6212	0.00400863	developmental process involved in reproduction	0	1	comE
DDB_G0281605	GO:0003006	30.4386	1.6212	0.00400863	developmental process involved in reproduction	0	1	cfaD
DDB_G0281663	GO:0003006	30.4386	1.6212	0.00400863	developmental process involved in reproduction	0	1	aprA
DDB_G0281683	GO:0003006	30.4386	1.6212	0.00400863	developmental process involved in reproduction	1	1	msh3
DDB_G0281825	GO:0003006	30.4386	1.6212	0.00400863	developmental process involved in reproduction	0	1	comB
DDB_G0281891	GO:0003006	30.4386	1.6212	0.00400863	developmental process involved in reproduction	0	1	rbg3
DDB_G0282009	GO:0003006	30.4386	1.6212	0.00400863	developmental process involved in reproduction	0	1	ahhA
DDB_G0282093	GO:0003006	30.4386	1.6212	0.00400863	developmental process involved in reproduction	0	1	DDB_G0282093
DDB_G0282103	GO:0003006	30.4386	1.6212	0.00400863	developmental process involved in reproduction	0	1	abcG24
DDB_G0282375	GO:0003006	30.4386	1.6212	0.00400863	developmental process involved in reproduction	0	1	amiB
DDB_G0282419	GO:0003006	30.4386	1.6212	0.00400863	developmental process involved in reproduction	0	1	cyp508B1
DDB_G0282615	GO:0003006	30.4386	1.6212	0.00400863	developmental process involved in reproduction	0	1	midA
DDB_G0282819	GO:0003006	30.4386	1.6212	0.00400863	developmental process involved in reproduction	0	1	sglA
DDB_G0282923	GO:0003006	30.4386	1.6212	0.00400863	developmental process involved in reproduction	0	1	rdeA
DDB_G0283015	GO:0003006	30.4386	1.6212	0.00400863	developmental process involved in reproduction	0	1	DDB_G0283015
DDB_G0283263	GO:0003006	30.4386	1.6212	0.00400863	developmental process involved in reproduction	0	1	migA
DDB_G0283265	GO:0003006	30.4386	1.6212	0.00400863	developmental process involved in reproduction	0	1	mkkA
DDB_G0283345	GO:0003006	30.4386	1.6212	0.00400863	developmental process involved in reproduction	0	1	comD
DDB_G0283385	GO:0003006	30.4386	1.6212	0.00400863	developmental process involved in reproduction	1	1	splA
DDB_G0283387	GO:0003006	30.4386	1.6212	0.00400863	developmental process involved in reproduction	0	1	abcA10
DDB_G0283605	GO:0003006	30.4386	1.6212	0.00400863	developmental process involved in reproduction	0	1	yakA
DDB_G0283615	GO:0003006	30.4386	1.6212	0.00400863	developmental process involved in reproduction	0	1	rpkA
DDB_G0283699	GO:0003006	30.4386	1.6212	0.00400863	developmental process involved in reproduction	0	1	phg2
DDB_G0283855	GO:0003006	30.4386	1.6212	0.00400863	developmental process involved in reproduction	0	1	gpr89
DDB_G0283907	GO:0003006	30.4386	1.6212	0.00400863	developmental process involved in reproduction	0	1	pkaC
DDB_G0283983	GO:0003006	30.4386	1.6212	0.00400863	developmental process involved in reproduction	0	1	hfnA
DDB_G0284047	GO:0003006	30.4386	1.6212	0.00400863	developmental process involved in reproduction	0	1	abcF2
DDB_G0284065	GO:0003006	30.4386	1.6212	0.00400863	developmental process involved in reproduction	1	1	rapgap9
DDB_G0284171	GO:0003006	30.4386	1.6212	0.00400863	developmental process involved in reproduction	0	1	chdA
DDB_G0284177	GO:0003006	30.4386	1.6212	0.00400863	developmental process involved in reproduction	0	1	DDB_G0284177
DDB_G0284181	GO:0003006	30.4386	1.6212	0.00400863	developmental process involved in reproduction	0	1	krsA
DDB_G0284183	GO:0003006	30.4386	1.6212	0.00400863	developmental process involved in reproduction	0	1	mrfA
DDB_G0284329	GO:0003006	30.4386	1.6212	0.00400863	developmental process involved in reproduction	0	1	gefA
DDB_G0284331	GO:0003006	30.4386	1.6212	0.00400863	developmental process involved in reproduction	0	1	regA
DDB_G0284363	GO:0003006	30.4386	1.6212	0.00400863	developmental process involved in reproduction	0	1	cf60
DDB_G0284465	GO:0003006	30.4386	1.6212	0.00400863	developmental process involved in reproduction	0	1	cudA
DDB_G0284611	GO:0003006	30.4386	1.6212	0.00400863	developmental process involved in reproduction	0	1	ripA
DDB_G0284619	GO:0003006	30.4386	1.6212	0.00400863	developmental process involved in reproduction	0	1	DDB_G0284619
DDB_G0284659	GO:0003006	30.4386	1.6212	0.00400863	developmental process involved in reproduction	0	1	tgrL1
DDB_G0284845	GO:0003006	30.4386	1.6212	0.00400863	developmental process involved in reproduction	0	1	gxcC
DDB_G0284867	GO:0003006	30.4386	1.6212	0.00400863	developmental process involved in reproduction	0	1	abcC8
DDB_G0285083	GO:0003006	30.4386	1.6212	0.00400863	developmental process involved in reproduction	1	1	DDB_G0285083
DDB_G0285161	GO:0003006	30.4386	1.6212	0.00400863	developmental process involved in reproduction	0	1	dagA
DDB_G0285163	GO:0003006	30.4386	1.6212	0.00400863	developmental process involved in reproduction	0	1	gacT
DDB_G0285165	GO:0003006	30.4386	1.6212	0.00400863	developmental process involved in reproduction	0	1	abcC9
DDB_G0285175	GO:0003006	30.4386	1.6212	0.00400863	developmental process involved in reproduction	0	1	vmp1
DDB_G0285253	GO:0003006	30.4386	1.6212	0.00400863	developmental process involved in reproduction	0	1	scrA
DDB_G0285323	GO:0003006	30.4386	1.6212	0.00400863	developmental process involved in reproduction	0	1	atg9
DDB_G0285845	GO:0003006	30.4386	1.6212	0.00400863	developmental process involved in reproduction	0	1	phdA
DDB_G0285925	GO:0003006	30.4386	1.6212	0.00400863	developmental process involved in reproduction	0	1	sunB
DDB_G0285939	GO:0003006	30.4386	1.6212	0.00400863	developmental process involved in reproduction	0	1	ctnnA
DDB_G0285997	GO:0003006	30.4386	1.6212	0.00400863	developmental process involved in reproduction	1	1	abcF1
DDB_G0286119	GO:0003006	30.4386	1.6212	0.00400863	developmental process involved in reproduction	1	1	tagB
DDB_G0286303	GO:0003006	30.4386	1.6212	0.00400863	developmental process involved in reproduction	0	1	ku80
DDB_G0286353	GO:0003006	30.4386	1.6212	0.00400863	developmental process involved in reproduction	0	1	erkA
DDB_G0286355	GO:0003006	30.4386	1.6212	0.00400863	developmental process involved in reproduction	0	1	mhcA
DDB_G0286359	GO:0003006	30.4386	1.6212	0.00400863	developmental process involved in reproduction	0	1	svkA
DDB_G0286385	GO:0003006	30.4386	1.6212	0.00400863	developmental process involved in reproduction	1	1	padA
DDB_G0286557	GO:0003006	30.4386	1.6212	0.00400863	developmental process involved in reproduction	0	1	pten
DDB_G0286825	GO:0003006	30.4386	1.6212	0.00400863	developmental process involved in reproduction	0	1	tgrD1
DDB_G0287101	GO:0003006	30.4386	1.6212	0.00400863	developmental process involved in reproduction	0	1	noxB
DDB_G0287125	GO:0003006	30.4386	1.6212	0.00400863	developmental process involved in reproduction	0	1	proA
DDB_G0287295	GO:0003006	30.4386	1.6212	0.00400863	developmental process involved in reproduction	0	1	forC
DDB_G0287327	GO:0003006	30.4386	1.6212	0.00400863	developmental process involved in reproduction	0	1	prmt5
DDB_G0287459	GO:0003006	30.4386	1.6212	0.00400863	developmental process involved in reproduction	1	1	secG
DDB_G0287505	GO:0003006	30.4386	1.6212	0.00400863	developmental process involved in reproduction	0	1	talB
DDB_G0287585	GO:0003006	30.4386	1.6212	0.00400863	developmental process involved in reproduction	0	1	rgaA
DDB_G0287587	GO:0003006	30.4386	1.6212	0.00400863	developmental process involved in reproduction	0	1	smlA
DDB_G0287593	GO:0003006	30.4386	1.6212	0.00400863	developmental process involved in reproduction	0	1	abcC6
DDB_G0287691	GO:0003006	30.4386	1.6212	0.00400863	developmental process involved in reproduction	0	1	abcC3
DDB_G0287969	GO:0003006	30.4386	1.6212	0.00400863	developmental process involved in reproduction	0	1	cnrN
DDB_G0288047	GO:0003006	30.4386	1.6212	0.00400863	developmental process involved in reproduction	1	1	dnmA
DDB_G0288249	GO:0003006	30.4386	1.6212	0.00400863	developmental process involved in reproduction	1	1	mkpA
DDB_G0288251	GO:0003006	30.4386	1.6212	0.00400863	developmental process involved in reproduction	0	1	roco4
DDB_G0288331	GO:0003006	30.4386	1.6212	0.00400863	developmental process involved in reproduction	0	1	expl7
DDB_G0288485	GO:0003006	30.4386	1.6212	0.00400863	developmental process involved in reproduction	0	1	pikD
DDB_G0288495	GO:0003006	30.4386	1.6212	0.00400863	developmental process involved in reproduction	0	1	smdA
DDB_G0288581	GO:0003006	30.4386	1.6212	0.00400863	developmental process involved in reproduction	0	1	DDB_G0288581
DDB_G0288715	GO:0003006	30.4386	1.6212	0.00400863	developmental process involved in reproduction	0	1	gadB
DDB_G0288755	GO:0003006	30.4386	1.6212	0.00400863	developmental process involved in reproduction	1	1	gbfA
DDB_G0288771	GO:0003006	30.4386	1.6212	0.00400863	developmental process involved in reproduction	0	1	darA
DDB_G0288877	GO:0003006	30.4386	1.6212	0.00400863	developmental process involved in reproduction	0	1	aarA
DDB_G0289001	GO:0003006	30.4386	1.6212	0.00400863	developmental process involved in reproduction	0	1	pyk3
DDB_G0289073	GO:0003006	30.4386	1.6212	0.00400863	developmental process involved in reproduction	0	1	csaA
DDB_G0289121	GO:0003006	30.4386	1.6212	0.00400863	developmental process involved in reproduction	0	1	pde4
DDB_G0289257	GO:0003006	30.4386	1.6212	0.00400863	developmental process involved in reproduction	0	1	set1
DDB_G0289329	GO:0003006	30.4386	1.6212	0.00400863	developmental process involved in reproduction	1	1	dmtA
DDB_G0289331	GO:0003006	30.4386	1.6212	0.00400863	developmental process involved in reproduction	0	1	abcG16
DDB_G0289377	GO:0003006	30.4386	1.6212	0.00400863	developmental process involved in reproduction	0	1	DDB_G0289377
DDB_G0289521	GO:0003006	30.4386	1.6212	0.00400863	developmental process involved in reproduction	0	1	srsA
DDB_G0289653	GO:0003006	30.4386	1.6212	0.00400863	developmental process involved in reproduction	0	1	noxA
DDB_G0289655	GO:0003006	30.4386	1.6212	0.00400863	developmental process involved in reproduction	0	1	abcG7
DDB_G0289665	GO:0003006	30.4386	1.6212	0.00400863	developmental process involved in reproduction	0	1	gefQ
DDB_G0290015	GO:0003006	30.4386	1.6212	0.00400863	developmental process involved in reproduction	1	1	grxA
DDB_G0290165	GO:0003006	30.4386	1.6212	0.00400863	developmental process involved in reproduction	0	1	bzpR
DDB_G0290453	GO:0003006	30.4386	1.6212	0.00400863	developmental process involved in reproduction	1	1	usp12
DDB_G0290481	GO:0003006	30.4386	1.6212	0.00400863	developmental process involved in reproduction	0	1	talA
DDB_G0290551	GO:0003006	30.4386	1.6212	0.00400863	developmental process involved in reproduction	0	1	rblA
DDB_G0290825	GO:0003006	30.4386	1.6212	0.00400863	developmental process involved in reproduction	0	1	chlA
DDB_G0290835	GO:0003006	30.4386	1.6212	0.00400863	developmental process involved in reproduction	0	1	DDB_G0290835
DDB_G0290853	GO:0003006	30.4386	1.6212	0.00400863	developmental process involved in reproduction	1	1	stlB
DDB_G0291117	GO:0003006	30.4386	1.6212	0.00400863	developmental process involved in reproduction	0	1	noxC
DDB_G0291157	GO:0003006	30.4386	1.6212	0.00400863	developmental process involved in reproduction	0	1	cln3
DDB_G0291227	GO:0003006	30.4386	1.6212	0.00400863	developmental process involved in reproduction	0	1	ctrA
DDB_G0291245	GO:0003006	30.4386	1.6212	0.00400863	developmental process involved in reproduction	0	1	abcA6
DDB_G0291253	GO:0003006	30.4386	1.6212	0.00400863	developmental process involved in reproduction	0	1	dia2
DDB_G0291303	GO:0003006	30.4386	1.6212	0.00400863	developmental process involved in reproduction	0	1	frmA
DDB_G0291342	GO:0003006	30.4386	1.6212	0.00400863	developmental process involved in reproduction	0	1	tacA
DDB_G0291352	GO:0003006	30.4386	1.6212	0.00400863	developmental process involved in reproduction	0	1	psenA
DDB_G0291356	GO:0003006	30.4386	1.6212	0.00400863	developmental process involved in reproduction	0	1	grlE
DDB_G0291372	GO:0003006	30.4386	1.6212	0.00400863	developmental process involved in reproduction	0	1	dimB
DDB_G0291454	GO:0003006	30.4386	1.6212	0.00400863	developmental process involved in reproduction	0	1	tgrC4
DDB_G0291714	GO:0003006	30.4386	1.6212	0.00400863	developmental process involved in reproduction	1	1	abcB3
DDB_G0291788	GO:0003006	30.4386	1.6212	0.00400863	developmental process involved in reproduction	0	1	adprt3
DDB_G0291926	GO:0003006	30.4386	1.6212	0.00400863	developmental process involved in reproduction	0	1	DDB_G0291926
DDB_G0291972	GO:0003006	30.4386	1.6212	0.00400863	developmental process involved in reproduction	0	1	culA
DDB_G0291980	GO:0003006	30.4386	1.6212	0.00400863	developmental process involved in reproduction	1	1	abcA9
DDB_G0292162	GO:0003006	30.4386	1.6212	0.00400863	developmental process involved in reproduction	1	1	DDB_G0292162
DDB_G0292206	GO:0003006	30.4386	1.6212	0.00400863	developmental process involved in reproduction	0	1	manA
DDB_G0292260	GO:0003006	30.4386	1.6212	0.00400863	developmental process involved in reproduction	0	1	DDB_G0292260_RTE
DDB_G0292268	GO:0003006	30.4386	1.6212	0.00400863	developmental process involved in reproduction	0	1	rab2A
DDB_G0292270	GO:0003006	30.4386	1.6212	0.00400863	developmental process involved in reproduction	0	1	comG
DDB_G0292310	GO:0003006	30.4386	1.6212	0.00400863	developmental process involved in reproduction	0	1	psenB
DDB_G0292390	GO:0003006	30.4386	1.6212	0.00400863	developmental process involved in reproduction	0	1	atg1
DDB_G0292436	GO:0003006	30.4386	1.6212	0.00400863	developmental process involved in reproduction	0	1	triA
DDB_G0292562	GO:0003006	30.4386	1.6212	0.00400863	developmental process involved in reproduction	1	1	tgrQ1
DDB_G0292564	GO:0003006	30.4386	1.6212	0.00400863	developmental process involved in reproduction	0	1	iplA
DDB_G0292592	GO:0003006	30.4386	1.6212	0.00400863	developmental process involved in reproduction	0	1	lst8
DDB_G0292736	GO:0003006	30.4386	1.6212	0.00400863	developmental process involved in reproduction	0	1	plc
DDB_G0292986	GO:0003006	30.4386	1.6212	0.00400863	developmental process involved in reproduction	0	1	abcG10
DDB_G0293008	GO:0003006	30.4386	1.6212	0.00400863	developmental process involved in reproduction	0	1	cpnA
DDB_G0293012	GO:0003006	30.4386	1.6212	0.00400863	developmental process involved in reproduction	0	1	chdC
DDB_G0293084	GO:0003006	30.4386	1.6212	0.00400863	developmental process involved in reproduction	0	1	zizB
DDB_G0293192	GO:0003006	30.4386	1.6212	0.00400863	developmental process involved in reproduction	0	1	DG1098
DDB_G0293194	GO:0003006	30.4386	1.6212	0.00400863	developmental process involved in reproduction	0	1	abcD2
DDB_G0293302	GO:0003006	30.4386	1.6212	0.00400863	developmental process involved in reproduction	0	1	DDB_G0293302
DDB_G0293416	GO:0003006	30.4386	1.6212	0.00400863	developmental process involved in reproduction	0	1	abcB1
DDB_G0293436	GO:0003006	30.4386	1.6212	0.00400863	developmental process involved in reproduction	0	1	abcA3
[truncated: 9,670 more rows]

## Sheet: Ax_screen_over_BP
Gene_ID	GO_code	expCount	oddsRatio	p_value	GO_term	HL5_phenotype	start_library	Name
DDB_G0267450	GO:0006468	26.1799	1.90554	0.00030004	protein phosphorylation	0	1	pakC
DDB_G0267472	GO:0006468	26.1799	1.90554	0.00030004	protein phosphorylation	1	1	roco7
DDB_G0267514	GO:0006468	26.1799	1.90554	0.00030004	protein phosphorylation	0	1	DDB_G0267514
DDB_G0267540	GO:0006468	26.1799	1.90554	0.00030004	protein phosphorylation	1	1	scy1
DDB_G0267566	GO:0006468	26.1799	1.90554	0.00030004	protein phosphorylation	0	1	DDB_G0267566
DDB_G0267650	GO:0006468	26.1799	1.90554	0.00030004	protein phosphorylation	0	1	ireA
DDB_G0267686	GO:0006468	26.1799	1.90554	0.00030004	protein phosphorylation	0	1	DDB_G0267686
DDB_G0267760	GO:0006468	26.1799	1.90554	0.00030004	protein phosphorylation	0	1	tbck
DDB_G0267774	GO:0006468	26.1799	1.90554	0.00030004	protein phosphorylation	1	1	abkC
DDB_G0267934	GO:0006468	26.1799	1.90554	0.00030004	protein phosphorylation	1	1	fnkB
DDB_G0267962	GO:0006468	26.1799	1.90554	0.00030004	protein phosphorylation	0	1	tsuA
DDB_G0267978	GO:0006468	26.1799	1.90554	0.00030004	protein phosphorylation	0	1	krsB
DDB_G0268088	GO:0006468	26.1799	1.90554	0.00030004	protein phosphorylation	1	1	lvsG
DDB_G0268144	GO:0006468	26.1799	1.90554	0.00030004	protein phosphorylation	0	1	vwkA
DDB_G0268550	GO:0006468	26.1799	1.90554	0.00030004	protein phosphorylation	0	1	DDB_G0268550
DDB_G0268636	GO:0006468	26.1799	1.90554	0.00030004	protein phosphorylation	0	1	roco11
DDB_G0268642	GO:0006468	26.1799	1.90554	0.00030004	protein phosphorylation	0	1	DDB_G0268642
DDB_G0268656	GO:0006468	26.1799	1.90554	0.00030004	protein phosphorylation	1	1	DDB_G0268656
DDB_G0268748	GO:0006468	26.1799	1.90554	0.00030004	protein phosphorylation	0	1	DDB_G0268748
DDB_G0268876	GO:0006468	26.1799	1.90554	0.00030004	protein phosphorylation	1	1	DDB_G0268876
DDB_G0269152	GO:0006468	26.1799	1.90554	0.00030004	protein phosphorylation	0	1	mekA
DDB_G0269166	GO:0006468	26.1799	1.90554	0.00030004	protein phosphorylation	0	1	pakA
DDB_G0269204	GO:0006468	26.1799	1.90554	0.00030004	protein phosphorylation	0	1	dhkE
DDB_G0269250	GO:0006468	26.1799	1.90554	0.00030004	protein phosphorylation	1	1	pats1
DDB_G0269628	GO:0006468	26.1799	1.90554	0.00030004	protein phosphorylation	0	1	DDB_G0269628
DDB_G0269632	GO:0006468	26.1799	1.90554	0.00030004	protein phosphorylation	0	1	irlD
DDB_G0269696	GO:0006468	26.1799	1.90554	0.00030004	protein phosphorylation	0	1	pakD
DDB_G0269876	GO:0006468	26.1799	1.90554	0.00030004	protein phosphorylation	0	1	samkA
DDB_G0270102	GO:0006468	26.1799	1.90554	0.00030004	protein phosphorylation	1	1	mkcF
DDB_G0270218	GO:0006468	26.1799	1.90554	0.00030004	protein phosphorylation	0	1	glkA
DDB_G0270444	GO:0006468	26.1799	1.90554	0.00030004	protein phosphorylation	0	1	DDB_G0270444
DDB_G0270544	GO:0006468	26.1799	1.90554	0.00030004	protein phosphorylation	0	1	gdt6
DDB_G0270550	GO:0006468	26.1799	1.90554	0.00030004	protein phosphorylation	0	1	gdt4
DDB_G0270658	GO:0006468	26.1799	1.90554	0.00030004	protein phosphorylation	0	1	acbA
DDB_G0270666	GO:0006468	26.1799	1.90554	0.00030004	protein phosphorylation	0	1	gdt2
DDB_G0270668	GO:0006468	26.1799	1.90554	0.00030004	protein phosphorylation	0	1	gdt8
DDB_G0270678	GO:0006468	26.1799	1.90554	0.00030004	protein phosphorylation	0	1	samkC
DDB_G0270814	GO:0006468	26.1799	1.90554	0.00030004	protein phosphorylation	0	1	nek2
DDB_G0270894	GO:0006468	26.1799	1.90554	0.00030004	protein phosphorylation	0	1	irlC
DDB_G0271022	GO:0006468	26.1799	1.90554	0.00030004	protein phosphorylation	0	1	adcC
DDB_G0271538	GO:0006468	26.1799	1.90554	0.00030004	protein phosphorylation	0	1	DDB_G0271538
DDB_G0271550	GO:0006468	26.1799	1.90554	0.00030004	protein phosphorylation	1	1	DDB_G0271550
DDB_G0271682	GO:0006468	26.1799	1.90554	0.00030004	protein phosphorylation	0	1	DDB_G0271682
DDB_G0272092	GO:0006468	26.1799	1.90554	0.00030004	protein phosphorylation	0	1	DDB_G0272092
DDB_G0272254	GO:0006468	26.1799	1.90554	0.00030004	protein phosphorylation	0	1	DDB_G0272254
DDB_G0272282	GO:0006468	26.1799	1.90554	0.00030004	protein phosphorylation	1	1	DDB_G0272282
DDB_G0272837	GO:0006468	26.1799	1.90554	0.00030004	protein phosphorylation	0	1	ifkA
DDB_G0272987	GO:0006468	26.1799	1.90554	0.00030004	protein phosphorylation	1	1	irlA
DDB_G0274101	GO:0006468	26.1799	1.90554	0.00030004	protein phosphorylation	1	1	dokA
DDB_G0274139	GO:0006468	26.1799	1.90554	0.00030004	protein phosphorylation	0	1	cycC
DDB_G0274191	GO:0006468	26.1799	1.90554	0.00030004	protein phosphorylation	0	1	dhkC
DDB_G0274395	GO:0006468	26.1799	1.90554	0.00030004	protein phosphorylation	0	1	adcB
DDB_G0274409	GO:0006468	26.1799	1.90554	0.00030004	protein phosphorylation	0	1	pakF
DDB_G0274437	GO:0006468	26.1799	1.90554	0.00030004	protein phosphorylation	0	1	twfA
DDB_G0274503	GO:0006468	26.1799	1.90554	0.00030004	protein phosphorylation	0	1	plk
DDB_G0274569	GO:0006468	26.1799	1.90554	0.00030004	protein phosphorylation	0	1	acgA
DDB_G0274593	GO:0006468	26.1799	1.90554	0.00030004	protein phosphorylation	0	1	dst1
DDB_G0274613	GO:0006468	26.1799	1.90554	0.00030004	protein phosphorylation	0	1	DDB_G0274613
DDB_G0274821	GO:0006468	26.1799	1.90554	0.00030004	protein phosphorylation	0	1	DDB_G0274821
DDB_G0275057	GO:0006468	26.1799	1.90554	0.00030004	protein phosphorylation	0	1	DDB_G0275057
DDB_G0275165	GO:0006468	26.1799	1.90554	0.00030004	protein phosphorylation	0	1	DDB_G0275165
DDB_G0275241	GO:0006468	26.1799	1.90554	0.00030004	protein phosphorylation	0	1	nek3
DDB_G0275561	GO:0006468	26.1799	1.90554	0.00030004	protein phosphorylation	0	1	fnkA
DDB_G0275627	GO:0006468	26.1799	1.90554	0.00030004	protein phosphorylation	0	1	sky1
DDB_G0275845	GO:0006468	26.1799	1.90554	0.00030004	protein phosphorylation	0	1	smg1
DDB_G0275879	GO:0006468	26.1799	1.90554	0.00030004	protein phosphorylation	1	1	fnkE
DDB_G0276025	GO:0006468	26.1799	1.90554	0.00030004	protein phosphorylation	0	1	zakA
DDB_G0276043	GO:0006468	26.1799	1.90554	0.00030004	protein phosphorylation	0	1	ifkC
DDB_G0276143	GO:0006468	26.1799	1.90554	0.00030004	protein phosphorylation	0	1	dhkF
DDB_G0276157	GO:0006468	26.1799	1.90554	0.00030004	protein phosphorylation	0	1	pkgA
DDB_G0276181	GO:0006468	26.1799	1.90554	0.00030004	protein phosphorylation	0	1	DDB_G0276181
DDB_G0276349	GO:0006468	26.1799	1.90554	0.00030004	protein phosphorylation	0	1	fnkC
DDB_G0276435	GO:0006468	26.1799	1.90554	0.00030004	protein phosphorylation	1	1	NA
DDB_G0276465	GO:0006468	26.1799	1.90554	0.00030004	protein phosphorylation	0	1	sepA
DDB_G0276527	GO:0006468	26.1799	1.90554	0.00030004	protein phosphorylation	0	1	DDB_G0276527
DDB_G0276577	GO:0006468	26.1799	1.90554	0.00030004	protein phosphorylation	0	1	fray2
DDB_G0276885	GO:0006468	26.1799	1.90554	0.00030004	protein phosphorylation	0	1	casK
DDB_G0277071	GO:0006468	26.1799	1.90554	0.00030004	protein phosphorylation	0	1	dupA
DDB_G0277145	GO:0006468	26.1799	1.90554	0.00030004	protein phosphorylation	1	1	pkaD
DDB_G0277165	GO:0006468	26.1799	1.90554	0.00030004	protein phosphorylation	0	1	DDB_G0277165
DDB_G0277223	GO:0006468	26.1799	1.90554	0.00030004	protein phosphorylation	0	1	dgkA
DDB_G0277399	GO:0006468	26.1799	1.90554	0.00030004	protein phosphorylation	0	1	piaA
DDB_G0277449	GO:0006468	26.1799	1.90554	0.00030004	protein phosphorylation	1	1	DDB_G0277449
DDB_G0277539	GO:0006468	26.1799	1.90554	0.00030004	protein phosphorylation	1	1	DDB_G0277539
DDB_G0277667	GO:0006468	26.1799	1.90554	0.00030004	protein phosphorylation	0	1	DDB_G0277667
DDB_G0277845	GO:0006468	26.1799	1.90554	0.00030004	protein phosphorylation	1	1	dhkB
DDB_G0277883	GO:0006468	26.1799	1.90554	0.00030004	protein phosphorylation	0	1	dhkJ
DDB_G0277887	GO:0006468	26.1799	1.90554	0.00030004	protein phosphorylation	0	1	dhkK
DDB_G0277905	GO:0006468	26.1799	1.90554	0.00030004	protein phosphorylation	0	1	snfA
DDB_G0277989	GO:0006468	26.1799	1.90554	0.00030004	protein phosphorylation	0	1	DDB_G0277989
DDB_G0278457	GO:0006468	26.1799	1.90554	0.00030004	protein phosphorylation	0	1	ndrA
DDB_G0278487	GO:0006468	26.1799	1.90554	0.00030004	protein phosphorylation	0	1	DDB_G0278487
DDB_G0278509	GO:0006468	26.1799	1.90554	0.00030004	protein phosphorylation	0	1	DDB_G0278509
DDB_G0278521	GO:0006468	26.1799	1.90554	0.00030004	protein phosphorylation	0	1	DDB_G0278521
DDB_G0278535	GO:0006468	26.1799	1.90554	0.00030004	protein phosphorylation	0	1	DDB_G0278535
DDB_G0278665	GO:0006468	26.1799	1.90554	0.00030004	protein phosphorylation	0	1	DDB_G0278665
DDB_G0278723	GO:0006468	26.1799	1.90554	0.00030004	protein phosphorylation	0	1	gdt1
DDB_G0278737	GO:0006468	26.1799	1.90554	0.00030004	protein phosphorylation	0	1	rckA
DDB_G0278783	GO:0006468	26.1799	1.90554	0.00030004	protein phosphorylation	0	1	elp4
DDB_G0278845	GO:0006468	26.1799	1.90554	0.00030004	protein phosphorylation	0	1	DDB_G0278845
DDB_G0278863	GO:0006468	26.1799	1.90554	0.00030004	protein phosphorylation	1	1	fray1
DDB_G0278879	GO:0006468	26.1799	1.90554	0.00030004	protein phosphorylation	1	1	gdt9
DDB_G0278901	GO:0006468	26.1799	1.90554	0.00030004	protein phosphorylation	1	1	DDB_G0278901
DDB_G0278909	GO:0006468	26.1799	1.90554	0.00030004	protein phosphorylation	0	1	DDB_G0278909
DDB_G0278921	GO:0006468	26.1799	1.90554	0.00030004	protein phosphorylation	0	1	DDB_G0278921
DDB_G0279343	GO:0006468	26.1799	1.90554	0.00030004	protein phosphorylation	0	1	aurK
DDB_G0279417	GO:0006468	26.1799	1.90554	0.00030004	protein phosphorylation	0	1	roco6
DDB_G0279629	GO:0006468	26.1799	1.90554	0.00030004	protein phosphorylation	0	1	lkb1
DDB_G0279719	GO:0006468	26.1799	1.90554	0.00030004	protein phosphorylation	0	1	DDB_G0279719
DDB_G0279761	GO:0006468	26.1799	1.90554	0.00030004	protein phosphorylation	0	1	DDB_G0279761
DDB_G0279831	GO:0006468	26.1799	1.90554	0.00030004	protein phosphorylation	0	1	DDB_G0279831
DDB_G0279913	GO:0006468	26.1799	1.90554	0.00030004	protein phosphorylation	0	1	dhkH
DDB_G0279925	GO:0006468	26.1799	1.90554	0.00030004	protein phosphorylation	0	1	mlkA
DDB_G0280111	GO:0006468	26.1799	1.90554	0.00030004	protein phosphorylation	0	1	DDB_G0280111
DDB_G0280131	GO:0006468	26.1799	1.90554	0.00030004	protein phosphorylation	0	1	DDB_G0280131
DDB_G0280133	GO:0006468	26.1799	1.90554	0.00030004	protein phosphorylation	0	1	DDB_G0280133
DDB_G0280193	GO:0006468	26.1799	1.90554	0.00030004	protein phosphorylation	0	1	DDB_G0280193
DDB_G0280321	GO:0006468	26.1799	1.90554	0.00030004	protein phosphorylation	0	1	fhkE
DDB_G0280425	GO:0006468	26.1799	1.90554	0.00030004	protein phosphorylation	0	1	DDB_G0280425
DDB_G0280431	GO:0006468	26.1799	1.90554	0.00030004	protein phosphorylation	0	1	rio1
DDB_G0280461	GO:0006468	26.1799	1.90554	0.00030004	protein phosphorylation	1	1	DDB_G0280461
DDB_G0280469	GO:0006468	26.1799	1.90554	0.00030004	protein phosphorylation	0	1	psrA
DDB_G0280557	GO:0006468	26.1799	1.90554	0.00030004	protein phosphorylation	0	1	DDB_G0280557
DDB_G0280599	GO:0006468	26.1799	1.90554	0.00030004	protein phosphorylation	1	1	fhkB
DDB_G0280643	GO:0006468	26.1799	1.90554	0.00030004	protein phosphorylation	0	1	DDB_G0280643
DDB_G0280717	GO:0006468	26.1799	1.90554	0.00030004	protein phosphorylation	0	1	DDB_G0280717
DDB_G0280855	GO:0006468	26.1799	1.90554	0.00030004	protein phosphorylation	0	1	DDB_G0280855
DDB_G0280961	GO:0006468	26.1799	1.90554	0.00030004	protein phosphorylation	0	1	dhkA
DDB_G0280995	GO:0006468	26.1799	1.90554	0.00030004	protein phosphorylation	0	1	mps1
DDB_G0281167	GO:0006468	26.1799	1.90554	0.00030004	protein phosphorylation	1	1	dnapkcs
DDB_G0281179	GO:0006468	26.1799	1.90554	0.00030004	protein phosphorylation	0	1	clkA
DDB_G0281331	GO:0006468	26.1799	1.90554	0.00030004	protein phosphorylation	1	1	DDB_G0281331
DDB_G0281343	GO:0006468	26.1799	1.90554	0.00030004	protein phosphorylation	0	1	shkD
DDB_G0281385	GO:0006468	26.1799	1.90554	0.00030004	protein phosphorylation	0	1	rasC
DDB_G0281387	GO:0006468	26.1799	1.90554	0.00030004	protein phosphorylation	0	1	srfA
DDB_G0281471	GO:0006468	26.1799	1.90554	0.00030004	protein phosphorylation	0	1	pdkA
DDB_G0281557	GO:0006468	26.1799	1.90554	0.00030004	protein phosphorylation	0	1	drkD
DDB_G0281567	GO:0006468	26.1799	1.90554	0.00030004	protein phosphorylation	0	1	fhkC
DDB_G0281569	GO:0006468	26.1799	1.90554	0.00030004	protein phosphorylation	0	1	tor
DDB_G0281799	GO:0006468	26.1799	1.90554	0.00030004	protein phosphorylation	0	1	abkB
DDB_G0281863	GO:0006468	26.1799	1.90554	0.00030004	protein phosphorylation	0	1	slob1
DDB_G0281895	GO:0006468	26.1799	1.90554	0.00030004	protein phosphorylation	0	1	mrkC
DDB_G0281899	GO:0006468	26.1799	1.90554	0.00030004	protein phosphorylation	0	1	drkC
DDB_G0281947	GO:0006468	26.1799	1.90554	0.00030004	protein phosphorylation	0	1	tra1
DDB_G0282145	GO:0006468	26.1799	1.90554	0.00030004	protein phosphorylation	0	1	ptpC
DDB_G0282377	GO:0006468	26.1799	1.90554	0.00030004	protein phosphorylation	1	1	dhkM
DDB_G0282417	GO:0006468	26.1799	1.90554	0.00030004	protein phosphorylation	0	1	DDB_G0282417
DDB_G0282489	GO:0006468	26.1799	1.90554	0.00030004	protein phosphorylation	1	1	mhkD
DDB_G0282627	GO:0006468	26.1799	1.90554	0.00030004	protein phosphorylation	0	1	vps15
DDB_G0282777	GO:0006468	26.1799	1.90554	0.00030004	protein phosphorylation	0	1	DDB_G0282777
DDB_G0282891	GO:0006468	26.1799	1.90554	0.00030004	protein phosphorylation	0	1	pakG
DDB_G0282895	GO:0006468	26.1799	1.90554	0.00030004	protein phosphorylation	0	1	DDB_G0282895
DDB_G0282927	GO:0006468	26.1799	1.90554	0.00030004	protein phosphorylation	0	1	dhkL
DDB_G0282963	GO:0006468	26.1799	1.90554	0.00030004	protein phosphorylation	0	1	DDB_G0282963
DDB_G0283065	GO:0006468	26.1799	1.90554	0.00030004	protein phosphorylation	1	1	DDB_G0283065
DDB_G0283109	GO:0006468	26.1799	1.90554	0.00030004	protein phosphorylation	0	1	iksA
DDB_G0283265	GO:0006468	26.1799	1.90554	0.00030004	protein phosphorylation	0	1	mkkA
DDB_G0283267	GO:0006468	26.1799	1.90554	0.00030004	protein phosphorylation	0	1	shkA
DDB_G0283337	GO:0006468	26.1799	1.90554	0.00030004	protein phosphorylation	0	1	DDB_G0283337
DDB_G0283385	GO:0006468	26.1799	1.90554	0.00030004	protein phosphorylation	0	1	splA
DDB_G0283391	GO:0006468	26.1799	1.90554	0.00030004	protein phosphorylation	0	1	kinX
DDB_G0283397	GO:0006468	26.1799	1.90554	0.00030004	protein phosphorylation	0	1	DDB_G0283397
DDB_G0283605	GO:0006468	26.1799	1.90554	0.00030004	protein phosphorylation	0	1	yakA
DDB_G0283699	GO:0006468	26.1799	1.90554	0.00030004	protein phosphorylation	0	1	phg2
DDB_G0283821	GO:0006468	26.1799	1.90554	0.00030004	protein phosphorylation	0	1	DDB_G0283821
DDB_G0283907	GO:0006468	26.1799	1.90554	0.00030004	protein phosphorylation	0	1	pkaC
DDB_G0284029	GO:0006468	26.1799	1.90554	0.00030004	protein phosphorylation	0	1	pkgD
DDB_G0284045	GO:0006468	26.1799	1.90554	0.00030004	protein phosphorylation	0	1	dhkG
DDB_G0284181	GO:0006468	26.1799	1.90554	0.00030004	protein phosphorylation	0	1	krsA
DDB_G0284489	GO:0006468	26.1799	1.90554	0.00030004	protein phosphorylation	1	1	pdkB
DDB_G0284491	GO:0006468	26.1799	1.90554	0.00030004	protein phosphorylation	0	1	DDB_G0284491
DDB_G0284611	GO:0006468	26.1799	1.90554	0.00030004	protein phosphorylation	0	1	ripA
DDB_G0284839	GO:0006468	26.1799	1.90554	0.00030004	protein phosphorylation	1	1	ndrC
DDB_G0284859	GO:0006468	26.1799	1.90554	0.00030004	protein phosphorylation	1	1	samkB
DDB_G0284897	GO:0006468	26.1799	1.90554	0.00030004	protein phosphorylation	1	1	abkD
DDB_G0285427	GO:0006468	26.1799	1.90554	0.00030004	protein phosphorylation	0	1	mkcA
DDB_G0285463	GO:0006468	26.1799	1.90554	0.00030004	protein phosphorylation	0	1	DDB_G0285463
DDB_G0285643	GO:0006468	26.1799	1.90554	0.00030004	protein phosphorylation	0	1	mrkB
DDB_G0285963	GO:0006468	26.1799	1.90554	0.00030004	protein phosphorylation	0	1	fhkD
DDB_G0286125	GO:0006468	26.1799	1.90554	0.00030004	protein phosphorylation	0	1	pkgC
DDB_G0286127	GO:0006468	26.1799	1.90554	0.00030004	protein phosphorylation	0	1	roco8
DDB_G0286347	GO:0006468	26.1799	1.90554	0.00030004	protein phosphorylation	0	1	DDB_G0286347
DDB_G0286353	GO:0006468	26.1799	1.90554	0.00030004	protein phosphorylation	0	1	erkA
DDB_G0286359	GO:0006468	26.1799	1.90554	0.00030004	protein phosphorylation	0	1	svkA
DDB_G0286465	GO:0006468	26.1799	1.90554	0.00030004	protein phosphorylation	0	1	DDB_G0286465
DDB_G0286481	GO:0006468	26.1799	1.90554	0.00030004	protein phosphorylation	0	1	DDB_G0286481
DDB_G0286485	GO:0006468	26.1799	1.90554	0.00030004	protein phosphorylation	0	1	DDB_G0286485
DDB_G0286557	GO:0006468	26.1799	1.90554	0.00030004	protein phosphorylation	0	1	pten
DDB_G0286617	GO:0006468	26.1799	1.90554	0.00030004	protein phosphorylation	0	1	cycK
DDB_G0286627	GO:0006468	26.1799	1.90554	0.00030004	protein phosphorylation	0	1	DDB_G0286627
DDB_G0286841	GO:0006468	26.1799	1.90554	0.00030004	protein phosphorylation	0	1	DDB_G0286841
DDB_G0287001	GO:0006468	26.1799	1.90554	0.00030004	protein phosphorylation	0	1	DDB_G0287001
DDB_G0287745	GO:0006468	26.1799	1.90554	0.00030004	protein phosphorylation	0	1	DDB_G0287745
DDB_G0287853	GO:0006468	26.1799	1.90554	0.00030004	protein phosphorylation	0	1	mkcC
DDB_G0287929	GO:0006468	26.1799	1.90554	0.00030004	protein phosphorylation	0	1	NA
DDB_G0288071	GO:0006468	26.1799	1.90554	0.00030004	protein phosphorylation	0	1	dst4
DDB_G0288147	GO:0006468	26.1799	1.90554	0.00030004	protein phosphorylation	0	1	pkcA
DDB_G0288183	GO:0006468	26.1799	1.90554	0.00030004	protein phosphorylation	0	1	roco9
DDB_G0288251	GO:0006468	26.1799	1.90554	0.00030004	protein phosphorylation	0	1	roco4
DDB_G0288617	GO:0006468	26.1799	1.90554	0.00030004	protein phosphorylation	0	1	shkB
DDB_G0288795	GO:0006468	26.1799	1.90554	0.00030004	protein phosphorylation	0	1	DDB_G0288795
DDB_G0288803	GO:0006468	26.1799	1.90554	0.00030004	protein phosphorylation	1	1	irlE
DDB_G0289001	GO:0006468	26.1799	1.90554	0.00030004	protein phosphorylation	0	1	pyk3
DDB_G0289115	GO:0006468	26.1799	1.90554	0.00030004	protein phosphorylation	1	1	mhkB
DDB_G0289119	GO:0006468	26.1799	1.90554	0.00030004	protein phosphorylation	0	1	pXi
DDB_G0289179	GO:0006468	26.1799	1.90554	0.00030004	protein phosphorylation	0	1	thyB
DDB_G0289543	GO:0006468	26.1799	1.90554	0.00030004	protein phosphorylation	0	1	ndrD
DDB_G0289555	GO:0006468	26.1799	1.90554	0.00030004	protein phosphorylation	0	1	arkA
DDB_G0289591	GO:0006468	26.1799	1.90554	0.00030004	protein phosphorylation	1	1	NA
DDB_G0289615	GO:0006468	26.1799	1.90554	0.00030004	protein phosphorylation	0	1	NA
DDB_G0289661	GO:0006468	26.1799	1.90554	0.00030004	protein phosphorylation	0	1	kinY
DDB_G0289709	GO:0006468	26.1799	1.90554	0.00030004	protein phosphorylation	0	1	drkB
DDB_G0289791	GO:0006468	26.1799	1.90554	0.00030004	protein phosphorylation	0	1	drkA
DDB_G0289859	GO:0006468	26.1799	1.90554	0.00030004	protein phosphorylation	0	1	kxcA
DDB_G0290451	GO:0006468	26.1799	1.90554	0.00030004	protein phosphorylation	0	1	shkE
DDB_G0290529	GO:0006468	26.1799	1.90554	0.00030004	protein phosphorylation	0	1	cpnE
DDB_G0290621	GO:0006468	26.1799	1.90554	0.00030004	protein phosphorylation	0	1	DDB_G0290621
DDB_G0290687	GO:0006468	26.1799	1.90554	0.00030004	protein phosphorylation	0	1	mhkC
DDB_G0290859	GO:0006468	26.1799	1.90554	0.00030004	protein phosphorylation	0	1	DDB_G0290859
DDB_G0291079	GO:0006468	26.1799	1.90554	0.00030004	protein phosphorylation	1	1	gbpC
DDB_G0291133	GO:0006468	26.1799	1.90554	0.00030004	protein phosphorylation	0	1	DDB_G0291133
DDB_G0291231	GO:0006468	26.1799	1.90554	0.00030004	protein phosphorylation	0	1	mhkA
DDB_G0291267	GO:0006468	26.1799	1.90554	0.00030004	protein phosphorylation	1	1	dst3
DDB_G0291350	GO:0006468	26.1799	1.90554	0.00030004	protein phosphorylation	0	1	DDB_G0291350
DDB_G0291380	GO:0006468	26.1799	1.90554	0.00030004	protein phosphorylation	0	1	atr1
DDB_G0291516	GO:0006468	26.1799	1.90554	0.00030004	protein phosphorylation	0	1	DDB_G0291516
DDB_G0291664	GO:0006468	26.1799	1.90554	0.00030004	protein phosphorylation	0	1	DDB_G0291664
DDB_G0291710	GO:0006468	26.1799	1.90554	0.00030004	protein phosphorylation	1	1	roco10
DDB_G0291842	GO:0006468	26.1799	1.90554	0.00030004	protein phosphorylation	1	1	DDB_G0291842
DDB_G0291918	GO:0006468	26.1799	1.90554	0.00030004	protein phosphorylation	0	1	DDB_G0291918
DDB_G0292150	GO:0006468	26.1799	1.90554	0.00030004	protein phosphorylation	0	1	ak1
DDB_G0292152	GO:0006468	26.1799	1.90554	0.00030004	protein phosphorylation	0	1	cdc7
DDB_G0292304	GO:0006468	26.1799	1.90554	0.00030004	protein phosphorylation	0	1	mrkA
DDB_G0292350	GO:0006468	26.1799	1.90554	0.00030004	protein phosphorylation	0	1	DDB_G0292350
DDB_G0292390	GO:0006468	26.1799	1.90554	0.00030004	protein phosphorylation	1	1	atg1
DDB_G0292550	GO:0006468	26.1799	1.90554	0.00030004	protein phosphorylation	0	1	DDB_G0292550
DDB_G0292592	GO:0006468	26.1799	1.90554	0.00030004	protein phosphorylation	0	1	lst8
DDB_G0292624	GO:0006468	26.1799	1.90554	0.00030004	protein phosphorylation	0	1	DDB_G0292624
DDB_G0293124	GO:0006468	26.1799	1.90554	0.00030004	protein phosphorylation	0	1	kxcB
DDB_G0293184	GO:0006468	26.1799	1.90554	0.00030004	protein phosphorylation	0	1	DDB_G0293184
DDB_G0293276	GO:0006468	26.1799	1.90554	0.00030004	protein phosphorylation	1	1	DDB_G0293276
DDB_G0293292	GO:0006468	26.1799	1.90554	0.00030004	protein phosphorylation	0	1	DDB_G0293292
DDB_G0293656	GO:0006468	26.1799	1.90554	0.00030004	protein phosphorylation	0	1	fhkA
DDB_G0293746	GO:0006468	26.1799	1.90554	0.00030004	protein phosphorylation	0	1	DDB_G0293746
DDB_G0293750	GO:0006468	26.1799	1.90554	0.00030004	protein phosphorylation	0	1	dyrk2
DDB_G0293932	GO:0006468	26.1799	1.90554	0.00030004	protein phosphorylation	0	1	pakE
DDB_G0293958	GO:0006468	26.1799	1.90554	0.00030004	protein phosphorylation	0	1	DDB_G0293958
DDB_G0294515	GO:0006468	26.1799	1.90554	0.00030004	protein phosphorylation	1	1	dutA
DDB_G0294533	GO:0006468	26.1799	1.90554	0.00030004	protein phosphorylation	0	1	roco5
DDB_G0294633	GO:0006468	26.1799	1.90554	0.00030004	protein phosphorylation	0	1	DDB_G0294633
DDB_G0295785	GO:0006468	26.1799	1.90554	0.00030004	protein phosphorylation	1	1	DDB_G0295785
DDB_G0267616	GO:0008219	3.02476	4.59202	0.000445007	cell death	0	1	DDB_G0267616
DDB_G0267978	GO:0008219	3.02476	4.59202	0.000445007	cell death	0	1	krsB
DDB_G0269124	GO:0008219	3.02476	4.59202	0.000445007	cell death	1	1	dcsA
DDB_G0270850	GO:0008219	3.02476	4.59202	0.000445007	cell death	0	1	DDB_G0270850
DDB_G0272939	GO:0008219	3.02476	4.59202	0.000445007	cell death	0	1	DDB_G0272939
DDB_G0274257	GO:0008219	3.02476	4.59202	0.000445007	cell death	1	1	fhit
DDB_G0274593	GO:0008219	3.02476	4.59202	0.000445007	cell death	0	1	dst1
DDB_G0278971	GO:0008219	3.02476	4.59202	0.000445007	cell death	0	1	dimA
DDB_G0279411	GO:0008219	3.02476	4.59202	0.000445007	cell death	1	1	ctsD
DDB_G0282377	GO:0008219	3.02476	4.59202	0.000445007	cell death	1	1	dhkM
DDB_G0282819	GO:0008219	3.02476	4.59202	0.000445007	cell death	1	1	sglA
DDB_G0284157	GO:0008219	3.02476	4.59202	0.000445007	cell death	0	1	NA
DDB_G0285005	GO:0008219	3.02476	4.59202	0.000445007	cell death	0	1	aifB
DDB_G0285251	GO:0008219	3.02476	4.59202	0.000445007	cell death	0	1	rsc43
DDB_G0285411	GO:0008219	3.02476	4.59202	0.000445007	cell death	0	1	DDB_G0285411
DDB_G0287505	GO:0008219	3.02476	4.59202	0.000445007	cell death	0	1	talB
DDB_G0288071	GO:0008219	3.02476	4.59202	0.000445007	cell death	0	1	dst4
DDB_G0288755	GO:0008219	3.02476	4.59202	0.000445007	cell death	1	1	gbfA
DDB_G0289221	GO:0008219	3.02476	4.59202	0.000445007	cell death	0	1	DDB_G0289221
DDB_G0289407	GO:0008219	3.02476	4.59202	0.000445007	cell death	0	1	DDB_G0289407
DDB_G0289445	GO:0008219	3.02476	4.59202	0.000445007	cell death	1	1	prmt2
DDB_G0290577	GO:0008219	3.02476	4.59202	0.000445007	cell death	1	1	dnase2
DDB_G0290837	GO:0008219	3.02476	4.59202	0.000445007	cell death	0	1	DDB_G0290837
DDB_G0291033	GO:0008219	3.02476	4.59202	0.000445007	cell death	0	1	DDB_G0291033
DDB_G0291267	GO:0008219	3.02476	4.59202	0.000445007	cell death	1	1	dst3
DDB_G0292268	GO:0008219	3.02476	4.59202	0.000445007	cell death	0	1	rab2A
DDB_G0292390	GO:0008219	3.02476	4.59202	0.000445007	cell death	1	1	atg1
DDB_G0292564	GO:0008219	3.02476	4.59202	0.000445007	cell death	0	1	iplA
DDB_G0294046	GO:0008219	3.02476	4.59202	0.000445007	cell death	0	1	mrps4
DDB_G0267376	GO:0016310	34.7326	1.74281	0.000485724	phosphorylation	1	1	acrA
DDB_G0267450	GO:0016310	34.7326	1.74281	0.000485724	phosphorylation	0	1	pakC
DDB_G0267472	GO:0016310	34.7326	1.74281	0.000485724	phosphorylation	1	1	roco7
DDB_G0267514	GO:0016310	34.7326	1.74281	0.000485724	phosphorylation	0	1	DDB_G0267514
DDB_G0267540	GO:0016310	34.7326	1.74281	0.000485724	phosphorylation	1	1	scy1
DDB_G0267566	GO:0016310	34.7326	1.74281	0.000485724	phosphorylation	0	1	DDB_G0267566
DDB_G0267650	GO:0016310	34.7326	1.74281	0.000485724	phosphorylation	0	1	ireA
DDB_G0267686	GO:0016310	34.7326	1.74281	0.000485724	phosphorylation	0	1	DDB_G0267686
DDB_G0267760	GO:0016310	34.7326	1.74281	0.000485724	phosphorylation	0	1	tbck
DDB_G0267774	GO:0016310	34.7326	1.74281	0.000485724	phosphorylation	1	1	abkC
DDB_G0267934	GO:0016310	34.7326	1.74281	0.000485724	phosphorylation	1	1	fnkB
DDB_G0267962	GO:0016310	34.7326	1.74281	0.000485724	phosphorylation	0	1	tsuA
DDB_G0267978	GO:0016310	34.7326	1.74281	0.000485724	phosphorylation	0	1	krsB
DDB_G0268088	GO:0016310	34.7326	1.74281	0.000485724	phosphorylation	1	1	lvsG
DDB_G0268144	GO:0016310	34.7326	1.74281	0.000485724	phosphorylation	0	1	vwkA
DDB_G0268214	GO:0016310	34.7326	1.74281	0.000485724	phosphorylation	0	1	enoB
DDB_G0268550	GO:0016310	34.7326	1.74281	0.000485724	phosphorylation	0	1	DDB_G0268550
DDB_G0268636	GO:0016310	34.7326	1.74281	0.000485724	phosphorylation	0	1	roco11
DDB_G0268642	GO:0016310	34.7326	1.74281	0.000485724	phosphorylation	0	1	DDB_G0268642
DDB_G0268652	GO:0016310	34.7326	1.74281	0.000485724	phosphorylation	0	1	ippB
DDB_G0268656	GO:0016310	34.7326	1.74281	0.000485724	phosphorylation	1	1	DDB_G0268656
DDB_G0268748	GO:0016310	34.7326	1.74281	0.000485724	phosphorylation	0	1	DDB_G0268748
DDB_G0268812	GO:0016310	34.7326	1.74281	0.000485724	phosphorylation	0	1	DDB_G0268812
DDB_G0268876	GO:0016310	34.7326	1.74281	0.000485724	phosphorylation	1	1	DDB_G0268876
DDB_G0269034	GO:0016310	34.7326	1.74281	0.000485724	phosphorylation	1	1	udkA
DDB_G0269152	GO:0016310	34.7326	1.74281	0.000485724	phosphorylation	0	1	mekA
DDB_G0269166	GO:0016310	34.7326	1.74281	0.000485724	phosphorylation	0	1	pakA
DDB_G0269204	GO:0016310	34.7326	1.74281	0.000485724	phosphorylation	0	1	dhkE
DDB_G0269250	GO:0016310	34.7326	1.74281	0.000485724	phosphorylation	1	1	pats1
DDB_G0269274	GO:0016310	34.7326	1.74281	0.000485724	phosphorylation	1	1	dhak
DDB_G0269628	GO:0016310	34.7326	1.74281	0.000485724	phosphorylation	0	1	DDB_G0269628
DDB_G0269632	GO:0016310	34.7326	1.74281	0.000485724	phosphorylation	0	1	irlD
DDB_G0269678	GO:0016310	34.7326	1.74281	0.000485724	phosphorylation	0	1	fuk
DDB_G0269696	GO:0016310	34.7326	1.74281	0.000485724	phosphorylation	0	1	pakD
DDB_G0269876	GO:0016310	34.7326	1.74281	0.000485724	phosphorylation	0	1	samkA
DDB_G0270102	GO:0016310	34.7326	1.74281	0.000485724	phosphorylation	1	1	mkcF
DDB_G0270120	GO:0016310	34.7326	1.74281	0.000485724	phosphorylation	0	1	sdhB
DDB_G0270218	GO:0016310	34.7326	1.74281	0.000485724	phosphorylation	0	1	glkA
DDB_G0270444	GO:0016310	34.7326	1.74281	0.000485724	phosphorylation	0	1	DDB_G0270444
DDB_G0270544	GO:0016310	34.7326	1.74281	0.000485724	phosphorylation	0	1	gdt6
DDB_G0270550	GO:0016310	34.7326	1.74281	0.000485724	phosphorylation	0	1	gdt4
DDB_G0270658	GO:0016310	34.7326	1.74281	0.000485724	phosphorylation	0	1	acbA
DDB_G0270666	GO:0016310	34.7326	1.74281	0.000485724	phosphorylation	0	1	gdt2
DDB_G0270668	GO:0016310	34.7326	1.74281	0.000485724	phosphorylation	0	1	gdt8
DDB_G0270678	GO:0016310	34.7326	1.74281	0.000485724	phosphorylation	0	1	samkC
DDB_G0270814	GO:0016310	34.7326	1.74281	0.000485724	phosphorylation	0	1	nek2
DDB_G0270894	GO:0016310	34.7326	1.74281	0.000485724	phosphorylation	0	1	irlC
DDB_G0271022	GO:0016310	34.7326	1.74281	0.000485724	phosphorylation	0	1	adcC
DDB_G0271146	GO:0016310	34.7326	1.74281	0.000485724	phosphorylation	0	1	udkD
DDB_G0271538	GO:0016310	34.7326	1.74281	0.000485724	phosphorylation	0	1	DDB_G0271538
DDB_G0271550	GO:0016310	34.7326	1.74281	0.000485724	phosphorylation	1	1	DDB_G0271550
DDB_G0271564	GO:0016310	34.7326	1.74281	0.000485724	phosphorylation	0	1	pdhX
DDB_G0271682	GO:0016310	34.7326	1.74281	0.000485724	phosphorylation	0	1	DDB_G0271682
DDB_G0271760	GO:0016310	34.7326	1.74281	0.000485724	phosphorylation	0	1	ipkA1
DDB_G0271774	GO:0016310	34.7326	1.74281	0.000485724	phosphorylation	0	1	uqcrh
DDB_G0272092	GO:0016310	34.7326	1.74281	0.000485724	phosphorylation	0	1	DDB_G0272092
DDB_G0272106	GO:0016310	34.7326	1.74281	0.000485724	phosphorylation	0	1	arpB
DDB_G0272246	GO:0016310	34.7326	1.74281	0.000485724	phosphorylation	0	1	prsB
DDB_G0272254	GO:0016310	34.7326	1.74281	0.000485724	phosphorylation	0	1	DDB_G0272254
DDB_G0272282	GO:0016310	34.7326	1.74281	0.000485724	phosphorylation	1	1	DDB_G0272282
DDB_G0272350	GO:0016310	34.7326	1.74281	0.000485724	phosphorylation	1	1	sgkC
DDB_G0272522	GO:0016310	34.7326	1.74281	0.000485724	phosphorylation	0	1	sgkA
DDB_G0272837	GO:0016310	34.7326	1.74281	0.000485724	phosphorylation	0	1	ifkA
DDB_G0272987	GO:0016310	34.7326	1.74281	0.000485724	phosphorylation	1	1	irlA
DDB_G0274101	GO:0016310	34.7326	1.74281	0.000485724	phosphorylation	1	1	dokA
DDB_G0274139	GO:0016310	34.7326	1.74281	0.000485724	phosphorylation	0	1	cycC
DDB_G0274191	GO:0016310	34.7326	1.74281	0.000485724	phosphorylation	0	1	dhkC
DDB_G0274375	GO:0016310	34.7326	1.74281	0.000485724	phosphorylation	0	1	fba
DDB_G0274395	GO:0016310	34.7326	1.74281	0.000485724	phosphorylation	0	1	adcB
DDB_G0274409	GO:0016310	34.7326	1.74281	0.000485724	phosphorylation	0	1	pakF
DDB_G0274437	GO:0016310	34.7326	1.74281	0.000485724	phosphorylation	0	1	twfA
DDB_G0274471	GO:0016310	34.7326	1.74281	0.000485724	phosphorylation	0	1	tpiA
DDB_G0274503	GO:0016310	34.7326	1.74281	0.000485724	phosphorylation	0	1	plk
DDB_G0274559	GO:0016310	34.7326	1.74281	0.000485724	phosphorylation	0	1	udkB
DDB_G0274569	GO:0016310	34.7326	1.74281	0.000485724	phosphorylation	0	1	acgA
DDB_G0274593	GO:0016310	34.7326	1.74281	0.000485724	phosphorylation	0	1	dst1
DDB_G0274597	GO:0016310	34.7326	1.74281	0.000485724	phosphorylation	0	1	ctnA
DDB_G0274613	GO:0016310	34.7326	1.74281	0.000485724	phosphorylation	0	1	DDB_G0274613
DDB_G0274811	GO:0016310	34.7326	1.74281	0.000485724	phosphorylation	1	1	argB
DDB_G0274821	GO:0016310	34.7326	1.74281	0.000485724	phosphorylation	0	1	DDB_G0274821
DDB_G0275011	GO:0016310	34.7326	1.74281	0.000485724	phosphorylation	0	1	pikC
DDB_G0275057	GO:0016310	34.7326	1.74281	0.000485724	phosphorylation	0	1	DDB_G0275057
DDB_G0275165	GO:0016310	34.7326	1.74281	0.000485724	phosphorylation	0	1	DDB_G0275165
DDB_G0275241	GO:0016310	34.7326	1.74281	0.000485724	phosphorylation	0	1	nek3
DDB_G0275265	GO:0016310	34.7326	1.74281	0.000485724	phosphorylation	0	1	etnkB
DDB_G0275537	GO:0016310	34.7326	1.74281	0.000485724	phosphorylation	0	1	cytC
DDB_G0275561	GO:0016310	34.7326	1.74281	0.000485724	phosphorylation	0	1	fnkA
DDB_G0275627	GO:0016310	34.7326	1.74281	0.000485724	phosphorylation	0	1	sky1
DDB_G0275635	GO:0016310	34.7326	1.74281	0.000485724	phosphorylation	0	1	pik6
DDB_G0275663	GO:0016310	34.7326	1.74281	0.000485724	phosphorylation	0	1	ippA
DDB_G0275845	GO:0016310	34.7326	1.74281	0.000485724	phosphorylation	0	1	smg1
DDB_G0275879	GO:0016310	34.7326	1.74281	0.000485724	phosphorylation	1	1	fnkE
DDB_G0276025	GO:0016310	34.7326	1.74281	0.000485724	phosphorylation	0	1	zakA
DDB_G0276043	GO:0016310	34.7326	1.74281	0.000485724	phosphorylation	0	1	ifkC
DDB_G0276143	GO:0016310	34.7326	1.74281	0.000485724	phosphorylation	0	1	dhkF
DDB_G0276157	GO:0016310	34.7326	1.74281	0.000485724	phosphorylation	0	1	pkgA
DDB_G0276181	GO:0016310	34.7326	1.74281	0.000485724	phosphorylation	0	1	DDB_G0276181
DDB_G0276253	GO:0016310	34.7326	1.74281	0.000485724	phosphorylation	0	1	DDB_G0276253
DDB_G0276349	GO:0016310	34.7326	1.74281	0.000485724	phosphorylation	0	1	fnkC
DDB_G0276435	GO:0016310	34.7326	1.74281	0.000485724	phosphorylation	1	1	NA
DDB_G0276465	GO:0016310	34.7326	1.74281	0.000485724	phosphorylation	0	1	sepA
DDB_G0276527	GO:0016310	34.7326	1.74281	0.000485724	phosphorylation	0	1	DDB_G0276527
DDB_G0276577	GO:0016310	34.7326	1.74281	0.000485724	phosphorylation	0	1	fray2
DDB_G0276885	GO:0016310	34.7326	1.74281	0.000485724	phosphorylation	0	1	casK
DDB_G0277071	GO:0016310	34.7326	1.74281	0.000485724	phosphorylation	0	1	dupA
DDB_G0277145	GO:0016310	34.7326	1.74281	0.000485724	phosphorylation	1	1	pkaD
DDB_G0277165	GO:0016310	34.7326	1.74281	0.000485724	phosphorylation	0	1	DDB_G0277165
DDB_G0277223	GO:0016310	34.7326	1.74281	0.000485724	phosphorylation	0	1	dgkA
DDB_G0277231	GO:0016310	34.7326	1.74281	0.000485724	phosphorylation	0	1	ndufs8
DDB_G0277399	GO:0016310	34.7326	1.74281	0.000485724	phosphorylation	0	1	piaA
DDB_G0277449	GO:0016310	34.7326	1.74281	0.000485724	phosphorylation	1	1	DDB_G0277449
DDB_G0277537	GO:0016310	34.7326	1.74281	0.000485724	phosphorylation	0	1	DDB_G0277537
DDB_G0277539	GO:0016310	34.7326	1.74281	0.000485724	phosphorylation	1	1	DDB_G0277539
DDB_G0277667	GO:0016310	34.7326	1.74281	0.000485724	phosphorylation	0	1	DDB_G0277667
DDB_G0277845	GO:0016310	34.7326	1.74281	0.000485724	phosphorylation	1	1	dhkB
DDB_G0277883	GO:0016310	34.7326	1.74281	0.000485724	phosphorylation	0	1	dhkJ
DDB_G0277887	GO:0016310	34.7326	1.74281	0.000485724	phosphorylation	0	1	dhkK
DDB_G0277905	GO:0016310	34.7326	1.74281	0.000485724	phosphorylation	0	1	snfA
DDB_G0277945	GO:0016310	34.7326	1.74281	0.000485724	phosphorylation	0	1	nol9
DDB_G0277989	GO:0016310	34.7326	1.74281	0.000485724	phosphorylation	0	1	DDB_G0277989
DDB_G0278283	GO:0016310	34.7326	1.74281	0.000485724	phosphorylation	0	1	fol1
DDB_G0278457	GO:0016310	34.7326	1.74281	0.000485724	phosphorylation	0	1	ndrA
DDB_G0278487	GO:0016310	34.7326	1.74281	0.000485724	phosphorylation	0	1	DDB_G0278487
DDB_G0278509	GO:0016310	34.7326	1.74281	0.000485724	phosphorylation	0	1	DDB_G0278509
DDB_G0278521	GO:0016310	34.7326	1.74281	0.000485724	phosphorylation	0	1	DDB_G0278521
DDB_G0278535	GO:0016310	34.7326	1.74281	0.000485724	phosphorylation	0	1	DDB_G0278535
DDB_G0278551	GO:0016310	34.7326	1.74281	0.000485724	phosphorylation	1	1	DDB_G0278551
DDB_G0278665	GO:0016310	34.7326	1.74281	0.000485724	phosphorylation	0	1	DDB_G0278665
DDB_G0278723	GO:0016310	34.7326	1.74281	0.000485724	phosphorylation	0	1	gdt1
DDB_G0278727	GO:0016310	34.7326	1.74281	0.000485724	phosphorylation	0	1	pikA
DDB_G0278737	GO:0016310	34.7326	1.74281	0.000485724	phosphorylation	0	1	rckA
DDB_G0278739	GO:0016310	34.7326	1.74281	0.000485724	phosphorylation	1	1	I6KA
DDB_G0278783	GO:0016310	34.7326	1.74281	0.000485724	phosphorylation	0	1	elp4
DDB_G0278845	GO:0016310	34.7326	1.74281	0.000485724	phosphorylation	0	1	DDB_G0278845
DDB_G0278863	GO:0016310	34.7326	1.74281	0.000485724	phosphorylation	1	1	fray1
DDB_G0278879	GO:0016310	34.7326	1.74281	0.000485724	phosphorylation	1	1	gdt9
DDB_G0278901	GO:0016310	34.7326	1.74281	0.000485724	phosphorylation	1	1	DDB_G0278901
DDB_G0278909	GO:0016310	34.7326	1.74281	0.000485724	phosphorylation	0	1	DDB_G0278909
DDB_G0278921	GO:0016310	34.7326	1.74281	0.000485724	phosphorylation	0	1	DDB_G0278921
DDB_G0279001	GO:0016310	34.7326	1.74281	0.000485724	phosphorylation	0	1	gmkA
DDB_G0279149	GO:0016310	34.7326	1.74281	0.000485724	phosphorylation	0	1	pip5k3
DDB_G0279343	GO:0016310	34.7326	1.74281	0.000485724	phosphorylation	0	1	aurK
DDB_G0279417	GO:0016310	34.7326	1.74281	0.000485724	phosphorylation	0	1	roco6
DDB_G0279609	GO:0016310	34.7326	1.74281	0.000485724	phosphorylation	0	1	DDB_G0279609
DDB_G0279629	GO:0016310	34.7326	1.74281	0.000485724	phosphorylation	0	1	lkb1
DDB_G0279719	GO:0016310	34.7326	1.74281	0.000485724	phosphorylation	0	1	DDB_G0279719
DDB_G0279761	GO:0016310	34.7326	1.74281	0.000485724	phosphorylation	0	1	DDB_G0279761
DDB_G0279831	GO:0016310	34.7326	1.74281	0.000485724	phosphorylation	0	1	DDB_G0279831
DDB_G0279913	GO:0016310	34.7326	1.74281	0.000485724	phosphorylation	0	1	dhkH
DDB_G0279925	GO:0016310	34.7326	1.74281	0.000485724	phosphorylation	0	1	mlkA
DDB_G0280111	GO:0016310	34.7326	1.74281	0.000485724	phosphorylation	0	1	DDB_G0280111
DDB_G0280131	GO:0016310	34.7326	1.74281	0.000485724	phosphorylation	0	1	DDB_G0280131
DDB_G0280133	GO:0016310	34.7326	1.74281	0.000485724	phosphorylation	0	1	DDB_G0280133
DDB_G0280193	GO:0016310	34.7326	1.74281	0.000485724	phosphorylation	0	1	DDB_G0280193
DDB_G0280321	GO:0016310	34.7326	1.74281	0.000485724	phosphorylation	0	1	fhkE
DDB_G0280353	GO:0016310	34.7326	1.74281	0.000485724	phosphorylation	0	1	odhA
DDB_G0280371	GO:0016310	34.7326	1.74281	0.000485724	phosphorylation	0	1	DDB_G0280371
DDB_G0280425	GO:0016310	34.7326	1.74281	0.000485724	phosphorylation	0	1	DDB_G0280425
DDB_G0280431	GO:0016310	34.7326	1.74281	0.000485724	phosphorylation	0	1	rio1
DDB_G0280461	GO:0016310	34.7326	1.74281	0.000485724	phosphorylation	1	1	DDB_G0280461
DDB_G0280469	GO:0016310	34.7326	1.74281	0.000485724	phosphorylation	0	1	psrA
DDB_G0280557	GO:0016310	34.7326	1.74281	0.000485724	phosphorylation	0	1	DDB_G0280557
DDB_G0280599	GO:0016310	34.7326	1.74281	0.000485724	phosphorylation	1	1	fhkB
DDB_G0280643	GO:0016310	34.7326	1.74281	0.000485724	phosphorylation	0	1	DDB_G0280643
DDB_G0280717	GO:0016310	34.7326	1.74281	0.000485724	phosphorylation	0	1	DDB_G0280717
DDB_G0280813	GO:0016310	34.7326	1.74281	0.000485724	phosphorylation	0	1	DDB_G0280813
DDB_G0280855	GO:0016310	34.7326	1.74281	0.000485724	phosphorylation	0	1	DDB_G0280855
DDB_G0280893	GO:0016310	34.7326	1.74281	0.000485724	phosphorylation	0	1	rbsk
DDB_G0280961	GO:0016310	34.7326	1.74281	0.000485724	phosphorylation	0	1	dhkA
DDB_G0280995	GO:0016310	34.7326	1.74281	0.000485724	phosphorylation	0	1	mps1
DDB_G0281167	GO:0016310	34.7326	1.74281	0.000485724	phosphorylation	1	1	dnapkcs
DDB_G0281179	GO:0016310	34.7326	1.74281	0.000485724	phosphorylation	0	1	clkA
DDB_G0281229	GO:0016310	34.7326	1.74281	0.000485724	phosphorylation	0	1	pnkp
DDB_G0281239	GO:0016310	34.7326	1.74281	0.000485724	phosphorylation	0	1	impa1
DDB_G0281331	GO:0016310	34.7326	1.74281	0.000485724	phosphorylation	1	1	DDB_G0281331
DDB_G0281343	GO:0016310	34.7326	1.74281	0.000485724	phosphorylation	0	1	shkD
DDB_G0281385	GO:0016310	34.7326	1.74281	0.000485724	phosphorylation	0	1	rasC
DDB_G0281387	GO:0016310	34.7326	1.74281	0.000485724	phosphorylation	0	1	srfA
DDB_G0281471	GO:0016310	34.7326	1.74281	0.000485724	phosphorylation	0	1	pdkA
DDB_G0281523	GO:0016310	34.7326	1.74281	0.000485724	phosphorylation	0	1	DDB_G0281523
DDB_G0281557	GO:0016310	34.7326	1.74281	0.000485724	phosphorylation	0	1	drkD
DDB_G0281567	GO:0016310	34.7326	1.74281	0.000485724	phosphorylation	0	1	fhkC
DDB_G0281569	GO:0016310	34.7326	1.74281	0.000485724	phosphorylation	0	1	tor
DDB_G0281799	GO:0016310	34.7326	1.74281	0.000485724	phosphorylation	0	1	abkB
DDB_G0281863	GO:0016310	34.7326	1.74281	0.000485724	phosphorylation	0	1	slob1
DDB_G0281895	GO:0016310	34.7326	1.74281	0.000485724	phosphorylation	0	1	mrkC
DDB_G0281899	GO:0016310	34.7326	1.74281	0.000485724	phosphorylation	0	1	drkC
DDB_G0281947	GO:0016310	34.7326	1.74281	0.000485724	phosphorylation	0	1	tra1
DDB_G0282145	GO:0016310	34.7326	1.74281	0.000485724	phosphorylation	0	1	ptpC
DDB_G0282367	GO:0016310	34.7326	1.74281	0.000485724	phosphorylation	0	1	selD
DDB_G0282377	GO:0016310	34.7326	1.74281	0.000485724	phosphorylation	1	1	dhkM
DDB_G0282417	GO:0016310	34.7326	1.74281	0.000485724	phosphorylation	0	1	DDB_G0282417
DDB_G0282489	GO:0016310	34.7326	1.74281	0.000485724	phosphorylation	1	1	mhkD
DDB_G0282625	GO:0016310	34.7326	1.74281	0.000485724	phosphorylation	0	1	pikG
DDB_G0282627	GO:0016310	34.7326	1.74281	0.000485724	phosphorylation	0	1	vps15
DDB_G0282759	GO:0016310	34.7326	1.74281	0.000485724	phosphorylation	0	1	DDB_G0282759
DDB_G0282777	GO:0016310	34.7326	1.74281	0.000485724	phosphorylation	0	1	DDB_G0282777
DDB_G0282891	GO:0016310	34.7326	1.74281	0.000485724	phosphorylation	0	1	pakG
DDB_G0282895	GO:0016310	34.7326	1.74281	0.000485724	phosphorylation	0	1	DDB_G0282895
DDB_G0282927	GO:0016310	34.7326	1.74281	0.000485724	phosphorylation	0	1	dhkL
DDB_G0282963	GO:0016310	34.7326	1.74281	0.000485724	phosphorylation	0	1	DDB_G0282963
DDB_G0283065	GO:0016310	34.7326	1.74281	0.000485724	phosphorylation	1	1	DDB_G0283065
DDB_G0283081	GO:0016310	34.7326	1.74281	0.000485724	phosphorylation	0	1	pikB
DDB_G0283109	GO:0016310	34.7326	1.74281	0.000485724	phosphorylation	0	1	iksA
DDB_G0283137	GO:0016310	34.7326	1.74281	0.000485724	phosphorylation	0	1	enoA
DDB_G0283247	GO:0016310	34.7326	1.74281	0.000485724	phosphorylation	0	1	pyk
DDB_G0283265	GO:0016310	34.7326	1.74281	0.000485724	phosphorylation	0	1	mkkA
DDB_G0283267	GO:0016310	34.7326	1.74281	0.000485724	phosphorylation	0	1	shkA
DDB_G0283337	GO:0016310	34.7326	1.74281	0.000485724	phosphorylation	0	1	DDB_G0283337
DDB_G0283385	GO:0016310	34.7326	1.74281	0.000485724	phosphorylation	0	1	splA
DDB_G0283391	GO:0016310	34.7326	1.74281	0.000485724	phosphorylation	0	1	kinX
DDB_G0283397	GO:0016310	34.7326	1.74281	0.000485724	phosphorylation	0	1	DDB_G0283397
DDB_G0283605	GO:0016310	34.7326	1.74281	0.000485724	phosphorylation	0	1	yakA
DDB_G0283615	GO:0016310	34.7326	1.74281	0.000485724	phosphorylation	1	1	rpkA
DDB_G0283627	GO:0016310	34.7326	1.74281	0.000485724	phosphorylation	1	1	prsC
DDB_G0283699	GO:0016310	34.7326	1.74281	0.000485724	phosphorylation	0	1	phg2
DDB_G0283805	GO:0016310	34.7326	1.74281	0.000485724	phosphorylation	0	1	adkA
DDB_G0283821	GO:0016310	34.7326	1.74281	0.000485724	phosphorylation	0	1	DDB_G0283821
DDB_G0283907	GO:0016310	34.7326	1.74281	0.000485724	phosphorylation	0	1	pkaC
DDB_G0284029	GO:0016310	34.7326	1.74281	0.000485724	phosphorylation	0	1	pkgD
DDB_G0284045	GO:0016310	34.7326	1.74281	0.000485724	phosphorylation	0	1	dhkG
DDB_G0284181	GO:0016310	34.7326	1.74281	0.000485724	phosphorylation	0	1	krsA
DDB_G0284489	GO:0016310	34.7326	1.74281	0.000485724	phosphorylation	1	1	pdkB
DDB_G0284491	GO:0016310	34.7326	1.74281	0.000485724	phosphorylation	0	1	DDB_G0284491
DDB_G0284545	GO:0016310	34.7326	1.74281	0.000485724	phosphorylation	0	1	sgkB
DDB_G0284557	GO:0016310	34.7326	1.74281	0.000485724	phosphorylation	0	1	DDB_G0284557
DDB_G0284611	GO:0016310	34.7326	1.74281	0.000485724	phosphorylation	0	1	ripA
DDB_G0284839	GO:0016310	34.7326	1.74281	0.000485724	phosphorylation	1	1	ndrC
DDB_G0284859	GO:0016310	34.7326	1.74281	0.000485724	phosphorylation	1	1	samkB
DDB_G0284897	GO:0016310	34.7326	1.74281	0.000485724	phosphorylation	1	1	abkD
DDB_G0285311	GO:0016310	34.7326	1.74281	0.000485724	phosphorylation	0	1	gpmA
DDB_G0285427	GO:0016310	34.7326	1.74281	0.000485724	phosphorylation	0	1	mkcA
DDB_G0285463	GO:0016310	34.7326	1.74281	0.000485724	phosphorylation	0	1	DDB_G0285463
DDB_G0285525	GO:0016310	34.7326	1.74281	0.000485724	phosphorylation	0	1	DDB_G0285525
DDB_G0285643	GO:0016310	34.7326	1.74281	0.000485724	phosphorylation	0	1	mrkB
DDB_G0285963	GO:0016310	34.7326	1.74281	0.000485724	phosphorylation	0	1	fhkD
DDB_G0286125	GO:0016310	34.7326	1.74281	0.000485724	phosphorylation	0	1	pkgC
DDB_G0286127	GO:0016310	34.7326	1.74281	0.000485724	phosphorylation	0	1	roco8
DDB_G0286257	GO:0016310	34.7326	1.74281	0.000485724	phosphorylation	0	1	argC
DDB_G0286347	GO:0016310	34.7326	1.74281	0.000485724	phosphorylation	0	1	DDB_G0286347
DDB_G0286353	GO:0016310	34.7326	1.74281	0.000485724	phosphorylation	0	1	erkA
DDB_G0286359	GO:0016310	34.7326	1.74281	0.000485724	phosphorylation	0	1	svkA
DDB_G0286465	GO:0016310	34.7326	1.74281	0.000485724	phosphorylation	0	1	DDB_G0286465
DDB_G0286479	GO:0016310	34.7326	1.74281	0.000485724	phosphorylation	0	1	DDB_G0286479
DDB_G0286481	GO:0016310	34.7326	1.74281	0.000485724	phosphorylation	0	1	DDB_G0286481
DDB_G0286485	GO:0016310	34.7326	1.74281	0.000485724	phosphorylation	0	1	DDB_G0286485
DDB_G0286557	GO:0016310	34.7326	1.74281	0.000485724	phosphorylation	0	1	pten
DDB_G0286617	GO:0016310	34.7326	1.74281	0.000485724	phosphorylation	0	1	cycK
DDB_G0286627	GO:0016310	34.7326	1.74281	0.000485724	phosphorylation	0	1	DDB_G0286627
DDB_G0286841	GO:0016310	34.7326	1.74281	0.000485724	phosphorylation	0	1	DDB_G0286841
DDB_G0287001	GO:0016310	34.7326	1.74281	0.000485724	phosphorylation	0	1	DDB_G0287001
DDB_G0287495	GO:0016310	34.7326	1.74281	0.000485724	phosphorylation	0	1	pyrK
DDB_G0287631	GO:0016310	34.7326	1.74281	0.000485724	phosphorylation	0	1	glk
DDB_G0287745	GO:0016310	34.7326	1.74281	0.000485724	phosphorylation	0	1	DDB_G0287745
DDB_G0287839	GO:0016310	34.7326	1.74281	0.000485724	phosphorylation	0	1	DDB_G0287839
DDB_G0287853	GO:0016310	34.7326	1.74281	0.000485724	phosphorylation	0	1	mkcC
DDB_G0287929	GO:0016310	34.7326	1.74281	0.000485724	phosphorylation	0	1	NA
DDB_G0287957	GO:0016310	34.7326	1.74281	0.000485724	phosphorylation	0	1	DDB_G0287957
DDB_G0288071	GO:0016310	34.7326	1.74281	0.000485724	phosphorylation	0	1	dst4
DDB_G0288127	GO:0016310	34.7326	1.74281	0.000485724	phosphorylation	0	1	ogdh
DDB_G0288147	GO:0016310	34.7326	1.74281	0.000485724	phosphorylation	0	1	pkcA
DDB_G0288183	GO:0016310	34.7326	1.74281	0.000485724	phosphorylation	0	1	roco9
DDB_G0288251	GO:0016310	34.7326	1.74281	0.000485724	phosphorylation	0	1	roco4
DDB_G0288351	GO:0016310	34.7326	1.74281	0.000485724	phosphorylation	0	1	DDB_G0288351
DDB_G0288485	GO:0016310	34.7326	1.74281	0.000485724	phosphorylation	0	1	pikD
DDB_G0288617	GO:0016310	34.7326	1.74281	0.000485724	phosphorylation	0	1	shkB
DDB_G0288795	GO:0016310	34.7326	1.74281	0.000485724	phosphorylation	0	1	DDB_G0288795
DDB_G0288803	GO:0016310	34.7326	1.74281	0.000485724	phosphorylation	1	1	irlE
DDB_G0289001	GO:0016310	34.7326	1.74281	0.000485724	phosphorylation	0	1	pyk3
DDB_G0289115	GO:0016310	34.7326	1.74281	0.000485724	phosphorylation	1	1	mhkB
DDB_G0289119	GO:0016310	34.7326	1.74281	0.000485724	phosphorylation	0	1	pXi
DDB_G0289179	GO:0016310	34.7326	1.74281	0.000485724	phosphorylation	0	1	thyB
DDB_G0289233	GO:0016310	34.7326	1.74281	0.000485724	phosphorylation	0	1	DDB_G0289233
DDB_G0289343	GO:0016310	34.7326	1.74281	0.000485724	phosphorylation	0	1	sgkD
DDB_G0289543	GO:0016310	34.7326	1.74281	0.000485724	phosphorylation	0	1	ndrD
DDB_G0289555	GO:0016310	34.7326	1.74281	0.000485724	phosphorylation	0	1	arkA
DDB_G0289591	GO:0016310	34.7326	1.74281	0.000485724	phosphorylation	1	1	NA
DDB_G0289601	GO:0016310	34.7326	1.74281	0.000485724	phosphorylation	0	1	pikE
DDB_G0289615	GO:0016310	34.7326	1.74281	0.000485724	phosphorylation	0	1	NA
DDB_G0289661	GO:0016310	34.7326	1.74281	0.000485724	phosphorylation	0	1	kinY
DDB_G0289709	GO:0016310	34.7326	1.74281	0.000485724	phosphorylation	0	1	drkB
DDB_G0289791	GO:0016310	34.7326	1.74281	0.000485724	phosphorylation	0	1	drkA
DDB_G0289859	GO:0016310	34.7326	1.74281	0.000485724	phosphorylation	0	1	kxcA
DDB_G0290033	GO:0016310	34.7326	1.74281	0.000485724	phosphorylation	0	1	dtymk
DDB_G0290451	GO:0016310	34.7326	1.74281	0.000485724	phosphorylation	0	1	shkE
DDB_G0290529	GO:0016310	34.7326	1.74281	0.000485724	phosphorylation	0	1	cpnE
DDB_G0290621	GO:0016310	34.7326	1.74281	0.000485724	phosphorylation	0	1	DDB_G0290621
DDB_G0290687	GO:0016310	34.7326	1.74281	0.000485724	phosphorylation	0	1	mhkC
DDB_G0290859	GO:0016310	34.7326	1.74281	0.000485724	phosphorylation	0	1	DDB_G0290859
DDB_G0291029	GO:0016310	34.7326	1.74281	0.000485724	phosphorylation	0	1	DDB_G0291029
DDB_G0291079	GO:0016310	34.7326	1.74281	0.000485724	phosphorylation	1	1	gbpC
DDB_G0291133	GO:0016310	34.7326	1.74281	0.000485724	phosphorylation	0	1	DDB_G0291133
DDB_G0291231	GO:0016310	34.7326	1.74281	0.000485724	phosphorylation	0	1	mhkA
DDB_G0291267	GO:0016310	34.7326	1.74281	0.000485724	phosphorylation	1	1	dst3
DDB_G0291350	GO:0016310	34.7326	1.74281	0.000485724	phosphorylation	0	1	DDB_G0291350
DDB_G0291380	GO:0016310	34.7326	1.74281	0.000485724	phosphorylation	0	1	atr1
DDB_G0291516	GO:0016310	34.7326	1.74281	0.000485724	phosphorylation	0	1	DDB_G0291516
DDB_G0291664	GO:0016310	34.7326	1.74281	0.000485724	phosphorylation	0	1	DDB_G0291664
DDB_G0291710	GO:0016310	34.7326	1.74281	0.000485724	phosphorylation	1	1	roco10
DDB_G0291842	GO:0016310	34.7326	1.74281	0.000485724	phosphorylation	1	1	DDB_G0291842
DDB_G0291918	GO:0016310	34.7326	1.74281	0.000485724	phosphorylation	0	1	DDB_G0291918
DDB_G0292112	GO:0016310	34.7326	1.74281	0.000485724	phosphorylation	0	1	galK
DDB_G0292150	GO:0016310	34.7326	1.74281	0.000485724	phosphorylation	0	1	ak1
DDB_G0292152	GO:0016310	34.7326	1.74281	0.000485724	phosphorylation	0	1	cdc7
DDB_G0292190	GO:0016310	34.7326	1.74281	0.000485724	phosphorylation	0	1	DDB_G0292190
DDB_G0292304	GO:0016310	34.7326	1.74281	0.000485724	phosphorylation	0	1	mrkA
DDB_G0292350	GO:0016310	34.7326	1.74281	0.000485724	phosphorylation	0	1	DDB_G0292350
DDB_G0292390	GO:0016310	34.7326	1.74281	0.000485724	phosphorylation	1	1	atg1
DDB_G0292440	GO:0016310	34.7326	1.74281	0.000485724	phosphorylation	0	1	DDB_G0292440
DDB_G0292442	GO:0016310	34.7326	1.74281	0.000485724	phosphorylation	1	1	DDB_G0292442
DDB_G0292550	GO:0016310	34.7326	1.74281	0.000485724	phosphorylation	0	1	DDB_G0292550
DDB_G0292592	GO:0016310	34.7326	1.74281	0.000485724	phosphorylation	0	1	lst8
DDB_G0292624	GO:0016310	34.7326	1.74281	0.000485724	phosphorylation	0	1	DDB_G0292624
DDB_G0292730	GO:0016310	34.7326	1.74281	0.000485724	phosphorylation	0	1	adkB
DDB_G0293124	GO:0016310	34.7326	1.74281	0.000485724	phosphorylation	0	1	kxcB
DDB_G0293184	GO:0016310	34.7326	1.74281	0.000485724	phosphorylation	0	1	DDB_G0293184
DDB_G0293276	GO:0016310	34.7326	1.74281	0.000485724	phosphorylation	1	1	DDB_G0293276
DDB_G0293292	GO:0016310	34.7326	1.74281	0.000485724	phosphorylation	0	1	DDB_G0293292
DDB_G0293524	GO:0016310	34.7326	1.74281	0.000485724	phosphorylation	0	1	ppk1
DDB_G0293656	GO:0016310	34.7326	1.74281	0.000485724	phosphorylation	0	1	fhkA
DDB_G0293746	GO:0016310	34.7326	1.74281	0.000485724	phosphorylation	0	1	DDB_G0293746
DDB_G0293750	GO:0016310	34.7326	1.74281	0.000485724	phosphorylation	0	1	dyrk2
DDB_G0293932	GO:0016310	34.7326	1.74281	0.000485724	phosphorylation	0	1	pakE
DDB_G0293946	GO:0016310	34.7326	1.74281	0.000485724	phosphorylation	0	1	DDB_G0293946
DDB_G0293958	GO:0016310	34.7326	1.74281	0.000485724	phosphorylation	0	1	DDB_G0293958
DDB_G0293982	GO:0016310	34.7326	1.74281	0.000485724	phosphorylation	0	1	NA
DDB_G0294048	GO:0016310	34.7326	1.74281	0.000485724	phosphorylation	0	1	nad4
DDB_G0294052	GO:0016310	34.7326	1.74281	0.000485724	phosphorylation	0	1	nad11
DDB_G0294088	GO:0016310	34.7326	1.74281	0.000485724	phosphorylation	0	1	cox1/2
DDB_G0294515	GO:0016310	34.7326	1.74281	0.000485724	phosphorylation	1	1	dutA
DDB_G0294533	GO:0016310	34.7326	1.74281	0.000485724	phosphorylation	0	1	roco5
DDB_G0294633	GO:0016310	34.7326	1.74281	0.000485724	phosphorylation	0	1	DDB_G0294633
DDB_G0295785	GO:0016310	34.7326	1.74281	0.000485724	phosphorylation	1	1	DDB_G0295785
DDB_G0267376	GO:0048856	38.9047	1.65798	0.000894304	anatomical structure development	1	1	acrA
DDB_G0267384	GO:0048856	38.9047	1.65798	0.000894304	anatomical structure development	0	1	culB
DDB_G0267400	GO:0048856	38.9047	1.65798	0.000894304	anatomical structure development	0	1	hspD
DDB_G0267410	GO:0048856	38.9047	1.65798	0.000894304	anatomical structure development	0	1	pslA
DDB_G0267422	GO:0048856	38.9047	1.65798	0.000894304	anatomical structure development	0	1	tipC
DDB_G0267424	GO:0048856	38.9047	1.65798	0.000894304	anatomical structure development	1	1	amtC
DDB_G0267426	GO:0048856	38.9047	1.65798	0.000894304	anatomical structure development	1	1	cshA
DDB_G0267432	GO:0048856	38.9047	1.65798	0.000894304	anatomical structure development	0	1	abcG15
DDB_G0267436	GO:0048856	38.9047	1.65798	0.000894304	anatomical structure development	0	1	abcF4
DDB_G0267444	GO:0048856	38.9047	1.65798	0.000894304	anatomical structure development	0	1	phg1A
DDB_G0267452	GO:0048856	38.9047	1.65798	0.000894304	anatomical structure development	1	1	sonA
DDB_G0267460	GO:0048856	38.9047	1.65798	0.000894304	anatomical structure development	0	1	cybA
DDB_G0267462	GO:0048856	38.9047	1.65798	0.000894304	anatomical structure development	0	1	Dd5P4
DDB_G0267470	GO:0048856	38.9047	1.65798	0.000894304	anatomical structure development	0	1	dicB
DDB_G0267474	GO:0048856	38.9047	1.65798	0.000894304	anatomical structure development	0	1	sigD
DDB_G0267476	GO:0048856	38.9047	1.65798	0.000894304	anatomical structure development	0	1	sigK
DDB_G0267830	GO:0048856	38.9047	1.65798	0.000894304	anatomical structure development	0	1	gemA
DDB_G0267962	GO:0048856	38.9047	1.65798	0.000894304	anatomical structure development	0	1	tsuA
DDB_G0268144	GO:0048856	38.9047	1.65798	0.000894304	anatomical structure development	0	1	vwkA
DDB_G0268168	GO:0048856	38.9047	1.65798	0.000894304	anatomical structure development	1	1	png
DDB_G0268266	GO:0048856	38.9047	1.65798	0.000894304	anatomical structure development	0	1	DDB_G0268266
DDB_G0268446	GO:0048856	38.9047	1.65798	0.000894304	anatomical structure development	1	1	cbhA
DDB_G0268578	GO:0048856	38.9047	1.65798	0.000894304	anatomical structure development	0	1	gefV
DDB_G0268632	GO:0048856	38.9047	1.65798	0.000894304	anatomical structure development	0	1	abpA
DDB_G0268636	GO:0048856	38.9047	1.65798	0.000894304	anatomical structure development	0	1	roco11
DDB_G0268790	GO:0048856	38.9047	1.65798	0.000894304	anatomical structure development	0	1	DDB_G0268790
DDB_G0268920	GO:0048856	38.9047	1.65798	0.000894304	anatomical structure development	0	1	mef2A
DDB_G0269100	GO:0048856	38.9047	1.65798	0.000894304	anatomical structure development	1	1	abpC
DDB_G0269108	GO:0048856	38.9047	1.65798	0.000894304	anatomical structure development	0	1	catB
DDB_G0269112	GO:0048856	38.9047	1.65798	0.000894304	anatomical structure development	0	1	celB
DDB_G0269124	GO:0048856	38.9047	1.65798	0.000894304	anatomical structure development	1	1	dcsA
DDB_G0269152	GO:0048856	38.9047	1.65798	0.000894304	anatomical structure development	0	1	mekA
DDB_G0269154	GO:0048856	38.9047	1.65798	0.000894304	anatomical structure development	0	1	modA
DDB_G0269160	GO:0048856	38.9047	1.65798	0.000894304	anatomical structure development	0	1	nxnA
DDB_G0269166	GO:0048856	38.9047	1.65798	0.000894304	anatomical structure development	0	1	pakA
DDB_G0269184	GO:0048856	38.9047	1.65798	0.000894304	anatomical structure development	0	1	rzpA
[truncated: 10,634 more rows]

## Sheet: Up_Ka_expression_over_BP
Gene_ID	GO_code	expCount	oddsRatio	p_value	GO_term	Up_Ka_expression	Name
[truncated: 87,711 more rows]

[truncated: 1 more sheets: Up_Ax_expression_over_BP]
